# Supplementary material for: Genome-Resolved In Silico Analysis of Poultry and Swine Lactobacillales Provides a Data- Driven Framework for Elucidating Metabolic Synergies in Multi-Strain Probiotics
Source: Research Square preprint supplement (doi:10.21203/rs.3.rs-7234892/v1), 2025-08-12
Supplement: Supplementary file 1 [file 3c3490d3cefe97cbb59a0e08.xlsx]

## Sheet: E_lactis
Assembly Accession	Assembly Name	Assembly Stats Total Sequence Length (pb)	Assembly Level	Assembly BioProject Accession	Assembly BioSample Accession	Annotation Count Gene Total	Annotation Count Gene Protein-coding	Annotation Count Gene Pseudogene	CheckM marker set	CheckM completeness	CheckM contamination	Country	Isolation source
GCF_009735405.1	ASM973540v1	2638796	Scaffold	PRJNA592313	SAMN13420646	2589	2418	95	Enterococcus	98.91	0.27	China	absent
GCF_009735435.1	ASM973543v1	2692838	Contig	PRJNA592323	SAMN13421945	2624	2411	142	Enterococcus	99.24	0.27	China	absent
GCF_009735475.1	ASM973547v1	2769911	Contig	PRJNA592426	SAMN13426597	2737	2533	134	Enterococcus	98.46	0.5	China	absent
GCF_013867815.1	ASM1386781v1	2869067	Contig	PRJNA647640	SAMN15579841	2836	2633	130	Enterococcus	99.23	0.08	China	absent
GCF_030815165.1	ASM3081516v1	2863227	Contig	PRJNA976381	SAMN35367925	2828	2632	121	Enterococcus	99.23	0.08	USA	absent
GCF_018069745.1	ASM1806974v1	2831734	Contig	PRJNA720532	SAMN18653197	2838	2668	88	Enterococcus	99.03	0.38	Russia	Bos taurus
GCF_018069825.1	ASM1806982v1	2643596	Contig	PRJNA720532	SAMN18653198	2607	2417	103	Enterococcus	98.71	0.27	Russia	Bos taurus
GCF_021122525.1	ASM2112252v1	2637433	Contig	PRJNA670413	SAMN16495294	2591	2411	103	Enterococcus	98.52	0.27	Belgium	Bos taurus
GCF_030490365.1	ASM3049036v1	2707147	Complete Genome	PRJNA993148	SAMN36380979	2642	2458	94	Enterococcus	99.16	0.27	Argentina	Bovine
GCF_016599235.1	ASM1659923v1	2788477	Contig	PRJNA686231	SAMN17109561	2790	2571	152	Enterococcus	99.13	0.7	India	Built environment
GCF_020556865.1	ASM2055686v1	2630395	Contig	PRJNA662979	SAMN16124481	2609	2415	126	Enterococcus	99.42	0.89	Germany	Built environment
GCF_020556885.1	ASM2055688v1	2753225	Contig	PRJNA662979	SAMN16124480	2745	2563	113	Enterococcus	99.37	0.31	Germany	Built environment
GCF_024581245.1	ASM2458124v1	2850366	Contig	PRJNA670330	SAMN28178374	2911	2653	170	Enterococcus	99.03	1.05	USA	Built environment
GCF_029733755.1	ASM2973375v1	2687870	Contig	PRJNA896765	SAMN31565968	2651	2447	129	Enterococcus	99.42	0.27	China	Built environment
GCF_029599475.1	ASM2959947v1	2662641	Contig	PRJNA766240	SAMN21840391	2647	2472	119	Enterococcus	99.42	0.89	Russia	Dairy product
GCF_029599485.1	ASM2959948v1	2828626	Contig	PRJNA766240	SAMN21840388	2789	2610	121	Enterococcus	99.25	0.58	Russia	Dairy product
GCF_029599495.1	ASM2959949v1	2691641	Contig	PRJNA766240	SAMN21840390	2648	2475	117	Enterococcus	99.42	0.27	Russia	Dairy product
GCF_029599525.1	ASM2959952v1	2753983	Contig	PRJNA766240	SAMN21840392	2736	2496	184	Enterococcus	98.1	0.32	Russia	Dairy product
GCF_029599555.1	ASM2959955v1	2786756	Contig	PRJNA766240	SAMN21840389	2828	2535	201	Enterococcus	98.1	0.82	Russia	Dairy product
GCF_029599635.1	ASM2959963v1	2764152	Contig	PRJNA766240	SAMN21840386	2757	2499	192	Enterococcus	98.1	0.27	Russia	Dairy product
GCF_029599655.1	ASM2959965v1	2750096	Contig	PRJNA766240	SAMN21840387	2741	2495	184	Enterococcus	98.1	0.27	Russia	Dairy product
GCF_029600255.1	ASM2960025v1	2668707	Contig	PRJNA766240	SAMN21840356	2629	2457	113	Enterococcus	99.42	0.5	Kazakhstan	Dairy product
GCF_032436005.1	ASM3243600v1	2744520	Contig	PRJNA1014785	SAMN37341866	2705	2466	158	Enterococcus	99.42	0.5	China	Drosophila food
GCF_019203145.1	ASM1920314v1	2782591	Complete Genome	PRJNA742929	SAMN19988607	2690	2471	130	Enterococcus	99.24	0.27	China	fecal sample
GCF_005116555.1	ASM511655v1	2717521	Contig	PRJNA493554	SAMN11370923	2666	2531	65	Enterococcus	99.32	0.27	India	Fermented food
GCF_009735495.1	ASM973549v1	2867482	Scaffold	PRJNA592424	SAMN13426595	2837	2633	130	Enterococcus	99.23	0.08	Italy	Fermented food
GCF_015751045.1	ASM1575104v1	2867560	Contig	PRJDB7793	SAMD00255145	2837	2634	137	Enterococcus	99.23	0.08	Italy	Fermented food
GCF_015751065.1	ASM1575106v1	2574248	Contig	PRJDB7793	SAMD00255146	2518	2363	97	Enterococcus	99.32	0.08	China	Fermented food
GCF_015751085.1	ASM1575108v1	2788451	Contig	PRJDB7793	SAMD00255147	2711	2572	65	Enterococcus	99.32	0.27	China	Fermented food
GCF_015767715.1	ASM1576771v1	2720716	Complete Genome	PRJNA680830	SAMN16925192	2644	2475	78	Enterococcus	99.23	0.08	Italy	Fermented food
GCF_015904215.1	ASM1590421v1	2915113	Scaffold	PRJNA681448	SAMN16954047	2953	2670	213	Enterococcus	99.23	0.08	Italy	Fermented food
GCF_016767495.1	ASM1676749v1	2796209	Contig	PRJNA417883	SAMN08009728	2780	2607	118	Enterococcus	99.42	0.08	China	Fermented food
GCF_016767515.1	ASM1676751v1	2881833	Contig	PRJNA417883	SAMN08009707	2829	2697	71	Enterococcus	99.42	0.27	China	Fermented food
GCF_016767535.1	ASM1676753v1	2769937	Contig	PRJNA417883	SAMN08009725	2733	2553	121	Enterococcus	99.23	0.66	China	Fermented food
GCF_016767545.1	ASM1676754v1	2880740	Contig	PRJNA417883	SAMN08009706	2821	2690	75	Enterococcus	99.42	0.27	China	Fermented food
GCF_016767575.1	ASM1676757v1	2796139	Contig	PRJNA417883	SAMN08009727	2777	2605	116	Enterococcus	99.42	0.08	China	Fermented food
GCF_016767595.1	ASM1676759v1	2806084	Contig	PRJNA417883	SAMN08009704	2790	2617	114	Enterococcus	99.34	0.66	China	Fermented food
GCF_016767615.1	ASM1676761v1	2806551	Contig	PRJNA417883	SAMN08009702	2807	2626	119	Enterococcus	99.42	0.66	China	Fermented food
GCF_016767635.1	ASM1676763v1	2797415	Contig	PRJNA417883	SAMN08009700	2771	2593	123	Enterococcus	99.42	1.04	China	Fermented food
GCF_016767645.1	ASM1676764v1	2754734	Contig	PRJNA417883	SAMN08009699	2754	2572	126	Enterococcus	99.23	0.74	China	Fermented food
GCF_016767675.1	ASM1676767v1	2738286	Contig	PRJNA417883	SAMN08009698	2667	2498	115	Enterococcus	99.23	0.7	China	Fermented food
GCF_022509645.1	ASM2250964v1	2625750	Scaffold	PRJNA744373	SAMN22187332	2559	2406	92	Enterococcus	98.81	0.27	Pakistan	Fermented food
GCF_022509665.1	ASM2250966v1	2672289	Contig	PRJNA744373	SAMN20114161	2641	2415	147	Enterococcus	99.42	0.69	Pakistan	Fermented food
GCF_022586915.1	ASM2258691v1	2593628	Contig	PRJNA813579	SAMN26510317	2524	2389	86	Enterococcus	98.91	0.27	Canada	Fermented food
GCF_023612275.1	ASM2361227v1	2765349	Complete Genome	PRJNA672223	SAMN16561002	2688	2537	60	Enterococcus	99.15	0.27	South Korea	Fermented food
GCF_023653355.1	ASM2365335v1	2742182	Contig	PRJNA843880	SAMN28771987	2704	2519	95	Enterococcus	99.42	0.27	South Korea	Fermented food
GCF_028613905.1	ASM2861390v1	2721682	Contig	PRJNA912330	SAMN32237615	2700	2500	132	Enterococcus	99.42	0.6	South Korea	Fermented food
GCF_028888065.1	ASM2888806v1	2743117	Scaffold	PRJNA793227	SAMN24518866	2762	2556	140	Enterococcus	98.9	0.89	Mongolia	Fermented food
GCF_029599645.1	ASM2959964v1	2676765	Contig	PRJNA766240	SAMN21840384	2638	2465	118	Enterococcus	99.23	1.27	China	Fermented food
GCF_029599665.1	ASM2959966v1	2675920	Contig	PRJNA766240	SAMN21840383	2645	2473	116	Enterococcus	99.23	1.27	China	Fermented food
GCF_029599715.1	ASM2959971v1	2757725	Contig	PRJNA766240	SAMN21840385	2943	2652	237	Enterococcus	99.23	2.43	China	Fermented food
GCF_029599735.1	ASM2959973v1	2668097	Contig	PRJNA766240	SAMN21840380	2626	2441	130	Enterococcus	99.42	0.6	China	Fermented food
GCF_029599755.1	ASM2959975v1	2668229	Contig	PRJNA766240	SAMN21840378	2647	2469	122	Enterococcus	99.42	0.89	China	Fermented food
GCF_029599765.1	ASM2959976v1	2635384	Contig	PRJNA766240	SAMN21840381	2576	2415	106	Enterococcus	99.32	0.27	China	Fermented food
GCF_029599795.1	ASM2959979v1	2650139	Contig	PRJNA766240	SAMN21840382	2676	2449	171	Enterococcus	98.72	1.43	China	Fermented food
GCF_029599805.1	ASM2959980v1	2747112	Contig	PRJNA766240	SAMN21840379	2676	2506	115	Enterococcus	99.42	0.6	China	Fermented food
GCF_029599835.1	ASM2959983v1	2611173	Contig	PRJNA766240	SAMN21840377	2548	2401	88	Enterococcus	99.03	0.66	China	Fermented food
GCF_029599855.1	ASM2959985v1	2676511	Contig	PRJNA766240	SAMN21840375	2647	2474	116	Enterococcus	99.23	1.27	China	Fermented food
GCF_029599865.1	ASM2959986v1	2696210	Contig	PRJNA766240	SAMN21840376	2653	2491	107	Enterococcus	99.42	0.5	China	Fermented food
GCF_029599895.1	ASM2959989v1	2725864	Contig	PRJNA766240	SAMN21840373	2705	2526	120	Enterococcus	98.46	0.89	China	Fermented food
GCF_029599905.1	ASM2959990v1	2695608	Contig	PRJNA766240	SAMN21840374	2667	2500	111	Enterococcus	99.42	0.5	China	Fermented food
GCF_029599935.1	ASM2959993v1	2660649	Contig	PRJNA766240	SAMN21840372	2617	2463	97	Enterococcus	99.32	0.5	China	Fermented food
GCF_029599955.1	ASM2959995v1	2712240	Contig	PRJNA766240	SAMN21840369	2688	2525	106	Enterococcus	99.32	0.5	China	Fermented food
GCF_029599965.1	ASM2959996v1	2649302	Contig	PRJNA766240	SAMN21840371	2620	2465	100	Enterococcus	98.75	0.5	China	Fermented food
GCF_029599995.1	ASM2959999v1	2650049	Contig	PRJNA766240	SAMN21840370	2638	2480	102	Enterococcus	98.75	0.5	China	Fermented food
GCF_029600005.1	ASM2960000v1	2660114	Contig	PRJNA766240	SAMN21840368	2618	2467	97	Enterococcus	99.32	0.5	China	Fermented food
GCF_029600035.1	ASM2960003v1	2668436	Contig	PRJNA766240	SAMN21840367	2651	2474	122	Enterococcus	99.42	0.89	China	Fermented food
GCF_029600055.1	ASM2960005v1	2755928	Contig	PRJNA766240	SAMN21840366	2700	2552	92	Enterococcus	99.28	0.31	China	Fermented food
GCF_029600075.1	ASM2960007v1	2673527	Contig	PRJNA766240	SAMN21840364	2631	2476	102	Enterococcus	99.32	0.5	China	Fermented food
GCF_029600085.1	ASM2960008v1	2673108	Contig	PRJNA766240	SAMN21840365	2647	2491	101	Enterococcus	99.23	0.5	China	Fermented food
GCF_029600115.1	ASM2960011v1	2736933	Contig	PRJNA766240	SAMN21840363	2717	2546	114	Enterococcus	99.32	0.5	China	Fermented food
GCF_029600135.1	ASM2960013v1	2766404	Contig	PRJNA766240	SAMN21840362	2747	2570	122	Enterococcus	98.99	0.5	China	Fermented food
GCF_029600155.1	ASM2960015v1	2791060	Contig	PRJNA766240	SAMN21840361	2773	2572	141	Enterococcus	99.21	0.58	China	Fermented food
GCF_029600175.1	ASM2960017v1	2650211	Contig	PRJNA766240	SAMN21840358	2620	2461	100	Enterococcus	99.13	0.5	China	Fermented food
GCF_029600195.1	ASM2960019v1	2691329	Contig	PRJNA766240	SAMN21840359	2654	2481	112	Enterococcus	99.42	0.5	China	Fermented food
GCF_029600205.1	ASM2960020v1	2692084	Contig	PRJNA766240	SAMN21840360	2650	2487	110	Enterococcus	99.32	0.6	China	Fermented food
GCF_029600235.1	ASM2960023v1	2650103	Contig	PRJNA766240	SAMN21840357	2622	2463	99	Enterococcus	98.75	0.5	China	Fermented food
GCF_036324345.1	ASM3632434v1	2880365	Complete Genome	PRJNA1061760	SAMN39280960	2866	2652	125	Enterococcus	99.42	0.5	South Korea	Fermented food
GCF_039564095.1	ASM3956409v1	2909961	Scaffold	PRJNA1105457	SAMN41103222	3016	2708	230	Enterococcus	99.42	1.67	South Korea	Fermented food
GCF_039564165.1	ASM3956416v1	2789119	Scaffold	PRJNA1105458	SAMN41103223	2816	2588	156	Enterococcus	99.42	0.64	South Korea	Fermented food
GCF_039564195.1	ASM3956419v1	2960263	Scaffold	PRJNA1105461	SAMN41103226	3105	2756	275	Enterococcus	99.42	2.05	South Korea	Fermented food
GCF_009735445.1	ASM973544v1	2774181	Contig	PRJNA592318	SAMN13420654	2736	2530	131	Enterococcus	99.37	0.08	China	Food
GCF_017942505.1	ASM1794250v1	2703337	Contig	PRJNA541552	SAMN18529541	2657	2505	99	Enterococcus	99.32	0.27	Canada	Food
GCF_030769805.1	ASM3076980v1	3283842	Scaffold	PRJNA1004551	SAMN36943770	3366	3064	234	Enterococcus	99.28	1.68	South Africa	Food
GCF_030769865.1	ASM3076986v1	2810461	Contig	PRJNA1004554	SAMN36943777	2845	2638	143	Enterococcus	99.32	0.27	South Africa	Food
GCF_019967715.1	ASM1996771v1	2786605	Complete Genome	PRJNA760985	SAMN21240282	2730	2523	116	Enterococcus	99.23	0.7	China	Gallus gallus
GCF_020406935.1	ASM2040693v1	2666583	Contig	PRJNA269675	SAMN21907306	2637	2435	124	Enterococcus	99.03	0.5	Russia	Gallus gallus
GCF_029624215.1	ASM2962421v1	2773221	Contig	PRJNA948394	SAMN33901077	2801	2568	144	Enterococcus	99.03	0.82	Portugal	Gallus gallus
GCF_029624295.1	ASM2962429v1	2633628	Contig	PRJNA948394	SAMN33901065	2714	2371	269	Enterococcus	99.16	0.08	Portugal	Gallus gallus
GCF_029624325.1	ASM2962432v1	2809515	Contig	PRJNA948394	SAMN33901059	2814	2586	145	Enterococcus	99.42	0.69	Portugal	Gallus gallus
GCF_029624375.1	ASM2962437v1	2809203	Contig	PRJNA948394	SAMN33901060	2824	2596	145	Enterococcus	99.42	0.69	Portugal	Gallus gallus
GCF_029624415.1	ASM2962441v1	2965409	Contig	PRJNA948394	SAMN33901069	2962	2763	117	Enterococcus	99.18	0.08	Portugal	Gallus gallus
GCF_029624455.1	ASM2962445v1	2634257	Contig	PRJNA948394	SAMN33901064	2712	2369	269	Enterococcus	99.16	0.08	Portugal	Gallus gallus
GCF_029624485.1	ASM2962448v1	2613365	Contig	PRJNA948394	SAMN33901068	2666	2335	257	Enterococcus	99.16	0.08	Portugal	Gallus gallus
GCF_029624545.1	ASM2962454v1	2795607	Contig	PRJNA948394	SAMN33901076	2789	2602	119	Enterococcus	99.03	0.82	Portugal	Gallus gallus
GCF_029624585.1	ASM2962458v1	2638091	Contig	PRJNA948394	SAMN33901066	2709	2377	258	Enterococcus	99.16	0.14	Portugal	Gallus gallus
GCF_031929285.1	ASM3192928v1	2870943	Contig	PRJNA948548	SAMN33919454	2891	2676	147	Enterococcus	99.42	0.69	China	Gallus gallus
GCF_016863785.1	ASM1686378v1	2892149	Scaffold	PRJNA690064	SAMN17227044	2813	2673	71	Enterococcus	99.12	0.08	India	Goat
GCF_020268645.1	ASM2026864v1	3073413	Complete Genome	PRJNA761885	SAMN21366099	3066	2824	150	Enterococcus	99.37	1.27	China	Goat
GCF_023956365.1	ASM2395636v1	2648130	Contig	PRJNA851427	SAMN29224784	2616	2440	114	Enterococcus	99.23	0.5	Ghana	Goat
GCF_020405655.1	ASM2040565v1	2817242	Contig	PRJNA269675	SAMN21907300	2889	2628	175	Enterococcus	99.29	0.69	Russia	Homo sapiens
GCF_020405675.1	ASM2040567v1	2790084	Contig	PRJNA269675	SAMN21907292	2796	2568	144	Enterococcus	99.42	1.02	Russia	Homo sapiens
GCF_020405685.1	ASM2040568v1	2956692	Contig	PRJNA269675	SAMN21907301	2940	2762	98	Enterococcus	98.99	0.08	Russia	Homo sapiens
GCF_020405775.1	ASM2040577v1	2708884	Contig	PRJNA269675	SAMN21907285	2712	2484	145	Enterococcus	99.32	0.5	Russia	Homo sapiens
GCF_020405785.1	ASM2040578v1	2705121	Contig	PRJNA269675	SAMN21907286	2717	2478	157	Enterococcus	99.32	0.5	Russia	Homo sapiens
GCF_020405815.1	ASM2040581v1	2708913	Contig	PRJNA269675	SAMN21907296	2719	2490	146	Enterococcus	99.32	0.5	Russia	Homo sapiens
GCF_020405935.1	ASM2040593v1	2712742	Contig	PRJNA269675	SAMN21907283	2745	2504	159	Enterococcus	99.32	0.5	Russia	Homo sapiens
GCF_020405965.1	ASM2040596v1	2705552	Contig	PRJNA269675	SAMN21907284	2714	2481	151	Enterococcus	99.32	0.5	Russia	Homo sapiens
GCF_020406915.1	ASM2040691v1	2710032	Contig	PRJNA269675	SAMN21907287	2724	2488	154	Enterococcus	99.32	0.5	Russia	Homo sapiens
GCF_020593225.1	ASM2059322v1	2880224	Contig	PRJNA737800	SAMN22167494	2889	2656	153	Enterococcus	99.42	0.11	USA	Homo sapiens
GCF_020593395.1	ASM2059339v1	2519630	Contig	PRJNA737800	SAMN22167485	2487	2312	94	Enterococcus	99.28	0.32	USA	Homo sapiens
GCF_026183755.1	ASM2618375v1	2823752	Contig	PRJNA851953	SAMN29257248	2821	2621	133	Enterococcus	99.42	0.5	Portugal	Homo sapiens
GCF_026183775.1	ASM2618377v1	2616532	Contig	PRJNA851953	SAMN29257247	2583	2401	116	Enterococcus	99.42	0.27	Portugal	Homo sapiens
GCF_026183795.1	ASM2618379v1	2522771	Contig	PRJNA851953	SAMN29257246	2428	2268	94	Enterococcus	99.42	0.66	Portugal	Homo sapiens
GCF_026183815.1	ASM2618381v1	2560672	Contig	PRJNA851953	SAMN29257245	2541	2315	160	Enterococcus	99.25	0.23	Portugal	Homo sapiens
GCF_026183835.1	ASM2618383v1	2560672	Contig	PRJNA851953	SAMN29257244	2541	2315	160	Enterococcus	99.25	0.23	Portugal	Homo sapiens
GCF_027660865.1	ASM2766086v1	2747718	Scaffold	PRJNA903559	SAMN31808608	2658	2558	55	Enterococcus	99.32	0.27	China	Homo sapiens
GCF_027667265.1	ASM2766726v1	2753760	Scaffold	PRJNA903559	SAMN31809242	2709	2542	116	Enterococcus	99.42	0.66	China	Homo sapiens
GCF_027667605.1	ASM2766760v1	2747000	Scaffold	PRJNA903559	SAMN31809232	2733	2570	115	Enterococcus	99.42	0.89	China	Homo sapiens
GCF_027667845.1	ASM2766784v1	2822490	Scaffold	PRJNA903559	SAMN31809226	2810	2627	132	Enterococcus	99.42	1.09	China	Homo sapiens
GCF_027668185.1	ASM2766818v1	2749258	Scaffold	PRJNA903559	SAMN31809216	2731	2552	119	Enterococcus	99.42	0.89	China	Homo sapiens
GCF_027670765.1	ASM2767076v1	2748502	Scaffold	PRJNA903559	SAMN31809119	2715	2560	110	Enterococcus	99.42	0.89	China	Homo sapiens
GCF_027670925.1	ASM2767092v1	2744931	Scaffold	PRJNA903559	SAMN31809115	2724	2555	119	Enterococcus	99.42	0.89	China	Homo sapiens
GCF_027672545.1	ASM2767254v1	2718407	Scaffold	PRJNA903559	SAMN31809037	2652	2492	115	Enterococcus	99.18	0.66	China	Homo sapiens
GCF_027672745.1	ASM2767274v1	2714438	Scaffold	PRJNA903559	SAMN31809023	2634	2463	128	Enterococcus	99.32	0.27	China	Homo sapiens
GCF_027673865.1	ASM2767386v1	2662592	Scaffold	PRJNA903559	SAMN31808994	2588	2432	101	Enterococcus	99.42	0.27	China	Homo sapiens
GCF_027675565.1	ASM2767556v1	2722957	Scaffold	PRJNA903559	SAMN31809497	2679	2512	111	Enterococcus	98.81	0.66	China	Homo sapiens
GCF_027675645.1	ASM2767564v1	2737363	Scaffold	PRJNA903559	SAMN31809493	2721	2556	107	Enterococcus	99.37	0.08	China	Homo sapiens
GCF_027675725.1	ASM2767572v1	2735067	Scaffold	PRJNA903559	SAMN31809489	2701	2542	107	Enterococcus	99.37	0.08	China	Homo sapiens
GCF_027675735.1	ASM2767573v1	2737963	Scaffold	PRJNA903559	SAMN31809492	2707	2539	108	Enterococcus	99.37	0.08	China	Homo sapiens
GCF_027675745.1	ASM2767574v1	2744728	Scaffold	PRJNA903559	SAMN31809491	2714	2553	107	Enterococcus	99.37	0.08	China	Homo sapiens
GCF_027675805.1	ASM2767580v1	2711179	Scaffold	PRJNA903559	SAMN31809488	2645	2417	180	Enterococcus	98.14	0.27	China	Homo sapiens
GCF_027675915.1	ASM2767591v1	2746115	Scaffold	PRJNA903559	SAMN31809480	2706	2543	108	Enterococcus	99.37	0.08	China	Homo sapiens
GCF_027676385.1	ASM2767638v1	2718601	Scaffold	PRJNA903559	SAMN31809459	2655	2404	200	Enterococcus	97.96	0.19	China	Homo sapiens
GCF_027676425.1	ASM2767642v1	3000786	Scaffold	PRJNA903559	SAMN31809457	3044	2831	185	Enterococcus	97.72	0.52	China	Homo sapiens
GCF_027676495.1	ASM2767649v1	2719792	Scaffold	PRJNA903559	SAMN31809466	2667	2503	113	Enterococcus	98.81	0.66	China	Homo sapiens
GCF_027676575.1	ASM2767657v1	2705647	Scaffold	PRJNA903559	SAMN31809454	2654	2400	196	Enterococcus	97.96	0.19	China	Homo sapiens
GCF_027676665.1	ASM2767666v1	2738243	Scaffold	PRJNA903559	SAMN31809451	2709	2552	114	Enterococcus	99.37	0.08	China	Homo sapiens
GCF_027676695.1	ASM2767669v1	2951483	Scaffold	PRJNA903559	SAMN31809448	3077	2745	306	Enterococcus	96.06	0.87	China	Homo sapiens
GCF_027676705.1	ASM2767670v1	2993435	Scaffold	PRJNA903559	SAMN31809450	3047	2795	225	Enterococcus	97.4	1.68	China	Homo sapiens
GCF_027676765.1	ASM2767676v1	2990043	Scaffold	PRJNA903559	SAMN31809447	3040	2787	223	Enterococcus	96.6	2.73	China	Homo sapiens
GCF_027678895.1	ASM2767889v1	2807629	Scaffold	PRJNA903559	SAMN31809375	2767	2594	117	Enterococcus	99.13	1.27	China	Homo sapiens
GCF_027679445.1	ASM2767944v1	2746229	Scaffold	PRJNA903559	SAMN31809348	2690	2517	129	Enterococcus	99.23	1.09	China	Homo sapiens
GCF_027679825.1	ASM2767982v1	2783485	Scaffold	PRJNA903559	SAMN31809328	2747	2595	106	Enterococcus	99.13	1.27	China	Homo sapiens
GCF_027684345.1	ASM2768434v1	2744479	Scaffold	PRJNA903559	SAMN31807896	2712	2550	116	Enterococcus	99.42	0.89	China	Homo sapiens
GCF_027685895.1	ASM2768589v1	2685277	Scaffold	PRJNA903559	SAMN31807824	2606	2460	98	Enterococcus	99.37	0.08	China	Homo sapiens
GCF_027686015.1	ASM2768601v1	2800570	Scaffold	PRJNA903559	SAMN31807821	2722	2557	113	Enterococcus	99.37	0.11	China	Homo sapiens
GCF_027687165.1	ASM2768716v1	2824063	Scaffold	PRJNA903559	SAMN31807764	2832	2578	194	Enterococcus	98.06	0.23	China	Homo sapiens
GCF_027687175.1	ASM2768717v1	2793083	Scaffold	PRJNA903559	SAMN31807763	2761	2576	127	Enterococcus	99	1.27	China	Homo sapiens
GCF_027687255.1	ASM2768725v1	2797881	Scaffold	PRJNA903559	SAMN31807759	2774	2600	113	Enterococcus	99.32	0.5	China	Homo sapiens
GCF_027687325.1	ASM2768732v1	2789485	Scaffold	PRJNA903559	SAMN31807757	2746	2571	112	Enterococcus	98.75	1.43	China	Homo sapiens
GCF_027687855.1	ASM2768785v1	2746134	Scaffold	PRJNA903559	SAMN31807731	2722	2550	118	Enterococcus	99.42	0.89	China	Homo sapiens
GCF_027688035.1	ASM2768803v1	2745284	Scaffold	PRJNA903559	SAMN31807721	2734	2564	115	Enterococcus	99.42	0.89	China	Homo sapiens
GCF_027691115.1	ASM2769111v1	2743941	Scaffold	PRJNA903559	SAMN31809793	2761	2571	126	Enterococcus	99.03	0.5	China	Homo sapiens
GCF_027691285.1	ASM2769128v1	2736559	Scaffold	PRJNA903559	SAMN31809788	2730	2553	127	Enterococcus	99.03	0.5	China	Homo sapiens
GCF_027691345.1	ASM2769134v1	2744379	Scaffold	PRJNA903559	SAMN31809786	2713	2550	113	Enterococcus	99.42	0.89	China	Homo sapiens
GCF_027692905.1	ASM2769290v1	2743309	Scaffold	PRJNA903559	SAMN31809708	2714	2550	112	Enterococcus	99.42	0.89	China	Homo sapiens
GCF_027693025.1	ASM2769302v1	2744128	Scaffold	PRJNA903559	SAMN31809702	2719	2554	112	Enterococcus	99.42	0.89	China	Homo sapiens
GCF_027693085.1	ASM2769308v1	2738604	Scaffold	PRJNA903559	SAMN31809699	2714	2545	110	Enterococcus	99.42	0.89	China	Homo sapiens
GCF_027693985.1	ASM2769398v1	2745261	Scaffold	PRJNA903559	SAMN31809660	2720	2554	115	Enterococcus	99.42	0.89	China	Homo sapiens
GCF_027723505.1	ASM2772350v1	2744585	Scaffold	PRJNA903559	SAMN31808754	2728	2531	145	Enterococcus	98.52	0.85	China	Homo sapiens
GCF_027925885.1	ASM2792588v1	2814286	Contig	PRJNA869573	SAMN30311914	2798	2591	125	Enterococcus	99.37	0.08	Egypt	Homo sapiens
GCF_027925905.1	ASM2792590v1	2774613	Contig	PRJNA869573	SAMN30311161	2789	2555	153	Enterococcus	99.13	0.27	Egypt	Homo sapiens
GCF_028826015.1	ASM2882601v1	3259953	Scaffold	PRJNA903559	SAMN31809487	3402	3065	316	Enterococcus	95.12	2.37	China	Homo sapiens
GCF_029600375.1	ASM2960037v1	2712310	Contig	PRJNA766240	SAMN21840347	2670	2494	122	Enterococcus	99.18	0.66	China	Homo sapiens
GCF_029600395.1	ASM2960039v1	2739284	Contig	PRJNA766240	SAMN21840349	2703	2542	105	Enterococcus	99.32	0.66	China	Homo sapiens
GCF_029600435.1	ASM2960043v1	2713052	Contig	PRJNA766240	SAMN21840348	2693	2514	116	Enterococcus	99.42	0.5	China	Homo sapiens
GCF_029600455.1	ASM2960045v1	2827169	Contig	PRJNA766240	SAMN21840343	2809	2633	119	Enterococcus	99.36	0.27	China	Homo sapiens
GCF_029600465.1	ASM2960046v1	2716512	Contig	PRJNA766240	SAMN21840345	2665	2499	112	Enterococcus	99.42	0.4	China	Homo sapiens
GCF_029600495.1	ASM2960049v1	2734367	Contig	PRJNA766240	SAMN21840344	2714	2553	104	Enterococcus	99.32	0.5	China	Homo sapiens
GCF_029600515.1	ASM2960051v1	2716738	Contig	PRJNA766240	SAMN21840342	2674	2508	112	Enterococcus	99.42	0.4	China	Homo sapiens
GCF_029600525.1	ASM2960052v1	2625851	Contig	PRJNA766240	SAMN21840346	2577	2432	90	Enterococcus	99.03	0.33	China	Homo sapiens
GCF_031737195.1	ASM3173719v1	2752431	Scaffold	PRJNA1008900	SAMN37140643	2755	2531	134	Enterococcus	99.42	0.73	China	Homo sapiens
GCF_031929645.1	ASM3192964v1	2887944	Contig	PRJNA948548	SAMN33919440	2804	2645	90	Enterococcus	99.32	0.08	China	Homo sapiens
GCF_031929745.1	ASM3192974v1	2809473	Contig	PRJNA948548	SAMN33919443	2814	2603	145	Enterococcus	99.42	0.58	China	Homo sapiens
GCF_031929825.1	ASM3192982v1	2837571	Contig	PRJNA948548	SAMN33919439	2836	2626	143	Enterococcus	98.99	0.08	China	Homo sapiens
GCF_035791835.1	ASM3579183v1	2858286	Contig	PRJNA636233	SAMN28910748	2861	2654	124	Enterococcus	99.37	0.31	India	Homo sapiens
GCF_035791855.1	ASM3579185v1	2762216	Contig	PRJNA636233	SAMN28910749	2750	2531	141	Enterococcus	99.3	1.16	India	Homo sapiens
GCF_040092855.1	ASM4009285v1	2633673	Contig	PRJNA996881	SAMN40631518	2557	2406	93	Enterococcus	98.91	0.27	Germany	Homo sapiens
GCF_040096765.1	ASM4009676v1	2703477	Contig	PRJNA996881	SAMN40631519	2657	2500	102	Enterococcus	99.32	0.27	Germany	Homo sapiens
GCF_041196675.1	ASM4119667v1	2754157	Scaffold	PRJNA1141267	SAMN42884494	2686	2551	68	Enterococcus	97.78	0.66	China	Homo sapiens
GCF_964208315.1	FFMG_393-11-21-Q17.1	2800119	Contig	PRJEB78370	SAMEA115874916	2787	2579	145	Enterococcus	99.23	0.17	Tanzania	Homo sapiens
GCF_030237875.1	ASM3023787v1	2779806	Contig	PRJNA972326	SAMN35073034	2778	2561	139	Enterococcus	99.42	0.66	China	Milk
GCF_018397225.1	ASM1839722v1	2654274	Contig	PRJNA703331	SAMN18018083	2625	2422	109	Enterococcus	98.91	0.27	China	Probiotic product
GCF_018397255.1	ASM1839725v1	2674944	Contig	PRJNA703331	SAMN18018084	2680	2438	151	Enterococcus	99.29	0.89	China	Probiotic product
GCF_018397275.1	ASM1839727v1	2833411	Contig	PRJNA703331	SAMN18018081	2861	2571	195	Enterococcus	99.42	0.66	China	Probiotic product
GCF_018397285.1	ASM1839728v1	2675332	Contig	PRJNA703331	SAMN18018082	2675	2434	150	Enterococcus	99.35	0.89	China	Probiotic product
GCF_018397315.1	ASM1839731v1	2653949	Contig	PRJNA703331	SAMN18018079	2629	2428	108	Enterococcus	98.91	0.27	China	Probiotic product
GCF_018397325.1	ASM1839732v1	2838090	Contig	PRJNA703331	SAMN18018080	2879	2634	155	Enterococcus	99.42	0.5	China	Probiotic product
GCF_018397355.1	ASM1839735v1	2856410	Contig	PRJNA703331	SAMN18018076	2916	2633	191	Enterococcus	99.42	0.5	China	Probiotic product
GCF_018397375.1	ASM1839737v1	2654814	Contig	PRJNA703331	SAMN18018077	2634	2432	108	Enterococcus	98.91	0.27	China	Probiotic product
GCF_018397385.1	ASM1839738v1	2704641	Contig	PRJNA703331	SAMN18018075	2716	2477	146	Enterococcus	99.42	1.12	China	Probiotic product
GCF_018397395.1	ASM1839739v1	2674755	Contig	PRJNA703331	SAMN18018078	2685	2446	149	Enterococcus	99.42	0.89	China	Probiotic product
GCF_018397435.1	ASM1839743v1	2674723	Contig	PRJNA703331	SAMN18018074	2672	2433	148	Enterococcus	99.42	0.89	China	Probiotic product
GCF_018397455.1	ASM1839745v1	2651325	Contig	PRJNA703331	SAMN18018071	2618	2420	105	Enterococcus	98.91	0.32	China	Probiotic product
GCF_018397485.1	ASM1839748v1	2654396	Contig	PRJNA703331	SAMN18018070	2636	2433	110	Enterococcus	98.91	0.27	China	Probiotic product
GCF_018397515.1	ASM1839751v1	2655273	Contig	PRJNA703331	SAMN18018072	2635	2430	111	Enterococcus	98.91	0.27	China	Probiotic product
GCF_018397535.1	ASM1839753v1	2654240	Contig	PRJNA703331	SAMN18018069	2624	2424	108	Enterococcus	98.91	0.27	China	Probiotic product
GCF_018397545.1	ASM1839754v1	2877008	Contig	PRJNA703331	SAMN18018068	2969	2660	212	Enterococcus	99.42	0.28	South Korea	Probiotic product
GCF_018397575.1	ASM1839757v1	2770991	Contig	PRJNA703331	SAMN18018066	2725	2580	49	Enterococcus	99.32	0.4	Australia	Probiotic product
GCF_018397595.1	ASM1839759v1	2877153	Contig	PRJNA703331	SAMN18018067	2977	2662	217	Enterococcus	99.42	0.27	South Korea	Probiotic product
GCF_018397615.1	ASM1839761v1	2845358	Contig	PRJNA703331	SAMN18018065	2855	2613	153	Enterococcus	99.68	0.08	China	Probiotic product
GCF_018397625.1	ASM1839762v1	2776601	Contig	PRJNA703331	SAMN18018063	2818	2560	158	Enterococcus	99.32	0.66	China	Probiotic product
GCF_018397655.1	ASM1839765v1	2654136	Contig	PRJNA703331	SAMN18018064	2633	2430	109	Enterococcus	98.91	0.27	China	Probiotic product
GCF_018397675.1	ASM1839767v1	2654138	Contig	PRJNA703331	SAMN18018061	2637	2434	109	Enterococcus	98.91	0.27	China	Probiotic product
GCF_018397695.1	ASM1839769v1	2653877	Contig	PRJNA703331	SAMN18018062	2631	2427	109	Enterococcus	98.91	0.27	China	Probiotic product
GCF_018397715.1	ASM1839771v1	2771195	Contig	PRJNA703331	SAMN18018059	2713	2570	48	Enterococcus	99.32	0.27	China	Probiotic product
GCF_018397725.1	ASM1839772v1	2697315	Contig	PRJNA703331	SAMN18018058	2633	2491	43	Enterococcus	99.32	0.27	China	Probiotic product
GCF_018397745.1	ASM1839774v1	2653855	Contig	PRJNA703331	SAMN18018060	2631	2427	111	Enterococcus	98.91	0.27	China	Probiotic product
GCF_018397765.1	ASM1839776v1	2772381	Contig	PRJNA703331	SAMN18018056	2719	2569	51	Enterococcus	99.32	0.27	China	Probiotic product
GCF_018397795.1	ASM1839779v1	2771211	Contig	PRJNA703331	SAMN18018057	2713	2570	49	Enterococcus	99.32	0.27	China	Probiotic product
GCF_018397815.1	ASM1839781v1	2653984	Contig	PRJNA703331	SAMN18018054	2621	2418	109	Enterococcus	98.91	0.27	China	Probiotic product
GCF_018397835.1	ASM1839783v1	2704122	Contig	PRJNA703331	SAMN18018055	2679	2459	131	Enterococcus	99.42	0.27	China	Probiotic product
GCF_019659145.1	ASM1965914v1	2640904	Contig	PRJNA746973	SAMN20247422	2570	2415	108	Enterococcus	99.32	0.27	USA	Probiotic product
GCF_019659185.1	ASM1965918v1	2641970	Contig	PRJNA746973	SAMN20247420	2594	2421	113	Enterococcus	99.13	0.82	USA	Probiotic product
GCF_019659205.1	ASM1965920v1	2934443	Contig	PRJNA746973	SAMN20247418	2912	2714	134	Enterococcus	99.27	0.17	USA	Probiotic product
GCF_019662145.1	ASM1966214v1	2629841	Contig	PRJNA746973	SAMN20247423	2580	2408	106	Enterococcus	98.91	0.57	USA	Probiotic product
GCF_019662205.1	ASM1966220v1	2659937	Contig	PRJNA746973	SAMN20247416	2627	2450	119	Enterococcus	99.42	0.27	USA	Probiotic product
GCF_019662215.1	ASM1966221v1	2794084	Contig	PRJNA746973	SAMN20247419	2832	2583	210	Enterococcus	96.17	0.08	USA	Probiotic product
GCF_019662245.1	ASM1966224v1	2750153	Contig	PRJNA746973	SAMN20247415	2833	2497	248	Enterococcus	98.52	1.81	USA	Probiotic product
GCF_019662335.1	ASM1966233v1	2658763	Contig	PRJNA746973	SAMN20247410	2624	2440	122	Enterococcus	99.42	0.27	USA	Probiotic product
GCF_019662365.1	ASM1966236v1	2761528	Contig	PRJNA746973	SAMN20247408	2734	2531	141	Enterococcus	99.42	1.17	USA	Probiotic product
GCF_019662385.1	ASM1966238v1	2633059	Contig	PRJNA746973	SAMN20247409	2567	2410	94	Enterococcus	98.91	0.4	USA	Probiotic product
GCF_019662395.1	ASM1966239v1	2870276	Contig	PRJNA746973	SAMN20247405	2891	2677	152	Enterococcus	99.42	0.27	USA	Probiotic product
GCF_019662405.1	ASM1966240v1	2645233	Contig	PRJNA746973	SAMN20247407	2599	2426	108	Enterococcus	98.75	0.66	USA	Probiotic product
GCF_019662445.1	ASM1966244v1	2769105	Contig	PRJNA746973	SAMN20247406	2739	2538	140	Enterococcus	99.42	1.17	USA	Probiotic product
GCF_019662465.1	ASM1966246v1	2631007	Contig	PRJNA746973	SAMN20247404	2572	2407	100	Enterococcus	98.71	0.27	USA	Probiotic product
GCF_033954875.1	ASM3395487v1	2849165	Complete Genome	PRJNA953762	SAMN34123081	2835	2624	124	Enterococcus	99.03	0.5	China	Probiotic product
GCF_033954895.1	ASM3395489v1	2804644	Complete Genome	PRJNA953762	SAMN34123082	2719	2579	50	Enterococcus	99.32	0.27	China	Probiotic product
GCF_033954915.1	ASM3395491v1	2803313	Complete Genome	PRJNA953762	SAMN34123083	2719	2579	50	Enterococcus	99.32	0.27	China	Probiotic product
GCF_036669985.1	ASM3666998v1	2763469	Complete Genome	PRJNA953762	SAMN34123080	2684	2540	54	Enterococcus	99.32	0.27	China	Probiotic product
GCF_039564125.1	ASM3956412v1	2658769	Scaffold	PRJNA1105459	SAMN41103224	2650	2442	130	Enterococcus	98.91	0.27	South Korea	Probiotic product
GCF_039564145.1	ASM3956414v1	2664221	Contig	PRJNA1105460	SAMN41103225	2669	2464	134	Enterococcus	98.91	1.33	South Korea	Probiotic product
GCF_040745045.1	ASM4074504v1	2704802	Complete Genome	PRJNA1127920	SAMN42023156	2636	2402	143	Enterococcus	96.05	0.27	Denmark	Probiotic product
GCF_019343125.1	ASM1934312v1	2728070	Complete Genome	PRJNA741717	SAMN19908122	2676	2479	108	Enterococcus	99.32	0.27	China	Soil
GCF_041195995.1	ASM4119599v1	2605315	Scaffold	PRJNA1141267	SAMN42884529	2577	2403	80	Enterococcus	99.37	0.4	China	soil
GCF_041196105.1	ASM4119610v1	2735808	Scaffold	PRJNA1141267	SAMN42884508	2659	2536	41	Enterococcus	99.42	0.49	China	soil
GCF_041196135.1	ASM4119613v1	2734103	Scaffold	PRJNA1141267	SAMN42884509	2646	2530	37	Enterococcus	99.42	0.52	China	soil
GCF_041196225.1	ASM4119622v1	2743115	Scaffold	PRJNA1141267	SAMN42884523	2666	2538	45	Enterococcus	99.42	0.49	China	soil
GCF_041196595.1	ASM4119659v1	2732749	Scaffold	PRJNA1141267	SAMN42884528	2727	2543	103	Enterococcus	98.86	0.69	China	soil
GCF_041196885.1	ASM4119688v1	2779615	Scaffold	PRJNA1141267	SAMN42884531	2792	2572	140	Enterococcus	99.42	0.5	China	soil
GCF_017356435.1	ASM1735643v1	2625750	Scaffold	PRJNA523515	SAMN12374469	2556	2403	92	Enterococcus	98.81	0.27	Brazil	Spheniscus magellanicus (Magellanic penguin)
GCF_019880345.1	ASM1988034v1	2883642	Complete Genome	PRJNA755267	SAMN20834202	2870	2661	117	Enterococcus	99.37	0.08	China	Sus scrofa domesticus
GCF_021229185.1	ASM2122918v1	2833683	Scaffold	PRJNA787593	SAMN23828335	2737	2621	70	Enterococcus	99.37	0.08	Bulgaria	Sus scrofa domesticus
GCF_031929605.1	ASM3192960v1	2908500	Contig	PRJNA948548	SAMN33919446	2840	2668	102	Enterococcus	99.24	0.09	China	Sus scrofa domesticus
GCF_035794475.1	ASM3579447v1	2820579	Contig	PRJNA636233	SAMN29049678	2781	2590	105	Enterococcus	99.23	0.08	India	Sus scrofa domesticus
GCF_035794575.1	ASM3579457v1	2820763	Contig	PRJNA636233	SAMN29049677	2784	2597	101	Enterococcus	99.23	0.08	India	Sus scrofa domesticus
GCF_032842905.1	ASM3284290v1	2657678	Scaffold	PRJNA1027578	SAMN37800914	2619	2397	144	Enterococcus	99.42	1.66	South Africa	Water
GCF_033022735.1	ASM3302273v1	2839123	Scaffold	PRJNA1027576	SAMN37800813	2831	2656	101	Enterococcus	99.37	1.07	South Africa	Water
GCF_029600315.1	ASM2960031v1	2777854	Contig	PRJNA766240	SAMN21840354	2802	2507	235				China	Dairy product
GCF_029600385.1	ASM2960038v1	2777676	Contig	PRJNA766240	SAMN21840350	2799	2506	237				China	Dairy product

## Sheet: E_mundtii
Assembly Accession	Assembly Name	Assembly Stats Total Sequence Length (pb)	Assembly Level	Assembly BioProject Accession	Assembly BioSample Accession	Annotation Count Gene Total	Annotation Count Gene Protein-coding	Annotation Count Gene Pseudogene	CheckM marker set	CheckM completeness	CheckM contamination	Assembly Accession	Country	Isolation source
GCF_000393815.1	Ente_mund_ATCC882_V1	3078858	Scaffold	PRJNA88833	SAMN00809106	2967	2788	91	Enterococcus	98.92	0.5	GCF_000393815.1	absent	absent
GCF_000407465.1	Ente_mund_ATCC882_V2	3065585	Contig	PRJNA191908	SAMN02596954	2948	2789	71	Enterococcus	98.92	0.5	GCF_000407465.1	absent	absent
GCF_000504125.1	ASM50412v1	3351060	Complete Genome	PRJDB868	SAMD00061063	3215	3053	76	Enterococcus	98.19	0.06	GCF_000504125.1	absent	absent
GCF_001675535.1	ASM167553v1	2957300	Contig	PRJNA311247	SAMN04481064	2716	2634	57	Enterococcus	98.76	0.06	GCF_001675535.1	Pakistan	absent
GCF_001705215.1	ASM170521v1	3296585	Scaffold	PRJNA337899	SAMN05513637	3095	2953	79	Enterococcus	98.78	0.45	GCF_001705215.1	Germany	Spodoptera littoralis
GCF_001886035.1	ASM188603v1	3394411	Scaffold	PRJNA270385	SAMN03267178	3162	3054	77	Enterococcus	99.15	0.61	GCF_001886035.1	absent	absent
GCF_001990645.1	ASM199064v1	3325234	Scaffold	PRJNA357096	SAMN06133060	3233	3076	80	Enterococcus	98.76	0.06	GCF_001990645.1	Chile	Homo sapiens
GCF_002141315.1	ASM214131v1	3677150	Scaffold	PRJNA313452	SAMN04634001	3337	3195	68	Enterococcus	99.15	0.45	GCF_002141315.1	USA	absent
GCF_002216705.1	ASM221670v1	3014434	Complete Genome	PRJNA337899	SAMN07459877	2854	2696	71	Enterococcus	98.57	0.45	GCF_002216705.1	China	Bombyx mori
GCF_002798425.1	ASM279842v1	3134550	Scaffold	PRJNA419618	SAMN08093586	3067	2938	72	Enterococcus	98.53	0.5	GCF_002798425.1	Italy	Bombyx mori larvae
GCF_002813755.1	ASM281375v1	3504528	Complete Genome	PRJNA353761	SAMN06020033	3267	3117	65	Enterococcus	99.15	1.38	GCF_002813755.1	Germany	absent
GCF_002944895.1	ASM294489v1	3268194	Contig	PRJNA292669	SAMN07982051	3001	2894	43	Enterococcus	99.13	0.26	GCF_002944895.1	USA	absent
GCF_003048275.1	ASM304827v1	3127211	Contig	PRJNA436479	SAMN08627156	2884	2787	33	Enterococcus	99.15	0.16	GCF_003048275.1	Kenya	Homo sapiens
GCF_003048305.1	ASM304830v1	3195996	Contig	PRJNA436689	SAMN08627157	2977	2825	87	Enterococcus	98.96	0.55	GCF_003048305.1	Kenya	absent
GCF_004167255.1	ASM416725v1	3382442	Contig	PRJNA496358	SAMN10239547	3141	3010	64	Enterococcus	99.15	0.61	GCF_004167255.1	USA	Homo sapiens
GCF_005158285.1	ASM515828v1	3204082	Complete Genome	PRJNA453425	SAMN08978749	3088	2958	43	Enterococcus	99.15	0.06	GCF_005158285.1	South Korea	absent
GCF_007990125.1	ASM799012v1	3395221	Contig	PRJDB6088	SAMD00166256	3190	3069	62	Enterococcus	99.15	0.61	GCF_007990125.1	absent	absent
GCF_009659805.1	ASM965980v1	3655801	Scaffold	PRJNA529699	SAMN11281797	4052	3590	397	Enterococcus	99.34	16.71	GCF_009659805.1	USA	absent
GCF_009890745.1	ASM989074v1	3385722	Contig	PRJNA544527	SAMN11945545	3139	3009	60	Enterococcus	99.15	0.61	GCF_009890745.1	USA	Homo sapiens
GCF_009890755.1	ASM989075v1	3385696	Scaffold	PRJNA544527	SAMN11945544	3144	3022	61	Enterococcus	99.15	0.61	GCF_009890755.1	USA	Homo sapiens
GCF_009890785.1	ASM989078v1	3384881	Contig	PRJNA544527	SAMN11945543	3139	3013	58	Enterococcus	99.15	0.61	GCF_009890785.1	USA	Homo sapiens
GCF_009890805.1	ASM989080v1	3392891	Scaffold	PRJNA544527	SAMN11945542	3153	3021	62	Enterococcus	99.15	0.61	GCF_009890805.1	USA	Homo sapiens
GCF_009890815.1	ASM989081v1	3421180	Scaffold	PRJNA544527	SAMN11945540	3154	3036	65	Enterococcus	99.15	0.61	GCF_009890815.1	USA	Homo sapiens
GCF_009890825.1	ASM989082v1	3402118	Scaffold	PRJNA544527	SAMN11945539	3161	3036	68	Enterococcus	99.15	0.61	GCF_009890825.1	USA	Homo sapiens
GCF_009890865.1	ASM989086v1	3405194	Scaffold	PRJNA544527	SAMN11945541	3164	3026	71	Enterococcus	99.15	0.61	GCF_009890865.1	USA	Homo sapiens
GCF_009890875.1	ASM989087v1	3394318	Scaffold	PRJNA544527	SAMN11945538	3168	3022	82	Enterococcus	99.15	0.61	GCF_009890875.1	USA	Homo sapiens
GCF_009890905.1	ASM989090v1	3389610	Scaffold	PRJNA544527	SAMN11945537	3148	3015	64	Enterococcus	99.15	0.61	GCF_009890905.1	USA	Homo sapiens
GCF_009890915.1	ASM989091v1	3446172	Scaffold	PRJNA544527	SAMN11945536	3213	3084	74	Enterococcus	99.15	0.69	GCF_009890915.1	USA	Homo sapiens
GCF_009890935.1	ASM989093v1	3604820	Scaffold	PRJNA544527	SAMN11945535	3394	3247	96	Enterococcus	99.05	2.77	GCF_009890935.1	USA	Homo sapiens
GCF_009890985.1	ASM989098v1	3397415	Scaffold	PRJNA544527	SAMN11945534	3157	3020	70	Enterococcus	99.15	0.61	GCF_009890985.1	USA	Homo sapiens
GCF_009893025.1	ASM989302v1	3376797	Scaffold	PRJNA544527	SAMN11945533	3138	3009	69	Enterococcus	99.15	0.61	GCF_009893025.1	USA	Homo sapiens
GCF_009906575.1	ASM990657v1	3633087	Contig	PRJNA600044	SAMN13781240	3411	3269	70	Enterococcus	99.15	0.61	GCF_009906575.1	China	absent
GCF_012935515.1	ASM1293551v1	3389182	Contig	PRJNA269675	SAMN14600455	3354	3191	107	Enterococcus	99.15	0.06	GCF_012935515.1	Russia	absent
GCF_013394305.1	ASM1339430v1	3295768	Complete Genome	PRJDB8488	SAMD00177104	3160	3009	64	Enterococcus	99.12	0.24	GCF_013394305.1	absent	absent
GCF_015230405.1	ASM1523040v1	3087128	Contig	PRJNA609650	SAMN14257475	2914	2801	48	Enterococcus	99.15	0.26	GCF_015230405.1	South Africa	Environment
GCF_015550885.1	ASM1555088v1	3154045	Scaffold	PRJNA637878	SAMN15532677	2876	2776	46	Enterococcus	99.15	0.06	GCF_015550885.1	USA	Homo sapiens
GCF_015551665.1	ASM1555166v1	3031329	Scaffold	PRJNA637878	SAMN15533015	2786	2694	30	Enterococcus	99.15	0.06	GCF_015551665.1	USA	Homo sapiens
GCF_015555705.1	ASM1555570v1	3247431	Scaffold	PRJNA637878	SAMN15532398	3028	2904	62	Enterococcus	99.15	0.16	GCF_015555705.1	USA	Homo sapiens
GCF_017356615.1	ASM1735661v1	3156314	Scaffold	PRJNA523515	SAMN12384645	2962	2859	30	Enterococcus	99.15	0.88	GCF_017356615.1	Brazil	Spheniscus magellanicus (Magellanic penguin)
GCF_020149485.1	ASM2014948v1	3258263	Complete Genome	PRJNA761892	SAMN21366135	3118	2995	36	Enterococcus	99.1	0.06	GCF_020149485.1	China	milk
GCF_020406015.1	ASM2040601v1	3165767	Contig	PRJNA269675	SAMN21907279	3033	2888	66	Enterococcus	99.15	0.26	GCF_020406015.1	Russia	broiler chicken
GCF_022048965.1	ASM2204896v1	3227273	Contig	PRJNA787214	SAMN24491965	2955	2823	45	Enterococcus	99.15	0.55	GCF_022048965.1	South Korea	Homo sapiens
GCF_022836415.1	ASM2283641v1	3219294	Contig	PRJDB12956	SAMD00441893	3128	3008	60	Enterococcus	99.15	0.06	GCF_022836415.1	absent	absent
GCF_028317585.1	ASM2831758v1	3031484	Scaffold	PRJNA880610	SAMN31322302	2786	2691	33	Enterococcus	99.15	0.06	GCF_028317585.1	USA	Homo sapiens
GCF_028317595.1	ASM2831759v1	3282844	Scaffold	PRJNA880610	SAMN31322300	3039	2919	69	Enterococcus	99.15	0.55	GCF_028317595.1	USA	Homo sapiens
GCF_033141225.1	ASM3314122v1	3212486	Contig	PRJNA932152	SAMN33169525	2991	2875	51	Enterococcus	99.15	0.16	GCF_033141225.1	China	duck
GCF_037002805.1	ASM3700280v1	3267821	Contig	PRJNA1071333	SAMN39684244	3008	2901	36	Enterococcus	99.15	0.06	GCF_037002805.1	India	absent
GCF_039752135.1	ASM3975213v1	3118898	Scaffold	PRJNA1093465	SAMN41372031	2924	2833	52	Enterococcus	99.15	0.16	GCF_039752135.1	USA	Homo sapiens
GCF_039752155.1	ASM3975215v1	3142459	Scaffold	PRJNA1093465	SAMN41372032	2962	2849	60	Enterococcus	99.15	0.43	GCF_039752155.1	USA	Homo sapiens
GCF_039752175.1	ASM3975217v1	3125994	Scaffold	PRJNA1093465	SAMN41372029	2964	2855	52	Enterococcus	99.15	0.16	GCF_039752175.1	USA	Homo sapiens
GCF_039752195.1	ASM3975219v1	3121526	Scaffold	PRJNA1093465	SAMN41372030	2930	2836	53	Enterococcus	99.15	0.16	GCF_039752195.1	USA	Homo sapiens
GCF_039752215.1	ASM3975221v1	3121944	Scaffold	PRJNA1093465	SAMN41372028	2929	2838	48	Enterococcus	99.15	0.16	GCF_039752215.1	USA	Homo sapiens
GCF_039837675.1	ASM3983767v1	3178612	Scaffold	PRJNA880610	SAMN31322301	2959	2822	86	Enterococcus	98.52	0.64	GCF_039837675.1	USA	Homo sapiens
GCF_040150775.1	ASM4015077v1	3076552	Contig	PRJNA1091569	SAMN40597887	2946	2845	41	Enterococcus	98.76	0.06	GCF_040150775.1	Cameroon	Homo sapiens
GCF_040430785.1	ASM4043078v1	3277746	Scaffold	PRJNA1127820	SAMN42020710	3232	3078	81	Enterococcus	99.15	0.24	GCF_040430785.1	China	Chinese francolin
GCF_900114755.1	IMG-taxon 2606217799 annotated assembly	3245556	Scaffold	PRJEB17478	SAMN04487758	3026	2925	52	Enterococcus	98.16	0.45	GCF_900114755.1	absent	absent
GCF_900447995.1	46514_F01	3449019	Contig	PRJEB6403	SAMEA53327668	3221	3078	53	Enterococcus	98.76	0.45	GCF_900447995.1	absent	absent
GCF_902164745.1	25426_7#354	3308712	Contig	PRJEB22252	SAMEA104567743	3076	2935	55	Enterococcus	99.15	0.55	GCF_902164745.1	absent	absent
GCF_902387675.1	UHGG_MGYG-HGUT-02493	3325234	Scaffold	PRJEB33885	SAMEA5851998	3233	3076	80	Enterococcus	98.76	0.06	GCF_902387675.1	absent	absent
GCF_931972305.1	P2005	3106613	Complete Genome	PRJEB51090	SAMEA13094920	2848	2698	65	Enterococcus	99.02	1.32	GCF_931972305.1	absent	absent

## Sheet: L_agilis
Assembly Accession	Assembly Name	Assembly Stats Total Sequence Length (pb)	Assembly Level	Assembly BioProject Accession	Assembly BioSample Accession	Annotation Count Gene Total	Annotation Count Gene Protein-coding	Annotation Count Gene Pseudogene	CheckM marker set	CheckM completeness	CheckM contamination	Country	Isolation source
GCF_001243975.1	Lactobacillus agilis	2134779	Scaffold	PRJEB9399	SAMEA3393060	2133	2003	30	Lactobacillaceae	97.06	0.98	France	Homo sapiens
GCF_001436215.1	ASM143621v1	2058058	Scaffold	PRJNA222257	SAMN02369373	2112	1970	61	Lactobacillaceae	98.37	0.98	China	absent
GCF_002218575.1	ASM221857v1	2187818	Scaffold	PRJNA312549	SAMN04498971	2265	2084	83	Lactobacillaceae	98.37	1.42	USA	Meleagris gallopavo
GCF_002218605.1	ASM221860v1	2188485	Scaffold	PRJNA312549	SAMN04498970	2264	2102	70	Lactobacillaceae	98.37	1.42	USA	Meleagris gallopavo
GCF_002218725.1	ASM221872v1	2189062	Scaffold	PRJNA312549	SAMN04498972	2251	2090	69	Lactobacillaceae	98.37	1.42	USA	Meleagris gallopavo
GCF_002237855.1	ASM223785v1	2186265	Scaffold	PRJNA312549	SAMN04498965	2280	2095	86	Lactobacillaceae	98.37	1.42	USA	Meleagris gallopavo
GCF_002237865.1	ASM223786v1	2189711	Scaffold	PRJNA312549	SAMN04498968	2276	2088	92	Lactobacillaceae	98.37	1.42	USA	Meleagris gallopavo
GCF_002237875.1	ASM223787v1	2195988	Scaffold	PRJNA312549	SAMN04498967	2281	2105	82	Lactobacillaceae	98.37	1.42	USA	Meleagris gallopavo
GCF_002237885.1	ASM223788v1	2191745	Scaffold	PRJNA312549	SAMN04498966	2256	2095	72	Lactobacillaceae	98.37	1.42	USA	Meleagris gallopavo
GCF_002237935.1	ASM223793v1	2210870	Scaffold	PRJNA312549	SAMN04498969	2299	2108	88	Lactobacillaceae	98.37	1.53	USA	Meleagris gallopavo
GCF_002240375.2	ASM224037v2	2205859	Complete Genome	PRJNA336089	SAMN05504077	2244	2085	42	Lactobacillaceae	98.37	1.14	Australia	Gallus gallus
GCF_002848175.1	ASM284817v1	2166308	Contig	PRJNA423148	SAMN08211919	2139	2032	42	Lactobacillaceae	97.71	1.91	Denmark	Gallus gallus
GCF_002848195.1	ASM284819v1	2138099	Contig	PRJNA423155	SAMN08211926	2118	1997	45	Lactobacillaceae	98.37	1.91	Denmark	Gallus gallus
GCF_012027835.1	ASM1202783v1	2090135	Contig	PRJNA524186	SAMN11022472	2042	1954	34	Lactobacillaceae	98.37	0.33	USA	Gallus gallus
GCF_012489555.1	ASM1248955v1	2524354	Contig	PRJDB8824	SAMD00189828	2645	2458	85	Lactobacillaceae	98.37	1.61	Japan	Tapirus terrestris
GCF_012489675.1	ASM1248967v1	2258084	Contig	PRJDB8824	SAMD00189829	2302	2145	55	Lactobacillaceae	98.23	0.65	Japan	Meleagris sp.
GCF_012489825.1	ASM1248982v1	2137178	Contig	PRJDB8824	SAMD00189830	2160	2011	46	Lactobacillaceae	98.35	0.65	Japan	Simia sciureus
GCF_012489865.1	ASM1248986v1	2253382	Contig	PRJDB8824	SAMD00189831	2360	2216	48	Lactobacillaceae	98.35	0.71	Japan	Eulemur fulvus
GCF_012490005.1	ASM1249000v1	2113821	Contig	PRJDB8824	SAMD00189832	2215	2030	85	Lactobacillaceae	98.35	1.2	Japan	Gallus gallus
GCF_012490125.1	ASM1249012v1	2033535	Contig	PRJDB8824	SAMD00189833	2104	1963	46	Lactobacillaceae	98.35	0.98	Japan	Equus ferus
GCF_012490225.1	ASM1249022v1	2212130	Contig	PRJDB8824	SAMD00189834	2219	2074	40	Lactobacillaceae	97.69	0.33	Japan	Gallus gallus
GCF_012843665.1	ASM1284366v1	2204013	Contig	PRJNA561470	SAMN14558265	2216	2104	44	Lactobacillaceae	98.37	0.71	Germany	Sus scrofa
GCF_014893475.1	ASM1489347v1	2239969	Contig	PRJNA667793	SAMN16383752	2264	2120	38	Lactobacillaceae	98.37	0.33	USA	Bos taurus
GCF_016742775.1	ASM1674277v1	2342156	Scaffold	PRJNA685183	SAMN17079224	2361	2215	57	Lactobacillaceae	98.37	1.58	Canada	Gallus gallus
GCF_016900275.1	ASM1690027v1	2172358	Contig	PRJNA377666	SAMN14913621	2176	2038	35	Lactobacillaceae	98.37	1.63	Czech Republic	Gallus gallus
GCF_016900285.1	ASM1690028v1	2197849	Contig	PRJNA377666	SAMN14913622	2242	2096	59	Lactobacillaceae	98.37	0.65	Czech Republic	Gallus gallus
GCF_020743235.1	ASM2074323v1	1778556	Contig	PRJNA543206	SAMN21194363	1782	1690	43	Lactobacillaceae	97.33	0.33	China	Gallus gallus
GCF_022642225.1	ASM2264222v1	2071091	Chromosome	PRJNA609246	SAMN14239245	2078	1974	32	Lactobacillaceae	98.37	0.87	Canada	Bos taurus
GCF_022643045.1	ASM2264304v1	2063576	Chromosome	PRJNA609246	SAMN14239242	2067	1957	33	Lactobacillaceae	97.06	0.87	Canada	Bos taurus
GCF_022768165.1	ASM2276816v1	2098303	Contig	PRJNA629856	SAMN26525365	2093	2010	57	Lactobacillaceae	90.26	0.96	Canada	Sus scrofa
GCF_025311455.1	ASM2531145v1	2168186	Complete Genome	PRJNA880300	SAMN30836879	2146	2005	24	Lactobacillaceae	98.37	0.44	USA	Gallus gallus
GCF_025311475.1	ASM2531147v1	2162388	Complete Genome	PRJNA880302	SAMN30837123	2145	2006	22	Lactobacillaceae	98.37	0.44	USA	Gallus gallus
GCF_027674925.1	ASM2767492v1	1966660	Scaffold	PRJNA903559	SAMN31808925	1964	1868	57	Lactobacillaceae	98.37	0.33	China	Homo sapiens
GCF_027674985.1	ASM2767498v1	1963821	Scaffold	PRJNA903559	SAMN31808920	1976	1886	59	Lactobacillaceae	98.37	0.33	China	Homo sapiens
GCF_027675035.1	ASM2767503v1	1949635	Scaffold	PRJNA903559	SAMN31808917	1945	1850	54	Lactobacillaceae	98.37	0.33	China	Homo sapiens
GCF_027675105.1	ASM2767510v1	1994480	Scaffold	PRJNA903559	SAMN31808916	2016	1924	57	Lactobacillaceae	98.37	0.33	China	Homo sapiens
GCF_027723985.1	ASM2772398v1	1985235	Scaffold	PRJNA903559	SAMN31808769	2013	1879	67	Lactobacillaceae	98.37	0.33	China	Homo sapiens
GCF_027724045.1	ASM2772404v1	1965708	Scaffold	PRJNA903559	SAMN31808770	1977	1883	56	Lactobacillaceae	98.37	0.33	China	Homo sapiens
GCF_030215265.1	ASM3021526v1	2033448	Contig	PRJNA970254	SAMN34996575	2030	1914	67	Lactobacillaceae	98.37	0.33	USA	Homo sapiens
GCF_030373825.1	ASM3037382v1	2225272	Contig	PRJNA377666	SAMN34359389	2201	2091	55	Lactobacillaceae	98.37	1.53	Czech Republic	Gallus gallus
GCF_041081355.1	ASM4108135v1	2166317	Complete Genome	PRJNA1137370	SAMN42585951	2154	2008	29	Lactobacillaceae	97.71	0.33	China	Bos taurus
GCF_902386685.1	UHGG_MGYG-HGUT-02390	2134779	Scaffold	PRJEB33885	SAMEA5851894	2133	2002	31	Lactobacillaceae	97.06	0.98	absent	Homo sapiens
GCF_910578315.1	MGBC111495	1908595	Scaffold	PRJEB45234	SAMEA8805210	1915	1843	43	Lactobacillaceae	93.61	0.33	USA	Mus sp.
GCF_944325915.1	BRZ_FR__bin8	2007959	Contig	PRJEB53581	SAMEA110134611	2000	1909	44	Lactobacillaceae	98.2	0.89	France	Gallus gallus
GCF_949299605.1	A107_L4_350350_idba_bin.140	2115186	Contig	PRJEB57055	SAMEA112663171	2113	2006	40	Lactobacillaceae	97.48	0.33	Ethiopia	Gallus gallus
GCF_949399295.1	extra-SRR6032585.9_1677799240	1853690	Contig	PRJEB32890	SAMEA112728559	1974	1871	78	Lactobacillaceae	92.1	0.88	Germany	Mus sp.
GCF_951800395.1	MGG27417_1680015517	1896567	Contig	PRJNA390686	SAMEA112936600	1877	1835	23	Lactobacillaceae	95.97	0.33	Italy	Mus sp.
GCF_958350145.1	ERR10960888_bin.4_MetaWRAP_v1.3_MAG	1891329	Contig	PRJEB62839	SAMEA114061426	1839	1776	17	Lactobacillaceae	98.15	0.65	Kenya	Homo sapiens
GCF_963926755.1	metabat2_coassembly_bwa.324_MAG	1801818	Contig	PRJEB64517	SAMEA115146225	1799	1715	45	Lactobacillaceae	96.41	0.35	UK	Gallus gallus

## Sheet: L_reuteri
Assembly Accession	Assembly Name	Assembly Stats Total Sequence Length (pb)	Assembly Level	Assembly BioProject Accession	Assembly BioSample Accession	Annotation Count Gene Total	Annotation Count Gene Protein-coding	Annotation Count Gene Pseudogene	CheckM marker set	CheckM completeness	CheckM contamination	Country	Isolation source
GCF_001705505.1	ASM170550v1	2151063	Contig	PRJNA337947	SAMN05514174	2145	1977	55	Lactobacillus reuteri	98.19	0.4	USA	Gallus gallus
GCF_002112245.1	ASM211224v1	1952049	Scaffold	PRJNA380292	SAMN06640222	2033	1830	124	Lactobacillus reuteri	97.88	2.76	USA	Gallus gallus
GCF_002156605.1	ASM215660v1	2148567	Scaffold	PRJNA376205	SAMN06364940	2151	2020	43	Lactobacillus reuteri	97.44	0.91	USA	Mus musculus
GCF_003053005.1	ASM305300v1	2102335	Contig	PRJNA336518	SAMN05942019	2156	2017	54	Lactobacillus reuteri	98.45	1.88	USA	Homo sapiens
GCF_003061685.1	ASM306168v1	1977819	Contig	PRJNA336518	SAMN05942021	2071	1915	75	Lactobacillus reuteri	98.1	0.72	USA	Homo sapiens
GCF_003061745.1	ASM306174v1	1956319	Contig	PRJNA336518	SAMN05942020	2039	1904	68	Lactobacillus reuteri	98.1	0.72	USA	Homo sapiens
GCF_003064585.1	ASM306458v1	2031050	Contig	PRJNA336518	SAMN06464108	2105	1891	124	Lactobacillus reuteri	97.5	0.9	USA	Homo sapiens
GCF_003065345.1	ASM306534v1	2032246	Contig	PRJNA336518	SAMN05942022	2103	1898	115	Lactobacillus reuteri	97.59	0.9	USA	Homo sapiens
GCF_004349655.1	ASM434965v1	1887942	Scaffold	PRJNA512876	SAMN10689995	1957	1833	62	Lactobacillus reuteri	97.98	0.72	USA	Homo sapiens
GCF_004349685.1	ASM434968v1	2066995	Scaffold	PRJNA512876	SAMN10689994	2195	2078	57	Lactobacillus reuteri	98.49	0.78	USA	Homo sapiens
GCF_004684995.1	ASM468499v1	2290627	Scaffold	PRJNA482000	SAMN11294217	2261	2160	21	Lactobacillus reuteri	98.55	3.98	USA	Mus musculus
GCF_007633215.1	ASM763321v1	2384717	Complete Genome	PRJNA554696	SAMN12280509	2326	2188	46	Lactobacillus reuteri	97.5	4.81	USA	Peromyscus leucopus
GCF_014145445.1	ASM1414544v1	2095508	Scaffold	PRJNA649652	SAMN15676324	2274	2007	162	Lactobacillus reuteri	98.58	2.03	USA	Argus pheasant
GCF_014336805.1	ASM1433680v1	2645022	Contig	PRJNA480810	SAMN09650462	2999	2623	299	Lactobacillus reuteri	98.09	17.55	USA	chicken
GCF_015552675.1	ASM1555267v1	1969949	Scaffold	PRJNA637878	SAMN15532756	1993	1856	94	Lactobacillus reuteri	98.94	0.21	USA	Homo sapiens
GCF_020784195.1	ASM2078419v1	2278083	Scaffold	PRJNA771229	SAMN22258667	2252	2130	33	Lactobacillus reuteri	98.21	3.52	USA	Black Howler Monkey
GCF_020784205.1	ASM2078420v1	1885319	Scaffold	PRJNA771229	SAMN22258666	1940	1792	58	Lactobacillus reuteri	95.26	1.13	USA	Agile Gibbon
GCF_020784315.1	ASM2078431v1	1940814	Scaffold	PRJNA771229	SAMN22258669	2107	1850	160	Lactobacillus reuteri	96.95	1.79	USA	Orangutan
GCF_020784355.1	ASM2078435v1	2406580	Scaffold	PRJNA771229	SAMN22258659	2459	2327	36	Lactobacillus reuteri	98.55	4.53	USA	Springhaas
GCF_020784395.1	ASM2078439v1	2443006	Scaffold	PRJNA771229	SAMN22258661	2510	2377	36	Lactobacillus reuteri	98.55	4.49	USA	Springhaas
GCF_020784415.1	ASM2078441v1	2408098	Scaffold	PRJNA771229	SAMN22258660	2457	2327	34	Lactobacillus reuteri	98.64	4.53	USA	Springhaas
GCF_020784715.1	ASM2078471v1	1968618	Scaffold	PRJNA771229	SAMN22258642	2045	1879	85	Lactobacillus reuteri	95.53	1.72	USA	Orangutan
GCF_020784775.1	ASM2078477v1	1970355	Scaffold	PRJNA771229	SAMN22258640	2141	1882	159	Lactobacillus reuteri	95.44	1.72	USA	Orangutan
GCF_020784805.1	ASM2078480v1	2159483	Scaffold	PRJNA771229	SAMN22258636	2082	1963	28	Lactobacillus reuteri	99.12	3.82	USA	Patas monkey
GCF_020784875.1	ASM2078487v1	2162028	Scaffold	PRJNA771229	SAMN22258635	2092	1971	28	Lactobacillus reuteri	99.12	3.82	USA	Patas monkey
GCF_020784895.1	ASM2078489v1	2188188	Scaffold	PRJNA771229	SAMN22258634	2175	2062	25	Lactobacillus reuteri	98.37	2.03	USA	Patas monkey
GCF_020784915.1	ASM2078491v1	2142387	Scaffold	PRJNA771229	SAMN22258633	2179	2021	71	Lactobacillus reuteri	98.53	1.13	USA	Mandrill
GCF_020784935.1	ASM2078493v1	2143373	Scaffold	PRJNA771229	SAMN22258632	2195	2029	74	Lactobacillus reuteri	98.53	1.13	USA	Mandrill
GCF_020785015.1	ASM2078501v1	2186597	Scaffold	PRJNA771229	SAMN22258627	2161	2052	22	Lactobacillus reuteri	98.37	2	USA	Lion-tailed Macaque
GCF_020785025.1	ASM2078502v1	1959137	Scaffold	PRJNA771229	SAMN22258628	2031	1867	83	Lactobacillus reuteri	95.44	1.72	USA	Sulawesi Macaque
GCF_020785035.1	ASM2078503v1	2368786	Scaffold	PRJNA771229	SAMN22258626	2404	2283	31	Lactobacillus reuteri	98.04	4.56	USA	Lion-tailed Macaque
GCF_020785075.1	ASM2078507v1	1981382	Scaffold	PRJNA771229	SAMN22258624	2126	1869	171	Lactobacillus reuteri	95.26	1.29	USA	Gorilla
GCF_020785095.1	ASM2078509v1	2279358	Scaffold	PRJNA771229	SAMN22258625	2214	2105	18	Lactobacillus reuteri	98.55	2.2	USA	Lion-tailed Macaque
GCF_020785115.1	ASM2078511v1	2099280	Scaffold	PRJNA771229	SAMN22258621	2016	1886	38	Lactobacillus reuteri	98.45	2.58	USA	Black Howler Monkey
GCF_020785135.1	ASM2078513v1	2199526	Scaffold	PRJNA771229	SAMN22258622	2159	2032	42	Lactobacillus reuteri	98.12	3.83	USA	Black Howler Monkey
GCF_020785145.1	ASM2078514v1	2299377	Scaffold	PRJNA771229	SAMN22258623	2350	2210	36	Lactobacillus reuteri	98.55	2.87	USA	Black Howler Monkey
GCF_020785175.1	ASM2078517v1	1986227	Scaffold	PRJNA771229	SAMN22258619	2123	1897	128	Lactobacillus reuteri	95.44	1.72	USA	Agile Gibbon
GCF_020785185.1	ASM2078518v1	1949897	Scaffold	PRJNA771229	SAMN22258620	2025	1862	82	Lactobacillus reuteri	95.44	1.72	USA	Agile Gibbon
GCF_020785305.1	ASM2078530v1	1985603	Scaffold	PRJNA771229	SAMN22258618	2150	1895	154	Lactobacillus reuteri	95.53	1.72	USA	Agile Gibbon
GCF_020785575.1	ASM2078557v1	1931817	Scaffold	PRJNA771229	SAMN22258599	2026	1861	83	Lactobacillus reuteri	98.64	1.04	USA	Homo sapiens
GCF_020785585.1	ASM2078558v1	1948738	Contig	PRJNA771229	SAMN22258598	2032	1862	89	Lactobacillus reuteri	97.62	0.72	USA	Homo sapiens
GCF_020785665.1	ASM2078566v1	2111735	Scaffold	PRJNA771229	SAMN22258594	2235	2007	136	Lactobacillus reuteri	98.28	0.21	USA	turkey
GCF_020785675.1	ASM2078567v1	2508041	Scaffold	PRJNA771229	SAMN22258593	2784	2443	235	Lactobacillus reuteri	95.96	3.54	USA	turkey
GCF_020785755.1	ASM2078575v1	2259276	Contig	PRJNA771229	SAMN22258589	2447	2192	155	Lactobacillus reuteri	96.28	1.19	USA	Quail
GCF_020785765.1	ASM2078576v1	2258013	Scaffold	PRJNA771229	SAMN22258591	2381	2186	116	Lactobacillus reuteri	96.28	1.19	USA	Quail
GCF_020785795.1	ASM2078579v1	2254387	Scaffold	PRJNA771229	SAMN22258590	2379	2180	120	Lactobacillus reuteri	96.28	1.19	USA	Quail
GCF_020785835.1	ASM2078583v1	2248202	Scaffold	PRJNA771229	SAMN22258587	2381	2185	117	Lactobacillus reuteri	95.83	1.64	USA	Golden pheasant
GCF_020785855.1	ASM2078585v1	2265847	Scaffold	PRJNA771229	SAMN22258585	2456	2207	156	Lactobacillus reuteri	95.83	1.64	USA	Golden pheasant
GCF_020785865.1	ASM2078586v1	2248224	Scaffold	PRJNA771229	SAMN22258586	2391	2190	120	Lactobacillus reuteri	96.28	1.64	USA	Golden pheasant
GCF_020785895.1	ASM2078589v1	2113700	Scaffold	PRJNA771229	SAMN22258584	2325	2067	170	Lactobacillus reuteri	95.43	1.05	USA	Francolin
GCF_020785915.1	ASM2078591v1	2127990	Contig	PRJNA771229	SAMN22258582	2333	2068	176	Lactobacillus reuteri	95.43	1.05	USA	Francolin
GCF_020785975.1	ASM2078597v1	2101571	Scaffold	PRJNA771229	SAMN22258579	2268	1999	166	Lactobacillus reuteri	98.58	2.03	USA	Argus Pheasent
GCF_020785995.1	ASM2078599v1	2285474	Scaffold	PRJNA771229	SAMN22258583	2501	2234	178	Lactobacillus reuteri	95.43	2.83	USA	Francolin
GCF_020786015.1	ASM2078601v1	2095508	Scaffold	PRJNA771229	SAMN22258578	2273	2007	161	Lactobacillus reuteri	98.58	2.03	USA	Argus Pheasent
GCF_020786095.1	ASM2078609v1	2234554	Scaffold	PRJNA771229	SAMN22258577	2466	2154	202	Lactobacillus reuteri	97.5	0.94	USA	Argus Pheasent
GCF_022511545.1	ASM2251154v1	2090281	Contig	PRJNA702134	SAMN17925715	2039	1908	47	Lactobacillus reuteri	98.45	1.1	USA	Mus musculus
GCF_025369755.1	ASM2536975v1	2346013	Complete Genome	PRJNA880297	SAMN30836479	2377	2203	84	Lactobacillus reuteri	96.55	1.61	USA	Gallus gallus
GCF_030226325.1	ASM3022632v1	2166252	Contig	PRJNA970254	SAMN34998689	2094	1986	33	Lactobacillus reuteri	96.97	3.93	USA	Homo sapiens
GCF_033570435.1	ASM3357043v1	2148242	Complete Genome	PRJNA1024413	SAMN37691133	2077	1948	38	Lactobacillus reuteri	98.28	0.4	USA	Gallus gallus
GCF_034744995.1	ASM3474499v1	2359385	Scaffold	PRJNA1054199	SAMN38912203	2582	2332	150	Lactobacillus reuteri	96.66	2.54	USA	calf
GCF_034745005.1	ASM3474500v1	2295189	Scaffold	PRJNA1054199	SAMN38912201	2486	2251	132	Lactobacillus reuteri	95.73	1.26	USA	calf
GCF_034745035.1	ASM3474503v1	2287259	Contig	PRJNA1054199	SAMN38912202	2529	2231	199	Lactobacillus reuteri	96.64	1.31	USA	calf
GCF_034745055.1	ASM3474505v1	2475000	Contig	PRJNA1054199	SAMN38912200	2719	2477	142	Lactobacillus reuteri	97.83	2.57	USA	calf
GCF_034745075.1	ASM3474507v1	2383361	Contig	PRJNA1054199	SAMN38912199	2629	2369	155	Lactobacillus reuteri	97.92	2.7	USA	calf
GCF_034745095.1	ASM3474509v1	2479789	Contig	PRJNA1054199	SAMN38912198	2722	2471	149	Lactobacillus reuteri	97.83	2.69	USA	calf
GCF_034745115.1	ASM3474511v1	2246013	Contig	PRJNA1054199	SAMN38912197	2430	2216	123	Lactobacillus reuteri	95.82	1.17	USA	calf
GCF_034745135.1	ASM3474513v1	2276693	Scaffold	PRJNA1054199	SAMN38912196	2542	2272	175	Lactobacillus reuteri	97.16	1.75	USA	calf
GCF_034745155.1	ASM3474515v1	2354574	Contig	PRJNA1054199	SAMN38912195	2611	2296	215	Lactobacillus reuteri	96.64	2.48	USA	calf
GCF_034745175.1	ASM3474517v1	2337436	Contig	PRJNA1054199	SAMN38912194	2581	2288	204	Lactobacillus reuteri	96.66	1.7	USA	calf
GCF_034745195.1	ASM3474519v1	2391601	Scaffold	PRJNA1054199	SAMN38912193	2599	2366	143	Lactobacillus reuteri	97.92	2.72	USA	calf
GCF_034745215.1	ASM3474521v1	2294918	Contig	PRJNA1054199	SAMN38912192	2534	2246	202	Lactobacillus reuteri	96.01	1.63	USA	calf
GCF_034745245.1	ASM3474524v1	2358684	Contig	PRJNA1054199	SAMN38912190	2601	2346	161	Lactobacillus reuteri	96.75	2.39	USA	calf
GCF_034745275.1	ASM3474527v1	2315939	Scaffold	PRJNA1054199	SAMN38912191	2574	2310	169	Lactobacillus reuteri	96.57	2.92	USA	calf
GCF_034745295.1	ASM3474529v1	2346874	Scaffold	PRJNA1054199	SAMN38912189	2565	2325	148	Lactobacillus reuteri	96.75	2.39	USA	calf
GCF_034745315.1	ASM3474531v1	2338888	Contig	PRJNA1054199	SAMN38912188	2583	2285	201	Lactobacillus reuteri	96.55	1.09	USA	calf
GCF_034745335.1	ASM3474533v1	2372776	Contig	PRJNA1054199	SAMN38912185	2671	2368	195	Lactobacillus reuteri	97.46	4.03	USA	calf
GCF_034745355.1	ASM3474535v1	2293401	Contig	PRJNA1054199	SAMN38912187	2563	2240	224	Lactobacillus reuteri	96.64	1.46	USA	calf
GCF_034745375.1	ASM3474537v1	2277506	Scaffold	PRJNA1054199	SAMN38912186	2534	2268	170	Lactobacillus reuteri	96.69	2.86	USA	calf
GCF_034745395.1	ASM3474539v1	2314411	Contig	PRJNA1054199	SAMN38912183	2652	2286	269	Lactobacillus reuteri	95.97	1.53	USA	calf
GCF_034745415.1	ASM3474541v1	2352582	Scaffold	PRJNA1054199	SAMN38912184	2578	2337	149	Lactobacillus reuteri	96.75	2.55	USA	calf
GCF_034745435.1	ASM3474543v1	2364474	Scaffold	PRJNA1054199	SAMN38912182	2590	2336	160	Lactobacillus reuteri	96.75	2.45	USA	calf
GCF_040785065.1	ASM4078506v1	1955998	Scaffold	PRJNA1104609	SAMN41082104	2041	1884	83	Lactobacillus reuteri	96.1	1.35	USA	absent
GCF_910574215.1	MGBC000067	2170642	Scaffold	PRJEB45232	SAMEA8801307	2166	2015	51	Lactobacillus reuteri	96.9	0.91	USA	absent
GCF_910574795.1	MGBC000117	2177009	Scaffold	PRJEB45232	SAMEA8801351	2187	2026	55	Lactobacillus reuteri	97.44	0.91	USA	absent
GCF_910576155.1	MGBC000225	2179531	Scaffold	PRJEB45232	SAMEA8801457	2199	2031	72	Lactobacillus reuteri	97.23	0.91	USA	absent
GCF_002253765.1	ASM225376v1	2197888	Scaffold	PRJNA384810	SAMN06848397	2264	2094	88	Lactobacillus reuteri	98.46	1.31	United Kingdom	mouse
GCF_002253785.1	ASM225378v1	2191129	Scaffold	PRJNA384810	SAMN06848396	2260	2091	83	Lactobacillus reuteri	98.46	1.62	United Kingdom	mouse
GCF_002253875.1	ASM225387v1	2197567	Scaffold	PRJNA384810	SAMN06848395	2266	2094	88	Lactobacillus reuteri	98.46	1.38	United Kingdom	mouse
GCF_002253905.1	ASM225390v1	2192953	Scaffold	PRJNA384810	SAMN06848391	2251	2087	80	Lactobacillus reuteri	98.46	1.31	United Kingdom	mouse
GCF_002253945.1	ASM225394v1	2200917	Scaffold	PRJNA384810	SAMN06848390	2270	2093	90	Lactobacillus reuteri	98.46	1.31	United Kingdom	mouse
GCF_002253965.1	ASM225396v1	2180980	Scaffold	PRJNA384810	SAMN06848388	2237	2070	79	Lactobacillus reuteri	98.46	1.31	United Kingdom	mouse
GCF_002253975.1	ASM225397v1	2182710	Scaffold	PRJNA384810	SAMN06848389	2247	2088	76	Lactobacillus reuteri	98.46	1.31	United Kingdom	mouse
GCF_002254025.1	ASM225402v1	2188010	Scaffold	PRJNA384810	SAMN06848383	2258	2100	73	Lactobacillus reuteri	98.46	1.31	United Kingdom	mouse
GCF_002254045.1	ASM225404v1	2164817	Scaffold	PRJNA384810	SAMN06848382	2219	2041	101	Lactobacillus reuteri	97.49	0.73	United Kingdom	mouse
GCF_002254085.1	ASM225408v1	2183914	Scaffold	PRJNA384810	SAMN06848380	2221	2040	101	Lactobacillus reuteri	97.49	0.71	United Kingdom	mouse
GCF_002254095.1	ASM225409v1	2166741	Scaffold	PRJNA384810	SAMN06848384	2209	2027	110	Lactobacillus reuteri	96.95	0.74	United Kingdom	mouse
GCF_002254105.1	ASM225410v1	2191073	Scaffold	PRJNA384810	SAMN06848381	2230	2045	107	Lactobacillus reuteri	96.95	0.68	United Kingdom	mouse
GCF_002254115.1	ASM225411v1	2193880	Scaffold	PRJNA384810	SAMN06848379	2244	2050	111	Lactobacillus reuteri	97.4	0.71	United Kingdom	mouse
GCF_002254165.1	ASM225416v1	2182231	Scaffold	PRJNA384810	SAMN06848377	2222	2039	102	Lactobacillus reuteri	97.49	0.68	United Kingdom	mouse
GCF_002254175.1	ASM225417v1	2175738	Scaffold	PRJNA384810	SAMN06848378	2226	2038	104	Lactobacillus reuteri	96.95	0.68	United Kingdom	mouse
GCF_002254185.1	ASM225418v1	2191465	Scaffold	PRJNA384810	SAMN06848376	2253	2091	82	Lactobacillus reuteri	98.46	1.31	United Kingdom	mouse
GCF_002254195.1	ASM225419v1	2190973	Scaffold	PRJNA384810	SAMN06848375	2268	2094	92	Lactobacillus reuteri	98.46	1.31	United Kingdom	mouse
GCF_002254245.1	ASM225424v1	2170962	Scaffold	PRJNA384810	SAMN06848374	2247	2086	83	Lactobacillus reuteri	98.24	1.31	United Kingdom	mouse
GCF_002254255.1	ASM225425v1	2216642	Scaffold	PRJNA384810	SAMN06848373	2290	2113	91	Lactobacillus reuteri	98.46	2.96	United Kingdom	mouse
GCF_020412465.1	ASM2041246v1	1947772	Complete Genome	PRJNA767643	SAMN21920643	1937	1781	66	Lactobacillus reuteri	97.06	1.19	United Kingdom	Sus scrofa
GCF_020412485.1	ASM2041248v1	1947745	Complete Genome	PRJNA767639	SAMN21920642	1940	1784	66	Lactobacillus reuteri	97.06	1.19	United Kingdom	Sus scrofa
GCF_003046055.1	ASM304605v1	1986363	Scaffold	PRJNA445879	SAMN08801721	2022	1865	85	Lactobacillus reuteri	97.27	0.47	Turkey	absent
GCF_003046135.1	ASM304613v1	1987473	Contig	PRJNA445879	SAMN08801720	2031	1870	87	Lactobacillus reuteri	97.59	0.47	Turkey	absent
GCF_037966725.1	ASM3796672v1	2006568	Scaffold	PRJNA1092961	SAMN40643421	2158	1962	118	Lactobacillus reuteri	97.79	1.2	Turkey	Homo sapiens
GCF_001688685.2	ASM168868v2	2044771	Complete Genome	PRJNA317592	SAMN04621617	1973	1833	49	Lactobacillus reuteri	96.77	1.19	Switzerland	Mus musculus
GCF_002221655.1	ASM222165v1	2063604	Contig	PRJNA289613	SAMN03854115	2000	1856	53	Lactobacillus reuteri	96.68	1.37	Switzerland	Mus musculus
GCF_009389015.1	ASM938901v1	2092540	Scaffold	PRJNA473635	SAMN09280125	2190	1978	140	Lactobacillus reuteri	96.96	4.03	Switzerland	chicken
GCF_009389035.1	ASM938903v1	2076455	Scaffold	PRJNA473635	SAMN09280126	2181	1981	129	Lactobacillus reuteri	96.47	0.94	Switzerland	chicken
GCF_009389105.1	ASM938910v1	2089150	Scaffold	PRJNA473635	SAMN09280124	2158	1973	125	Lactobacillus reuteri	96.82	0.92	Switzerland	chicken
GCF_009389155.1	ASM938915v1	2047745	Scaffold	PRJNA473635	SAMN09280120	2081	1917	110	Lactobacillus reuteri	96.82	0.92	Switzerland	chicken
GCF_009389165.1	ASM938916v1	2045990	Scaffold	PRJNA473635	SAMN09280122	2116	1917	130	Lactobacillus reuteri	99.15	2.14	Switzerland	chicken
GCF_009389205.1	ASM938920v1	2039104	Scaffold	PRJNA473635	SAMN09280119	2089	1917	102	Lactobacillus reuteri	97.59	1.13	Switzerland	chicken
GCF_009389215.1	ASM938921v1	2111250	Scaffold	PRJNA473635	SAMN09280118	2228	2064	101	Lactobacillus reuteri	97.99	1.79	Switzerland	chicken
GCF_009389245.1	ASM938924v1	2020736	Scaffold	PRJNA473635	SAMN09280115	2057	1880	104	Lactobacillus reuteri	96.69	1.68	Switzerland	chicken
GCF_009389255.1	ASM938925v1	1934301	Scaffold	PRJNA473635	SAMN09280117	1993	1826	97	Lactobacillus reuteri	95.95	0.46	Switzerland	chicken
GCF_009389285.1	ASM938928v1	2083200	Scaffold	PRJNA473635	SAMN09280116	2165	1992	105	Lactobacillus reuteri	98.7	2.57	Switzerland	chicken
GCF_009389305.1	ASM938930v1	2050775	Scaffold	PRJNA473635	SAMN09280114	2115	1968	74	Lactobacillus reuteri	97.05	1.78	Switzerland	chicken
GCF_009389325.1	ASM938932v1	2036693	Scaffold	PRJNA473635	SAMN09280113	2116	1948	95	Lactobacillus reuteri	95.07	2.09	Switzerland	chicken
GCF_009389335.1	ASM938933v1	2033677	Scaffold	PRJNA473635	SAMN09280112	2073	1900	109	Lactobacillus reuteri	97.06	1.27	Switzerland	chicken
GCF_009389365.1	ASM938936v1	2037347	Scaffold	PRJNA473635	SAMN09280110	2075	1923	81	Lactobacillus reuteri	95.39	1.08	Switzerland	chicken
GCF_009389375.1	ASM938937v1	2125410	Scaffold	PRJNA473635	SAMN09280111	2214	2037	108	Lactobacillus reuteri	97.58	1.66	Switzerland	chicken
GCF_009389385.1	ASM938938v1	1996584	Scaffold	PRJNA473635	SAMN09280109	2039	1889	92	Lactobacillus reuteri	95.77	1.2	Switzerland	chicken
GCF_009389435.1	ASM938943v1	1997870	Scaffold	PRJNA473635	SAMN09280108	2062	1880	110	Lactobacillus reuteri	96.08	0.96	Switzerland	chicken
GCF_009389465.1	ASM938946v1	2111339	Scaffold	PRJNA473635	SAMN09280106	2163	2003	105	Lactobacillus reuteri	96.09	0.68	Switzerland	chicken
GCF_009389475.1	ASM938947v1	2107014	Scaffold	PRJNA473635	SAMN09280105	2162	2006	96	Lactobacillus reuteri	96.09	0.68	Switzerland	chicken
GCF_020784795.1	ASM2078479v1	2143630	Scaffold	PRJNA771229	SAMN22258639	2322	2022	178	Lactobacillus reuteri	97.97	4.5	Sweden	Monkey
GCF_020785715.1	ASM2078571v1	2071198	Scaffold	PRJNA771229	SAMN22258592	2252	1968	189	Lactobacillus reuteri	95.81	0.92	Sweden	turkey
GCF_002027295.1	ASM202729v1	2333530	Contig	PRJNA377846	SAMN06473517	2480	2202	158	Lactobacillus reuteri	96.39	1.1	Spain	Bos taurus
GCF_001046835.1	ASM104683v1	1993967	Complete Genome	PRJNA276785	SAMN03382532	2028	1880	58	Lactobacillus reuteri	98.1	0.72	South Korea	Homo sapiens
GCF_002128485.1	ASM212848v1	2064983	Contig	PRJNA342243	SAMN05751479	2080	1919	85	Lactobacillus reuteri	96.16	0.96	South Korea	pig
GCF_002128495.1	ASM212849v1	2110569	Contig	PRJNA342243	SAMN05751483	2208	2053	85	Lactobacillus reuteri	97.15	2.29	South Korea	pig
GCF_002128515.1	ASM212851v1	2655130	Contig	PRJNA342243	SAMN05751480	2838	2572	191	Lactobacillus reuteri	98.1	8.33	South Korea	pig
GCF_002128525.1	ASM212852v1	2203689	Contig	PRJNA342243	SAMN05751482	2283	2114	96	Lactobacillus reuteri	96.62	1.02	South Korea	pig
GCF_002128555.1	ASM212855v1	2125717	Contig	PRJNA342243	SAMN05751484	2184	2023	88	Lactobacillus reuteri	96.89	1.32	South Korea	pig
GCF_002128585.1	ASM212858v1	2083281	Contig	PRJNA342243	SAMN05751485	2140	1994	78	Lactobacillus reuteri	96.76	1.14	South Korea	pig
GCF_002128605.1	ASM212860v1	1976816	Contig	PRJNA342243	SAMN05751489	2006	1864	70	Lactobacillus reuteri	96.22	1.85	South Korea	pig
GCF_002128615.1	ASM212861v1	1986395	Contig	PRJNA342243	SAMN05751492	2071	1907	94	Lactobacillus reuteri	95.94	0.87	South Korea	pig
GCF_002128635.1	ASM212863v1	1970315	Contig	PRJNA342243	SAMN05751493	2037	1879	87	Lactobacillus reuteri	95.38	1.19	South Korea	pig
GCF_002128655.1	ASM212865v1	1996237	Contig	PRJNA342243	SAMN05751494	2026	1878	78	Lactobacillus reuteri	96.85	1.78	South Korea	pig
GCF_002128685.1	ASM212868v1	2276963	Contig	PRJNA342243	SAMN05751495	2313	2144	98	Lactobacillus reuteri	97.38	2.57	South Korea	pig
GCF_002128705.1	ASM212870v1	2140185	Contig	PRJNA342243	SAMN05751497	2234	2085	75	Lactobacillus reuteri	98.17	2.45	South Korea	pig
GCF_002128745.1	ASM212874v1	1975108	Contig	PRJNA342243	SAMN05751490	1997	1856	71	Lactobacillus reuteri	96.85	1.85	South Korea	pig
GCF_002128755.1	ASM212875v1	1907452	Contig	PRJNA342243	SAMN05751488	1917	1792	51	Lactobacillus reuteri	95.04	1.24	South Korea	pig
GCF_002128765.1	ASM212876v1	2372183	Contig	PRJNA342243	SAMN05751496	2499	2298	131	Lactobacillus reuteri	97.83	2.62	South Korea	pig
GCF_003316895.1	ASM331689v1	2244514	Complete Genome	PRJNA427254	SAMN08225762	2161	2006	63	Lactobacillus reuteri	96.98	1.91	South Korea	Mus musculus
GCF_003316935.1	ASM331693v1	2259968	Complete Genome	PRJNA473291	SAMN09270376	2164	2010	64	Lactobacillus reuteri	97.43	1.91	South Korea	Gallus gallus
GCF_004208615.1	ASM420861v1	2041516	Complete Genome	PRJNA521452	SAMN10888479	2095	1947	58	Lactobacillus reuteri	97.69	0.72	South Korea	Homo sapiens
GCF_013348825.1	ASM1334882v1	2162818	Complete Genome	PRJNA637956	SAMN15162791	2165	2007	67	Lactobacillus reuteri	97.15	1.52	South Korea	Sus scrofa domesticus
GCF_021383585.1	ASM2138358v1	1986363	Complete Genome	PRJNA721851	SAMN18740304	2062	1920	55	Lactobacillus reuteri	97.47	0.72	South Korea	absent
GCF_021398615.1	ASM2139861v1	2243237	Complete Genome	PRJNA791146	SAMN24255923	2224	2010	124	Lactobacillus reuteri	97.54	0.21	South Korea	Homo sapiens
GCF_023078415.1	ASM2307841v1	1972516	Complete Genome	PRJNA826716	SAMN27578393	2036	1901	53	Lactobacillus reuteri	97.02	0.72	South Korea	absent
GCF_025515425.1	ASM2551542v1	2244109	Contig	PRJNA882664	SAMN30948365	2275	2088	96	Lactobacillus reuteri	96.88	2.02	South Korea	absent
GCF_026183435.1	ASM2618343v1	1996211	Complete Genome	PRJNA897749	SAMN31580343	1984	1833	61	Lactobacillus reuteri	96.12	1.1	South Korea	absent
GCF_028656195.1	ASM2865619v1	2159049	Contig	PRJNA932480	SAMN33195121	2163	1994	79	Lactobacillus reuteri	97.23	0.9	South Korea	Bos taurus
GCF_028656225.1	ASM2865622v1	2206089	Contig	PRJNA932482	SAMN33195124	2215	2044	80	Lactobacillus reuteri	98.04	2.4	South Korea	Bos taurus
GCF_028656265.1	ASM2865626v1	2151824	Contig	PRJNA932056	SAMN33144386	2162	1992	80	Lactobacillus reuteri	97.07	0.9	South Korea	Bos taurus
GCF_028656315.1	ASM2865631v1	2167327	Contig	PRJNA932060	SAMN33144407	2170	1982	98	Lactobacillus reuteri	99.12	1.49	South Korea	Bos taurus
GCF_028656325.1	ASM2865632v1	2157807	Contig	PRJNA932058	SAMN33144399	2162	1992	80	Lactobacillus reuteri	97.25	0.9	South Korea	Bos taurus
GCF_028656395.1	ASM2865639v1	2093158	Contig	PRJNA932064	SAMN33145128	2093	1931	71	Lactobacillus reuteri	97.5	3.25	South Korea	Bos taurus
GCF_037414455.1	ASM3741445v1	2222926	Complete Genome	PRJNA1083277	SAMN40277747	2204	2015	99	Lactobacillus reuteri	98.85	0.21	South Korea	Homo sapiens
GCF_040959015.1	ASM4095901v1	1943662	Complete Genome	PRJNA1137532	SAMN42606284	2012	1874	51	Lactobacillus reuteri	95.4	0.72	South Korea	Homo sapiens
GCF_002112195.1	ASM211219v1	2035662	Scaffold	PRJNA380292	SAMN06640219	2170	1919	184	Lactobacillus reuteri	98.94	0.21	South Africa	Homo sapiens
GCF_034424825.1	ASM3442482v1	2079303	Scaffold	PRJNA1050914	SAMN38757438	2133	2016	63	Lactobacillus reuteri	96.22	3.36	South Africa	Sus scrofa domesticus
GCF_019061135.1	ASM1906113v1	1902828	Contig	PRJNA700517	SAMN17833190	1966	1858	39	Lactobacillus reuteri	95.78	1.1	Slovakia	Ovis aries
GCF_002007085.2	ASM200708v2	2160630	Complete Genome	PRJNA373841	SAMN06315550	2123	1942	90	Lactobacillus reuteri	97.74	1.18	Russia	Homo sapiens
GCF_018966925.1	ASM1896692v1	2053706	Contig	PRJNA736961	SAMN19670539	2248	1928	237	Lactobacillus reuteri	97.68	0.16	Russia	Homo sapiens
GCF_023896335.1	ASM2389633v1	1860159	Scaffold	PRJNA835408	SAMN28100809	1949	1812	65	Lactobacillus reuteri	97.02	1.3	Russia	absent
GCF_020785255.1	ASM2078525v1	2158974	Scaffold	PRJNA771229	SAMN22258614	2077	1977	13	Lactobacillus reuteri	98.64	4.24	Papua New Guinea	Homo sapiens
GCF_020785295.1	ASM2078529v1	2053563	Scaffold	PRJNA771229	SAMN22258613	2220	1977	141	Lactobacillus reuteri	96.51	1.19	Papua New Guinea	Homo sapiens
GCF_020785325.1	ASM2078532v1	2158995	Scaffold	PRJNA771229	SAMN22258612	2078	1978	13	Lactobacillus reuteri	98.64	4.24	Papua New Guinea	Homo sapiens
GCF_020785335.1	ASM2078533v1	2230458	Scaffold	PRJNA771229	SAMN22258611	2184	2060	27	Lactobacillus reuteri	98.64	7.34	Papua New Guinea	Homo sapiens
GCF_020785355.1	ASM2078535v1	2158617	Scaffold	PRJNA771229	SAMN22258610	2078	1977	14	Lactobacillus reuteri	98.55	4.24	Papua New Guinea	Homo sapiens
GCF_020785415.1	ASM2078541v1	2159046	Scaffold	PRJNA771229	SAMN22258609	2084	1983	14	Lactobacillus reuteri	98.55	4.24	Papua New Guinea	Homo sapiens
GCF_020785475.1	ASM2078547v1	2154690	Scaffold	PRJNA771229	SAMN22258608	2064	1974	13	Lactobacillus reuteri	98.64	4.24	Papua New Guinea	Homo sapiens
GCF_022509245.1	ASM2250924v1	2273479	Scaffold	PRJNA744373	SAMN20114178	2381	2169	128	Lactobacillus reuteri	98.12	1.37	Pakistan	absent
GCF_000159455.2	ASM15945v2	2316838	Complete Genome	PRJNA30643	SAMN00001494	2323	2122	110	Lactobacillus reuteri	98.32	0.21	not determined	absent
GCF_000159475.2	ASM15947v2	2067914	Contig	PRJNA31511	SAMN00001504	2162	1981	65	Lactobacillus reuteri	98.01	0.72	not determined	absent
GCF_000159615.1	ASM15961v1	2107903	Scaffold	PRJNA31553	SAMN00001503	2150	1975	103	Lactobacillus reuteri	98.93	0.29	not determined	absent
GCF_000160715.1	ASM16071v1	2015721	Scaffold	PRJNA34627	SAMN00002242	2058	1917	70	Lactobacillus reuteri	98.1	0.72	not determined	absent
GCF_002112805.1	ASM211280v1	2152944	Scaffold	PRJNA380292	SAMN06640223	2284	2033	182	Lactobacillus reuteri	97	0.21	not available	Homo sapiens
GCF_012275185.1	ASM1227518v1	2072001	Chromosome	PRJNA603203	SAMN13923556	2170	1959	135	Lactobacillus reuteri	96.78	1.01	Nigeria	free-range chicken
GCF_013694365.1	ASM1369436v1	2085667	Complete Genome	PRJNA626394	SAMN14639341	2533	2210	228	Lactobacillus reuteri	97.4	1.73	Nigeria	chicken
GCF_001889975.1	ASM188997v1	2302234	Contig	PRJNA344848	SAMN05788099	2271	2077	100	Lactobacillus reuteri	98.28	2.6	Netherlands	pig
GCF_040961095.1	ASM4096109v1	2039512	Complete Genome	PRJNA1138931	SAMN42748060	2097	1947	60	Lactobacillus reuteri	98.1	0.72	na	Homo sapiens
GCF_040962025.1	ASM4096202v1	2039512	Complete Genome	PRJNA1138928	SAMN42748000	2097	1947	60	Lactobacillus reuteri	98.1	0.72	na	Homo sapiens
GCF_002112225.1	ASM211222v1	2313528	Scaffold	PRJNA380292	SAMN06640220	2517	2340	88	Lactobacillus reuteri	97.9	1.75	Japan	Gallus gallus
GCF_020784275.1	ASM2078427v1	2169144	Scaffold	PRJNA771229	SAMN22258664	2266	2050	114	Lactobacillus reuteri	97.31	0.87	Japan	Mouse
GCF_020784295.1	ASM2078429v1	2094037	Scaffold	PRJNA771229	SAMN22258662	2195	2013	74	Lactobacillus reuteri	96.97	0.35	Japan	Mouse
GCF_020784305.1	ASM2078430v1	2168211	Scaffold	PRJNA771229	SAMN22258663	2308	2123	78	Lactobacillus reuteri	96.88	0.35	Japan	Mouse
GCF_020785435.1	ASM2078543v1	2175005	Scaffold	PRJNA771229	SAMN22258606	2482	2112	248	Lactobacillus reuteri	98.31	0.21	Japan	Homo sapiens
GCF_020785495.1	ASM2078549v1	2011223	Scaffold	PRJNA771229	SAMN22258607	2171	1977	92	Lactobacillus reuteri	98.1	0.72	Japan	Homo sapiens
GCF_020785505.1	ASM2078550v1	2105774	Scaffold	PRJNA771229	SAMN22258603	2317	2070	139	Lactobacillus reuteri	98.46	0.51	Japan	Homo sapiens
GCF_020785535.1	ASM2078553v1	2048929	Scaffold	PRJNA771229	SAMN22258602	2236	2001	127	Lactobacillus reuteri	98.37	0.36	Japan	Homo sapiens
GCF_011065435.1	ASM1106543v1	2016419	Contig	PRJNA577397	SAMN13025177	2105	1929	93	Lactobacillus reuteri	98.49	1.74	Italy	Homo sapiens
GCF_025189785.1	ASM2518978v1	2031791	Contig	PRJNA503586	SAMN10365492	2071	1933	62	Lactobacillus reuteri	98.39	0.79	Italy	absent
GCF_025189805.1	ASM2518980v1	2032430	Contig	PRJNA503586	SAMN10365493	2072	1931	65	Lactobacillus reuteri	98.3	0.79	Italy	absent
GCF_040142685.1	ASM4014268v1	2039406	Complete Genome	PRJNA1071652	SAMN39639085	2090	1933	67	Lactobacillus reuteri	97.43	0.64	Italy	Homo sapiens
GCF_001703855.1	ASM170385v1	2240703	Scaffold	PRJNA328437	SAMN05371093	2320	2129	107	Lactobacillus reuteri	98.12	1.55	Israel	Mus musculus
GCF_001703865.1	ASM170386v1	2255438	Scaffold	PRJNA328440	SAMN05371094	2335	2147	98	Lactobacillus reuteri	97.49	1.55	Israel	Mus musculus
GCF_001703875.1	ASM170387v1	2639195	Scaffold	PRJNA328442	SAMN05371179	2816	2557	163	Lactobacillus reuteri	98.53	6.26	Israel	Mus musculus
GCF_001703885.1	ASM170388v1	2241971	Scaffold	PRJNA328441	SAMN05371178	2356	2142	130	Lactobacillus reuteri	97.49	1.58	Israel	Mus musculus
GCF_001703935.1	ASM170393v1	2273479	Scaffold	PRJNA328444	SAMN05371506	2383	2172	127	Lactobacillus reuteri	98.12	1.37	Israel	Mus musculus
GCF_020785545.1	ASM2078554v1	2227053	Scaffold	PRJNA771229	SAMN22258601	2359	2185	88	Lactobacillus reuteri	96.77	2.47	Ireland	Homo sapiens
GCF_020785595.1	ASM2078559v1	2226973	Scaffold	PRJNA771229	SAMN22258600	2363	2186	91	Lactobacillus reuteri	96.77	2.47	Ireland	Homo sapiens
GCF_002762415.1	ASM276241v1	2011203	Contig	PRJNA417223	SAMN07981098	2046	1856	113	Lactobacillus reuteri	96.97	0.9	India	absent
GCF_003719715.1	ASM371971v1	1821307	Scaffold	PRJNA493554	SAMN10246080	1837	1685	77	Lactobacillus reuteri	97.96	1.1	India	absent
GCF_036430905.1	ASM3643090v1	1871689	Contig	PRJNA932444	SAMN33193073	1904	1788	50	Lactobacillus reuteri	98.34	1.91	Ghana	absent
GCF_036430925.1	ASM3643092v1	1883049	Contig	PRJNA932444	SAMN33193074	1919	1799	54	Lactobacillus reuteri	98.34	2.01	Ghana	absent
GCF_036430965.1	ASM3643096v1	1915575	Contig	PRJNA932444	SAMN33193071	1961	1848	46	Lactobacillus reuteri	98.43	2.06	Ghana	absent
GCF_036430985.1	ASM3643098v1	1915179	Contig	PRJNA932444	SAMN33193075	1960	1844	49	Lactobacillus reuteri	98.34	2.06	Ghana	absent
GCF_036431005.1	ASM3643100v1	1941542	Contig	PRJNA932444	SAMN33193070	1994	1873	50	Lactobacillus reuteri	98.46	1.06	Ghana	absent
GCF_036431025.1	ASM3643102v1	1880361	Contig	PRJNA932444	SAMN33193068	1902	1793	49	Lactobacillus reuteri	96.34	2.05	Ghana	absent
GCF_036431085.1	ASM3643108v1	1919315	Contig	PRJNA932444	SAMN33193067	1960	1844	49	Lactobacillus reuteri	98.43	2.06	Ghana	absent
GCF_036431965.1	ASM3643196v1	1859710	Contig	PRJNA932444	SAMN35624265	1855	1780	41	Lactobacillus reuteri	97.93	0.69	Ghana	absent
GCF_036432135.1	ASM3643213v1	1846752	Scaffold	PRJNA932444	SAMN35624259	1837	1770	38	Lactobacillus reuteri	97.06	0.34	Ghana	absent
GCF_001657495.1	ASM165749v1	1963029	Contig	PRJNA323635	SAMN05182497	2068	1901	79	Lactobacillus reuteri	96.48	0.72	Germany	absent
GCF_012843635.1	ASM1284363v1	2254608	Contig	PRJNA561470	SAMN14558267	2364	2211	82	Lactobacillus reuteri	97.76	2.73	Germany	Sus scrofa domesticus
GCF_020978225.1	ASM2097822v1	2399145	Chromosome	PRJNA675717	SAMN16712075	2497	2316	87	Lactobacillus reuteri	98.63	1.23	Germany	absent
GCF_024622285.1	ASM2462228v1	2050835	Contig	PRJNA856830	SAMN29593145	2056	1926	68	Lactobacillus reuteri	97.84	1.46	Germany	Mus musculus
GCF_024622305.1	ASM2462230v1	2269982	Contig	PRJNA856830	SAMN29593144	2328	2192	63	Lactobacillus reuteri	98.51	1.58	Germany	Mus musculus
GCF_024622315.1	ASM2462231v1	2046379	Contig	PRJNA856830	SAMN29593143	2049	1923	66	Lactobacillus reuteri	97.84	1.73	Germany	Mus musculus
GCF_028462605.1	ASM2846260v1	2201984	Contig	PRJNA926949	SAMN32886977	2321	2189	61	Lactobacillus reuteri	97.93	0.86	Germany	absent
GCF_028462705.1	ASM2846270v1	1940057	Contig	PRJNA926949	SAMN32886982	2012	1883	59	Lactobacillus reuteri	97.74	0.72	Germany	absent
GCF_002253625.1	ASM225362v1	2147812	Scaffold	PRJNA384810	SAMN06848403	2233	2064	88	Lactobacillus reuteri	97.44	1.64	France	mouse
GCF_002253665.1	ASM225366v1	2067228	Scaffold	PRJNA384810	SAMN06848404	2089	1929	81	Lactobacillus reuteri	98.3	0.96	France	mouse
GCF_002253685.1	ASM225368v1	2143488	Scaffold	PRJNA384810	SAMN06848402	2239	2060	93	Lactobacillus reuteri	97.44	1.92	France	mouse
GCF_002253705.1	ASM225370v1	2079917	Scaffold	PRJNA384810	SAMN06848401	2104	1937	85	Lactobacillus reuteri	98.3	1.23	France	mouse
GCF_002253725.1	ASM225372v1	2186996	Scaffold	PRJNA384810	SAMN06848399	2315	2129	100	Lactobacillus reuteri	97.44	1.82	France	mouse
GCF_002253745.1	ASM225374v1	2157107	Scaffold	PRJNA384810	SAMN06848400	2257	2081	94	Lactobacillus reuteri	97.4	1.77	France	mouse
GCF_002253825.1	ASM225382v1	2179964	Scaffold	PRJNA384810	SAMN06848393	2251	2081	91	Lactobacillus reuteri	98.12	1.79	France	mouse
GCF_002253835.1	ASM225383v1	2205242	Scaffold	PRJNA384810	SAMN06848392	2290	2124	80	Lactobacillus reuteri	97.44	2.3	France	mouse
GCF_002253865.1	ASM225386v1	2223192	Scaffold	PRJNA384810	SAMN06848394	2310	2139	84	Lactobacillus reuteri	97.44	2.26	France	mouse
GCF_002253925.1	ASM225392v1	2264211	Scaffold	PRJNA384810	SAMN06848387	2405	2210	97	Lactobacillus reuteri	98.28	1.66	France	mouse
GCF_002253955.1	ASM225395v1	2266929	Scaffold	PRJNA384810	SAMN06848386	2404	2214	94	Lactobacillus reuteri	98.39	1.96	France	mouse
GCF_002254035.1	ASM225403v1	2246191	Scaffold	PRJNA384810	SAMN06848385	2384	2195	99	Lactobacillus reuteri	98.39	1.55	France	mouse
GCF_010206285.1	ASM1020628v1	2014210	Contig	PRJNA551571	SAMN12158248	2027	1848	88	Lactobacillus reuteri	96.91	1.32	France	Mus musculus
GCF_016697045.1	ASM1669704v1	2063624	Chromosome	PRJNA680355	SAMN16911574	1998	1854	53	Lactobacillus reuteri	96.68	1.37	France	Mus musculus
GCF_025189665.1	ASM2518966v1	2001057	Contig	PRJNA503586	SAMN10365499	2005	1890	56	Lactobacillus reuteri	97.56	0.89	France	absent
GCF_025189725.1	ASM2518972v1	2131241	Contig	PRJNA503586	SAMN10365496	2223	2083	85	Lactobacillus reuteri	97.83	1.01	France	absent
GCF_025189745.1	ASM2518974v1	1928630	Contig	PRJNA503586	SAMN10365495	1976	1842	81	Lactobacillus reuteri	97.56	1.59	France	absent
GCF_025189765.1	ASM2518976v1	1945694	Contig	PRJNA503586	SAMN10365494	2035	1886	72	Lactobacillus reuteri	96.28	1.41	France	absent
GCF_030262475.1	ASM3026247v1	2100168	Contig	PRJNA980144	SAMN35621297	2007	1912	22	Lactobacillus reuteri	97.53	2.46	France	absent
GCF_020785395.1	ASM2078539v1	2073192	Scaffold	PRJNA771229	SAMN22258605	2196	1978	126	Lactobacillus reuteri	96.58	0.21	Finland	Homo sapiens
GCF_020785455.1	ASM2078545v1	2112897	Scaffold	PRJNA771229	SAMN22258604	2238	2010	136	Lactobacillus reuteri	98.4	0.39	Finland	Homo sapiens
GCF_030418275.1	ASM3041827v1	2096828	Contig	PRJNA943682	SAMN33733576	2178	2014	73	Lactobacillus reuteri	98.04	1.99	Finland	Homo sapiens
GCF_009733615.2	ASM973361v2	2282869	Contig	PRJNA580514	SAMN13161586	2210	2131	25	Lactobacillus reuteri	98.07	4.46	Ecuador	Mus musculus
GCF_009733645.1	ASM973364v1	2260332	Contig	PRJNA580514	SAMN13161645	2190	2107	27	Lactobacillus reuteri	98.07	4.46	Ecuador	Mus musculus
GCF_009733655.1	ASM973365v1	2281145	Contig	PRJNA580514	SAMN13161644	2227	2132	29	Lactobacillus reuteri	97.94	4.46	Ecuador	Mus musculus
GCF_002112185.1	ASM211218v1	2062915	Scaffold	PRJNA380292	SAMN06640221	2174	1987	115	Lactobacillus reuteri	98.17	2.29	Denmark	Gallus gallus
GCF_001618905.1	ASM161890v1	2234097	Complete Genome	PRJNA290298	SAMN03879966	2231	2075	66	Lactobacillus reuteri	97.06	1.31	China	pig
GCF_003072625.1	ASM307262v1	2044184	Complete Genome	PRJNA431039	SAMN08382659	2063	1808	165	Lactobacillus reuteri	95.56	0.62	China	absent
GCF_003174815.1	ASM317481v1	2470207	Scaffold	PRJNA472230	SAMN08934322	3036	2617	319	Lactobacillus reuteri	98.14	4.86	China	horse
GCF_003174855.1	ASM317485v1	2166445	Scaffold	PRJNA472230	SAMN08934317	2322	2149	80	Lactobacillus reuteri	98.01	1.94	China	cow
GCF_003174865.1	ASM317486v1	2303268	Scaffold	PRJNA472230	SAMN08934316	2446	2276	86	Lactobacillus reuteri	97.36	2.45	China	sheep
GCF_003174875.1	ASM317487v1	2255884	Scaffold	PRJNA472230	SAMN08934315	2445	2245	105	Lactobacillus reuteri	97.99	1.14	China	sheep
GCF_003174915.1	ASM317491v1	2205694	Scaffold	PRJNA472230	SAMN08934321	2470	2220	156	Lactobacillus reuteri	98.05	2.96	China	horse
GCF_003174935.1	ASM317493v1	2300219	Scaffold	PRJNA472230	SAMN08934310	2492	2333	73	Lactobacillus reuteri	97.96	2.21	China	goat
GCF_003174945.1	ASM317494v1	2365331	Scaffold	PRJNA472230	SAMN08934320	2539	2384	71	Lactobacillus reuteri	98.55	3.54	China	cow
GCF_003174955.1	ASM317495v1	2251273	Scaffold	PRJNA472230	SAMN08934312	2405	2261	64	Lactobacillus reuteri	98.55	3.41	China	goat
GCF_003174995.1	ASM317499v1	2365809	Scaffold	PRJNA472230	SAMN08934311	2550	2389	72	Lactobacillus reuteri	98.55	3.27	China	goat
GCF_003175015.1	ASM317501v1	2367543	Scaffold	PRJNA472230	SAMN08934309	2554	2395	70	Lactobacillus reuteri	98.55	3.54	China	goat
GCF_003175025.1	ASM317502v1	2202319	Scaffold	PRJNA472230	SAMN08934323	2358	2203	79	Lactobacillus reuteri	98.28	0.9	China	horse
GCF_003175075.1	ASM317507v1	2441700	Scaffold	PRJNA472230	SAMN08934318	2808	2529	180	Lactobacillus reuteri	98.59	3.54	China	cow
GCF_003175125.1	ASM317512v1	2255596	Scaffold	PRJNA472230	SAMN08934308	2409	2257	68	Lactobacillus reuteri	98.55	3.41	China	goat
GCF_003413665.1	ASM341366v1	1910900	Contig	PRJNA483868	SAMN09748305	1971	1826	82	Lactobacillus reuteri	95.18	1.45	China	piglet
GCF_006874665.1	ASM687466v1	2151788	Complete Genome	PRJNA476683	SAMN09453118	2186	2030	65	Lactobacillus reuteri	97.02	1.64	China	absent
GCF_012971015.1	ASM1297101v1	1946071	Scaffold	PRJNA553012	SAMN12254898	2018	1846	109	Lactobacillus reuteri	95.08	0.94	China	absent
GCF_015377805.1	ASM1537780v1	2038911	Complete Genome	PRJNA579198	SAMN13106284	2090	1946	54	Lactobacillus reuteri	98.1	0.72	China	absent
GCF_018884225.1	ASM1888422v1	2439358	Complete Genome	PRJNA682320	SAMN16987598	2465	2278	87	Lactobacillus reuteri	96.99	2.07	China	Yak
GCF_018917025.1	ASM1891702v1	1960393	Contig	PRJNA733006	SAMN19374067	1980	1807	103	Lactobacillus reuteri	96.99	0.96	China	Macaca fascicularis
GCF_019336465.1	ASM1933646v1	2355017	Scaffold	PRJNA747123	SAMN20256385	2378	2247	38	Lactobacillus reuteri	98.57	1.76	China	Homo sapiens
GCF_021165875.1	ASM2116587v1	2040678	Complete Genome	PRJNA785080	SAMN23526821	2091	1946	55	Lactobacillus reuteri	98.1	0.72	China	absent
GCF_021228055.1	ASM2122805v1	2041530	Complete Genome	PRJNA785010	SAMN23525688	2091	1949	52	Lactobacillus reuteri	98.1	0.72	China	absent
GCF_021459965.1	ASM2145996v1	2229645	Complete Genome	PRJNA789472	SAMN24114820	2205	2012	103	Lactobacillus reuteri	98.13	0.21	China	Homo sapiens
GCF_024652885.1	ASM2465288v1	2391204	Complete Genome	PRJNA747123	SAMN30113476	2385	2251	33	Lactobacillus reuteri	98.57	1.76	China	Homo sapiens
GCF_028369155.1	ASM2836915v1	2170046	Contig	PRJNA913094	SAMN32292726	2233	2051	104	Lactobacillus reuteri	97.5	1.79	China	Gallus
GCF_030345055.1	ASM3034505v1	2281552	Complete Genome	PRJNA983529	SAMN35728319	2272	2139	42	Lactobacillus reuteri	97.91	1.34	China	mice
GCF_030517815.1	ASM3051781v1	2255551	Complete Genome	PRJNA994435	SAMN36427126	2298	2137	68	Lactobacillus reuteri	96.96	2.68	China	Homo sapiens
GCF_030585585.1	ASM3058558v1	2111986	Complete Genome	PRJNA766345	SAMN21843240	2092	1917	85	Lactobacillus reuteri	97.59	0.9	China	Homo sapiens
GCF_033181025.1	ASM3318102v1	2090361	Contig	PRJNA872372	SAMN30465350	2168	2017	73	Lactobacillus reuteri	98.55	1.57	China	bovine
GCF_035200785.1	ASM3520078v1	2163646	Complete Genome	PRJNA973010	SAMN35104363	2133	1949	93	Lactobacillus reuteri	97.59	1.26	China	Homo sapiens
GCF_035928175.1	ASM3592817v1	2053710	Complete Genome	PRJNA1064653	SAMN39437308	2107	1962	55	Lactobacillus reuteri	98.1	1.96	China	absent
GCF_036903235.1	ASM3690323v1	2214495	Contig	PRJNA1065120	SAMN39454010	2277	2107	71	Lactobacillus reuteri	97.03	1.42	China	Tibetan pigs
GCF_041226345.1	ASM4122634v1	2040979	Scaffold	PRJNA1091319	SAMN40593493	2024	1898	60	Lactobacillus reuteri	96.78	0.84	China	Mus musculus
GCF_925280345.1	IM842	2199360	Contig	PRJEB49530	SAMEA11998735	2238	2012	137	Lactobacillus reuteri	98.85	0.21	China	Tscherskia triton
GCF_925283095.1	IM110	1932543	Contig	PRJEB49530	SAMEA11998808	2031	1852	100	Lactobacillus reuteri	95.98	1.1	China	Tscherskia triton
GCF_004793875.1	ASM479387v1	2156033	Contig	PRJNA474907	SAMN10878293	2217	2073	72	Lactobacillus reuteri	97.38	2.41	Canada	Mus musculus
GCF_004794115.1	ASM479411v1	2022610	Contig	PRJNA474907	SAMN10878294	2007	1892	44	Lactobacillus reuteri	98.19	0.72	Canada	Mus musculus
GCF_020784255.1	ASM2078425v1	2202969	Contig	PRJNA771229	SAMN22258665	2194	2065	34	Lactobacillus reuteri	97.56	2.32	Canada	Porqupine
GCF_020784375.1	ASM2078437v1	2336059	Scaffold	PRJNA771229	SAMN22258657	2355	2193	45	Lactobacillus reuteri	97.47	1.83	Canada	Rattus norvegicus
GCF_020784435.1	ASM2078443v1	2341205	Scaffold	PRJNA771229	SAMN22258656	2376	2218	49	Lactobacillus reuteri	97.56	1.83	Canada	Rattus norvegicus
GCF_020784455.1	ASM2078445v1	2088818	Scaffold	PRJNA771229	SAMN22258655	2094	1966	36	Lactobacillus reuteri	98.55	2.27	Canada	Rat
GCF_020784465.1	ASM2078446v1	2329924	Scaffold	PRJNA771229	SAMN22258658	2346	2187	41	Lactobacillus reuteri	97.56	1.83	Canada	Rattus norvegicus
GCF_020784495.1	ASM2078449v1	2212475	Scaffold	PRJNA771229	SAMN22258654	2259	2060	91	Lactobacillus reuteri	98.48	0.9	Canada	Rat
GCF_020784515.1	ASM2078451v1	2212274	Scaffold	PRJNA771229	SAMN22258653	2260	2063	89	Lactobacillus reuteri	98.39	0.9	Canada	Rat
GCF_020784525.1	ASM2078452v1	2087278	Scaffold	PRJNA771229	SAMN22258652	2173	1990	84	Lactobacillus reuteri	97.71	0.24	Canada	Marmota
GCF_020784555.1	ASM2078455v1	2190901	Scaffold	PRJNA771229	SAMN22258650	2168	2047	29	Lactobacillus reuteri	98.21	2.97	Canada	Dasyprocta leporina
GCF_020784575.1	ASM2078457v1	2187769	Scaffold	PRJNA771229	SAMN22258649	2168	2052	25	Lactobacillus reuteri	98.21	2.97	Canada	Coendou prehensilis
GCF_020784595.1	ASM2078459v1	2152638	Scaffold	PRJNA771229	SAMN22258648	2150	2034	20	Lactobacillus reuteri	97.81	2.23	Canada	Capy C
GCF_020784605.1	ASM2078460v1	2154134	Scaffold	PRJNA771229	SAMN22258647	2153	2032	24	Lactobacillus reuteri	97.9	2.23	Canada	Capy C
GCF_020784635.1	ASM2078463v1	2175706	Scaffold	PRJNA771229	SAMN22258651	2159	2040	28	Lactobacillus reuteri	98.21	2.97	Canada	Dasyprocta leporina
GCF_020784945.1	ASM2078494v1	1865590	Scaffold	PRJNA771229	SAMN22258631	1963	1770	110	Lactobacillus reuteri	95.35	0.83	Canada	Mandrill
GCF_020784975.1	ASM2078497v1	1977344	Scaffold	PRJNA771229	SAMN22258630	2044	1911	47	Lactobacillus reuteri	95.35	1.37	Canada	Mandrill
GCF_020784995.1	ASM2078499v1	2034469	Scaffold	PRJNA771229	SAMN22258629	2128	1965	85	Lactobacillus reuteri	97.69	2.44	Canada	Mandrill
GCF_020785225.1	ASM2078522v1	1995131	Scaffold	PRJNA771229	SAMN22258616	2122	1911	114	Lactobacillus reuteri	95.26	0.83	Canada	Japanese macaque
GCF_020785275.1	ASM2078527v1	2037432	Scaffold	PRJNA771229	SAMN22258615	2186	1972	116	Lactobacillus reuteri	95.35	0.83	Canada	Japanese macaque
GCF_020785935.1	ASM2078593v1	2182531	Scaffold	PRJNA771229	SAMN22258581	2217	2022	84	Lactobacillus reuteri	97.11	0.69	Canada	Cape teal
GCF_020785945.1	ASM2078594v1	2437899	Scaffold	PRJNA771229	SAMN22258580	2478	2311	49	Lactobacillus reuteri	98.46	2.44	Canada	Cape teal
GCF_020786045.1	ASM2078604v1	2266164	Scaffold	PRJNA771229	SAMN22258576	2501	2211	175	Lactobacillus reuteri	95.09	0.65	Canada	African spoonbiil
GCF_022586935.1	ASM2258693v1	1894273	Contig	PRJNA813581	SAMN26510415	1961	1855	45	Lactobacillus reuteri	96.16	1.63	Canada	absent
GCF_022642805.1	ASM2264280v1	2050876	Chromosome	PRJNA609246	SAMN14239247	2135	1991	79	Lactobacillus reuteri	96.99	0.63	Canada	Bos taurus
GCF_020785815.1	ASM2078581v1	2105171	Scaffold	PRJNA771229	SAMN22258588	2299	2005	194	Lactobacillus reuteri	97.44	0.74	Brazil	Poultry
GCF_000010005.1	ASM1000v1	2039414	Complete Genome	PRJDA19011	SAMD00060920	2090	1941	63	Lactobacillus reuteri	97.97	0.72	absent	absent
GCF_000016825.1	ASM1682v1	1999618	Complete Genome	PRJNA15766	SAMN02598351	2053	1908	56	Lactobacillus reuteri	95.94	0.72	absent	absent
GCF_000168255.1	ASM16825v1	2305557	Contig	PRJNA13431	SAMN00623049	2247	2103	49	Lactobacillus reuteri	97.64	0.3	absent	absent
GCF_000179435.1	ASM17943v1	2018630	Contig	PRJNA50435	SAMN02471903	2042	1894	68	Lactobacillus reuteri	97.74	0.96	absent	rodent
GCF_000179455.1	ASM17945v1	2116621	Contig	PRJNA50437	SAMN02471904	2111	1996	30	Lactobacillus reuteri	97.38	0.83	absent	rodent
GCF_000410995.1	ASM41099v1	2093275	Complete Genome	PRJNA206042	SAMN02603119	2100	1933	76	Lactobacillus reuteri	97.4	1.23	absent	pigs
GCF_000439275.1	ASM43927v1	2145445	Complete Genome	PRJNA211728	SAMN02604178	2044	1921	32	Lactobacillus reuteri	96.46	1.18	absent	absent
GCF_000758185.1	LTH5448	1980298	Contig	PRJNA248653	SAMN02869572	1937	1774	118	Lactobacillus reuteri	90.74	2.18	absent	absent
GCF_001434615.1	ASM143461v1	1935860	Scaffold	PRJNA222257	SAMN02369412	2036	1898	77	Lactobacillus reuteri	97.47	0.72	absent	absent
GCF_002159305.1	ASM215930v1	2280851	Contig	PRJNA377666	SAMN06473750	2408	2199	117	Lactobacillus reuteri	97.64	2.98	absent	Gallus gallus
GCF_002160565.1	ASM216056v1	2248030	Contig	PRJNA377666	SAMN06473632	2360	2158	110	Lactobacillus reuteri	97.55	2.93	absent	Gallus gallus
GCF_002888655.1	ASM288865v1	2232947	Scaffold	PRJEB8323	SAMEA3220431	2316	2158	89	Lactobacillus reuteri	97.93	2.54	absent	absent
GCF_003703875.1	ASM370387v1	2091003	Contig	PRJNA434601	SAMN08565493	2105	1959	61	Lactobacillus reuteri	97.89	1.47	absent	rat
GCF_003703885.1	ASM370388v1	2220255	Contig	PRJNA434601	SAMN08615538	2142	2039	17	Lactobacillus reuteri	98.55	3.93	absent	rat
GCF_007280535.1	ASM728053v1	1961009	Scaffold	PRJNA554836	SAMN12284778	2075	1890	90	Lactobacillus reuteri	96.37	1.32	absent	absent
GCF_009649095.1	ASM964909v1	2101955	Contig	PRJNA587310	SAMN13186406	2060	1932	45	Lactobacillus reuteri	97.23	1.5	absent	rat
GCF_009649105.1	ASM964910v1	2056704	Contig	PRJNA587310	SAMN13186396	2088	1885	120	Lactobacillus reuteri	98.36	2.01	absent	mouse
GCF_009649445.1	ASM964944v1	2066036	Contig	PRJNA587310	SAMN13186400	2013	1893	38	Lactobacillus reuteri	98.37	1.73	absent	mouse
GCF_009649475.1	ASM964947v1	2112985	Contig	PRJNA587310	SAMN13186404	2178	2033	57	Lactobacillus reuteri	97.67	1.28	absent	rat
GCF_009649505.1	ASM964950v1	2171732	Contig	PRJNA587310	SAMN13186399	2129	2011	35	Lactobacillus reuteri	97.89	3.55	absent	rat
GCF_009649535.1	ASM964953v1	2156208	Contig	PRJNA587310	SAMN13186407	2117	2000	34	Lactobacillus reuteri	97.86	3.37	absent	mouse
GCF_009649545.1	ASM964954v1	2119233	Contig	PRJNA587310	SAMN13186401	2072	1945	43	Lactobacillus reuteri	98.49	1.18	absent	mouse
GCF_009649565.1	ASM964956v1	2255506	Contig	PRJNA587310	SAMN13186402	2336	2175	77	Lactobacillus reuteri	96.6	1.3	absent	mouse
GCF_009649595.1	ASM964959v1	2027051	Contig	PRJNA587310	SAMN13186398	2104	1892	126	Lactobacillus reuteri	97.87	1.55	absent	rat
GCF_009649605.1	ASM964960v1	2085822	Contig	PRJNA587310	SAMN13186405	2091	1955	49	Lactobacillus reuteri	98.55	1.61	absent	rat
GCF_009649645.1	ASM964964v1	2143173	Contig	PRJNA587310	SAMN13186397	2138	2008	38	Lactobacillus reuteri	97.38	0.83	absent	mouse
GCF_016900715.1	ASM1690071v1	2139010	Contig	PRJNA377666	SAMN14913601	2365	2069	200	Lactobacillus reuteri	97.48	2.84	absent	Gallus gallus
GCF_020785635.1	ASM2078563v1	2412683	Scaffold	PRJNA771229	SAMN22258596	2611	2354	158	Lactobacillus reuteri	95.79	4.04	absent	Amaru Indians
GCF_020785655.1	ASM2078565v1	2231666	Scaffold	PRJNA771229	SAMN22258595	2279	2122	70	Lactobacillus reuteri	97.77	0.3	absent	Amaru Indians
GCF_020785735.1	ASM2078573v1	2433469	Scaffold	PRJNA771229	SAMN22258597	2702	2383	198	Lactobacillus reuteri	95.79	4.04	absent	Amaru Indians
GCF_025189625.1	ASM2518962v1	2275093	Contig	PRJNA503586	SAMN10365501	2431	2258	87	Lactobacillus reuteri	97.31	1.92	absent	absent
GCF_025189645.1	ASM2518964v1	2272168	Contig	PRJNA503586	SAMN10365500	2429	2254	89	Lactobacillus reuteri	97.28	1.92	absent	absent
GCF_025189695.1	ASM2518969v1	1956071	Contig	PRJNA503586	SAMN10365497	2056	1912	70	Lactobacillus reuteri	98.1	0.72	absent	absent
GCF_036621875.1	Lactobacillus reuteri lp167-67	2015596	Scaffold	PRJEB8323	SAMEA3220430	2064	1926	67	Lactobacillus reuteri	98.23	1.1	absent	absent
GCF_036621895.1	Lactobacillus reuteri 3c6	1934800	Scaffold	PRJEB8323	SAMEA3220432	1965	1812	84	Lactobacillus reuteri	96.43	1.5	absent	absent
GCF_036621915.1	Lactobacillus reuteri pg-3b	1890545	Scaffold	PRJEB8323	SAMEA3220433	1895	1773	50	Lactobacillus reuteri	96.35	2.83	absent	absent
GCF_900093565.1	PRJEB14722	2108374	Scaffold	PRJEB14722	SAMEA4083360	2084	1967	35	Lactobacillus reuteri	96.84	0.83	absent	absent
GCF_901600665.1	PRJEB32461-P4870	2039591	Scaffold	PRJEB32461	SAMEA5606431	1708	1543	92	Lactobacillus reuteri	96.96	0.29	absent	absent
GCF_901600675.1	PRJEB32461-P5461	2039572	Scaffold	PRJEB32461	SAMEA5606434	1776	1577	113	Lactobacillus reuteri	96.87	0.29	absent	absent
GCF_901600695.1	PRJEB32461-P5460	2039540	Scaffold	PRJEB32461	SAMEA5606433	1777	1573	118	Lactobacillus reuteri	96.87	0.29	absent	absent
GCF_901600705.1	PRJEB32461-P4904	2039591	Scaffold	PRJEB32461	SAMEA5606432	1710	1542	95	Lactobacillus reuteri	96.87	0.29	absent	absent
GCF_901971765.1	INIA P572	2113987	Contig	PRJEB32823	SAMEA5674231	2225	2005	115	Lactobacillus reuteri	97.33	3.2	absent	absent
GCF_910574445.1	MGBC000027	2175666	Scaffold	PRJEB45232	SAMEA8801270	2176	2031	48	Lactobacillus reuteri	97.3	0.91	absent	absent
GCF_910574725.1	MGBC000088	2170349	Scaffold	PRJEB45232	SAMEA8801326	2171	2023	48	Lactobacillus reuteri	97.44	0.91	absent	absent
GCF_925285275.1	IM566	2301090	Contig	PRJEB49530	SAMEA12008948	2325	2117	115	Lactobacillus reuteri	98.4	0.21	absent	absent
GCF_940926095.1	AMBV339	1986590	Scaffold	PRJEB52196	SAMEA14093665	2091	1914	94	Lactobacillus reuteri	98.54	1.23	absent	absent
GCF_947381575.1	B031	2000190	Contig	PRJEB56193	SAMEA112150985	2084	1907	86	Lactobacillus reuteri	97.59	0.83	absent	absent
GCF_947381675.1	B010	2184505	Contig	PRJEB56193	SAMEA112150983	2270	2093	91	Lactobacillus reuteri	98.04	1.84	absent	absent
GCF_002128715.1	ASM212871v1	1944677	Contig	PRJNA342243	SAMN05751486	1983	1848	69	Lactobacillus reuteri	93.9	2.25	absent	absent
GCF_002253755.1	ASM225375v1	2159534	Scaffold	PRJNA384810	SAMN06848398	2310	2027	214	Lactobacillus reuteri	92.49	1.68	absent	absent
GCF_003175035.1	ASM317503v1	2151450	Scaffold	PRJNA472230	SAMN08934319	2323	2071	178	Lactobacillus reuteri	92.85	1.81	absent	absent
GCF_003175085.1	ASM317508v1	2138434	Scaffold	PRJNA472230	SAMN08934314	2305	2059	173	Lactobacillus reuteri	92.76	1.81	absent	absent
GCF_003175115.1	ASM317511v1	2139733	Scaffold	PRJNA472230	SAMN08934313	2307	2057	175	Lactobacillus reuteri	92.76	1.81	absent	absent
GCF_009389005.1	ASM938900v1	1998598	Scaffold	PRJNA473635	SAMN09280129	2077	1911	99	Lactobacillus reuteri	94.73	1.64	absent	absent
GCF_009389115.1	ASM938911v1	2041920	Scaffold	PRJNA473635	SAMN09280123	2142	1943	128	Lactobacillus reuteri	94.82	2.34	absent	absent
GCF_009389425.1	ASM938942v1	2017900	Scaffold	PRJNA473635	SAMN09280107	2069	1884	114	Lactobacillus reuteri	94.95	0.59	absent	absent
GCF_011009765.1	ASM1100976v1	1934716	Contig	PRJNA517196	SAMN10822529	1978	1810	85	Lactobacillus reuteri	94.97	0.9	absent	absent
GCF_012970985.1	ASM1297098v1	2041738	Scaffold	PRJNA553012	SAMN12234689	2193	1929	174	Lactobacillus reuteri	93.08	3.6	absent	absent
GCF_012971005.1	ASM1297100v1	2032965	Scaffold	PRJNA553012	SAMN12236241	2137	1927	128	Lactobacillus reuteri	94.77	0.97	absent	absent
GCF_012971025.1	ASM1297102v1	2022741	Scaffold	PRJNA553012	SAMN12234723	2163	1927	163	Lactobacillus reuteri	93.42	3.13	absent	absent
GCF_012971035.1	ASM1297103v1	1919701	Scaffold	PRJNA553012	SAMN12230198	2004	1816	112	Lactobacillus reuteri	93.95	2.62	absent	absent
GCF_012971085.1	ASM1297108v1	1967839	Scaffold	PRJNA553012	SAMN12229721	2073	1870	127	Lactobacillus reuteri	93.88	2.62	absent	absent
GCF_012971095.1	ASM1297109v1	1943711	Scaffold	PRJNA553012	SAMN12229734	2046	1841	129	Lactobacillus reuteri	93.79	2.62	absent	absent
GCF_012971105.1	ASM1297110v1	1983233	Scaffold	PRJNA553012	SAMN12230183	2070	1864	132	Lactobacillus reuteri	93.42	3.13	absent	absent
GCF_012971115.1	ASM1297111v1	1911916	Scaffold	PRJNA553012	SAMN12229720	1986	1815	112	Lactobacillus reuteri	93.88	2.41	absent	absent
GCF_012971125.1	ASM1297112v1	1959986	Scaffold	PRJNA553012	SAMN12229719	2071	1866	126	Lactobacillus reuteri	93.88	2.62	absent	absent
GCF_012971185.1	ASM1297118v1	1924922	Scaffold	PRJNA553012	SAMN12229718	2004	1834	109	Lactobacillus reuteri	93.97	2.3	absent	absent
GCF_013487925.1	ASM1348792v1	2272714	Complete Genome	PRJNA597131	SAMN13624823	2309	2128	90	Lactobacillus reuteri	94.96	0.74	absent	absent
GCF_020023755.1	ASM2002375v1	2076814	Complete Genome	PRJNA740036	SAMN19814905	2108	1896	124	Lactobacillus reuteri	91.74	1.32	absent	absent
GCF_020023775.1	ASM2002377v1	2313802	Complete Genome	PRJNA740036	SAMN19814906	2420	2188	140	Lactobacillus reuteri	92.8	2.5	absent	absent
GCF_020784235.1	ASM2078423v1	2009462	Scaffold	PRJNA771229	SAMN22258668	2146	1981	86	Lactobacillus reuteri	94.7	1.37	absent	absent
GCF_020784835.1	ASM2078483v1	1988886	Scaffold	PRJNA771229	SAMN22258638	2123	1871	162	Lactobacillus reuteri	94.57	0.75	absent	absent
GCF_020784845.1	ASM2078484v1	2018659	Scaffold	PRJNA771229	SAMN22258637	2172	1923	160	Lactobacillus reuteri	94.57	0.75	absent	absent
GCF_020785215.1	ASM2078521v1	2038757	Scaffold	PRJNA771229	SAMN22258617	2183	1978	116	Lactobacillus reuteri	94.72	0.83	absent	absent
GCF_020978285.1	ASM2097828v1	2483413	Chromosome	PRJNA675717	SAMN16712076	2571	2297	179	Lactobacillus reuteri	93.9	2.97	absent	absent
GCF_022509405.1	ASM2250940v1	2151450	Scaffold	PRJNA744373	SAMN20114177	2322	2064	184	Lactobacillus reuteri	93.04	1.81	absent	absent
GCF_028462635.1	ASM2846263v1	1834345	Contig	PRJNA926949	SAMN32886981	1909	1789	50	Lactobacillus reuteri	94.86	0.72	absent	absent
GCF_030721705.1	ASM3072170v1	2280129	Complete Genome	PRJNA995515	SAMN36470972	2218	2021	106	Lactobacillus reuteri	94.95	1.18	absent	absent
GCF_034259105.1	ASM3425910v1	2272649	Complete Genome	PRJNA1040460	SAMN38259820	2266	2034	141	Lactobacillus reuteri	93.93	2.74	absent	absent
GCF_036323925.1	ASM3632392v1	2020909	Contig	PRJNA1068336	SAMN39585552	2042	1900	51	Lactobacillus reuteri	94.99	1.44	absent	absent
GCF_036432025.1	ASM3643202v1	1852458	Scaffold	PRJNA932444	SAMN35624266	1847	1752	61	Lactobacillus reuteri	93.68	5.82	absent	absent
GCF_000236455.2	ASM23645v2	2091243	Complete Genome	PRJEA63411	SAMEA2272605	2088	1918	72				absent	absent
GCF_000712555.1	LTH2584	2066054	Scaffold	PRJNA248653	SAMN02800394	2125	1904	130				absent	absent
GCF_000712565.2	ASM71256v2	1949539	Contig	PRJNA248653	SAMN02869563	1915	1631	237				absent	absent
GCF_000722535.2	ASM72253v2	2032034	Contig	PRJNA248653	SAMN02840984	2025	1831	114				absent	absent
GCF_001756765.1	ASM175676v1	1918862	Contig	PRJNA326063	SAMN05257121	2085	1471	534				absent	absent
GCF_003790365.1	ASM379036v1	2430215	Scaffold	PRJNA504734	SAMN10397676	2566	2213	264				absent	absent
GCF_009184725.1	ASM918472v1	2047619	Complete Genome	PRJNA576342	SAMN12990932	2096	1946	60				absent	absent
GCF_009389025.1	ASM938902v1	2233659	Scaffold	PRJNA473635	SAMN09280128	2446	2029	339				absent	absent
GCF_009389055.1	ASM938905v1	2301158	Scaffold	PRJNA473635	SAMN09280127	2561	2099	385				absent	absent
GCF_009389145.1	ASM938914v1	2388196	Scaffold	PRJNA473635	SAMN09280121	2769	2208	481				absent	absent
GCF_904374755.1	Chicken_14_mag_57	1578768	Scaffold	PRJEB33338	SAMEA7202207	1591	1433	127				absent	absent
GCF_904382455.1	Chicken_19_mag_122	1879458	Scaffold	PRJEB33338	SAMEA7202309	1931	1822	64				absent	absent

## Sheet: L_vaginalis
Assembly Accession	Assembly Name	Assembly Stats Total Sequence Length (pb)	Assembly Level	Assembly BioProject Accession	Assembly BioSample Accession	Annotation Count Gene Total	Annotation Count Gene Protein-coding	Annotation Count Gene Pseudogene	CheckM marker set	CheckM completeness	CheckM contamination	Country	Isolation source
GCF_000159435.1	ASM15943v1	1877332	Scaffold	PRJNA31507	SAMN00001485	1888	1750	70	Lactobacillaceae	99.35	1.11	absent	absent
GCF_001435915.1	ASM143591v1	1787468	Scaffold	PRJNA222257	SAMN02369417	1795	1701	40	Lactobacillaceae	99.35	0.65	absent	Homo sapiens
GCF_003833155.1	ASM383315v1	1879874	Contig	PRJNA504605	SAMN10395645	1954	1776	102	Lactobacillaceae	99.25	0.76	Italy	Homo sapiens
GCF_009362935.1	ASM936293v1	1894710	Complete Genome	PRJNA566211	SAMN12784813	1888	1744	64	Lactobacillaceae	97.29	0.65	absent	absent
GCF_020743255.1	ASM2074325v1	1563151	Contig	PRJNA543206	SAMN21194338	1534	1449	49	Lactobacillaceae	96.1		China	Gallus gallus
GCF_022456455.1	ASM2245645v1	1496624	Scaffold	PRJNA799634	SAMN25207564	1455	1403	22	Lactobacillaceae	94.12	0.65	absent	absent
GCF_022456495.1	ASM2245649v1	1657171	Scaffold	PRJNA799634	SAMN25207563	1701	1562	104	Lactobacillaceae	97.13	1.46	South Africa	Homo sapiens
GCF_022456515.1	ASM2245651v1	1697396	Scaffold	PRJNA799634	SAMN25207560	1682	1590	40	Lactobacillaceae	98.6	0.65	South Africa	Homo sapiens
GCF_022457745.1	ASM2245774v1	1394550	Scaffold	PRJNA799634	SAMN25207565	1411	1260	119	Lactobacillaceae	80.89	0.78	absent	absent
GCF_022457835.1	ASM2245783v1	1135852	Scaffold	PRJNA799634	SAMN25207571	1072	1003	44	Lactobacillaceae	61.49	0.65	absent	absent
GCF_022457975.1	ASM2245797v1	843285	Scaffold	PRJNA799634	SAMN25207575	857	789	36	Lactobacillaceae	55.23		absent	absent
GCF_022756045.1	ASM2275604v1	1732606	Scaffold	PRJNA799762	SAMN25208438	1810	1698	76	Lactobacillaceae	97.86	1.33	USA	Homo sapiens
GCF_022775235.1	ASM2277523v1	1804495	Contig	PRJNA629856	SAMN26525932	1849	1722	58	Lactobacillaceae	98.04		Canada	Sus scrofa domesticus
GCF_025311515.1	ASM2531151v1	1883554	Complete Genome	PRJNA880306	SAMN30837134	1843	1731	33	Lactobacillaceae	99.25		USA	Gallus gallus
GCF_025677785.1	ASM2567778v1	1779643	Complete Genome	PRJNA872822	SAMN30470964	1734	1617	38	Lactobacillaceae	99.35		China	Homo sapiens
GCF_026935945.1	ASM2693594v1	1844314	Scaffold	PRJNA784112	SAMN23470199	1815	1687	49	Lactobacillaceae	99.35		Brazil	Homo sapiens
GCF_027154405.1	ASM2715440v1	1914531	Contig	PRJNA797778	SAMN25045861	1966	1841	52	Lactobacillaceae	99.35		USA	Homo sapiens
GCF_027156105.1	ASM2715610v1	1818782	Contig	PRJNA797778	SAMN25045814	1835	1714	53	Lactobacillaceae	99.35	0.65	USA	Homo sapiens
GCF_027156125.1	ASM2715612v1	1819260	Contig	PRJNA797778	SAMN25045813	1840	1717	52	Lactobacillaceae	99.35	0.65	USA	Homo sapiens
GCF_027156145.1	ASM2715614v1	1819356	Contig	PRJNA797778	SAMN25045815	1844	1723	52	Lactobacillaceae	99.23	0.65	USA	Homo sapiens
GCF_027156165.1	ASM2715616v1	1824871	Contig	PRJNA797778	SAMN25045812	1849	1724	52	Lactobacillaceae	99.35	0.65	USA	Homo sapiens
GCF_027156185.1	ASM2715618v1	1825099	Contig	PRJNA797778	SAMN25045811	1847	1723	51	Lactobacillaceae	99.35	0.65	USA	Homo sapiens
GCF_027156205.1	ASM2715620v1	1825239	Contig	PRJNA797778	SAMN25045809	1847	1723	52	Lactobacillaceae	99.35	0.65	USA	Homo sapiens
GCF_027156215.1	ASM2715621v1	1826523	Contig	PRJNA797778	SAMN25045810	1848	1725	51	Lactobacillaceae	99.35	0.65	USA	Homo sapiens
GCF_027156305.1	ASM2715630v1	1825520	Contig	PRJNA797778	SAMN25045803	1843	1720	51	Lactobacillaceae	99.35	0.65	USA	Homo sapiens
GCF_027156545.1	ASM2715654v1	1925034	Contig	PRJNA797778	SAMN25045793	1936	1810	53	Lactobacillaceae	99.35	0.65	USA	Homo sapiens
GCF_027156605.1	ASM2715660v1	1819080	Contig	PRJNA797778	SAMN25045789	1833	1720	46	Lactobacillaceae	99.35	0.65	USA	Homo sapiens
GCF_027156625.1	ASM2715662v1	1819235	Contig	PRJNA797778	SAMN25045787	1833	1718	48	Lactobacillaceae	99.35	0.65	USA	Homo sapiens
GCF_027156665.1	ASM2715666v1	1818657	Contig	PRJNA797778	SAMN25045786	1833	1717	48	Lactobacillaceae	99.35	0.65	USA	Homo sapiens
GCF_027156685.1	ASM2715668v1	1818487	Contig	PRJNA797778	SAMN25045785	1836	1724	45	Lactobacillaceae	99.35	0.65	USA	Homo sapiens
GCF_027156755.1	ASM2715675v1	1819141	Contig	PRJNA797778	SAMN25045788	1840	1726	47	Lactobacillaceae	99.35	0.65	USA	Homo sapiens
GCF_027682185.1	ASM2768218v1	1878756	Scaffold	PRJNA903559	SAMN31807994	1952	1840	49	Lactobacillaceae	99.35	0.65	China	Homo sapiens
GCF_028607005.1	ASM2860700v1	1837310	Complete Genome	PRJNA930673	SAMN33053617	1826	1691	56	Lactobacillaceae	99.25		USA	Homo sapiens
GCF_030371355.1	ASM3037135v1	1806004	Contig	PRJNA377666	SAMN34359432	1780	1678	49	Lactobacillaceae	99.13		absent	Gallus gallus
GCF_030371875.1	ASM3037187v1	1722044	Contig	PRJNA377666	SAMN34359402	1690	1588	48	Lactobacillaceae	99.35		absent	Gallus gallus
GCF_030371915.1	ASM3037191v1	1883654	Contig	PRJNA377666	SAMN34359413	1868	1768	45	Lactobacillaceae	99.35		absent	Gallus gallus
GCF_030371965.1	ASM3037196v1	1843164	Contig	PRJNA377666	SAMN34359401	1840	1743	45	Lactobacillaceae	99.02		absent	Gallus gallus
GCF_030372015.1	ASM3037201v1	1772026	Contig	PRJNA377666	SAMN34359407	1757	1659	45	Lactobacillaceae	99.35		absent	Gallus gallus
GCF_030373865.1	ASM3037386v1	1796370	Contig	PRJNA377666	SAMN34359383	1772	1678	40	Lactobacillaceae	99.35		absent	Gallus gallus
GCF_042642825.1	ASM4264282v1	1558444	Contig	PRJNA1093152	SAMN43111978	1574	1481	66	Lactobacillaceae	95.59	1.98	Brazil	absent
GCF_042644665.1	ASM4264466v1	1801075	Contig	PRJNA1093152	SAMN43111960	1893	1786	71	Lactobacillaceae	95.68	1.69	Brazil	absent
GCF_043424115.1	ASM4342411v1	1782944	Contig	PRJNA987158	SAMN43765769	1789	1689	57	Lactobacillaceae	94.12		absent	absent
GCF_046982765.1	ASM4698276v1	1565257	Scaffold	PRJNA1060349	SAMN43248673	1612	1510	69	Lactobacillaceae	95.16	1.63	USA	Homo sapiens
GCF_904382385.1	Chicken_18_mag_89	1588077	Contig	PRJEB33338	SAMEA7202304	1565	1489	25	Lactobacillaceae	96.73		absent	absent
GCF_905371805.1	SRR9217392-mag-bin.4	1755812	Contig	PRJEB43277	SAMEA8395107	1745	1659	42	Lactobacillaceae	99.35		Austria	Homo sapiens
GCF_925282335.1	IM929	1899052	Contig	PRJEB49530	SAMEA11998736	1974	1790	107	Lactobacillaceae	99.35	0.65	China	Tscherskia triton
GCF_944325995.1	BRZ_HP__bin55	1680030	Contig	PRJEB53581	SAMEA110134629	1663	1599	30	Lactobacillaceae	96.08		absent	absent
GCF_947381785.1	J29	1936702	Contig	PRJEB56193	SAMEA112151021	1923	1803	44	Lactobacillaceae	99.35	0.18	absent	absent
GCF_947381825.1	I18	1730222	Contig	PRJEB56193	SAMEA112151011	1696	1575	50	Lactobacillaceae	99.35	0.11	absent	absent
GCF_958412415.1	ERR10960916_bin.4_MetaWRAP_v1.3_MAG	1558142	Contig	PRJEB62839	SAMEA114061492	1531	1475	41	Lactobacillaceae	96.23	0.65	absent	absent
GCF_963510615.1	SRR17798763_bin.3_MetaWRAP_v1.3_MAG	1637968	Contig	PRJEB65910	SAMEA114402780	1649	1585	36	Lactobacillaceae	96.75		absent	absent
GCF_963930215.1	metabat2_XCR1_HET_6747_bwa.82_MAG	1562111	Contig	PRJEB64517	SAMEA115146452	1562	1489	38	Lactobacillaceae	92.38	1.63	absent	absent
GCF_964379125.1	ERR11768907_concoct_2	1486532	Contig	PRJEB82468	SAMEA117401598	1484	1395	72	Lactobacillaceae	90.76	0.55	absent	absent
GCF_964379155.1	ERR11768928_concoct_15	1621280	Contig	PRJEB82468	SAMEA117401611	1593	1524	38	Lactobacillaceae	97.95	0.07	absent	absent
GCF_964382695.1	SRR23946439_binner12_Refined_24	1466124	Contig	PRJEB82471	SAMEA117402125	1461	1404	37	Lactobacillaceae	92.6		absent	absent

## Sheet: Árvore
Assembly Accession	Assembly Name	Assembly BioProject Accession	Assembly BioSample Accession	País	Fonte de isolamento
GCF_013487925.1	ASM1348792v1	PRJNA597131	SAMN13624823	EUA	Equus caballus
GCF_001908415.1	ASM190841v1	PRJNA355325	SAMN06074288	Coreia do Sul	ambiente
GCF_000056065.1	ASM5606v1	PRJNA16871	SAMEA3138258	França	-
GCF_001888925.1	ASM188892v1	PRJNA355248	SAMN06066887	Coreia do Sul	ambiente
GCF_001436045.1	ASM143604v1	PRJNA222257	SAMN02369487	Alemanha	alimento fermentado
GCF_014145505.1	ASM1414550v1	PRJNA649652	SAMN15676322	Lituânia	Microtus oeconomus
GCF_014836425.1	ASM1483642v1	PRJNA543206	SAMN15803264	Reino Unido	Gallus gallus
GCF_014838735.1	ASM1483873v1	PRJNA548360	SAMN15159667	Portugal	Homo sapiens
GCF_014838745.1	ASM1483874v1	PRJNA548360	SAMN15159665	Portugal	Homo sapiens
GCF_025677785.1	ASM2567778v1	PRJNA872822	SAMN30470964	China	Homo sapiens
GCF_009362935.1	ASM936293v1	PRJNA566211	SAMN12784813	Coreia do Sul	Homo sapiens
GCF_025311515.1	ASM2531151v1	PRJNA880306	SAMN30837134	EUA	Gallus gallus
GCF_014145455.1	ASM1414545v1	PRJNA649652	SAMN15676320	EUA	Rhabdomys pumilio
GCF_014635905.1	ASM1463590v1	PRJDB10511	SAMD00244886	China	-
GCF_014145585.1	ASM1414558v1	PRJNA649652	SAMN15676316	EUA	Microtus agrestis
GCF_014145615.1	ASM1414561v1	PRJNA649652	SAMN15676314	Lituânia	Apodemus flavicollis
GCF_018884225.1	ASM1888422v1	PRJNA682320	SAMN16987598	China	Bos grunniens
GCF_003703885.1	ASM370388v1	PRJNA434601	SAMN08615538	EUA	roedor
GCF_000615845.1	ASM61584v1	PRJDB650	SAMD00008721	Japão	Homo sapiens
GCF_000423245.1	ASM42324v1	PRJNA185632	SAMN02441169	Espanha	Ziphiidae
GCF_001434535.1	ASM143453v1	PRJNA222257	SAMN02369389	China	babuíno
GCF_001434405.1	ASM143440v1	PRJNA222257	SAMN02369391	China	roedor
GCF_022643045.1	ASM2264304v1	PRJNA609246	SAMN14239242	EUA	Bos taurus
GCF_902386685.1	UHGG_MGYG-HGUT-02390	PRJEB33885	SAMEA5851894	-	Homo sapiens
GCF_025311475.1	ASM2531147v1	PRJNA880302	SAMN30837123	EUA	Gallus gallus
GCF_019967715.1	ASM1996771v1	PRJNA760985	SAMN21240282	China	Gallus gallus
GCF_019343125.1	ASM1934312v1	PRJNA741717	SAMN19908122	China	solo
GCF_041196675.1	ASM4119667v1	PRJNA1141267	SAMN42884494	China	Homo sapiens
GCF_015751045.1	ASM1575104v1	PRJDB7793	SAMD00255145	Itália	alimento fermentado
GCF_046524075.1	ASM4652407v1	PRJNA1188493	SAMN44839476	EUA	Homo sapiens
GCF_000009045.1	ASM904v1	PRJNA76	SAMEA3138188	-	-
GCF_000015785.2	ASM1578v2	PRJNA13403	SAMN02603158	Alemanha	solo
GCF_001886265.1	ASM188626v1	PRJNA270385	SAMN03267187	Tailândia	alimento fermentado
GCF_019343125.1	ASM1934312v1	PRJNA741717	SAMN19908122	China	solo
GCF_007990225.1	ASM799022v1	PRJDB6093	SAMD00166261	Canada	Sus scrofa
GCF_001886195.1	ASM188619v1	PRJNA270385	SAMN03267184	EUA	roedor
GCF_002813755.1	ASM281375v1	PRJNA353761	SAMN06020033	Alemanha	solo
GCF_005158285.1	ASM515828v1	PRJNA453425	SAMN08978749	Coreia do Sul	Homo sapiens
GCF_028128535.1	ASM2812853v1	PRJNA172933	SAMN13795844	EUA	fruta
GCF_029023785.1	ASM2902378v1	PRJNA936091	SAMN33336517	-	-
GCF_009734005.1	ASM973400v2	PRJNA520784	SAMN10867607	China	Homo sapiens
GCF_019977575.1	ASM1997757v1	PRJDB11708	SAMD00324536	Japão	Homo sapiens
