# Supplementary material for: Genome-Resolved In Silico Analysis of Poultry and Swine Lactobacillales Provides a Data- Driven Framework for Elucidating Metabolic Synergies in Multi-Strain Probiotics
Source: Research Square preprint supplement (doi:10.21203/rs.3.rs-7234892/v1), 2025-08-12
Supplement: Supplementary file 2 [file 66a5b50981fa4233ae2bb183.xlsx]

## Sheet: TS9
gene	Protein accession	Sequence length	Analysis	Signature accession	Signature description	Start location	Stop location	Score	InterPro annotations – accession	InterPro annotations – description
agaL	AB1379_03705	744	PRINTS	PR00743	Glycosyl hydrolase family 36 signature	248	263	5.9E-58	IPR002252	Glycoside hydrolase family 36
agaL	AB1379_03705	744	PRINTS	PR00743	Glycosyl hydrolase family 36 signature	299	319	5.9E-58	IPR002252	Glycoside hydrolase family 36
agaL	AB1379_03705	744	PRINTS	PR00743	Glycosyl hydrolase family 36 signature	337	351	5.9E-58	IPR002252	Glycoside hydrolase family 36
agaL	AB1379_03705	744	PRINTS	PR00743	Glycosyl hydrolase family 36 signature	365	380	5.9E-58	IPR002252	Glycoside hydrolase family 36
agaL	AB1379_03705	744	PRINTS	PR00743	Glycosyl hydrolase family 36 signature	415	437	5.9E-58	IPR002252	Glycoside hydrolase family 36
agaL	AB1379_03705	744	PRINTS	PR00743	Glycosyl hydrolase family 36 signature	473	488	5.9E-58	IPR002252	Glycoside hydrolase family 36
agaL	AB1379_03705	744	PRINTS	PR00743	Glycosyl hydrolase family 36 signature	525	541	5.9E-58	IPR002252	Glycoside hydrolase family 36
agaL	AB1379_03705	744	PRINTS	PR00743	Glycosyl hydrolase family 36 signature	550	566	5.9E-58	IPR002252	Glycoside hydrolase family 36
agaL	AB1379_03705	744	Pfam	PF16875	Glycosyl hydrolase family 36 N-terminal domain	33	291	1.1E-77	IPR031704	Glycosyl hydrolase family 36, N-terminal
agaL	AB1379_03705	744	Gene3D	G3DSA:2.70.98.60	-	3	316	4.3E-108	IPR038417	Alpha-galactosidase, N-terminal domain superfamily
agaL	AB1379_03705	744	PIRSF	PIRSF005536	Agal	5	732	0.0	IPR002252	Glycoside hydrolase family 36
agaL	AB1379_03705	744	CDD	cd14791	GH36	335	632	0.0	IPR002252	Glycoside hydrolase family 36
agaL	AB1379_03705	744	FunFam	G3DSA:3.20.20.70:FF:000118	Alpha-galactosidase	317	637	0.0	-	-
agaL	AB1379_03705	744	Gene3D	G3DSA:3.20.20.70	Aldolase class I	317	637	1.3E-126	IPR013785	Aldolase-type TIM barrel
agaL	AB1379_03705	744	ProSitePatterns	PS00512	Alpha-galactosidase signature.	366	381	-	IPR000111	Glycoside hydrolase family 27/36, conserved site
agaL	AB1379_03705	744	PANTHER	PTHR43053	GLYCOSIDASE FAMILY 31	232	640	1.8E-35	IPR050985	Alpha-glycosidase and related enzymes
agaL	AB1379_03705	744	SUPERFAMILY	SSF51445	(Trans)glycosidases	333	670	8.73E-107	IPR017853	Glycoside hydrolase superfamily
agaL	AB1379_03705	744	Gene3D	G3DSA:2.60.40.1180	-	638	740	1.5E-23	IPR013780	Glycosyl hydrolase, all-beta
agaL	AB1379_03705	744	Pfam	PF16874	Glycosyl hydrolase family 36 C-terminal domain	654	729	1.2E-13	IPR031705	Glycosyl hydrolase family 36, C-terminal
agaL	AB1379_03705	744	Pfam	PF02065	Melibiase	296	640	0.0	-	-
agaL	P27756	720	Gene3D	G3DSA:2.60.40.1180	-	626	719	2.7E-18	IPR013780	Glycosyl hydrolase, all-beta
agaL	P27756	720	Pfam	PF16874	Glycosyl hydrolase family 36 C-terminal domain	651	717	3.2E-12	IPR031705	Glycosyl hydrolase family 36, C-terminal
agaL	P27756	720	Gene3D	G3DSA:3.20.20.70	Aldolase class I	304	625	1.1E-127	IPR013785	Aldolase-type TIM barrel
agaL	P27756	720	Pfam	PF16875	Glycosyl hydrolase family 36 N-terminal domain	26	279	3.6E-63	IPR031704	Glycosyl hydrolase family 36, N-terminal
agaL	P27756	720	CDD	cd14791	GH36	322	620	0.0	IPR002252	Glycoside hydrolase family 36
agaL	P27756	720	PIRSF	PIRSF005536	Agal	1	720	0.0	IPR002252	Glycoside hydrolase family 36
agaL	P27756	720	SUPERFAMILY	SSF51445	(Trans)glycosidases	319	633	1.19E-102	IPR017853	Glycoside hydrolase superfamily
agaL	P27756	720	Gene3D	G3DSA:2.70.98.60	-	4	303	1.8E-78	IPR038417	Alpha-galactosidase, N-terminal domain superfamily
agaL	P27756	720	ProSitePatterns	PS00512	Alpha-galactosidase signature.	353	368	-	IPR000111	Glycoside hydrolase family 27/36, conserved site
agaL	P27756	720	PRINTS	PR00743	Glycosyl hydrolase family 36 signature	235	250	2.7E-65	IPR002252	Glycoside hydrolase family 36
agaL	P27756	720	PRINTS	PR00743	Glycosyl hydrolase family 36 signature	286	306	2.7E-65	IPR002252	Glycoside hydrolase family 36
agaL	P27756	720	PRINTS	PR00743	Glycosyl hydrolase family 36 signature	324	338	2.7E-65	IPR002252	Glycoside hydrolase family 36
agaL	P27756	720	PRINTS	PR00743	Glycosyl hydrolase family 36 signature	352	367	2.7E-65	IPR002252	Glycoside hydrolase family 36
agaL	P27756	720	PRINTS	PR00743	Glycosyl hydrolase family 36 signature	402	424	2.7E-65	IPR002252	Glycoside hydrolase family 36
agaL	P27756	720	PRINTS	PR00743	Glycosyl hydrolase family 36 signature	460	475	2.7E-65	IPR002252	Glycoside hydrolase family 36
agaL	P27756	720	PRINTS	PR00743	Glycosyl hydrolase family 36 signature	513	529	2.7E-65	IPR002252	Glycoside hydrolase family 36
agaL	P27756	720	PRINTS	PR00743	Glycosyl hydrolase family 36 signature	538	554	2.7E-65	IPR002252	Glycoside hydrolase family 36
agaL	P27756	720	Pfam	PF02065	Melibiase	283	628	0.0	-	-
agaL	P27756	720	FunFam	G3DSA:3.20.20.70:FF:000118	Alpha-galactosidase	304	625	0.0	-	-
agaL	P27756	720	PANTHER	PTHR43053	GLYCOSIDASE FAMILY 31	219	619	1.1E-40	IPR050985	Alpha-glycosidase and related enzymes
lplD	AB1361_05000	443	PRINTS	PR00732	Glycosyl hydrolase family 4 signature	5	20	3.4E-57	IPR001088	Glycoside hydrolase, family 4
lplD	AB1361_05000	443	PRINTS	PR00732	Glycosyl hydrolase family 4 signature	74	90	3.4E-57	IPR001088	Glycoside hydrolase, family 4
lplD	AB1361_05000	443	PRINTS	PR00732	Glycosyl hydrolase family 4 signature	95	108	3.4E-57	IPR001088	Glycoside hydrolase, family 4
lplD	AB1361_05000	443	PRINTS	PR00732	Glycosyl hydrolase family 4 signature	109	129	3.4E-57	IPR001088	Glycoside hydrolase, family 4
lplD	AB1361_05000	443	PRINTS	PR00732	Glycosyl hydrolase family 4 signature	138	155	3.4E-57	IPR001088	Glycoside hydrolase, family 4
lplD	AB1361_05000	443	PRINTS	PR00732	Glycosyl hydrolase family 4 signature	164	175	3.4E-57	IPR001088	Glycoside hydrolase, family 4
lplD	AB1361_05000	443	PRINTS	PR00732	Glycosyl hydrolase family 4 signature	191	203	3.4E-57	IPR001088	Glycoside hydrolase, family 4
lplD	AB1361_05000	443	Gene3D	G3DSA:3.40.50.720	-	1	166	9.3E-58	-	-
lplD	AB1361_05000	443	PANTHER	PTHR32092	6-PHOSPHO-BETA-GLUCOSIDASE-RELATED	1	443	0.0	IPR001088	Glycoside hydrolase, family 4
lplD	AB1361_05000	443	CDD	cd05298	GH4_GlvA_pagL_like	4	443	0.0	-	-
lplD	AB1361_05000	443	Gene3D	G3DSA:3.90.110.10	-	167	443	7.9E-89	IPR015955	Lactate dehydrogenase/glycoside hydrolase, family 4, C-terminal
lplD	AB1361_05000	443	Pfam	PF11975	Family 4 glycosyl hydrolase C-terminal domain	195	417	8.8E-54	IPR022616	Glycosyl hydrolase, family 4, C-terminal
lplD	AB1361_05000	443	SUPERFAMILY	SSF51735	NAD(P)-binding Rossmann-fold domains	3	163	3.29E-53	IPR036291	NAD(P)-binding domain superfamily
lplD	AB1361_05000	443	ProSitePatterns	PS01324	Glycosyl hydrolases family 4 signature.	138	169	-	IPR019802	Glycoside hydrolase, family 4, conserved site
lplD	AB1361_05000	443	SUPERFAMILY	SSF56327	LDH C-terminal domain-like	168	443	1.35E-90	IPR015955	Lactate dehydrogenase/glycoside hydrolase, family 4, C-terminal
lplD	AB1361_05000	443	Pfam	PF02056	Family 4 glycosyl hydrolase	5	184	8.1E-63	IPR001088	Glycoside hydrolase, family 4
lplD	P39130	446	PRINTS	PR00732	Glycosyl hydrolase family 4 signature	11	26	1.2E-38	IPR001088	Glycoside hydrolase, family 4
lplD	P39130	446	PRINTS	PR00732	Glycosyl hydrolase family 4 signature	76	92	1.2E-38	IPR001088	Glycoside hydrolase, family 4
lplD	P39130	446	PRINTS	PR00732	Glycosyl hydrolase family 4 signature	97	110	1.2E-38	IPR001088	Glycoside hydrolase, family 4
lplD	P39130	446	PRINTS	PR00732	Glycosyl hydrolase family 4 signature	113	133	1.2E-38	IPR001088	Glycoside hydrolase, family 4
lplD	P39130	446	PRINTS	PR00732	Glycosyl hydrolase family 4 signature	142	159	1.2E-38	IPR001088	Glycoside hydrolase, family 4
lplD	P39130	446	PRINTS	PR00732	Glycosyl hydrolase family 4 signature	168	179	1.2E-38	IPR001088	Glycoside hydrolase, family 4
lplD	P39130	446	PRINTS	PR00732	Glycosyl hydrolase family 4 signature	201	213	1.2E-38	IPR001088	Glycoside hydrolase, family 4
lplD	P39130	446	Pfam	PF11975	Family 4 glycosyl hydrolase C-terminal domain	205	425	2.6E-41	IPR022616	Glycosyl hydrolase, family 4, C-terminal
lplD	P39130	446	Pfam	PF02056	Family 4 glycosyl hydrolase	11	188	1.9E-66	IPR001088	Glycoside hydrolase, family 4
lplD	P39130	446	CDD	cd05297	GH4_alpha_glucosidase_galactosidase	10	443	0.0	-	-
lplD	P39130	446	Gene3D	G3DSA:3.90.1820.10	-	5	446	0.0	IPR053715	Glycosyl Hydrolase 4 Enzyme Superfamily
lplD	P39130	446	PANTHER	PTHR32092	6-PHOSPHO-BETA-GLUCOSIDASE-RELATED	8	441	4.4E-129	IPR001088	Glycoside hydrolase, family 4
lplD	P39130	446	ProSitePatterns	PS01324	Glycosyl hydrolases family 4 signature.	142	173	-	IPR019802	Glycoside hydrolase, family 4, conserved site
lplD	P39130	446	SUPERFAMILY	SSF51735	NAD(P)-binding Rossmann-fold domains	9	171	6.31E-38	IPR036291	NAD(P)-binding domain superfamily
lplD	P39130	446	SUPERFAMILY	SSF56327	LDH C-terminal domain-like	172	442	1.04E-45	IPR015955	Lactate dehydrogenase/glycoside hydrolase, family 4, C-terminal
msmE	AB1379_02260	399	Gene3D	G3DSA:3.40.190.10	-	9	396	4.3E-92	-	-
msmE	AB1379_02260	399	PANTHER	PTHR43649	ARABINOSE-BINDING PROTEIN-RELATED	1	322	3.2E-36	IPR050490	Bacterial solute-binding protein 1
msmE	AB1379_02260	399	CDD	cd13585	PBP2_TMBP_like	16	394	7.53035e-55	-	-
msmE	AB1379_02260	399	Pfam	PF01547	Bacterial extracellular solute-binding protein	26	310	7.3E-31	IPR006059	Bacterial-type extracellular solute-binding protein
msmE	AB1379_02260	399	SUPERFAMILY	SSF53850	Periplasmic binding protein-like II	1	396	7.41E-63	-	-
msmE	Q00749	398	SUPERFAMILY	SSF53850	Periplasmic binding protein-like II	1	394	5.22E-68	-	-
msmE	Q00749	398	Gene3D	G3DSA:3.40.190.10	-	22	343	1.4E-80	-	-
msmE	Q00749	398	Gene3D	G3DSA:3.40.190.10	-	124	364	1.4E-80	-	-
msmE	Q00749	398	PANTHER	PTHR43649	ARABINOSE-BINDING PROTEIN-RELATED	7	351	5.0E-35	IPR050490	Bacterial solute-binding protein 1
msmE	Q00749	398	Pfam	PF01547	Bacterial extracellular solute-binding protein	23	316	2.2E-42	IPR006059	Bacterial-type extracellular solute-binding protein
msmE	Q00749	398	ProSitePatterns	PS01037	Bacterial extracellular solute-binding proteins, family 1 signature.	118	135	-	IPR006061	Solute-binding family 1, conserved site
msmF	AB1379_02265	298	CDD	cd06261	TM_PBP2	76	282	7.00011e-09	IPR000515	ABC transporter type 1, transmembrane domain MetI-like
msmF	AB1379_02265	298	Gene3D	G3DSA:1.10.3720.10	-	56	296	2.2E-81	IPR035906	MetI-like superfamily
msmF	AB1379_02265	298	PANTHER	PTHR30193	ABC TRANSPORTER PERMEASE PROTEIN	10	296	6.8E-105	IPR051393	ABC transporter permease component
msmF	AB1379_02265	298	Pfam	PF00528	Binding-protein-dependent transport system inner membrane component	98	288	5.5E-14	IPR000515	ABC transporter type 1, transmembrane domain MetI-like
msmF	AB1379_02265	298	ProSiteProfiles	PS50928	ABC transporter integral membrane type-1 domain profile.	76	288	24474844	IPR000515	ABC transporter type 1, transmembrane domain MetI-like
msmF	AB1379_02265	298	SUPERFAMILY	SSF161098	MetI-like	60	287	6.93E-71	IPR035906	MetI-like superfamily
msmF	q00750	290	PANTHER	PTHR30193	ABC TRANSPORTER PERMEASE PROTEIN	4	287	4.1E-70	IPR051393	ABC transporter permease component
msmF	q00750	290	CDD	cd06261	TM_PBP2	70	263	0.00023268	IPR000515	ABC transporter type 1, transmembrane domain MetI-like
msmF	q00750	290	ProSiteProfiles	PS50928	ABC transporter integral membrane type-1 domain profile.	70	281	24387751	IPR000515	ABC transporter type 1, transmembrane domain MetI-like
msmF	q00750	290	SUPERFAMILY	SSF161098	MetI-like	55	279	6.28E-50	IPR035906	MetI-like superfamily
msmF	q00750	290	Pfam	PF00528	Binding-protein-dependent transport system inner membrane component	85	279	1.2E-11	IPR000515	ABC transporter type 1, transmembrane domain MetI-like
msmF	q00750	290	Gene3D	G3DSA:1.10.3720.10	-	50	289	1.1E-58	IPR035906	MetI-like superfamily
msmG	AB1379_02270	298	CDD	cd06261	TM_PBP2	76	282	7.00011e-09	IPR000515	ABC transporter type 1, transmembrane domain MetI-like
msmG	AB1379_02270	298	Gene3D	G3DSA:1.10.3720.10	-	56	296	2.2E-81	IPR035906	MetI-like superfamily
msmG	AB1379_02270	298	PANTHER	PTHR30193	ABC TRANSPORTER PERMEASE PROTEIN	10	296	6.8E-105	IPR051393	ABC transporter permease component
msmG	AB1379_02270	298	Pfam	PF00528	Binding-protein-dependent transport system inner membrane component	98	288	5.5E-14	IPR000515	ABC transporter type 1, transmembrane domain MetI-like
msmG	AB1379_02270	298	ProSiteProfiles	PS50928	ABC transporter integral membrane type-1 domain profile.	76	288	24474844	IPR000515	ABC transporter type 1, transmembrane domain MetI-like
msmG	AB1379_02270	298	SUPERFAMILY	SSF161098	MetI-like	60	287	6.93E-71	IPR035906	MetI-like superfamily
msmG	q00751	277	Gene3D	G3DSA:1.10.3720.10	-	1	265	1.4E-54	IPR035906	MetI-like superfamily
msmG	q00751	277	PANTHER	PTHR32243	MALTOSE TRANSPORT SYSTEM PERMEASE-RELATED	2	277	3.7E-61	IPR050901	Binding-protein-dependent ABC transporter permease
msmG	q00751	277	ProSiteProfiles	PS50928	ABC transporter integral membrane type-1 domain profile.	69	263	18204132	IPR000515	ABC transporter type 1, transmembrane domain MetI-like
msmG	q00751	277	Pfam	PF00528	Binding-protein-dependent transport system inner membrane component	92	271	5.9E-24	IPR000515	ABC transporter type 1, transmembrane domain MetI-like
msmG	q00751	277	CDD	cd06261	TM_PBP2	69	240	7.31425e-09	IPR000515	ABC transporter type 1, transmembrane domain MetI-like
msmG	q00751	277	SUPERFAMILY	SSF161098	MetI-like	4	277	7.38E-59	IPR035906	MetI-like superfamily
msmK	AB1379_02285	369	Pfam	PF17912	MalK OB fold domain	237	290	1.3E-12	IPR040582	MalK-like, OB fold domain
msmK	AB1379_02285	369	Gene3D	G3DSA:2.40.50.100	-	241	305	4.9E-19	-	-
msmK	AB1379_02285	369	NCBIfam	NF008653	sn-glycerol-3-phosphate ABC transporter ATP-binding protein UgpC	1	366	0.0	-	-
msmK	AB1379_02285	369	CDD	cd03301	ABC_MalK_N	6	218	0.0	IPR015855	ABC transporter, maltose/maltodextrin import, MalK-like
msmK	AB1379_02285	369	ProSitePatterns	PS00211	ABC transporters family signature.	136	150	-	IPR017871	ABC transporter-like, conserved site
msmK	AB1379_02285	369	Gene3D	G3DSA:2.40.50.140	-	306	348	6.0E-16	IPR012340	Nucleic acid-binding, OB-fold
msmK	AB1379_02285	369	SMART	SM00382	AAA_5	30	213	7.6E-13	IPR003593	AAA+ ATPase domain
msmK	AB1379_02285	369	SUPERFAMILY	SSF52540	P-loop containing nucleoside triphosphate hydrolases	5	245	8.61E-85	IPR027417	P-loop containing nucleoside triphosphate hydrolase
msmK	AB1379_02285	369	FunFam	G3DSA:3.40.50.300:FF:000042	Maltose/maltodextrin ABC transporter, ATP-binding protein	1	240	2.0E-123	-	-
msmK	AB1379_02285	369	ProSiteProfiles	PS50893	ATP-binding cassette, ABC transporter-type domain profile.	4	236	31179201	IPR003439	ABC transporter-like, ATP-binding domain
msmK	AB1379_02285	369	PANTHER	PTHR43875	MALTODEXTRIN IMPORT ATP-BINDING PROTEIN MSMX	1	367	0.0	IPR047641	ABC transporter, ATP-binding protein MalK/UgpC-like
msmK	AB1379_02285	369	SUPERFAMILY	SSF50331	MOP-like	238	366	1.17E-25	IPR008995	Molybdate/tungstate binding, C-terminal
msmK	AB1379_02285	369	Gene3D	G3DSA:3.40.50.300	-	1	240	5.4E-72	IPR027417	P-loop containing nucleoside triphosphate hydrolase
msmK	AB1379_02285	369	FunFam	G3DSA:2.40.50.100:FF:000028	Sugar ABC transporter, ATP-binding protein	241	305	1.2E-23	-	-
msmK	AB1379_02285	369	Pfam	PF00005	ABC transporter	22	163	2.5E-28	IPR003439	ABC transporter-like, ATP-binding domain
msmK	q00752	377	Gene3D	G3DSA:2.40.50.100	-	251	315	1.0E-13	-	-
msmK	q00752	377	ProSitePatterns	PS00211	ABC transporters family signature.	136	150	-	IPR017871	ABC transporter-like, conserved site
msmK	q00752	377	SUPERFAMILY	SSF50331	MOP-like	248	376	2.92E-27	IPR008995	Molybdate/tungstate binding, C-terminal
msmK	q00752	377	Gene3D	G3DSA:3.40.50.300	-	1	250	1.9E-70	IPR027417	P-loop containing nucleoside triphosphate hydrolase
msmK	q00752	377	FunFam	G3DSA:3.40.50.300:FF:000042	Maltose/maltodextrin ABC transporter, ATP-binding protein	1	250	3.2E-120	-	-
msmK	q00752	377	CDD	cd03301	ABC_MalK_N	4	228	0.0	IPR015855	ABC transporter, maltose/maltodextrin import, MalK-like
msmK	q00752	377	Gene3D	G3DSA:2.40.50.140	-	316	358	1.3E-17	IPR012340	Nucleic acid-binding, OB-fold
msmK	q00752	377	Pfam	PF00005	ABC transporter	22	163	1.8E-28	IPR003439	ABC transporter-like, ATP-binding domain
msmK	q00752	377	ProSiteProfiles	PS50893	ATP-binding cassette, ABC transporter-type domain profile.	4	246	28624861	IPR003439	ABC transporter-like, ATP-binding domain
msmK	q00752	377	Pfam	PF03459	TOBE domain	315	364	0.32	IPR005116	Transport-associated OB, type 1
msmK	q00752	377	SUPERFAMILY	SSF52540	P-loop containing nucleoside triphosphate hydrolases	4	256	1.87E-80	IPR027417	P-loop containing nucleoside triphosphate hydrolase
msmK	q00752	377	PANTHER	PTHR43875	MALTODEXTRIN IMPORT ATP-BINDING PROTEIN MSMX	1	376	0.0	IPR047641	ABC transporter, ATP-binding protein MalK/UgpC-like
msmK	q00752	377	Pfam	PF17912	MalK OB fold domain	247	300	2.2E-11	IPR040582	MalK-like, OB fold domain
msmK	q00752	377	SMART	SM00382	AAA_5	30	213	4.4E-12	IPR003593	AAA+ ATPase domain
pemA	AB1361_11455	307	PANTHER	PTHR31321	ACYL-COA THIOESTER HYDROLASE YBHC-RELATED	18	287	2.4E-57	-	-
pemA	AB1361_11455	307	Pfam	PF01095	Pectinesterase	15	145	1.3E-16	IPR000070	Pectinesterase, catalytic
pemA	AB1361_11455	307	Pfam	PF01095	Pectinesterase	171	287	1.4E-23	IPR000070	Pectinesterase, catalytic
pemA	AB1361_11455	307	SUPERFAMILY	SSF51126	Pectin lyase-like	15	286	1.65E-58	IPR011050	Pectin lyase fold/virulence factor
pemA	AB1361_11455	307	ProSitePatterns	PS00503	Pectinesterase signature 2.	179	188	-	IPR033131	Pectinesterase, Asp active site
pemA	AB1361_11455	307	Gene3D	G3DSA:2.160.20.10	-	3	292	8.0E-85	IPR012334	Pectin lyase fold
pemA	P0C1A9	366	Pfam	PF01095	Pectinesterase	30	355	1.9E-37	IPR000070	Pectinesterase, catalytic
pemA	P0C1A9	366	ProSitePatterns	PS00503	Pectinesterase signature 2.	194	203	-	IPR033131	Pectinesterase, Asp active site
pemA	P0C1A9	366	NCBIfam	NF041896	pectinesterase PemA	1	366	0.0	IPR053505	Pectinesterase
pemA	P0C1A9	366	PANTHER	PTHR31321	ACYL-COA THIOESTER HYDROLASE YBHC-RELATED	13	357	7.7E-54	-	-
pemA	P0C1A9	366	SUPERFAMILY	SSF51126	Pectin lyase-like	25	364	1.57E-71	IPR011050	Pectin lyase fold/virulence factor
pemA	P0C1A9	366	Gene3D	G3DSA:2.160.20.10	-	25	366	3.0E-125	IPR012334	Pectin lyase fold
pgaA	AB1361_11465	445	Gene3D	G3DSA:2.160.20.10	-	1	372	0.0	IPR012334	Pectin lyase fold
pgaA	AB1361_11465	445	Pfam	PF00295	Glycosyl hydrolases family 28	34	363	1.4E-47	IPR000743	Glycoside hydrolase, family 28
pgaA	AB1361_11465	445	SUPERFAMILY	SSF51126	Pectin lyase-like	2	367	3.0E-101	IPR011050	Pectin lyase fold/virulence factor
pgaA	AB1361_11465	445	PANTHER	PTHR31339	PECTIN LYASE-RELATED	3	381	9.3E-93	IPR051801	Glycosyl_Hydrolase_28_Enzymes
pgaA	AB1361_11465	445	ProSitePatterns	PS00502	Polygalacturonase active site.	226	240	-	IPR000743	Glycoside hydrolase, family 28
pgaA	AB1361_11465	445	SMART	SM00710	pbh1	219	240	2025-06-01	IPR006626	Parallel beta-helix repeat
pgaA	AB1361_11465	445	SMART	SM00710	pbh1	187	208	2025-01-04	IPR006626	Parallel beta-helix repeat
pgaA	AB1361_11465	445	SMART	SM00710	pbh1	160	186	85.0	IPR006626	Parallel beta-helix repeat
pgaA	AB1361_11465	445	SMART	SM00710	pbh1	246	267	9.0	IPR006626	Parallel beta-helix repeat
pgaA	Q9P4W4	370	Gene3D	G3DSA:2.160.20.10	-	33	368	1.4E-109	IPR012334	Pectin lyase fold
pgaA	Q9P4W4	370	FunFam	G3DSA:2.160.20.10:FF:000002	Endopolygalacturonase D	33	368	0.0	-	-
pgaA	Q9P4W4	370	Pfam	PF00295	Glycosyl hydrolases family 28	50	368	2.7E-121	IPR000743	Glycoside hydrolase, family 28
pgaA	Q9P4W4	370	SMART	SM00710	pbh1	215	235	6700.0	IPR006626	Parallel beta-helix repeat
pgaA	Q9P4W4	370	SMART	SM00710	pbh1	307	352	150.0	IPR006626	Parallel beta-helix repeat
pgaA	Q9P4W4	370	SMART	SM00710	pbh1	193	214	170.0	IPR006626	Parallel beta-helix repeat
pgaA	Q9P4W4	370	SMART	SM00710	pbh1	162	192	2025-05-03	IPR006626	Parallel beta-helix repeat
pgaA	Q9P4W4	370	SMART	SM00710	pbh1	273	295	47.0	IPR006626	Parallel beta-helix repeat
pgaA	Q9P4W4	370	SMART	SM00710	pbh1	244	265	2025-09-04	IPR006626	Parallel beta-helix repeat
pgaA	Q9P4W4	370	PANTHER	PTHR31884	POLYGALACTURONASE	8	368	0.0	IPR050434	Glycosyl hydrolase family 28
pgaA	Q9P4W4	370	SUPERFAMILY	SSF51126	Pectin lyase-like	47	368	2.18E-96	IPR011050	Pectin lyase fold/virulence factor
pgaA	Q9P4W4	370	ProSitePatterns	PS00502	Polygalacturonase active site.	222	235	-	IPR000743	Glycoside hydrolase, family 28
