# Supplementary material for: Genome-Resolved In Silico Analysis of Poultry and Swine Lactobacillales Provides a Data- Driven Framework for Elucidating Metabolic Synergies in Multi-Strain Probiotics
Source: Research Square preprint supplement (doi:10.21203/rs.3.rs-7234892/v1), 2025-08-12
Supplement: Supplementary file 3 [file 704ededd69bf8ed3db8a5c9d.xlsx]

## Sheet: E_lactis
Gene	aac6	msrC	acm	sgrA	efmA
Annotation	aminoglycoside N-acetyltransferase AAC(6')-Ii	ABC-F type ribosomal protection protein Msr(C)	Cna B-type domain-containing protein;collagen-binding MSCRAMM adhesin Acm;LPXTG cell wall anchor domain-containing protein	LPXTG cell wall anchor domain-containing protein;peptidase;cell wall anchor protein;LPXTG-anchored fibrinogen/nidogen-binding adhesin SgrA;hypothetical protein	multidrug efflux MFS transporter EfmA
E_lactis_m3d	present	pseudo	present	present	present
GCF_027687175.1_ASM2768717v1_genomic	present	present	present	present	present
GCF_029599715.1_ASM2959971v1_genomic	present	present	present	present	present
GCF_033954875.1_ASM3395487v1_genomic	present	present	present	present	present
GCF_027676765.1_ASM2767676v1_genomic	present	present	present	present	present
GCF_020405655.1_ASM2040565v1_genomic	present	present	present	present	present
GCF_027667845.1_ASM2766784v1_genomic	present	present	present	present	present
GCF_029600435.1_ASM2960043v1_genomic	present	present	present	present	present
GCF_031737195.1_ASM3173719v1_genomic	present	present	present	present	present
GCF_027675645.1_ASM2767564v1_genomic	present	present	present	present	present
GCF_027675725.1_ASM2767572v1_genomic	present	present	present	present	present
GCF_027675735.1_ASM2767573v1_genomic	present	present	present	present	present
GCF_027675745.1_ASM2767574v1_genomic	present	present	present	present	present
GCF_027675915.1_ASM2767591v1_genomic	present	present	present	present	present
GCF_027676665.1_ASM2767666v1_genomic	present	present	present	present	present
GCF_027686015.1_ASM2768601v1_genomic	present	present	present	present	present
GCF_027676705.1_ASM2767670v1_genomic	present	present	absent	present	present
GCF_026183815.1_ASM2618381v1_genomic	present	present	absent	present	present
GCF_026183835.1_ASM2618383v1_genomic	present	present	absent	present	present
GCF_016767645.1_ASM1676764v1_genomic	present	present	present	present	present
GCF_039564165.1_ASM3956416v1_genomic	present	present	present	present	present
GCF_016599235.1_ASM1659923v1_genomic	present	present	present	present	present
GCF_029599645.1_ASM2959964v1_genomic	present	present	present	present	present
GCF_029599665.1_ASM2959966v1_genomic	present	present	present	present	present
GCF_009735435.1_ASM973543v1_genomic	present	present	present	present	present
GCF_019203145.1_ASM1920314v1_genomic	present	present	present	present	present
GCF_027672545.1_ASM2767254v1_genomic	present	present	present	present	present
GCF_030490365.1_ASM3049036v1_genomic	present	present	present	present	present
GCF_039564095.1_ASM3956409v1_genomic	present	present	present	present	present
GCF_016767675.1_ASM1676767v1_genomic	present	present	present	present	present
GCF_019967715.1_ASM1996771v1_genomic	present	present	present	present	present
GCF_029600375.1_ASM2960037v1_genomic	present	present	present	present	present
GCF_029599855.1_ASM2959985v1_genomic	present	present	present	present	present
GCF_018397255.1_ASM1839725v1_genomic	present	present	present	present	present
GCF_018397395.1_ASM1839739v1_genomic	present	present	present	present	present
GCF_026183795.1_ASM2618379v1_genomic	present	present	present	present	present
GCF_029600035.1_ASM2960003v1_genomic	present	present	present	present	present
GCF_029599755.1_ASM2959975v1_genomic	present	present	present	present	present
GCF_029599475.1_ASM2959947v1_genomic	present	present	present	present	present
GCF_018397285.1_ASM1839728v1_genomic	present	present	present	present	present
GCF_018397435.1_ASM1839743v1_genomic	present	present	present	present	present
GCF_020556865.1_ASM2055686v1_genomic	present	present	present	present	present
GCF_029624375.1_ASM2962437v1_genomic	present	present	present	present	present
GCF_029624325.1_ASM2962432v1_genomic	present	present	present	present	present
GCF_027676695.1_ASM2767669v1_genomic	present	present	present	present	present
GCF_028826015.1_ASM2882601v1_genomic	present	present	absent	present	present
GCF_029600525.1_ASM2960052v1_genomic	present	present	present	present	present
GCF_009735475.1_ASM973547v1_genomic	present	present	present	absent	present
GCF_020405675.1_ASM2040567v1_genomic	present	present	present	absent	present
GCF_024581245.1_ASM2458124v1_genomic	present	present	present	absent	present
GCF_029624545.1_ASM2962454v1_genomic	present	present	present	absent	present
GCF_029624215.1_ASM2962421v1_genomic	present	present	present	absent	present
GCF_029599485.1_ASM2959948v1_genomic	present	present	present	absent	present
GCF_027679445.1_ASM2767944v1_genomic	present	present	present	absent	present
GCF_027676425.1_ASM2767642v1_genomic	present	present	present	absent	present
GCF_029624295.1_ASM2962429v1_genomic	present	absent	absent	absent	present
GCF_029624455.1_ASM2962445v1_genomic	present	absent	absent	absent	present
GCF_029624485.1_ASM2962448v1_genomic	present	absent	absent	absent	present
GCF_029624585.1_ASM2962458v1_genomic	present	absent	absent	absent	present
GCF_019662365.1_ASM1966236v1_genomic	present	present	present	absent	present
GCF_019662445.1_ASM1966244v1_genomic	present	present	present	absent	present
GCF_022509665.1_ASM2250966v1_genomic	present	present	present	present	present
GCF_027691115.1_ASM2769111v1_genomic	present	present	present	present	present
GCF_027691285.1_ASM2769128v1_genomic	present	present	present	present	present
GCF_020556885.1_ASM2055688v1_genomic	present	present	absent	present	absent
GCF_027685895.1_ASM2768589v1_genomic	present	present	present	present	absent
GCF_029600055.1_ASM2960005v1_genomic	present	present	present	present	absent
GCF_041195995.1_ASM4119599v1_genomic	present	present	present	present	absent
GCF_027723505.1_ASM2772350v1_genomic	present	present	present	present	absent
GCF_029599805.1_ASM2959980v1_genomic	present	present	present	present	absent
GCF_027672745.1_ASM2767274v1_genomic	present	present	present	present	absent
GCF_027693085.1_ASM2769308v1_genomic	present	present	present	present	absent
GCF_029600115.1_ASM2960011v1_genomic	present	present	present	present	absent
GCF_018397625.1_ASM1839762v1_genomic	present	present	present	present	absent
GCF_019662205.1_ASM1966220v1_genomic	present	present	present	present	absent
GCF_019662335.1_ASM1966233v1_genomic	present	present	present	present	absent
GCF_040096765.1_ASM4009676v1_genomic	present	present	present	present	absent
GCF_039564125.1_ASM3956412v1_genomic	present	present	present	present	absent
GCF_039564145.1_ASM3956414v1_genomic	present	present	present	present	absent
GCF_017942505.1_ASM1794250v1_genomic	present	present	present	present	absent
GCF_018397535.1_ASM1839753v1_genomic	present	present	present	present	absent
GCF_018397835.1_ASM1839783v1_genomic	present	present	present	present	absent
GCF_019343125.1_ASM1934312v1_genomic	present	present	present	present	absent
GCF_019659145.1_ASM1965914v1_genomic	present	present	present	present	absent
GCF_019662465.1_ASM1966246v1_genomic	present	present	present	present	absent
GCF_019659185.1_ASM1965918v1_genomic	present	present	present	present	absent
GCF_019662145.1_ASM1966214v1_genomic	present	present	present	present	absent
GCF_019662385.1_ASM1966238v1_genomic	present	present	present	present	absent
GCF_019662395.1_ASM1966239v1_genomic	present	present	present	present	absent
GCF_020405785.1_ASM2040578v1_genomic	present	present	present	present	absent
GCF_020406915.1_ASM2040691v1_genomic	present	present	present	present	absent
GCF_020405775.1_ASM2040577v1_genomic	present	present	present	present	absent
GCF_020405935.1_ASM2040593v1_genomic	present	present	present	present	absent
GCF_022509645.1_ASM2250964v1_genomic	present	present	present	present	absent
GCF_023653355.1_ASM2365335v1_genomic	present	present	present	present	absent
GCF_027925905.1_ASM2792590v1_genomic	present	present	present	present	absent
GCF_027667265.1_ASM2766726v1_genomic	present	present	present	present	absent
GCF_027678895.1_ASM2767889v1_genomic	present	present	present	present	absent
GCF_027679825.1_ASM2767982v1_genomic	present	present	present	present	absent
GCF_029599495.1_ASM2959949v1_genomic	present	present	present	present	absent
GCF_029600005.1_ASM2960000v1_genomic	present	present	present	present	absent
GCF_029599995.1_ASM2959999v1_genomic	present	present	present	present	absent
GCF_029600175.1_ASM2960017v1_genomic	present	present	present	present	absent
GCF_029600085.1_ASM2960008v1_genomic	present	present	present	present	absent
GCF_029600455.1_ASM2960045v1_genomic	present	present	present	present	absent
GCF_029600075.1_ASM2960007v1_genomic	present	present	present	present	absent
GCF_029599955.1_ASM2959995v1_genomic	present	present	present	present	absent
GCF_029599795.1_ASM2959979v1_genomic	present	present	present	present	absent
GCF_029599965.1_ASM2959996v1_genomic	present	present	present	present	absent
GCF_029600495.1_ASM2960049v1_genomic	present	present	present	present	absent
GCF_029599905.1_ASM2959990v1_genomic	present	present	present	present	absent
GCF_030237875.1_ASM3023787v1_genomic	present	present	present	present	absent
GCF_032436005.1_ASM3243600v1_genomic	present	present	present	present	absent
GCF_036324345.1_ASM3632434v1_genomic	present	present	present	present	absent
GCF_030769805.1_ASM3076980v1_genomic	present	present	present	present	absent
GCF_019662405.1_ASM1966240v1_genomic	present	present	present	present	absent
GCF_020405965.1_ASM2040596v1_genomic	present	present	present	present	absent
GCF_020405815.1_ASM2040581v1_genomic	present	present	present	present	absent
GCF_026183775.1_ASM2618377v1_genomic	present	present	present	present	absent
GCF_026183755.1_ASM2618375v1_genomic	present	present	present	present	absent
GCF_031929285.1_ASM3192928v1_genomic	present	present	present	present	absent
GCF_027687325.1_ASM2768732v1_genomic	present	present	present	present	absent
GCF_029599935.1_ASM2959993v1_genomic	present	present	present	present	absent
GCF_029600235.1_ASM2960023v1_genomic	present	present	present	present	absent
GCF_029599735.1_ASM2959973v1_genomic	present	present	present	present	absent
GCF_032842905.1_ASM3284290v1_genomic	present	present	present	present	absent
GCF_039564195.1_ASM3956419v1_genomic	present	present	present	present	absent
GCF_018397325.1_ASM1839732v1_genomic	present	present	present	present	absent
GCF_029599765.1_ASM2959976v1_genomic	present	present	present	present	absent
GCF_029600195.1_ASM2960019v1_genomic	present	present	present	present	absent
GCF_029600205.1_ASM2960020v1_genomic	present	present	present	present	absent
GCF_009735405.1_ASM973540v1_genomic	present	present	present	present	absent
GCF_018069825.1_ASM1806982v1_genomic	present	present	present	present	absent
GCF_019662245.1_ASM1966224v1_genomic	present	present	present	present	absent
GCF_020406935.1_ASM2040693v1_genomic	present	present	present	present	absent
GCF_021122525.1_ASM2112252v1_genomic	present	present	present	present	absent
GCF_022586915.1_ASM2258691v1_genomic	present	present	present	present	absent
GCF_027667605.1_ASM2766760v1_genomic	present	present	present	present	absent
GCF_027668185.1_ASM2766818v1_genomic	present	present	present	present	absent
GCF_027670765.1_ASM2767076v1_genomic	present	present	present	present	absent
GCF_027670925.1_ASM2767092v1_genomic	present	present	present	present	absent
GCF_027673865.1_ASM2767386v1_genomic	present	present	present	present	absent
GCF_027684345.1_ASM2768434v1_genomic	present	present	present	present	absent
GCF_027687855.1_ASM2768785v1_genomic	present	present	present	present	absent
GCF_027688035.1_ASM2768803v1_genomic	present	present	present	present	absent
GCF_027691345.1_ASM2769134v1_genomic	present	present	present	present	absent
GCF_027692905.1_ASM2769290v1_genomic	present	present	present	present	absent
GCF_027693025.1_ASM2769302v1_genomic	present	present	present	present	absent
GCF_027693985.1_ASM2769398v1_genomic	present	present	present	present	absent
GCF_028613905.1_ASM2861390v1_genomic	present	present	present	present	absent
GCF_029600395.1_ASM2960039v1_genomic	present	present	present	present	absent
GCF_029733755.1_ASM2973375v1_genomic	present	present	present	present	absent
GCF_040092855.1_ASM4009285v1_genomic	present	present	present	present	absent
GCF_040745045.1_ASM4074504v1_genomic	present	present	present	present	absent
GCF_041196885.1_ASM4119688v1_genomic	present	present	present	present	absent
GCF_017356435.1_ASM1735643v1_genomic	present	present	present	present	absent
GCF_018397485.1_ASM1839748v1_genomic	present	present	present	present	absent
GCF_018397455.1_ASM1839745v1_genomic	present	present	present	present	absent
GCF_018397225.1_ASM1839722v1_genomic	present	present	absent	present	absent
GCF_018397315.1_ASM1839731v1_genomic	present	present	absent	present	absent
GCF_018397375.1_ASM1839737v1_genomic	present	present	absent	present	absent
GCF_018397515.1_ASM1839751v1_genomic	present	present	absent	present	absent
GCF_018397655.1_ASM1839765v1_genomic	present	present	absent	present	absent
GCF_018397675.1_ASM1839767v1_genomic	present	present	absent	present	absent
GCF_018397695.1_ASM1839769v1_genomic	present	present	absent	present	absent
GCF_018397745.1_ASM1839774v1_genomic	present	present	absent	present	absent
GCF_018397815.1_ASM1839781v1_genomic	present	present	absent	present	absent
GCF_029599865.1_ASM2959986v1_genomic	present	present	absent	present	absent
GCF_029624415.1_ASM2962441v1_genomic	present	present	present	present	absent
GCF_021229185.1_ASM2122918v1_genomic	present	present	absent	present	absent
GCF_035791855.1_ASM3579185v1_genomic	present	present	present	present	absent
GCF_009735445.1_ASM973544v1_genomic	present	present	present	present	absent
GCF_023956365.1_ASM2395636v1_genomic	present	present	present	present	absent
GCF_031929825.1_ASM3192982v1_genomic	present	present	present	present	absent
GCF_019880345.1_ASM1988034v1_genomic	present	absent	present	present	absent
GCF_029600135.1_ASM2960013v1_genomic	present	absent	present	present	absent
GCF_035791835.1_ASM3579183v1_genomic	present	absent	absent	present	absent
GCF_031929745.1_ASM3192974v1_genomic	present	present	present	present	absent
GCF_020593395.1_ASM2059339v1_genomic	present	present	present	present	absent
GCF_018397275.1_ASM1839727v1_genomic	present	present	present	present	absent
GCF_018397545.1_ASM1839754v1_genomic	present	present	present	present	absent
GCF_018397595.1_ASM1839759v1_genomic	present	present	present	present	absent
GCF_016767595.1_ASM1676759v1_genomic	present	present	present	present	absent
GCF_016767615.1_ASM1676761v1_genomic	present	present	present	present	absent
GCF_016767535.1_ASM1676753v1_genomic	present	present	absent	present	absent
GCF_018397355.1_ASM1839735v1_genomic	present	present	present	present	absent
GCF_029600255.1_ASM2960025v1_genomic	present	present	present	present	absent
GCF_020268645.1_ASM2026864v1_genomic	present	present	present	present	absent
GCF_029599525.1_ASM2959952v1_genomic	present	present	present	present	absent
GCF_027687255.1_ASM2768725v1_genomic	present	present	absent	present	absent
GCF_027675805.1_ASM2767580v1_genomic	present	present	present	present	absent
GCF_027675565.1_ASM2767556v1_genomic	present	present	present	present	absent
GCF_027676495.1_ASM2767649v1_genomic	present	present	present	present	absent
GCF_027676385.1_ASM2767638v1_genomic	present	present	absent	present	absent
GCF_027925885.1_ASM2792588v1_genomic	present	absent	absent	present	absent
GCF_028888065.1_ASM2888806v1_genomic	present	present	present	present	absent
GCF_029600155.1_ASM2960015v1_genomic	present	present	present	present	absent
GCF_029599555.1_ASM2959955v1_genomic	present	present	present	present	absent
GCF_029599635.1_ASM2959963v1_genomic	present	present	present	present	absent
GCF_029599655.1_ASM2959965v1_genomic	present	present	present	present	absent
GCF_029599895.1_ASM2959989v1_genomic	present	present	present	present	absent
GCF_964208315.1_FFMG_393-11-21-Q17.1_genomic	present	present	absent	present	absent
GCF_041196225.1_ASM4119622v1_genomic	present	present	present	present	absent
GCF_041196135.1_ASM4119613v1_genomic	present	present	present	present	absent
GCF_041196105.1_ASM4119610v1_genomic	present	present	present	present	absent
GCF_030815165.1_ASM3081516v1_genomic	present	present	present	absent	absent
GCF_035794475.1_ASM3579447v1_genomic	present	present	present	absent	absent
GCF_015751045.1_ASM1575104v1_genomic	present	present	present	absent	absent
GCF_020593225.1_ASM2059322v1_genomic	present	present	present	absent	absent
GCF_016767575.1_ASM1676757v1_genomic	present	present	present	absent	absent
GCF_016767495.1_ASM1676749v1_genomic	present	present	present	absent	absent
GCF_009735495.1_ASM973549v1_genomic	present	present	present	absent	absent
GCF_015904215.1_ASM1590421v1_genomic	present	present	present	absent	absent
GCF_018397385.1_ASM1839738v1_genomic	present	present	present	absent	absent
GCF_019662215.1_ASM1966221v1_genomic	present	present	present	absent	absent
GCF_019659205.1_ASM1965920v1_genomic	present	present	present	absent	absent
GCF_029600465.1_ASM2960046v1_genomic	present	present	present	absent	absent
GCF_018069745.1_ASM1806974v1_genomic	present	present	present	absent	absent
GCF_016863785.1_ASM1686378v1_genomic	present	present	present	absent	absent
GCF_020405685.1_ASM2040568v1_genomic	present	present	present	absent	absent
GCF_031929645.1_ASM3192964v1_genomic	present	present	present	absent	absent
GCF_030769865.1_ASM3076986v1_genomic	present	present	present	absent	absent
GCF_041196595.1_ASM4119659v1_genomic	present	present	present	absent	absent
GCF_015751065.1_ASM1575106v1_genomic	present	present	present	absent	absent
GCF_016767635.1_ASM1676763v1_genomic	present	present	present	absent	absent
GCF_029599835.1_ASM2959983v1_genomic	present	present	present	absent	absent
GCF_018397615.1_ASM1839761v1_genomic	present	present	present	absent	absent
GCF_015767715.1_ASM1576771v1_genomic	present	present	present	absent	absent
GCF_035794575.1_ASM3579457v1_genomic	present	present	present	absent	absent
GCF_029600515.1_ASM2960051v1_genomic	present	present	present	absent	absent
GCF_027687165.1_ASM2768716v1_genomic	present	present	present	absent	absent
GCF_031929605.1_ASM3192960v1_genomic	present	present	present	absent	absent
GCF_033022735.1_ASM3302273v1_genomic	present	present	present	absent	absent
GCF_005116555.1_ASM511655v1_genomic	present	present	absent	absent	absent
GCF_013867815.1_ASM1386781v1_genomic	present	present	absent	absent	absent
GCF_015751085.1_ASM1575108v1_genomic	present	present	absent	absent	absent
GCF_016767515.1_ASM1676751v1_genomic	present	present	absent	absent	absent
GCF_016767545.1_ASM1676754v1_genomic	present	present	absent	absent	absent
GCF_018397575.1_ASM1839757v1_genomic	present	present	absent	absent	absent
GCF_018397715.1_ASM1839771v1_genomic	present	present	absent	absent	absent
GCF_018397725.1_ASM1839772v1_genomic	present	present	absent	absent	absent
GCF_018397765.1_ASM1839776v1_genomic	present	present	absent	absent	absent
GCF_018397795.1_ASM1839779v1_genomic	present	present	absent	absent	absent
GCF_023612275.1_ASM2361227v1_genomic	present	present	absent	absent	absent
GCF_027660865.1_ASM2766086v1_genomic	present	present	absent	absent	absent
GCF_027676575.1_ASM2767657v1_genomic	present	present	absent	absent	absent
GCF_029600315.1_ASM2960031v1_genomic	present	present	absent	absent	absent
GCF_029600385.1_ASM2960038v1_genomic	present	present	absent	absent	absent
GCF_033954895.1_ASM3395489v1_genomic	present	present	absent	absent	absent
GCF_033954915.1_ASM3395491v1_genomic	present	present	absent	absent	absent
GCF_036669985.1_ASM3666998v1_genomic	present	present	absent	absent	absent
GCF_041196675.1_ASM4119667v1_genomic	present	present	absent	absent	absent

## Sheet: E_mundtii
Gene	aac6
Annotation	aminoglycoside N-acetyltransferase AAC(6')-Ii
E_mudtii_766	present
GCF_000393815.1_Ente_mund_ATCC882_V1_genomic	present
GCF_000407465.1_Ente_mund_ATCC882_V2_genomic	present
GCF_002216705.1_ASM221670v1_genomic	present
GCF_002798425.1_ASM279842v1_genomic	present
GCF_001675535.1_ASM167553v1_genomic	present
GCF_000504125.1_ASM50412v1_genomic	present
GCF_005158285.1_ASM515828v1_genomic	present
GCF_013394305.1_ASM1339430v1_genomic	present
GCF_020406015.1_ASM2040601v1_genomic	present
GCF_039752135.1_ASM3975213v1_genomic	present
GCF_039752155.1_ASM3975215v1_genomic	present
GCF_039752175.1_ASM3975217v1_genomic	present
GCF_039752195.1_ASM3975219v1_genomic	present
GCF_039752215.1_ASM3975221v1_genomic	present
GCF_040150775.1_ASM4015077v1_genomic	present
GCF_040430785.1_ASM4043078v1_genomic	present
GCF_001990645.1_ASM199064v1_genomic	present
GCF_012935515.1_ASM1293551v1_genomic	present
GCF_902387675.1_UHGG_MGYG-HGUT-02493_genomic	present
GCF_001705215.1_ASM170521v1_genomic	present
GCF_001886035.1_ASM188603v1_genomic	present
GCF_002813755.1_ASM281375v1_genomic	present
GCF_003048305.1_ASM304830v1_genomic	present
GCF_004167255.1_ASM416725v1_genomic	present
GCF_007990125.1_ASM799012v1_genomic	present
GCF_009890745.1_ASM989074v1_genomic	present
GCF_009890755.1_ASM989075v1_genomic	present
GCF_009890785.1_ASM989078v1_genomic	present
GCF_009890805.1_ASM989080v1_genomic	present
GCF_009890815.1_ASM989081v1_genomic	present
GCF_009890825.1_ASM989082v1_genomic	present
GCF_009890865.1_ASM989086v1_genomic	present
GCF_009890875.1_ASM989087v1_genomic	present
GCF_009890905.1_ASM989090v1_genomic	present
GCF_009890915.1_ASM989091v1_genomic	present
GCF_009890935.1_ASM989093v1_genomic	present
GCF_009890985.1_ASM989098v1_genomic	present
GCF_009893025.1_ASM989302v1_genomic	present
GCF_009906575.1_ASM990657v1_genomic	present
GCF_022048965.1_ASM2204896v1_genomic	present
GCF_028317595.1_ASM2831759v1_genomic	present
GCF_900114755.1_IMG-taxon_2606217799_annotated_assembly_genomic	present
GCF_900447995.1_46514_F01_genomic	present
GCF_902164745.1_25426_7_354_genomic	present
GCF_931972305.1_P2005_genomic	present
GCF_002141315.1_ASM214131v1_genomic	present
GCF_002944895.1_ASM294489v1_genomic	present
GCF_003048275.1_ASM304827v1_genomic	present
GCF_009659805.1_ASM965980v1_genomic	present
GCF_022836415.1_ASM2283641v1_genomic	present
GCF_015230405.1_ASM1523040v1_genomic	present
GCF_015550885.1_ASM1555088v1_genomic	present
GCF_015551665.1_ASM1555166v1_genomic	present
GCF_015555705.1_ASM1555570v1_genomic	present
GCF_017356615.1_ASM1735661v1_genomic	present
GCF_028317585.1_ASM2831758v1_genomic	present
GCF_033141225.1_ASM3314122v1_genomic	present
GCF_037002805.1_ASM3700280v1_genomic	present
GCF_020149485.1_ASM2014948v1_genomic	present
GCF_039837675.1_ASM3983767v1_genomic	absent
