# Supplementary material for: Genome-Resolved In Silico Analysis of Poultry and Swine Lactobacillales Provides a Data- Driven Framework for Elucidating Metabolic Synergies in Multi-Strain Probiotics
Source: Research Square preprint supplement (doi:10.21203/rs.3.rs-7234892/v1), 2025-08-12
Supplement: Supplementary file 4 [file 8edee2fb9f3ccc6ca37d7cfe.xlsx]

## Sheet: TS7
CAZymes	Enterococcus mundtii 766	Enterococcus lactis m3d	Ligilactobacillus agilis 1126	Limosilactobacillus reuteri A1A	Limosilactobacillus vaginalis 5121
AA1	0	0	0	0	1
AA10	4	2	0	0	0
CBM5	1	0	0	0	0
CBM32	1	0	0	0	0
CBM34	1	1	2	0	0
CBM48	0	0	1	0	0
CBM50	7	5	5	6	5
CBM61	1	1	0	0	0
CBM91	1	0	0	0	0
CE1	2	1	5	0	0
CE2	0	0	0	1	1
CE4	0	1	1	0	0
CE8	0	1	0	0	0
CE9	1	1	1	0	0
CE12	0	1	0	0	0
CE19	0	1	0	0	0
GH1	9	9	5	0	0
GH2	1	1	1	1	1
GH3	0	0	1	0	0
GH4	2	2	0	0	0
GH8	0	0	0	1	0
GH13	4	4	8	2	1
GH18	3	1	0	0	0
GH20	1	0	0	0	0
GH23	3	1	2	1	1
GH25	1	0	3	1	3
GH28	0	2	0	0	0
GH31	1	0	0	1	0
GH32	1	0	2	0	0
GH35	1	1	0	0	0
GH36	2	1	2	1	1
GH38	2	2	0	0	0
GH42	1	0	0	0	0
GH43	2	1	0	1	0
GH51	2	0	0	0	0
GH53	1	1	0	1	0
GH65	1	1	1	1	1
GH68	0	0	0	1	1
GH73	8	6	3	5	4
GH85	1	0	0	0	0
GH88	2	1	0	0	0
GH92	1	1	0	0	0
GH105	1	1	0	0	0
GH120	0	0	0	0	0
GH125	1	1	0	0	0
GH154	1	1	0	0	0
GH170	3	2	0	0	0
GH177	0	1	0	0	0
GH179	2	1	0	0	0
GT1	0	0	0	0	0
GT2	11	12	15	11	9
GT4	4	4	8	6	12
GT8	2	2	1	1	5
GT14	0	0	0	1	1
GT26	0	0	1	0	0
GT28	1	1	1	1	1
GT32	0	0	1	1	0
GT35	0	0	1	0	0
GT51	3	3	4	2	2
GT101	0	0	1	0	1
GT111	0	0	2	2	1
GT113	0	0	5	0	3
PL8	1	0	0	0	0
PL9	0	1	0	0	0
PL33	1	0	0	0	0
	100	80	83	49	55
