# Supplementary material for: Genome-Resolved In Silico Analysis of Poultry and Swine Lactobacillales Provides a Data- Driven Framework for Elucidating Metabolic Synergies in Multi-Strain Probiotics
Source: Research Square preprint supplement (doi:10.21203/rs.3.rs-7234892/v1), 2025-08-12
Supplement: Supplementary file 5 [file a2d03ccc5e57601f6291c4df.xlsx]

## Sheet: TS8
UNIPROT ID	Pfam	PANTHER	NCBIfam
P76461	PF00108,PF02803	PTHR18919	TIGR01930
P0A7I7	PF00925	PTHR21327	TIGR00505
P0A7J0	PF00926	PTHR21327	TIGR00506
P17618	PF00383,PF01872	PTHR38011	-
P75809	PF08282	PTHR10000	TIGR00099
P11998	PF00885	PTHR21058	TIGR00114
P0AFU8	PF00677	PTHR21098	TIGR00187
P10902	PF00890,PF02910	PTHR42716	TIGR00551
P11458	PF02445	PTHR30573	TIGR00550
P30011	PF01729,PF02749	PTHR32179	TIGR00078
O26253	PF01467	PTHR21342	TIGR00125
P0A752	PF01467	PTHR39321	-
P18843	PF02540	PTHR23090	TIGR00552
P77808	-	-	TIGR00200
P0A7B3	PF01513,PF20143	PTHR20275	-
P18133	PF04095,PF17767	PTHR11098	-
P0AF24	PF13242,PF13344	PTHR19288	TIGR01460
P0ABP8	PF01048	PTHR43691	TIGR00107
P21369	PF00857	PTHR11080	-
P00381	PF00186	PTHR48069	-
P0AC16	PF02152	PTHR42844	TIGR00525,TIGR00526
P08192	PF02875,PF08245	PTHR11136	TIGR01499
P0A6T5	PF01227	PTHR11109	TIGR00063
P26281	PF01288	PTHR43071	-
P0AC13	PF00809	PTHR20941	TIGR01496
P0A7I7	-	PTHR21327	-
P38051	PF00425	PTHR42839	TIGR00543
P17109	PF02775,PF02776,PF16582	PTHR42916	TIGR00173
P37355	-	-	TIGR03695
P29208	-	-	TIGR01928
P37353	-	-	TIGR01923
P0ABU0	PF00378	PTHR43113	TIGR01929
P32166	-	PTHR13929	-
P0A887	PF01209	PTHR43591	TIGR01934
Q05603	PF02277	PTHR43463	TIGR03160
Q9HIJ2	PF00300	PTHR48100	-
Q05602	PF02654	PTHR34148	-
O34899	PF01923	PTHR12213	-
P29932	PF01656,PF07685	PTHR21343	TIGR00313
P9WP93	PF03186	PTHR34308	TIGR00380
Q05599	PF02283	PTHR34848	-
P0AFC0	PF00293	PTHR21340	-
P13702	PF00368	PTHR10572	TIGR00532
P07277	PF00288	PTHR43290	TIGR00549
Q8DR49	PF00288	PTHR31814	-
Q746I8	PF01070	PTHR43665	TIGR02151
Q9FD73	PF00288,PF18376	PTHR10977	TIGR01240
Q9FD71	PF01154,PF08540	PTHR43323	-
