# Supplementary material for: Genome-Resolved In Silico Analysis of Poultry and Swine Lactobacillales Provides a Data- Driven Framework for Elucidating Metabolic Synergies in Multi-Strain Probiotics
Source: Research Square preprint supplement (doi:10.21203/rs.3.rs-7234892/v1), 2025-08-12
Supplement: Supplementary file 6 [file a92e8f4065436c41443e492d.xlsx]

## Sheet: E_lactis
Assembly Accession	LOCUS	Bacteriocin (BAGEL4)	Sequences
GCF_015751045.1	NZ_BNJW010000231.350.AOI_01	63.3;Enterolysin_A	METQNESLIKQYVKRRAKRRLFLWLFGTSAGLMTILITVFVTLFLILAAGSIDNSDSDSSSGGEAFTGEYSEGLPIYKEIKGRGPFSDEIAQYAVGAAVKYKLLPSVILSQYGYESAFGTSLSAKNDLNFFGITWFDGCLFPKGTARGIGGIEGGWYMKFPNSKAAFSYYGFMVATQSNFNASVGNKSPGVSLLILGRGGYAAAGITEDSPYYTGCMSIITSNKLTEYDELAIKHWGEGGNNNGTITGEWMNPFPGSSLDKSSFSGGQLFGTNPGGEFRPNGFHDGLDFGSVDHPGSEIHAVHGGKVVYVGNPGISGLGACVIVINYDGLNMVYQEFANSTGNSRVKVGDQVKVGQVIGIRDTAHLHLGFTRMDWRQAQGHAFTDDGTWIDPLPFLNSS…	ATGGAAACCCAAAATGAAAGTTTAATCAAGCAGTATGTTAAGCGTCGTGCAAAGCGGCGCTTATTTTTGTGGTTGTTTGGTACTTCTGCAGGTTTGATGACTATTTTGATCACTGTGTTTGTGACCCTATTTCTAATACTTGCCGCGGGATCGATTGATAATTCGGATTCAGATTCAAGCAGTGGTGGCGAAGCTTTTACAGGAGAATATTCGGAAGGATTACCCATTTATAAAGAAATCAAAGGAAGAGGCCCTTTTTCTGATGAAATTGCGCAATATGCTGTAGGTGCAGCAGTGAAATACAAATTATTGCCAAGTGTGATCCTATCGCAATACGGGTATGAATCGGCATTTGGAACGTCTCTATCTGCTAAAAACGACTTGAATTTTTTCGGAATT…
GCF_015751085.1	NZ_BNJY010000111.456.AOI_01	81.2;Enterocin_A	MKHLKILSIKETQLIYGGTTHSGKYYGNGVYCTKNKCTVDWAKATTCIAGMSIGGFLGGAIPGKC	ATGAAACATTTAAAAATTTTGTCTATTAAAGAGACACAACTTATCTATGGGGGTACCACTCATAGTGGAAAATATTATGGAAATGGAGTGTATTGCACTAAAAATAAATGTACGGTCGATTGGGCCAAGGCAACTACTTGTATTGCAGGAATGTCTATAGGTGGTTTTTTAGGTGGAGCAATTCCAGGGAAGTGC
GCF_015751085.1	NZ_BNJY010000151.439.AOI_01	91.2;Enterocin_P	MKRKLFSLALIGMFGLVVTGFGTKVDAATRSYGNGVYCNDDKCWVNWNEANQQIAGIVISGWASGLAGA	ATGAAAAGAAAATTATTTAGTTTAGCTCTTATCGGAATGTTTGGGTTAGTAGTGACAGGTTTTGGTACAAAAGTTGATGCAGCTACACGTTCATATGGTAATGGTGTTTATTGTAATGATGATAAATGCTGGGTGAACTGGAATGAAGCAAATCAACAAATCGCTGGAATTGTGATTAGTGGTTGGGCTTCTGGTTTGGCAGGTGCA
GCF_015751085.1	NZ_BNJY010000181.434.AOI_01	63.3;Enterolysin_A	MENQNESLIKQYVKRRAKRRLFLWLFGTSAGLMTILITVFVTLFLILAAGSIDNSDSDSSSGGEAFTGEYSEGLPIYKEIKGRGPFSDEIAQYAVGAAVKYKLLPSVILSQYGYESAFGTSASARNDLNYFGITWFDGCLFPKGTARGIGGIEGSWYMKFPNSKAAFSYYGFMVATQSNFNACVGNKSPGASLLILGRGGYAAAGITEDSPYYTGCMSIITSNKLTEYDEFAIKHWGEGNNNNGTITGEWTNPFPGSSLDKSSFSGGQLFGTNPWGEFRPNGFHDGLDFGSVDHPGSEIHAVHGGKVVYVGNPGISGLGACVIVINYDDLNMVYQEFANSTGNSRVKVGDQVKVGQVIGIRDTAHLHLGFTRMDWRQAQGHAFTDDGTWIDPLPFLNSS…	ATGGAAAACCAAAATGAAAGTTTAATCAAGCAGTATGTTAAGCGTCGTGCAAAGCGGCGCTTATTTTTGTGGTTGTTTGGTACTTCTGCAGGTTTGATGACTATTTTGATCACTGTGTTTGTGACCCTATTTCTAATACTTGCCGCGGGATCGATTGATAATTCGGATTCAGATTCAAGCAGTGGTGGCGAAGCTTTTACAGGAGAATATTCGGAAGGATTACCCATTTATAAAGAAATCAAAGGAAGAGGCCCTTTTTCTGATGAAATTGCGCAATATGCTGTAGGTGCAGCAGTGAAATATAAATTATTACCAAGTGTGATTCTTTCGCAATACGGTTATGAATCAGCGTTTGGTACGTCGGCGTCCGCAAGAAATGATCTCAACTATTTTGGGATT…
GCF_023612275.1	NZ_CP0637661.5200.AOI_01	81.2;Enterocin_A	MKHLKILSIKETQLIYGGTTHSGKYYGNGVYCTKNKCTVDWAKATTCIAGMSIGGFLGGAIPGKC	ATGAAACATTTAAAAATTTTGTCTATTAAAGAGACACAACTTATCTATGGGGGTACCACTCATAGTGGAAAATATTATGGAAATGGAGTGTATTGCACTAAAAATAAATGTACGGTCGATTGGGCCAAGGCAACTACTTGTATTGCAGGAATGTCTATAGGTGGTTTTTTAGGTGGAGCAATTCCAGGGAAGTGC
GCF_023612275.1	NZ_CP0637661.5200.AOI_01	113.2;Lactacin_F,subunit_lafX	MHIKNTKTTFILSSEELKNIQGGSAVGVLGTTFSGATAGVKLCSAGGPYAIAACGVGGALLGAGFGMWTGAVNNx	ATGCATATTAAAAACACAAAAACAACATTTATATTATCTTCAGAAGAGTTGAAAAATATTCAAGGTGGGAGTGCCGTGGGAGTTTTAGGCACTACTTTTTCTGGGGCAACAGCAGGAGTAAAACTTTGTTCAGCCGGAGGACCTTATGCAATAGCTGCTTGTGGTGTAGGTGGAGCTTTATTAGGTGCTGGATTCGGCATGTGGACCGGTGCCGTAAACAATTAA
GCF_023612275.1	NZ_CP0637661.5200.AOI_02	91.2;Enterocin_P	MKRKLFSLALIGMFGLVVTGFGTKVDAATRSYGNGVYCNDDKCWVNWNEANQQIAGIVISGWASGLAGA	ATGAAAAGAAAATTATTTAGTTTAGCTCTTATCGGAATGTTTGGGTTAGTAGTGACAGGTTTTGGTACAAAAGTTGATGCAGCTACACGTTCATATGGTAATGGTGTTTATTGTAATGATGATAAATGCTGGGTGAACTGGAATGAAGCAAATCAACAAATCGCTGGAATTGTGATTAGTGGTTGGGCTTCTGGTTTGGCAGGTGCA
GCF_019203145.1	NZ_CP0780951.2881.AOI_01	95.2;Enterocin_SE-K4	LILGIVLLSVSTLGITVDAATYYGNGVYCNTQKCWVDWSRARSEIVDRGVKAYVNGFTKVLGGVGGR	TTGATTTTAGGAATTGTTTTATTGAGTGTATCTACTTTAGGAATTACAGTAGATGCTGCAACTTATTATGGAAATGGTGTTTATTGTAATACTCAAAAATGTTGGGTAGATTGGAGTAGAGCTCGCTCTGAGATTGTTGATAGAGGAGTAAAAGCTTACGTTAATGGTTTTACGAAAGTGCTAGGTGGAGTCGGTGGAAGA
GCF_019203145.1	NZ_CP0780951.2881.AOI_02	91.2;Enterocin_P	MRKKLFSLALIGIFGLVVTNFGTKVDAATRSYGNGVYCNNSKCWVNWGEAKENIAGIVISGWASGLAGMGH	ATGAGAAAAAAATTATTTAGTTTAGCTCTTATTGGAATATTTGGGTTAGTTGTGACAAATTTTGGTACAAAAGTTGATGCAGCTACGCGTTCATATGGTAATGGTGTTTATTGTAATAATAGTAAATGCTGGGTTAACTGGGGAGAAGCTAAAGAGAATATTGCAGGAATCGTTATTAGTGGCTGGGCTTCTGGTTTGGCAGGTATGGGACAT
GCF_019203145.1	NZ_CP0780951.2881.AOI_03	63.3;Enterolysin_A	MENQDESLIKQYVKRRAKRRLFLWLFGTSAGLITILITVFVTLFLILAAGSIDNSDSDSSSGGETFTGEYSEGLPIYKEIKGRGPFSDEIAQYAVGAAVKYKLLPSVILSQYGYESAFGTSASARNDLNYFGITWFDGCLFPKGTARGIGGIEGGWYMKFPNSKAAFSYYGFMVATQSNFNACVGNKSPGASLLILGRGGYAAAGITEDSPYYTGCMSIITSNKLTEYDEFAIKHWGEGGNNNGTITGEWTNPFPGSSLDKSSFSGGQLFGTNPGGEFRPNGFHDGLDFGSVDHPGSEIHAVHVGKVVYVGNPGISGLGACVIVINYDGLNMVYQEFANSTGNSCVKVGDQVKVGQVIGIRDTAHLHLGFTHMDWRQAQGHAFTDDGTWIDPLPFLNSS…	ATGGAAAATCAAGATGAAAGTTTAATCAAGCAGTATGTTAAGCGTCGCGCAAAGCGGCGCTTATTTTTGTGGTTGTTTGGTACTTCTGCAGGTTTGATTACCATTTTGATCACTGTATTCGTGACCCTATTTTTAATACTTGCGGCTGGTTCGATTGATAATTCGGATTCAGATTCAAGCAGTGGTGGCGAAACTTTTACAGGAGAGTATTCGGAAGGATTGCCCATTTATAAAGAAATCAAAGGAAGAGGCCCTTTTTCTGATGAGATTGCGCAATATGCCGTAGGTGCAGCAGTGAAATATAAATTATTACCAAGTGTAATCCTTTCTCAATACGGTTACGAATCAGCGTTTGGTACGTCGGCGTCCGCAAGAAATGATCTCAACTATTTTGGAATT…
GCF_019343125.1	NZ_CP0798811.2882.AOI_01	63.3;Enterolysin_A	MENQDESLIKQYVKRRAKRRLFLWLFGTSAGLITILITVFVTLFLILAAGSIDNSDSDSSSGGETFTGEYSEGLPIYKEIKGRGPFSDEIAQYAVGAAVKYKLLPSVILSQYGYESAFGTSASARNDLNYFGITWFDGCLFPKGTARGIGGIEGGWYMKFPNSKAAFSYYGFMVATQSNFNACVGNKSPGASLLILGRGGYAAAGITGDSPYYTGCMSIITSNKLTEYDEFAIKHWGEGGNNNGTITGEWTNPFPGSSLDKSSFSGGQLFGTNPGGEFRPNGFHDGLDFGSVDHPGSEIHAVHVGKVVYVGNPGISGLGACVIVINYDGLNMVYQEFANSTGNSCVKVGDQVKVGQVIGIRDTAHLHLGFTRMDWRQAQGHAFTGDGTWIDPLPFLNSS…	ATGGAAAATCAAGATGAAAGTTTAATCAAGCAGTATGTTAAGCGTCGCGCAAAGCGGCGCTTATTTTTGTGGTTGTTTGGTACTTCTGCAGGTTTGATTACCATTTTGATCACTGTATTCGTGACCCTATTTTTAATACTTGCGGCTGGTTCGATTGATAATTCGGATTCAGATTCAAGCAGTGGTGGCGAAACTTTTACAGGAGAGTATTCGGAAGGATTGCCCATTTATAAAGAAATCAAAGGAAGAGGCCCTTTTTCTGATGAGATTGCGCAATATGCCGTAGGTGCAGCAGTGAAATATAAATTATTACCAAGTGTAATCCTTTCTCAATACGGTTACGAATCAGCGTTTGGTACGTCGGCGTCCGCAAGAAATGATCTCAACTATTTTGGAATT…
GCF_019343125.1	NZ_CP0798811.2882.AOI_02	95.2;Enterocin_SE-K4	LILGIVLLSVSTLGITVDAATYYGNGVYCNTQKCWVDWSRARSEIVDRGVKAYVNGFTKVLGGVGGR	TTGATTTTAGGAATTGTTTTATTGAGTGTATCTACTTTAGGAATTACAGTAGATGCTGCAACTTATTATGGAAATGGTGTTTATTGTAATACTCAAAAATGTTGGGTAGATTGGAGTAGAGCTCGCTCTGAGATTGTTGATAGAGGAGTAAAAGCTTACGTTAATGGTTTTACGAAAGTGCTAGGTGGAGTCGGTGGAAGA
GCF_019343125.1	NZ_CP0798811.2882.AOI_02	87.2;Enterocin_L50b	MGAIAKLVTKFGWPLIKKFYKQIMQFIGQGWTIDQIEKWLKRH	ATGGGAGCAATCGCAAAACTAGTGACAAAGTTTGGGTGGCCACTAATCAAAAAATTCTACAAACAAATCATGCAATTTATTGGACAAGGATGGACAATAGATCAAATTGAAAAATGGCTAAAAAGACAT
GCF_019343125.1	NZ_CP0798811.2882.AOI_02	86.2;Enterocin_L50a	MNKKNDWRSYIMGAIAKLVAKFGWPIVKKYYKQIMQFIGEGWAINKIIEWIKKHI	ATGAACAAAAAAAATGATTGGAGGAGTTATATTATGGGAGCAATCGCAAAATTAGTAGCAAAGTTTGGGTGGCCTATTGTTAAAAAATATTACAAACAAATTATGCAGTTTATTGGAGAAGGATGGGCAATTAACAAAATCATTGAGTGGATTAAAAAACATATT
GCF_019880345.1	NZ_CP0822661.4157.AOI_01	95.2;Enterocin_SE-K4	LILGIVLLSVSTLGITVDAATYYGNGVYCNTQKCWVDWSRAHSEIVDRGVKAYVNGFTKVLGGVGGR	TTGATTTTAGGAATTGTTTTATTGAGTGTATCTACTTTAGGAATTACAGTAGATGCTGCAACTTATTATGGAAATGGTGTTTATTGTAATACTCAAAAATGTTGGGTAGATTGGAGTAGAGCTCACTCTGAGATTGTTGATAGAGGAGTAAAAGCTTACGTTAATGGTTTTACGAAAGTGCTAGGTGGAGTCGGTGGAAGA
GCF_019880345.1	NZ_CP0822661.4157.AOI_02	63.3;Enterolysin_A	MENQNESLIKQYVKRRAKRRLFLWLFGTSAGLITILITVFVTLFLILAAGSIDNSDSDSSSGGETFTGEYSEGLPIYKEIKGRGPFSDEIAQYAVGAAVKYKLLPSVILSQYGYESAFGTSASARNDLNYFGITWFDGCLFPKGTARGIGGIEGGWYMKFPNSKAAFSYYGFMVATQSNFNACVGNKSPGASLLILGRGGYAAAGITEDSPYYTGCMSIITSNKLTEYDEFAIKHWGEGGNNNGTITGEWTNPFPGSSLDKSSFSGGQLFGTNPGGEFRPNGFHDGLDFGSVDHQGSEIHAVHGGKVVYVGNPGISGLGACVIVINYDGLNMVYQEFANSTGNSRVKVGDQVKVGQVIGIRDTAHLHLGFTRMDWRQAQGHAFTDDGTWIDPLPFLNSS…	ATGGAAAACCAAAATGAAAGTTTAATCAAGCAGTATGTTAAGCGTCGTGCAAAGCGACGCTTATTTTTGTGGTTGTTTGGTACTTCTGCAGGTTTGATTACCATTTTGATCACTGTATTCGTGACCCTATTTTTAATACTTGCGGCTGGTTCGATTGATAATTCTGATTCAGATTCAAGCAGTGGTGGCGAAACTTTTACAGGAGAGTATTCGGAAGGATTGCCCATTTATAAAGAAATCAAAGGAAGAGGCCCTTTTTCTGATGAGATTGCGCAATATGCCGTAGGTGCAGCAGTGAAGTATAAATTATTACCAAGTGTGATCCTTTCGCAATACGGGTATGAATCAGCGTTTGGTACGTCGGCGTCTGCAAGAAATGATCTCAATTATTTTGGGATT…
GCF_019967715.1	NZ_CP0829641.4161.AOI_01	63.3;Enterolysin_A	MENQNESLIKQYVKRHAKRRLFLWLFGTSAGLITILITVFVTLFLILAAGSIDNSDSDSSSGGEAFTGEYSEGLPIYKEIKGRGPFSDEIAQYAVGAAVKYKLLPSVILSQYGYESAFGTSASARNDLNYFGITWFDGCLFPKGTARGIGGIEGGWYMKFPNSKAAFSYYGFMVATQSNFNACVGNKSPGASLLILGRGGYAAAGITEDSPYYTGCMSIITSNKLTEYDEFAMKHWGEGGNDNGTITGEWTNPFPGSSLDKSSFSGGQLFGTNPGGEFRPNGFHDGLDFGSVDHPGSEIHAVHGGKVVYVGNPGISGLGACVIVINYDGLNMVYQEFANSTGNSRVKVGDQVKVGQVIGIRDTAHLHLGFARTDWRQAQGHAFTDDGTWIDPLPFLNSS…	ATGGAAAACCAAAATGAAAGTTTAATCAAGCAGTATGTTAAGCGTCATGCAAAGCGACGCTTATTTTTGTGGTTGTTTGGTACTTCTGCAGGTTTGATTACTATTTTGATTACTGTGTTCGTGACCCTTTTTCTAATACTTGCGGCGGGTTCGATTGATAATTCTGATTCAGATTCAAGTAGTGGTGGCGAAGCTTTTACAGGAGAATATTCGGAAGGATTACCCATTTATAAAGAAATCAAAGGAAGAGGCCCTTTTTCTGATGAGATTGCGCAATATGCTGTAGGTGCAGCAGTGAAATATAAATTATTACCAAGTGTGATTCTTTCGCAATACGGTTATGAATCAGCGTTTGGTACGTCGGCGTCCGCAAGAAATGATCTCAACTATTTTGGGATT…
GCF_020268645.1	NZ_CP0842451.4164.AOI_01	63.3;Enterolysin_A	MENQNESLIKQYVKRRVKRRLFLWLFGTSAGLITILITVFVTLFLILAAGSIDNSDSSSGGEAFTGEYSEGLPIYKEIKGRGQFSDEIAQYAVGAAVKYKLLPSVILSQYGYESAFGTSASARNDLNYFGITWFDGCLFPKGTARGIGGIEGGWYMKFPNSKAAFSYYGFMVATQSNFNACVGNKSPGASLLILGRGGYAAAGITEDSAYYKNCMSIINKNKLTEYDEFAIKHWGEGGNNNGIITGEWTNPFPGSSLDKNSFSGGQLFGTNPGGEFRPNGFHDGLDFGSVDHPGSEIHAVHGGKVVYVGNPGISGLGACVIVINYDGLNMVYQEFANSTGNSRVKVGDQVKVGQVIGIRDTAHLHLGFTRMDWRQAQDHAFIDDGTWIDPLPFLNSSKK	ATGGAAAACCAAAATGAAAGTTTAATTAAGCAGTATGTTAAGCGTCGTGTAAAGCGGCGCTTATTTTTATGGCTGTTTGGTACTTCTGCAGGTTTGATTACTATTTTGATCACTGTGTTTGTGACCCTATTTCTAATACTTGCCGCGGGTTCTATTGATAATTCTGATTCAAGTAGTGGTGGCGAAGCTTTTACAGGAGAATATTCGGAAGGATTACCCATTTATAAAGAAATCAAAGGAAGAGGACAATTTTCAGATGAAATCGCACAATACGCTGTAGGTGCAGCCGTGAAATATAAATTATTACCAAGTGTAATTCTTTCGCAATACGGTTATGAATCAGCGTTTGGTACATCGGCATCCGCAAGAAATGATCTCAATTATTTTGGGATTACGTGG…
GCF_020268645.1	NZ_CP0842461.4165.AOI_01	95.2;Enterocin_SE-K4	LIVCNMKKKFVSIFMILGIVLLSVSTLGITVDAATYYGNGVYCNKQKCWVDWNKA	TTGATTGTATGTAATATGAAGAAAAAATTTGTTAGTATTTTTATGATTTTAGGAATTGTTTTATTGAGTGTATCTACTTTAGGAATTACAGTAGATGCTGCAACTTATTATGGAAATGGTGTATATTGTAATAAACAAAAATGTTGGGTAGATTGGAATAAAGCT
GCF_020268645.1	NZ_CP0842461.4165.AOI_02	95.2;Enterocin_SE-K4	MKKKFVSIFMILGIVLLSVSTLGITVDAATYYGNGVYCNTQKCWVDWSRARSEIVDRGVKAYVNGFTKVLGGVGGR	ATGAAGAAAAAATTTGTTAGTATTTTTATGATTTTAGGAATTGTTTTATTGAGTGTATCTACTTTAGGAATTACAGTAGATGCTGCAACTTATTATGGAAATGGTGTTTATTGTAATACTCAAAAATGTTGGGTAGATTGGAGTAGAGCTCGCTCTGAGATTGTTGATAGAGGAGTAAAAGCTTACGTTAATGGTTTTACGAAAGTGCTAGGTGGAGTCGGTGGAAGA
GCF_020268645.1	NZ_CP0842471.4163.AOI_01	91.2;Enterocin_P	MRKKLFSLTLIGKFGLVVTNFGTKVDAATRSYGNGVYCNNSKCWVNWGEAKENIAGIVISGWASGLAGIGH	ATGAGAAAAAAATTATTTAGTTTAACTCTTATTGGGAAGTTTGGATTAGTTGTGACGAATTTTGGTACAAAAGTTGATGCAGCTACGCGTTCATATGGTAATGGTGTTTATTGTAATAATAGTAAGTGCTGGGTTAACTGGGGAGAAGCTAAAGAAAATATTGCAGGAATTGTTATTAGTGGCTGGGCTTCTGGCTTGGCAGGTATAGGACAT
GCF_020268645.1	NZ_CP0842471.4163.AOI_02	63.3;Enterolysin_A	MENQNESLIKQYVKRRAKRRLFLWLFGTSAGLMTILITVFVTLFLILAAGSIDNSDSDSSSGGEAFTGEYSEGLPIYKEIKGRGPFSDEIAQYAVGAAVKYKLLPSVILSQYGYESAFGTSLSAKNDLNFFGITWFDGCLFPKGTARGIGGIEGGWYMKFPNSKAAFSYYGFMVATQSNFNASVGNKSPGVSLLILGRGGYAAAGITEDSPYYTGCMSIITSNKLTEYDELAIKHWGEGGNNNGTITGEWMNPFPGSSLDKSSFSGGQLFGTNPGGEFRPNGFHDGLDFGSVDHPGSEIHAVHGGKVVYVGNPGISGLGACVIVINYDGLNMVYQEFANSTGNSRVKVGDQVKVGQVIGIRDTAHLHLGFTRMDWRQAQGHAFTDDGTWIDPLPFLNSS…	ATGGAAAACCAAAATGAAAGTTTAATCAAGCAGTATGTTAAGCGTCGTGCAAAGCGGCGCTTATTTTTGTGGTTGTTTGGTACTTCTGCAGGTTTGATGACTATTTTGATCACTGTGTTTGTGACCCTATTTCTAATACTTGCCGCGGGATCGATTGATAATTCGGATTCAGATTCAAGCAGTGGTGGCGAAGCTTTTACAGGAGAATATTCGGAAGGATTACCCATTTATAAAGAAATCAAAGGAAGAGGCCCTTTTTCTGATGAAATTGCGCAATATGCTGTAGGTGCAGCAGTGAAATACAAATTATTGCCAAGTGTGATCCTATCGCAATACGGGTATGAATCGGCATTTGGAACGTCTCTATCTGCTAAAAACGACTTGAATTTTTTCGGAATT…
GCF_020268645.1	NZ_CP0842471.4163.AOI_03	91.2;Enterocin_P	MRKKLFSLALIGIFGLVVTNFGTKVDAATRSYGNGVYCNNSKCWVNWGEAKENIAGIVISGWASGLAGMGH	ATGAGAAAAAAATTATTTAGTTTAGCTCTTATTGGAATATTTGGGTTAGTTGTGACAAATTTTGGTACAAAAGTTGATGCAGCTACGCGTTCATATGGTAATGGTGTTTATTGTAATAATAGTAAATGCTGGGTTAACTGGGGAGAAGCTAAAGAGAATATTGCAGGAATCGTTATTAGTGGCTGGGCTTCTGGTTTGGCAGGTATGGGACAT
GCF_033954875.1	NZ_CP1236081.13705.AOI_01	95.2;Enterocin_SE-K4	LILGIVLLSVSTLGITVDAATYYGNGVYCNTQKCWVDWSRARSEIVDRGVKAYVNGFTKVLGGVGGR	TTGATTTTAGGAATTGTTTTATTGAGTGTATCTACTTTAGGAATTACAGTAGATGCTGCAACTTATTATGGAAATGGTGTTTATTGTAATACTCAAAAATGTTGGGTAGATTGGAGTAGAGCTCGCTCTGAGATTGTTGATAGAGGAGTAAAAGCTTACGTTAATGGTTTTACGAAAGTGCTAGGTGGAGTCGGTGGAAGA
GCF_033954895.1	NZ_CP1236101.13706.AOI_01	63.3;Enterolysin_A	MENQNESLIKQYVKRRAKRRLFLWLFGTSAGLMTILITVFVTLFLILAAGSIDNSDSDSSSGGEAFTGEYSEGLPIYKEIKGRGPFSDEIAQYAVGAAVKYKLLPSVILSQYGYESAFGTSASARNDLNYFGITWFDGCLFPKGTARGIGGIEGSWYMKFPNSKAAFSYYGFMVATQSNFNACVGNKSPGASLLILGRGGYAAAGITEDSPYYTGCMSIITSNKLTEYDEFAIKHWGEGNNNNGTITGEWTNPFPGSSLDKSSFSGGQLFGTNPWGEFRPNGFHDGLDFGSVDHPGSEIHAVHGGKVVYVGNPGISGLGACVIVINYDDLNMVYQEFANSTGNSRVKVGDQVKVGQVIGIRDTAHLHLGFTRMDWRQAQGHAFTDDGTWIDPLPFLNSS…	ATGGAAAACCAAAATGAAAGTTTAATCAAGCAGTATGTTAAGCGTCGTGCAAAGCGGCGCTTATTTTTGTGGTTGTTTGGTACTTCTGCAGGTTTGATGACTATTTTGATCACTGTGTTTGTGACCCTATTTCTAATACTTGCCGCGGGATCGATTGATAATTCGGATTCAGATTCAAGCAGTGGTGGCGAAGCTTTTACAGGAGAATATTCGGAAGGATTACCCATTTATAAAGAAATCAAAGGAAGAGGCCCTTTTTCTGATGAAATTGCGCAATATGCTGTAGGTGCAGCAGTGAAATATAAATTATTACCAAGTGTGATTCTTTCGCAATACGGTTATGAATCAGCGTTTGGTACGTCGGCGTCCGCAAGAAATGATCTCAACTATTTTGGGATT…
GCF_033954895.1	NZ_CP1236111.13707.AOI_01	81.2;Enterocin_A	MKHLKILSIKETQLIYGGTTHSGKYYGNGVYCTKNKCTVDWAKATTCIAGMSIGGFLGGAIPGKC	ATGAAACATTTAAAAATTTTGTCTATTAAAGAGACACAACTTATCTATGGGGGTACCACTCATAGTGGAAAATATTATGGAAATGGAGTGTATTGCACTAAAAATAAATGTACGGTCGATTGGGCCAAGGCAACTACTTGTATTGCAGGAATGTCTATAGGTGGTTTTTTAGGTGGAGCAATTCCAGGGAAGTGC
GCF_033954895.1	NZ_CP1236111.13707.AOI_01	113.2;Lactacin_F,subunit_lafX	MHIKNTKTTFILSSEELKNIQGGSAVGVLGTTFSGATAGVKLCSAGGPYAIAACGVGGALLGAGFGMWTGAVNNx	ATGCATATTAAAAACACAAAAACAACATTTATATTATCTTCAGAAGAGTTGAAAAATATTCAAGGTGGGAGTGCCGTGGGAGTTTTAGGCACTACTTTTTCTGGGGCAACAGCAGGAGTAAAACTTTGTTCAGCCGGAGGACCTTATGCAATAGCTGCTTGTGGTGTAGGTGGAGCTTTATTAGGTGCTGGATTCGGCATGTGGACCGGTGCCGTAAACAATTAA
GCF_033954895.1	NZ_CP1236111.13707.AOI_02	91.2;Enterocin_P	MKRKLFSLALIGMFGLVVTGFGTKVDAATRSYGNGVYCNDDKCWVNWNEANQQIAGIVISGWASGLAGA	ATGAAAAGAAAATTATTTAGTTTAGCTCTTATCGGAATGTTTGGGTTAGTAGTGACAGGTTTTGGTACAAAAGTTGATGCAGCTACACGTTCATATGGTAATGGTGTTTATTGTAATGATGATAAATGCTGGGTGAACTGGAATGAAGCAAATCAACAAATCGCTGGAATTGTGATTAGTGGTTGGGCTTCTGGTTTGGCAGGTGCA
GCF_033954915.1	NZ_CP1236121.13708.AOI_01	63.3;Enterolysin_A	MENQNESLIKQYVKRRAKRRLFLWLFGTSAGLMTILITVFVTLFLILAAGSIDNSDSDSSSGGEAFTGEYSEGLPIYKEIKGRGPFSDEIAQYAVGAAVKYKLLPSVILSQYGYESAFGTSASARNDLNYFGITWFDGCLFPKGTARGIGGIEGSWYMKFPNSKAAFSYYGFMVATQSNFNACVGNKSPGASLLILGRGGYAAAGITEDSPYYTGCMSIITSNKLTEYDEFAIKHWGEGNNNNGTITGEWTNPFPGSSLDKSSFSGGQLFGTNPWGEFRPNGFHDGLDFGSVDHPGSEIHAVHGGKVVYVGNPGISGLGACVIVINYDDLNMVYQEFANSTGNSRVKVGDQVKVGQVIGIRDTAHLHLGFTRMDWRQAQGHAFTDDGTWIDPLPFLNSS…	ATGGAAAACCAAAATGAAAGTTTAATCAAGCAGTATGTTAAGCGTCGTGCAAAGCGGCGCTTATTTTTGTGGTTGTTTGGTACTTCTGCAGGTTTGATGACTATTTTGATCACTGTGTTTGTGACCCTATTTCTAATACTTGCCGCGGGATCGATTGATAATTCGGATTCAGATTCAAGCAGTGGTGGCGAAGCTTTTACAGGAGAATATTCGGAAGGATTACCCATTTATAAAGAAATCAAAGGAAGAGGCCCTTTTTCTGATGAAATTGCGCAATATGCTGTAGGTGCAGCAGTGAAATATAAATTATTACCAAGTGTGATTCTTTCGCAATACGGTTATGAATCAGCGTTTGGTACGTCGGCGTCCGCAAGAAATGATCTCAACTATTTTGGGATT…
GCF_033954915.1	NZ_CP1236131.13709.AOI_01	81.2;Enterocin_A	MKHLKILSIKETQLIYGGTTHSGKYYGNGVYCTKNKCTVDWAKATTCIAGMSIGGFLGGAIPGKC	ATGAAACATTTAAAAATTTTGTCTATTAAAGAGACACAACTTATCTATGGGGGTACCACTCATAGTGGAAAATATTATGGAAATGGAGTGTATTGCACTAAAAATAAATGTACGGTCGATTGGGCCAAGGCAACTACTTGTATTGCAGGAATGTCTATAGGTGGTTTTTTAGGTGGAGCAATTCCAGGGAAGTGC
GCF_033954915.1	NZ_CP1236131.13709.AOI_01	113.2;Lactacin_F,subunit_lafX	MHIKNTKTTFILSSEELKNIQGGSAVGVLGTTFSGATAGVKLCSAGGPYAIAACGVGGALLGAGFGMWTGAVNNx	ATGCATATTAAAAACACAAAAACAACATTTATATTATCTTCAGAAGAGTTGAAAAATATTCAAGGTGGGAGTGCCGTGGGAGTTTTAGGCACTACTTTTTCTGGGGCAACAGCAGGAGTAAAACTTTGTTCAGCCGGAGGACCTTATGCAATAGCTGCTTGTGGTGTAGGTGGAGCTTTATTAGGTGCTGGATTCGGCATGTGGACCGGTGCCGTAAACAATTAA
GCF_033954915.1	NZ_CP1236131.13709.AOI_02	91.2;Enterocin_P	MKRKLFSLALIGMFGLVVTGFGTKVDAATRSYGNGVYCNDDKCWVNWNEANQQIAGIVISGWASGLAGA	ATGAAAAGAAAATTATTTAGTTTAGCTCTTATCGGAATGTTTGGGTTAGTAGTGACAGGTTTTGGTACAAAAGTTGATGCAGCTACACGTTCATATGGTAATGGTGTTTATTGTAATGATGATAAATGCTGGGTGAACTGGAATGAAGCAAATCAACAAATCGCTGGAATTGTGATTAGTGGTTGGGCTTCTGGTTTGGCAGGTGCA
GCF_036669985.1	NZ_CP1236141.13801.AOI_01	63.3;Enterolysin_A	MENQNESLIKQYVKRRAKRRLFLWLFGTSAGLMTILITVFVTLFLILAAGSIDNSDSDSSSGGEAFTGEYSEGLPIYKEIKGRGPFSDEIAQYAVGAAVKYKLLPSVILSQYGYESAFGTSASARNDLNYFGITWFDGCLFPKGTARGIGGIEGSWYMKFPNSKAAFSYYGFMVATQSNFNACVGNKSPGASLLILGRGGYAAAGITEDSPYYTGCMSIITSNKLTEYDEFAIKHWGEGNNNNGTITGEWTNPFPGSSLDKSSFSGGQLFGTNPWGEFRPNGFHDGLDFGSVDHPGSEIHAVHGGKVVYVGNPGISGLGACVIVINYDDLNMVYQEFANSTGNSRVKVGDQVKVGQVIGIRDTAHLHLGFTRMDWRQAQGHAFTDDGTWIDPLPFLNSS…	ATGGAAAACCAAAATGAAAGTTTAATCAAGCAGTATGTTAAGCGTCGTGCAAAGCGGCGCTTATTTTTGTGGTTGTTTGGTACTTCTGCAGGTTTGATGACTATTTTGATCACTGTGTTTGTGACCCTATTTCTAATACTTGCCGCGGGATCGATTGATAATTCGGATTCAGATTCAAGCAGTGGTGGCGAAGCTTTTACAGGAGAATATTCGGAAGGATTACCCATTTATAAAGAAATCAAAGGAAGAGGCCCTTTTTCTGATGAAATTGCGCAATATGCTGTAGGTGCAGCAGTGAAATATAAATTATTACCAAGTGTGATTCTTTCGCAATACGGTTATGAATCAGCGTTTGGTACGTCGGCGTCCGCAAGAAATGATCTCAACTATTTTGGGATT…
GCF_036669985.1	NZ_CP1236151.13802.AOI_01	81.2;Enterocin_A	MKHLKILSIKETQLIYGGTTHSGKYYGNGVYCTKNKCTVDWAKATTCIAGMSIGGFLGGAIPGKC	ATGAAACATTTAAAAATTTTGTCTATTAAAGAGACACAACTTATCTATGGGGGTACCACTCATAGTGGAAAATATTATGGAAATGGAGTGTATTGCACTAAAAATAAATGTACGGTCGATTGGGCCAAGGCAACTACTTGTATTGCAGGAATGTCTATAGGTGGTTTTTTAGGTGGAGCAATTCCAGGGAAGTGC
GCF_036669985.1	NZ_CP1236151.13802.AOI_01	113.2;Lactacin_F,subunit_lafX	MHIKNTKTTFILSSEELKNIQGGSAVGVLGTTFSGATAGVKLCSAGGPYAIAACGVGGALLGAGFGMWTGAVNNx	ATGCATATTAAAAACACAAAAACAACATTTATATTATCTTCAGAAGAGTTGAAAAATATTCAAGGTGGGAGTGCCGTGGGAGTTTTAGGCACTACTTTTTCTGGGGCAACAGCAGGAGTAAAACTTTGTTCAGCCGGAGGACCTTATGCAATAGCTGCTTGTGGTGTAGGTGGAGCTTTATTAGGTGCTGGATTCGGCATGTGGACCGGTGCCGTAAACAATTAA
GCF_036669985.1	NZ_CP1236151.13802.AOI_02	91.2;Enterocin_P	MKRKLFSLALIGMFGLVVTGFGTKVDAATRSYGNGVYCNDDKCWVNWNEANQQIAGIVISGWASGLAGA	ATGAAAAGAAAATTATTTAGTTTAGCTCTTATCGGAATGTTTGGGTTAGTAGTGACAGGTTTTGGTACAAAAGTTGATGCAGCTACACGTTCATATGGTAATGGTGTTTATTGTAATGATGATAAATGCTGGGTGAACTGGAATGAAGCAAATCAACAAATCGCTGGAATTGTGATTAGTGGTTGGGCTTCTGGTTTGGCAGGTGCA
GCF_030490365.1	NZ_CP1298881.13038.AOI_01	95.2;Enterocin_SE-K4	LSVSTLGITVDAATYYGNGVYCNTQKCWVDWSRARSEIVDRGVKAYVNGFTKVLGGVGGR	TTGAGTGTATCTACTTTAGGAATTACAGTAGATGCTGCAACTTATTATGGAAATGGTGTTTATTGTAATACTCAAAAATGTTGGGTAGATTGGAGTAGAGCTCGCTCTGAGATTGTTGATAGAGGAGTAAAAGCTTACGTTAATGGTTTTACGAAAGTGCTAGGTGGAGTCGGTGGAAGA
GCF_030490365.1	NZ_CP1298881.13038.AOI_02	63.3;Enterolysin_A	MENPNESLIKQYVKRRAKRRLFLWLFGTSAGLITILITVFVTLFLILAAGSIDNSDSDSSSGGETFTGEYSEGLPIYKEIKGRGPFSDEIAQYAVGAAVKYKLLPSVILSQYGYESAFGTSASARNDLNYFGITWFDGCLFPKGTARGIGGIEGGWYMKFPNSKAAFSYYGFMVATQSNFNACVGNKSPGASLLILGRGGYAAAGITEDSPYYTGCMSIITSNKLTEYDEFAIKHWGEGGNNNGTITGEWTNPFPGSSLDKSSFSGGQLFGTNPGGEFRPNGFHDGLDFGSVDHQGSEIHAVHGGKVVYVGNPGISGLGACVIVINYDGLNMVYQEFANSTGNSRVKVGDQVKVGQVIGIRDTAHLHLGFTRMDWRQAQGHAFTDDGTWIDPLPFLNSS…	ATGGAAAACCCAAATGAAAGTTTAATCAAGCAGTATGTTAAGCGTCGTGCAAAGCGACGCTTATTTTTGTGGTTGTTTGGTACTTCTGCAGGTTTGATTACCATTTTGATCACTGTATTCGTGACCCTATTTTTAATACTTGCGGCTGGTTCGATTGATAATTCTGATTCAGATTCAAGCAGTGGTGGCGAAACTTTTACAGGAGAGTATTCGGAAGGATTGCCCATTTATAAAGAAATCAAAGGAAGAGGCCCTTTTTCTGATGAGATTGCGCAATATGCCGTAGGTGCAGCAGTGAAGTATAAATTATTACCAAGTGTGATCCTTTCGCAATACGGGTATGAATCAGCGTTTGGTACGTCGGCGTCTGCAAGAAATGATCTCAATTATTTTGGGATC…
GCF_036324345.1	NZ_CP1434341.13800.AOI_01	95.2;Enterocin_SE-K4	LILGIVLLSVSTLGITVDAATYYGNGVYCNTQKCWVDWSRARSEIVDRGVKAYVNGFTKVLGGVGGR	TTGATTTTAGGAATTGTTTTATTGAGTGTATCTACTTTAGGAATTACAGTAGATGCTGCAACTTATTATGGAAATGGTGTTTATTGTAATACTCAAAAATGTTGGGTAGATTGGAGTAGAGCTCGCTCTGAGATTGTTGATAGAGGAGTAAAAGCTTACGTTAATGGTTTTACGAAAGTGCTAGGTGGAGTCGGTGGAAGA
GCF_036324345.1	NZ_CP1434341.13800.AOI_01	87.2;Enterocin_L50b	MGAIAKLVTKFGWPLIKKFYKQIMQFIGQGWTIDQIEKWLKRH	ATGGGAGCAATCGCAAAACTAGTGACAAAGTTTGGGTGGCCACTAATCAAAAAATTCTACAAACAAATCATGCAATTTATTGGACAAGGATGGACAATAGATCAAATTGAAAAATGGCTAAAAAGACAT
GCF_036324345.1	NZ_CP1434341.13800.AOI_01	86.2;Enterocin_L50a	VIYNYYEQKNDWRSYIMGAIAKLVAKFGWPIVKKYYKQIMQFIGEGWAINKIIEWIKKHI	GTGATATACAATTATTATGAACAAAAAAATGATTGGAGGAGTTATATTATGGGAGCAATCGCAAAATTAGTAGCAAAGTTTGGGTGGCCTATTGTTAAAAAGTATTACAAACAAATTATGCAGTTTATTGGAGAAGGATGGGCAATTAACAAAATCATTGAGTGGATTAAAAAACATATT
GCF_036324345.1	NZ_CP1434341.13800.AOI_02	91.2;Enterocin_P	MRKKLFSLTLIGMFGLVVTNFGTKVDAATRSYGNGVYCNNSKCWVNWGEAKENIAGIVISGWASGLAGMGH	ATGAGAAAAAAATTATTTAGTTTAACTCTTATTGGAATGTTTGGATTAGTTGTGACGAATTTTGGTACAAAAGTTGATGCAGCTACGCGTTCATATGGTAATGGTGTTTATTGTAATAATAGTAAGTGCTGGGTTAACTGGGGAGAAGCTAAAGAAAATATTGCAGGAATTGTTATTAGTGGCTGGGCTTCTGGCTTGGCAGGTATGGGACAT
GCF_036324345.1	NZ_CP1434341.13800.AOI_02	95.2;Enterocin_SE-K4	LILGIVLLSVSTLGITVDAATYYGNGVYCNTQKCWVDWSRARSEIVDRGVKAYVNGFTKVLGGVGGR	TTGATTTTAGGAATTGTTTTATTGAGTGTATCTACTTTAGGAATTACAGTAGATGCTGCAACTTATTATGGAAATGGTGTTTATTGTAATACTCAAAAATGTTGGGTAGATTGGAGTAGAGCTCGCTCTGAGATTGTTGATAGAGGAGTAAAAGCTTACGTTAATGGTTTTACGAAAGTGCTAGGTGGAGTCGGTGGAAGA
GCF_036324345.1	NZ_CP1434341.13800.AOI_03	63.3;Enterolysin_A	MENKNESLIKQYVKRRAKRRLFLWLFGTSAGLITILITVFVTLFLILAAGSIDNSDSDSSSGGETFTGEYSEGLPIYKEIKGRGPFSDEIAQYAVGAAVKYKLLPSVILSQYGYESAFGTSASARNDLNYFGITWFDGCLFPKGTARGIGGIEGGWYMKFPNSKAAFSYYGFMVATQSNFNACVGNKSPGASLLILGRGGYAAAGITEDSPYYTGCMSIITSNKLTEYDEFAIKHWGEGGNNNGTITGEWTNPFPGSSLDKSSFSGGQLFGTNPGGEFRPNGFHDGLDFGSVDHPGSEIHAVHVGKVVYVGNPGISGLGACVIVINYDGLNMVYQEFANSTGNSCVKVGDQVKVGQVIGIRDTAHLHLGFTRMDWRQAQGHAFTGDGTWIDPLPFLNSS…	ATGGAAAACAAAAATGAAAGTTTAATCAAGCAGTATGTTAAGCGTCGTGCAAAGCGACGCTTATTTTTGTGGTTGTTTGGTACTTCTGCAGGTTTGATTACTATTTTGATTACTGTATTCGTGACCCTATTTTTAATACTTGCGGCTGGTTCGATTGATAATTCGGATTCAGATTCAAGCAGTGGTGGCGAAACTTTTACAGGAGAGTATTCGGAAGGATTGCCCATTTATAAAGAAATCAAAGGAAGAGGCCCTTTTTCTGATGAGATTGCGCAATATGCCGTAGGTGCAGCAGTGAAATATAAATTATTACCAAGTGTAATCCTTTCTCAATACGGTTACGAATCAGCGTTTGGTACGTCGGCGTCCGCAAGAAATGATCTCAACTATTTTGGAATT…
GCF_036324345.1	NZ_CP1434351.13798.AOI_01	14.2;Bac32	LKKTKLLVASLRLFSSLLAFTPSVSFSQNGGVVEAAAQRGYIYKKYPKGAKVPNKVKMLVNIRGKQTMRTCYLMSWTASSRTAKYYYYI	TTGAAAAAAACAAAATTATTGGTAGCTAGTTTGCGTTTGTTTAGCAGTTTATTAGCTTTCACCCCTTCTGTTTCATTTTCTCAAAATGGTGGAGTGGTTGAAGCTGCTGCTCAAAGAGGATATATCTACAAAAAATATCCAAAAGGTGCTAAAGTGCCAAATAAAGTTAAAATGTTAGTAAATATTAGAGGTAAACAAACTATGCGTACTTGTTACCTTATGAGTTGGACTGCTAGTAGTAGAACAGCCAAATATTATTACTACATT
GCF_040745045.1	NZ_CP1604481.14179.AOI_01	76.2;EJ97enterocin	VISMKFKFNPTGTIVKKLTQYEIAWFKNKHGYYPWEIPRC	GTGATTTCCATGAAATTTAAATTTAATCCCACAGGAACCATCGTAAAAAAATTAACTCAATATGAAATAGCATGGTTCAAAAATAAACATGGATACTATCCATGGGAAATTCCTAGATGC
GCF_040745045.1	NZ_CP1604481.14179.AOI_01	76.2;EJ97enterocin	VISMKFKFNPTGTIVKKLTQYEIAWFKNKHGYYPWEIPRC	GTGATTTCCATGAAATTTAAATTTAATCCCACAGGAACCATCGTAAAAAAATTAACTCAATATGAAATAGCATGGTTCAAAAATAAACATGGATACTATCCATGGGAAATTCCTAGATGC
GCF_013867815.1	NZ_JACEIT0100000221.323.AOI_01	63.3;Enterolysin_A	METQNESLIKQYVKRRAKRRLFLWLFGTSAGLMTILITVFVTLFLILAAGSIDNSDSDSSSGGEAFTGEYSEGLPIYKEIKGRGPFSDEIAQYAVGAAVKYKLLPSVILSQYGYESAFGTSLSAKNDLNFFGITWFDGCLFPKGTARGIGGIEGGWYMKFPNSKAAFSYYGFMVATQSNFNASVGNKSPGVSLLILGRGGYAAAGITEDSPYYTGCMSIITSNKLTEYDELAIKHWGEGGNNNGTITGEWMNPFPGSSLDKSSFSGGQLFGTNPGGEFRPNGFHDGLDFGSVDHPGSEIHAVHGGKVVYVGNPGISGLGACVIVINYDGLNMVYQEFANSTGNSRVKVGDQVKVGQVIGIRDTAHLHLGFTRMDWRQAQGHAFTDDGTWIDPLPFLNSS…	ATGGAAACCCAAAATGAAAGTTTAATCAAGCAGTATGTTAAGCGTCGTGCAAAGCGGCGCTTATTTTTGTGGTTGTTTGGTACTTCTGCAGGTTTGATGACTATTTTGATCACTGTGTTTGTGACCCTATTTCTAATACTTGCCGCGGGATCGATTGATAATTCGGATTCAGATTCAAGCAGTGGTGGCGAAGCTTTTACAGGAGAATATTCGGAAGGATTACCCATTTATAAAGAAATCAAAGGAAGAGGCCCTTTTTCTGATGAAATTGCGCAATATGCTGTAGGTGCAGCAGTGAAATACAAATTATTGCCAAGTGTGATCCTATCGCAATACGGGTATGAATCGGCATTTGGAACGTCTCTATCTGCTAAAAACGACTTGAATTTTTTCGGAATT…
GCF_013867815.1	NZ_JACEIT0100000361.305.AOI_01	91.2;Enterocin_P	VTNFGTKVDAATRSYDNGIYCNNSKCWVNWGEAKENIAGIVISGWASGLAGMGH	GTGACGAATTTTGGTACAAAAGTTGATGCAGCTACGCGTTCATATGATAATGGTATTTATTGTAATAATAGTAAGTGCTGGGTTAACTGGGGAGAAGCTAAAGAAAATATTGCAGGAATTGTTATTAGTGGCTGGGCTTCTGGCTTGGCAGGTATGGGACAT
GCF_020556885.1	NZ_JACWMD0100000591.4815.AOI_01	63.3;Enterolysin_A	MENQNESLIKQYVKRRAKRRLFLWLFGTSAGLITILITVFVTLFLILAAGSIDNSDSDSSSGGEAFTGEYSEGLPIYKEIKGRGPFSDEIAQYAVGAAVKYKLLPSVILSQYGYESAFGTSASARNDLNYFGITWFDGCLFPKGTARGIGGIEGGWYMKFPNSKAAFSYYGFMVATQSNFNACVGNKSPGTSLLILGRGGYAAAGITEDSPYYTGCMSIITSNKLTEYDEFAMKHWGEGGNDNGTITGEWTNPFPGSSLDKSSFSGGQLFGTNPGGEFRPNGFHDGLDFGSVDHPGSEIHAVHGGKVVYIGNPGISGLGACVIVINYDGLNMVYQEFANSTGNSRVKVGDQVKVGQVIGIRDTAHLHLGFTRMDWRQAQGHAFTGDGTWIDPLPFLNSS…	ATGGAAAACCAAAATGAAAGTTTAATCAAGCAGTATGTTAAGCGTCGTGCAAAGCGACGCTTATTTTTGTGGTTGTTTGGTACTTCTGCAGGTTTGATTACTATTTTGATTACTGTGTTCGTGACCCTTTTTCTAATACTTGCGGCGGGTTCGATTGATAATTCTGATTCAGATTCAAGTAGTGGTGGCGAAGCTTTTACAGGAGAATATTCGGAAGGATTACCCATTTATAAAGAAATCAAAGGAAGAGGCCCTTTTTCTGATGAGATTGCGCAATATGCTGTAGGTGCAGCAGTGAAATATAAATTATTACCAAGTGTGATCCTTTCGCAATACGGTTACGAATCAGCGTTTGGTACGTCGGCGTCCGCAAGAAATGATCTCAACTATTTTGGGATT…
GCF_020556865.1	NZ_JACWME0100001381.4760.AOI_01	95.2;Enterocin_SE-K4	LILGIVLLSVSTLGITVDAATYYGNGVYCNTQKCWVDWSRARSEIVDRGVKAYVNGFTKVLGGVGGR	TTGATTTTAGGAATTGTTTTATTGAGTGTATCTACTTTAGGAATTACAGTAGATGCTGCAACTTATTATGGAAATGGTGTTTATTGTAATACTCAAAAATGTTGGGTAGATTGGAGTAGAGCTCGCTCTGAGATTGTTGATAGAGGAGTAAAAGCTTACGTTAATGGTTTTACGAAAGTGCTAGGTGGAGTCGGTGGAAGA
GCF_020556865.1	NZ_JACWME0100001381.4760.AOI_01	91.2;Enterocin_P	MRKKLFSLALIGIFGLVVTNFGTKVDAATRSYGNGVYCNNSKCWVNWGEAKENIAGIVISGWASGLAGMGH	ATGAGAAAAAAATTATTTAGTTTAGCTCTTATTGGAATATTTGGGTTAGTTGTGACAAATTTTGGTACAAAAGTTGATGCAGCTACGCGTTCATATGGTAATGGTGTTTATTGTAATAATAGTAAATGCTGGGTTAACTGGGGAGAAGCTAAAGAGAATATTGCAGGAATCGTTATTAGTGGCTGGGCTTCTGGTTTGGCAGGTATGGGACAT
GCF_021122525.1	NZ_JADMEO0100000361.4950.AOI_01	76.2;EJ97enterocin	VISMKFKFNPTGTIVKKLTQYEIAWFKNKHGYYPWEIPRC	GTGATTTCCATGAAATTTAAATTTAATCCCACAGGAACCATCGTAAAAAAATTAACTCAATATGAAATAGCATGGTTCAAAAATAAACATGGATACTATCCATGGGAAATTCCTAGATGC
GCF_015904215.1	NZ_JADZMB0100000181.510.AOI_01	63.3;Enterolysin_A	METQNESLIKQYVKRRAKRRLFLWLFGTSAGLMTILITVFVTLFLILAAGSIDNSDSDSSSGGEAFTGEYSEGLPIYKEIKGRGPFSDEIAQYAVGAAVKYKLLPSVILSQYGYESAFGTSLSAKNDLNFFGITWFDGCLFPKGTARGIGGIEGGWYMKFPNSKAAFSYYGFMVATQSNFNASVGNKSPGVSLLILGRGGYAAAGITEDSPYYTGCMSIITSNKLTEYDELAIKHWGEGGNNNGTITGEWMNPFPGSSLDKSSFSGGQLFGTNPGGEFRPNGFHDGLDFGSVDHPGSEIHAVHGGKVVYVGNPGISGLGACVIVINYDGLNMVYQEFANSTGNSRVKVGDQVKVGQVIGIRDTAHLHLGFTRMDWRQAQGHAFTDDGTWIDPLPFLNSS…	ATGGAAACCCAAAATGAAAGTTTAATCAAGCAGTATGTTAAGCGTCGTGCAAAGCGGCGCTTATTTTTGTGGTTGTTTGGTACTTCTGCAGGTTTGATGACTATTTTGATCACTGTGTTTGTGACCCTATTTCTAATACTTGCCGCGGGATCGATTGATAATTCGGATTCAGATTCAAGCAGTGGTGGCGAAGCTTTTACAGGAGAATATTCGGAAGGATTACCCATTTATAAAGAAATCAAAGGAAGAGGCCCTTTTTCTGATGAAATTGCGCAATATGCTGTAGGTGCAGCAGTGAAATACAAATTATTGCCAAGTGTGATCCTATCGCAATACGGGTATGAATCGGCATTTGGAACGTCTCTATCTGCTAAAAACGACTTGAATTTTTTCGGAATT…
GCF_016599235.1	NZ_JAENKN0100000241.550.AOI_01	95.2;Enterocin_SE-K4	LILGIVLLSVSTLGITVDAATYYGNGVYCNTQKCWVDWSRARSEIVDRGVKAYVNGFTKVLGGVGGR	TTGATTTTAGGAATTGTTTTATTGAGTGTATCTACTTTAGGAATTACAGTAGATGCTGCAACTTATTATGGAAATGGTGTTTATTGTAATACTCAAAAATGTTGGGTAGATTGGAGTAGAGCTCGCTCTGAGATTGTTGATAGAGGAGTAAAAGCTTACGTTAATGGTTTTACGAAAGTACTAGGTGGAGTCGGTGGAAGA
GCF_016599235.1	NZ_JAENKN0100000241.550.AOI_02	63.3;Enterolysin_A	MENQNESLIKQYVKRRAKRRLFLWLFGTSAGLMTILITVFVTLFLILAAGSIDNSDSDSSSGGEAFTGEYSEGLPIYKEIKGRGPFSDEIAQYAVGAAVKYKLLPSVILSQYGYESAFGTSASARNDLNYFGITWFDGCLFPKGTARGIGGIEGGWYMKFPNSKAALSYYGFMVATQSNFNACVGNKSPGASLLILGRGGYAAAGITEDSPYYTGCMSIITSNKLTEYDEFAMKHWGEGGNDNGTITGEWTNPFPGSSLDKSSFSGGQLFGTNPGGEFRPNGFHDGLDFGSVDHPGSEIHAVHGGKVVYVGNPGISGLGACVIVINYDGLNMVYQEFANSTGNSRVKVGDQVKVGQVIGIRDTAHLHLGFTRMDWRQAQGHAFTDDGTWIDPLPFLNSS…	ATGGAAAACCAAAATGAAAGTTTAATCAAGCAGTATGTTAAGCGTCGTGCAAAGCGACGCTTATTTTTGTGGTTGTTTGGTACTTCTGCAGGTTTGATGACTATTTTGATCACTGTGTTCGTGACCCTTTTTCTAATACTTGCGGCGGGTTCGATTGATAATTCGGATTCAGATTCAAGCAGTGGTGGCGAAGCTTTTACAGGAGAATATTCGGAAGGATTACCGATTTATAAAGAAATCAAAGGGAGAGGCCCATTTTCAGATGAAATTGCGCAATATGCTGTAGGTGCAGCAGTGAAATATAAATTATTACCAAGTGTGATCCTTTCGCAATACGGTTACGAATCAGCGTTTGGTACGTCGGCGTCCGCAAGAAATGATCTCAACTATTTTGGGATT…
GCF_016599235.1	NZ_JAENKN0100000281.538.AOI_01	63.3;Enterolysin_A	MMGVLFLFFGVDDSDTSGSTAGGTEFNGVYTEDLPSYPEIKGVGNVPDEIAQLAVGSAVKYHLLPSVIISQWAYESEWGHSASAKNDNNFFGITWFEGCPFPKGTARGVGGSEGGNYMKFPNKKSAFSYYGYMVASQTNFNACVGNKSPEQCLLTLGRGGYAAAGITMNSPYFTGCMSIIKSNNLTQYDDFAIKNWKDFGGNTGGSVGGGWGWPFPEVGQGSFAGGQLFGKNPGGEFRENGFHDGLDFGSVDHPGNEIHAIHGGTVTYVGNPGISGLGACVIVINDSGLNMVYQEFATSTSNAKVKVGDKVKLGDVIGIRDTEHLHLGITKKDWLQAESSAFTDDGTWLDPLKIITTGKY	ATGATGGGGGTTCTGTTTCTTTTCTTTGGCGTTGATGATTCTGATACAAGTGGATCAACTGCTGGTGGAACAGAATTTAATGGTGTATATACGGAAGATTTACCTTCTTATCCTGAAATCAAAGGAGTTGGGAATGTACCTGATGAAATCGCCCAATTAGCGGTAGGATCGGCTGTAAAGTATCACTTATTGCCGAGTGTCATTATTAGTCAATGGGCGTATGAAAGCGAATGGGGTCATTCTGCGTCTGCTAAAAACGACAATAATTTTTTCGGAATCACTTGGTTTGAAGGGTGTCCTTTTCCGAAAGGAACAGCTCGTGGTGTCGGTGGTTCAGAAGGTGGAAATTATATGAAATTTCCGAATAAAAAATCAGCCTTTAGTTATTATGGCTACATG…
GCF_016599235.1	NZ_JAENKN0100000481.527.AOI_01	93.2;Enterocin_Q	MNFLKNGIAKWMTGAELQAYKKKYGCLPWEKISCx	ATGAATTTTCTTAAAAATGGTATCGCAAAATGGATGACCGGTGCTGAATTGCAAGCGTATAAAAAGAAATATGGATGCTTGCCATGGGAAAAAATTTCTTGTTAA
GCF_016863785.1	NZ_JAFDUG0100000011.1233.AOI_01	95.2;Enterocin_SE-K4	LILGIVLLSVSTLGITVDAATYYGNGVYCNTQKCWVDWSRARSEIVDRGVKAYVNGFTKVLGGVGGR	TTGATTTTAGGAATTGTTTTATTGAGTGTATCTACTTTAGGAATTACAGTAGATGCTGCAACTTATTATGGAAATGGTGTTTATTGTAATACTCAAAAATGTTGGGTAGATTGGAGTAGAGCTCGCTCTGAGATTGTTGATAGAGGAGTAAAAGCTTACGTTAATGGTTTTACAAAAGTGCTAGGTGGAGTCGGTGGAAGA
GCF_016863785.1	NZ_JAFDUG0100000011.1233.AOI_02	63.3;Enterolysin_A	MENQNESLIKQYVKRRAKRRLFLWLFGTSAGLITILITVFVTLFLILAAGSIDNSDSDSSSGGEAFTGEYSEGLPIYKEIKGRGPFSDEIAQYAVGAAVKYKLLPSVILSQYGYESAFGTSASARNDLNYFGITWFDGCLFPKGTARGIGGIEGGWYMKFPNSKAAFSYYGFMVATQSNFNACVGNKSPGASLLILGRGGYAAAGITEDSPYYTGCMSIITSNKLTEYDEFAMKHWGEGGNDNGTITGEWTNPFPGSSLDKSSFSGGQLFGTNPGGEFRPNGFHDGLDFGSVDHPGSEIHVVHGGKVVYVGNPGISGLGACVIVINYDGLNMVYQEFANSTGNSRVKVGDQVKVGQVIGIRDTAHLHLGFTRMDWRQAQGHAFTDDGTWIDPLPFLNSS…	ATGGAAAACCAAAATGAAAGTTTAATCAAGCAGTATGTTAAGCGTCGTGCAAAGCGACGCTTATTTTTGTGGTTGTTTGGTACTTCTGCAGGTTTGATTACTATTTTGATTACTGTGTTCGTGACCCTTTTTCTAATACTTGCGGCGGGTTCGATTGATAATTCTGATTCAGATTCAAGTAGTGGTGGCGAAGCTTTTACAGGAGAATATTCGGAAGGATTACCCATTTATAAAGAAATCAAAGGAAGAGGCCCTTTTTCTGATGAGATTGCGCAATATGCCGTAGGTGCAGCAGTAAAATATAAATTATTACCAAGTGTGATTCTTTCGCAATACGGTTATGAATCAGCGTTTGGTACGTCGGCGTCCGCAAGAAATGATCTCAACTATTTTGGGATT…
GCF_018397815.1	NZ_JAFLIA0100000481.2818.AOI_01	76.2;EJ97enterocin	VISMKFKFNPTGTIVKKLTQYEIAWFKNKHGYYPWEIPRC	GTGATTTCCATGAAATTTAAATTTAATCCCACAGGAACCATCGTAAAAAAATTAACTCAATATGAAATAGCATGGTTCAAAAATAAACATGGATACTATCCATGGGAAATTCCTAGATGC
GCF_018397835.1	NZ_JAFLIB0100000161.2848.AOI_01	63.3;Enterolysin_A	MENQNESLIKQYVKRRAKRRLFLWLFGTSAGLITILITVFVTLFLILAAGSIDNSDSDSSSGGEAFTGEYSEGLPIYKEIKGRGPFSDEIAQYAVGAAVKYKLLPSVILSQYGYESAFGTSASARNDLNYFGITWFDGCLFPKGTARGIGGIEGGWYMKFPNSKAAFSYYGFMVATQSNFNACVGNKSPGASLLILGRGGYAAAGITEDSPYYTGCMSIITSNKLTEYDEFAIKHWGEGNNNNGTITGEWTNPFPGSSLDKSSFSGGQLFGTNPGGEFRPNGFHDGLDFGSVDHPGSEIHAVHGGKVVYVGNPGISGLGACVIVINYDGLNMVYQEFANSTGNSRVKVGDQVKVGQVIGIRDTAHLHLGFTRMDWRQAQGHAFTDDGTWIDPLPFLNSS…	ATGGAAAACCAAAATGAAAGTTTAATCAAGCAGTATGTTAAGCGTCGTGCAAAGCGACGCTTATTTTTGTGGTTGTTTGGTACTTCTGCAGGTTTGATTACTATTTTGATTACTGTGTTCGTGACCCTTTTTCTAATACTTGCGGCGGGTTCGATTGATAATTCTGATTCAGATTCAAGTAGTGGTGGCGAAGCTTTTACAGGAGAATATTCGGAAGGATTACCCATTTATAAAGAAATCAAAGGAAGAGGCCCTTTTTCTGATGAGATTGCGCAATATGCTGTAGGTGCAGCAGTGAAATATAAATTATTACCAAGTGTGATTCTTTCGCAATACGGTTATGAATCAGCGTTTGGTACGTCGGCGTCCGCAAGAAATGATCTCAACTATTTTGGGATT…
GCF_018397835.1	NZ_JAFLIB0100000261.2859.AOI_01	87.2;Enterocin_L50b	MGAIAKLVTKFGWPLIKKFYKQIMQFIGQGWTIDQIEKWLKRH	ATGGGAGCAATCGCAAAACTAGTGACAAAGTTTGGGTGGCCACTAATCAAAAAATTCTACAAACAAATCATGCAATTTATTGGACAAGGATGGACAATAGATCAAATTGAAAAATGGCTAAAAAGACAT
GCF_018397835.1	NZ_JAFLIB0100000261.2859.AOI_01	86.2;Enterocin_L50a	MNKKNDWRSYIMGAIAKLVAKFGWPIVKKYYKQIMQFIGEGWAINKIIEWIKKHI	ATGAACAAAAAAAATGATTGGAGGAGTTATATTATGGGAGCAATCGCAAAATTAGTAGCAAAGTTTGGGTGGCCTATTGTTAAAAAATATTACAAACAAATTATGCAGTTTATTGGAGAAGGATGGGCAATTAACAAAATCATTGAGTGGATTAAAAAACATATT
GCF_018397765.1	NZ_JAFLIC0100000131.2755.AOI_01	81.2;Enterocin_A	MKHLKILSIKETQLIYGGTTHSGKYYGNGVYCTKNKCTVDWAKATTCIAGMSIGGFLGGAIPGKC	ATGAAACATTTAAAAATTTTGTCTATTAAAGAGACACAACTTATCTATGGGGGTACCACTCATAGTGGAAAATATTATGGAAATGGAGTGTATTGCACTAAAAATAAATGTACGGTCGATTGGGCCAAGGCAACTACTTGTATTGCAGGAATGTCTATAGGTGGTTTTTTAGGTGGAGCAATTCCAGGGAAGTGC
GCF_018397765.1	NZ_JAFLIC0100000151.2756.AOI_01	91.2;Enterocin_P	MKRKLFSLALIGMFGLVVTGFGTKVDAATRSYGNGVYCNDDKCWVNWNEANQQIAGIVISGWASGLAGA	ATGAAAAGAAAATTATTTAGTTTAGCTCTTATCGGAATGTTTGGGTTAGTAGTGACAGGTTTTGGTACAAAAGTTGATGCAGCTACACGTTCATATGGTAATGGTGTTTATTGTAATGATGATAAATGCTGGGTGAACTGGAATGAAGCAAATCAACAAATCGCTGGAATTGTGATTAGTGGTTGGGCTTCTGGTTTGGCAGGTGCA
GCF_018397765.1	NZ_JAFLIC0100000181.2753.AOI_01	63.3;Enterolysin_A	MENQNESLIKQYVKRRAKRRLFLWLFGTSAGLMTILITVFVTLFLILAAGSIDNSDSDSSSGGEAFTGEYSEGLPIYKEIKGRGPFSDEIAQYAVGAAVKYKLLPSVILSQYGYESAFGTSASARNDLNYFGITWFDGCLFPKGTARGIGGIEGSWYMKFPNSKAAFSYYGFMVATQSNFNACVGNKSPGASLLILGRGGYAAAGITEDSPYYTGCMSIITSNKLTEYDEFAIKHWGEGNNNNGTITGEWTNPFPGSSLDKSSFSGGQLFGTNPWGEFRPNGFHDGLDFGSVDHPGSEIHAVHGGKVVYVGNPGISGLGACVIVINYDDLNMVYQEFANSTGNSRVKVGDQVKVGQVIGIRDTAHLHLGFTRMDWRQAQGHAFTDDGTWIDPLPFLNSS…	ATGGAAAACCAAAATGAAAGTTTAATCAAGCAGTATGTTAAGCGTCGTGCAAAGCGGCGCTTATTTTTGTGGTTGTTTGGTACTTCTGCAGGTTTGATGACTATTTTGATCACTGTGTTTGTGACCCTATTTCTAATACTTGCCGCGGGATCGATTGATAATTCGGATTCAGATTCAAGCAGTGGTGGCGAAGCTTTTACAGGAGAATATTCGGAAGGATTACCCATTTATAAAGAAATCAAAGGAAGAGGCCCTTTTTCTGATGAAATTGCGCAATATGCTGTAGGTGCAGCAGTGAAATATAAATTATTACCAAGTGTGATTCTTTCGCAATACGGTTATGAATCAGCGTTTGGTACGTCGGCGTCCGCAAGAAATGATCTCAACTATTTTGGGATT…
GCF_018397795.1	NZ_JAFLID0100000061.2797.AOI_01	91.2;Enterocin_P	MKRKLFSLALIGMFGLVVTGFGTKVDAATRSYGNGVYCNDDKCWVNWNEANQQIAGIVISGWASGLAGA	ATGAAAAGAAAATTATTTAGTTTAGCTCTTATCGGAATGTTTGGGTTAGTAGTGACAGGTTTTGGTACAAAAGTTGATGCAGCTACACGTTCATATGGTAATGGTGTTTATTGTAATGATGATAAATGCTGGGTGAACTGGAATGAAGCAAATCAACAAATCGCTGGAATTGTGATTAGTGGTTGGGCTTCTGGTTTGGCAGGTGCA
GCF_018397795.1	NZ_JAFLID0100000091.2781.AOI_01	81.2;Enterocin_A	MKHLKILSIKETQLIYGGTTHSGKYYGNGVYCTKNKCTVDWAKATTCIAGMSIGGFLGGAIPGKC	ATGAAACATTTAAAAATTTTGTCTATTAAAGAGACACAACTTATCTATGGGGGTACCACTCATAGTGGAAAATATTATGGAAATGGAGTGTATTGCACTAAAAATAAATGTACGGTCGATTGGGCCAAGGCAACTACTTGTATTGCAGGAATGTCTATAGGTGGTTTTTTAGGTGGAGCAATTCCAGGGAAGTGC
GCF_018397795.1	NZ_JAFLID0100000161.2785.AOI_01	63.3;Enterolysin_A	MENQNESLIKQYVKRRAKRRLFLWLFGTSAGLMTILITVFVTLFLILAAGSIDNSDSDSSSGGEAFTGEYSEGLPIYKEIKGRGPFSDEIAQYAVGAAVKYKLLPSVILSQYGYESAFGTSASARNDLNYFGITWFDGCLFPKGTARGIGGIEGSWYMKFPNSKAAFSYYGFMVATQSNFNACVGNKSPGASLLILGRGGYAAAGITEDSPYYTGCMSIITSNKLTEYDEFAIKHWGEGNNNNGTITGEWTNPFPGSSLDKSSFSGGQLFGTNPWGEFRPNGFHDGLDFGSVDHPGSEIHAVHGGKVVYVGNPGISGLGACVIVINYDDLNMVYQEFANSTGNSRVKVGDQVKVGQVIGIRDTAHLHLGFTRMDWRQAQGHAFTDDGTWIDPLPFLNSS…	ATGGAAAACCAAAATGAAAGTTTAATCAAGCAGTATGTTAAGCGTCGTGCAAAGCGGCGCTTATTTTTGTGGTTGTTTGGTACTTCTGCAGGTTTGATGACTATTTTGATCACTGTGTTTGTGACCCTATTTCTAATACTTGCCGCGGGATCGATTGATAATTCGGATTCAGATTCAAGCAGTGGTGGCGAAGCTTTTACAGGAGAATATTCGGAAGGATTACCCATTTATAAAGAAATCAAAGGAAGAGGCCCTTTTTCTGATGAAATTGCGCAATATGCTGTAGGTGCAGCAGTGAAATATAAATTATTACCAAGTGTGATTCTTTCGCAATACGGTTATGAATCAGCGTTTGGTACGTCGGCGTCCGCAAGAAATGATCTCAACTATTTTGGGATT…
GCF_018397725.1	NZ_JAFLIE0100000061.2676.AOI_01	81.2;Enterocin_A	MKHLKILSIKETQLIYGGTTHSGKYYGNGVYCTKNKCTVDWAKATTCIAGMSIGGFLGGAIPGKC	ATGAAACATTTAAAAATTTTGTCTATTAAAGAGACACAACTTATCTATGGGGGTACCACTCATAGTGGAAAATATTATGGAAATGGAGTGTATTGCACTAAAAATAAATGTACGGTCGATTGGGCCAAGGCAACTACTTGTATTGCAGGAATGTCTATAGGTGGTTTTTTAGGTGGAGCAATTCCAGGGAAGTGC
GCF_018397725.1	NZ_JAFLIE0100000151.2674.AOI_01	91.2;Enterocin_P	MKRKLFSLALIGMFGLVVTGFGTKVDAATRSYGNGVYCNDDKCWVNWNEANQQIAGIVISGWASGLAGA	ATGAAAAGAAAATTATTTAGTTTAGCTCTTATCGGAATGTTTGGGTTAGTAGTGACAGGTTTTGGTACAAAAGTTGATGCAGCTACACGTTCATATGGTAATGGTGTTTATTGTAATGATGATAAATGCTGGGTGAACTGGAATGAAGCAAATCAACAAATCGCTGGAATTGTGATTAGTGGTTGGGCTTCTGGTTTGGCAGGTGCA
GCF_018397715.1	NZ_JAFLIF0100000091.2664.AOI_01	81.2;Enterocin_A	MKHLKILSIKETQLIYGGTTHSGKYYGNGVYCTKNKCTVDWAKATTCIAGMSIGGFLGGAIPGKC	ATGAAACATTTAAAAATTTTGTCTATTAAAGAGACACAACTTATCTATGGGGGTACCACTCATAGTGGAAAATATTATGGAAATGGAGTGTATTGCACTAAAAATAAATGTACGGTCGATTGGGCCAAGGCAACTACTTGTATTGCAGGAATGTCTATAGGTGGTTTTTTAGGTGGAGCAATTCCAGGGAAGTGC
GCF_018397715.1	NZ_JAFLIF0100000151.2639.AOI_01	91.2;Enterocin_P	MKRKLFSLALIGMFGLVVTGFGTKVDAATRSYGNGVYCNDDKCWVNWNEANQQIAGIVISGWASGLAGA	ATGAAAAGAAAATTATTTAGTTTAGCTCTTATCGGAATGTTTGGGTTAGTAGTGACAGGTTTTGGTACAAAAGTTGATGCAGCTACACGTTCATATGGTAATGGTGTTTATTGTAATGATGATAAATGCTGGGTGAACTGGAATGAAGCAAATCAACAAATCGCTGGAATTGTGATTAGTGGTTGGGCTTCTGGTTTGGCAGGTGCA
GCF_018397715.1	NZ_JAFLIF0100000181.2667.AOI_01	63.3;Enterolysin_A	MENQNESLIKQYVKRRAKRRLFLWLFGTSAGLMTILITVFVTLFLILAAGSIDNSDSDSSSGGEAFTGEYSEGLPIYKEIKGRGPFSDEIAQYAVGAAVKYKLLPSVILSQYGYESAFGTSASARNDLNYFGITWFDGCLFPKGTARGIGGIEGSWYMKFPNSKAAFSYYGFMVATQSNFNACVGNKSPGASLLILGRGGYAAAGITEDSPYYTGCMSIITSNKLTEYDEFAIKHWGEGNNNNGTITGEWTNPFPGSSLDKSSFSGGQLFGTNPWGEFRPNGFHDGLDFGSVDHPGSEIHAVHGGKVVYVGNPGISGLGACVIVINYDDLNMVYQEFANSTGNSRVKVGDQVKVGQVIGIRDTAHLHLGFTRMDWRQAQGHAFTDDGTWIDPLPFLNSS…	ATGGAAAACCAAAATGAAAGTTTAATCAAGCAGTATGTTAAGCGTCGTGCAAAGCGGCGCTTATTTTTGTGGTTGTTTGGTACTTCTGCAGGTTTGATGACTATTTTGATCACTGTGTTTGTGACCCTATTTCTAATACTTGCCGCGGGATCGATTGATAATTCGGATTCAGATTCAAGCAGTGGTGGCGAAGCTTTTACAGGAGAATATTCGGAAGGATTACCCATTTATAAAGAAATCAAAGGAAGAGGCCCTTTTTCTGATGAAATTGCGCAATATGCTGTAGGTGCAGCAGTGAAATATAAATTATTACCAAGTGTGATTCTTTCGCAATACGGTTATGAATCAGCGTTTGGTACGTCGGCGTCCGCAAGAAATGATCTCAACTATTTTGGGATT…
GCF_018397745.1	NZ_JAFLIG0100000481.2700.AOI_01	76.2;EJ97enterocin	VISMKFKFNPTGTIVKKLTQYEIAWFKNKHGYYPWEIPRC	GTGATTTCCATGAAATTTAAATTTAATCCCACAGGAACCATCGTAAAAAAATTAACTCAATATGAAATAGCATGGTTCAAAAATAAACATGGATACTATCCATGGGAAATTCCTAGATGC
GCF_018397675.1	NZ_JAFLIH0100000531.2560.AOI_01	76.2;EJ97enterocin	VISMKFKFNPTGTIVKKLTQYEIAWFKNKHGYYPWEIPRC	GTGATTTCCATGAAATTTAAATTTAATCCCACAGGAACCATCGTAAAAAAATTAACTCAATATGAAATAGCATGGTTCAAAAATAAACATGGATACTATCCATGGGAAATTCCTAGATGC
GCF_018397695.1	NZ_JAFLII0100000481.2618.AOI_01	76.2;EJ97enterocin	VISMKFKFNPTGTIVKKLTQYEIAWFKNKHGYYPWEIPRC	GTGATTTCCATGAAATTTAAATTTAATCCCACAGGAACCATCGTAAAAAAATTAACTCAATATGAAATAGCATGGTTCAAAAATAAACATGGATACTATCCATGGGAAATTCCTAGATGC
GCF_018397625.1	NZ_JAFLIJ0100000221.2482.AOI_01	63.3;Enterolysin_A	MENQDESLIKQYVKRRAKRRLFLWLFGTSAGLITILITVFVTLFLILAAGSIDNSDSDSSSGGETFTGEYSEGLPIYKEIKGRGPFSDEIAQYAVGAAVKYKLLPSVILSQYGYESAFGTSASARNDLNYFGITWFDGCLFPKGTARGIGGIEGGWYMKFPNSKAAFSYYGFMVATQSNFNACVGNKSPGASLLILGRGGYAAAGITGDSPYYTGCMSIITSNKLTEYDEFAIKHWGEGGNNNGTITGEWTNPFPGSSLDKSSFSGGQLFGTNPGGEFRPNGFHDGLDFGSVDHPGSEIHAVHVGKVVYVGNPGISGLGACVIVINYDGLNMVYQEFANSTGNSCVKVGDQVKVGQVIGIRDTAHLHLGFTRMDWRQAQGHAFTGDGTWIDPLPFLNSS…	ATGGAAAATCAAGATGAAAGTTTAATCAAGCAGTATGTTAAGCGTCGCGCAAAGCGGCGCTTATTTTTGTGGTTGTTTGGTACTTCTGCAGGTTTGATTACCATTTTGATCACTGTATTCGTGACCCTATTTTTAATACTTGCGGCTGGTTCGATTGATAATTCGGATTCAGATTCAAGCAGTGGTGGCGAAACTTTTACAGGAGAGTATTCGGAAGGATTGCCCATTTATAAAGAAATCAAAGGAAGAGGCCCTTTTTCTGATGAGATTGCGCAATATGCCGTAGGTGCAGCAGTGAAATATAAATTATTACCAAGTGTAATCCTTTCTCAATACGGTTACGAATCAGCGTTTGGTACGTCGGCGTCCGCAAGAAATGATCTCAACTATTTTGGAATT…
GCF_018397655.1	NZ_JAFLIK0100000511.2527.AOI_01	76.2;EJ97enterocin	VISMKFKFNPTGTIVKKLTQYEIAWFKNKHGYYPWEIPRC	GTGATTTCCATGAAATTTAAATTTAATCCCACAGGAACCATCGTAAAAAAATTAACTCAATATGAAATAGCATGGTTCAAAAATAAACATGGATACTATCCATGGGAAATTCCTAGATGC
GCF_018397615.1	NZ_JAFLIL0100000301.2435.AOI_01	63.3;Enterolysin_A	METQNESLIKQYVKRRAKRRLFLWLFGTSAGLMTILITVFVTLFLILAAGSIDNSDSDSSSGGEAFTGEYSEGLPIYKEIKGRGPFSDEIAQYAVGAAVKYKLLPSVILSQYGYESAFGTSLSAKNDLNFFGITWFDGCLFPKGTARGIGGIEGGWYMKFPNSKAAFSYYGFMVATQSNFNASVGNKSPGVSLLILGRGGYAAAGITEDSPYYTGCMSIITSNKLTEYDEFAMKHWGEGGNDNGTITGEWTNPFPGSSLDKSSFSGGQLFGTNPGGEFRPNGFHDGLDFGSVDHPGSEIHAVHGGKVVYVGNPGISGLGACVIVINYDGLNMVYQEFANSTGNSRVKVGDQVKVGQVIGIRDTAHLHLGFTRMDWRQAQGHAFTDDGTWIDPLPFLNSS…	ATGGAAACCCAAAATGAAAGTTTAATCAAGCAGTATGTTAAGCGTCGTGCAAAGCGGCGCTTATTTTTGTGGTTGTTTGGTACTTCTGCAGGTTTGATGACTATTTTGATCACTGTGTTTGTGACCCTATTTCTAATACTTGCCGCGGGATCGATTGATAATTCGGATTCAGATTCAAGCAGTGGTGGCGAAGCTTTTACAGGAGAATATTCGGAAGGATTACCCATTTATAAAGAAATCAAAGGAAGAGGCCCTTTTTCTGATGAAATTGCGCAATATGCTGTAGGTGCAGCAGTGAAATACAAATTATTGCCAAGTGTGATCCTATCGCAATACGGGTATGAATCGGCATTTGGAACGTCTCTATCTGCTAAAAACGACTTGAATTTTTTCGGAATT…
GCF_018397615.1	NZ_JAFLIL0100000441.2418.AOI_01	91.2;Enterocin_P	VTNFGTKVDAVTRSYDNGIYCNNSKCWVNWGEAKENIAGIVISGWASGLAGMGH	GTGACGAATTTTGGTACAAAAGTTGATGCAGTTACGCGTTCATATGATAATGGTATTTATTGTAATAATAGTAAGTGCTGGGTTAACTGGGGAGAAGCTAAAGAAAATATTGCAGGAATTGTTATTAGTGGCTGGGCTTCTGGCTTGGCAGGTATGGGACAT
GCF_018397615.1	NZ_JAFLIL0100000521.2431.AOI_01	14.2;Bac32	LKKTKLLVASLCLFSSLLAFTPSVSFSQNGGVVEAAAQRGYIYKKYPKGAKVPNKVKMLVNIRGKQTMRTCYLMSWTASSRTAKYYYYI	TTGAAAAAAACAAAATTATTGGTAGCTAGTTTGTGTTTGTTTAGCAGTTTATTAGCTTTCACCCCTTCTGTTTCATTTTCTCAAAATGGTGGAGTGGTTGAAGCTGCTGCTCAAAGAGGATATATCTACAAAAAATATCCAAAAGGTGCTAAAGTGCCAAATAAAGTTAAAATGTTAGTAAATATTAGAGGTAAACAAACTATGCGTACTTGTTACCTTATGAGTTGGACTGCTAGTAGTAGAACAGCCAAATATTATTACTACATT
GCF_018397575.1	NZ_JAFLIM0100000101.2281.AOI_01	91.2;Enterocin_P	MKRKLFSLALIGMFGLVVTGFGTKVDAATRSYGNGVYCNDDKCWVNWNEANQQIAGIVISGWASGLAGA	ATGAAAAGAAAATTATTTAGTTTAGCTCTTATCGGAATGTTTGGGTTAGTAGTGACAGGTTTTGGTACAAAAGTTGATGCAGCTACACGTTCATATGGTAATGGTGTTTATTGTAATGATGATAAATGCTGGGTGAACTGGAATGAAGCAAATCAACAAATCGCTGGAATTGTGATTAGTGGTTGGGCTTCTGGTTTGGCAGGTGCA
GCF_018397575.1	NZ_JAFLIM0100000121.2298.AOI_01	81.2;Enterocin_A	MKHLKILSIKETQLIYGGTTHSGKYYGNGVYCTKNKCTVDWAKATTCIAGMSIGGFLGGAIPGKC	ATGAAACATTTAAAAATTTTGTCTATTAAAGAGACACAACTTATCTATGGGGGTACCACTCATAGTGGAAAATATTATGGAAATGGAGTGTATTGCACTAAAAATAAATGTACGGTCGATTGGGCCAAGGCAACTACTTGTATTGCAGGAATGTCTATAGGTGGTTTTTTAGGTGGAGCAATTCCAGGGAAGTGC
GCF_018397575.1	NZ_JAFLIM0100000161.2275.AOI_01	63.3;Enterolysin_A	MENQNESLIKQYVKRRAKRRLFLWLFGTSAGLMTILITVFVTLFLILAAGSIDNSDSDSSSGGEAFTGEYSEGLPIYKEIKGRGPFSDEIAQYAVGAAVKYKLLPSVILSQYGYESAFGTSASARNDLNYFGITWFDGCLFPKGTARGIGGIEGSWYMKFPNSKAAFSYYGFMVATQSNFNACVGNKSPGASLLILGRGGYAAAGITEDSPYYTGCMSIITSNKLTEYDEFAIKHWGEGNNNNGTITGEWTNPFPGSSLDKSSFSGGQLFGTNPWGEFRPNGFHDGLDFGSVDHPGSEIHAVHGGKVVYVGNPGISGLGACVIVINYDDLNMVYQEFANSTGNSRVKVGDQVKVGQVIGIRDTAHLHLGFTRMDWRQAQGHAFTDDGTWIDPLPFLNSS…	ATGGAAAACCAAAATGAAAGTTTAATCAAGCAGTATGTTAAGCGTCGTGCAAAGCGGCGCTTATTTTTGTGGTTGTTTGGTACTTCTGCAGGTTTGATGACTATTTTGATCACTGTGTTTGTGACCCTATTTCTAATACTTGCCGCGGGATCGATTGATAATTCGGATTCAGATTCAAGCAGTGGTGGCGAAGCTTTTACAGGAGAATATTCGGAAGGATTACCCATTTATAAAGAAATCAAAGGAAGAGGCCCTTTTTCTGATGAAATTGCGCAATATGCTGTAGGTGCAGCAGTGAAATATAAATTATTACCAAGTGTGATTCTTTCGCAATACGGTTATGAATCAGCGTTTGGTACGTCGGCGTCCGCAAGAAATGATCTCAACTATTTTGGGATT…
GCF_018397595.1	NZ_JAFLIN0100000491.2339.AOI_01	63.3;Enterolysin_A	MENQNESLIKQYVKRRAKRRLFLWLFGTSAGLITILITVFVTLFLILAAGSIDNSDSDSSSGGETFTGEYSEGLPIYKEIKGRGPFSDEIAQYAVGAAVKYKLLPSVILSQYGYESAFGTSASARNDLNYFGITWFDGCLFPKGTARGIGGIEGGWYMKFPNSKAAFSYYGFMVATQSNFNACVGNKSPGASLLILGRGGYAAAGITEDSPYYTGCMSIITSNKLTEYDEFAIKHWGEGGNNNGTITGEWTNPFPGSSLDKSSFSGGQLFGTNPGGEFRPNGFHDGLDFGSVDHQGSEIHAVHGGKVVYVGNPGISGLGACVIVINYDGLNMVYQEFANSTGNSRVKVGDQVKVGQVIGIRDTAHLHLGFTRMDWRQAQGHAFTDDGTWIDPLPFLNSS…	ATGGAAAACCAAAATGAAAGTTTAATCAAGCAGTATGTTAAGCGTCGTGCAAAGCGACGCTTATTTTTGTGGTTGTTTGGTACTTCTGCAGGTTTGATTACCATTTTGATCACTGTATTCGTGACCCTATTTTTAATACTTGCGGCTGGTTCGATTGATAATTCTGATTCAGATTCAAGCAGTGGTGGCGAAACTTTTACAGGAGAGTATTCGGAAGGATTGCCCATTTATAAAGAAATCAAAGGAAGAGGCCCTTTTTCTGATGAGATTGCGCAATATGCCGTAGGTGCAGCAGTGAAGTATAAATTATTACCAAGTGTGATCCTTTCGCAATACGGGTATGAATCAGCGTTTGGTACGTCGGCGTCTGCAAGAAATGATCTCAATTATTTTGGGATT…
GCF_018397595.1	NZ_JAFLIN0100000491.2339.AOI_02	95.2;Enterocin_SE-K4	LILGIVLLSVSTLGITVDAATYYGNGVYCNTQKCWVDWSRARSEIVDRGVKAYVNGFTKVLGGVGGR	TTGATTTTAGGAATTGTTTTATTGAGTGTATCTACTTTAGGAATTACAGTAGATGCTGCAACTTATTATGGAAATGGTGTTTATTGTAATACTCAAAAATGTTGGGTAGATTGGAGTAGAGCTCGCTCTGAGATTGTTGATAGAGGAGTAAAAGCTTACGTTAATGGTTTTACGAAAGTGCTAGGTGGAGTCGGTGGAAGA
GCF_018397595.1	NZ_JAFLIN0100000601.2357.AOI_01	93.2;Enterocin_Q	MNFLKNGIAKWMTGAELQAYKKKYGCLPWEKISCx	ATGAATTTTCTTAAAAATGGTATCGCAAAATGGATGACCGGTGCTGAATTGCAAGCGTATAAAAAGAAATATGGATGCTTGCCATGGGAAAAAATTTCTTGTTAA
GCF_018397545.1	NZ_JAFLIO0100000421.2244.AOI_01	95.2;Enterocin_SE-K4	LILGIVLLSVSTLGITVDAATYYGNGVYCNTQKCWVDWSRARSEIVDRGVKAYVNGFTKVLGGVGGR	TTGATTTTAGGAATTGTTTTATTGAGTGTATCTACTTTAGGAATTACAGTAGATGCTGCAACTTATTATGGAAATGGTGTTTATTGTAATACTCAAAAATGTTGGGTAGATTGGAGTAGAGCTCGCTCTGAGATTGTTGATAGAGGAGTAAAAGCTTACGTTAATGGTTTTACGAAAGTGCTAGGTGGAGTCGGTGGAAGA
GCF_018397545.1	NZ_JAFLIO0100000421.2244.AOI_02	63.3;Enterolysin_A	MENQNESLIKQYVKRRAKRRLFLWLFGTSAGLITILITVFVTLFLILAAGSIDNSDSDSSSGGETFTGEYSEGLPIYKEIKGRGPFSDEIAQYAVGAAVKYKLLPSVILSQYGYESAFGTSASARNDLNYFGITWFDGCLFPKGTARGIGGIEGGWYMKFPNSKAAFSYYGFMVATQSNFNACVGNKSPGASLLILGRGGYAAAGITEDSPYYTGCMSIITSNKLTEYDEFAIKHWGEGGNNNGTITGEWTNPFPGSSLDKSSFSGGQLFGTNPGGEFRPNGFHDGLDFGSVDHQGSEIHAVHGGKVVYVGNPGISGLGACVIVINYDGLNMVYQEFANSTGNSRVKVGDQVKVGQVIGIRDTAHLHLGFTRMDWRQAQGHAFTDDGTWIDPLPFLNSS…	ATGGAAAACCAAAATGAAAGTTTAATCAAGCAGTATGTTAAGCGTCGTGCAAAGCGACGCTTATTTTTGTGGTTGTTTGGTACTTCTGCAGGTTTGATTACCATTTTGATCACTGTATTCGTGACCCTATTTTTAATACTTGCGGCTGGTTCGATTGATAATTCTGATTCAGATTCAAGCAGTGGTGGCGAAACTTTTACAGGAGAGTATTCGGAAGGATTGCCCATTTATAAAGAAATCAAAGGAAGAGGCCCTTTTTCTGATGAGATTGCGCAATATGCCGTAGGTGCAGCAGTGAAGTATAAATTATTACCAAGTGTGATCCTTTCGCAATACGGGTATGAATCAGCGTTTGGTACGTCGGCGTCTGCAAGAAATGATCTCAATTATTTTGGGATT…
GCF_018397545.1	NZ_JAFLIO0100000881.2200.AOI_01	93.2;Enterocin_Q	MNFLKNGIAKWMTGAELQAYKKKYGCLPWEKISCx	ATGAATTTTCTTAAAAATGGTATCGCAAAATGGATGACCGGTGCTGAATTGCAAGCGTATAAAAAGAAATATGGATGCTTGCCATGGGAAAAAATTTCTTGTTAA
GCF_018397535.1	NZ_JAFLIP0100000531.2168.AOI_01	76.2;EJ97enterocin	VISMKFKFNPTGTIVKKLTQYEIAWFKNKHGYYPWEIPRC	GTGATTTCCATGAAATTTAAATTTAATCCCACAGGAACCATCGTAAAAAAATTAACTCAATATGAAATAGCATGGTTCAAAAATAAACATGGATACTATCCATGGGAAATTCCTAGATGC
GCF_018397485.1	NZ_JAFLIQ0100000511.2085.AOI_01	76.2;EJ97enterocin	VISMKFKFNPTGTIVKKLTQYEIAWFKNKHGYYPWEIPRC	GTGATTTCCATGAAATTTAAATTTAATCCCACAGGAACCATCGTAAAAAAATTAACTCAATATGAAATAGCATGGTTCAAAAATAAACATGGATACTATCCATGGGAAATTCCTAGATGC
GCF_018397455.1	NZ_JAFLIR0100000461.1998.AOI_01	76.2;EJ97enterocin	VISMKFKFNPTGTIVKKLTQYEIAWFKNKHGYYPWEIPRC	GTGATTTCCATGAAATTTAAATTTAATCCCACAGGAACCATCGTAAAAAAATTAACTCAATATGAAATAGCATGGTTCAAAAATAAACATGGATACTATCCATGGGAAATTCCTAGATGC
GCF_018397515.1	NZ_JAFLIS0100000511.2095.AOI_01	76.2;EJ97enterocin	VISMKFKFNPTGTIVKKLTQYEIAWFKNKHGYYPWEIPRC	GTGATTTCCATGAAATTTAAATTTAATCCCACAGGAACCATCGTAAAAAAATTAACTCAATATGAAATAGCATGGTTCAAAAATAAACATGGATACTATCCATGGGAAATTCCTAGATGC
GCF_018397435.1	NZ_JAFLIU0100000341.1981.AOI_01	91.2;Enterocin_P	MRKKLFSLALIGIFGLVVTNFGTKVDAATRSYGNGVYCNNSKCWVNWGEAKENIAGIVISGWASGLAGMGH	ATGAGAAAAAAATTATTTAGTTTAGCTCTTATTGGAATATTTGGGTTAGTTGTGACAAATTTTGGTACAAAAGTTGATGCAGCTACGCGTTCATATGGTAATGGTGTTTATTGTAATAATAGTAAATGCTGGGTTAACTGGGGAGAAGCTAAAGAGAATATTGCAGGAATCGTTATTAGTGGCTGGGCTTCTGGTTTGGCAGGTATGGGACAT
GCF_018397435.1	NZ_JAFLIU0100000341.1981.AOI_01	95.2;Enterocin_SE-K4	LILGIVLLSVSTLGITVDAATYYGNGVYCNTQKCWVDWSRARSEIVDRGVKAYVNGFTKVLGGVGGR	TTGATTTTAGGAATTGTTTTATTGAGTGTATCTACTTTAGGAATTACAGTAGATGCTGCAACTTATTATGGAAATGGTGTTTATTGTAATACTCAAAAATGTTGGGTAGATTGGAGTAGAGCTCGCTCTGAGATTGTTGATAGAGGAGTAAAAGCTTACGTTAATGGTTTTACGAAAGTGCTAGGTGGAGTCGGTGGAAGA
GCF_018397435.1	NZ_JAFLIU0100000411.1956.AOI_01	86.2;Enterocin_L50a	VIYNYYEQKNDWRSYIMGAIAKLVAKFGWPIVKKYYKQIMQFIGEGWAINKIIEWIKKHI	GTGATATACAATTATTATGAACAAAAAAATGATTGGAGGAGTTATATTATGGGAGCAATCGCAAAATTAGTAGCAAAGTTTGGGTGGCCTATTGTTAAAAAGTATTACAAACAAATTATGCAGTTTATTGGAGAAGGATGGGCAATTAACAAAATCATTGAGTGGATTAAAAAACATATT
GCF_018397435.1	NZ_JAFLIU0100000411.1956.AOI_01	87.2;Enterocin_L50b	MGAIAKLVTKFGWPLIKKFYKQIMQFIGQGWTIDQIEKWLKRH	ATGGGAGCAATCGCAAAACTAGTGACAAAGTTTGGGTGGCCACTAATCAAAAAATTCTACAAACAAATCATGCAATTTATTGGACAAGGATGGACAATAGATCAAATTGAAAAATGGCTAAAAAGACAT
GCF_018397385.1	NZ_JAFLIV0100000291.1889.AOI_01	63.3;Enterolysin_A	MENQNESLIKQYVKRRAKRRLFLWLFGTSAGLITILITVFVTLFLILAAGSIDNSDSDSSSGGETFTGEYSEGLPIYKEIKGRGPFSDEIAQYAVGAAVKYKLLPSVILSQYGYESAFGTSASARNDLNYFGITWFDGCLFPKGTARGIGGIEGGWYMKFPNSKAAFSYYGFMVATQSNFNACVGNKSPGASLLILGRGGYAAAGITEDSPYYTGCMSIITSNKLTEYDEFAIKHWGEGGNNNGTITGEWTNPFPGSSLDKSSFSGGQLFGTNPGGEFRPNGFHDGLDFGSVDHQGSEIHAVHGGKVVYVGNPGISGLGACVIVINYDGLNMVYQEFANSTGNSRVKVGDQVKVGQVIGIRDTAHLHLGFTRMDWRQAQGHAFTDDGTWIDPLPFLNSS…	ATGGAAAACCAAAATGAAAGTTTAATCAAGCAGTATGTTAAGCGTCGTGCAAAGCGACGCTTATTTTTGTGGTTGTTTGGTACTTCTGCAGGTTTGATTACCATTTTGATCACTGTATTCGTGACCCTATTTTTAATACTTGCGGCTGGTTCGATTGATAATTCTGATTCAGATTCAAGCAGTGGTGGCGAAACTTTTACAGGAGAGTATTCGGAAGGATTGCCCATTTATAAAGAAATCAAAGGAAGAGGCCCTTTTTCTGATGAGATTGCGCAATATGCCGTAGGTGCAGCAGTGAAGTATAAATTATTACCAAGTGTGATCCTTTCGCAATACGGGTATGAATCAGCGTTTGGTACGTCGGCGTCTGCAAGAAATGATCTCAATTATTTTGGGATT…
GCF_018397385.1	NZ_JAFLIV0100000361.1885.AOI_01	87.2;Enterocin_L50b	MGAIAKLVTKFGWPLIKKFYKQIMQFIGQGWTIDQIEKWLKRH	ATGGGAGCAATCGCAAAACTAGTGACAAAGTTTGGGTGGCCACTAATCAAAAAATTCTACAAACAAATCATGCAATTTATTGGACAAGGATGGACAATAGATCAAATTGAAAAATGGCTAAAAAGACAT
GCF_018397385.1	NZ_JAFLIV0100000361.1885.AOI_01	86.2;Enterocin_L50a	MNKKNDWRSYIMGAIAKLVAKFGWPIVKKYYKQIMQFIGEGWAINKIIEWIKKHI	ATGAACAAAAAAAATGATTGGAGGAGTTATATTATGGGAGCAATCGCAAAATTAGTAGCAAAGTTTGGGTGGCCTATTGTTAAAAAGTATTACAAACAAATTATGCAGTTTATTGGAGAAGGATGGGCAATTAACAAAATCATTGAGTGGATTAAAAAACATATT
GCF_018397355.1	NZ_JAFLIW0100000451.1728.AOI_01	95.2;Enterocin_SE-K4	LILGIVLLSVSTLGITVDAATYYGNGVYCNTQKCWVDWSRARSEIVDRGVKAYVNGFTKVLGGVGGR	TTGATTTTAGGAATTGTTTTATTGAGTGTATCTACTTTAGGAATTACAGTAGATGCTGCAACTTATTATGGAAATGGTGTTTATTGTAATACTCAAAAATGTTGGGTAGATTGGAGTAGAGCTCGCTCTGAGATTGTTGATAGAGGAGTAAAAGCTTACGTTAATGGTTTTACGAAAGTGCTAGGTGGAGTCGGTGGAAGA
GCF_018397355.1	NZ_JAFLIW0100000451.1728.AOI_02	63.3;Enterolysin_A	MENQDESLIKQYVKRRAKRRLFLWLFGTSAGLITILITVFVTLFLILAAGSIDNSDSDSSSGGETFTGEYSEGLPIYKEIKGRGPFSDEIAQYAVGAAVKYKLLPSVILSQYGYESAFGTSASARNDLNYFGITWFDGCLFPKGTARGIGGIEGGWYMKFPNSKAAFSYYGFMVATQSNFNACVGNKSPGASLLILGRGGYAAAGITGDSPYYTGCMSIITSNKLTEYDEFAIKHWGEGGNNNGTITGEWTNPFPGSSLDKSSFSGGQLFGTNPGGEFRPNGFHDGLDFGSVDHPGSEIHAVHVGKVVYVGNPGISGLGACVIVINYDGLNMVYQEFANSTGNSCVKVGDQVKVGQVIGIRDTAHLHLGFTRMDWRQAQGHAFTGDGTWIDPLPFLNSS…	ATGGAAAATCAAGATGAAAGTTTAATCAAGCAGTATGTTAAGCGTCGCGCAAAGCGGCGCTTATTTTTGTGGTTGTTTGGTACTTCTGCAGGTTTGATTACCATTTTGATCACTGTATTCGTGACCCTATTTTTAATACTTGCGGCTGGTTCGATTGATAATTCGGATTCAGATTCAAGCAGTGGTGGCGAAACTTTTACAGGAGAGTATTCGGAAGGATTGCCCATTTATAAAGAAATCAAAGGAAGAGGCCCTTTTTCTGATGAGATTGCGCAATATGCCGTAGGTGCAGCAGTGAAATATAAATTATTACCAAGTGTAATCCTTTCTCAATACGGTTACGAATCAGCGTTTGGTACGTCGGCGTCCGCAAGAAATGATCTCAACTATTTTGGAATT…
GCF_018397375.1	NZ_JAFLIX0100000541.1813.AOI_01	76.2;EJ97enterocin	VISMKFKFNPTGTIVKKLTQYEIAWFKNKHGYYPWEIPRC	GTGATTTCCATGAAATTTAAATTTAATCCCACAGGAACCATCGTAAAAAAATTAACTCAATATGAAATAGCATGGTTCAAAAATAAACATGGATACTATCCATGGGAAATTCCTAGATGC
GCF_018397395.1	NZ_JAFLIY0100000331.1932.AOI_01	86.2;Enterocin_L50a	VIYNYYEQKNDWRSYIMGAIAKLVAKFGWPIVKKYYKQIMQFIGEGWAINKIIEWIKKHI	GTGATATACAATTATTATGAACAAAAAAATGATTGGAGGAGTTATATTATGGGAGCAATCGCAAAATTAGTAGCAAAGTTTGGGTGGCCTATTGTTAAAAAGTATTACAAACAAATTATGCAGTTTATTGGAGAAGGATGGGCAATTAACAAAATCATTGAGTGGATTAAAAAACATATT
GCF_018397395.1	NZ_JAFLIY0100000331.1932.AOI_01	87.2;Enterocin_L50b	MGAIAKLVTKFGWPLIKKFYKQIMQFIGQGWTIDQIEKWLKRH	ATGGGAGCAATCGCAAAACTAGTGACAAAGTTTGGGTGGCCACTAATCAAAAAATTCTACAAACAAATCATGCAATTTATTGGACAAGGATGGACAATAGATCAAATTGAAAAATGGCTAAAAAGACAT
GCF_018397395.1	NZ_JAFLIY0100000381.1928.AOI_01	91.2;Enterocin_P	MRKKLFSLALIGIFGLVVTNFGTKVDAATRSYGNGVYCNNSKCWVNWGEAKENIAGIVISGWASGLAGMGH	ATGAGAAAAAAATTATTTAGTTTAGCTCTTATTGGAATATTTGGGTTAGTTGTGACAAATTTTGGTACAAAAGTTGATGCAGCTACGCGTTCATATGGTAATGGTGTTTATTGTAATAATAGTAAATGCTGGGTTAACTGGGGAGAAGCTAAAGAGAATATTGCAGGAATCGTTATTAGTGGCTGGGCTTCTGGTTTGGCAGGTATGGGACAT
GCF_018397395.1	NZ_JAFLIY0100000381.1928.AOI_01	95.2;Enterocin_SE-K4	LILGIVLLSVSTLGITVDAATYYGNGVYCNTQKCWVDWSRARSEIVDRGVKAYVNGFTKVLGGVGGR	TTGATTTTAGGAATTGTTTTATTGAGTGTATCTACTTTAGGAATTACAGTAGATGCTGCAACTTATTATGGAAATGGTGTTTATTGTAATACTCAAAAATGTTGGGTAGATTGGAGTAGAGCTCGCTCTGAGATTGTTGATAGAGGAGTAAAAGCTTACGTTAATGGTTTTACGAAAGTGCTAGGTGGAGTCGGTGGAAGA
GCF_018397315.1	NZ_JAFLIZ0100000471.1652.AOI_01	76.2;EJ97enterocin	VISMKFKFNPTGTIVKKLTQYEIAWFKNKHGYYPWEIPRC	GTGATTTCCATGAAATTTAAATTTAATCCCACAGGAACCATCGTAAAAAAATTAACTCAATATGAAATAGCATGGTTCAAAAATAAACATGGATACTATCCATGGGAAATTCCTAGATGC
GCF_018397325.1	NZ_JAFLJA0100000191.1686.AOI_01	63.3;Enterolysin_A	MENQNESLIKQYVKRRAKRRLFLWLFGTSAGLITILITVFVTLFLILAAGSIDNSDSDSSSGGETFTGEYSEGLPIYKEIKGRGPFSDEIAQYAVGAAVKYKLLPSVILSQYGYESAFGTSASARNDLNYFGITWFDGCLFPKGTARGIGGIEGGWYMKFPNSKAAFSYYGFMVATQSNFNACVGNKSPGASLLILGRGGYAAAGITEDSPYYTGCMSIITSNKLTEYDEFAIKHWGEGGNNNGTITGEWTNPFPGSSLDKSSFSGGQLFGTNPGGEFRPNGFHDGLDFGSVDHPGSEIHAVHVGKVVYVGNPGISGLGACVIVINYDGLNMVYQEFANSTGNSCVKVGDQVKVGQVIGIRDTAHLHLGFTRMDWRQAQGHAFTGDGTWIDPLPFLNSS…	ATGGAAAACCAAAATGAAAGTTTAATCAAGCAGTATGTTAAGCGTCGTGCAAAGCGACGCTTATTTTTGTGGTTGTTTGGTACTTCTGCAGGTTTGATTACCATTTTGATCACTGTATTCGTGACCCTATTTTTAATACTTGCGGCTGGTTCGATTGATAATTCGGATTCAGATTCAAGCAGTGGTGGCGAAACTTTTACAGGAGAGTATTCGGAAGGATTGCCCATTTATAAAGAAATCAAAGGAAGAGGCCCTTTTTCTGATGAGATTGCGCAATATGCCGTAGGTGCAGCAGTGAAATATAAATTATTACCAAGTGTAATCCTTTCTCAATACGGTTACGAATCAGCGTTTGGTACGTCGGCGTCCGCAAGAAATGATCTCAACTATTTTGGAATT…
GCF_018397325.1	NZ_JAFLJA0100000401.1721.AOI_01	91.2;Enterocin_P	MRKKLFSLTLIGKFGLVVTNFGTKVDAATRSYGNGVYCNNSKCWVNWGEAKENIAGIVISGWASGLAGMGH	ATGAGAAAAAAATTATTTAGTTTAACTCTTATTGGAAAGTTTGGATTAGTTGTGACGAATTTTGGTACAAAAGTTGATGCAGCTACGCGTTCATATGGTAATGGTGTTTATTGTAATAATAGTAAGTGCTGGGTTAACTGGGGAGAAGCTAAAGAAAATATTGCAGGAATTGTTATTAGTGGCTGGGCTTCTGGCTTGGCAGGTATGGGACAT
GCF_018397275.1	NZ_JAFLJB0100000131.1506.AOI_01	22.2;Bacteriocin_T8	LFSINRYINDYEFKATFYDVNHCYIIKCYIIKLLMIFNITSNLKKFEKEKMIMKKKVLKHCVILGILGTCLAGIGTGIDVDAATYYRNGLYCNKEKCWVNWGQSWSEGLKRWGDNLFGSFSGGR	TTGTTTTCTATTAATCGTTATATAAACGATTATGAATTCAAAGCTACTTTTTATGACGTCAATCATTGTTATATAATAAAATGTTATATAATAAAATTACTAATGATATTTAATATTACAAGCAATCTTAAGAAATTCGAAAAGGAAAAAATGATTATGAAAAAGAAAGTATTGAAACATTGTGTTATTCTAGGAATATTAGGAACTTGTCTAGCTGGCATTGGTACAGGAATAGACGTTGACGCAGCTACTTACTATAGAAATGGTCTTTATTGTAACAAAGAAAAATGTTGGGTAAATTGGGGACAATCATGGTCAGAAGGGTTAAAACGTTGGGGAGATAATCTTTTTGGTAGTTTTAGTGGAGGACGA
GCF_018397275.1	NZ_JAFLJB0100000271.1550.AOI_01	95.2;Enterocin_SE-K4	MKKKFVSIFMILGIVLLSVSTLGITVDAATYYGNGVYCNTQKCWVDWSRARSEIVDRGVKAYVNGFTKVLGGVGGR	ATGAAGAAAAAATTTGTTAGTATTTTTATGATTTTAGGAATTGTTTTATTGAGTGTATCTACTTTAGGAATTACAGTAGATGCTGCAACTTATTATGGAAATGGTGTTTATTGTAATACTCAAAAATGTTGGGTAGATTGGAGTAGAGCTCGCTCTGAGATTGTTGATAGAGGAGTAAAAGCTTACGTTAATGGTTTTACGAAAGTGCTAGGTGGAGTCGGTGGAAGA
GCF_018397275.1	NZ_JAFLJB0100000271.1550.AOI_02	63.3;Enterolysin_A	MENQNESLIKQYVKRRAKRRLFLWLFGTSAGLITILITVFVTLFLILAAGSIDNSDSDSSSGGEAFTGEYSEGLPIYKEIKGRGPFSDEIAQYAVGAAVKYKLLPSVILSQYGYESAFGTSASARNDLNYFGITWFDGCLFPKGTARGIGGIEGGWYMKFPNSKAAFSYYGFMVATQSNFNACVGNKSPGASLLILGRGGYAAAGITEDSPYYTGCMSIITSNKLTEYDEFAMKHWGEGGNDNGTITGEWTNPFPGSSLDKSSFSGGQLFGTNPGGEFRPNGFHDGLDFGSVDHPGSEIHAVHGGKVVYVGNPGISGLGACVIVINYDGLNMVYQEFANSTGNSRVKVGDQVKVGQVIGIRDTAHLHLGFTRMDWRQAQGHAFTDDGTWIDPLPFLNSS…	ATGGAAAACCAAAATGAAAGTTTAATCAAGCAGTATGTTAAGCGTCGTGCAAAGCGACGCTTATTTTTGTGGTTGTTTGGTACTTCTGCAGGTTTGATTACTATTTTGATTACTGTGTTCGTGACCCTTTTTCTAATACTTGCGGCGGGTTCGATTGATAATTCTGATTCAGATTCAAGTAGTGGTGGCGAAGCTTTTACAGGAGAATATTCGGAAGGATTACCCATTTATAAAGAAATCAAAGGAAGAGGCCCTTTTTCTGATGAGATTGCGCAATATGCCGTAGGTGCAGCAGTAAAATATAAATTATTACCAAGTGTGATTCTTTCGCAATACGGTTATGAATCAGCGTTTGGTACGTCGGCGTCCGCTAGAAATGATCTCAACTATTTTGGGATT…
GCF_018397275.1	NZ_JAFLJB0100000751.1524.AOI_01	91.2;Enterocin_P	MRKKLFSLTLIGKFGLVVTNFGTKVDAATRSYGNGVYCNNSKCWVNWGEAKENIAGIVISGWASGLAGMGH	ATGAGAAAAAAATTATTTAGTTTAACTCTTATTGGAAAGTTTGGATTAGTTGTGACGAATTTTGGTACAAAAGTTGATGCAGCTACGCGTTCATATGGTAATGGTGTTTATTGTAATAATAGTAAGTGCTGGGTTAACTGGGGAGAAGCTAAAGAAAATATTGCAGGAATTGTTATTAGTGGCTGGGCTTCTGGCTTGGCAGGTATGGGACAT
GCF_018397285.1	NZ_JAFLJC0100000351.1588.AOI_01	95.2;Enterocin_SE-K4	LILGIVLLSVSTLGITVDAATYYGNGVYCNTQKCWVDWSRARSEIVDRGVKAYVNGFTKVLGGVGGR	TTGATTTTAGGAATTGTTTTATTGAGTGTATCTACTTTAGGAATTACAGTAGATGCTGCAACTTATTATGGAAATGGTGTTTATTGTAATACTCAAAAATGTTGGGTAGATTGGAGTAGAGCTCGCTCTGAGATTGTTGATAGAGGAGTAAAAGCTTACGTTAATGGTTTTACGAAAGTGCTAGGTGGAGTCGGTGGAAGA
GCF_018397285.1	NZ_JAFLJC0100000351.1588.AOI_01	91.2;Enterocin_P	MRKKLFSLALIGIFGLVVTNFGTKVDAATRSYGNGVYCNNSKCWVNWGEAKENIAGIVISGWASGLAGMGH	ATGAGAAAAAAATTATTTAGTTTAGCTCTTATTGGAATATTTGGGTTAGTTGTGACAAATTTTGGTACAAAAGTTGATGCAGCTACGCGTTCATATGGTAATGGTGTTTATTGTAATAATAGTAAATGCTGGGTTAACTGGGGAGAAGCTAAAGAGAATATTGCAGGAATCGTTATTAGTGGCTGGGCTTCTGGTTTGGCAGGTATGGGACAT
GCF_018397285.1	NZ_JAFLJC0100000371.1591.AOI_01	87.2;Enterocin_L50b	MGAIAKLVTKFGWPLIKKFYKQIMQFIGQGWTIDQIEKWLKRH	ATGGGAGCAATCGCAAAACTAGTGACAAAGTTTGGGTGGCCACTAATCAAAAAATTCTACAAACAAATCATGCAATTTATTGGACAAGGATGGACAATAGATCAAATTGAAAAATGGCTAAAAAGACAT
GCF_018397285.1	NZ_JAFLJC0100000371.1591.AOI_01	86.2;Enterocin_L50a	VIYNYYEQKNDWRSYIMGAIAKLVAKFGWPIVKKYYKQIMQFIGEGWAINKIIEWIKKHI	GTGATATACAATTATTATGAACAAAAAAATGATTGGAGGAGTTATATTATGGGAGCAATCGCAAAATTAGTAGCAAAGTTTGGGTGGCCTATTGTTAAAAAGTATTACAAACAAATTATGCAGTTTATTGGAGAAGGATGGGCAATTAACAAAATCATTGAGTGGATTAAAAAACATATT
GCF_018397225.1	NZ_JAFLJD0100000531.1438.AOI_01	76.2;EJ97enterocin	VISMKFKFNPTGTIVKKLTQYEIAWFKNKHGYYPWEIPRC	GTGATTTCCATGAAATTTAAATTTAATCCCACAGGAACCATCGTAAAAAAATTAACTCAATATGAAATAGCATGGTTCAAAAATAAACATGGATACTATCCATGGGAAATTCCTAGATGC
GCF_018397255.1	NZ_JAFLJE0100000371.1490.AOI_01	87.2;Enterocin_L50b	MGAIAKLVTKFGWPLIKKFYKQIMQFIGQGWTIDQIEKWLKRH	ATGGGAGCAATCGCAAAACTAGTGACAAAGTTTGGGTGGCCACTAATCAAAAAATTCTACAAACAAATCATGCAATTTATTGGACAAGGATGGACAATAGATCAAATTGAAAAATGGCTAAAAAGACAT
GCF_018397255.1	NZ_JAFLJE0100000371.1490.AOI_01	86.2;Enterocin_L50a	VIYNYYEQKNDWRSYIMGAIAKLVAKFGWPIVKKYYKQIMQFIGEGWAINKIIEWIKKHI	GTGATATACAATTATTATGAACAAAAAAATGATTGGAGGAGTTATATTATGGGAGCAATCGCAAAATTAGTAGCAAAGTTTGGGTGGCCTATTGTTAAAAAGTATTACAAACAAATTATGCAGTTTATTGGAGAAGGATGGGCAATTAACAAAATCATTGAGTGGATTAAAAAACATATT
GCF_018397255.1	NZ_JAFLJE0100000381.1481.AOI_01	95.2;Enterocin_SE-K4	LILGIVLLSVSTLGITVDAATYYGNGVYCNTQKCWVDWSRARSEIVDRGVKAYVNGFTKVLGGVGGR	TTGATTTTAGGAATTGTTTTATTGAGTGTATCTACTTTAGGAATTACAGTAGATGCTGCAACTTATTATGGAAATGGTGTTTATTGTAATACTCAAAAATGTTGGGTAGATTGGAGTAGAGCTCGCTCTGAGATTGTTGATAGAGGAGTAAAAGCTTACGTTAATGGTTTTACGAAAGTGCTAGGTGGAGTCGGTGGAAGA
GCF_018397255.1	NZ_JAFLJE0100000381.1481.AOI_01	91.2;Enterocin_P	MRKKLFSLALIGIFGLVVTNFGTKVDAATRSYGNGVYCNNSKCWVNWGEAKENIAGIVISGWASGLAGMGH	ATGAGAAAAAAATTATTTAGTTTAGCTCTTATTGGAATATTTGGGTTAGTTGTGACAAATTTTGGTACAAAAGTTGATGCAGCTACGCGTTCATATGGTAATGGTGTTTATTGTAATAATAGTAAATGCTGGGTTAACTGGGGAGAAGCTAAAGAGAATATTGCAGGAATCGTTATTAGTGGCTGGGCTTCTGGTTTGGCAGGTATGGGACAT
GCF_017942505.1	NZ_JAGMTW0100000201.1304.AOI_01	95.2;Enterocin_SE-K4	LILGIVLLSVSTLGITVDAETYYGNGVYCNTQKCWVDWSRARSEIVDRGVKAYVNGFTKVLGGVGGR	TTGATTTTAGGAATTGTTTTATTGAGTGTATCTACTTTAGGAATTACAGTAGATGCTGAAACTTATTATGGAAATGGTGTTTATTGTAATACTCAAAAATGTTGGGTAGATTGGAGTAGAGCTCGCTCTGAGATTGTTGATAGAGGAGTAAAAGCTTACGTTAATGGTTTTACGAAAGTGCTAGGTGGAGTCGGTGGAAGA
GCF_017942505.1	NZ_JAGMTW0100000201.1304.AOI_02	63.3;Enterolysin_A	MENQNESLIKQYVKRRAKRRLFLWLSGTSAGLITILITVFVTLFLILAAGSIDNSDSDSSSGGETFTGEYSEGLPIYKEIKGRGPFSDEIAQYAVGAAVKYKLLPSVILSQYGYESAFGTSASARNDLNYFGITWFDGCLFPKGTARGIGGIEGGWYMKFPNSKAAFSYYGFMVATQSNFNACVGNKSPGASLLILGRGGYAAAGITEDSPYYTGCMSIITSNKLTEYDEFAIKHWGEGGNNNGTITGEWTNPFPGSSLDKSSFSGGQLFGTNPGGEFRPNGFHDGLDFGSVDHQGSEIHAVHGGKVVYVGNPGISGLGACVIVINYDGLNMVYQEFANSTGNSRVKVGDQVKVGQVIGIRDTAHLHLGFTRMDWRQAQGHAFTGDGTWIDPLPFLNSS…	ATGGAAAACCAAAATGAAAGTTTAATCAAGCAGTATGTTAAGCGTCGTGCAAAGCGACGCTTATTTTTGTGGTTGTCTGGTACTTCTGCAGGTTTGATTACCATTTTGATCACTGTATTCGTGACCCTATTTTTAATACTTGCGGCTGGTTCGATTGATAATTCTGATTCAGATTCAAGCAGTGGTGGCGAAACTTTTACAGGAGAGTATTCGGAAGGATTGCCCATTTATAAAGAAATCAAAGGAAGAGGCCCTTTTTCTGATGAGATTGCGCAATATGCCGTAGGTGCAGCAGTGAAGTATAAATTATTACCAAGTGTGATCCTTTCGCAATACGGGTATGAATCAGCGTTTGGTACGTCGGCGTCTGCAAGAAATGATCTCAATTATTTTGGGATT…
GCF_018069745.1	NZ_JAGPYO0100000031.1347.AOI_01	113.2;Lactacin_F,subunit_lafX	MHIKNTKTTFILSSEELKNIQGGSAVGVLGTTFSGATAGVKLCSAGGPYAIAACGVGGALLGAGFGMWTGAVNN	ATGCATATTAAAAACACAAAAACAACATTTATATTATCTTCAGAAGAGTTGAAAAATATTCAAGGTGGGAGTGCCGTGGGAGTTTTAGGCACTACTTTTTCTGGGGCAACAGCAGGAGTAAAACTTTGTTCAGCCGGAGGACCTTATGCAATAGCTGCTTGTGGTGTAGGTGGAGCTTTATTAGGTGCTGGATTCGGCATGTGGACCGGTGCCGTAAACAAT
GCF_018069745.1	NZ_JAGPYO0100000031.1347.AOI_01	81.2;Enterocin_A	MKHLKILSIKETQLIYGGTTHSGKYYGNGVYCTKNKCTVDWAKATTCIAGMSIGGFLGGAIPGKC	ATGAAACATTTAAAAATTTTGTCTATTAAAGAGACACAACTTATCTATGGGGGTACCACTCATAGTGGAAAATATTATGGAAATGGAGTGTATTGCACTAAAAATAAATGTACGGTCGATTGGGCCAAGGCAACTACTTGTATTGCAGGAATGTCTATAGGTGGTTTTTTAGGTGGAGCAATTCCAGGGAAGTGC
GCF_018069745.1	NZ_JAGPYO0100000041.1344.AOI_01	91.2;Enterocin_P	MKRKLFSLALIGMFGLVVTGFGTKVDAATRSYGNGVYCNDDKCWVNWNEANQQIAGIVISGWASGLAGA	ATGAAAAGAAAATTATTTAGTTTAGCTCTTATCGGAATGTTTGGGTTAGTAGTGACAGGTTTTGGTACAAAAGTTGATGCAGCTACACGTTCATATGGTAATGGTGTTTATTGTAATGATGATAAATGCTGGGTGAACTGGAATGAAGCAAATCAACAAATCGCTGGAATTGTGATTAGTGGTTGGGCTTCTGGTTTGGCAGGTGCA
GCF_018069745.1	NZ_JAGPYO0100000201.1334.AOI_01	63.3;Enterolysin_A	MENQNESLIKQYVKRRAKRRLFLWLFGTSAGLMTILITVFVTLFLILAAGSIDNSDSDSSSGGEAFTGEYSEGLPIYKEIKGRGPFSDEIAQYAVGAAVKYKLLPSVILSQYGYESAFGTSLSAKNDLNFFGITWFDGCLFPKGTARGIGGIEGGWYMKFPNSKAAFSYYGFMVATQSNFNASVGNKSPGVSLLILGRGGYAAAGITENSPYYTGCMSIITSNKLTEYDELAIKHWGEGGNNNGTITGEWMNPFPGSSLDKSSFSGGQLFGTNPGGEFRPNGFHDGLDFGSVDHPGSEIHAVHGGKVVYVGNPGISGLGACVIVINYDGLNMVYQEFANSTGNSRVKVGDQVKVGQVIGIRDTAHLHLGFTRMDWRQAQGHAFTDDGTWIDPLPFLNSS…	ATGGAAAACCAAAATGAAAGTTTAATCAAGCAGTATGTTAAGCGTCGTGCAAAGCGGCGCTTATTTTTGTGGTTGTTTGGTACTTCTGCAGGTTTGATGACTATTTTGATCACTGTGTTTGTGACCCTATTTCTAATACTTGCCGCGGGATCGATTGATAATTCGGATTCAGATTCAAGCAGTGGTGGCGAAGCTTTTACAGGAGAATATTCGGAAGGATTACCCATTTATAAAGAAATCAAAGGAAGAGGCCCTTTTTCTGATGAAATTGCGCAATATGCTGTAGGTGCAGCAGTGAAATACAAATTATTGCCAAGTGTGATCCTATCGCAATACGGGTATGAATCGGCATTTGGAACGTCTCTATCTGCTAAAAACGACTTGAATTTTTTCGGAATT…
GCF_018069825.1	NZ_JAGPYP0100000371.1367.AOI_01	76.2;EJ97enterocin	VISMKFKFNPTGTIVKKLTQYEIAWFKNKHGYYPWEIPRC	GTGATTTCCATGAAATTTAAATTTAATCCCACAGGAACCATCGTAAAAAAATTAACTCAATATGAAATAGCATGGTTCAAAAATAAACATGGATACTATCCATGGGAAATTCCTAGATGC
GCF_019662465.1	NZ_JAIFNP0100000041.4121.AOI_01	76.2;EJ97enterocin	MISMKFKFNPTGTIVKKLTQYEIAWFKNKHGYYPWEIPRC	ATGATTTCCATGAAATTTAAATTTAATCCCACAGGAACCATCGTAAAAAAATTAACTCAATATGAAATAGCATGGTTCAAAAATAAACATGGATACTATCCATGGGAAATTCCTAGATGC
GCF_019662395.1	NZ_JAIFNQ0100000311.3957.AOI_01	76.2;EJ97enterocin	VISMKFKFNPTGTIVKKLTQYEIAWFKNKHGYYPWEIPRC	GTGATTTCCATGAAATTTAAATTTAATCCAACAGGAACCATCGTAAAAAAATTAACTCAATACGAAATAGCATGGTTCAAAAATAAACATGGATATTATCCATGGGAGATTCCTAGATGC
GCF_019662395.1	NZ_JAIFNQ0100000481.3914.AOI_01	91.2;Enterocin_P	VTNFGTKVDAVTRSYDNGIYCNNSKCWVNWGEAKENIAGIVISGWASGLAGMGH	GTGACGAATTTTGGTACAAAAGTTGATGCAGTTACGCGTTCATATGATAATGGTATTTATTGTAATAATAGTAAGTGCTGGGTTAACTGGGGAGAAGCTAAAGAAAATATTGCAGGAATTGTTATTAGTGGCTGGGCTTCTGGCTTGGCAGGTATGGGACAT
GCF_019662395.1	NZ_JAIFNQ0100000661.3946.AOI_01	63.3;Enterolysin_A	MENQDESLIKQYVKRRAKRRLFLWLFGTSAGLITILITVFVTLFLILAAGSIDNSDSDSSSGGEAFTGEYSEGLPIYKEIKGRGPFSDEIAQYAVGAAVKYKLLPSVILSQYGYESAFGTSASARNDLNYFGITWFDGCLFPKGTARGIGGIEGGWYMKFPNSKAAFSYYGFMVATQSNFNACVGNKSPGASLLILGRGGYAAAGITEDSPYYTGCMSIITSNKLTEYDEFAMKHWGEGGNDNGTITGEWTNSFPGSSLDKSSFSGGQLFGTNPGGEFRPNGFHDGLDFGSVDHPGSEIHAVHGGKVVYVGNPGISGLGACVIVINYDGLNMVYQEFANSTGNSRVKVGDQVKVGQVIGIRDTAHLHLGFTRMDWRQAQGHAFTDDGTWIDPLPFLNSS…	ATGGAAAATCAAGATGAAAGTTTAATCAAGCAGTATGTTAAGCGTCGCGCAAAGCGGCGCTTATTTTTGTGGTTGTTTGGTACTTCTGCAGGTTTGATTACTATTTTGATCACTGTGTTTGTGACCCTATTTCTAATACTTGCGGCGGGTTCGATTGATAATTCGGATTCAGATTCAAGCAGTGGTGGCGAAGCTTTTACAGGAGAATATTCGGAAGGCTTACCGATTTATAAAGAAATCAAAGGAAGAGGCCCTTTTTCTGATGAGATTGCGCAATATGCCGTAGGTGCAGCAGTGAAATATAAATTATTACCAAGTGTGATTCTTTCGCAATACGGTTATGAGTCAGCGTTTGGTACGTCGGCGTCCGCAAGAAATGATCTCAACTATTTTGGGATT…
GCF_019662395.1	NZ_JAIFNQ0100000971.3920.AOI_01	63.3;Enterolysin_A	MENQDESLIKQYVKRRAKRRLFLWLFGTSAGLITILITVFVTLFLILAAGSIDNSDSDSSSGGETFTGEYSEGLPIYKEIKGRGPFSDEIAQYAVGAAVKYKLLPSVILSQYGYESAFGTSASARNDLNYFGITWFDGCLFPKGTARGIGGIEGGWYMKFPNSKAAFSYYGFMVATQSNFNACVGNKSPGASLLILGRGGYAAAGITGDSPYYTGCMSIITSNKLTEYDEFAIKHWGEGGNNNGTITGEWTNPFPGSSLDKSSFSGGQLFGTNPGGEFRPNGFHDGLDFGSVDHPGSEIHAVHVGKVVYVGNPGISGLGACVIVINYDGLNMVYQEFANSTGNSCVKVGDQVKVGQVIGIRDTAHLHLGFTRMDWRQAQGHAFTGDGTWIDPLPFLNSS…	ATGGAAAATCAAGATGAAAGTTTAATCAAGCAGTATGTTAAGCGTCGCGCAAAGCGGCGCTTATTTTTGTGGTTGTTTGGTACTTCTGCAGGTTTGATTACCATTTTGATCACTGTATTCGTGACCCTATTTTTAATACTTGCGGCTGGTTCGATTGATAATTCGGATTCAGATTCAAGCAGTGGTGGCGAAACTTTTACAGGAGAGTATTCGGAAGGATTGCCCATTTATAAAGAAATCAAAGGAAGAGGCCCTTTTTCTGATGAGATTGCGCAATATGCCGTAGGTGCAGCAGTGAAATATAAATTATTACCAAGTGTAATCCTTTCTCAATACGGTTACGAATCAGCGTTTGGTACGTCGGCGTCCGCAAGAAATGATCTCAACTATTTTGGAATT…
GCF_019662445.1	NZ_JAIFNR0100000431.4022.AOI_01	14.2;Bac32	LKKTKLLVASLCLFSSLLAFTPSVSFSQNGGVVEAAAQRGYIYKKYPKGAKVPNKVKMLVNIRGKQTMRTCYLMSWTASSRTAKYYYYI	TTGAAAAAAACAAAATTATTGGTAGCTAGTTTGTGTTTGTTTAGCAGTTTATTAGCTTTCACCCCTTCTGTTTCATTTTCTCAAAATGGTGGAGTGGTTGAAGCTGCTGCTCAAAGAGGATATATCTACAAAAAATATCCAAAAGGTGCTAAAGTGCCAAATAAAGTTAAAATGTTAGTAAATATTAGAGGTAAACAAACTATGCGTACTTGTTACCTTATGAGTTGGACTGCTAGTAGTAGAACAGCCAAATATTATTACTACATT
GCF_019662445.1	NZ_JAIFNR0100000581.4036.AOI_01	63.3;Enterolysin_A	MENQNESLIKQYVKRRAKRRLFLWLFGTSAGLITILITVFVTLFLILAAGSIDNSDSDSSSGGEAFTGEYSEGLPIYKEIKGRGPFSDEIAQYAVGAAVKYKLLPSVILSQYGYESAFGTSASARNDLNYFGITWFDGCLFPKGTARGIGGIEGGWYMKFPNSKAAFSYYGFMVATQSNFNACVGNKSPGASLLILGRGGYAAAGITEDSPYYTGCMSIITSNKLTEYDEFAMKHWGEGGNDNGTITGEWTNPFPGSSLDKSTFSGGQLFGTNPGGEFRPNGFHDGLDFGSVDHPGSEIHAVHGGKVLYVGNPGISGLGACVIVINYDGLNMVYQEFANSTGNSRVKVGDQVKVGQVIGIRDTAHLHLGFTRMDWRQAQGHAFTDDGTWIDPLPFLNSS…	ATGGAAAACCAAAATGAAAGTTTAATCAAGCAGTATGTTAAGCGTCGTGCAAAGCGACGCTTATTTTTGTGGTTGTTTGGTACTTCTGCAGGTTTGATTACTATTTTGATCACTGTGTTCGTGACCCTTTTTCTAATACTTGCGGCGGGTTCGATTGATAATTCTGATTCAGATTCAAGTAGTGGTGGCGAAGCTTTTACAGGAGAATATTCGGAAGGATTACCCATTTATAAAGAAATCAAAGGAAGAGGCCCTTTTTCTGATGAGATTGCGCAATATGCTGTAGGTGCAGCAGTGAAGTATAAATTATTACCAAGTGTGATCCTTTCGCAATACGGTTATGAATCAGCGTTTGGTACGTCGGCGTCTGCAAGAAATGATCTCAATTATTTTGGGATT…
GCF_019662445.1	NZ_JAIFNR0100000601.4076.AOI_01	87.2;Enterocin_L50b	MGAIAKLVTKFGWPLIKKFYKQIMQFIGQGWTIDQIEKWLKRH	ATGGGAGCAATCGCAAAACTAGTGACAAAGTTTGGGTGGCCACTAATCAAAAAATTCTACAAACAAATCATGCAATTTATTGGACAAGGATGGACAATAGATCAAATTGAAAAATGGCTAAAAAGACAT
GCF_019662445.1	NZ_JAIFNR0100000601.4076.AOI_01	86.2;Enterocin_L50a	VIYNYYEQKNDWRSYIMGAIAKLVAKFGWPIVKKYYKQIMQFIGEGWAINKIIEWIKKHI	GTGATATACAATTATTATGAACAAAAAAATGATTGGAGGAGTTATATTATGGGAGCAATCGCAAAATTAGTAGCAAAGTTTGGGTGGCCTATTGTTAAAAAGTATTACAAACAAATTATGCAGTTTATTGGAGAAGGATGGGCAATTAACAAAATCATTGAGTGGATTAAAAAACATATT
GCF_019662405.1	NZ_JAIFNS0100000011.3976.AOI_01	95.2;Enterocin_SE-K4	LILGIVLLSVSTLGITVDAATYYGNGVYCNTQKCWVDWSRARSEIVDRGVKAYVNGFTKVLGGVGGR	TTGATTTTAGGAATTGTTTTATTGAGTGTATCTACTTTAGGAATTACAGTAGATGCTGCAACTTATTATGGAAATGGTGTTTATTGTAATACTCAAAAATGTTGGGTAGATTGGAGTAGAGCTCGCTCTGAGATTGTTGATAGAGGAGTAAAAGCTTACGTTAATGGTTTTACGAAAGTGCTAGGTGGAGTCGGTGGAAGA
GCF_019662405.1	NZ_JAIFNS0100000011.3976.AOI_02	63.3;Enterolysin_A	MENQNESLIKQYVKRRAKRRLFLWLFGTSAGLITILITVFVTLFLILAAGSIDNSDSDSSSGGETFTGEYSEGLPIYKEIKGRGPFSDEIAQYAVGAAVKYKLLPSVILSQYGYESAFGTSASARNDLNYFGITWFDGCLFPKGTARGIGGIEGGWYMKFPNSKAAFSYYGFMVATQSNFNACVGNKSPGASLLILGRGGYAAAGITEDSPYYTGCMSIITSNKLTEYDEFAIKHWGEGGNNNGTITGEWTNPFPGSSLDKSSFSGGQLFGTNPGGEFRPNGFHDGLDFGSVDHQGSEIHAVHGGKVVYVGNPGISGLGACVIVINYDGLNMVYQEFANSTGNSRVKVGDQVKVGQVIGIRDTAHLHLGFTRMDWRQAQGHAFTDDGTWIDPLPFLNSS…	ATGGAAAACCAAAATGAAAGTTTAATCAAGCAGTATGTTAAGCGTCGTGCAAAGCGACGCTTATTTTTGTGGTTGTTTGGTACTTCTGCAGGTTTGATTACCATTTTGATCACTGTATTCGTGACCCTATTTTTAATACTTGCGGCTGGTTCGATTGATAATTCTGATTCAGATTCAAGCAGTGGTGGCGAAACTTTTACAGGAGAGTATTCGGAAGGATTGCCCATTTATAAAGAAATCAAAGGAAGAGGCCCTTTTTCTGATGAGATTGCGCAATATGCCGTAGGTGCAGCAGTGAAGTATAAATTATTACCAAGTGTGATCCTTTCGCAATACGGGTATGAATCAGCGTTTGGTACGTCGGCGTCTGCAAGAAATGATCTCAATTATTTTGGGATT…
GCF_019662365.1	NZ_JAIFNT0100000061.3795.AOI_01	63.3;Enterolysin_A	MENQNESLIKQYVKRRAKRRLFLWLFGTSAGLITILITVFVTLFLILAAGSIDNSDSDSSSGGEAFTGEYSEGLPIYKEIKGRGPFSDEIAQYAVGAAVKYKLLPSVILSQYGYESAFGTSASARNDLNYFGITWFDGCLFPKGTARGIGGIEGGWYMKFPNSKAAFSYYGFMVATQSNFNACVGNKSPGASLLILGRGGYAAAGITEDSPYYTGCMSIITSNKLTEYDEFAMKHWGEGGNDNGTITGEWTNPFPGSSLDKSTFSGGQLFGTNPGGEFRPNGFHDGLDFGSVDHPGSEIHAVHGGKVLYVGNPGISGLGACVIVINYDGLNMVYQEFANSTGNSRVKVGDQVKVGQVIGIRDTAHLHLGFTRMDWRQAQGHAFTDDGTWIDPLPFLNSS…	ATGGAAAACCAAAATGAAAGTTTAATCAAGCAGTATGTTAAGCGTCGTGCAAAGCGACGCTTATTTTTGTGGTTGTTTGGTACTTCTGCAGGTTTGATTACTATTTTGATCACTGTGTTCGTGACCCTTTTTCTAATACTTGCGGCGGGTTCGATTGATAATTCTGATTCAGATTCAAGTAGTGGTGGCGAAGCTTTTACAGGAGAATATTCGGAAGGATTACCCATTTATAAAGAAATCAAAGGAAGAGGCCCTTTTTCTGATGAGATTGCGCAATATGCTGTAGGTGCAGCAGTGAAGTATAAATTATTACCAAGTGTGATCCTTTCGCAATACGGTTATGAATCAGCGTTTGGTACGTCGGCGTCTGCAAGAAATGATCTCAATTATTTTGGGATT…
GCF_019662365.1	NZ_JAIFNT0100000511.3756.AOI_01	14.2;Bac32	LKKTKLLVASLCLFSSLLAFTPSVSFSQNGGVVEAAAQRGYIYKKYPKGAKVPNKVKMLVNIRGKQTMRTCYLMSWTASSRTAKYYYYI	TTGAAAAAAACAAAATTATTGGTAGCTAGTTTGTGTTTGTTTAGCAGTTTATTAGCTTTCACCCCTTCTGTTTCATTTTCTCAAAATGGTGGAGTGGTTGAAGCTGCTGCTCAAAGAGGATATATCTACAAAAAATATCCAAAAGGTGCTAAAGTGCCAAATAAAGTTAAAATGTTAGTAAATATTAGAGGTAAACAAACTATGCGTACTTGTTACCTTATGAGTTGGACTGCTAGTAGTAGAACAGCCAAATATTATTACTACATT
GCF_019662365.1	NZ_JAIFNT0100000691.3753.AOI_01	86.2;Enterocin_L50a	VIYNYYEQKNDWRSYIMGAIAKLVAKFGWPIVKKYYKQIMQFIGEGWAINKIIEWIKKHI	GTGATATACAATTATTATGAACAAAAAAATGATTGGAGGAGTTATATTATGGGAGCAATCGCAAAATTAGTAGCAAAGTTTGGGTGGCCTATTGTTAAAAAGTATTACAAACAAATTATGCAGTTTATTGGAGAAGGATGGGCAATTAACAAAATCATTGAGTGGATTAAAAAACATATT
GCF_019662365.1	NZ_JAIFNT0100000691.3753.AOI_01	87.2;Enterocin_L50b	MGAIAKLVTKFGWPLIKKFYKQIMQFIGQGWTIDQIEKWLKRH	ATGGGAGCAATCGCAAAACTAGTGACAAAGTTTGGGTGGCCACTAATCAAAAAATTCTACAAACAAATCATGCAATTTATTGGACAAGGATGGACAATAGATCAAATTGAAAAATGGCTAAAAAGACAT
GCF_019662385.1	NZ_JAIFNU0100000361.3856.AOI_01	76.2;EJ97enterocin	VISMKFKFNPTGTIVKKLTQYEIAWFKNKHGYYPWEIPRC	GTGATTTCCATGAAATTTAAATTTAATCCCACAGGAACCATCGTAAAAAAATTAACTCAATATGAAATAGCATGGTTCAAAAATAAACATGGATACTATCCATGGGAAATTCCTAGATGC
GCF_019662335.1	NZ_JAIFNV0100000151.3745.AOI_01	63.3;Enterolysin_A	MENQNESLIKQYVKRRAKRRLFLWLFGTSAGLITILITVYVTLFLILAAGSIDNSDSDSSSGGEVFGEAFTGEYSEGLPIYKEIKGRGPFSDEIAQYAVGAAVKYKLLPSVILSQYGYESAFGTSASARNDLNYFGITWFDGCLFPKGTARGIGGIEGGWYMKFPNSKAAFSYYGFMVATQSNFNASVGNKSPGASLLILGRGGYAAAGITEDSPYYTGCMSIITSNKLTEYDEFAIKHWGEGGNDNGTITGEWTNPFPGSSLDKSSFSGGQLFGTNPGGEFRPNGFHDGLDFGSVDHPGSEIHAVHGGKVVYVGNPGISGLGACVIVINYDGLNMVYQEFANSTGNSRVKVGDQVKVGQVIGIRDTAHLHLGFTRMDWRQAQGHAFTDDGTWIDPLPF…	ATGGAAAACCAAAATGAAAGTTTAATCAAGCAGTATGTTAAGCGTCGTGCAAAGCGACGCTTATTTTTGTGGTTGTTTGGTACTTCTGCAGGTTTGATTACTATTTTGATCACTGTGTACGTGACCCTTTTTCTAATACTGGCGGCGGGTTCGATTGATAATTCTGATTCAGATTCAAGCAGTGGTGGCGAAGTTTTTGGCGAAGCTTTTACAGGAGAATATTCGGAAGGATTACCCATTTATAAAGAAATCAAAGGAAGAGGCCCTTTTTCTGATGAGATTGCGCAATATGCTGTAGGTGCAGCAGTGAAATATAAATTATTACCAAGTGTGATCCTTTCGCAATACGGTTACGAATCAGCGTTTGGTACGTCGGCGTCCGCAAGAAATGATCTCAAT…
GCF_019662245.1	NZ_JAIFOA0100000631.3675.AOI_01	76.2;EJ97enterocin	VISMKFKFNPTGTIVKKLTQYEIAWFKNKHGYYPWEIPRC	GTGATTTCCATGAAATTTAAATTTAATCCCACAGGAACCATCGTAAAAAAATTAACTCAATATGAAATAGCATGGTTCAAAAATAAACATGGATACTATCCATGGGAAATTCCTAGATGC
GCF_019662205.1	NZ_JAIFOB0100000481.3290.AOI_01	63.3;Enterolysin_A	MENQNESLIKQYVKRRAKRRLFLWLFGTSAGLITILITVYVTLFLILAAGSIDNSDSDSSSGGEVFGEAFTGEYSEGLPIYKEIKGRGPFSDEIAQYAVGAAVKYKLLPSVILSQYGYESAFGTSASARNDLNYFGITWFDGCLFPKGTARGIGGIEGGWYMKFPNSKAAFSYYGFMVATQSNFNASVGNKSPGASLLILGRGGYAAAGITEDSPYYTGCMSIITSNKLTEYDEFAIKHWGEGGNDNGTITGEWTNPFPGSSLDKSSFSGGQLFGTNPGGEFRPNGFHDGLDFGSVDHPGSEIHAVHGGKVVYVGNPGISGLGACVIVINYDGLNMVYQEFANSTGNSRVKVGDQVKVGQVIGIRDTAHLHLGFTRMDWRQAQGHAFTDDGTWIDPLPF…	ATGGAAAACCAAAATGAAAGTTTAATCAAGCAGTATGTTAAGCGTCGTGCAAAGCGACGCTTATTTTTGTGGTTGTTTGGTACTTCTGCAGGTTTGATTACTATTTTGATCACTGTGTACGTGACCCTTTTTCTAATACTGGCGGCGGGTTCGATTGATAATTCTGATTCAGATTCAAGCAGTGGTGGCGAAGTTTTTGGCGAAGCTTTTACAGGAGAATATTCGGAAGGATTACCCATTTATAAAGAAATCAAAGGAAGAGGCCCTTTTTCTGATGAGATTGCGCAATATGCTGTAGGTGCAGCAGTGAAATATAAATTATTACCAAGTGTGATCCTTTCGCAATACGGTTACGAATCAGCGTTTGGTACGTCGGCGTCCGCAAGAAATGATCTCAAT…
GCF_019659205.1	NZ_JAIFOD0100000021.3127.AOI_01	63.3;Enterolysin_A	MENQNESLIKQYVKRRAKRRLFLWLFGTSAGLMTILITVFVTLFLILAAGSIDNSDSDSSSGGEAFTGEYSEGLPIYKEIKGRGPFSDEIAQYAVGAAVKYKLLPSVILSQYGYESAFGTSLSAKNDLNFFGITWFDGCLFPKGTARGIGGIEGGWYMKFPNSKAAFSYYGFMVATQSNFNASVGNKSPGVSLLILGRGGYAAAGITEDSPYYTGCMSIITSNKLTEYDELAIKHWGEGGNNNGTITGEWMNPFPGSSLDKSSFSGGQLFGTNPGGEFRPNGFHDGLDFGSVDHPGSEIHAVHGGKVVYVGNPGISGLGACVIVINYDGLNMVYQEFANSTGNSRVKVGDQVKVGQVIGIRDTAHLHLGFTRMDWRQAQGHAFTDDGTWIDPLPFLNSS…	ATGGAAAACCAAAATGAAAGTTTAATCAAGCAGTATGTTAAGCGTCGTGCAAAGCGGCGCTTATTTTTGTGGTTGTTTGGTACTTCTGCAGGTTTGATGACTATTTTGATCACTGTGTTTGTGACCCTATTTCTAATACTTGCCGCGGGATCGATTGATAATTCGGATTCAGATTCAAGCAGTGGTGGCGAAGCTTTTACAGGAGAATATTCGGAAGGATTACCCATTTATAAAGAAATCAAAGGAAGAGGCCCTTTTTCTGATGAAATTGCGCAATATGCTGTAGGTGCAGCAGTGAAATACAAATTATTGCCAAGTGTGATCCTATCGCAATACGGGTATGAATCGGCATTTGGAACGTCTCTATCTGCTAAAAACGACTTGAATTTTTTCGGAATT…
GCF_019659205.1	NZ_JAIFOD0100000451.3077.AOI_01	91.2;Enterocin_P	VTNFGTKVDAVTRSYDNGIYCNNSKCWVNWGEAKENIAGIVISGWASGLAGMGH	GTGACGAATTTTGGTACAAAAGTTGATGCAGTTACGCGTTCATATGATAATGGTATTTATTGTAATAATAGTAAGTGCTGGGTTAACTGGGGAGAAGCTAAAGAAAATATTGCAGGAATTGTTATTAGTGGCTGGGCTTCTGGCTTGGCAGGTATGGGACAT
GCF_019662215.1	NZ_JAIFOE0100000691.3353.AOI_01	63.3;Enterolysin_A	MENQNESLIKQYVKRRAKRRLFLWLFGTSAGLMTILITVFVTLFLILAAGSIDNSDSDSSSGGEAFTGEYSEGLPIYKEIKGRGPFSDEIAQYAVGAAVKYKLLPSVILSQYGYESAFGTSLSAKNDLNFFGITWFDGCLFPKGTARGIGGIEGGWYMKFPNSKAAFSYYGFMVATQSNFNASVGNKSPGVSLLILGRGGYAAAGITEDSPYYTGCMSIITSNKLTEYDELAIKHWGEGGNNNGTITGEWMNPFPGSSLDKSSFSGGQLFGTNPGGEFRPNGFHDGLDFGSVDHPGSEIHAVHGGKVVYVGNPGISGLGACVIVINYDGLNMVYQEFANSTGNSRVKVGDQVKVGQVIGIRDTAHLHLGFTRMDWRQAQGHAFTDDGTWIDPLPFLNSS…	ATGGAAAACCAAAATGAAAGTTTAATCAAGCAGTATGTTAAGCGTCGTGCAAAGCGGCGCTTATTTTTGTGGTTGTTTGGTACTTCTGCAGGTTTGATGACTATTTTGATCACTGTGTTTGTGACCCTATTTCTAATACTTGCCGCGGGATCGATTGATAATTCGGATTCAGATTCAAGCAGTGGTGGCGAAGCTTTTACAGGAGAATATTCGGAAGGATTACCCATTTATAAAGAAATCAAAGGAAGAGGCCCTTTTTCTGATGAAATTGCGCAATATGCTGTAGGTGCAGCAGTGAAATACAAATTATTGCCAAGTGTGATCCTATCGCAATACGGGTATGAATCGGCATTTGGAACGTCTCTATCTGCTAAAAACGACTTGAATTTTTTCGGAATT…
GCF_019662215.1	NZ_JAIFOE0100000691.3353.AOI_01	69.2;Divergicin_M35	MFQLMKWYWVTAIQGGLYAILLWFFLHNDFDFSVHRLVVGSLFYLCMIGVINYTIYKRNTRP	ATGTTTCAATTAATGAAATGGTACTGGGTAACCGCAATTCAAGGGGGGCTTTACGCAATACTATTGTGGTTTTTTCTTCATAATGATTTCGATTTTTCAGTGCACAGACTAGTTGTAGGTAGCTTATTTTATCTTTGTATGATAGGGGTTATTAATTACACAATTTACAAAAGAAACACACGCCCG
GCF_019659185.1	NZ_JAIFOF0100000691.3045.AOI_01	63.3;Enterolysin_A	MENQNESLIKQYVKRRAKRRLFLWLFGTSAGLITILITVFVTLFLILAAGSIDNSDSDSSSGGETFTGEYSEGLPIYKEIKGRGPFSDEIAQYAVGAAVKYKLLPSVILSQYGYESAFGTSASARNDLNYFGITWFDGCLFPKGTARGIGGIEGGWYMKFPNSKAAFSYYGFMVATQSNFNACVGNKSPGASLLILGRGGYAAAGITEDSPYYTGCMSIITSNKLTEYDEFAIKHWGEGGNNNGTITGEWTNPFPGSSLDKSSFSGGQLFGTNPGGEFRPNGFHDGLDFGSVDHQGSEIHAVHGGKVVYVGNPGISGLGACVIVINYDGLNMVYQEFANSTGNSRVKVGDQVKVGQVIGIRDTAHLHLGFTRMDWRQAQGHAFTDDGTWIDPLPFLNSS…	ATGGAAAACCAAAATGAAAGTTTAATCAAGCAGTATGTTAAGCGTCGTGCAAAGCGACGCTTATTTTTGTGGTTGTTTGGTACTTCTGCAGGTTTGATTACCATTTTGATCACTGTATTCGTGACCCTATTTTTAATACTTGCGGCTGGTTCGATTGATAATTCTGATTCAGATTCAAGCAGTGGTGGCGAAACTTTTACAGGAGAGTATTCGGAAGGATTGCCCATTTATAAAGAAATCAAAGGAAGAGGCCCTTTTTCTGATGAGATTGCGCAATATGCCGTAGGTGCAGCAGTGAAGTATAAATTATTACCAAGTGTGATCCTTTCGCAATACGGGTATGAATCAGCGTTTGGTACGTCGGCGTCTGCAAGAAATGATCTCAATTATTTTGGGATT…
GCF_019659185.1	NZ_JAIFOF0100000691.3045.AOI_02	95.2;Enterocin_SE-K4	LILGIVLLSVSTLGITVDAATYYGNGVYCNTQKCWVDWSRARSEIVDRGVKAYVNGFTKVLGGVGGR	TTGATTTTAGGAATTGTTTTATTGAGTGTATCTACTTTAGGAATTACAGTAGATGCTGCAACTTATTATGGAAATGGTGTTTATTGTAATACTCAAAAATGTTGGGTAGATTGGAGTAGAGCTCGCTCTGAGATTGTTGATAGAGGAGTAAAAGCTTACGTTAATGGTTTTACGAAAGTGCTAGGTGGAGTCGGTGGAAGA
GCF_019659145.1	NZ_JAIFOH0100000431.2964.AOI_01	63.3;Enterolysin_A	MENQNESLIKQYVKRRAKRRLFLWLFGTSAGLITILITVFVTLFLILAAGSIDNSDSDSSSGGETFTGEYSEGLPIYKEIKGRGPFSDEIAQYAVGAAVKYKLLPSVILSQYGYESAFGTSASARNDLNYFGITWFDGCLFPKGTARGIGGIEGGWYMKFPNSKAAFSYYGFMVATQSNFNACVGNKSPGASLLILGRGGYAAAGITEDSPYYTGCMSIITSNKLTEYDEFAIKHWGEGGNNNGTITGEWTNPFPGSSLDKSSFSGGQLFGTNPGGEFRPNGFHDGLDFGSVDHQGSEIHAVHGGKVVYVGNPGISGLGACVIVINYDGLNMVYQEFANSTGNSRVKVGDQVKVGQVIGIRDTAHLHLGFTRMDWRQAQGHAFTDDGTWIDPLPFLNSS…	ATGGAAAACCAAAATGAAAGTTTAATCAAGCAGTATGTTAAGCGTCGTGCAAAGCGACGCTTATTTTTGTGGTTGTTTGGTACTTCTGCAGGTTTGATTACCATTTTGATCACTGTATTCGTGACCCTATTTTTAATACTTGCGGCTGGTTCGATTGATAATTCTGATTCAGATTCAAGCAGTGGTGGCGAAACTTTTACAGGAGAGTATTCGGAAGGATTGCCCATTTATAAAGAAATCAAAGGAAGAGGCCCTTTTTCTGATGAGATTGCGCAATATGCCGTAGGTGCAGCAGTGAAGTATAAATTATTACCAAGTGTGATCCTTTCGCAATACGGGTATGAATCAGCGTTTGGTACGTCGGCGTCTGCAAGAAATGATCTCAATTATTTTGGGATT…
GCF_019662145.1	NZ_JAIFOI0100000731.3220.AOI_01	76.2;EJ97enterocin	VISMKFKFNPTGTIVKKLTQYEIAWFKNKHGYYPWEIPRC	GTGATTTCCATGAAATTTAAATTTAATCCCACAGGAACCATCGTAAAAAAATTAACTCAATATGAAATAGCATGGTTCAAAAATAAACATGGATACTATCCATGGGAAATTCCTAGATGC
GCF_020406935.1	NZ_JAIZES0100000261.4673.AOI_01	91.2;Enterocin_P	MRKKLFSLALIGIFGLVVTNFGTKVDAATRSYGNGVYCNNSKCWVNWGEAKENIAGIVISGWASGLAGMGH	ATGAGAAAAAAATTATTTAGTTTAGCTCTTATTGGAATATTTGGGTTAGTTGTGACAAATTTTGGTACAAAAGTTGATGCAGCTACGCGTTCATATGGTAATGGTGTTTATTGTAATAATAGTAAATGCTGGGTTAACTGGGGAGAAGCTAAAGAGAATATTGCAGGAATCGTTATTAGTGGCTGGGCTTCTGGTTTGGCAGGTATGGGACAT
GCF_020406935.1	NZ_JAIZES0100000261.4673.AOI_01	95.2;Enterocin_SE-K4	LILGIVLLSVSTLGITVDAATYYGNGVYCNTQKCWVDWSRARSEIVDRGVKAYVNGFTKVLGGVGGR	TTGATTTTAGGAATTGTTTTATTGAGTGTATCTACTTTAGGAATTACAGTAGATGCTGCAACTTATTATGGAAATGGTGTTTATTGTAATACTCAAAAATGTTGGGTAGATTGGAGTAGAGCTCGCTCTGAGATTGTTGATAGAGGAGTAAAAGCTTACGTTAATGGTTTTACGAAAGTGCTAGGTGGAGTCGGTGGAAGA
GCF_020406935.1	NZ_JAIZES0100000311.4670.AOI_01	87.2;Enterocin_L50b	MGAIAKLVTKFGWPLIKKFYKQIMQFIGQGWTIDQIEKWLKRH	ATGGGAGCAATCGCAAAACTAGTGACAAAGTTTGGGTGGCCACTAATCAAAAAATTCTACAAACAAATCATGCAATTTATTGGACAAGGATGGACAATAGATCAAATTGAAAAATGGCTAAAAAGACAT
GCF_020406935.1	NZ_JAIZES0100000311.4670.AOI_01	86.2;Enterocin_L50a	VIYNYYEQKNDWRSYIMGAIAKLVAKFGWPIVKKYYKQIMQFIGEGWAINKIIEWIKKHI	GTGATATACAATTATTATGAACAAAAAAATGATTGGAGGAGTTATATTATGGGAGCAATCGCAAAATTAGTAGCAAAGTTTGGGTGGCCTATTGTTAAAAAGTATTACAAACAAATTATGCAGTTTATTGGAGAAGGATGGGCAATTAACAAAATCATTGAGTGGATTAAAAAACATATT
GCF_020405685.1	NZ_JAIZEX0100000171.4305.AOI_01	63.3;Enterolysin_A	MENQNESLIKQYVKRRAKRRLFLWLFGTSAGLMTILITVFVTLFLILAAGSIDNSDSDSSSGGEAFTGEYSEGLPIYKEIKGRGPFSDEIAQYAVGAAVKYKLLPSVILSQYGYESAFGTSASARNDLNYFGITWFDGCLFPKGTARGIGGIEGGWYMKFPNSKAALSYYGFMVATQSNFNACVGNKSPGASLLILGRGGYAAAGITEDSPYYTGCMSIITSNKLTEYDEFAMKHWGEGGNDNGTITGEWTNPFPGSSLDKSSFSGGQLFGTNPGGEFRPNGFHDGLDFGSVDHPGSEIHAVHGGKVVYVGNPGISGLGACVIVINYDGLNMVYQEFANSTGNSRVKVGDQVKVGQVIGIRDTAHLHLGFTRMDWRQAQGHAFTDDGTWIDPLPFLNSS…	ATGGAAAACCAAAATGAAAGTTTAATCAAGCAGTATGTTAAGCGTCGTGCAAAGCGACGCTTATTTTTGTGGTTGTTTGGTACTTCTGCAGGTTTGATGACTATTTTGATCACTGTGTTCGTGACCCTTTTTCTAATACTTGCGGCGGGTTCGATTGATAATTCGGATTCAGATTCAAGCAGTGGTGGCGAAGCTTTTACAGGAGAATATTCGGAAGGATTACCCATTTATAAAGAAATCAAAGGAAGAGGCCCTTTTTCTGATGAGATTGCGCAATATGCTGTAGGTGCAGCAGTGAAATATAAATTATTACCAAGTGTGATCCTTTCGCAATACGGTTACGAATCAGCGTTTGGTACGTCGGCGTCCGCAAGAAATGATCTCAACTATTTTGGGATT…
GCF_020405685.1	NZ_JAIZEX0100000271.4294.AOI_01	95.2;Enterocin_SE-K4	LILGIVLLSVSTLGITVDAATYYGNGVYCNTQKCWVDWSRARSEIVDRGVKAYVNGFTKVLGGVGGR	TTGATTTTAGGAATTGTTTTATTGAGTGTATCTACTTTAGGAATTACAGTAGATGCTGCAACTTATTATGGAAATGGTGTTTATTGTAATACTCAAAAATGTTGGGTAGATTGGAGTAGAGCTCGCTCTGAGATTGTTGATAGAGGAGTAAAAGCTTACGTTAATGGTTTTACGAAAGTGCTAGGTGGAGTCGGTGGAAGA
GCF_020405685.1	NZ_JAIZEX0100000291.4308.AOI_01	91.2;Enterocin_P	MRKKLFSLALIGIFGLVVTNFGTKVDAATRSYGNGVYCNNSKCWVNWGEAKENIAGIVISGWASGLAGMGH	ATGAGAAAAAAATTATTTAGTTTAGCTCTTATTGGAATATTTGGGTTAGTTGTGACAAATTTTGGTACAAAAGTTGATGCAGCTACGCGTTCATATGGTAATGGTGTTTATTGTAATAATAGTAAATGCTGGGTTAACTGGGGAGAAGCTAAAGAGAATATTGCAGGAATCGTTATTAGTGGCTGGGCTTCTGGTTTGGCAGGTATGGGACAT
GCF_020405655.1	NZ_JAIZEY0100000201.4170.AOI_01	95.2;Enterocin_SE-K4	LILGIVLLSVSTLGITVDAATYYGNGVYCNTQKCWVDWSRARSEIVDRGVKAYVNGFTKVLGGVGGR	TTGATTTTAGGAATTGTTTTATTGAGTGTATCTACTTTAGGAATTACAGTAGATGCTGCAACTTATTATGGAAATGGTGTTTATTGTAATACTCAAAAATGTTGGGTAGATTGGAGTAGAGCTCGCTCTGAGATTGTTGATAGAGGAGTAAAAGCTTACGTTAATGGTTTTACGAAAGTGCTAGGTGGAGTCGGTGGAAGA
GCF_020405655.1	NZ_JAIZEY0100000201.4170.AOI_02	63.3;Enterolysin_A	MENQNESLIKQYVKRRAKRRLFLWLFGTSAGLMTILITVFVTLFLILAAGSIDNSDSDSSSGGEAFTGEYSEGLPIYKEIKGRGPFSDEIAQYAVGAAVKYKLLPSVILSQYGYESAFGTSLSAKNDLNFFGITWFDGCLFPKGTARGIGGIEGGWYMKFPNSKAAFSYYGFMVATQSNFNASVGNKSPGASLLILGRGGYAAAGITEDSPYYTGCMSIITSNKLTEYDEFAIKHWGEGGNNNGTITGEWTNPFPSSSLDKSSFSGGQLFGTNPGGEFRPNGFHDGLDFGSVDHPGSEIHAVHGGKVVYVGNPGISGLGACVIVINYDGLNMVYQEFANSTGNSRVKVGDQVKVGQVIGIRDTAHLHLGFTRMDWRQAQGHAFTDDGTWIDPLPFLNSS…	ATGGAAAACCAAAATGAAAGTTTAATCAAGCAGTATGTTAAGCGTCGTGCAAAGCGACGCTTATTTTTGTGGTTGTTTGGTACTTCTGCAGGTTTGATGACTATTTTGATCACTGTGTTCGTGACCCTATTTCTAATACTTGCGGCGGGTTCGATTGATAATTCGGATTCAGATTCAAGCAGTGGTGGCGAAGCTTTTACAGGAGAATATTCGGAAGGATTACCGATTTATAAAGAAATCAAAGGGAGAGGCCCATTTTCAGATGAAATTGCGCAATATGCGGTAGGAGCAGCCGTAAAATACAAATTATTGCCAAGTGTGATCCTATCGCAATACGGGTATGAATCGGCATTTGGAACGTCTCTATCTGCTAAAAACGACTTGAATTTTTTCGGAATT…
GCF_020405655.1	NZ_JAIZEY0100000551.4229.AOI_01	51.2;Carnocin_CP52	MDKQQELLNLLSKAYNDPKINEYEGLKDKLFECASRLTNNEVNIGEVCYKLSTIISKYLVTHNFKITESIIELQNFVTKESQKYRGWASIGIWS	ATGGACAAGCAACAAGAATTACTGAATTTACTTAGTAAAGCGTATAATGATCCTAAAATAAATGAATACGAAGGGTTAAAAGATAAGTTATTTGAATGTGCAAGCAGATTAACAAATAACGAAGTAAATATCGGTGAAGTTTGTTATAAATTAAGTACAATTATCAGTAAATATCTAGTAACACATAATTTTAAAATAACTGAATCAATTATTGAATTGCAAAATTTTGTGACTAAAGAGAGCCAAAAATATAGGGGATGGGCGTCTATCGGTATTTGGAGT
GCF_020405655.1	NZ_JAIZEY0100000551.4229.AOI_01	16.2;Bacteriocin_31	VKKKFVSIFMILGIVLLSVSTLGITVDAATYYGNGVYCNKQKCWVDWNKASKEIGKIIVNGWVQHGPWAPR	GTGAAGAAAAAATTTGTTAGTATTTTTATGATTTTAGGAATTGTTTTATTGAGTGTATCTACTTTAGGAATTACAGTAGATGCTGCAACTTATTATGGAAATGGTGTATATTGTAATAAACAAAAATGTTGGGTAGATTGGAATAAAGCTTCAAAAGAAATAGGAAAAATTATTGTTAATGGTTGGGTGCAACATGGACCTTGGGCTCCTAGA
GCF_020405655.1	NZ_JAIZEY0100000631.4178.AOI_01	76.2;EJ97enterocin	VISMKFKFNPTGTIVKKLTQYEIAWFKNKHGYYPWEIPRC	GTGATTTCCATGAAATTTAAATTTAATCCCACAGGAACCATCGTAAAAAAATTAACTCAATATGAAATAGCATGGTTCAAAAATAAACATGGATACTATCCATGGGAAATTCCTAGATGC
GCF_020405815.1	NZ_JAIZFC0100000211.4425.AOI_01	95.2;Enterocin_SE-K4	LILGIVLLSVSTLGITVDAATYYGNGVYCNTQKCWVDWSRARSEIVDRGVKAYVNGFTKVLGGVGGR	TTGATTTTAGGAATTGTTTTATTGAGTGTATCTACTTTAGGAATTACAGTAGATGCTGCAACTTATTATGGAAATGGTGTTTATTGTAATACTCAAAAATGTTGGGTAGATTGGAGTAGAGCTCGCTCTGAGATTGTTGATAGAGGAGTAAAAGCTTACGTTAATGGTTTTACGAAAGTGCTAGGTGGAGTCGGTGGAAGA
GCF_020405815.1	NZ_JAIZFC0100000211.4425.AOI_02	63.3;Enterolysin_A	MENQDESLIKQYVKRRAKRRLFLWLFGTSAGLITILITVFVTLFLILAAGSIDNSDSDSSSGGETFTGEYSEGLPIYKEIKGRGPFSDEIAQYAVGAAVKYKLLPSVILSQYGYESAFGTSASARNDLNYFGITWFDGCLFPKGTARGIGGIEGGWYMKFPNSKAAFSYYGFMVATQSNFNACVGNKSPGASLLILGRGGYAAAGITEDSPYYTGCMSIITSNKLTEYDEFAIKHWGEGGNNNGTITGEWTNPFPGSSLDKSSFSGGQLFGTNPGGEFRPNGFHDGLDFGSVDHPGSEIHAVHVGKVVYVGNPGISGLGACVIVINYDGLNMVYQEFANSTGNSCVKVGDQVKVGQVIGIRDTAHLHLGFTRMDWRQAQGHAFTGDGTWIDPLPFLNSS…	ATGGAAAATCAAGATGAAAGTTTAATCAAGCAGTATGTTAAGCGTCGCGCAAAGCGGCGCTTATTTTTGTGGTTGTTTGGTACTTCTGCAGGTTTGATTACCATTTTGATCACTGTATTCGTGACCCTATTTTTAATACTTGCGGCTGGTTCGATTGATAATTCGGATTCAGATTCAAGCAGTGGTGGCGAAACTTTTACAGGAGAGTATTCGGAAGGATTGCCCATTTATAAAGAAATCAAAGGAAGAGGCCCTTTTTCTGATGAGATTGCGCAATATGCCGTAGGTGCAGCAGTGAAATATAAATTATTACCAAGTGTAATCCTTTCTCAATACGGTTACGAATCAGCGTTTGGTACGTCGGCGTCCGCAAGAAATGATCTCAACTATTTTGGAATT…
GCF_020405815.1	NZ_JAIZFC0100000331.4451.AOI_01	87.2;Enterocin_L50b	MGAIAKLVTKFGWPLIKKFYKQIMQFIGQGWTIDQIEKWLKRH	ATGGGAGCAATCGCAAAACTAGTGACAAAGTTTGGGTGGCCACTAATCAAAAAATTCTACAAACAAATCATGCAATTTATTGGACAAGGATGGACAATAGATCAAATTGAAAAATGGCTAAAAAGACAT
GCF_020405815.1	NZ_JAIZFC0100000331.4451.AOI_01	86.2;Enterocin_L50a	VIYNYYEQKNDWRSYIMGAIAKLVAKFGWPIVKKYYKQIMQFIGEGWAINKIIEWIKKHI	GTGATATACAATTATTATGAACAAAAAAATGATTGGAGGAGTTATATTATGGGAGCAATCGCAAAATTAGTAGCAAAGTTTGGGTGGCCTATTGTTAAAAAGTATTACAAACAAATTATGCAGTTTATTGGAGAAGGATGGGCAATTAACAAAATCATTGAGTGGATTAAAAAACATATT
GCF_020405815.1	NZ_JAIZFC0100000351.4442.AOI_01	91.2;Enterocin_P	MRKKLFSLALIGIFGLVVTNFGTKVDAATRSYGNGVYCNNSKCWVNWGEAKENIAGIVISGWASGLAGMGH	ATGAGAAAAAAATTATTTAGTTTAGCTCTTATTGGAATATTTGGGTTAGTTGTGACAAATTTTGGTACAAAAGTTGATGCAGCTACGCGTTCATATGGTAATGGTGTTTATTGTAATAATAGTAAATGCTGGGTTAACTGGGGAGAAGCTAAAGAGAATATTGCAGGAATCGTTATTAGTGGCTGGGCTTCTGGTTTGGCAGGTATGGGACAT
GCF_020405675.1	NZ_JAIZFG0100000151.4250.AOI_01	91.2;Enterocin_P	MRKKLFSLTLIGMFGLVVTNFGTKVDAATRSYGNGVYCNNSKCWVNWGEAKENIAGIVISGWASGLAGMGH	ATGAGAAAAAAATTATTTAGTTTAACTCTTATTGGAATGTTTGGATTAGTTGTGACGAATTTTGGTACAAAAGTTGATGCAGCTACGCGTTCATATGGTAATGGTGTTTATTGTAATAATAGTAAGTGCTGGGTTAACTGGGGAGAAGCTAAAGAAAATATTGCAGGAATTGTTATTAGTGGCTGGGCTTCTGGCTTGGCAGGTATGGGACAT
GCF_020405675.1	NZ_JAIZFG0100000211.4259.AOI_01	95.2;Enterocin_SE-K4	LILGIVLLSVSTLGITVDAATYYGNGVYCNTQKCWVDWSRARSEIVDRGVKAYVNGFTKVLGGVGGR	TTGATTTTAGGAATTGTTTTATTGAGTGTATCTACTTTAGGAATTACAGTAGATGCTGCAACTTATTATGGAAATGGTGTTTATTGTAATACTCAAAAATGTTGGGTAGATTGGAGTAGAGCTCGCTCTGAGATTGTTGATAGAGGAGTAAAAGCTTACGTTAATGGTTTTACGAAAGTGCTAGGTGGAGTCGGTGGAAGA
GCF_020405675.1	NZ_JAIZFG0100000211.4259.AOI_02	63.3;Enterolysin_A	MENQDESLIKQYVKRRAKRRLFLWLFGTSAGLITILITVFVTLFLILAAGSIDNSDSDSSSGGETFTGEYSEGLPIYKEIKGRGPFSDEIAQYAVGAAVKYKLLPSVILSQYGYESAFGTSASARNDLNYFGITWFDGCLFPKGTARGIGGIEGGWYMKFPNSKAAFSYYGFMVATQSNFNACVGNKSPGASLLILGRGGYAAAGITEDSPYYTGCMSIITSNKLTEYDEFAMKHWGEGGNDNGTITGEWTNPFPGSSLDKSSFSGGQLFGTNPGGEFRPNGFHDGLDFGSVDHPGSEIHAVHGGKVVYVGNPGISGLGACVIVINYDGLNMVYQEFANSTGNSRVKVGDQVKVGQVIGIRDTAHLHLGFTRMDWRQAQGHAFTDDGTWIDPLPFLNSS…	ATGGAAAATCAAGATGAAAGTTTAATCAAGCAGTATGTTAAGCGTCGCGCAAAGCGGCGCTTATTTTTGTGGTTGTTTGGTACTTCTGCAGGTTTGATTACCATTTTGATCACTGTATTCGTGACCCTATTTTTAATACTTGCGGCTGGTTCGATTGATAATTCTGATTCAGATTCAAGCAGTGGTGGCGAAACTTTTACAGGAGAGTATTCGGAAGGATTGCCCATTTATAAAGAAATCAAAGGAAGAGGCCCTTTTTCTGATGAGATTGCGCAATATGCCGTAGGTGCAGCAGTGAAATATAAATTATTACCAAGTGTAATCCTTTCTCAATACGGTTACGAATCAGCGTTTGGTACGTCGGCGTCCGCAAGAAATGATCTCAACTATTTTGGGATT…
GCF_020405675.1	NZ_JAIZFG0100000381.4258.AOI_01	86.2;Enterocin_L50a	VIYNYYEQKNDWRSYIMGAIAKLVAKFGWPIVKKYYKQIMQFIGEGWAINKIIEWIKKHI	GTGATATACAATTATTATGAACAAAAAAATGATTGGAGGAGTTATATTATGGGAGCAATCGCAAAATTAGTAGCAAAGTTTGGGTGGCCTATTGTTAAAAAGTATTACAAACAAATTATGCAGTTTATTGGAGAAGGATGGGCAATTAACAAAATCATTGAGTGGATTAAAAAACATATT
GCF_020405675.1	NZ_JAIZFG0100000381.4258.AOI_01	87.2;Enterocin_L50b	MGAIAKLVTKFGWPLIKKFYKQIMQFIGQGWTIDQIEKWLKRH	ATGGGAGCAATCGCAAAACTAGTGACAAAGTTTGGGTGGCCACTAATCAAAAAATTCTACAAACAAATCATGCAATTTATTGGACAAGGATGGACAATAGATCAAATTGAAAAATGGCTAAAAAGACAT
GCF_020406915.1	NZ_JAIZFL0100000211.4632.AOI_01	95.2;Enterocin_SE-K4	LILGIVLLSVSTLGITVDAATYYGNGVYCNTQKCWVDWSRARSEIVDRGVKAYVNGFTKVLGGVGGR	TTGATTTTAGGAATTGTTTTATTGAGTGTATCTACTTTAGGAATTACAGTAGATGCTGCAACTTATTATGGAAATGGTGTTTATTGTAATACTCAAAAATGTTGGGTAGATTGGAGTAGAGCTCGCTCTGAGATTGTTGATAGAGGAGTAAAAGCTTACGTTAATGGTTTTACGAAAGTGCTAGGTGGAGTCGGTGGAAGA
GCF_020406915.1	NZ_JAIZFL0100000211.4632.AOI_02	63.3;Enterolysin_A	MENQDESLIKQYVKRRAKRRLFLWLFGTSAGLITILITVFVTLFLILAAGSIDNSDSDSSSGGETFTGEYSEGLPIYKEIKGRGPFSDEIAQYAVGAAVKYKLLPSVILSQYGYESAFGTSASARNDLNYFGITWFDGCLFPKGTARGIGGIEGGWYMKFPNSKAAFSYYGFMVATQSNFNACVGNKSPGASLLILGRGGYAAAGITEDSPYYTGCMSIITSNKLTEYDEFAIKHWGEGGNNNGTITGEWTNPFPGSSLDKSSFSGGQLFGTNPGGEFRPNGFHDGLDFGSVDHPGSEIHAVHVGKVVYVGNPGISGLGACVIVINYDGLNMVYQEFANSTGNSCVKVGDQVKVGQVIGIRDTAHLHLGFTRMDWRQAQGHAFTGDGTWIDPLPFLNSS…	ATGGAAAATCAAGATGAAAGTTTAATCAAGCAGTATGTTAAGCGTCGCGCAAAGCGGCGCTTATTTTTGTGGTTGTTTGGTACTTCTGCAGGTTTGATTACCATTTTGATCACTGTATTCGTGACCCTATTTTTAATACTTGCGGCTGGTTCGATTGATAATTCGGATTCAGATTCAAGCAGTGGTGGCGAAACTTTTACAGGAGAGTATTCGGAAGGATTGCCCATTTATAAAGAAATCAAAGGAAGAGGCCCTTTTTCTGATGAGATTGCGCAATATGCCGTAGGTGCAGCAGTGAAATATAAATTATTACCAAGTGTAATCCTTTCTCAATACGGTTACGAATCAGCGTTTGGTACGTCGGCGTCCGCAAGAAATGATCTCAACTATTTTGGAATT…
GCF_020406915.1	NZ_JAIZFL0100000341.4619.AOI_01	86.2;Enterocin_L50a	VIYNYYEQKNDWRSYIMGAIAKLVAKFGWPIVKKYYKQIMQFIGEGWAINKIIEWIKKHI	GTGATATACAATTATTATGAACAAAAAAATGATTGGAGGAGTTATATTATGGGAGCAATCGCAAAATTAGTAGCAAAGTTTGGGTGGCCTATTGTTAAAAAGTATTACAAACAAATTATGCAGTTTATTGGAGAAGGATGGGCAATTAACAAAATCATTGAGTGGATTAAAAAACATATT
GCF_020406915.1	NZ_JAIZFL0100000341.4619.AOI_01	87.2;Enterocin_L50b	MGAIAKLVTKFGWPLIKKFYKQIMQFIGQGWTIDQIEKWLKRH	ATGGGAGCAATCGCAAAACTAGTGACAAAGTTTGGGTGGCCACTAATCAAAAAATTCTACAAACAAATCATGCAATTTATTGGACAAGGATGGACAATAGATCAAATTGAAAAATGGCTAAAAAGACAT
GCF_020406915.1	NZ_JAIZFL0100000431.4596.AOI_01	91.2;Enterocin_P	MRKKLFSLALIGIFGLVVTNFGTKVDAATRSYGNGVYCNNSKCWVNWGEAKENIAGIVISGWASGLAGMGH	ATGAGAAAAAAATTATTTAGTTTAGCTCTTATTGGAATATTTGGGTTAGTTGTGACAAATTTTGGTACAAAAGTTGATGCAGCTACGCGTTCATATGGTAATGGTGTTTATTGTAATAATAGTAAATGCTGGGTTAACTGGGGAGAAGCTAAAGAGAATATTGCAGGAATCGTTATTAGTGGCTGGGCTTCTGGTTTGGCAGGTATGGGACAT
GCF_020405785.1	NZ_JAIZFM0100000211.4419.AOI_01	95.2;Enterocin_SE-K4	LILGIVLLSVSTLGITVDAATYYGNGVYCNTQKCWVDWSRARSEIVDRGVKAYVNGFTKVLGGVGGR	TTGATTTTAGGAATTGTTTTATTGAGTGTATCTACTTTAGGAATTACAGTAGATGCTGCAACTTATTATGGAAATGGTGTTTATTGTAATACTCAAAAATGTTGGGTAGATTGGAGTAGAGCTCGCTCTGAGATTGTTGATAGAGGAGTAAAAGCTTACGTTAATGGTTTTACGAAAGTGCTAGGTGGAGTCGGTGGAAGA
GCF_020405785.1	NZ_JAIZFM0100000211.4419.AOI_02	63.3;Enterolysin_A	MENQDESLIKQYVKRRAKRRLFLWLFGTSAGLITILITVFVTLFLILAAGSIDNSDSDSSSGGETFTGEYSEGLPIYKEIKGRGPFSDEIAQYAVGAAVKYKLLPSVILSQYGYESAFGTSASARNDLNYFGITWFDGCLFPKGTARGIGGIEGGWYMKFPNSKAAFSYYGFMVATQSNFNACVGNKSPGASLLILGRGGYAAAGITEDSPYYTGCMSIITSNKLTEYDEFAIKHWGEGGNNNGTITGEWTNPFPGSSLDKSSFSGGQLFGTNPGGEFRPNGFHDGLDFGSVDHPGSEIHAVHVGKVVYVGNPGISGLGACVIVINYDGLNMVYQEFANSTGNSCVKVGDQVKVGQVIGIRDTAHLHLGFTRMDWRQAQGHAFTGDGTWIDPLPFLNSS…	ATGGAAAATCAAGATGAAAGTTTAATCAAGCAGTATGTTAAGCGTCGCGCAAAGCGGCGCTTATTTTTGTGGTTGTTTGGTACTTCTGCAGGTTTGATTACCATTTTGATCACTGTATTCGTGACCCTATTTTTAATACTTGCGGCTGGTTCGATTGATAATTCGGATTCAGATTCAAGCAGTGGTGGCGAAACTTTTACAGGAGAGTATTCGGAAGGATTGCCCATTTATAAAGAAATCAAAGGAAGAGGCCCTTTTTCTGATGAGATTGCGCAATATGCCGTAGGTGCAGCAGTGAAATATAAATTATTACCAAGTGTAATCCTTTCTCAATACGGTTACGAATCAGCGTTTGGTACGTCGGCGTCCGCAAGAAATGATCTCAACTATTTTGGAATT…
GCF_020405785.1	NZ_JAIZFM0100000331.4394.AOI_01	86.2;Enterocin_L50a	VIYNYYEQKNDWRSYIMGAIAKLVAKFGWPIVKKYYKQIMQFIGEGWAINKIIEWIKKHI	GTGATATACAATTATTATGAACAAAAAAATGATTGGAGGAGTTATATTATGGGAGCAATCGCAAAATTAGTAGCAAAGTTTGGGTGGCCTATTGTTAAAAAGTATTACAAACAAATTATGCAGTTTATTGGAGAAGGATGGGCAATTAACAAAATCATTGAGTGGATTAAAAAACATATT
GCF_020405785.1	NZ_JAIZFM0100000331.4394.AOI_01	87.2;Enterocin_L50b	MGAIAKLVTKFGWPLIKKFYKQIMQFIGQGWTIDQIEKWLKRH	ATGGGAGCAATCGCAAAACTAGTGACAAAGTTTGGGTGGCCACTAATCAAAAAATTCTACAAACAAATCATGCAATTTATTGGACAAGGATGGACAATAGATCAAATTGAAAAATGGCTAAAAAGACAT
GCF_020405785.1	NZ_JAIZFM0100000411.4385.AOI_01	91.2;Enterocin_P	MRKKLFSLALIGIFGLVVTNFGTKVDAATRSYGNGVYCNNSKCWVNWGEAKENIAGIVISGWASGLAGMGH	ATGAGAAAAAAATTATTTAGTTTAGCTCTTATTGGAATATTTGGGTTAGTTGTGACAAATTTTGGTACAAAAGTTGATGCAGCTACGCGTTCATATGGTAATGGTGTTTATTGTAATAATAGTAAATGCTGGGTTAACTGGGGAGAAGCTAAAGAGAATATTGCAGGAATCGTTATTAGTGGCTGGGCTTCTGGTTTGGCAGGTATGGGACAT
GCF_020405775.1	NZ_JAIZFN0100000211.4353.AOI_01	95.2;Enterocin_SE-K4	LILGIVLLSVSTLGITVDAATYYGNGVYCNTQKCWVDWSRARSEIVDRGVKAYVNGFTKVLGGVGGR	TTGATTTTAGGAATTGTTTTATTGAGTGTATCTACTTTAGGAATTACAGTAGATGCTGCAACTTATTATGGAAATGGTGTTTATTGTAATACTCAAAAATGTTGGGTAGATTGGAGTAGAGCTCGCTCTGAGATTGTTGATAGAGGAGTAAAAGCTTACGTTAATGGTTTTACGAAAGTGCTAGGTGGAGTCGGTGGAAGA
GCF_020405775.1	NZ_JAIZFN0100000211.4353.AOI_02	63.3;Enterolysin_A	MENQDESLIKQYVKRRAKRRLFLWLFGTSAGLITILITVFVTLFLILAAGSIDNSDSDSSSGGETFTGEYSEGLPIYKEIKGRGPFSDEIAQYAVGAAVKYKLLPSVILSQYGYESAFGTSASARNDLNYFGITWFDGCLFPKGTARGIGGIEGGWYMKFPNSKAAFSYYGFMVATQSNFNACVGNKSPGASLLILGRGGYAAAGITEDSPYYTGCMSIITSNKLTEYDEFAIKHWGEGGNNNGTITGEWTNPFPGSSLDKSSFSGGQLFGTNPGGEFRPNGFHDGLDFGSVDHPGSEIHAVHVGKVVYVGNPGISGLGACVIVINYDGLNMVYQEFANSTGNSCVKVGDQVKVGQVIGIRDTAHLHLGFTRMDWRQAQGHAFTGDGTWIDPLPFLNSS…	ATGGAAAATCAAGATGAAAGTTTAATCAAGCAGTATGTTAAGCGTCGCGCAAAGCGGCGCTTATTTTTGTGGTTGTTTGGTACTTCTGCAGGTTTGATTACCATTTTGATCACTGTATTCGTGACCCTATTTTTAATACTTGCGGCTGGTTCGATTGATAATTCGGATTCAGATTCAAGCAGTGGTGGCGAAACTTTTACAGGAGAGTATTCGGAAGGATTGCCCATTTATAAAGAAATCAAAGGAAGAGGCCCTTTTTCTGATGAGATTGCGCAATATGCCGTAGGTGCAGCAGTGAAATATAAATTATTACCAAGTGTAATCCTTTCTCAATACGGTTACGAATCAGCGTTTGGTACGTCGGCGTCCGCAAGAAATGATCTCAACTATTTTGGAATT…
GCF_020405775.1	NZ_JAIZFN0100000331.4330.AOI_01	87.2;Enterocin_L50b	MGAIAKLVTKFGWPLIKKFYKQIMQFIGQGWTIDQIEKWLKRH	ATGGGAGCAATCGCAAAACTAGTGACAAAGTTTGGGTGGCCACTAATCAAAAAATTCTACAAACAAATCATGCAATTTATTGGACAAGGATGGACAATAGATCAAATTGAAAAATGGCTAAAAAGACAT
GCF_020405775.1	NZ_JAIZFN0100000331.4330.AOI_01	86.2;Enterocin_L50a	VIYNYYEQKNDWRSYIMGAIAKLVAKFGWPIVKKYYKQIMQFIGEGWAINKIIEWIKKHI	GTGATATACAATTATTATGAACAAAAAAATGATTGGAGGAGTTATATTATGGGAGCAATCGCAAAATTAGTAGCAAAGTTTGGGTGGCCTATTGTTAAAAAGTATTACAAACAAATTATGCAGTTTATTGGAGAAGGATGGGCAATTAACAAAATCATTGAGTGGATTAAAAAACATATT
GCF_020405775.1	NZ_JAIZFN0100000361.4349.AOI_01	91.2;Enterocin_P	MRKKLFSLALIGIFGLVVTNFGTKVDAATRSYGNGVYCNNSKCWVNWGEAKENIAGIVISGWASGLAGMGH	ATGAGAAAAAAATTATTTAGTTTAGCTCTTATTGGAATATTTGGGTTAGTTGTGACAAATTTTGGTACAAAAGTTGATGCAGCTACGCGTTCATATGGTAATGGTGTTTATTGTAATAATAGTAAATGCTGGGTTAACTGGGGAGAAGCTAAAGAGAATATTGCAGGAATCGTTATTAGTGGCTGGGCTTCTGGTTTGGCAGGTATGGGACAT
GCF_020405965.1	NZ_JAIZFO0100000211.4549.AOI_01	95.2;Enterocin_SE-K4	LILGIVLLSVSTLGITVDAATYYGNGVYCNTQKCWVDWSRARSEIVDRGVKAYVNGFTKVLGGVGGR	TTGATTTTAGGAATTGTTTTATTGAGTGTATCTACTTTAGGAATTACAGTAGATGCTGCAACTTATTATGGAAATGGTGTTTATTGTAATACTCAAAAATGTTGGGTAGATTGGAGTAGAGCTCGCTCTGAGATTGTTGATAGAGGAGTAAAAGCTTACGTTAATGGTTTTACGAAAGTGCTAGGTGGAGTCGGTGGAAGA
GCF_020405965.1	NZ_JAIZFO0100000211.4549.AOI_02	63.3;Enterolysin_A	MENQDESLIKQYVKRRAKRRLFLWLFGTSAGLITILITVFVTLFLILAAGSIDNSDSDSSSGGETFTGEYSEGLPIYKEIKGRGPFSDEIAQYAVGAAVKYKLLPSVILSQYGYESAFGTSASARNDLNYFGITWFDGCLFPKGTARGIGGIEGGWYMKFPNSKAAFSYYGFMVATQSNFNACVGNKSPGASLLILGRGGYAAAGITEDSPYYTGCMSIITSNKLTEYDEFAIKHWGEGGNNNGTITGEWTNPFPGSSLDKSSFSGGQLFGTNPGGEFRPNGFHDGLDFGSVDHPGSEIHAVHVGKVVYVGNPGISGLGACVIVINYDGLNMVYQEFANSTGNSCVKVGDQVKVGQVIGIRDTAHLHLGFTRMDWRQAQGHAFTGDGTWIDPLPFLNSS…	ATGGAAAATCAAGATGAAAGTTTAATCAAGCAGTATGTTAAGCGTCGCGCAAAGCGGCGCTTATTTTTGTGGTTGTTTGGTACTTCTGCAGGTTTGATTACCATTTTGATCACTGTATTCGTGACCCTATTTTTAATACTTGCGGCTGGTTCGATTGATAATTCGGATTCAGATTCAAGCAGTGGTGGCGAAACTTTTACAGGAGAGTATTCGGAAGGATTGCCCATTTATAAAGAAATCAAAGGAAGAGGCCCTTTTTCTGATGAGATTGCGCAATATGCCGTAGGTGCAGCAGTGAAATATAAATTATTACCAAGTGTAATCCTTTCTCAATACGGTTACGAATCAGCGTTTGGTACGTCGGCGTCCGCAAGAAATGATCTCAACTATTTTGGAATT…
GCF_020405965.1	NZ_JAIZFO0100000331.4583.AOI_01	86.2;Enterocin_L50a	VIYNYYEQKNDWRSYIMGAIAKLVAKFGWPIVKKYYKQIMQFIGEGWAINKIIEWIKKHI	GTGATATACAATTATTATGAACAAAAAAATGATTGGAGGAGTTATATTATGGGAGCAATCGCAAAATTAGTAGCAAAGTTTGGGTGGCCTATTGTTAAAAAGTATTACAAACAAATTATGCAGTTTATTGGAGAAGGATGGGCAATTAACAAAATCATTGAGTGGATTAAAAAACATATT
GCF_020405965.1	NZ_JAIZFO0100000331.4583.AOI_01	87.2;Enterocin_L50b	MGAIAKLVTKFGWPLIKKFYKQIMQFIGQGWTIDQIEKWLKRH	ATGGGAGCAATCGCAAAACTAGTGACAAAGTTTGGGTGGCCACTAATCAAAAAATTCTACAAACAAATCATGCAATTTATTGGACAAGGATGGACAATAGATCAAATTGAAAAATGGCTAAAAAGACAT
GCF_020405965.1	NZ_JAIZFO0100000411.4579.AOI_01	91.2;Enterocin_P	MRKKLFSLALIGIFGLVVTNFGTKVDAATRSYGNGVYCNNSKCWVNWGEAKENIAGIVISGWASGLAGMGH	ATGAGAAAAAAATTATTTAGTTTAGCTCTTATTGGAATATTTGGGTTAGTTGTGACAAATTTTGGTACAAAAGTTGATGCAGCTACGCGTTCATATGGTAATGGTGTTTATTGTAATAATAGTAAATGCTGGGTTAACTGGGGAGAAGCTAAAGAGAATATTGCAGGAATCGTTATTAGTGGCTGGGCTTCTGGTTTGGCAGGTATGGGACAT
GCF_020405935.1	NZ_JAIZFP0100000211.4522.AOI_01	95.2;Enterocin_SE-K4	LILGIVLLSVSTLGITVDAATYYGNGVYCNTQKCWVDWSRARSEIVDRGVKAYVNGFTKVLGGVGGR	TTGATTTTAGGAATTGTTTTATTGAGTGTATCTACTTTAGGAATTACAGTAGATGCTGCAACTTATTATGGAAATGGTGTTTATTGTAATACTCAAAAATGTTGGGTAGATTGGAGTAGAGCTCGCTCTGAGATTGTTGATAGAGGAGTAAAAGCTTACGTTAATGGTTTTACGAAAGTGCTAGGTGGAGTCGGTGGAAGA
GCF_020405935.1	NZ_JAIZFP0100000211.4522.AOI_02	63.3;Enterolysin_A	MENQDESLIKQYVKRRAKRRLFLWLFGTSAGLITILITVFVTLFLILAAGSIDNSDSDSSSGGETFTGEYSEGLPIYKEIKGRGPFSDEIAQYAVGAAVKYKLLPSVILSQYGYESAFGTSASARNDLNYFGITWFDGCLFPKGTARGIGGIEGGWYMKFPNSKAAFSYYGFMVATQSNFNACVGNKSPGASLLILGRGGYAAAGITEDSPYYTGCMSIITSNKLTEYDEFAIKHWGEGGNNNGTITGEWTNPFPGSSLDKSSFSGGQLFGTNPGGEFRPNGFHDGLDFGSVDHPGSEIHAVHVGKVVYVGNPGISGLGACVIVINYDGLNMVYQEFANSTGNSCVKVGDQVKVGQVIGIRDTAHLHLGFTRMDWRQAQGHAFTGDGTWIDPLPFLNSS…	ATGGAAAATCAAGATGAAAGTTTAATCAAGCAGTATGTTAAGCGTCGCGCAAAGCGGCGCTTATTTTTGTGGTTGTTTGGTACTTCTGCAGGTTTGATTACCATTTTGATCACTGTATTCGTGACCCTATTTTTAATACTTGCGGCTGGTTCGATTGATAATTCGGATTCAGATTCAAGCAGTGGTGGCGAAACTTTTACAGGAGAGTATTCGGAAGGATTGCCCATTTATAAAGAAATCAAAGGAAGAGGCCCTTTTTCTGATGAGATTGCGCAATATGCCGTAGGTGCAGCAGTGAAATATAAATTATTACCAAGTGTAATCCTTTCTCAATACGGTTACGAATCAGCGTTTGGTACGTCGGCGTCCGCAAGAAATGATCTCAACTATTTTGGAATT…
GCF_020405935.1	NZ_JAIZFP0100000331.4502.AOI_01	86.2;Enterocin_L50a	VIYNYYEQKNDWRSYIMGAIAKLVAKFGWPIVKKYYKQIMQFIGEGWAINKIIEWIKKHI	GTGATATACAATTATTATGAACAAAAAAATGATTGGAGGAGTTATATTATGGGAGCAATCGCAAAATTAGTAGCAAAGTTTGGGTGGCCTATTGTTAAAAAGTATTACAAACAAATTATGCAGTTTATTGGAGAAGGATGGGCAATTAACAAAATCATTGAGTGGATTAAAAAACATATT
GCF_020405935.1	NZ_JAIZFP0100000331.4502.AOI_01	87.2;Enterocin_L50b	MGAIAKLVTKFGWPLIKKFYKQIMQFIGQGWTIDQIEKWLKRH	ATGGGAGCAATCGCAAAACTAGTGACAAAGTTTGGGTGGCCACTAATCAAAAAATTCTACAAACAAATCATGCAATTTATTGGACAAGGATGGACAATAGATCAAATTGAAAAATGGCTAAAAAGACAT
GCF_020405935.1	NZ_JAIZFP0100000421.4519.AOI_01	91.2;Enterocin_P	MRKKLFSLALIGIFGLVVTNFGTKVDAATRSYGNGVYCNNSKCWVNWGEAKENIAGIVISGWASGLAGMGH	ATGAGAAAAAAATTATTTAGTTTAGCTCTTATTGGAATATTTGGGTTAGTTGTGACAAATTTTGGTACAAAAGTTGATGCAGCTACGCGTTCATATGGTAATGGTGTTTATTGTAATAATAGTAAATGCTGGGTTAACTGGGGAGAAGCTAAAGAGAATATTGCAGGAATCGTTATTAGTGGCTGGGCTTCTGGTTTGGCAGGTATGGGACAT
GCF_029600515.1	NZ_JAIZWO0100000181.12231.AOI_01	63.3;Enterolysin_A	MENQNESLIKQYVKRRAKRRLFLWLFGTSAGLITILITVFVTLFLILAAGSIDNSDSDSSSGGEAFTGEYSEGLPIYKEIKGRGPFSDEIAQYAVGAAVKYKLLPSVILSQYGYESAFGTSASARNDLNYFGITWFDGCLFPKGTARGIGGIEGGWYMKFPNSKAAFSYYGFMVATQSNFNACVGNKSPGASLLILGRGGYAAAGITEDSPYYTGCMSIITSNKLTEYDEFAIKHWGEGGNNNGTITGEWTNPFPGSSLDKSSFSGGQLFGTNPGGEFRPNGFHDGLDFGSVDHPGSEIHAVHGGKVVYVGNPGISGLGACVIVINYDGLNMVYQEFANSTGNSRVKVGDQVKVGQVIGIRDTAHLHLGFTRMDWRQAQGHAFTDDGTWIDPLPFLNSS…	ATGGAAAACCAAAATGAAAGTTTAATCAAGCAGTATGTTAAGCGTCGTGCAAAGCGACGCTTATTTTTGTGGTTGTTTGGTACTTCTGCAGGTTTGATTACTATTTTGATTACTGTGTTCGTGACCCTTTTTCTAATACTTGCGGCGGGTTCGATTGATAATTCTGATTCAGATTCAAGTAGTGGTGGCGAAGCTTTTACAGGAGAATATTCGGAAGGATTACCCATTTATAAAGAAATCAAAGGAAGAGGCCCTTTTTCTGATGAGATTGCGCAATATGCCGTAGGTGCAGCAGTGAAATATAAATTATTACCAAGTGTAATCCTTTCTCAATACGGTTACGAATCAGCGTTTGGTACGTCGGCGTCCGCAAGAAATGATCTCAACTATTTTGGGATT…
GCF_029600455.1	NZ_JAIZWP0100000731.12022.AOI_01	63.3;Enterolysin_A	MENQDESLIKQYVKRRAKRRLFLWLFGTSAGLITILITVFVTLFLILAAGSIDNSDSDSSSGGETFTGEYSEGLPIYKEIKGRGPFSDEIAQYAVGAAVKYKLLPSVILSQYGYESAFGTSASARNDLNYFGITWFDGCLFPKGTARGIGGIEGGWYMKFPNSKAAFSYYGFMVATQSNFNACVGNKSPGASLLILGRGGYAAAGITGDSPYYTGCMSIITSNKLTEYDEFAIKHWGEGGNNNGTITGEWTNPFPGSSLDKSSFSGGQLFGTNPGGEFRPNGFHDGLDFGSVDHPGSEIHAVHVGKVVYVGNPGISGLGACVIVINYDGLNMVYQEFANSTGNSCVKVGDQVKVGQVIGIRDTAHLHLGFTRMDWRQAQGHAFTGDGTWIDPLPFLNSS…	ATGGAAAATCAAGATGAAAGTTTAATCAAGCAGTATGTTAAGCGTCGCGCAAAGCGGCGCTTATTTTTGTGGTTGTTTGGTACTTCTGCAGGTTTGATTACCATTTTGATCACTGTATTCGTGACCCTATTTTTAATACTTGCGGCTGGTTCGATTGATAATTCGGATTCAGATTCAAGCAGTGGTGGCGAAACTTTTACAGGAGAGTATTCGGAAGGATTGCCCATTTATAAAGAAATCAAAGGAAGAGGCCCTTTTTCTGATGAGATTGCGCAATATGCCGTAGGTGCAGCAGTGAAATATAAATTATTACCAAGTGTAATCCTTTCTCAATACGGTTACGAATCAGCGTTTGGTACGTCGGCGTCCGCAAGAAATGATCTCAACTATTTTGGAATT…
GCF_029600495.1	NZ_JAIZWQ0100000151.12153.AOI_01	63.3;Enterolysin_A	MENQDESLIKQYVKRRAKRRLFLWLFGTSAGLITILITVFVTLFLILAAGSIDNSDSDSSSGGETFTGEYSEGLPIYKEIKGRGPFSDEIAQYAVGAAVKYKLLPSVILSQYGYESAFGTSASARNDLNYFGITWFDGCLFPKGTARGIGGIEGGWYMKFPNSKAAFSYYGFMVATQSNFNACVGNKSPGASLLILGRGGYAAAGITEDSPYYTGCMSIITSNKLTEYDEFAIKHWGEGGNNNGTITGEWTNPFPGSSLDKSSFSGGQLFGTNPGGEFRPNGFHDGLDFGSVDHPGSEIHAVHVGKVVYVGNPGISGLGACVIVINYDGLNMVYQEFANSTGNSRVKVGDQVKVGQVIGIRDTAHLHLGFTRMDWRQAQGHAFTDDGTWIDPLPFLNSS…	ATGGAAAATCAAGATGAAAGTTTAATCAAGCAGTATGTTAAGCGTCGCGCAAAGCGGCGCTTATTTTTGTGGTTGTTTGGTACTTCTGCAGGTTTGATTACCATTTTGATCACTGTATTCGTGACCCTATTTTTAATACTTGCGGCTGGTTCGATTGATAATTCGGATTCAGATTCAAGCAGTGGTGGCGAAACTTTTACAGGAGAGTATTCGGAAGGATTGCCCATTTATAAAGAAATCAAAGGAAGAGGCCCTTTTTCTGATGAGATTGCGCAATATGCCGTAGGTGCAGCAGTGAAATATAAATTATTACCAAGTGTAATCCTTTCTCAATACGGTTACGAATCAGCGTTTGGTACGTCGGCGTCCGCAAGAAATGATCTCAACTATTTTGGAATT…
GCF_029600495.1	NZ_JAIZWQ0100000371.12137.AOI_01	87.2;Enterocin_L50b	MGAIAKLVTKFGWPLIKKFYKQIMQFIGQGWTIDQIEKWLKRH	ATGGGAGCAATCGCAAAACTAGTGACAAAGTTTGGGTGGCCACTAATCAAAAAATTCTACAAACAAATCATGCAATTTATTGGACAAGGATGGACAATAGATCAAATTGAAAAATGGCTAAAAAGACAT
GCF_029600495.1	NZ_JAIZWQ0100000371.12137.AOI_01	86.2;Enterocin_L50a	VIYNYYEQKNDWRSYIMGAIAKLVAKFGWPIVKKYYKQIMQFIGEGWAINKIIEWIKKHI	GTGATATACAATTATTATGAACAAAAAAATGATTGGAGGAGTTATATTATGGGAGCAATCGCAAAATTAGTAGCAAAGTTTGGGTGGCCTATTGTTAAAAAGTATTACAAACAAATTATGCAGTTTATTGGAGAAGGATGGGCAATTAACAAAATCATTGAGTGGATTAAAAAACATATT
GCF_029600495.1	NZ_JAIZWQ0100000551.12123.AOI_01	225.2;UviB	MEKLLESLLSNPEQISFAVLFVGLFIWVMKQNNEREERYQNTIDKLTNALGDVEDIKSTVEKIHEKLK	ATGGAAAAATTATTGGAGTCGTTGCTTTCAAACCCTGAACAAATAAGTTTTGCAGTATTGTTTGTTGGTTTGTTTATTTGGGTAATGAAACAGAATAATGAGAGAGAAGAAAGATATCAAAACACGATTGACAAGTTAACAAATGCTTTAGGAGATGTGGAAGATATCAAAAGCACTGTGGAAAAAATCCACGAAAAATTAAAA
GCF_029600465.1	NZ_JAIZWR0100000161.12035.AOI_01	63.3;Enterolysin_A	MENQNESLIKQYVKRRAKRRLFLWLFGTSAGLITILITVFVTLFLILAAGSIDNSDSDSSSGGEAFTGEYSEGLPIYKEIKGRGPFSDEIAQYAVGAAVKYKLLPSVILSQYGYESAFGTSASARNDLNYFGITWFDGCLFPKGTARGIGGIEGGWYMKFPNSKAAFSYYGFMVATQSNFNACVGNKSPGASLLILGRGGYAAAGITEDSPYYTGCMSIITSNKLTEYDEFAIKHWGEGGNNNGTITGEWTNPFPGSSLDKSSFSGGQLFGTNPGGEFRPNGFHDGLDFGSVDHPGSEIHAVHGGKVVYVGNPGISGLGACVIVINYDGLNMVYQEFANSTGNSRVKVGDQVKVGQVIGIRDTAHLHLGFTRMDWRQAQGHAFTDDGTWIDPLPFLNSS…	ATGGAAAACCAAAATGAAAGTTTAATCAAGCAGTATGTTAAGCGTCGTGCAAAGCGACGCTTATTTTTGTGGTTGTTTGGTACTTCTGCAGGTTTGATTACTATTTTGATTACTGTGTTCGTGACCCTTTTTCTAATACTTGCGGCGGGTTCGATTGATAATTCTGATTCAGATTCAAGTAGTGGTGGCGAAGCTTTTACAGGAGAATATTCGGAAGGATTACCCATTTATAAAGAAATCAAAGGAAGAGGCCCTTTTTCTGATGAGATTGCGCAATATGCCGTAGGTGCAGCAGTGAAATATAAATTATTACCAAGTGTAATCCTTTCTCAATACGGTTACGAATCAGCGTTTGGTACGTCGGCGTCCGCAAGAAATGATCTCAACTATTTTGGGATT…
GCF_029600525.1	NZ_JAIZWS0100000171.12270.AOI_01	95.2;Enterocin_SE-K4	LILGIVLLSVSTLGITVDAATYYGNGAYCNTQKCWVDWSRARSEIVDRGVKAYVNGFTKVLGGVGGR	TTGATTTTAGGAATTGTTTTATTGAGTGTATCTACTTTAGGAATTACAGTAGATGCTGCAACTTATTATGGAAATGGTGCTTATTGTAATACTCAAAAATGTTGGGTAGATTGGAGTAGAGCTCGCTCTGAGATTGTTGATAGAGGAGTAAAAGCTTACGTTAATGGTTTTACGAAAGTGCTAGGTGGAGTCGGTGGAAGA
GCF_029600525.1	NZ_JAIZWS0100000171.12270.AOI_02	63.3;Enterolysin_A	MENQDESLIKQYVKRRAKRRLFLWLFGTSAGLITILITVFVTLFLILAAGSIDNSDSDSSSGGETFTGEYSEGLPIYKEIKGRGPFSDEIAQYAVGAAVKYKLLPSVILSQYGYESAFGTSASARNDLNYFGITWFDGCLFPKGTARGIGGIEGGWYMKFPNSKAAFSYYGFMVATQSNFNACVGNKSPGASLLILGRGGYAAAGITGDSPYYTGCMSIITSNKLTEYDEFAIKHWGEGGNNNGTITGEWTNPFPGSSLDKSSFSGGQLFGTNPGGEFRPNGFHDGLDFGSVDHPGSEIHAVHVGKVVYVGNPGISGLGACVIVINYDGLNMVYQEFANSTGNSCVKVGDQVKVGQVIGIRDTAHLHLGFTRMDWRQAQGHAFTGDGTWIDPLPFLNSS…	ATGGAAAATCAAGATGAAAGTTTAATCAAGCAGTATGTTAAGCGTCGCGCAAAGCGGCGCTTATTTTTGTGGTTGTTTGGTACTTCTGCAGGTTTGATTACCATTTTGATCACTGTATTCGTGACCCTATTTTTAATACTTGCGGCTGGTTCGATTGATAATTCGGATTCAGATTCAAGCAGTGGTGGCGAAACTTTTACAGGAGAGTATTCGGAAGGATTGCCCATTTATAAAGAAATCAAAGGAAGAGGCCCTTTTTCTGATGAGATTGCGCAATATGCCGTAGGTGCAGCAGTGAAATATAAATTATTACCAAGTGTAATCCTTTCTCAATACGGTTACGAATCAGCGTTTGGTACGTCGGCGTCCGCAAGAAATGATCTCAACTATTTTGGAATT…
GCF_029600375.1	NZ_JAIZWT0100000211.11652.AOI_01	95.2;Enterocin_SE-K4	LILGIVLLSVSTLGITVDAATYYGNGVYCNTQKCWVDWSRARSEIVDRGVKAYVNGFTKVLGGVGGR	TTGATTTTAGGAATTGTTTTATTGAGTGTATCTACTTTAGGAATTACAGTAGATGCTGCAACTTATTATGGAAATGGTGTTTATTGTAATACTCAAAAATGTTGGGTAGATTGGAGTAGAGCTCGCTCTGAGATTGTTGATAGAGGAGTAAAAGCTTACGTTAATGGTTTTACGAAAGTGCTAGGTGGAGTCGGTGGAAGA
GCF_029600375.1	NZ_JAIZWT0100000211.11652.AOI_02	63.3;Enterolysin_A	MENQNESLIKQYVKRRAKRRLFLWLFGTSAGLITILITVFVTLFLILAAGSIDNSDSDSSSGGETFTGEYSEGLPIYKEIKGRGPFSDEIAQYAVGAAVKYKLLPSVILSQYGYESAFGTSASARNDLNYFGITWFDGCLFPKGTARGIGGIEGGWYMKFPNSKAAFSYYGFMVATQSNFNACVGNKSPGASLLILGRGGYAAAGITEDSPYYTGCMSIITSNKLTEYDEFAIKHWGEGGNNNGTITGEWTNPFPGSSLDKSSFSGGQLFGTNPGGEFRPNGFHDGLDFGSVDHQGSEIHAVHGGKVVYVGNPGISGLGACVIVINYDGLNMVYQEFANSTGNSRVKVGDQVKVGQVIGIRDTAHLHLGFTRMDWRQAQGHAFTGDGTWIDPLPFLNSS…	ATGGAAAACCAAAATGAAAGTTTAATCAAGCAGTATGTTAAGCGTCGTGCAAAGCGACGCTTATTTTTGTGGTTGTTTGGTACTTCTGCAGGTTTGATTACCATTTTGATCACTGTATTCGTGACCCTATTTTTAATACTTGCGGCTGGTTCGATTGATAATTCTGATTCAGATTCAAGCAGTGGTGGCGAAACTTTTACAGGAGAGTATTCGGAAGGATTGCCCATTTATAAAGAAATCAAAGGAAGAGGCCCTTTTTCTGATGAGATTGCGCAATATGCCGTAGGTGCAGCAGTGAAGTATAAATTATTACCAAGTGTGATCCTTTCGCAATACGGGTATGAATCAGCGTTTGGTACGTCGGCGTCTGCAAGAAATGATCTCAATTATTTTGGGATT…
GCF_029600435.1	NZ_JAIZWU0100000221.11933.AOI_01	63.3;Enterolysin_A	MENQNESLIKQYVKRRAKRRLFLWLFGTSAGLITILITVFVTLFLILAAGSIDNSDSDSSSGGETFTGEYSEGLPIYKEIKGRGPFSDEIAQYAVGAAVKYKLLPSVILSQYGYESAFGTSASARNDLNYFGITWFDGCLFPKGTARGIGGIEGGWYMKFPNSKAAFSYYGFMVATQSNFNACVGNKSPGASLLILGRGGYAASGITEDSPYYTGCMSIITSNKLTEYDEFAIKHWGEGGNNNGTITGEWTNPFPGSSLDKSSFSGGQLFGTNPGGEFRPNGFHDGLDFGSVDHPGSEIHAVHVGKVVYVGNPGISGLGACVIVINYDGLNMVYQEFANSTGNSCVKVGDQVKVGQVIGIRDTAHLHLGFTRMDWRQAQGHAFTGDGTWIDPLPFLNSS…	ATGGAAAACCAAAATGAAAGTTTAATCAAGCAGTATGTTAAGCGTCGTGCAAAGCGACGCTTATTTTTGTGGTTGTTTGGTACTTCTGCAGGTTTGATTACCATTTTGATCACTGTATTCGTGACCCTATTTTTAATACTTGCGGCTGGTTCGATTGATAATTCGGATTCAGATTCAAGCAGTGGTGGCGAAACTTTTACAGGAGAGTATTCGGAAGGATTGCCCATTTATAAAGAAATCAAAGGAAGAGGCCCTTTTTCTGATGAGATTGCGCAATATGCCGTAGGTGCAGCAGTGAAATATAAATTATTACCAAGTGTAATCCTTTCTCAATACGGTTACGAATCAGCGTTTGGTACGTCGGCGTCCGCAAGAAATGATCTCAACTATTTTGGAATT…
GCF_029600435.1	NZ_JAIZWU0100000581.11904.AOI_01	51.2;Carnocin_CP52	MDKQQELLNLLSKAYNDPKINEYEGLKDKLFECASRLTNNEVNIGEVCYKLSTIISKYLVTHNFKTTESIIELQNFVTKESQKYRGWASIGIWS	ATGGACAAGCAACAAGAATTACTGAATTTACTTAGTAAAGCGTATAATGATCCTAAAATAAATGAATACGAAGGGTTAAAAGATAAGTTATTTGAATGTGCAAGCAGATTAACAAATAACGAAGTAAATATCGGTGAAGTTTGTTATAAATTAAGTACAATTATCAGTAAATATCTAGTAACACATAATTTTAAAACAACTGAATCAATTATTGAATTGCAAAATTTTGTGACTAAAGAGAGCCAAAAATATAGGGGATGGGCGTCTATCGGTATTTGGAGT
GCF_029600435.1	NZ_JAIZWU0100000581.11904.AOI_01	16.2;Bacteriocin_31	MKKKFVSIFMILGIVLLSVSTLGITVDAATYYGNGVYCNKQECWVDWNKASKEIGKIIVNGWVQHGPWAPR	ATGAAGAAAAAATTTGTTAGTATTTTTATGATTTTAGGAATTGTTTTATTGAGTGTATCTACTTTAGGAATTACAGTAGATGCTGCAACTTATTATGGAAATGGTGTTTATTGTAATAAACAAGAATGTTGGGTAGATTGGAATAAAGCTTCAAAAGAAATAGGAAAAATTATTGTTAATGGTTGGGTGCAACATGGACCTTGGGCTCCTAGA
GCF_029600395.1	NZ_JAIZWV0100000181.11808.AOI_01	95.2;Enterocin_SE-K4	LILGIVLLSVSTLGITVDAATYYGNGVYCNTQKCWVDWSRARSEIVDRGVKAYVNGFTKVLGGVGGR	TTGATTTTAGGAATTGTTTTATTGAGTGTATCTACTTTAGGAATTACAGTAGATGCTGCAACTTATTATGGAAATGGTGTTTATTGTAATACTCAAAAATGTTGGGTAGATTGGAGTAGAGCTCGCTCTGAGATTGTTGATAGAGGAGTAAAAGCTTACGTTAATGGTTTTACGAAAGTGCTAGGTGGAGTCGGTGGAAGA
GCF_029600395.1	NZ_JAIZWV0100000181.11808.AOI_02	63.3;Enterolysin_A	MENQNESLIKQYVKRRAKRRLFLWLFGTSAGLITILITVFVTLFLILAAGSIDNSDSDSSSGGEAFTGEYSEGLPIYKEIKGRGPFSDEIAQYAVGAAVKYKLLPSVILSQYGYESAFGTSASARNDLNYFGITWFDGCLFPKGTARGIGGIEGGWYMKFPNSKAAFSYYGFMVATQSNFNACVGNKSPGASLLILGRGGYAAAGITEDSPYYTGCMSIITSNKLTEYDEFAIKHWSEGGNNNGTITGEWTNPFPGSSLDKSSFSGGQLFGTNPGGEFRPNGFHDGLDFGSVDHPGSEIHAVHGGKVVYVGNPGISGLGACVIVINYDGLNMVYQEFANSTGNSRVKVGDQVKVGQVIGIRDTAHLHLGFTRMDWRQAQGHAFTDDGTWIDPLPFLNSS…	ATGGAAAACCAAAATGAAAGTTTAATCAAGCAGTATGTTAAGCGTCGTGCAAAGCGACGCTTATTTTTGTGGTTGTTTGGTACTTCTGCAGGTTTGATTACTATTTTGATCACTGTGTTCGTGACCCTTTTTCTAATACTGGCGGCGGGTTCGATTGATAATTCTGATTCAGATTCAAGCAGTGGTGGCGAAGCTTTTACAGGAGAATATTCGGAAGGATTACCCATTTATAAAGAAATCAAAGGAAGAGGCCCTTTTTCTGATGAGATTGCGCAATATGCTGTAGGTGCAGCAGTGAAATATAAATTATTACCAAGTGTGATCCTTTCGCAATACGGTTACGAATCAGCGTTTGGTACGTCGGCGTCCGCAAGAAATGATCTCAACTATTTTGGGATT…
GCF_029600395.1	NZ_JAIZWV0100000631.11802.AOI_01	225.2;UviB	MEKLLESLLSNPEQISFAVLFVGLFIWVMKQNNEREERYQNTIDKLTNALGDVEDIKSTVEKIHEKLK	ATGGAAAAATTATTGGAGTCGTTGCTTTCAAACCCTGAACAAATAAGTTTTGCAGTATTGTTTGTTGGTTTGTTTATTTGGGTAATGAAACAGAATAATGAGAGAGAAGAAAGATATCAAAACACGATTGACAAGTTAACAAATGCTTTAGGAGATGTGGAAGATATCAAAAGCACTGTGGAAAAAATCCACGAAAAATTAAAA
GCF_029600385.1	NZ_JAIZWW0100000271.11733.AOI_01	63.3;Enterolysin_A	MENQNESLIKQYVKRRAKRRLFLWLFGTSAGLITILITVFVTLFLILAAGSIDHSDSDSSSGGEAFTGEYSEGLPIYKEIKGRGQFSDEIAQYAVGAAVKYKLLPSVILSQYGYESAFGTSASARNDLNYFGITWFDGCLFPKGTARGIGGIEGGWYMKFPNSKAAFSYYGFMVATQSNFNACVGNKSPGESLLILGRGGYAAAGITEDSPYYTGCMSIITSNKLTEYDEFAMKHWGEGGNDNGTITGEWTNPFPGSSLDKSFFSGGQLFGTNPGGEFRPNGFHDGLDFGSVDHPGSEIHAVHGGKVVYVGNPGISGLGACVIVINYDGLNMVYQEFANSTGNSRVKVGDQVKVDQVIGIRDTAHLHLGFTRMDWRQAQGHAFTDDGTWIDPLPFLNSS…	ATGGAAAACCAAAATGAAAGTTTAATCAAGCAGTATGTTAAGCGTCGTGCAAAGCGACGCTTATTTTTGTGGTTGTTTGGTACTTCTGCAGGTTTGATTACTATTTTGATCACTGTGTTCGTGACCCTTTTTCTAATACTTGCGGCGGGTTCGATTGATCATTCTGATTCAGATTCAAGTAGTGGTGGCGAAGCTTTTACAGGAGAATATTCGGAAGGATTACCCATTTATAAAGAAATCAAAGGAAGAGGACAATTTTCAGATGAGATTGCGCAATATGCTGTAGGTGCAGCAGTGAAATATAAATTATTACCAAGTGTGATCCTTTCGCAATACGGTTACGAATCAGCGTTTGGTACGTCGGCGTCCGCAAGAAATGATCTCAACTATTTTGGGATT…
GCF_029600315.1	NZ_JAIZXA0100000271.11593.AOI_01	63.3;Enterolysin_A	MENQNESLIKQYVKRRAKRRLFLWLFGTSAGLITILITVFVTLFLILAAGSIDHSDSDSSSGGEAFTGEYSEGLPIYKEIKGRGQFSDEIAQYAVGAAVKYKLLPSVILSQYGYESAFGTSASARNDLNYFGITWFDGCLFPKGTARGIGGIEGGWYMKFPNSKAAFSYYGFMVATQSNFNACVGNKSPGESLLILGRGGYAAAGITEDSPYYTGCMSIITSNKLTEYDEFAMKHWGEGGNDNGTITGEWTNPFPGSSLDKSFFSGGQLFGTNPGGEFRPNGFHDGLDFGSVDHPGSEIHAVHGGKVVYVGNPGISGLGACVIVINYDGLNMVYQEFANSTGNSRVKVGDQVKVDQVIGIRDTAHLHLGFTRMDWRQAQGHAFTDDGTWIDPLPFLNSS…	ATGGAAAACCAAAATGAAAGTTTAATCAAGCAGTATGTTAAGCGTCGTGCAAAGCGACGCTTATTTTTGTGGTTGTTTGGTACTTCTGCAGGTTTGATTACTATTTTGATCACTGTGTTCGTGACCCTTTTTCTAATACTTGCGGCGGGTTCGATTGATCATTCTGATTCAGATTCAAGTAGTGGTGGCGAAGCTTTTACAGGAGAATATTCGGAAGGATTACCCATTTATAAAGAAATCAAAGGAAGAGGACAATTTTCAGATGAGATTGCGCAATATGCTGTAGGTGCAGCAGTGAAATATAAATTATTACCAAGTGTGATCCTTTCGCAATACGGTTACGAATCAGCGTTTGGTACGTCGGCGTCCGCAAGAAATGATCTCAACTATTTTGGGATT…
GCF_029600255.1	NZ_JAIZXC0100000351.11514.AOI_01	87.2;Enterocin_L50b	MGAIAKLVTKFGWPLIKKFYKQIMQFIGQGWTIDQIEKWLKRH	ATGGGAGCAATCGCAAAACTAGTGACAAAGTTTGGGTGGCCACTAATCAAAAAATTCTACAAACAAATCATGCAATTTATTGGACAAGGATGGACAATAGATCAAATTGAAAAATGGCTAAAAAGACAT
GCF_029600255.1	NZ_JAIZXC0100000351.11514.AOI_01	86.2;Enterocin_L50a	VIYNYYEQKNDWRSYIMGAIAKLVAKFGWPIVKKYYKQIMQFIGEGWAINKIIEWIKKHI	GTGATATACAATTATTATGAACAAAAAAATGATTGGAGGAGTTATATTATGGGAGCAATCGCAAAATTAGTAGCAAAGTTTGGGTGGCCTATTGTTAAAAAGTATTACAAACAAATTATGCAGTTTATTGGAGAAGGATGGGCAATTAACAAAATCATTGAGTGGATTAAAAAACATATT
GCF_029600255.1	NZ_JAIZXC0100000361.11530.AOI_01	91.2;Enterocin_P	MRKKLFSLALIGIFGLVVTNFGTKVDAATRSYGNGVYCNNSKCWVNWGEAKENIAGIVISGWASGLAGMGH	ATGAGAAAAAAATTATTTAGTTTAGCTCTTATTGGAATATTTGGGTTAGTTGTGACAAATTTTGGTACAAAAGTTGATGCAGCTACGCGTTCATATGGTAATGGTGTTTATTGTAATAATAGTAAATGCTGGGTTAACTGGGGAGAAGCTAAAGAGAATATTGCAGGAATCGTTATTAGTGGCTGGGCTTCTGGTTTGGCAGGTATGGGACAT
GCF_029600255.1	NZ_JAIZXC0100000361.11530.AOI_01	95.2;Enterocin_SE-K4	LILGIVLLSVSTLGITVDAATYYGNGVYCNTQKCWVDWSRARSEIVDRGVKAYVNGFTKVLGGVGGR	TTGATTTTAGGAATTGTTTTATTGAGTGTATCTACTTTAGGAATTACAGTAGATGCTGCAACTTATTATGGAAATGGTGTTTATTGTAATACTCAAAAATGTTGGGTAGATTGGAGTAGAGCTCGCTCTGAGATTGTTGATAGAGGAGTAAAAGCTTACGTTAATGGTTTTACGAAAGTGCTAGGTGGAGTCGGTGGAAGA
GCF_029600235.1	NZ_JAIZXD0100000221.11473.AOI_01	63.3;Enterolysin_A	MENQNESLIKQYVKRHAKRRLFLWLFGTSAGLITILITVFVTLFLILAAGSIDNSDSDSSSGGEAFTGEYSEGLPIYKEIKGRGPFSDEIAQYAVGAAVKYKLLPSVILSQYGYESAFGTSASARNDLNYFGITWFDGCLFPKGTARGIGGIEGGWYMKFPNSKAAFSYYGFMVATQSNFNACVGNKSPGASLLILGRGGYAAAGITEDSPYYTGCMSIITSNKLTEYDEFAMKHWGEGGNDNGTITGEWTNPFPGSSLDKSSFSGGQLFGTNPGGEFRPNGFHDGLDFGSVDHPGSEIHAVHGGKVVYVGNPGISGLGACVIVINYDGLNMVYQEFANSTGNSRVKVGDQVKVGQVIGIRDTAHLHLGFARTDWRQAQGHAFTDDGTWIDPLPFLNSS…	ATGGAAAACCAAAATGAAAGTTTAATCAAGCAGTATGTTAAGCGTCATGCAAAGCGACGCTTATTTTTGTGGTTGTTTGGTACTTCTGCAGGTTTGATTACTATTTTGATTACTGTGTTCGTGACCCTTTTTCTAATACTTGCGGCGGGTTCGATTGATAATTCTGATTCAGATTCAAGTAGTGGTGGCGAAGCTTTTACAGGAGAATATTCGGAAGGATTACCCATTTATAAAGAAATCAAAGGAAGAGGCCCTTTTTCTGATGAGATTGCGCAATATGCTGTAGGTGCAGCAGTGAAATATAAATTATTACCAAGTGTGATTCTTTCGCAATACGGTTATGAATCAGCGTTTGGTACGTCGGCGTCCGCAAGAAATGATCTCAACTATTTTGGGATT…
GCF_029600235.1	NZ_JAIZXD0100000481.11489.AOI_01	87.2;Enterocin_L50b	MGAIAKLVTKFGWPLIKKFYKQIMQFIGQGWTIDQIEKWLKRH	ATGGGAGCAATCGCAAAACTAGTGACAAAGTTTGGGTGGCCACTAATCAAAAAATTCTACAAACAAATCATGCAATTTATTGGACAAGGATGGACAATAGATCAAATTGAAAAATGGCTAAAAAGACAT
GCF_029600235.1	NZ_JAIZXD0100000481.11489.AOI_01	86.2;Enterocin_L50a	MGAIAKLVAKFGWPIVKKYYKQIMQFIGEGWAINKIIEWIKKHI	ATGGGAGCAATCGCAAAATTAGTAGCAAAGTTTGGGTGGCCTATTGTTAAAAAGTATTACAAACAAATTATGCAGTTTATTGGAGAAGGATGGGCAATTAACAAAATCATTGAGTGGATTAAAAAACATATT
GCF_029600175.1	NZ_JAIZXE0100000201.11277.AOI_01	63.3;Enterolysin_A	MENQNESLIKQYVKRHAKRRLFLWLFGTSAGLITILITVFVTLFLILAAGSIDNSDSDSSSGGEAFTGEYSEGLPIYKEIKGRGPFSDEIAQYAVGAAVKYKLLPSVILSQYGYESAFGTSASARNDLNYFGITWFDGCLFPKGTARGIGGIEGGWYMKFPNSKAAFSYYGFMVATQSNFNACVGNKSPGASLLILGRGGYAAAGITEDSPYYTGCMSIITSNKLTEYDEFAMKHWGEGGNDNGTITGEWTNPFPGSSLDKSSFSGGQLFGTNPGGEFRPNGFHDGLDFGSVDHPGSEIHAVHGGKVVYVGNPGISGLGACVIVINYDGLNMVYQEFANSTGNSRVKVGDQVKVGQVIGIRDTAHLHLGFARTDWRQAQGHAFTDDGTWIDPLPFLNSS…	ATGGAAAACCAAAATGAAAGTTTAATCAAGCAGTATGTTAAGCGTCATGCAAAGCGACGCTTATTTTTGTGGTTGTTTGGTACTTCTGCAGGTTTGATTACTATTTTGATTACTGTGTTCGTGACCCTTTTTCTAATACTTGCGGCGGGTTCGATTGATAATTCTGATTCAGATTCAAGTAGTGGTGGCGAAGCTTTTACAGGAGAATATTCGGAAGGATTACCCATTTATAAAGAAATCAAAGGAAGAGGCCCTTTTTCTGATGAGATTGCGCAATATGCTGTAGGTGCAGCAGTGAAATATAAATTATTACCAAGTGTGATTCTTTCGCAATACGGTTATGAATCAGCGTTTGGTACGTCGGCGTCCGCAAGAAATGATCTCAACTATTTTGGGATT…
GCF_029600175.1	NZ_JAIZXE0100000461.11269.AOI_01	86.2;Enterocin_L50a	MGAIAKLVAKFGWPIVKKYYKQIMQFIGEGWAINKIIEWIKKHI	ATGGGAGCAATCGCAAAATTAGTAGCAAAGTTTGGGTGGCCTATTGTTAAAAAGTATTACAAACAAATTATGCAGTTTATTGGAGAAGGATGGGCAATTAACAAAATCATTGAGTGGATTAAAAAACATATT
GCF_029600175.1	NZ_JAIZXE0100000461.11269.AOI_01	87.2;Enterocin_L50b	MGAIAKLVTKFGWPLIKKFYKQIMQFIGQGWTIDQIEKWLKRH	ATGGGAGCAATCGCAAAACTAGTGACAAAGTTTGGGTGGCCACTAATCAAAAAATTCTACAAACAAATCATGCAATTTATTGGACAAGGATGGACAATAGATCAAATTGAAAAATGGCTAAAAAGACAT
GCF_029600195.1	NZ_JAIZXF0100000161.11336.AOI_01	63.3;Enterolysin_A	MENQDESLIKQYVKRRAKRRLFLWLFGTSAGLITILITVFVTLFLILAAGSIDNSDSDSSSGGETFTGEYSEGLPIYKEIKGRGPFSDEIAKYAVGAAVKYKLLPSVILSQYGYESAFGTSASARNDLNYFGITWFDGCLFPKGTARGIGGIEGGWYMKFPNSKAAFSYYGFMVATQSNFNACVGNKSPGASLLILGRGGYAAAGITGDSPYYTGCMSIITSNKLTEYDEFAIKHWGEGGNNNGTITGEWTNPFPGSSLDKSSFSGGQLFGTNPGGEFRPNGFHDGLDFGSVDHPGSEIHAVHVGKVVYVGNPGISGLGACVIVINYDGLNMVYQEFANSTGNSCVKVGDQVKVGQVIGIRDTAHLHLGFTRMDWRQAQGHAFTGDGTWIDPLPFLNSS…	ATGGAAAATCAAGATGAAAGTTTAATCAAGCAGTATGTTAAGCGTCGCGCAAAGCGGCGCTTATTTTTGTGGTTGTTTGGTACTTCTGCAGGTTTGATTACCATTTTGATCACTGTATTCGTGACCCTATTTTTAATACTTGCGGCTGGTTCGATTGATAATTCGGATTCAGATTCAAGCAGTGGTGGCGAAACTTTTACAGGAGAGTATTCGGAAGGATTGCCCATTTATAAAGAAATCAAAGGAAGAGGCCCTTTTTCTGATGAGATTGCGAAATATGCCGTAGGTGCAGCAGTGAAATATAAATTATTACCAAGTGTAATCCTTTCTCAATACGGTTACGAATCAGCGTTTGGTACGTCGGCGTCCGCAAGAAATGATCTCAACTATTTTGGAATT…
GCF_029600195.1	NZ_JAIZXF0100000461.11335.AOI_01	86.2;Enterocin_L50a	MNKKNDWRSYIMGAIAKLVAKFGWPIVKKYYKQIMQFIGEGWAINKIIEWIKKHI	ATGAACAAAAAAAATGATTGGAGGAGTTATATTATGGGAGCAATCGCAAAATTAGTAGCAAAGTTTGGGTGGCCTATTGTTAAAAAATATTACAAACAAATTATGCAGTTTATTGGAGAAGGATGGGCAATTAACAAAATCATTGAGTGGATTAAAAAACATATT
GCF_029600195.1	NZ_JAIZXF0100000461.11335.AOI_01	87.2;Enterocin_L50b	MGAIAKLVTKFGWPLIKKFYKQIMQFIGQGWTIDQIEKWLKRH	ATGGGAGCAATCGCAAAACTAGTGACAAAGTTTGGGTGGCCACTAATCAAAAAATTCTACAAACAAATCATGCAATTTATTGGACAAGGATGGACAATAGATCAAATTGAAAAATGGCTAAAAAGACAT
GCF_029600205.1	NZ_JAIZXG0100000541.11406.AOI_01	87.2;Enterocin_L50b	MGAIAKLVTKFGWPLIKKFYKQIMQFIGQGWTIDQIEKWLKRH	ATGGGAGCAATCGCAAAACTAGTGACAAAGTTTGGGTGGCCACTAATCAAAAAATTCTACAAACAAATCATGCAATTTATTGGACAAGGATGGACAATAGATCAAATTGAAAAATGGCTAAAAAGACAT
GCF_029600205.1	NZ_JAIZXG0100000541.11406.AOI_01	86.2;Enterocin_L50a	MLKFLLILKNFSSKRKKFNCGKLVFATIHLLCINIYFVKYFFCFCVIYNYYEQKNDWRSYIMGAIAKLVAKFGWPIVKKYYKQIMQFIGEGWAINKIIEWIKKHI	ATGTTAAAATTTTTACTTATTTTAAAAAATTTTTCTTCTAAGAGAAAAAAATTTAATTGTGGAAAGCTAGTATTTGCAACAATACATCTTCTATGCATAAATATATATTTTGTCAAATATTTTTTTTGTTTTTGTGTGATATACAATTATTATGAACAAAAAAATGATTGGAGGAGTTATATTATGGGAGCAATCGCAAAATTAGTAGCAAAGTTTGGGTGGCCTATTGTTAAAAAGTATTACAAACAAATTATGCAGTTTATTGGAGAAGGATGGGCAATTAACAAAATCATTGAGTGGATTAAAAAACATATT
GCF_029600155.1	NZ_JAIZXH0100000221.11200.AOI_01	63.3;Enterolysin_A	MENQNESLIKQYVKRRAKRRLFLWLFGTSAGLMTILITVFVTLFLILAAGSIDNSDSDSSSGGEAFTGEYSEGLPIYKEIKGRGPFSDEIAQYAVGAAVKYKLLPSVILSQYGYESAFGTSLSAKNDLNFFGITWFDGCLFPKGTARGIGGIEGGWYMKFPNSKAAFSYYGFMVATQSNFNASVGNKSPGASLLILGRGGYAAAGITEDSPYYTGCMSIITSNKLTEYDEFAIKHWGEGGNDNGTITGEWTNPFPGSSLDKSSFSGGQLFGTNPGGEFRPNGFHDGLDFGSVDHPGSEIHAVHGGKVVYVGNPGISGLGACVIVINYDGLNMVYQEFANSTGNSRVKVGDQVKVGQVIGIRDTAHLHLGFTRMDWRQAQGHAFTDDGTWIDPLPFLNSS…	ATGGAAAACCAAAATGAAAGTTTAATCAAGCAGTATGTTAAGCGTCGTGCAAAGCGACGCTTATTTTTGTGGTTGTTTGGTACTTCTGCAGGTTTGATGACTATTTTGATCACTGTGTTCGTGACCCTTTTTCTAATACTTGCGGCGGGTTCGATTGATAATTCGGATTCAGATTCAAGCAGTGGTGGCGAAGCTTTTACAGGAGAATATTCGGAAGGATTACCGATTTATAAAGAAATCAAAGGGAGAGGCCCATTTTCAGATGAAATTGCGCAATATGCGGTAGGAGCAGCCGTAAAATACAAATTATTGCCAAGTGTGATCCTATCGCAATACGGGTATGAATCGGCATTTGGAACGTCTCTATCTGCTAAAAACGACTTGAATTTTTTCGGAATT…
GCF_029600135.1	NZ_JAIZXI0100000201.11169.AOI_01	63.3;Enterolysin_A	METQNESLIKQYVKRRAKRRLFLWLFGTSAGLITILITVFVTLFLILAAGSIDNSDSDSSSGGEAFTGEYSEGLPIYKEIKGRGPFSDEIAQYAVGAAVKYKLLPSVILSQYGYESAFGTSASARNDLNYFGITWFDGCLFPKGTARGIGGIEGGWYMKFPNSKAAFSYYGFMVATQSNFNACVGNKSPGASLLILGRGGYAAAGITEDSPYYTGCMSIITSNKLTEYDEFAIKHWGEGNNNNGTITGEWTNPFPGSSLDKSSFGGGQLFGTNPGGEFRPNGFHDGLDFGSVDHPGSEIHAVHGGKVVYVGNPGISGLGACVIVINYDGLNMVYQEFANSTGNSRVKVGDQVKVGQVIGIRDTAHLHLGFTRMDWRQAQGHAFTDDGTWIDPLPFLNSS…	ATGGAAACCCAAAATGAAAGTTTAATCAAGCAGTATGTTAAGCGTCGTGCAAAGCGACGCTTATTTTTGTGGTTGTTTGGTACTTCTGCAGGTTTGATTACTATTTTGATTACTGTGTTCGTGACCCTTTTTCTAATACTTGCGGCGGGTTCGATTGATAATTCTGATTCAGATTCAAGTAGTGGTGGCGAAGCTTTTACAGGAGAATATTCGGAAGGATTACCCATTTATAAAGAAATCAAAGGAAGAGGCCCTTTTTCTGATGAGATTGCGCAATATGCTGTAGGTGCAGCAGTGAAATATAAATTATTACCAAGTGTGATTCTTTCGCAATACGGTTATGAATCAGCGTTTGGTACGTCGGCGTCCGCAAGAAATGATCTCAACTATTTTGGGATT…
GCF_029600135.1	NZ_JAIZXI0100000321.11173.AOI_01	91.2;Enterocin_P	MRKKLFSLALIGIFGLVVTNFGTKVDAATRSYGNGVYCNNSKCWVNWGEAKENIAGIVISGWASGLAGMGH	ATGAGAAAAAAATTATTTAGTTTAGCTCTTATTGGAATATTTGGGTTAGTTGTGACAAATTTTGGTACAAAAGTTGATGCAGCTACGCGTTCATATGGTAATGGTGTTTATTGTAATAATAGTAAATGCTGGGTTAACTGGGGAGAAGCTAAAGAGAATATTGCAGGAATCGTTATTAGTGGCTGGGCTTCTGGTTTGGCAGGTATGGGACAT
GCF_029600135.1	NZ_JAIZXI0100000341.11177.AOI_01	86.2;Enterocin_L50a	VIYNYYEQKNDWRSYIMGAIAKLVAKFGWPIVKKYYKQIMQFIGEGWAINKIIEWIKKHI	GTGATATACAATTATTATGAACAAAAAAATGATTGGAGGAGTTATATTATGGGAGCAATCGCAAAATTAGTAGCAAAGTTTGGGTGGCCTATTGTTAAAAAGTATTACAAACAAATTATGCAGTTTATTGGAGAAGGATGGGCAATTAACAAAATCATTGAGTGGATTAAAAAACATATT
GCF_029600135.1	NZ_JAIZXI0100000341.11177.AOI_01	87.2;Enterocin_L50b	MGAIAKLVTKFGWPLIKKFYKQIMQFIGQGWTIDQIEKWLKRH	ATGGGAGCAATCGCAAAACTAGTGACAAAGTTTGGGTGGCCACTAATCAAAAAATTCTACAAACAAATCATGCAATTTATTGGACAAGGATGGACAATAGATCAAATTGAAAAATGGCTAAAAAGACAT
GCF_029600115.1	NZ_JAIZXJ0100000191.11133.AOI_01	63.3;Enterolysin_A	MENQNESLIKQYVKRRAKRRLFLWLFGTSAGLITILITVFVTLFLILAAGSIDNSDSDSSSGGETFTGEYSEGLPIYKEIKGRGPFSDEIAQYAVGAAVKYKLLPSVILSQYGYESAFGTSASARNDLNYFGITWFDGCLFPKGTARGIGGIEGGWYMKFPNSKAAFSYYGFMVATQFNFNACVGNKSPGASLLILGRGGYAAAGITEDSPYYTGCMSIITSNKLTEYDEFAIKHWGEGGNNNGTITVEWTNPFPGSSLDKSSFSGGQLFGTNPGGEFRPNGFHDGLDLGSVDHQGSEIHAVHGGKVVYVGNPGISGLGACVIVINYDGLNMVYQEFANSTGNSRVKVGDQVKVGQVIGIRDTAHLHLGFTRMDWRQAQGHAFTGDGTWIDPLPFLNSS…	ATGGAAAACCAAAATGAAAGTTTAATCAAGCAGTATGTTAAGCGTCGTGCAAAGCGACGCTTATTTTTGTGGTTGTTTGGTACTTCTGCAGGTTTGATTACCATTTTGATCACTGTATTCGTGACCCTATTTTTAATACTTGCGGCTGGTTCGATTGATAATTCTGATTCAGATTCAAGCAGTGGTGGCGAAACTTTTACAGGAGAGTATTCGGAAGGATTGCCCATTTATAAAGAAATCAAAGGAAGAGGCCCTTTTTCTGATGAGATTGCGCAATATGCCGTAGGTGCAGCAGTGAAGTATAAATTATTACCAAGTGTGATCCTTTCGCAATACGGGTATGAATCAGCGTTTGGTACGTCGGCGTCTGCAAGAAATGATCTCAATTATTTTGGGATT…
GCF_029600075.1	NZ_JAIZXK0100000201.10986.AOI_01	95.2;Enterocin_SE-K4	LILGIVLLSVSTLGITVDAATYYGNSVYCNTQKCWVDWSRARSEIVDRGVKAYVNGFTKVLGGVGGR	TTGATTTTAGGAATTGTTTTATTGAGTGTATCTACTTTAGGAATTACAGTAGATGCTGCAACTTATTATGGAAATAGTGTTTATTGTAATACTCAAAAATGTTGGGTAGATTGGAGTAGAGCTCGCTCTGAGATTGTTGATAGAGGAGTAAAAGCTTACGTTAATGGTTTTACGAAAGTGCTAGGTGGAGTCGGTGGAAGA
GCF_029600075.1	NZ_JAIZXK0100000201.10986.AOI_02	63.3;Enterolysin_A	MENQDESLIKQYVKRRAKRRLFLWLFGTSAGLITILITVFVTLFLILAAGSIDNSDSDSSSGGETFTGEYSEGLPIYKEIKGRGPFSDEIAQYAVGAAVKYKLLPSVILSQYGYESAFGTSASARNDLNYFGITWFDGCLFPKGTARGIGGIEGGWYMKFPNSKAAFSYYGFMVATQSNFNACVGNKSPGASLLILGRGGYAAAGITEDSPYYTGCMSIITSNKLTEYDEFAIKHWGEGGNNNGTITGEWTNPFPGSSLDKSSFSGGQLFGTNPGGEFRPNGFHDGLDFGSVDHPGSEIHAVHVGKVVYVGNPGISGLGACVIVINYDGLNMVYQEFANSTGNSCVKVGDQVKVGQVIGIRDTAHLHLGFTRMDWRQAQGHAFTGDGTWIDPLPFLNSS…	ATGGAAAATCAAGATGAAAGTTTAATCAAGCAGTATGTTAAGCGTCGCGCAAAGCGGCGCTTATTTTTGTGGTTGTTTGGTACTTCTGCAGGTTTGATTACCATTTTGATCACTGTATTCGTGACCCTATTTTTAATACTTGCGGCTGGTTCGATTGATAATTCGGATTCAGATTCAAGCAGTGGTGGCGAAACTTTTACAGGAGAGTATTCGGAAGGATTGCCCATTTATAAAGAAATCAAAGGAAGAGGCCCTTTTTCTGATGAGATTGCGCAATATGCCGTAGGTGCAGCAGTGAAATATAAATTATTACCAAGTGTAATCCTTTCTCAATACGGTTACGAATCAGCGTTTGGTACGTCGGCGTCCGCAAGAAATGATCTCAACTATTTTGGAATT…
GCF_029600075.1	NZ_JAIZXK0100000421.10981.AOI_01	86.2;Enterocin_L50a	VIYNYYEQKNDWRSYIMGAIAKLVAKFGWPIVKKYYKQIMQFIGEGWAINKIIEWIKKHI	GTGATATACAATTATTATGAACAAAAAAATGATTGGAGGAGTTATATTATGGGAGCAATCGCAAAATTAGTAGCAAAGTTTGGGTGGCCTATTGTTAAAAAGTATTACAAACAAATTATGCAGTTTATTGGAGAAGGATGGGCAATTAACAAAATCATTGAGTGGATTAAAAAACATATT
GCF_029600075.1	NZ_JAIZXK0100000421.10981.AOI_01	87.2;Enterocin_L50b	MGAIAKLVTKFGWPLIKKFYKQIMQFIGQGWTIDQIEKWLKRH	ATGGGAGCAATCGCAAAACTAGTGACAAAGTTTGGGTGGCCACTAATCAAAAAATTCTACAAACAAATCATGCAATTTATTGGACAAGGATGGACAATAGATCAAATTGAAAAATGGCTAAAAAGACAT
GCF_029600075.1	NZ_JAIZXK0100000501.10988.AOI_01	91.2;Enterocin_P	MRKKLFSLALIGIFGLVVTNFGTKVDAATRSYGNGVYCNNSKCWVNWGEAKENIAGIVISGWASGLAGMGH	ATGAGAAAAAAATTATTTAGTTTAGCTCTTATTGGAATATTTGGGTTAGTTGTGACAAATTTTGGTACAAAAGTTGATGCAGCTACGCGTTCATATGGTAATGGTGTTTATTGTAATAATAGTAAATGCTGGGTTAACTGGGGAGAAGCTAAAGAGAATATTGCAGGAATCGTTATTAGTGGCTGGGCTTCTGGTTTGGCAGGTATGGGACAT
GCF_029600085.1	NZ_JAIZXL0100000191.11039.AOI_01	95.2;Enterocin_SE-K4	LILGIVLLSVSTLGITVDAATYYGNSVYCNTQKCWVDWSRARSEIVDRGVKAYVNGFTKVLGGVGGR	TTGATTTTAGGAATTGTTTTATTGAGTGTATCTACTTTAGGAATTACAGTAGATGCTGCAACTTATTATGGAAATAGTGTTTATTGTAATACTCAAAAATGTTGGGTAGATTGGAGTAGAGCTCGCTCTGAGATTGTTGATAGAGGAGTAAAAGCTTACGTTAATGGTTTTACGAAAGTGCTAGGTGGAGTCGGTGGAAGA
GCF_029600085.1	NZ_JAIZXL0100000191.11039.AOI_02	63.3;Enterolysin_A	MENQDESLIKQYVKRRAKRRLFLWLFGTSAGLITILITVFVTLFLILAAGSIDNSDSDSSSGGETFTGEYSEGLPIYKEIKGRGPFSDEIAQYAVGAAVKYKLLPSVILSQYGYESAFGTSASARNDLNYFGITWFDGCLFPKGTARGIGGIEGGWYMKFPNSKAAFSYYGFMVATQSNFNACVGNKSPGASLLILGRGGYAAAGITEDSPYYTGCMSIITSNKLTEYDEFAIKHWGEGGNNNGTITGEWTNPFPGSSLDKSSFSGGQLFGTNPGGEFRPNGFHDGLDFGSVDHPGSEIHAVHVGKVVYVGNPGISGLGACVIVINYDGLNMVYQEFANSTGNSCVKVGDQVKVGQVIGIRDTAHLHLGFTRMDWRQAQGHAFTGDGTWIDPLPFLNSS…	ATGGAAAATCAAGATGAAAGTTTAATCAAGCAGTATGTTAAGCGTCGCGCAAAGCGGCGCTTATTTTTGTGGTTGTTTGGTACTTCTGCAGGTTTGATTACCATTTTGATCACTGTATTCGTGACCCTATTTTTAATACTTGCGGCTGGTTCGATTGATAATTCGGATTCAGATTCAAGCAGTGGTGGCGAAACTTTTACAGGAGAGTATTCGGAAGGATTGCCCATTTATAAAGAAATCAAAGGAAGAGGCCCTTTTTCTGATGAGATTGCGCAATATGCCGTAGGTGCAGCAGTGAAATATAAATTATTACCAAGTGTAATCCTTTCTCAATACGGTTACGAATCAGCGTTTGGTACGTCGGCGTCCGCAAGAAATGATCTCAACTATTTTGGAATT…
GCF_029600085.1	NZ_JAIZXL0100000431.11025.AOI_01	86.2;Enterocin_L50a	VIYNYYEQKNDWRSYIMGAIAKLVAKFGWPIVKKYYKQIMQFIGEGWAINKIIEWIKKHI	GTGATATACAATTATTATGAACAAAAAAATGATTGGAGGAGTTATATTATGGGAGCAATCGCAAAATTAGTAGCAAAGTTTGGGTGGCCTATTGTTAAAAAGTATTACAAACAAATTATGCAGTTTATTGGAGAAGGATGGGCAATTAACAAAATCATTGAGTGGATTAAAAAACATATT
GCF_029600085.1	NZ_JAIZXL0100000431.11025.AOI_01	87.2;Enterocin_L50b	MGAIAKLVTKFGWPLIKKFYKQIMQFIGQGWTIDQIEKWLKRH	ATGGGAGCAATCGCAAAACTAGTGACAAAGTTTGGGTGGCCACTAATCAAAAAATTCTACAAACAAATCATGCAATTTATTGGACAAGGATGGACAATAGATCAAATTGAAAAATGGCTAAAAAGACAT
GCF_029600085.1	NZ_JAIZXL0100000531.11066.AOI_01	91.2;Enterocin_P	MRKKLFSLALIGIFGLVVTNFGTKVDAATRSYGNGVYCNNSKCWVNWGEAKENIAGIVISGWASGLAGMGH	ATGAGAAAAAAATTATTTAGTTTAGCTCTTATTGGAATATTTGGGTTAGTTGTGACAAATTTTGGTACAAAAGTTGATGCAGCTACGCGTTCATATGGTAATGGTGTTTATTGTAATAATAGTAAATGCTGGGTTAACTGGGGAGAAGCTAAAGAGAATATTGCAGGAATCGTTATTAGTGGCTGGGCTTCTGGTTTGGCAGGTATGGGACAT
GCF_029600055.1	NZ_JAIZXM0100000151.10943.AOI_01	63.3;Enterolysin_A	MENQNESLIKQYVKRRAKRRLFLWLFGTSAGLITILITVFVTLFLILAAGSIDNSDSDSSSGGETFTGEYSEGLPIYKEIKGRGPFSDEIAQYAVGAAVKYKLLPSVILSQYGYESAFGTSASARNDLNYFGITWFDGCLFPKGTARGIGGIEGGWYMKFPNSKAAFSYYGFMVATQSNFNACVGNKSPGASLLILGRGGYAAAGITEDSPYYTGCMSIITSNKLTEYDEFAIKHWGEGGNNNGTITGEWTNPFPGSSLDKSSFSGGQLFGTNPGGEFRPNGFHDGLDFGSVDHPGSEIHAVHVGKVVYVGNPGISGLGACVIVINYDGLNMVYQEFANSTGNSCVKIGDQVKVGQVIGIRDTAHLHLGFTRMDWRQAQGHAFTGDGTWIDPLPFLNSS…	ATGGAAAACCAAAATGAAAGTTTAATCAAGCAGTATGTTAAGCGTCGTGCAAAGCGACGCTTATTTTTGTGGTTGTTTGGTACTTCTGCAGGTTTGATTACCATTTTGATCACTGTATTCGTGACCCTATTTTTAATACTTGCGGCTGGTTCGATTGATAATTCGGATTCAGATTCAAGCAGTGGTGGCGAAACTTTTACAGGAGAGTATTCGGAAGGATTGCCCATTTATAAAGAAATCAAAGGAAGAGGCCCTTTTTCTGATGAGATTGCGCAATATGCCGTAGGTGCAGCAGTGAAATATAAATTATTACCAAGTGTAATCCTTTCTCAATACGGTTACGAATCAGCGTTTGGTACGTCGGCGTCCGCAAGAAATGATCTCAACTATTTTGGAATT…
GCF_029600055.1	NZ_JAIZXM0100000341.10940.AOI_01	86.2;Enterocin_L50a	MLKFLLILKNFSSKRKKFNCGKLVFATIHLLCINIYFVKYFFCFCVIYNYYEQKNDWRSYIMGAIAKLVAKFGWPIVKKYYKQIMQFIGEGWAINKIIEWIKKHI	ATGTTAAAATTTTTACTTATTTTAAAAAATTTTTCTTCTAAGAGAAAAAAATTTAATTGTGGAAAGCTAGTATTTGCAACAATACATCTTCTATGCATAAATATATATTTTGTCAAATATTTTTTTTGTTTTTGTGTGATATACAATTATTATGAACAAAAAAATGATTGGAGGAGTTATATTATGGGAGCAATCGCAAAATTAGTAGCAAAGTTTGGGTGGCCTATTGTTAAAAAGTATTACAAACAAATTATGCAGTTTATTGGAGAAGGATGGGCAATTAACAAAATCATTGAGTGGATTAAAAAACATATT
GCF_029600055.1	NZ_JAIZXM0100000341.10940.AOI_01	87.2;Enterocin_L50b	MGAIAKLVTKFGWPLIKKFYKQIMQFIGQGWTIDQIEKWLKRH	ATGGGAGCAATCGCAAAACTAGTGACAAAGTTTGGGTGGCCACTAATCAAAAAATTCTACAAACAAATCATGCAATTTATTGGACAAGGATGGACAATAGATCAAATTGAAAAATGGCTAAAAAGACAT
GCF_029600035.1	NZ_JAIZXN0100000401.10882.AOI_01	87.2;Enterocin_L50b	MGAIAKLVTKFGWPLIKKFYKQIMQFIGQGWTIDQIEKWLKRH	ATGGGAGCAATCGCAAAACTAGTGACAAAGTTTGGGTGGCCACTAATCAAAAAATTCTACAAACAAATCATGCAATTTATTGGACAAGGATGGACAATAGATCAAATTGAAAAATGGCTAAAAAGACAT
GCF_029600035.1	NZ_JAIZXN0100000401.10882.AOI_01	86.2;Enterocin_L50a	VIYNYYEQKNDWRSYIMGAIAKLVAKFGWPIVKKYYKQIMQFIGEGWAINKIIEWIKKHI	GTGATATACAATTATTATGAACAAAAAAATGATTGGAGGAGTTATATTATGGGAGCAATCGCAAAATTAGTAGCAAAGTTTGGGTGGCCTATTGTTAAAAAGTATTACAAACAAATTATGCAGTTTATTGGAGAAGGATGGGCAATTAACAAAATCATTGAGTGGATTAAAAAACATATT
GCF_029600035.1	NZ_JAIZXN0100000411.10896.AOI_01	95.2;Enterocin_SE-K4	LILGIVLLSVSTLGITVDAATYYGNGVYCNTQKCWVDWSRARSEIVDRGVKAYVNGFTKVLGGVGGR	TTGATTTTAGGAATTGTTTTATTGAGTGTATCTACTTTAGGAATTACAGTAGATGCTGCAACTTATTATGGAAATGGTGTTTATTGTAATACTCAAAAATGTTGGGTAGATTGGAGTAGAGCTCGCTCTGAGATTGTTGATAGAGGAGTAAAAGCTTACGTTAATGGTTTTACGAAAGTGCTAGGTGGAGTCGGTGGAAGA
GCF_029600035.1	NZ_JAIZXN0100000411.10896.AOI_01	91.2;Enterocin_P	MRKKLFSLALIGIFGLVVTNFGTKVDAATRSYGNGVYCNNSKCWVNWGEAKENIAGIVISGWASGLAGMGH	ATGAGAAAAAAATTATTTAGTTTAGCTCTTATTGGAATATTTGGGTTAGTTGTGACAAATTTTGGTACAAAAGTTGATGCAGCTACGCGTTCATATGGTAATGGTGTTTATTGTAATAATAGTAAATGCTGGGTTAACTGGGGAGAAGCTAAAGAGAATATTGCAGGAATCGTTATTAGTGGCTGGGCTTCTGGTTTGGCAGGTATGGGACAT
GCF_029600005.1	NZ_JAIZXO0100000241.10850.AOI_01	63.3;Enterolysin_A	MENQDESLIKQYVKRRAKRRLFLWLFGTSAGLITILITVFVTLFLILAAGSIDNSDSDSSSGGETFTGEYSEGLPIYKEIKGRGPFSDEIAQYAVGAAVKYKLLPSVILSQYGYESAFGTSASARNDLNYFGITWFDGCLFPKGTARGIGGIEGGWYMKFPNSKAAFSYYGFMVATQSNFNACVGNKSPGASLLILGRGGYAAAGITEDSPYYTGCMSIITSNKLTEYDEFAIKHWGEGGNNNGTITGEWTNPFPGSSLDKSSFSGGQLFGTNPGGEFRPNGFHDGLDFGSVDHPGSEIHAVHVGKVVYVGNPGISGLGACVIVINYDGLNMVYQEFANSTGNSCVKVGDQVKVGQVIGIRDTAHLHLGFTRMDWRQAQGHAFTGDGTWIDPLPFLNSS…	ATGGAAAATCAAGATGAAAGTTTAATCAAGCAGTATGTTAAGCGTCGCGCAAAGCGGCGCTTATTTTTGTGGTTGTTTGGTACTTCTGCAGGTTTGATTACCATTTTGATCACTGTATTCGTGACCCTATTTTTAATACTTGCGGCTGGTTCGATTGATAATTCGGATTCAGATTCAAGCAGTGGTGGCGAAACTTTTACAGGAGAGTATTCGGAAGGATTGCCCATTTATAAAGAAATCAAAGGAAGAGGCCCTTTTTCTGATGAGATTGCGCAATATGCCGTAGGTGCAGCAGTGAAATATAAATTATTACCAAGTGTAATCCTTTCTCAATACGGTTACGAATCAGCGTTTGGTACGTCGGCGTCCGCAAGAAATGATCTCAACTATTTTGGAATT…
GCF_029600005.1	NZ_JAIZXO0100000441.10825.AOI_01	86.2;Enterocin_L50a	VIYNYYEQKNDWRSYIMGAIAKLVAKFGWPIVKKYYKQIMQFIGEGWAINKIIEWIKKHI	GTGATATACAATTATTATGAACAAAAAAATGATTGGAGGAGTTATATTATGGGAGCAATCGCAAAATTAGTAGCAAAGTTTGGGTGGCCTATTGTTAAAAAGTATTACAAACAAATTATGCAGTTTATTGGAGAAGGATGGGCAATTAACAAAATCATTGAGTGGATTAAAAAACATATT
GCF_029600005.1	NZ_JAIZXO0100000441.10825.AOI_01	87.2;Enterocin_L50b	MGAIAKLVTKFGWPLIKKFYKQIMQFIGQGWTIDQIEKWLKRH	ATGGGAGCAATCGCAAAACTAGTGACAAAGTTTGGGTGGCCACTAATCAAAAAATTCTACAAACAAATCATGCAATTTATTGGACAAGGATGGACAATAGATCAAATTGAAAAATGGCTAAAAAGACAT
GCF_029600005.1	NZ_JAIZXO0100000531.10833.AOI_01	91.2;Enterocin_P	MRKKLFSLALIGIFGLVVTNFGTKVDAATRSYGNGVYCNNSKCWVNWGEAKENIAGIVISGWASGLAGMGH	ATGAGAAAAAAATTATTTAGTTTAGCTCTTATTGGAATATTTGGGTTAGTTGTGACAAATTTTGGTACAAAAGTTGATGCAGCTACGCGTTCATATGGTAATGGTGTTTATTGTAATAATAGTAAATGCTGGGTTAACTGGGGAGAAGCTAAAGAGAATATTGCAGGAATCGTTATTAGTGGCTGGGCTTCTGGTTTGGCAGGTATGGGACAT
GCF_029599955.1	NZ_JAIZXP0100000211.10673.AOI_01	95.2;Enterocin_SE-K4	LILGIVLLSVSTLGITVDAATYYGNGVYCNTQKCWVDWSRARSEIVDRGVKAYVNGFTKVLGGVGGR	TTGATTTTAGGAATTGTTTTATTGAGTGTATCTACTTTAGGAATTACAGTAGATGCTGCAACTTATTATGGAAATGGTGTTTATTGTAATACTCAAAAATGTTGGGTAGATTGGAGTAGAGCTCGCTCTGAGATTGTTGATAGAGGAGTAAAAGCTTACGTTAATGGTTTTACGAAAGTGCTAGGTGGAGTCGGTGGAAGA
GCF_029599955.1	NZ_JAIZXP0100000211.10673.AOI_02	63.3;Enterolysin_A	MENQDESLIKQYVKRRAKRRLFLWLFGTSAGLITILITVFVTLFLILAAGSIDNSDSDSSSGGETFTGEYSEGLPIYKEIKGRGPFSDEIAQYAVGAAVKYKLLPSVILSQYGYESAFGTSASARNDLNYFGITWFDGCLFPKGTARGIGGIEGGWYMKFPNSKAAFSYYGFMVATQSNFNACVGNKSPGASLLILGRGGYAAAGITEDSPYYTGCMSIITSNKLTEYDEFAIKHWGEGGNNNGTITGEWTNPFPGSSLDKSSFSGGQLFGTNPGGEFRPNGFHDGLDFGSVDHPGSEIHAVHVGKVVYVGNPGISGLGACVIVINYDGLNMVYQEFANSTGNSCVKVGDQVKVGQVIGIRDTAHLHLGFTRMDWRQAQGHAFTGDGTWIDPLPFLNSS…	ATGGAAAATCAAGATGAAAGTTTAATCAAGCAGTATGTTAAGCGTCGCGCAAAGCGGCGCTTATTTTTGTGGTTGTTTGGTACTTCTGCAGGTTTGATTACCATTTTGATCACTGTATTCGTGACCCTATTTTTAATACTTGCGGCTGGTTCGATTGATAATTCGGATTCAGATTCAAGCAGTGGTGGCGAAACTTTTACAGGAGAGTATTCGGAAGGATTGCCCATTTATAAAGAAATCAAAGGAAGAGGCCCTTTTTCTGATGAGATTGCGCAATATGCCGTAGGTGCAGCAGTGAAATATAAATTATTACCAAGTGTAATCCTTTCTCAATACGGTTACGAATCAGCGTTTGGTACGTCGGCGTCCGCAAGAAATGATCTCAACTATTTTGGAATT…
GCF_029599955.1	NZ_JAIZXP0100000441.10666.AOI_01	87.2;Enterocin_L50b	MGAIAKLVTKFGWPLIKKFYKQIMQFIGQGWTIDQIEKWLKRH	ATGGGAGCAATCGCAAAACTAGTGACAAAGTTTGGGTGGCCACTAATCAAAAAATTCTACAAACAAATCATGCAATTTATTGGACAAGGATGGACAATAGATCAAATTGAAAAATGGCTAAAAAGACAT
GCF_029599955.1	NZ_JAIZXP0100000441.10666.AOI_01	86.2;Enterocin_L50a	VIYNYYEQKNDWRSYIMGAIAKLVAKFGWPIVKKYYKQIMQFIGEGWAINKIIEWIKKHI	GTGATATACAATTATTATGAACAAAAAAATGATTGGAGGAGTTATATTATGGGAGCAATCGCAAAATTAGTAGCAAAGTTTGGGTGGCCTATTGTTAAAAAGTATTACAAACAAATTATGCAGTTTATTGGAGAAGGATGGGCAATTAACAAAATCATTGAGTGGATTAAAAAACATATT
GCF_029599955.1	NZ_JAIZXP0100000611.10664.AOI_01	91.2;Enterocin_P	MRKKLFSLALIGIFGLVVTNFGTKVDAATRSYGNGVYCNNSKCWVNWGEAKENIAGIVISGWASGLAGMGH	ATGAGAAAAAAATTATTTAGTTTAGCTCTTATTGGAATATTTGGGTTAGTTGTGACAAATTTTGGTACAAAAGTTGATGCAGCTACGCGTTCATATGGTAATGGTGTTTATTGTAATAATAGTAAATGCTGGGTTAACTGGGGAGAAGCTAAAGAGAATATTGCAGGAATCGTTATTAGTGGCTGGGCTTCTGGTTTGGCAGGTATGGGACAT
GCF_029599995.1	NZ_JAIZXQ0100000211.10784.AOI_01	63.3;Enterolysin_A	MENQNESLIKQYVKRHAKRRLFLWLFGTSAGLITILITVFVTLFLILAAGSIDNSDSDSSSGGEAFTGEYSEGLPIYKEIKGRGPFSDEIAQYAVGAAVKYKLLPSVILSQYGYESAFGTSASARNDLNYFGITWFDGCLFPKGTARGIGGIEGGWYMKFPNSKAAFSYYGFMVATQSNFNACVGNKSPGASLLILGRGGYAAAGITEDSPYYTGCMSIITSNKLTEYDEFAMKHWGEGGNDNGTITGEWTNPFPGSSLDKSSFSGGQLFGTNPGGEFRPNGFHDGLDFGSVDHPGSEIHAVHGGKVVYVGNPGISGLGACVIVINYDGLNMVYQEFANSTGNSRVKVGDQVKVGQVIGIRDTAHLHLGFARTDWRQAQGHAFTDDGTWIDPLPFLNSS…	ATGGAAAACCAAAATGAAAGTTTAATCAAGCAGTATGTTAAGCGTCATGCAAAGCGACGCTTATTTTTGTGGTTGTTTGGTACTTCTGCAGGTTTGATTACTATTTTGATTACTGTGTTCGTGACCCTTTTTCTAATACTTGCGGCGGGTTCGATTGATAATTCTGATTCAGATTCAAGTAGTGGTGGCGAAGCTTTTACAGGAGAATATTCGGAAGGATTACCCATTTATAAAGAAATCAAAGGAAGAGGCCCTTTTTCTGATGAGATTGCGCAATATGCTGTAGGTGCAGCAGTGAAATATAAATTATTACCAAGTGTGATTCTTTCGCAATACGGTTATGAATCAGCGTTTGGTACGTCGGCGTCCGCAAGAAATGATCTCAACTATTTTGGGATT…
GCF_029599995.1	NZ_JAIZXQ0100000441.10776.AOI_01	86.2;Enterocin_L50a	MGAIAKLVAKFGWPIVKKYYKQIMQFIGEGWAINKIIEWIKKHI	ATGGGAGCAATCGCAAAATTAGTAGCAAAGTTTGGGTGGCCTATTGTTAAAAAGTATTACAAACAAATTATGCAGTTTATTGGAGAAGGATGGGCAATTAACAAAATCATTGAGTGGATTAAAAAACATATT
GCF_029599995.1	NZ_JAIZXQ0100000441.10776.AOI_01	87.2;Enterocin_L50b	MGAIAKLVTKFGWPLIKKFYKQIMQFIGQGWTIDQIEKWLKRH	ATGGGAGCAATCGCAAAACTAGTGACAAAGTTTGGGTGGCCACTAATCAAAAAATTCTACAAACAAATCATGCAATTTATTGGACAAGGATGGACAATAGATCAAATTGAAAAATGGCTAAAAAGACAT
GCF_029599965.1	NZ_JAIZXR0100000341.10738.AOI_01	63.3;Enterolysin_A	MENQNESLIKQYVKRHAKRRLFLWLFGTSAGLITILITVFVTLFLILAAGSIDNSDSDSSSGGEAFTGEYSEGLPIYKEIKGRGPFSDEIAQYAVGAAVKYKLLPSVILSQYGYESAFGTSASARNDLNYFGITWFDGCLFPKGTARGIGGIEGGWYMKFPNSKAAFSYYGFMVATQSNFNACVGNKSPGASLLILGRGGYAAAGITEDSPYYTGCMSIITSNKLTEYDEFAMKHWGEGGNDNGTITGEWTNPFPGSSLDKSSFSGGQLFGTNPGGEFRPNGFHDGLDFGSVDHPGSEIHAVHGGKVVYVGNPGISGLGACVIVINYDGLNMVYQEFANSTGNSRVKVGDQVKVGQVIGIRDTAHLHLGFARTDWRQAQGHAFTDDGTWIDPLPFLNSS…	ATGGAAAACCAAAATGAAAGTTTAATCAAGCAGTATGTTAAGCGTCATGCAAAGCGACGCTTATTTTTGTGGTTGTTTGGTACTTCTGCAGGTTTGATTACTATTTTGATTACTGTGTTCGTGACCCTTTTTCTAATACTTGCGGCGGGTTCGATTGATAATTCTGATTCAGATTCAAGTAGTGGTGGCGAAGCTTTTACAGGAGAATATTCGGAAGGATTACCCATTTATAAAGAAATCAAAGGAAGAGGCCCTTTTTCTGATGAGATTGCGCAATATGCTGTAGGTGCAGCAGTGAAATATAAATTATTACCAAGTGTGATTCTTTCGCAATACGGTTATGAATCAGCGTTTGGTACGTCGGCGTCCGCAAGAAATGATCTCAACTATTTTGGGATT…
GCF_029599965.1	NZ_JAIZXR0100000461.10741.AOI_01	87.2;Enterocin_L50b	MGAIAKLVTKFGWPLIKKFYKQIMQFIGQGWTIDQIEKWLKRH	ATGGGAGCAATCGCAAAACTAGTGACAAAGTTTGGGTGGCCACTAATCAAAAAATTCTACAAACAAATCATGCAATTTATTGGACAAGGATGGACAATAGATCAAATTGAAAAATGGCTAAAAAGACAT
GCF_029599965.1	NZ_JAIZXR0100000461.10741.AOI_01	86.2;Enterocin_L50a	MGAIAKLVAKFGWPIVKKYYKQIMQFIGEGWAINKIIEWIKKHI	ATGGGAGCAATCGCAAAATTAGTAGCAAAGTTTGGGTGGCCTATTGTTAAAAAGTATTACAAACAAATTATGCAGTTTATTGGAGAAGGATGGGCAATTAACAAAATCATTGAGTGGATTAAAAAACATATT
GCF_029599935.1	NZ_JAIZXS0100000191.10610.AOI_01	95.2;Enterocin_SE-K4	LILGIVLLSVSTLGITVDAATYYGNSVYCNTQKCWVDWSRARSEIVDRGVKAYVNGFTKVLGGVGGR	TTGATTTTAGGAATTGTTTTATTGAGTGTATCTACTTTAGGAATTACAGTAGATGCTGCAACTTATTATGGAAATAGTGTTTATTGTAATACTCAAAAATGTTGGGTAGATTGGAGTAGAGCTCGCTCTGAGATTGTTGATAGAGGAGTAAAAGCTTACGTTAATGGTTTTACGAAAGTGCTAGGTGGAGTCGGTGGAAGA
GCF_029599935.1	NZ_JAIZXS0100000191.10610.AOI_02	63.3;Enterolysin_A	MENQDESLIKQYVKRRAKRRLFLWLFGTSAGLITILITVFVTLFLILAAGSIDNSDSDSSSGGETFTGEYSEGLPIYKEIKGRGPFSDEIAQYAVGAAVKYKLLPSVILSQYGYESAFGTSASARNDLNYFGITWFDGCLFPKGTARGIGGIEGGWYMKFPNSKAAFSYYGFMVATQSNFNACVGNKSPGASLLILGRGGYAAAGITEDSPYYTGCMSIITSNKLTEYDEFAIKHWGEGGNNNGTITGEWTNPFPGSSLDKSSFSGGQLFGTNPGGEFRPNGFHDGLDFGSVDHPGSEIHAVHVGKVVYVGNPGISGLGACVIVINYDGLNMVYQEFANSTGNSCVKVGDQVKVGQVIGIRDTAHLHLGFTRMDWRQAQGHAFTGDGTWIDPLPFLNSS…	ATGGAAAATCAAGATGAAAGTTTAATCAAGCAGTATGTTAAGCGTCGCGCAAAGCGGCGCTTATTTTTGTGGTTGTTTGGTACTTCTGCAGGTTTGATTACCATTTTGATCACTGTATTCGTGACCCTATTTTTAATACTTGCGGCTGGTTCGATTGATAATTCGGATTCAGATTCAAGCAGTGGTGGCGAAACTTTTACAGGAGAGTATTCGGAAGGATTGCCCATTTATAAAGAAATCAAAGGAAGAGGCCCTTTTTCTGATGAGATTGCGCAATATGCCGTAGGTGCAGCAGTGAAATATAAATTATTACCAAGTGTAATCCTTTCTCAATACGGTTACGAATCAGCGTTTGGTACGTCGGCGTCCGCAAGAAATGATCTCAACTATTTTGGAATT…
GCF_029599935.1	NZ_JAIZXS0100000431.10615.AOI_01	86.2;Enterocin_L50a	VIYNYYEQKNDWRSYIMGAIAKLVAKFGWPIVKKYYKQIMQFIGEGWAINKIIEWIKKHI	GTGATATACAATTATTATGAACAAAAAAATGATTGGAGGAGTTATATTATGGGAGCAATCGCAAAATTAGTAGCAAAGTTTGGGTGGCCTATTGTTAAAAAGTATTACAAACAAATTATGCAGTTTATTGGAGAAGGATGGGCAATTAACAAAATCATTGAGTGGATTAAAAAACATATT
GCF_029599935.1	NZ_JAIZXS0100000431.10615.AOI_01	87.2;Enterocin_L50b	MGAIAKLVTKFGWPLIKKFYKQIMQFIGQGWTIDQIEKWLKRH	ATGGGAGCAATCGCAAAACTAGTGACAAAGTTTGGGTGGCCACTAATCAAAAAATTCTACAAACAAATCATGCAATTTATTGGACAAGGATGGACAATAGATCAAATTGAAAAATGGCTAAAAAGACAT
GCF_029599935.1	NZ_JAIZXS0100000531.10597.AOI_01	91.2;Enterocin_P	MRKKLFSLALIGIFGLVVTNFGTKVDAATRSYGNGVYCNNSKCWVNWGEAKENIAGIVISGWASGLAGMGH	ATGAGAAAAAAATTATTTAGTTTAGCTCTTATTGGAATATTTGGGTTAGTTGTGACAAATTTTGGTACAAAAGTTGATGCAGCTACGCGTTCATATGGTAATGGTGTTTATTGTAATAATAGTAAATGCTGGGTTAACTGGGGAGAAGCTAAAGAGAATATTGCAGGAATCGTTATTAGTGGCTGGGCTTCTGGTTTGGCAGGTATGGGACAT
GCF_029599895.1	NZ_JAIZXT0100000251.10437.AOI_01	95.2;Enterocin_SE-K4	LILGIVLLSVSTLGITVDAATYYGNGVYCNTQKCWVDWSRARSEIVDRGVKAYVNGFTKVLGGVGGR	TTGATTTTAGGAATTGTTTTATTGAGTGTATCTACTTTAGGAATTACAGTAGATGCTGCAACTTATTATGGAAATGGTGTTTATTGTAATACTCAAAAATGTTGGGTAGATTGGAGTAGAGCTCGCTCTGAGATTGTTGATAGAGGAGTAAAAGCTTACGTTAATGGTTTTACGAAAGTGCTAGGTGGAGTCGGTGGAAGA
GCF_029599895.1	NZ_JAIZXT0100000251.10437.AOI_02	63.3;Enterolysin_A	MENQDESLIKQYVKRRAKRRLFLWLFGTSAGLITILITVFVTLFLILAAGSIDNSDSDSSSGGETFTGEYSEGLPIYKEIKGRGPFSDEIAQYAVGAAVKYKLLPSVILSQYGYESAFGTSASARNDLNYFGITWFDGCLFPKGTARGIGGIEGGWYMKFPNSKAAFSYYGFMVATQSNFNACVGNKSPGASLLILGRGGYAAAGITEDSPYYTGCMSIITSNKLTEYDEFAIKHWGEGGNNNGTITGEWTNPFPGSSLDKSSFSGGQLFGTNPGGEFRPNGFHDGLDFGSVDHPGSEIHAVHVGKVVYVGNPGISGLGACVIVINYDGLNMVYQEFANSTGNSCVKVGDQVKVGQVIGIRDTAHLHLGFTRMDWRQAQGHAFTGDGTWIDPLPFLNSS…	ATGGAAAATCAAGATGAAAGTTTAATCAAGCAGTATGTTAAGCGTCGCGCAAAGCGGCGCTTATTTTTGTGGTTGTTTGGTACTTCTGCAGGTTTGATTACCATTTTGATCACTGTATTCGTGACCCTATTTTTAATACTTGCGGCTGGTTCGATTGATAATTCGGATTCAGATTCAAGCAGTGGTGGCGAAACTTTTACAGGAGAGTATTCGGAAGGATTGCCCATTTATAAAGAAATCAAAGGAAGAGGCCCTTTTTCTGATGAGATTGCGCAATATGCCGTAGGTGCAGCAGTGAAATATAAATTATTACCAAGTGTAATCCTTTCTCAATACGGTTACGAATCAGCGTTTGGTACGTCGGCGTCCGCAAGAAATGATCTCAACTATTTTGGAATT…
GCF_029599905.1	NZ_JAIZXU0100000151.10505.AOI_01	63.3;Enterolysin_A	MENQDESLIKQYVKRRAKRRLFLWLFGTSAGLITILITVFVTLFLILAAGSIDNSDSDSSSGGETFTGEYSEGLPIYKEIKGRGPFSDEIAKYAVGAAVKYKLLPSVILSQYGYESAFGTSASARNDLNYFGITWFDGCLFPKGTARGIGGIEGGWYMKFPNSKAAFSYYGFMVATQSNFNACVGNKSPGASLLILGRGGYAAAGITGDSPYYTGCMSIITSNKLTEYDEFAIKHWGEGGNNNGTITGEWTNPFPGSSLDKSSFSGGQLFGTNPGGEFRPNGFHDGLDFGSVDHPGSEIHAVHVGKVVYVGNPGISGLGACVIVINYDGLNMVYQEFANSTGNSCVKVGDQVKVGQVIGIRDTAHLHLGFTRMDWRQAQGHAFTGDGTWIDPLPFLNSS…	ATGGAAAATCAAGATGAAAGTTTAATCAAGCAGTATGTTAAGCGTCGCGCAAAGCGGCGCTTATTTTTGTGGTTGTTTGGTACTTCTGCAGGTTTGATTACCATTTTGATCACTGTATTCGTGACCCTATTTTTAATACTTGCGGCTGGTTCGATTGATAATTCGGATTCAGATTCAAGCAGTGGTGGCGAAACTTTTACAGGAGAGTATTCGGAAGGATTGCCCATTTATAAAGAAATCAAAGGAAGAGGCCCTTTTTCTGATGAGATTGCGAAATATGCCGTAGGTGCAGCAGTGAAATATAAATTATTACCAAGTGTAATCCTTTCTCAATACGGTTACGAATCAGCGTTTGGTACGTCGGCGTCCGCAAGAAATGATCTCAACTATTTTGGAATT…
GCF_029599905.1	NZ_JAIZXU0100000471.10500.AOI_01	87.2;Enterocin_L50b	MGAIAKLVTKFGWPLIKKFYKQIMQFIGQGWTIDQIEKWLKRH	ATGGGAGCAATCGCAAAACTAGTGACAAAGTTTGGGTGGCCACTAATCAAAAAATTCTACAAACAAATCATGCAATTTATTGGACAAGGATGGACAATAGATCAAATTGAAAAATGGCTAAAAAGACAT
GCF_029599905.1	NZ_JAIZXU0100000471.10500.AOI_01	86.2;Enterocin_L50a	MNKKNDWRSYIMGAIAKLVAKFGWPIVKKYYKQIMQFIGEGWAINKIIEWIKKHI	ATGAACAAAAAAAATGATTGGAGGAGTTATATTATGGGAGCAATCGCAAAATTAGTAGCAAAGTTTGGGTGGCCTATTGTTAAAAAATATTACAAACAAATTATGCAGTTTATTGGAGAAGGATGGGCAATTAACAAAATCATTGAGTGGATTAAAAAACATATT
GCF_029599855.1	NZ_JAIZXV0100000171.10305.AOI_01	63.3;Enterolysin_A	MENQDESLIKQYVKRRAKRRLFLWLFGTSAGLITILITVFVTLFLILAAGSIDNSDSDSSSGGETFTGEYSEGLPIYKEIKGRGPFSDEIAQYAVGAAVKYKLLPSVILSQYGYESAFGTSASARNDLNYFGITWFDGCLFPKGTARGIGGIEGGWYMKFPNSKAAFSYYGFMVATQSNFNACVGNKSPGASLLILGRGGYAAAGITEDSPYYTGCMSIITSNKLTEYDEFAIKHWGEGGNNNGTITGEWTNPFPGSSLDKSSFSGGQLFGINPGGEFRPNGFHDGLDFGSVDHPGSEIHAVHGGKVVYVGNPGISGLGACVIVINYDGLNMVYQEFANSTGNSCVKVGDQVKVGQVIGIRDTAHLHLGFTRMDWRQAQGHAFTGDGTWIDPLPFLNSS…	ATGGAAAATCAAGATGAAAGTTTAATCAAGCAGTATGTTAAGCGTCGCGCAAAGCGGCGCTTATTTTTGTGGTTGTTTGGTACTTCTGCAGGTTTGATTACCATTTTGATCACTGTATTCGTGACCCTATTTTTAATACTTGCGGCTGGTTCGATTGATAATTCGGATTCAGATTCAAGCAGTGGTGGCGAAACTTTTACAGGAGAGTATTCGGAAGGATTGCCCATTTATAAAGAAATCAAAGGAAGAGGCCCTTTTTCTGATGAGATTGCGCAATATGCCGTAGGTGCAGCAGTGAAATATAAATTATTACCAAGTGTAATCCTTTCTCAATACGGTTACGAATCAGCGTTTGGTACGTCGGCGTCCGCAAGAAATGATCTCAACTATTTTGGAATT…
GCF_029599865.1	NZ_JAIZXW0100000171.10381.AOI_01	63.3;Enterolysin_A	MENQDESLIKQYVKRRAKRRLFLWLFGTSAGLITILITVFVTLFLILAAGSIDNSDSDSSSGGETFTGEYSEGLPIYKEIKGRGPFSDEIAKYAVGAAVKYKLLPSVILSQYGYESAFGTSASARNDLNYFGITWFDGCLFPKGTARGIGGIEGGWYMKFPNSKAAFSYYGFMVATQSNFNACVGNKSPGASLLILGRGGYAAAGITGDSPYYTGCMSIITSNKLTEYDEFAIKHWGEGGNNNGTITGEWTNPFPGSSLDKSSFSGGQLFGTNPGGEFRPNGFHDGLDFGSVDHPGSEIHAVHVGKVVYVGNPGISGLGACVIVINYDGLNMVYQEFANSTGNSCVKVGDQVKVGQVIGIRDTAHLHLGFTRMDWRQAQGHAFTGDGTWIDPLPFLNSS…	ATGGAAAATCAAGATGAAAGTTTAATCAAGCAGTATGTTAAGCGTCGCGCAAAGCGGCGCTTATTTTTGTGGTTGTTTGGTACTTCTGCAGGTTTGATTACCATTTTGATCACTGTATTCGTGACCCTATTTTTAATACTTGCGGCTGGTTCGATTGATAATTCGGATTCAGATTCAAGCAGTGGTGGCGAAACTTTTACAGGAGAGTATTCGGAAGGATTGCCCATTTATAAAGAAATCAAAGGAAGAGGCCCTTTTTCTGATGAGATTGCGAAATATGCCGTAGGTGCAGCAGTGAAATATAAATTATTACCAAGTGTAATCCTTTCTCAATACGGTTACGAATCAGCGTTTGGTACGTCGGCGTCCGCAAGAAATGATCTCAACTATTTTGGAATT…
GCF_029599865.1	NZ_JAIZXW0100000471.10378.AOI_01	87.2;Enterocin_L50b	MGAIAKLVTKFGWPLIKKFYKQIMQFIGQGWTIDQIEKWLKRH	ATGGGAGCAATCGCAAAACTAGTGACAAAGTTTGGGTGGCCACTAATCAAAAAATTCTACAAACAAATCATGCAATTTATTGGACAAGGATGGACAATAGATCAAATTGAAAAATGGCTAAAAAGACAT
GCF_029599865.1	NZ_JAIZXW0100000471.10378.AOI_01	86.2;Enterocin_L50a	MNKKNDWRSYIMGAIAKLVAKFGWPIVKKYYKQIMQFIGEGWAINKIIEWIKKHI	ATGAACAAAAAAAATGATTGGAGGAGTTATATTATGGGAGCAATCGCAAAATTAGTAGCAAAGTTTGGGTGGCCTATTGTTAAAAAATATTACAAACAAATTATGCAGTTTATTGGAGAAGGATGGGCAATTAACAAAATCATTGAGTGGATTAAAAAACATATT
GCF_029599755.1	NZ_JAIZXY0100000391.10021.AOI_01	87.2;Enterocin_L50b	MGAIAKLVTKFGWPLIKKFYKQIMQFIGQGWTIDQIEKWLKRH	ATGGGAGCAATCGCAAAACTAGTGACAAAGTTTGGGTGGCCACTAATCAAAAAATTCTACAAACAAATCATGCAATTTATTGGACAAGGATGGACAATAGATCAAATTGAAAAATGGCTAAAAAGACAT
GCF_029599755.1	NZ_JAIZXY0100000391.10021.AOI_01	86.2;Enterocin_L50a	VIYNYYEQKNDWRSYIMGAIAKLVAKFGWPIVKKYYKQIMQFIGEGWAINKIIEWIKKHI	GTGATATACAATTATTATGAACAAAAAAATGATTGGAGGAGTTATATTATGGGAGCAATCGCAAAATTAGTAGCAAAGTTTGGGTGGCCTATTGTTAAAAAGTATTACAAACAAATTATGCAGTTTATTGGAGAAGGATGGGCAATTAACAAAATCATTGAGTGGATTAAAAAACATATT
GCF_029599755.1	NZ_JAIZXY0100000401.10020.AOI_01	95.2;Enterocin_SE-K4	LILGIVLLSVSTLGITVDAATYYGNGVYCNTQKCWVDWSRARSEIVDRGVKAYVNGFTKVLGGVGGR	TTGATTTTAGGAATTGTTTTATTGAGTGTATCTACTTTAGGAATTACAGTAGATGCTGCAACTTATTATGGAAATGGTGTTTATTGTAATACTCAAAAATGTTGGGTAGATTGGAGTAGAGCTCGCTCTGAGATTGTTGATAGAGGAGTAAAAGCTTACGTTAATGGTTTTACGAAAGTGCTAGGTGGAGTCGGTGGAAGA
GCF_029599755.1	NZ_JAIZXY0100000401.10020.AOI_01	91.2;Enterocin_P	MRKKLFSLALIGIFGLVVTNFGTKVDAATRSYGNGVYCNNSKCWVNWGEAKENIAGIVISGWASGLAGMGH	ATGAGAAAAAAATTATTTAGTTTAGCTCTTATTGGAATATTTGGGTTAGTTGTGACAAATTTTGGTACAAAAGTTGATGCAGCTACGCGTTCATATGGTAATGGTGTTTATTGTAATAATAGTAAATGCTGGGTTAACTGGGGAGAAGCTAAAGAGAATATTGCAGGAATCGTTATTAGTGGCTGGGCTTCTGGTTTGGCAGGTATGGGACAT
GCF_029599805.1	NZ_JAIZXZ0100000191.10233.AOI_01	91.2;Enterocin_P	MRKELFSLALIGIFGLVVTNFGTKVDAATRSYGNGVYCNNSKCWVNWGEAKENIAGIVISGWASGLAGMGH	ATGAGAAAAGAATTATTTAGTTTAGCTCTTATTGGAATATTTGGGTTAGTTGTGACAAATTTTGGTACAAAAGTTGATGCAGCTACGCGTTCATATGGTAATGGTGTTTATTGTAATAATAGTAAATGCTGGGTTAACTGGGGAGAAGCTAAAGAGAATATTGCAGGAATCGTTATTAGTGGCTGGGCTTCTGGTTTGGCAGGTATGGGACAT
GCF_029599805.1	NZ_JAIZXZ0100000361.10210.AOI_01	87.2;Enterocin_L50b	MGAIAKLVTKFGWPLIKKFYKQIMQFIGQGWTIDQIEKWLKRH	ATGGGAGCAATCGCAAAACTAGTGACAAAGTTTGGGTGGCCACTAATCAAAAAATTCTACAAACAAATCATGCAATTTATTGGACAAGGATGGACAATAGATCAAATTGAAAAATGGCTAAAAAGACAT
GCF_029599805.1	NZ_JAIZXZ0100000361.10210.AOI_01	86.2;Enterocin_L50a	MLKFLLILKNFSSKRKKFNCGKLVFATIHLLCINIYFVKYFFCFCVIYNYYEQKNDWRSYIMGAIAKLVAKFGWPIVKKYYKQIMQFIGEGWAINKIIEWIKKHI	ATGTTAAAATTTTTACTTATTTTAAAAAATTTTTCTTCTAAGAGAAAAAAATTTAATTGTGGAAAGCTAGTATTTGCAACAATACATCTTCTATGCATAAATATATATTTTGTCAAATATTTTTTTTGTTTTTGTGTGATATACAATTATTATGAACAAAAAAATGATTGGAGGAGTTATATTATGGGAGCAATCGCAAAATTAGTAGCAAAGTTTGGGTGGCCTATTGTTAAAAAGTATTACAAACAAATTATGCAGTTTATTGGAGAAGGATGGGCAATTAACAAAATCATTGAGTGGATTAAAAAACATATT
GCF_029599735.1	NZ_JAIZYA0100000461.9961.AOI_01	87.2;Enterocin_L50b	MGAIAKLVTKFGWPLIKKFYKQIMQFIGQGWTIDQIEKWLKRH	ATGGGAGCAATCGCAAAACTAGTGACAAAGTTTGGGTGGCCACTAATCAAAAAATTCTACAAACAAATCATGCAATTTATTGGACAAGGATGGACAATAGATCAAATTGAAAAATGGCTAAAAAGACAT
GCF_029599735.1	NZ_JAIZYA0100000461.9961.AOI_01	86.2;Enterocin_L50a	MLKFLLILKNFSSKRKKFNCGKLVFATIHLLCINIYFVKYFFCFCVIYNYYEQKNDWRSYIMGAIAKLVAKFGWPIVKKYYKQIMQFIGEGWAINKIIEWIKKHI	ATGTTAAAATTTTTACTTATTTTAAAAAATTTTTCTTCTAAGAGAAAAAAATTTAATTGTGGAAAGCTAGTATTTGCAACAATACATCTTCTATGCATAAATATATATTTTGTCAAATATTTTTTTTGTTTTTGTGTGATATACAATTATTATGAACAAAAAAATGATTGGAGGAGTTATATTATGGGAGCAATCGCAAAATTAGTAGCAAAGTTTGGGTGGCCTATTGTTAAAAAGTATTACAAACAAATTATGCAGTTTATTGGAGAAGGATGGGCAATTAACAAAATCATTGAGTGGATTAAAAAACATATT
GCF_029599765.1	NZ_JAIZYB0100000141.10062.AOI_01	63.3;Enterolysin_A	MENQDESLIKQYVKRRAKRRLFLWLFGTSAGLITILITVFVTLFLILAAGSIDNSDSDSSSGGETFTGEYSEGLPIYKEIKGRGPFSDEIAQYAVGAAVKYKLLPSVILSQYGYESAFGTSASARNDLNYFGITWFDGCLFPKGTARGIGGIEGGWYMKFPNSKAAFSYYGFMVATQSNFNACVGNKSPGASLLILGRGGYAAAGITEDSPYYTGCMSIITSNKLTEYDEFAIKHWGEGGNNNGTITGEWTNPFPGSSLDKSSFSGGQLFGTNPGGEFRPNGFHDGLDFGSVDHPGSEIHAVHGGKVVYVGNPGISGLGACVIVINYDGLNMVYQEFANSTGNSRVKVGDQVKVGQVIGIRDTAHLHLGFTRMDWRQAQGHAFTDDGTWIDPLPFLNSS…	ATGGAAAATCAAGATGAAAGTTTAATCAAGCAGTATGTTAAGCGTCGCGCAAAGCGGCGCTTATTTTTGTGGTTGTTTGGTACTTCTGCAGGTTTGATTACCATTTTGATCACTGTATTCGTGACCCTATTTTTAATACTTGCGGCTGGTTCGATTGATAATTCTGATTCAGATTCAAGCAGTGGTGGCGAAACTTTTACAGGAGAGTATTCGGAAGGATTGCCCATTTATAAAGAAATCAAAGGAAGAGGCCCTTTTTCTGATGAGATTGCGCAATATGCCGTAGGTGCAGCAGTGAAATATAAATTATTACCAAGTGTAATCCTTTCTCAATACGGTTACGAATCAGCGTTTGGTACGTCGGCGTCCGCAAGAAATGATCTCAACTATTTTGGGATT…
GCF_029599795.1	NZ_JAIZYC0100000411.10180.AOI_01	63.3;Enterolysin_A	MENQDESLIKQYVKRRAKRRLFLWLFGTSAGLITILITVFVTLFLILAAGSIDNSDSDSSSGGETFTGEYSEGLPIYKEIKGRGPFSDEIAQYAVGAAVKYKLLPSVILSQYGYESAFGTSASARNDLNYFGITWFDGCLFPKGTARGIGGIEGGWYMKFPNSKAAFSYYGFMVATQSNFNACVGNKSPGASLLILGRGGYAAAGITEDSPYYTGCMSIITSNKLTEYDEFAIKHWGEGGNNNGTITGEWTNPFPGSSLDKSSFSGGQLFGTNPGGEFRPNGFHDGLDFGSVDHPGSEIHAVHGGKVVYVGNPGISGLGACVIVINYDGLNMVYQEFANSTGNSRVKVGDQVKVGQVIGIRDTAHLHLGFTRMDWRQAQGHAFTDDGTWIDPLPFLNSS…	ATGGAAAATCAAGATGAAAGTTTAATCAAGCAGTATGTTAAGCGTCGCGCAAAGCGGCGCTTATTTTTGTGGTTGTTTGGTACTTCTGCAGGTTTGATTACCATTTTGATCACTGTATTCGTGACCCTATTTTTAATACTTGCGGCTGGTTCGATTGATAATTCTGATTCAGATTCAAGCAGTGGTGGCGAAACTTTTACAGGAGAGTATTCGGAAGGATTGCCCATTTATAAAGAAATCAAAGGAAGAGGCCCTTTTTCTGATGAGATTGCGCAATATGCCGTAGGTGCAGCAGTGAAATATAAATTATTACCAAGTGTAATCCTTTCTCAATACGGTTACGAATCAGCGTTTGGTACGTCGGCGTCCGCAAGAAATGATCTCAACTATTTTGGGATT…
GCF_029599665.1	NZ_JAIZYD0100000171.9777.AOI_01	63.3;Enterolysin_A	MENQDESLIKQYVKRRAKRRLFLWLFGTSAGLITILITVFVTLFLILAAGSIDNSDSDSSSGGETFTGEYSEGLPIYKEIKGRGPFSDEIAQYAVGAAVKYKLLPSVILSQYGYESAFGTSASARNDLNYFGITWFDGCLFPKGTARGIGGIEGGWYMKFPNSKAAFSYYGFMVATQSNFNACVGNKSPGASLLILGRGGYAAAGITEDSPYYTGCMSIITSNKLTEYDEFAIKHWGEGGNNNGTITGEWTNPFPGSSLDKSSFSGGQLFGINPGGEFRPNGFHDGLDFGSVDHPGSEIHAVHGGKVVYVGNPGISGLGACVIVINYDGLNMVYQEFANSTGNSCVKVGDQVKVGQVIGIRDTAHLHLGFTRMDWRQAQGHAFTGDGTWIDPLPFLNSS…	ATGGAAAATCAAGATGAAAGTTTAATCAAGCAGTATGTTAAGCGTCGCGCAAAGCGGCGCTTATTTTTGTGGTTGTTTGGTACTTCTGCAGGTTTGATTACCATTTTGATCACTGTATTCGTGACCCTATTTTTAATACTTGCGGCTGGTTCGATTGATAATTCGGATTCAGATTCAAGCAGTGGTGGCGAAACTTTTACAGGAGAGTATTCGGAAGGATTGCCCATTTATAAAGAAATCAAAGGAAGAGGCCCTTTTTCTGATGAGATTGCGCAATATGCCGTAGGTGCAGCAGTGAAATATAAATTATTACCAAGTGTAATCCTTTCTCAATACGGTTACGAATCAGCGTTTGGTACGTCGGCGTCCGCAAGAAATGATCTCAACTATTTTGGAATT…
GCF_029599645.1	NZ_JAIZYE0100000191.9602.AOI_01	63.3;Enterolysin_A	MENQDESLIKQYVKRRAKRRLFLWLFGTSAGLITILITVFVTLFLILAAGSIDNSDSDSSSGGETFTGEYSEGLPIYKEIKGRGPFSDEIAQYAVGAAVKYKLLPSVILSQYGYESAFGTSASARNDLNYFGITWFDGCLFPKGTARGIGGIEGGWYMKFPNSKAAFSYYGFMVATQSNFNACVGNKSPGASLLILGRGGYAAAGITEDSPYYTGCMSIITSNKLTEYDEFAIKHWGEGGNNNGTITGEWTNPFPGSSLDKSSFSGGQLFGINPGGEFRPNGFHDGLDFGSVDHPGSEIHAVHGGKVVYVGNPGISGLGACVIVINYDGLNMVYQEFANSTGNSCVKVGDQVKVGQVIGIRDTAHLHLGFTRMDWRQAQGHAFTGDGTWIDPLPFLNSS…	ATGGAAAATCAAGATGAAAGTTTAATCAAGCAGTATGTTAAGCGTCGCGCAAAGCGGCGCTTATTTTTGTGGTTGTTTGGTACTTCTGCAGGTTTGATTACCATTTTGATCACTGTATTCGTGACCCTATTTTTAATACTTGCGGCTGGTTCGATTGATAATTCGGATTCAGATTCAAGCAGTGGTGGCGAAACTTTTACAGGAGAGTATTCGGAAGGATTGCCCATTTATAAAGAAATCAAAGGAAGAGGCCCTTTTTCTGATGAGATTGCGCAATATGCCGTAGGTGCAGCAGTGAAATATAAATTATTACCAAGTGTAATCCTTTCTCAATACGGTTACGAATCAGCGTTTGGTACGTCGGCGTCCGCAAGAAATGATCTCAACTATTTTGGAATT…
GCF_029599715.1	NZ_JAIZYF0100000331.9812.AOI_01	63.3;Enterolysin_A	MENQDESLIKQYVKRRAKRRLFLWLFGTSAGLITILITVFVTLFLILAAGSIDNSDSDSSSGGETFTGEYSEGLPIYKEIKGRGPFSDEIAQYAVGAAVKYKLLPSVILSQYGYESAFGTSASARNDLNYFGITWFDGCLFPKGTARGIGGIEGGWYMKFPNSKAAFSYYGFMVATQSNFNACVGNKSPGASLLILGRGGYAAAGITEDSPYYTGCMSIITSNKLTEYDEFAIKHWGEGGNNNGTITGEWTNPFPGSSLDKSSFSGGQLFGTNPGGEFRPNGFHDGLDFGSVDHPGSEIHAVHVGKVVYVGNPGISGLGACVIVINYDGLNMVYQEFANSTGNSCVKVGDQVKVGQVIGIRDTAHLHLGFTRMDWRQAQGHAFTGDGTWIDPLPFLNSS…	ATGGAAAATCAAGATGAAAGTTTAATCAAGCAGTATGTTAAGCGTCGCGCAAAGCGGCGCTTATTTTTGTGGTTGTTTGGTACTTCTGCAGGTTTGATTACCATTTTGATCACTGTATTCGTGACCCTATTTTTAATACTTGCGGCTGGTTCGATTGATAATTCGGATTCAGATTCAAGCAGTGGTGGCGAAACTTTTACAGGAGAGTATTCGGAAGGATTGCCCATTTATAAAGAAATCAAAGGAAGAGGCCCTTTTTCTGATGAGATTGCGCAATATGCCGTAGGTGCAGCAGTGAAATATAAATTATTACCAAGTGTAATCCTTTCTCAATACGGTTACGAATCAGCGTTTGGTACGTCGGCGTCCGCAAGAAATGATCTCAACTATTTTGGAATT…
GCF_029599715.1	NZ_JAIZYF0100000641.9810.AOI_01	86.2;Enterocin_L50a	VIYNYYEQKNDWRSYIMGAIAKLVAKFGWPIVKKYYKQIMQFIGEGWAINKIIEWIKKHI	GTGATATACAATTATTATGAACAAAAAAATGATTGGAGGAGTTATATTATGGGAGCAATCGCAAAATTAGTAGCAAAGTTTGGGTGGCCTATTGTTAAAAAGTATTACAAACAAATTATGCAGTTTATTGGAGAAGGATGGGCAATTAACAAAATCATTGAGTGGATTAAAAAACATATT
GCF_029599715.1	NZ_JAIZYF0100000641.9810.AOI_01	87.2;Enterocin_L50b	MGAIAKLVTKFGWPLIKKFYKQIMQFIGQGWTIDQIEKWLKRH	ATGGGAGCAATCGCAAAACTAGTGACAAAGTTTGGGTGGCCACTAATCAAAAAATTCTACAAACAAATCATGCAATTTATTGGACAAGGATGGACAATAGATCAAATTGAAAAATGGCTAAAAAGACAT
GCF_029599715.1	NZ_JAIZYF0100001241.9892.AOI_01	91.2;Enterocin_P	MRKKLFSLALIGIFGLVVTNFGTKVDAATRSYGNGVYCNNSKCWVNWGEAKENIAGIVISGWASGLAGMGH	ATGAGAAAAAAATTATTTAGTTTAGCTCTTATTGGAATATTTGGGTTAGTTGTGACAAATTTTGGTACAAAAGTTGATGCAGCTACGCGTTCATATGGTAATGGTGTTTATTGTAATAATAGTAAATGCTGGGTTAACTGGGGAGAAGCTAAAGAGAATATTGCAGGAATCGTTATTAGTGGCTGGGCTTCTGGTTTGGCAGGTATGGGACAT
GCF_029599635.1	NZ_JAIZYG0100000191.9546.AOI_01	63.3;Enterolysin_A	MENQNESLIKQYVKRRAKRRLFLWLFGTSAGLMTILITVFVTLFLILAAGSIDNSDSDSSSGGEAFTGEYSEGLPIYKEIKGRGPFSDEIAQYAVGAAVKYKLLPSVILSQYGYESAFGTSASARNDLNYFGITWFDGCLFPKGTARGIGGIEGGWYMKFPNSKAALSYYGFMVATQSNFNACVGNKSPGASLLILGRGGYAAAGITEDSPYYTGCMSIITSNKLTEYDEFAMKHWGEGGNDNGTITGEWTNPFPGSSLDKSSFSGGQLFGTNPGGEFRPNGFHDGLDFGSVDHPGSEIHAVHGGKVVYVGNPGISGLGACVIVINYDGLNMVYQEFANSTGNSRVKVGDQVKVGQVIGIRDTAHLHLGFTRMDWRQAQGHAFTDDGTWIDPLPFLNSS…	ATGGAAAACCAAAATGAAAGTTTAATCAAGCAGTATGTTAAGCGTCGTGCAAAGCGACGCTTATTTTTGTGGTTGTTTGGTACTTCTGCAGGTTTGATGACTATTTTGATCACTGTGTTCGTGACCCTTTTTCTAATACTTGCGGCGGGTTCGATTGATAATTCGGATTCAGATTCAAGCAGTGGTGGCGAAGCTTTTACAGGAGAATATTCGGAAGGATTACCCATTTATAAAGAAATCAAAGGAAGAGGCCCTTTTTCTGATGAGATTGCGCAATATGCTGTAGGTGCAGCAGTGAAATATAAATTATTACCAAGTGTGATCCTTTCGCAATACGGTTACGAATCAGCGTTTGGTACGTCGGCGTCCGCAAGAAATGATCTCAACTATTTTGGGATT…
GCF_029599635.1	NZ_JAIZYG0100000831.9516.AOI_01	91.2;Enterocin_P	VTNFGTKVDAATRSYDNGIYCNNSKCWVNWGEAKGNIAGIVISGWASGLAGMGH	GTGACGAATTTTGGTACAAAAGTTGATGCAGCTACGCGTTCATATGATAATGGTATTTATTGTAATAATAGTAAGTGCTGGGTTAACTGGGGAGAAGCTAAAGGAAATATTGCAGGAATTGTTATTAGTGGCTGGGCTTCTGGCTTGGCAGGTATGGGACAT
GCF_029599655.1	NZ_JAIZYH0100000271.9663.AOI_01	63.3;Enterolysin_A	MENQNESLIKQYVKRRAKRRLFLWLFGTSAGLMTILITVFVTLFLILAAGSIDNSDSDSSSGGEAFTGEYSEGLPIYKEIKGRGPFSDEIAQYAVGAAVKYKLLPSVILSQYGYESAFGTSASARNDLNYFGITWFDGCLFPKGTARGIGGIEGGWYMKFPNSKAALSYYGFMVATQSNFNACVGNKSPGASLLILGRGGYAAAGITEDSPYYTGCMSIITSNKLTEYDEFAMKHWGEGGNDNGTITGEWTNPFPGSSLDKSSFSGGQLFGTNPGGEFRPNGFHDGLDFGSVDHPGSEIHAVHGGKVVYVGNPGISGLGACVIVINYDGLNMVYQEFANSTGNSRVKVGDQVKVGQVIGIRDTAHLHLGFTRMDWRQAQGHAFTDDGTWIDPLPFLNSS…	ATGGAAAACCAAAATGAAAGTTTAATCAAGCAGTATGTTAAGCGTCGTGCAAAGCGACGCTTATTTTTGTGGTTGTTTGGTACTTCTGCAGGTTTGATGACTATTTTGATCACTGTGTTCGTGACCCTTTTTCTAATACTTGCGGCGGGTTCGATTGATAATTCGGATTCAGATTCAAGCAGTGGTGGCGAAGCTTTTACAGGAGAATATTCGGAAGGATTACCCATTTATAAAGAAATCAAAGGAAGAGGCCCTTTTTCTGATGAGATTGCGCAATATGCTGTAGGTGCAGCAGTGAAATATAAATTATTACCAAGTGTGATCCTTTCGCAATACGGTTACGAATCAGCGTTTGGTACGTCGGCGTCCGCAAGAAATGATCTCAACTATTTTGGGATT…
GCF_029599655.1	NZ_JAIZYH0100000851.9664.AOI_01	91.2;Enterocin_P	VTNFGTKVDAATRSYDNGIYCNNSKCWVNWGEAKGNIAGIVISGWASGLAGMGH	GTGACGAATTTTGGTACAAAAGTTGATGCAGCTACGCGTTCATATGATAATGGTATTTATTGTAATAATAGTAAGTGCTGGGTTAACTGGGGAGAAGCTAAAGGAAATATTGCAGGAATTGTTATTAGTGGCTGGGCTTCTGGCTTGGCAGGTATGGGACAT
GCF_029599485.1	NZ_JAIZYI0100000201.9182.AOI_01	63.3;Enterolysin_A	MENQNESLIKQYVKRRAKRRLFLWLFGTSAGLMTILITVFVTLFLILAAGSIDNSDSDSSSGGEAFTGEYSEGLPIYKEIKGRGPFSDEIAQYAVGAAVKYKLLPSVILSQYGYESAFGTSLSAKNDLNFFGITWFDGCLFPKGTARGIGGIEGGWYMKFPNSKAAFSYYGFMVATQSNFNASVGNKSPGASLLILGRGGYAAAGITEDSPYYTGCMSIITSNKLTEYDEFAIKHWGEGGNDNGTITGEWTNPFPGSSLDKSSFSGGQLFGTNPGGEFRPNGFHDGLDFGSVDHPGSEIHAVHGGKVVYVGNPGISGLGACVIVINYDGLNMVYQEFANSTGNSRVKVGDQVKVGQVIGIRDTAHLHLGFTRMDWRQAQGHSFTDDGTWIDPLPFLSSS…	ATGGAAAACCAAAATGAAAGTTTAATCAAGCAGTATGTTAAGCGTCGTGCAAAGCGACGCTTATTTTTGTGGTTGTTTGGTACTTCTGCAGGTTTGATGACTATTTTGATCACTGTGTTCGTGACCCTTTTTCTAATACTTGCGGCGGGTTCGATTGATAATTCGGATTCAGATTCAAGCAGTGGTGGCGAAGCTTTTACAGGAGAATATTCGGAAGGATTACCGATTTATAAAGAAATCAAAGGGAGAGGCCCATTTTCAGATGAAATTGCGCAATATGCGGTAGGAGCAGCCGTAAAATACAAATTATTGCCAAGTGTGATCCTATCGCAATACGGGTATGAATCGGCATTTGGAACGTCTCTATCTGCTAAAAACGACTTGAATTTTTTCGGAATT…
GCF_029599555.1	NZ_JAIZYJ0100000201.9433.AOI_01	63.3;Enterolysin_A	MENQNESLIKQYVKRRAKRRLFLWLFGTSAGLMTILITVFVTLFLILAAGSIDNSDSDSSSGGEAFTGEYSEGLPIYKEIKGRGPFSDEIAQYAVGAAVKYKLLPSVILSQYGYESAFGTSASARNDLNYFGITWFDGCLFPKGTARGIGGIEGGWYMKFPNSKAALSYYGFMVATQSNFNACVGNKSPGASLLILGRGGYAAAGITEDSPYYTGCMSIITSNKLTEYDEFAMKHWGEGGNDNGTITGEWTNPFPGSSLDKSSFSGGQLFGTNPGGEFRPNGFHDGLDFGSVDHPGSEIHAVHGGKVVYVGNPGISGLGACVIVINYDGLNMVYQEFANSTGNSRVKVGDQVKVGQVIGIRDTAHLHLGFTRMDWRQAQGHAFTDDGTWIDPLPFLNSS…	ATGGAAAACCAAAATGAAAGTTTAATCAAGCAGTATGTTAAGCGTCGTGCAAAGCGACGCTTATTTTTGTGGTTGTTTGGTACTTCTGCAGGTTTGATGACTATTTTGATCACTGTGTTCGTGACCCTTTTTCTAATACTTGCGGCGGGTTCGATTGATAATTCGGATTCAGATTCAAGCAGTGGTGGCGAAGCTTTTACAGGAGAATATTCGGAAGGATTACCCATTTATAAAGAAATCAAAGGAAGAGGCCCTTTTTCTGATGAGATTGCGCAATATGCTGTAGGTGCAGCAGTGAAATATAAATTATTACCAAGTGTGATCCTTTCGCAATACGGTTACGAATCAGCGTTTGGTACGTCGGCGTCCGCAAGAAATGATCTCAACTATTTTGGGATT…
GCF_029599555.1	NZ_JAIZYJ0100000831.9423.AOI_01	91.2;Enterocin_P	VTNFGTKVDAATRSYDNGIYCNNSKCWVNWGEAKGNIAGIVISGWASGLAGMGH	GTGACGAATTTTGGTACAAAAGTTGATGCAGCTACGCGTTCATATGATAATGGTATTTATTGTAATAATAGTAAGTGCTGGGTTAACTGGGGAGAAGCTAAAGGAAATATTGCAGGAATTGTTATTAGTGGCTGGGCTTCTGGCTTGGCAGGTATGGGACAT
GCF_029599495.1	NZ_JAIZYK0100000401.9275.AOI_01	87.2;Enterocin_L50b	MGAIAKLVTKFGWPLIKKFYKQIMQFIGQGWTIDQIEKWLKRH	ATGGGAGCAATCGCAAAACTAGTGACAAAGTTTGGGTGGCCACTAATCAAAAAATTCTACAAACAAATCATGCAATTTATTGGACAAGGATGGACAATAGATCAAATTGAAAAATGGCTAAAAAGACAT
GCF_029599495.1	NZ_JAIZYK0100000401.9275.AOI_01	86.2;Enterocin_L50a	MNKKNDWRSYIMGAIAKLVAKFGWPIVKKYYKQIMQFIGEGWAINKIIEWIKKHI	ATGAACAAAAAAAATGATTGGAGGAGTTATATTATGGGAGCAATCGCAAAATTAGTAGCAAAGTTTGGGTGGCCTATTGTTAAAAAATATTACAAACAAATTATGCAGTTTATTGGAGAAGGATGGGCAATTAACAAAATCATTGAGTGGATTAAAAAACATATT
GCF_029599495.1	NZ_JAIZYK0100000541.9292.AOI_01	91.2;Enterocin_P	MRKKLFSLTLIGKFGLVVTNFGTKVDAATRSYGNGVYCNNSKCWVNWGEAKENIAGIVISGWASGLAGMGH	ATGAGAAAAAAATTATTTAGTTTAACTCTTATTGGAAAGTTTGGATTAGTTGTGACGAATTTTGGTACAAAAGTTGATGCAGCTACGCGTTCATATGGTAATGGTGTTTATTGTAATAATAGTAAGTGCTGGGTTAACTGGGGAGAAGCTAAAGAAAATATTGCAGGAATTGTTATTAGTGGCTGGGCTTCTGGCTTGGCAGGTATGGGACAT
GCF_029599475.1	NZ_JAIZYL0100000371.9134.AOI_01	86.2;Enterocin_L50a	VIYNYYEQKNDWRSYIMGAIAKLVAKFGWPIVKKYYKQIMQFIGEGWAINKIIEWIKKHI	GTGATATACAATTATTATGAACAAAAAAATGATTGGAGGAGTTATATTATGGGAGCAATCGCAAAATTAGTAGCAAAGTTTGGGTGGCCTATTGTTAAAAAGTATTACAAACAAATTATGCAGTTTATTGGAGAAGGATGGGCAATTAACAAAATCATTGAGTGGATTAAAAAACATATT
GCF_029599475.1	NZ_JAIZYL0100000371.9134.AOI_01	87.2;Enterocin_L50b	MGAIAKLVTKFGWPLIKKFYKQIMQFIGQGWTIDQIEKWLKRH	ATGGGAGCAATCGCAAAACTAGTGACAAAGTTTGGGTGGCCACTAATCAAAAAATTCTACAAACAAATCATGCAATTTATTGGACAAGGATGGACAATAGATCAAATTGAAAAATGGCTAAAAAGACAT
GCF_029599475.1	NZ_JAIZYL0100000381.9147.AOI_01	91.2;Enterocin_P	MRKKLFSLALIGIFGLVVTNFGTKVDAATRSYGNGVYCNNSKCWVNWGEAKENIAGIVISGWASGLAGMGH	ATGAGAAAAAAATTATTTAGTTTAGCTCTTATTGGAATATTTGGGTTAGTTGTGACAAATTTTGGTACAAAAGTTGATGCAGCTACGCGTTCATATGGTAATGGTGTTTATTGTAATAATAGTAAATGCTGGGTTAACTGGGGAGAAGCTAAAGAGAATATTGCAGGAATCGTTATTAGTGGCTGGGCTTCTGGTTTGGCAGGTATGGGACAT
GCF_029599475.1	NZ_JAIZYL0100000381.9147.AOI_01	95.2;Enterocin_SE-K4	LILGIVLLSVSTLGITVDAATYYGNGVYCNTQKCWVDWSRARSEIVDRGVKAYVNGFTKVLGGVGGR	TTGATTTTAGGAATTGTTTTATTGAGTGTATCTACTTTAGGAATTACAGTAGATGCTGCAACTTATTATGGAAATGGTGTTTATTGTAATACTCAAAAATGTTGGGTAGATTGGAGTAGAGCTCGCTCTGAGATTGTTGATAGAGGAGTAAAAGCTTACGTTAATGGTTTTACGAAAGTGCTAGGTGGAGTCGGTGGAAGA
GCF_029599525.1	NZ_JAIZYM0100000201.9376.AOI_01	63.3;Enterolysin_A	MENQNESLIKQYVKRRAKRRLFLWLFGTSAGLMTILITVFVTLFLILAAGSIDNSDSDSSSGGEAFTGEYSEGLPIYKEIKGRGPFSDEIAQYAVGAAVKYKLLPSVILSQYGYESAFGTSASARNDLNYFGITWFDGCLFPKGTARGIGGIEGGWYMKFPNSKAALSYYGFMVATQSNFNACVGNKSPGASLLILGRGGYAAAGITEDSPYYTGCMSIITSNKLTEYDEFAMKHWGEGGNDNGTITGEWTNPFPGSSLDKSSFSGGQLFGTNPGGEFRPNGFHDGLDFGSVDHPGSEIHAVHGGKVVYVGNPGISGLGACVIVINYDGLNMVYQEFANSTGNSRVKVGDQVKVGQVIGIRDTAHLHLGFTRMDWRQAQGHAFTDDGTWIDPLPFLNSS…	ATGGAAAACCAAAATGAAAGTTTAATCAAGCAGTATGTTAAGCGTCGTGCAAAGCGACGCTTATTTTTGTGGTTGTTTGGTACTTCTGCAGGTTTGATGACTATTTTGATCACTGTGTTCGTGACCCTTTTTCTAATACTTGCGGCGGGTTCGATTGATAATTCGGATTCAGATTCAAGCAGTGGTGGCGAAGCTTTTACAGGAGAATATTCGGAAGGATTACCCATTTATAAAGAAATCAAAGGAAGAGGCCCTTTTTCTGATGAGATTGCGCAATATGCTGTAGGTGCAGCAGTGAAATATAAATTATTACCAAGTGTGATCCTTTCGCAATACGGTTACGAATCAGCGTTTGGTACGTCGGCGTCCGCAAGAAATGATCTCAACTATTTTGGGATT…
GCF_029599525.1	NZ_JAIZYM0100000801.9374.AOI_01	91.2;Enterocin_P	VTNFGTKVDAATRSYDNGIYCNNSKCWVNWGEAKGNIAGIVISGWASGLAGMGH	GTGACGAATTTTGGTACAAAAGTTGATGCAGCTACGCGTTCATATGATAATGGTATTTATTGTAATAATAGTAAGTGCTGGGTTAACTGGGGAGAAGCTAAAGGAAATATTGCAGGAATTGTTATTAGTGGCTGGGCTTCTGGCTTGGCAGGTATGGGACAT
GCF_022509645.1	NZ_JAJAOF0100000071.5020.AOI_01	76.2;EJ97enterocin	VISMKFKFNPTGTIVKKLTQYEIAWFKNKHGYYPWEIPRC	GTGATTTCCATGAAATTTAAATTTAATCCCACAGGAACCATCGTAAAAAAATTAACTCAATATGAAATAGCATGGTTCAAAAATAAACATGGATACTATCCATGGGAAATTCCTAGATGC
GCF_022509665.1	NZ_JAJAOH0100000141.5101.AOI_01	95.2;Enterocin_SE-K4	MKKKFVSIFMILGIVLLSVSTLGITVDAATYYGNGVYCNTQKCWVDWSRARSEIVDRGVKAYVNGFTKVLGGVGGR	ATGAAGAAAAAATTTGTTAGTATTTTTATGATTTTAGGAATTGTTTTATTGAGTGTATCTACTTTAGGAATTACAGTAGATGCTGCAACTTATTATGGAAATGGTGTTTATTGTAATACTCAAAAATGTTGGGTAGATTGGAGTAGAGCTCGCTCTGAGATTGTTGATAGAGGAGTAAAAGCTTACGTTAATGGTTTTACGAAAGTGCTAGGTGGAGTCGGTGGAAGA
GCF_022509665.1	NZ_JAJAOH0100000141.5101.AOI_02	63.3;Enterolysin_A	MENQNESLIKQYVKRRAKRRLFLWLFGTSAGLMTILITVFVTLFLILAAGSIDNSDSDSSSGGEAFTGEYSEGLPIYKEIKGRGPFSDEIAQYAVGAAVKYKLLPSVILSQYGYESAFGTSLSAKNDLNFFGITWFDGCLFPKGTARGIGGIEGGWYMKFPNSKAAFSYYGFMVATQSNFNASVGNKSPGASLLILGRGGYAAAGITEDSPYYTGCMSIITSNKLTEYDEFAIKHWGEGGNDNGTITGEWTNPFPGSSLDKSSFSGGQLFGTNPGGEFRPNGFHDGLDFGSVDHPGSEIHAVHGGKVVYVGNPGISGLGACVIVINYDGLNMVYQEFANSTGNSRVKVGDQVKVGQVIGIRDTAHLHLGFTRMDWRQAQGHAFTDDGTWIDPLPFLNSS…	ATGGAAAACCAAAATGAAAGTTTAATCAAGCAGTATGTTAAGCGTCGTGCAAAGCGACGCTTATTTTTGTGGTTGTTTGGTACTTCTGCAGGTTTGATGACTATTTTGATCACTGTGTTCGTGACCCTTTTTCTAATACTTGCGGCGGGTTCGATTGATAATTCGGATTCAGATTCAAGCAGTGGTGGCGAAGCTTTTACAGGAGAATATTCGGAAGGATTACCGATTTATAAAGAAATCAAAGGGAGAGGCCCATTTTCAGATGAAATTGCGCAATATGCGGTAGGAGCAGCCGTAAAATACAAATTATTGCCAAGTGTGATCCTATCGCAATACGGGTATGAATCGGCATTTGGAACGTCTCTATCTGCTAAAAACGACTTGAATTTTTTCGGAATT…
GCF_022509665.1	NZ_JAJAOH0100000401.5083.AOI_01	91.2;Enterocin_P	MRKKLFSLTLIGKFGLVVTNFGTKVDAATRSYGNGVYCNNSKCWVNWGEAKENIAGIVISGWASGLAGMGH	ATGAGAAAAAAATTATTTAGTTTAACTCTTATTGGAAAGTTTGGATTAGTTGTGACGAATTTTGGTACAAAAGTTGATGCAGCTACGCGTTCATATGGTAATGGTGTTTATTGTAATAATAGTAAGTGCTGGGTTAACTGGGGAGAAGCTAAAGAAAATATTGCAGGAATTGTTATTAGTGGCTGGGCTTCTGGCTTGGCAGGTATGGGACAT
GCF_020593225.1	NZ_JAJDLB0100000061.4891.AOI_01	225.2;UviB	MEKLLGTLLSNPEQISFAVLFVGLFIWVMQQNNAREKRYQNTIDKLTNALGDVEAIKSTVEKIHEKLQ	ATGGAAAAATTATTAGGAACGTTGCTGTCAAATCCTGAACAAATCAGTTTTGCTGTATTGTTCGTGGGGTTATTTATTTGGGTAATGCAACAGAATAATGCAAGAGAAAAAAGATATCAAAATACAATCGACAAGTTAACAAATGCTTTGGGTGATGTAGAAGCAATAAAAAGTACTGTAGAGAAGATTCACGAGAAATTACAG
GCF_020593225.1	NZ_JAJDLB0100000131.4883.AOI_01	95.2;Enterocin_SE-K4	LILGIVLLSVSTLGITVDAATYYGNGVYCNTQKCWVDWSRARSEIVDRGVKAYVNGFTKVLGGVGGR	TTGATTTTAGGAATTGTTTTATTGAGTGTATCTACTTTAGGAATTACAGTAGATGCTGCAACTTATTATGGAAATGGTGTTTATTGTAATACTCAAAAATGTTGGGTAGATTGGAGTAGAGCTCGCTCTGAGATTGTTGATAGAGGAGTAAAAGCTTACGTTAATGGTTTTACGAAAGTGCTAGGTGGAGTCGGTGGAAGA
GCF_021229185.1	NZ_JAJQWS0100000141.4988.AOI_01	63.3;Enterolysin_A	MENQNESLIKQYVKRRAKRRLFLWLFGTSAGLITILITVYVTLFLILAAGSIDNSDSDSSSGGEVFGEAFTGEYSEGLPIYKEIKGRGPFSDEIAQYAVGAAVKYKLLPSVILSQYGYESAFGTSASARNDLNYFGITWFDGCLFPKGTARGIGGIEGGWYMKFPNSKAAFSYYGFMVATQSNFNASVGNKSPGASLLILGRGGYAAAGITEDSPYYTGCMSIITSNKLTEYDEFAIKHWGEGGNDNGTITGEWTNPFPGSSLDKSSFSGGQLFGTNPGGEFRPNGFHDGLDFGSVDHPGSEIHAVHGGKVVYVGNPGISGLGACVIVINYDGLNMVYQEFANSTGNSRVKVGDQVKVGQVIGIRDTAHLHLGFTRMDWRQAQGHAFTDDGTWIDPLPF…	ATGGAAAACCAAAATGAAAGTTTAATCAAGCAGTATGTTAAGCGTCGTGCAAAGCGACGCTTATTTTTGTGGTTGTTTGGTACTTCTGCAGGTTTGATTACTATTTTGATCACTGTGTACGTGACCCTTTTTCTAATACTGGCGGCGGGTTCGATTGATAATTCTGATTCAGATTCAAGCAGTGGTGGCGAAGTTTTTGGCGAAGCTTTTACAGGAGAATATTCGGAAGGATTACCCATTTATAAAGAAATCAAAGGAAGAGGCCCTTTTTCTGATGAGATTGCGCAATATGCTGTAGGTGCAGCAGTGAAATATAAATTATTACCAAGTGTGATCCTTTCGCAATACGGTTACGAATCAGCGTTTGGTACGTCGGCGTCCGCAAGAAATGATCTCAAT…
GCF_028888065.1	NZ_JAJUKM0100000231.9106.AOI_01	63.3;Enterolysin_A	MENQDESLIKQYVKRRAKRRLFLWLFGTSAGLITILITVFVTLFLILAAGSIDNSDSDSSSGGETFTGEYSEGLPIYKEIKGRGPFSDEIAQYAVGAAVKYKLLPSVILSQYGYESAFGTSASARNDLNYFGITWFDGCLFPKGTARGIGGIEGGWYMKFPNSKAAFSYYGFMVATQSNFNACVGNKSPGASLLILGRGGYAAAGITEDSPYYTGCMSIITSNKLTEYDEFAIKHWGEGGNNNGTITGEWTNPFPGSSLDKSSFSGGQLFGTNPGGEFRPNGFHDGLDFGSVDHPGSEIHAVHGGKVVYVGNPGISGLGACVIVINYDGLNMVYQEFANSTGNSCVKVGDQVKVGQVIGIRDTAHLHLGFTRMDWRQAQGHAFTGDGTWIDPLPFLNSS…	ATGGAAAATCAAGATGAAAGTTTAATCAAGCAGTATGTTAAGCGTCGCGCAAAGCGGCGCTTATTTTTGTGGTTGTTTGGTACTTCTGCAGGTTTGATTACCATTTTGATCACTGTATTCGTGACCCTATTTTTAATACTTGCGGCTGGTTCGATTGATAATTCTGATTCAGATTCAAGCAGTGGTGGCGAAACTTTTACAGGAGAGTATTCGGAAGGATTGCCCATTTATAAAGAAATCAAAGGAAGAGGCCCTTTTTCTGATGAGATTGCGCAATATGCCGTAGGTGCAGCAGTGAAATATAAATTATTACCAAGTGTAATCCTTTCTCAATACGGTTACGAATCAGCGTTTGGTACGTCGGCGTCCGCAAGAAATGATCTCAACTATTTTGGGATT…
GCF_028888065.1	NZ_JAJUKM0100000691.9110.AOI_01	91.2;Enterocin_P	MRKKLFSLALIGIFGLVVTNFGTKVDAATRSYGNGVYCNNSKCWVNWGEAKENIAGIVISGWASGLAGMGH	ATGAGAAAAAAATTATTTAGTTTAGCTCTTATTGGAATATTTGGGTTAGTTGTGACAAATTTTGGTACAAAAGTTGATGCAGCTACGCGTTCATATGGTAATGGTGTTTATTGTAATAATAGTAAATGCTGGGTTAACTGGGGAGAAGCTAAAGAGAATATTGCAGGAATCGTTATTAGTGGCTGGGCTTCTGGTTTGGCAGGTATGGGACAT
GCF_028888065.1	NZ_JAJUKM0100000721.9067.AOI_01	95.2;Enterocin_SE-K4	LILGIVLLSVSTLGITVDAATYYGNGVYCNTQKCWVDWSRARSEIVDRGVKAYVNGFTKVLGGVGGR	TTGATTTTAGGAATTGTTTTATTGAGTGTATCTACTTTAGGAATTACAGTAGATGCTGCAACTTATTATGGAAATGGTGTTTATTGTAATACTCAAAAATGTTGGGTAGATTGGAGTAGAGCTCGCTCTGAGATTGTTGATAGAGGAGTAAAAGCTTACGTTAATGGTTTTACGAAAGTGCTAGGTGGAGTCGGTGGAAGA
GCF_022586915.1	NZ_JAKZMR0100000641.5137.AOI_01	76.2;EJ97enterocin	VISMKFKFNPTGTIVKKLTQYEIAWFKNKHGYYPWEIPRC	GTGATTTCCATGAAATTTAAATTTAATCCCACAGGAACCATCGTAAAAAAATTAACTCAATATGAAATAGCATGGTTCAAAAATAAACATGGATACTATCCATGGGAAATTCCTAGATGC
GCF_024581245.1	NZ_JAMDJM0100000081.5285.AOI_01	225.2;UviB	MEKLLGSLLSNPEQISFAVLFVGLFIWVMQQNNAREKRYQGTIDKLTDALGDVEDIKSTVEKIHEKLQ	ATGGAAAAATTACTAGGGTCGTTACTCTCAAACCCTGAACAGATCAGCTTTGCTGTTTTGTTTGTGGGATTGTTTATTTGGGTGATGCAGCAGAATAACGCACGAGAAAAAAGGTATCAAGGGACGATCGACAAACTGACGGATGCTCTGGGCGATGTGGAAGATATCAAAAGTACCGTGGAGAAGATCCACGAAAAATTACAG
GCF_024581245.1	NZ_JAMDJM0100000211.5254.AOI_01	63.3;Enterolysin_A	MENQDESLIKQYVKRRAKRRLFLWLFGTSAGLITILITVFVTLFLILAAGSIDNSDSDSSSGGETFTGEYSEGLPIYKEIKGRGPFSDEIAQYAVGAAVKYKLLPSVILSQYGYESAFGTSASARNDLNYFGITWFDGCLFPKGTARGIGGIEGGWYMKFPNSKAAFSYYGFMVATQSNFNACVGNKSPGASLLILGRGGYAAAGITEDSPYYTGCMSIITSNKLTEYDEFAIKHWGEGGNNNGTITGEWTNPFPGSSLDKSSFSGGQLFGTNPGGEFRPNGFHDGLDFGSVDHPGSEIHAVHVGKVVYVGNPGISGLGACVIVINYDGLNMVYQEFANSTGNSCVKVGDQVKVGQVIGIRDTAHLHLGFTRMDWRQAQGHAFTGDGTWIDPLPFLNSS…	ATGGAAAATCAAGATGAAAGTTTAATCAAGCAGTATGTTAAGCGTCGCGCAAAGCGGCGCTTATTTTTGTGGTTGTTTGGTACTTCTGCAGGTTTGATTACCATTTTGATCACTGTATTCGTGACCCTATTTTTAATACTTGCGGCTGGTTCGATTGATAATTCGGATTCAGATTCAAGCAGTGGTGGCGAAACTTTTACAGGAGAGTATTCGGAAGGATTGCCCATTTATAAAGAAATCAAAGGAAGAGGCCCTTTTTCTGATGAGATTGCGCAATATGCCGTAGGTGCAGCAGTGAAATATAAATTATTACCAAGTGTAATCCTTTCTCAATACGGTTACGAATCAGCGTTTGGTACGTCGGCGTCCGCAAGAAATGATCTCAACTATTTTGGAATT…
GCF_024581245.1	NZ_JAMDJM0100000391.5305.AOI_01	91.2;Enterocin_P	MRKKLFSLALIGIFGLVVTNFGTKVDAATRSYGNGVYCNNSKCWVNWGEAKENIAGIVISGWASGLAGMGH	ATGAGAAAAAAATTATTTAGTTTAGCTCTTATTGGAATATTTGGGTTAGTTGTGACAAATTTTGGTACAAAAGTTGATGCAGCTACGCGTTCATATGGTAATGGTGTTTATTGTAATAATAGTAAATGCTGGGTTAACTGGGGAGAAGCTAAAGAGAATATTGCAGGAATCGTTATTAGTGGCTGGGCTTCTGGTTTGGCAGGTATGGGACAT
GCF_024581245.1	NZ_JAMDJM0100000531.5263.AOI_01	87.2;Enterocin_L50b	MGAIAKLVTKFGWPLIKKFYKQIMQFIGQGWTIDQIEKWLKRH	ATGGGAGCAATCGCAAAACTAGTGACAAAGTTTGGGTGGCCACTAATCAAAAAATTCTACAAACAAATCATGCAATTTATTGGACAAGGATGGACAATAGATCAAATTGAAAAATGGCTAAAAAGACAT
GCF_024581245.1	NZ_JAMDJM0100000531.5263.AOI_01	86.2;Enterocin_L50a	MLKFLLILKNFSSKRKKFNCGKLVFATIHLLCINIYFVKYFFCFCVIYNYYEQKNDWRSYIMGAIAKLVAKFGWPIVKKYYKQIMQFIGEGWAINKIIEWIKKHI	ATGTTAAAATTTTTACTTATTTTAAAAAATTTTTCTTCTAAGAGAAAAAAATTTAATTGTGGAAAGCTAGTATTTGCAACAATACATCTTCTATGCATAAATATATATTTTGTCAAATATTTTTTTTGTTTTTGTGTGATATACAATTATTATGAACAAAAAAATGATTGGAGGAGTTATATTATGGGAGCAATCGCAAAATTAGTAGCAAAGTTTGGGTGGCCTATTGTTAAAAAGTATTACAAACAAATTATGCAGTTTATTGGAGAAGGATGGGCAATTAACAAAATCATTGAGTGGATTAAAAAACATATT
GCF_023653355.1	NZ_JAMOBR0100000021.5201.AOI_01	95.2;Enterocin_SE-K4	LILGIVLLSVSTLGITVDAATYYGNGVYCNTQKCWVDWSRARSEIVDRGVKAYVNGFTKVLGGVGGR	TTGATTTTAGGAATTGTTTTATTGAGTGTATCTACTTTAGGAATTACAGTAGATGCTGCAACTTATTATGGAAATGGTGTTTATTGTAATACTCAAAAATGTTGGGTAGATTGGAGTAGAGCTCGCTCTGAGATTGTTGATAGAGGAGTAAAAGCTTACGTTAATGGTTTTACGAAAGTGCTAGGTGGAGTCGGTGGAAGA
GCF_023653355.1	NZ_JAMOBR0100000021.5201.AOI_02	63.3;Enterolysin_A	MENQNESLIKQYVKRRAKRRLFLWLFGTSAGLITILITVFVTLFLILAAGSIDNSDSDSSSGGETFTGEYSEGLPIYKEIKGRGPFSDEIAQYAVGAAVKYKLLPSVILSQYGYESAFGTSASARNDLNYFGITWFDGCLFPKGTARGIGGIEGGWYMKFPNSKAAFSYYGFMVATQSNFNACVGNKSPGASLLILGRGGYAAAGITEDSPYYTGCMSIITSNKLTEYDEFAIKHWGEGGNNNGTITGEWTNPFPGSSLDKSSFSGGQLFGTNPGGEFRPNGFHDGLDFGSVDHPGSEIHAVHGGKVVYVGNPGISGLGACVIVINYDGLNMVYQEFANSTGNSRVKVGDQVKVGQVIGIRDTAHLHLGFTRMDWRQAQGHAFTDDGTWIDPLPFLNSS…	ATGGAAAACCAAAATGAAAGTTTAATCAAGCAGTATGTTAAGCGTCGTGCAAAGCGACGCTTATTTTTGTGGTTGTTTGGTACTTCTGCAGGTTTGATTACCATTTTGATCACTGTATTCGTGACCCTATTTTTAATACTTGCGGCTGGTTCGATTGATAATTCTGATTCAGATTCAAGCAGTGGTGGCGAAACTTTTACAGGAGAGTATTCGGAAGGATTGCCCATTTATAAAGAAATCAAAGGAAGAGGCCCTTTTTCTGATGAGATTGCGCAATATGCCGTAGGTGCAGCAGTGAAGTATAAATTATTACCAAGTGTGATCCTTTCGCAATACGGGTATGAATCAGCGTTTGGTACGTCGGCGTCTGCAAGAAATGATCTCAACTATTTTGGGATT…
GCF_035791855.1	NZ_JAMRMO0100000151.13753.AOI_01	95.2;Enterocin_SE-K4	LILGIVLLSVSTLGITVDAATYYGNGVYCNTQKCWVDWSRARSEIVDRGVKAYVNGFTKVLGGVGGR	TTGATTTTAGGAATTGTTTTATTGAGTGTATCTACTTTAGGAATTACAGTAGATGCTGCAACTTATTATGGAAATGGTGTTTATTGTAATACTCAAAAATGTTGGGTAGATTGGAGTAGAGCTCGCTCTGAGATTGTTGATAGAGGAGTAAAAGCTTACGTTAATGGTTTTACGAAAGTACTAGGTGGAGTCGGTGGAAGA
GCF_035791855.1	NZ_JAMRMO0100000151.13753.AOI_02	63.3;Enterolysin_A	MENQNESLIKQYVKRRAKRRLFLWLFGTSAGLMTILITVFVTLFLILAAGSIDNSDSDSSSGGEAFTGEYSEGLPIYKEIKGRGPFSDEIAQYAVGAAVKYKLLPSVILSQYGYESAFGTSASARNDLNYFGITWFDGCLFPKGTARGIGGIEGGWYMKFPNSKAALSYYGFMVATQSNFNACVGNKSPGASLLILGRGGYAAAGITEDSPYYTGCMSIITSNKLTEYDEFAMKHWGEGGNDNGTITGEWTNPFPGSSLDKSSFSGGQLFGTNPGGEFRPNGFHDGLDFGSVDHPGSEIHAVHGGKVVYVGNPGISGLGACVIVINYDGLNMVYQEFANSTGNSRVKVGDQVKVGQVIGIRDTAHLHLGFTRMDWRQAQGHAFTDDGTWIDPLPFLNSS…	ATGGAAAACCAAAATGAAAGTTTAATCAAGCAGTATGTTAAGCGTCGTGCAAAGCGACGCTTATTTTTGTGGTTGTTTGGTACTTCTGCAGGTTTGATGACTATTTTGATCACTGTGTTCGTGACCCTTTTTCTAATACTTGCGGCGGGTTCGATTGATAATTCGGATTCAGATTCAAGCAGTGGTGGCGAAGCTTTTACAGGAGAATATTCGGAAGGATTACCGATTTATAAAGAAATCAAAGGGAGAGGCCCATTTTCAGATGAAATTGCGCAATATGCTGTAGGTGCAGCAGTGAAATATAAATTATTACCAAGTGTGATCCTTTCGCAATACGGTTACGAATCAGCGTTTGGTACGTCGGCGTCCGCAAGAAATGATCTCAACTATTTTGGGATT…
GCF_035791855.1	NZ_JAMRMO0100000181.13759.AOI_01	81.2;Enterocin_A	LRKKDCFMKEFKELSVKEMQQVQGGATHSGKYYGNGVYCTKEKCTVDWAKASTCIAGMSIGGFLGGAIPGKC	TTGAGAAAGAAGGATTGTTTTATGAAAGAATTTAAAGAATTGTCTGTAAAAGAAATGCAACAAGTTCAAGGTGGAGCTACTCACAGCGGTAAATATTATGGAAATGGTGTTTATTGTACTAAGGAGAAATGTACAGTTGACTGGGCTAAAGCTAGTACATGCATTGCAGGAATGTCTATTGGTGGTTTTTTAGGCGGAGCAATTCCTGGGAAGTGT
GCF_035791855.1	NZ_JAMRMO0100000271.13732.AOI_01	93.2;Enterocin_Q	MNFLKNGIAKWMTGAELQAYKKKYGCLPWEKISCx	ATGAATTTTCTTAAAAATGGTATCGCAAAATGGATGACCGGTGCTGAATTGCAAGCGTATAAAAAGAAATATGGATGCTTGCCATGGGAAAAAATTTCTTGTTAA
GCF_035791835.1	NZ_JAMRMP0100000101.13726.AOI_01	63.3;Enterolysin_A	MENQNESLIKQYVKRRAKRRLFLWLFGTSAGLITILITVFVTLFLILAAGSIDNSDSDSSSGGEAFTGEYSEGLPIYKEIKGRGPFSDEIAQYAVGAAVKYKLLPSVILSQYGYESAFGTSASARNDLNYFGITWFDGCLFPKGTARGIGGIEGGWYMKFPNSKAAFSYYGFMVATQSNFNACVGNKSPGTSLLILGRGGYAAAGITEDSPYYTGCMSIITSNKLTEYDEFAMKHWGEGGNDNGTITGEWTNPFPGSSLDKSSFSGGQLFGTNPGGEFRPNGFHDGLDFGSVDHPGSEIHAVHGGKVVYVGNPGISGLGACVIVINYDGLNMVYQEFANSTGNSRVKVGDQVKVGQVIGIRDTAHLHLGFTRMDWRQAQGHAFTGDGTWIDPLPFLNSS…	ATGGAAAACCAAAATGAAAGTTTAATCAAGCAGTATGTTAAGCGTCGTGCAAAGCGACGCTTATTTTTGTGGTTGTTTGGTACTTCTGCAGGTTTGATTACTATTTTGATTACTGTGTTCGTGACCCTTTTTCTAATACTTGCGGCGGGTTCGATTGATAATTCTGATTCAGATTCAAGTAGTGGTGGCGAAGCTTTTACAGGAGAATATTCGGAAGGATTACCCATTTATAAAGAAATCAAAGGAAGAGGCCCTTTTTCTGATGAGATTGCGCAATATGCTGTAGGTGCAGCAGTGAAATATAAATTATTACCAAGTGTGATCCTTTCGCAATACGGTTACGAATCAGCGTTTGGTACGTCGGCGTCCGCAAGAAATGATCTCAACTATTTTGGGATT…
GCF_035791835.1	NZ_JAMRMP0100000141.13712.AOI_01	91.2;Enterocin_P	VTNFGTKVDAATRSYDNGIYCNNSKCWVNWGEAKENIAGIVISGWASGLAGMGH	GTGACGAATTTTGGTACAAAAGTTGATGCAGCTACGCGTTCATATGATAATGGTATTTATTGTAATAATAGTAAGTGCTGGGTTAACTGGGGAGAAGCTAAAGAAAATATTGCAGGAATTGTTATTAGTGGCTGGGCTTCTGGCTTGGCAGGTATGGGACAT
GCF_035794575.1	NZ_JAMWLL0100000101.13791.AOI_01	95.2;Enterocin_SE-K4	LILGIVLLSVSTLGITVDAATYYGNGVYCNTQKCWVDWSRARSEIVDRGVKAYVNGFTKVLGGVGGR	TTGATTTTAGGAATTGTTTTATTGAGTGTATCTACTTTAGGAATTACAGTAGATGCTGCAACTTATTATGGAAATGGTGTTTATTGTAATACTCAAAAATGTTGGGTAGATTGGAGTAGAGCTCGCTCTGAGATTGTTGATAGAGGAGTAAAAGCTTACGTTAATGGTTTTACAAAAGTGCTAGGTGGAGTCGGTGGAAGA
GCF_035794575.1	NZ_JAMWLL0100000111.13788.AOI_01	91.2;Enterocin_P	VTNFGTKVDAATRSYDNGIYCNNSKCWVNWGEAKENIAGIVISGWASGLAGMGH	GTGACGAATTTTGGTACAAAAGTTGATGCAGCTACGCGTTCATATGATAATGGTATTTATTGTAATAATAGTAAGTGCTGGGTTAACTGGGGAGAAGCTAAAGAAAATATTGCAGGAATTGTTATTAGTGGCTGGGCTTCTGGCTTGGCAGGTATGGGACAT
GCF_035794475.1	NZ_JAMWLM0100000131.13767.AOI_01	95.2;Enterocin_SE-K4	LILGIVLLSVSTLGITVDAATYYGNGVYCNTQKCWVDWSRARSEIVDRGVKAYVNGFTKVLGGVGGR	TTGATTTTAGGAATTGTTTTATTGAGTGTATCTACTTTAGGAATTACAGTAGATGCTGCAACTTATTATGGAAATGGTGTTTATTGTAATACTCAAAAATGTTGGGTAGATTGGAGTAGAGCTCGCTCTGAGATTGTTGATAGAGGAGTAAAAGCTTACGTTAATGGTTTTACAAAAGTGCTAGGTGGAGTCGGTGGAAGA
GCF_035794475.1	NZ_JAMWLM0100000141.13778.AOI_01	91.2;Enterocin_P	VTNFGTKVDAATRSYDNGIYCNNSKCWVNWGEAKENIAGIVISGWASGLAGMGH	GTGACGAATTTTGGTACAAAAGTTGATGCAGCTACGCGTTCATATGATAATGGTATTTATTGTAATAATAGTAAGTGCTGGGTTAACTGGGGAGAAGCTAAAGAAAATATTGCAGGAATTGTTATTAGTGGCTGGGCTTCTGGCTTGGCAGGTATGGGACAT
GCF_023956365.1	NZ_JAMXGG0100000261.5240.AOI_01	87.2;Enterocin_L50b	MGAIAKLVTKFGWPLIKKFYKQIMQFIGQGWTIDQIEKWLKRH	ATGGGAGCAATCGCAAAACTAGTGACAAAGTTTGGGTGGCCACTAATCAAAAAATTCTACAAACAAATCATGCAATTTATTGGACAAGGATGGACAATAGATCAAATTGAAAAATGGCTAAAAAGACAT
GCF_023956365.1	NZ_JAMXGG0100000261.5240.AOI_01	86.2;Enterocin_L50a	VIYNYYEQKNDWRSYIMGAIAKLVAKFGWPIVKKYYKQIMQFIGEGWAINKIIEWIKKHI	GTGATATACAATTATTATGAACAAAAAAATGATTGGAGGAGTTATATTATGGGAGCAATCGCAAAATTAGTAGCAAAGTTTGGGTGGCCTATTGTTAAAAAGTATTACAAACAAATTATGCAGTTTATTGGAGAAGGATGGGCAATTAACAAAATCATTGAGTGGATTAAAAAACATATT
GCF_023956365.1	NZ_JAMXGG0100000281.5242.AOI_01	95.2;Enterocin_SE-K4	LILGIVLLSVSTLGITVDAATYYGNGVYCNTQKCWVDWSRARSEIVDRGVKAYVNGFTKVLGGVGGR	TTGATTTTAGGAATTGTTTTATTGAGTGTATCTACTTTAGGAATTACAGTAGATGCTGCAACTTATTATGGAAATGGTGTTTATTGTAATACTCAAAAATGTTGGGTAGATTGGAGTAGAGCTCGCTCTGAGATTGTTGATAGAGGAGTAAAAGCTTACGTTAATGGTTTTACGAAAGTGCTAGGTGGAGTCGGTGGAAGA
GCF_023956365.1	NZ_JAMXGG0100000281.5242.AOI_01	91.2;Enterocin_P	MRKKLFSLALIGIFGLVVTNFGTKVDAATRSYGNGVYCNNSKCWVNWGEAKENIAGIVISGWASGLAGMGH	ATGAGAAAAAAATTATTTAGTTTAGCTCTTATTGGAATATTTGGGTTAGTTGTGACAAATTTTGGTACAAAAGTTGATGCAGCTACGCGTTCATATGGTAATGGTGTTTATTGTAATAATAGTAAATGCTGGGTTAACTGGGGAGAAGCTAAAGAGAATATTGCAGGAATCGTTATTAGTGGCTGGGCTTCTGGTTTGGCAGGTATGGGACAT
GCF_026183775.1	NZ_JAMYDK0100000261.5427.AOI_01	63.3;Enterolysin_A	MENKNESLIKQYVKRRAKRRLFLWLFGTSAGLITILITVFVTFFLILAAGSIDNSDSDSSSGGEAFTGEYSEGLPIYKEIKGRGPFSDEIAQYAVGAAVKYKLLPSVILSQYGYESAFGTSASARNDLNYFGITWFDGCLFPKGTARGIGGIEGGWYMKFPNSKAAFSYYGFMVATQSNFNACVGNKSPGASLLILGRGGYAAAGITEDSPYYTGCMSIITSNKLTEYDEFAIKHWGEGNNNNGTITGEWTNPFPGSSLDKSSFSGGQLFGTNPGGEFRPNGFHDGLDFGSVDHPGSEIHAVHGGKVVYVGNPGISGLGACVIVINYDGLNMVYQEFANSTGNSRVKVGDQVKVGQVIGIRDTAHLHLGFTRMDWRQAQGHAFTDDGTWIDPLPFLNSS…	ATGGAAAACAAAAATGAAAGTTTAATCAAGCAGTATGTTAAGCGTCGTGCAAAGCGACGCTTATTTTTGTGGTTGTTTGGTACTTCTGCAGGTTTGATTACTATTTTGATTACTGTGTTCGTGACCTTTTTTCTAATACTTGCGGCGGGTTCGATTGATAATTCTGATTCAGATTCAAGTAGTGGTGGCGAAGCTTTTACAGGAGAATATTCGGAAGGATTACCCATTTATAAAGAAATCAAAGGAAGAGGCCCTTTTTCTGATGAGATTGCGCAATATGCTGTAGGTGCAGCAGTGAAATATAAATTATTACCAAGTGTGATTCTTTCGCAATACGGTTATGAATCAGCGTTTGGTACGTCGGCGTCCGCAAGAAATGATCTCAACTATTTTGGGATT…
GCF_026183775.1	NZ_JAMYDK0100000381.5383.AOI_01	91.2;Enterocin_P	MRKKLFSLALIGIFGLVVTNFGTKVDAATRSYGNGVYCNNSKFWVNWGEAKENIAGIVISGWASGLAGMGN	ATGAGAAAAAAATTATTTAGTTTAGCTCTTATTGGAATATTTGGGTTAGTTGTGACAAATTTTGGTACAAAAGTTGATGCAGCTACGCGTTCATATGGTAATGGTGTTTATTGTAATAATAGTAAATTCTGGGTTAACTGGGGAGAAGCTAAAGAGAATATTGCAGGAATCGTTATTAGTGGCTGGGCTTCTGGTTTGGCAGGTATGGGAAAT
GCF_026183815.1	NZ_JAMYDM0100000311.5511.AOI_01	63.3;Enterolysin_A	MENQDESLIKQYVKRRAKRRLFLWLFGTSAGLITILITVFVTLFLILAAGSIDNSDSDSSSGGEAFTGEYSEGLPIYKEIKGRGPFSDEIAQYAVGAAVKYKLLPSVILSQYGYESAFGTSASARNDLNYFGITWFDGCLFPKGTARGIGGIEGGWYMKFPNSKAAFSYYGFMVATQSNFNACVGNKSPGASLLILGRGGYAAAGITEDSPYYTGCMSIITSNKLTEYDEFAMKHWGEGGNDNGTITGEWTNPFPGSSLDKSSFSGGQLFGTNPGGEFRPNGFHDGLDFGSVDHPGSEIHAVHVGKVVYVGNPGISGLGACVIVINYDGLNMVYQEFANSTGNSCVKVGDQVKVGQVIGIRDTAHLHLGFTRMDWRQAQGHAFTGDGTWIDPLPFLNSS…	ATGGAAAATCAAGATGAAAGTTTAATCAAGCAGTATGTTAAGCGTCGCGCAAAGCGGCGCTTATTTTTGTGGTTGTTTGGTACTTCTGCAGGTTTGATTACTATTTTGATCACTGTGTTTGTGACCCTATTTCTAATACTTGCGGCGGGTTCGATTGATAATTCGGATTCAGATTCAAGCAGTGGTGGCGAAGCTTTTACAGGAGAATATTCGGAAGGCTTACCGATTTATAAAGAAATCAAAGGAAGAGGCCCTTTTTCTGATGAGATTGCGCAATATGCCGTAGGTGCAGCAGTGAAATATAAATTATTACCAAGTGTGATTCTTTCGCAATACGGTTATGAGTCAGCGTTTGGTACGTCGGCGTCCGCAAGAAATGATCTCAACTATTTTGGGATT…
GCF_026183815.1	NZ_JAMYDM0100000431.5499.AOI_01	95.2;Enterocin_SE-K4	LILGIVLLSVSTLGITVDAATYYGNGVYCNTQKCWVDWSRARSEIVDRGVKAYVNGFTKVLGGVGGR	TTGATTTTAGGAATTGTTTTATTGAGTGTATCTACTTTAGGAATTACAGTAGATGCTGCAACTTATTATGGAAATGGTGTTTATTGTAATACTCAAAAATGTTGGGTAGATTGGAGTAGAGCTCGCTCTGAGATTGTTGATAGAGGAGTAAAAGCTTACGTTAATGGTTTTACGAAAGTGCTAGGTGGAGTCGGTGGAAGA
GCF_026183815.1	NZ_JAMYDM0100000581.5514.AOI_01	87.2;Enterocin_L50b	MGAIAKLVTKFGWPLIKKFYKQIMQFIGQGWTIDQIEKWLKRH	ATGGGAGCAATCGCAAAACTAGTGACAAAGTTTGGGTGGCCACTAATCAAAAAATTCTACAAACAAATCATGCAATTTATTGGACAAGGATGGACAATAGATCAAATTGAAAAATGGCTAAAAAGACAT
GCF_026183815.1	NZ_JAMYDM0100000581.5514.AOI_01	86.2;Enterocin_L50a	MNKKNDWRSYIMGAIAKLVAKFGWPIVKKYYKQIMQFIGEGWAINKIIEWIKKHI	ATGAACAAAAAAAATGATTGGAGGAGTTATATTATGGGAGCAATCGCAAAATTAGTAGCAAAGTTTGGGTGGCCTATTGTTAAAAAATATTACAAACAAATTATGCAGTTTATTGGAGAAGGATGGGCAATTAACAAAATCATTGAGTGGATTAAAAAACATATT
GCF_026183815.1	NZ_JAMYDM0100000831.5475.AOI_01	81.2;Enterocin_A	LRKKDCFMKEFKELSVKEMQQVQGGATHSGKYYGNGVYCTKEKCTVDWAKASTCIAGMSIGGFLGGAIPGKC	TTGAGAAAGAAGGATTGTTTTATGAAAGAATTTAAAGAATTGTCTGTAAAAGAAATGCAACAAGTTCAAGGTGGAGCTACTCACAGCGGTAAATATTATGGAAATGGTGTTTATTGTACTAAGGAGAAATGTACAGTTGACTGGGCTAAAGCTAGTACATGCATTGCAGGAATGTCTATTGGTGGTTTTTTAGGCGGAGCAATTCCTGGGAAGTGT
GCF_026183815.1	NZ_JAMYDM0100000881.5505.AOI_01	16.2;Bacteriocin_31	VKKKFVSIFMILGIVLLSVSTLGITVDAATYYGNGVYCNKQKCWVDWNKASKEIGKIIVNGWVQHGPWAPR	GTGAAGAAAAAATTTGTTAGTATTTTTATGATTTTAGGAATTGTTTTATTGAGTGTATCTACTTTAGGAATTACAGTAGATGCTGCAACTTATTATGGAAATGGTGTATATTGTAATAAACAAAAATGTTGGGTAGATTGGAATAAAGCTTCAAAAGAAATAGGAAAAATTATTGTTAATGGTTGGGTGCAACATGGACCTTGGGCTCCTAGA
GCF_026183815.1	NZ_JAMYDM0100000881.5505.AOI_01	51.2;Carnocin_CP52	MDKQQELLNLLSKAYNDPKINEYEGLKDKLFECASRLTNNEVNIGEVCYKLSTIISKYLVTHNFKITESIIELQNFVTKESQKYRGWASIGIWS	ATGGACAAGCAACAAGAATTACTGAATTTACTTAGTAAAGCGTATAATGATCCTAAAATAAATGAATACGAAGGGTTAAAAGATAAGTTATTTGAATGTGCAAGCAGATTAACAAATAACGAAGTAAATATCGGTGAAGTTTGTTATAAATTAAGTACAATTATCAGTAAATATCTAGTAACACATAATTTTAAAATAACTGAATCAATTATTGAATTGCAAAATTTTGTGACTAAAGAGAGCCAAAAATATAGGGGATGGGCGTCTATCGGTATTTGGAGT
GCF_026183815.1	NZ_JAMYDM0100000921.5473.AOI_01	14.2;Bac32	LKKTKLLVASLCLFSSLLAFTPSVSFSQNGGVVEAAAQRGYIYKKYPKGAKVPNKVKMLVNIRGKQTMRTCYLMSWTASSRTAKYYYYI	TTGAAAAAAACAAAATTATTGGTAGCTAGTTTGTGTTTGTTTAGCAGTTTATTAGCTTTCACCCCTTCTGTTTCATTTTCTCAAAATGGTGGAGTGGTTGAAGCTGCTGCTCAAAGAGGATATATCTACAAAAAATATCCAAAAGGTGCTAAAGTGCCAAATAAAGTTAAAATGTTAGTAAATATTAGAGGTAAACAAACTATGCGTACTTGTTACCTTATGAGTTGGACTGCTAGTAGTAGAACAGCCAAATATTATTACTACATT
GCF_026183835.1	NZ_JAMYDN0100000311.5600.AOI_01	63.3;Enterolysin_A	MENQDESLIKQYVKRRAKRRLFLWLFGTSAGLITILITVFVTLFLILAAGSIDNSDSDSSSGGEAFTGEYSEGLPIYKEIKGRGPFSDEIAQYAVGAAVKYKLLPSVILSQYGYESAFGTSASARNDLNYFGITWFDGCLFPKGTARGIGGIEGGWYMKFPNSKAAFSYYGFMVATQSNFNACVGNKSPGASLLILGRGGYAAAGITEDSPYYTGCMSIITSNKLTEYDEFAMKHWGEGGNDNGTITGEWTNPFPGSSLDKSSFSGGQLFGTNPGGEFRPNGFHDGLDFGSVDHPGSEIHAVHVGKVVYVGNPGISGLGACVIVINYDGLNMVYQEFANSTGNSCVKVGDQVKVGQVIGIRDTAHLHLGFTRMDWRQAQGHAFTGDGTWIDPLPFLNSS…	ATGGAAAATCAAGATGAAAGTTTAATCAAGCAGTATGTTAAGCGTCGCGCAAAGCGGCGCTTATTTTTGTGGTTGTTTGGTACTTCTGCAGGTTTGATTACTATTTTGATCACTGTGTTTGTGACCCTATTTCTAATACTTGCGGCGGGTTCGATTGATAATTCGGATTCAGATTCAAGCAGTGGTGGCGAAGCTTTTACAGGAGAATATTCGGAAGGCTTACCGATTTATAAAGAAATCAAAGGAAGAGGCCCTTTTTCTGATGAGATTGCGCAATATGCCGTAGGTGCAGCAGTGAAATATAAATTATTACCAAGTGTGATTCTTTCGCAATACGGTTATGAGTCAGCGTTTGGTACGTCGGCGTCCGCAAGAAATGATCTCAACTATTTTGGGATT…
GCF_026183835.1	NZ_JAMYDN0100000431.5609.AOI_01	95.2;Enterocin_SE-K4	LILGIVLLSVSTLGITVDAATYYGNGVYCNTQKCWVDWSRARSEIVDRGVKAYVNGFTKVLGGVGGR	TTGATTTTAGGAATTGTTTTATTGAGTGTATCTACTTTAGGAATTACAGTAGATGCTGCAACTTATTATGGAAATGGTGTTTATTGTAATACTCAAAAATGTTGGGTAGATTGGAGTAGAGCTCGCTCTGAGATTGTTGATAGAGGAGTAAAAGCTTACGTTAATGGTTTTACGAAAGTGCTAGGTGGAGTCGGTGGAAGA
GCF_026183835.1	NZ_JAMYDN0100000581.5598.AOI_01	87.2;Enterocin_L50b	MGAIAKLVTKFGWPLIKKFYKQIMQFIGQGWTIDQIEKWLKRH	ATGGGAGCAATCGCAAAACTAGTGACAAAGTTTGGGTGGCCACTAATCAAAAAATTCTACAAACAAATCATGCAATTTATTGGACAAGGATGGACAATAGATCAAATTGAAAAATGGCTAAAAAGACAT
GCF_026183835.1	NZ_JAMYDN0100000581.5598.AOI_01	86.2;Enterocin_L50a	MNKKNDWRSYIMGAIAKLVAKFGWPIVKKYYKQIMQFIGEGWAINKIIEWIKKHI	ATGAACAAAAAAAATGATTGGAGGAGTTATATTATGGGAGCAATCGCAAAATTAGTAGCAAAGTTTGGGTGGCCTATTGTTAAAAAATATTACAAACAAATTATGCAGTTTATTGGAGAAGGATGGGCAATTAACAAAATCATTGAGTGGATTAAAAAACATATT
GCF_026183835.1	NZ_JAMYDN0100000831.5551.AOI_01	81.2;Enterocin_A	LRKKDCFMKEFKELSVKEMQQVQGGATHSGKYYGNGVYCTKEKCTVDWAKASTCIAGMSIGGFLGGAIPGKC	TTGAGAAAGAAGGATTGTTTTATGAAAGAATTTAAAGAATTGTCTGTAAAAGAAATGCAACAAGTTCAAGGTGGAGCTACTCACAGCGGTAAATATTATGGAAATGGTGTTTATTGTACTAAGGAGAAATGTACAGTTGACTGGGCTAAAGCTAGTACATGCATTGCAGGAATGTCTATTGGTGGTTTTTTAGGCGGAGCAATTCCTGGGAAGTGT
GCF_026183835.1	NZ_JAMYDN0100000881.5592.AOI_01	16.2;Bacteriocin_31	VKKKFVSIFMILGIVLLSVSTLGITVDAATYYGNGVYCNKQKCWVDWNKASKEIGKIIVNGWVQHGPWAPR	GTGAAGAAAAAATTTGTTAGTATTTTTATGATTTTAGGAATTGTTTTATTGAGTGTATCTACTTTAGGAATTACAGTAGATGCTGCAACTTATTATGGAAATGGTGTATATTGTAATAAACAAAAATGTTGGGTAGATTGGAATAAAGCTTCAAAAGAAATAGGAAAAATTATTGTTAATGGTTGGGTGCAACATGGACCTTGGGCTCCTAGA
GCF_026183835.1	NZ_JAMYDN0100000881.5592.AOI_01	51.2;Carnocin_CP52	MDKQQELLNLLSKAYNDPKINEYEGLKDKLFECASRLTNNEVNIGEVCYKLSTIISKYLVTHNFKITESIIELQNFVTKESQKYRGWASIGIWS	ATGGACAAGCAACAAGAATTACTGAATTTACTTAGTAAAGCGTATAATGATCCTAAAATAAATGAATACGAAGGGTTAAAAGATAAGTTATTTGAATGTGCAAGCAGATTAACAAATAACGAAGTAAATATCGGTGAAGTTTGTTATAAATTAAGTACAATTATCAGTAAATATCTAGTAACACATAATTTTAAAATAACTGAATCAATTATTGAATTGCAAAATTTTGTGACTAAAGAGAGCCAAAAATATAGGGGATGGGCGTCTATCGGTATTTGGAGT
GCF_026183835.1	NZ_JAMYDN0100000921.5549.AOI_01	14.2;Bac32	LKKTKLLVASLCLFSSLLAFTPSVSFSQNGGVVEAAAQRGYIYKKYPKGAKVPNKVKMLVNIRGKQTMRTCYLMSWTASSRTAKYYYYI	TTGAAAAAAACAAAATTATTGGTAGCTAGTTTGTGTTTGTTTAGCAGTTTATTAGCTTTCACCCCTTCTGTTTCATTTTCTCAAAATGGTGGAGTGGTTGAAGCTGCTGCTCAAAGAGGATATATCTACAAAAAATATCCAAAAGGTGCTAAAGTGCCAAATAAAGTTAAAATGTTAGTAAATATTAGAGGTAAACAAACTATGCGTACTTGTTACCTTATGAGTTGGACTGCTAGTAGTAGAACAGCCAAATATTATTACTACATT
GCF_026183755.1	NZ_JANDLX0100000211.5351.AOI_01	63.3;Enterolysin_A	MENQDESLIKQYVKRRAKRRLFLWLFGTSAGLITILITVFVTLFLILAAGSIDNSDSDSSSGGEAFTGEYSEGLPIYKEIKGRGPFSDEIAQYAVGAAVKYKLLPSVILSQYGYESAFGTSASARNDLNYFGITWFDGCLFPKGTARGIGGIEGGWYMKFPNSKAAFSYYGFMVATQSNFNACVGNKSPGASLLILGRGGYAAAGITEDSPYYTGCMSIITSNKLTEYDEFAMKHWGEGGNDNGTITGEWTNPFPGSSLDKSSFSGGQLFGTNPGGEFRPNGFHDGLDFGSVDHPGSEIHAVHGGKVVYVGNPGISGLGACVIVINYDGLNMVYQEFANSTGNSCVKVGDQVKVGQVIGIRDTAHLHLGFTRMDWRQAQGHAFTGDGTWIDPLPFLNSS…	ATGGAAAATCAAGATGAAAGTTTAATCAAGCAGTATGTTAAGCGTCGCGCAAAGCGGCGCTTATTTTTGTGGTTGTTTGGTACTTCTGCAGGTTTGATTACTATTTTGATCACTGTGTTTGTGACCCTATTTCTAATACTTGCGGCGGGTTCGATTGATAATTCGGATTCAGATTCAAGCAGTGGTGGCGAAGCTTTTACAGGAGAATATTCGGAAGGCTTACCGATTTATAAAGAAATCAAAGGAAGAGGCCCTTTTTCTGATGAGATTGCGCAATATGCCGTAGGTGCAGCAGTGAAATATAAATTATTACCAAGTGTGATTCTTTCGCAATACGGTTATGAGTCAGCGTTTGGTACGTCGGCGTCCGCAAGAAATGATCTCAACTATTTTGGGATT…
GCF_026183755.1	NZ_JANDLX0100000211.5351.AOI_02	95.2;Enterocin_SE-K4	LILGIVLLSVSTLGITVDAATYYGNGVYCNTQKCWVDWSRARSEIVDRGVKAYVNGFTKVLGGVGGR	TTGATTTTAGGAATTGTTTTATTGAGTGTATCTACTTTAGGAATTACAGTAGATGCTGCAACTTATTATGGAAATGGTGTTTATTGTAATACTCAAAAATGTTGGGTAGATTGGAGTAGAGCTCGCTCTGAGATTGTTGATAGAGGAGTAAAAGCTTACGTTAATGGTTTTACGAAAGTGCTAGGTGGAGTCGGTGGAAGA
GCF_026183755.1	NZ_JANDLX0100000451.5354.AOI_01	51.2;Carnocin_CP52	MDKQQELLNLLSKAYNDPKINEYEGLKDKLFECASRLTNNEVNIGEVCYKLSTIISKYLVTHNFKITESIIELQNFVTKESQKYRGWASIGIWS	ATGGACAAGCAACAAGAATTACTGAATTTACTTAGTAAAGCGTATAATGATCCTAAAATAAATGAATACGAAGGGTTAAAAGATAAGTTATTTGAATGTGCAAGCAGATTAACAAATAACGAAGTAAATATCGGTGAAGTTTGTTATAAATTAAGTACAATTATCAGTAAATATCTAGTAACACATAATTTTAAAATAACTGAATCAATTATTGAATTGCAAAATTTTGTGACTAAAGAGAGCCAAAAATATAGGGGATGGGCGTCTATCGGTATTTGGAGT
GCF_026183755.1	NZ_JANDLX0100000451.5354.AOI_01	16.2;Bacteriocin_31	VKKKFVSIFMILGIVLLSVSTLGITVDAATYYGNGVYCNKQKCWVDWNKASKEIGKIIVNGWVQHGPWAPR	GTGAAGAAAAAATTTGTTAGTATTTTTATGATTTTAGGAATTGTTTTATTGAGTGTATCTACTTTAGGAATTACAGTAGATGCTGCAACTTATTATGGAAATGGTGTATATTGTAATAAACAAAAATGTTGGGTAGATTGGAATAAAGCTTCAAAAGAAATAGGAAAAATTATTGTTAATGGTTGGGTGCAACATGGACCTTGGGCTCCTAGA
GCF_027925885.1	NZ_JANQBE0100000201.8765.AOI_01	95.2;Enterocin_SE-K4	LILGIVLLSVSTLGITVDAATYYGNGVYCNTQKCWVDWSRARSEIVDRGVKAYVNGFTKVLGGVGGR	TTGATTTTAGGAATTGTTTTATTGAGTGTATCTACTTTAGGAATTACAGTAGATGCTGCAACTTATTATGGAAATGGTGTTTATTGTAATACTCAAAAATGTTGGGTAGATTGGAGTAGAGCTCGCTCTGAGATTGTTGATAGAGGAGTAAAAGCTTACGTTAATGGTTTTACGAAAGTGCTAGGTGGAGTCGGTGGAAGA
GCF_027925885.1	NZ_JANQBE0100000241.8792.AOI_01	14.2;Bac32	LKKTKLLVASLCLFSSLLAFTPSVSFSQNGGVVEAAAQRGYIYKKYPKGAKVPNKVKMLVNIRGKQTMRTCYLMSWTASSRTAKYYYYI	TTGAAAAAAACAAAATTATTGGTAGCTAGTTTGTGTTTGTTTAGCAGTTTATTAGCTTTCACCCCTTCTGTTTCATTTTCTCAAAATGGTGGAGTGGTTGAAGCTGCTGCTCAAAGAGGATATATCTACAAAAAATATCCAAAAGGTGCTAAAGTGCCAAATAAAGTTAAAATGTTAGTAAATATTAGAGGTAAACAAACTATGCGTACTTGTTACCTTATGAGTTGGACTGCTAGTAGTAGAACAGCCAAATATTATTACTACATT
GCF_027925885.1	NZ_JANQBE0100000241.8792.AOI_01	93.2;Enterocin_Q	MNFLKNGIAKWMTGAELQAYKKKYGCLPWEKISCx	ATGAATTTTCTTAAAAATGGTATCGCAAAATGGATGACCGGTGCTGAATTGCAAGCGTATAAAAAGAAATATGGATGCTTGCCATGGGAAAAAATTTCTTGTTAA
GCF_027925885.1	NZ_JANQBE0100000261.8779.AOI_01	76.2;EJ97enterocin	VISMKFKFNPTGTIVKKLTQYEIAWFKNKHGYYPWEIPRC	GTGATTTCCATGAAATTTAAATTTAATCCCACAGGAACCATCGTAAAAAAATTAACTCAATATGAAATAGCATGGTTCAAAAATAAACATGGATACTATCCATGGGAAATTCCTAGATGC
GCF_027925905.1	NZ_JANQBF0100000221.8818.AOI_01	63.3;Enterolysin_A	MENQNESLIKQYVKRRAKRRLFLWLFGTSAGLITILITVFVTLFLILAAGSIDHSDSDSSSGGDAFTGEYSEGLPIYKEIKGRGPFSDEIAQYAVGAAVKYKLLPSVILSQYGYESAFGTSASARNDLNYFGITWFDGCLFPKGTARGIGGIEGGWYMKFPNSKAAFSYYGFMVATQSNFNACVGNKSPGASLLILGRGGYAAAGITEDSPYYTGCMSIITSNKLTEYDEFAMKHWGEGGNDNGTITGEWTNPFPGSSLDKSSFSGGQLFGTNPGGEFRPNGFHDGLDFGSVDHPGSEIHAVHGGKVVYVGNPGISGLGACVIVINYDGLNMVYQEFANSTGNSRVKVGDQVKVGQVIGIRDTAHLHLGFTRMDWRQAQGHAFTDDGTWIDPLPFLNSS…	ATGGAAAACCAAAATGAAAGTTTAATCAAGCAGTATGTTAAGCGTCGTGCAAAGCGACGCTTATTTTTGTGGTTGTTTGGTACTTCTGCAGGTTTGATTACTATTTTGATTACTGTGTTCGTGACCCTTTTTCTAATACTTGCGGCGGGTTCGATTGATCATTCTGATTCAGATTCAAGTAGTGGTGGCGACGCTTTTACAGGAGAATATTCGGAAGGATTACCCATTTATAAAGAAATCAAAGGAAGAGGCCCTTTTTCTGATGAGATTGCGCAATATGCTGTAGGTGCAGCAGTGAAATATAAATTATTACCAAGTGTGATCCTTTCGCAATACGGTTATGAATCAGCGTTTGGTACATCGGCGTCCGCAAGAAATGATCTCAACTATTTTGGGATT…
GCF_028613905.1	NZ_JAPVXE0100000361.8888.AOI_01	86.2;Enterocin_L50a	VIYNYYEQKNDWRSYIMGAIAKLVAKFGWPIVKKYYKQIMQFIGEGWAINKIIEWIKKHI	GTGATATACAATTATTATGAACAAAAAAATGATTGGAGGAGTTATATTATGGGAGCAATCGCAAAATTAGTAGCAAAGTTTGGGTGGCCTATTGTTAAAAAGTATTACAAACAAATTATGCAGTTTATTGGAGAAGGATGGGCAATTAACAAAATCATTGAGTGGATTAAAAAACATATT
GCF_028613905.1	NZ_JAPVXE0100000361.8888.AOI_01	87.2;Enterocin_L50b	MGAIAKLVTKFGWPLIKKFYKQIMQFIGQGWTIDQIEKWLKRH	ATGGGAGCAATCGCAAAACTAGTGACAAAGTTTGGGTGGCCACTAATCAAAAAATTCTACAAACAAATCATGCAATTTATTGGACAAGGATGGACAATAGATCAAATTGAAAAATGGCTAAAAAGACAT
GCF_027688035.1	NZ_JAQCPP0100000261.8318.AOI_01	63.3;Enterolysin_A	MENQNESLIKQYVKRRAKRRLFLWLFGTSAGLITILITVFVTLFLILAAGSIDNSDSDSSSGGEAFTGEYSEGLPIYKEIKGRGPFSDEIAQYAVGAAVKYKLLPSVILSQYGYESAFGTSASARNDLNYFGITWFDGCLFPKGTARGIGGIEGGWYMKFPNSKATFSYYGFMVATQSNFNACVGNKSPGASLLILGRGGYAAAGITEDSPYYTGCMSIITSNKLTEYDEFAIKHWGEGGNNNGTITGEWTNPFPGSSLDKSSFSGGQLFGTNPGGEFRPNGFHDGLDFGSVDHQGSEIHAVHGGKVVYVGNPGISGLGACVIVINYDGLNMVYQEFANSTGNSRVKVGDQVKVGQVIGIRDTAHLHLGFTRMDWRQAQGHAFTGDGTWIDPLPFLNSS…	ATGGAAAACCAAAATGAAAGTTTAATCAAGCAGTATGTTAAGCGTCGTGCAAAGCGACGCTTATTTTTGTGGTTGTTTGGTACTTCTGCAGGTTTGATTACTATTTTGATTACTGTGTTCGTGACCCTTTTTCTAATACTTGCGGCGGGTTCGATTGATAATTCTGATTCAGATTCAAGTAGTGGTGGCGAAGCTTTTACAGGAGAATATTCGGAAGGATTACCCATTTATAAAGAAATCAAAGGAAGAGGCCCTTTTTCTGATGAGATTGCGCAATATGCCGTAGGTGCAGCAGTGAAGTATAAATTATTACCAAGTGTGATCCTTTCGCAATACGGGTATGAATCAGCGTTTGGTACGTCGGCGTCTGCAAGAAATGATCTCAATTATTTTGGGATT…
GCF_027688035.1	NZ_JAQCPP0100000411.8330.AOI_01	91.2;Enterocin_P	MRKKLFSLALIGIFGLVVTNFGTKVDAATRSYGNGVYCNNSKCWVNWGEAKENIAGIVISGWASGLAGMGH	ATGAGAAAAAAATTATTTAGTTTAGCTCTTATTGGAATATTTGGGTTAGTTGTGACAAATTTTGGTACAAAAGTTGATGCAGCTACGCGTTCATATGGTAATGGTGTTTATTGTAATAATAGTAAATGCTGGGTTAACTGGGGAGAAGCTAAAGAGAATATTGCAGGAATCGTTATTAGTGGCTGGGCTTCTGGTTTGGCAGGTATGGGACAT
GCF_027687855.1	NZ_JAQCPZ0100000231.8246.AOI_01	63.3;Enterolysin_A	MENQNESLIKQYVKRRAKRRLFLWLFGTSAGLITILITVFVTLFLILAAGSIDNSDSDSSSGGEAFTGEYSEGLPIYKEIKGRGPFSDEIAQYAVGAAVKYKLLPSVILSQYGYESAFGTSASARNDLNYFGITWFDGCLFPKGTARGIGGIEGGWYMKFPNSKATFSYYGFMVATQSNFNACVGNKSPGASLLILGRGGYAAAGITEDSPYYTGCMSIITSNKLTEYDEFAIKHWGEGGNNNGTITGEWTNPFPGSSLDKSSFSGGQLFGTNPGGEFRPNGFHDGLDFGSVDHQGSEIHAVHGGKVVYVGNPGISGLGACVIVINYDGLNMVYQEFANSTGNSRVKVGDQVKVGQVIGIRDTAHLHLGFTRMDWRQAQGHAFTGDGTWIDPLPFLNSS…	ATGGAAAACCAAAATGAAAGTTTAATCAAGCAGTATGTTAAGCGTCGTGCAAAGCGACGCTTATTTTTGTGGTTGTTTGGTACTTCTGCAGGTTTGATTACTATTTTGATTACTGTGTTCGTGACCCTTTTTCTAATACTTGCGGCGGGTTCGATTGATAATTCTGATTCAGATTCAAGTAGTGGTGGCGAAGCTTTTACAGGAGAATATTCGGAAGGATTACCCATTTATAAAGAAATCAAAGGAAGAGGCCCTTTTTCTGATGAGATTGCGCAATATGCCGTAGGTGCAGCAGTGAAGTATAAATTATTACCAAGTGTGATCCTTTCGCAATACGGGTATGAATCAGCGTTTGGTACGTCGGCGTCTGCAAGAAATGATCTCAATTATTTTGGGATT…
GCF_027687855.1	NZ_JAQCPZ0100000391.8273.AOI_01	91.2;Enterocin_P	MRKKLFSLALIGIFGLVVTNFGTKVDAATRSYGNGVYCNNSKCWVNWGEAKENIAGIVISGWASGLAGMGH	ATGAGAAAAAAATTATTTAGTTTAGCTCTTATTGGAATATTTGGGTTAGTTGTGACAAATTTTGGTACAAAAGTTGATGCAGCTACGCGTTCATATGGTAATGGTGTTTATTGTAATAATAGTAAATGCTGGGTTAACTGGGGAGAAGCTAAAGAGAATATTGCAGGAATCGTTATTAGTGGCTGGGCTTCTGGTTTGGCAGGTATGGGACAT
GCF_027687325.1	NZ_JAQCQZ0100000231.8214.AOI_01	95.2;Enterocin_SE-K4	LILGIVLLSVSTLGITVDAATYYGNGVYCNTQKCWVDWSRARSEIVDRGVKAYVNGFTKVLGGVGGR	TTGATTTTAGGAATTGTTTTATTGAGTGTATCTACTTTAGGAATTACAGTAGATGCTGCAACTTATTATGGAAATGGTGTTTATTGTAATACTCAAAAATGTTGGGTAGATTGGAGTAGAGCTCGCTCTGAGATTGTTGATAGAGGAGTAAAAGCTTACGTTAATGGTTTTACGAAAGTGCTAGGTGGAGTCGGTGGAAGA
GCF_027687325.1	NZ_JAQCQZ0100000231.8214.AOI_02	63.3;Enterolysin_A	MENQNESLIKQYVKRRAKRRLFLWLSGTSAGLITILITVFVTLFLILAAGSIDNSDSDSSSGGETFTGEYSEGLPIYKEIKGRGPFSDEIAQYAVGAAVKYKLLPSVILSQYGYESAFGTSASARNDLNYFGITWFDGCLFPKGTARGIGGIEGGWYMKFPNSKAAFSYYGFMVATQSNFNACVGNKSPGASLLILGRGGYAAAGITEDSPYYTGCMSIITSNKLTEYDEFAIKHWGEGGNNNGTITGEWTNPFPGSSLDKSSFSGGQLFGTNPGGEFRPNGFHDGLDFGSVDHQGSEIHAVHGGKVVYVGNPGISGLGACVIVINYDGLNMVYQEFANSTGNSRVKVGDQVKVGQVIGIRDTAHLHLGFTRMDWRQAQGHAFTGDGTWIDPLPFLNSS…	ATGGAAAACCAAAATGAAAGTTTAATCAAGCAGTATGTTAAGCGTCGTGCAAAGCGACGCTTATTTTTGTGGTTGTCTGGTACTTCTGCAGGTTTGATTACCATTTTGATCACTGTATTCGTGACCCTATTTTTAATACTTGCGGCTGGTTCGATTGATAATTCTGATTCAGATTCAAGCAGTGGTGGCGAAACTTTTACAGGAGAGTATTCGGAAGGATTGCCCATTTATAAAGAAATCAAAGGAAGAGGCCCTTTTTCTGATGAGATTGCGCAATATGCCGTAGGTGCAGCAGTGAAGTATAAATTATTACCAAGTGTGATCCTTTCGCAATACGGGTATGAATCAGCGTTTGGTACGTCGGCGTCTGCAAGAAATGATCTCAATTATTTTGGGATT…
GCF_027687325.1	NZ_JAQCQZ0100000391.8244.AOI_01	91.2;Enterocin_P	MRKKLFSLTLIGKFGLVVTNFGTKVDAATRSYGNGVYCSNSKCWVNWGEAKENIAGIVISGWASGLAGMGH	ATGAGAAAAAAATTATTTAGTTTAACTCTTATTGGAAAGTTTGGATTAGTTGTGACGAATTTTGGTACAAAAGTTGATGCAGCTACGCGTTCATATGGTAATGGTGTTTATTGTAGTAATAGTAAGTGCTGGGTTAACTGGGGAGAAGCTAAAGAAAATATTGCAGGAATTGTTATTAGTGGCTGGGCTTCTGGCTTGGCAGGTATGGGACAT
GCF_027687325.1	NZ_JAQCQZ0100000581.8239.AOI_01	95.2;Enterocin_SE-K4	MKKKLVKGSVICSMIGIGFIVIGTNVEAATYYGNGVYCNKQKCWVNWGQAWSKGVKRWGDNLFGSFSGGRI	ATGAAAAAGAAATTAGTTAAAGGCTCAGTTATTTGTAGCATGATTGGGATTGGTTTTATAGTAATAGGAACAAATGTAGAAGCTGCCACGTATTACGGAAATGGTGTGTATTGTAATAAGCAAAAATGTTGGGTAAATTGGGGACAAGCTTGGTCAAAAGGGGTTAAACGTTGGGGAGATAATTTGTTTGGTAGTTTTAGTGGAGGAAGGATT
GCF_027687255.1	NZ_JAQCRB0100000241.8138.AOI_01	63.3;Enterolysin_A	MENQNESLIKQYVKRRAKRRLFLWLFGTSAGLITILITVFVTLFLILAAGSIDNSDSDSSSGGETFTGEYSEGLPIYKEIKGRGPFSDEIAQYAVGAAVKYKLLPSVILSQYGYESAFGTSASARNDLNYFGITWFDGCLFPKGTARGIGGIEGGWYMKFPNSKAAFSYYGFMVATQSNFNACVGNKSPGASLLILGRGGYAASGITEDSPYYIGCMSIITSNKLTEYDEFAIKHWGEGGNNNGTITGEWTNPFPGSSLDKSSFSGGQLFGTNPGGEFRPNGFHDGLDFGSVDHPGSEIHAVHVGKVVYVGNPGISGLGACVIVINYDGLNMVYQEFANSTGNSCVKVGDQVKVGQVIGIRDTAHLHLGFTRMDWRQAQGHAFTGDGTWIDPLPFLNSS…	ATGGAAAACCAAAATGAAAGTTTAATCAAGCAGTATGTTAAGCGTCGTGCAAAGCGACGCTTATTTTTGTGGTTGTTTGGTACTTCTGCAGGTTTGATTACCATTTTGATCACTGTATTCGTGACCCTATTTTTAATACTTGCGGCTGGTTCGATTGATAATTCGGATTCAGATTCAAGCAGTGGTGGCGAAACTTTTACAGGAGAGTATTCGGAAGGATTGCCCATTTATAAAGAAATCAAAGGAAGAGGCCCTTTTTCTGATGAGATTGCGCAATATGCCGTAGGTGCAGCAGTGAAATATAAATTATTACCAAGTGTAATCCTTTCTCAATACGGTTACGAATCAGCGTTTGGTACGTCGGCGTCCGCAAGAAATGATCTCAACTATTTTGGAATT…
GCF_027687255.1	NZ_JAQCRB0100000611.8185.AOI_01	22.2;Bacteriocin_T8	MKKKVLKHCVILGILGTCLAGIGTGIKVDAATYYGNGLYCNKEKCWVDWNQAKGEIGKIIVNGWVNHGPWAPRR	ATGAAAAAGAAAGTATTAAAACATTGTGTTATTCTAGGAATATTAGGAACTTGTCTAGCTGGCATCGGTACAGGAATAAAAGTTGATGCAGCTACTTACTATGGAAATGGTCTTTATTGTAACAAAGAAAAATGTTGGGTAGATTGGAATCAAGCTAAAGGAGAAATTGGAAAAATTATTGTTAATGGTTGGGTTAATCATGGTCCATGGGCACCTAGAAGG
GCF_027687175.1	NZ_JAQCRF0100000151.8112.AOI_01	95.2;Enterocin_SE-K4	LILGIVLLSVSTLGITVDAATYYGNGVYCNTQKCWVDWSRARSEIVDRGVKAYVNGFTKVLGGVGGR	TTGATTTTAGGAATTGTTTTATTGAGTGTATCTACTTTAGGAATTACAGTAGATGCTGCAACTTATTATGGAAATGGTGTTTATTGTAATACTCAAAAATGTTGGGTAGATTGGAGTAGAGCTCGCTCTGAGATTGTTGATAGAGGAGTAAAAGCTTACGTTAATGGTTTTACGAAAGTGCTAGGTGGAGTCGGTGGAAGA
GCF_027687175.1	NZ_JAQCRF0100000151.8112.AOI_02	63.3;Enterolysin_A	MENQDESLIKQYVKRRAKRRLFLWLFGTSAGLITILITVFVTLFLILAAGSIDNSDSDSSSGGETFTGEYSEGLPIYKEIKGRGPFSDEIAQYAVGAAVKYKLLPSVILSQYGYESAFGTSASARNDLNYFGITWFDGCLFPKGTARGIGGIEGGWYMKFPNSKAAFSYYGFMVATQSNFNACVGNKSPGASLLILGRGGYAAAGITEDSPYYTGCMSIITSNKLTEYDEFAIKHWGEGGNNNGTITGEWTNPFPGSSLDKSSFSGGQLFGTNPGGEFRPNGFHDGLDFGSVDHPGSEIHAVHVGKVVYVGNPGISGLGACVIVINYDGLNMVYQEFANSTGNSCVKVGDQVKVGQVIGIRDTAHLHLGFTRMDWRQAQGHAFTGDGTWIDPLPFLNSS…	ATGGAAAATCAAGATGAAAGTTTAATCAAGCAGTATGTTAAGCGTCGCGCAAAGCGGCGCTTATTTTTGTGGTTGTTTGGTACTTCTGCAGGTTTGATTACCATTTTGATCACTGTATTCGTGACCCTATTTTTAATACTTGCGGCTGGTTCGATTGATAATTCGGATTCAGATTCAAGCAGTGGTGGCGAAACTTTTACAGGAGAGTATTCGGAAGGATTGCCCATTTATAAAGAAATCAAAGGAAGAGGCCCTTTTTCTGATGAGATTGCGCAATATGCCGTAGGTGCAGCAGTGAAATATAAATTATTACCAAGTGTAATCCTTTCTCAATACGGTTACGAATCAGCGTTTGGTACGTCGGCGTCCGCAAGAAATGATCTCAACTATTTTGGAATT…
GCF_027687165.1	NZ_JAQCRG0100000201.8047.AOI_01	63.3;Enterolysin_A	MENQDESLIKQYVKRRAKRRLFLWLFGTSAGLITILITVFVTLFLILAAGSIDNSDSDSSSGGEAFTGEYSEGLPIYKEIKGRGPFSDEIAQYAVGAAVKYKLLPSVILSQYGYESAFGTSASARNDLNYFGITWFDGCLFPKGTARGIGGIEGGWYMKFPNSKAAFSYYGFMVATQSNFNACVGNKSPGASLLILGRGGYAAAGITEDSPYYTGCMSIITSNKLTEYDEFAMKHWGEGGNDNGTITGEWTNPFPGSSLDKSSFSGGQLFGTNPGGEFRPNGFHDGLDFGSVDHPGSEIHAVHVGKVVYVGNPGISGLGACVIVINYDGLNMVYQEFANSTGNSCVKVGDQVKVGQVIGIRDTAHLHLGFTRMDWRQAQGHAFTGDGTWIDPLPFLNSS…	ATGGAAAATCAAGATGAAAGTTTAATCAAGCAGTATGTTAAGCGTCGCGCAAAGCGGCGCTTATTTTTGTGGTTGTTTGGTACTTCTGCAGGTTTGATTACTATTTTGATCACTGTGTTTGTGACCCTATTTCTAATACTTGCGGCGGGTTCGATTGATAATTCGGATTCAGATTCAAGCAGTGGTGGCGAAGCTTTTACAGGAGAATATTCGGAAGGCTTACCGATTTATAAAGAAATCAAAGGAAGAGGCCCTTTTTCTGATGAGATTGCGCAATATGCCGTAGGTGCAGCAGTGAAATATAAATTATTACCAAGTGTGATTCTTTCGCAATACGGTTATGAGTCAGCGTTTGGTACGTCGGCGTCCGCAAGAAATGATCTCAACTATTTTGGGATT…
GCF_027686015.1	NZ_JAQCTL0100000241.7850.AOI_01	63.3;Enterolysin_A	MENQDESLIKQYVKRRAKRRLFLWLFGTSAGLITILITVFVTLFLILAAGSIDNSDSDSSSGGETFTGEYSEGLPIYKEIKGRGPFSDEIAQYAVGAAVKYKLLPSVILSQYGYESAFGTSASARNDLNYFGITWFDGCLFPKGTARGIGGIEGGWYMKFPNSKAAFSYYGFMVATQSNFNACVGNKSPGASLLILGRGGYAAAGITGDSPYYTGCMSIITSNKLTEYDEFAIKHWGEGGNNNGTITGEWTNPFPGSSLDKSSFSGGQLFGTNPGGEFRPNGFHDGLDFGSVDHPGSEIHAVHVGKVVYVGNPGISGLGACVIVINYDGLNMVYQEFANSTGNSCVKVGDQVKVGQVIGIRDTAHLHLGFTRMDWRQAQGHAFTGDGTWIDPLPFLNSS…	ATGGAAAATCAAGATGAAAGTTTAATCAAGCAGTATGTTAAGCGTCGCGCAAAGCGGCGCTTATTTTTGTGGTTGTTTGGTACTTCTGCAGGTTTGATTACCATTTTGATCACTGTATTCGTGACCCTATTTTTAATACTTGCGGCTGGTTCGATTGATAATTCGGATTCAGATTCAAGCAGTGGTGGCGAAACTTTTACAGGAGAGTATTCGGAAGGATTGCCCATTTATAAAGAAATCAAAGGAAGAGGCCCTTTTTCTGATGAGATTGCGCAATATGCCGTAGGTGCAGCAGTGAAATATAAATTATTACCAAGTGTAATCCTTTCTCAATACGGTTACGAATCAGCGTTTGGTACGTCGGCGTCCGCAAGAAATGATCTCAACTATTTTGGAATT…
GCF_027685895.1	NZ_JAQCTO0100000221.7799.AOI_01	63.3;Enterolysin_A	MENQDESLIKQYVKRRAKRRLFLWLFGTSAGLITILITVFVTLFLILAAGSIDNSDSDSSSGGEAFTGEYSEGLPIYKEIKGRGPFSDEIAQYAVGAAVKYKLLPSVILSQYGYESAFGTSASARNDLNYFGITWFDGCLFPKGTARGIGGIEGGWYMKFPNSKAAFSYYGFMVATQSNFNASVGNKSPGASLLILGRGGYAAAGITEDSPYYTGCMSIITSNKLTEYDEFAIKHWGEGGNDNGTITGEWTNPFPGSSLDKSSFSGGQLFGTNPGGEFRPNGFHDGLDFGSVDHPGSEIHAVHGGKVVYVGNPGISGLGACVIVINYDGLNMVYQEFANSTGNSRVKVGDQVKVGQVIGIRDTAHLHLGFTRMDWRQAQGHAFTDDGTWIDPLPFLNSS…	ATGGAAAATCAAGATGAAAGTTTAATCAAGCAGTATGTTAAGCGTCGCGCAAAGCGGCGCTTATTTTTGTGGTTGTTTGGTACTTCTGCAGGTTTGATTACTATTTTGATCACTGTGTTTGTGACCCTATTTCTAATACTTGCGGCGGGTTCGATTGATAATTCGGATTCAGATTCAAGCAGTGGTGGCGAAGCTTTTACAGGAGAATATTCGGAAGGCTTACCGATTTATAAAGAAATCAAAGGAAGAGGCCCTTTTTCTGATGAGATTGCGCAATATGCCGTAGGTGCAGCAGTGAAATATAAATTATTACCAAGTGTGATTCTTTCGCAATACGGTTATGAGTCAGCGTTTGGTACGTCGGCGTCCGCAAGAAATGATCTCAACTATTTTGGGATT…
GCF_027684345.1	NZ_JAQCWI0100000251.7777.AOI_01	63.3;Enterolysin_A	MENQNESLIKQYVKRRAKRRLFLWLFGTSAGLITILITVFVTLFLILAAGSIDNSDSDSSSGGEAFTGEYSEGLPIYKEIKGRGPFSDEIAQYAVGAAVKYKLLPSVILSQYGYESAFGTSASARNDLNYFGITWFDGCLFPKGTARGIGGIEGGWYMKFPNSKATFSYYGFMVATQSNFNACVGNKSPGASLLILGRGGYAAAGITEDSPYYTGCMSIITSNKLTEYDEFAIKHWGEGGNNNGTITGEWTNPFPGSSLDKSSFSGGQLFGTNPGGEFRPNGFHDGLDFGSVDHQGSEIHAVHGGKVVYVGNPGISGLGACVIVINYDGLNMVYQEFANSTGNSRVKVGDQVKVGQVIGIRDTAHLHLGFTRMDWRQAQGHAFTGDGTWIDPLPFLNSS…	ATGGAAAACCAAAATGAAAGTTTAATCAAGCAGTATGTTAAGCGTCGTGCAAAGCGACGCTTATTTTTGTGGTTGTTTGGTACTTCTGCAGGTTTGATTACTATTTTGATTACTGTGTTCGTGACCCTTTTTCTAATACTTGCGGCGGGTTCGATTGATAATTCTGATTCAGATTCAAGTAGTGGTGGCGAAGCTTTTACAGGAGAATATTCGGAAGGATTACCCATTTATAAAGAAATCAAAGGAAGAGGCCCTTTTTCTGATGAGATTGCGCAATATGCCGTAGGTGCAGCAGTGAAGTATAAATTATTACCAAGTGTGATCCTTTCGCAATACGGGTATGAATCAGCGTTTGGTACGTCGGCGTCTGCAAGAAATGATCTCAATTATTTTGGGATT…
GCF_027684345.1	NZ_JAQCWI0100000441.7759.AOI_01	91.2;Enterocin_P	MRKKLFSLALIGIFGLVVTNFGTKVDAATRSYGNGVYCNNSKCWVNWGEAKENIAGIVISGWASGLAGMGH	ATGAGAAAAAAATTATTTAGTTTAGCTCTTATTGGAATATTTGGGTTAGTTGTGACAAATTTTGGTACAAAAGTTGATGCAGCTACGCGTTCATATGGTAATGGTGTTTATTGTAATAATAGTAAATGCTGGGTTAACTGGGGAGAAGCTAAAGAGAATATTGCAGGAATCGTTATTAGTGGCTGGGCTTCTGGTTTGGCAGGTATGGGACAT
GCF_027660865.1	NZ_JAQDMQ0100000091.5670.AOI_01	81.2;Enterocin_A	MKHLKILSIKETQLIYGGTTHSGKYYGNGVYCTKNKCTVDWAKATTCIAGMSIGGFLGGAIPGKC	ATGAAACATTTAAAAATTTTGTCTATTAAAGAGACACAACTTATCTATGGGGGTACCACTCATAGTGGAAAATATTATGGAAATGGAGTGTATTGCACTAAAAATAAATGTACGGTCGATTGGGCCAAGGCAACTACTTGTATTGCAGGAATGTCTATAGGTGGTTTTTTAGGTGGAGCAATTCCAGGGAAGTGC
GCF_027660865.1	NZ_JAQDMQ0100000151.5663.AOI_01	91.2;Enterocin_P	MKRKLFSLALIGMFGLVVTGFGTKVDAATRSYGNGVYCNDDKCWVNWNEANQQIAGIVISGWASGLAGA	ATGAAAAGAAAATTATTTAGTTTAGCTCTTATCGGAATGTTTGGGTTAGTAGTGACAGGTTTTGGTACAAAAGTTGATGCAGCTACACGTTCATATGGTAATGGTGTTTATTGTAATGATGATAAATGCTGGGTGAACTGGAATGAAGCAAATCAACAAATCGCTGGAATTGTGATTAGTGGTTGGGCTTCTGGTTTGGCAGGTGCA
GCF_027660865.1	NZ_JAQDMQ0100000201.5668.AOI_01	63.3;Enterolysin_A	MENQNESLIKQYVKRRAKRRLFLWLFGTSAGLMTILITVFVTLFLILAAGSIDNSDSDSSSGGEAFTGEYSEGLPIYKEIKGRGPFSDEIAQYAVGAAVKYKLLPSVILSQYGYESAFGTSASARNDLNYFGITWFDGCLFPKGTARGIGGIEGSWYMKFPNSKAAFSYYGFMVATQSNFNACVGNKSPGASLLILGRGGYAAAGITEDSPYYTGCMSIITSNKLTEYDEFAIKHWGEGNNNNGTITGEWTNPFPGSSLDKSSFSGGQLFGTNPWGEFRPNGFHDGLDFGSVDHPGSEIHAVHGGKVVYVGNPGISGLGACVIVINYDDLNMVYQEFANSTGNSRVKVGDQVKVGQVIGIRDTAHLHLGFTRMDWRQAQGHAFTDDGTWIDPLPFLNSS…	ATGGAAAACCAAAATGAAAGTTTAATCAAGCAGTATGTTAAGCGTCGTGCAAAGCGGCGCTTATTTTTGTGGTTGTTTGGTACTTCTGCAGGTTTGATGACTATTTTGATCACTGTGTTTGTGACCCTATTTCTAATACTTGCCGCGGGATCGATTGATAATTCGGATTCAGATTCAAGCAGTGGTGGCGAAGCTTTTACAGGAGAATATTCGGAAGGATTACCCATTTATAAAGAAATCAAAGGAAGAGGCCCTTTTTCTGATGAAATTGCGCAATATGCTGTAGGTGCAGCAGTGAAATATAAATTATTACCAAGTGTGATTCTTTCGCAATACGGTTATGAATCAGCGTTTGGTACGTCGGCGTCCGCAAGAAATGATCTCAACTATTTTGGGATT…
GCF_027723505.1	NZ_JAQDSF0100000211.8704.AOI_01	63.3;Enterolysin_A	MENQDESLIKQYVKRRAKRRLFLWLFGTSAGLITILITVFVTLFLILAAGSIDNSDSDSSSGGETFTGEYSEGLPIYKEIKGRGPFSDEIAQYAVGAAVKYKLLPSVILSQYGYESAFGTSASARNDLNYFGITWFDGCLFPKGTARGIGGIEGGWYMKFPNSKAAFSYYGFMVATQSNFNACVGNKSPGASLLILGRGGYAAAGITEDSPYYTGCMSIITSNKLTEYDEFAMKHWGEGGNDNGTITGEWTNPFPGSSLDKSSFSGGQLFGTNPGGEFRPNGFHDGLDFGSVDHPGSEIHAVHGGKVVYVGNPGISGLGACVIVINYDGLNMVYQEFANSTGNSRVKVGDQVKVGQVIGIRDTAHLHLGFTRMDWRQAQGHAFTDDGTWIDPLPFLNSS…	ATGGAAAATCAAGATGAAAGTTTAATCAAGCAGTATGTTAAGCGTCGCGCAAAGCGGCGCTTATTTTTGTGGTTGTTTGGTACTTCTGCAGGTTTGATTACCATTTTGATCACTGTATTCGTGACCCTATTTTTAATACTTGCGGCTGGTTCGATTGATAATTCTGATTCAGATTCAAGCAGTGGTGGCGAAACTTTTACAGGAGAGTATTCGGAAGGATTGCCCATTTATAAAGAAATTAAAGGAAGAGGCCCTTTTTCTGATGAGATTGCGCAATATGCCGTAGGTGCAGCAGTGAAATATAAATTATTACCAAGTGTAATCCTTTCTCAATACGGTTACGAATCAGCGTTTGGTACGTCGGCGTCCGCAAGAAATGATCTCAACTATTTTGGGATT…
GCF_027723505.1	NZ_JAQDSF0100000261.8761.AOI_01	63.3;Enterolysin_A	MSFLLFFLGMDDSDTSGSTAGGTEFNGVYTEDLPSYPEIKGVGNVPDEIAQLAVGSAVKYHLLPSVIISQWAYESEWGHSASAKNDNNFFGITWFEGCPFPKGTARGVGGSEGGNYMKFPNKKSAFSYYGYMVASQTNFNACVGNKSPEQCLLTLGRGGYAAAGITMNSPYFTGCMSIIKSNNLTQYDDFTIKNWKDFGGNTGCSVGGGWGWPFPDAGQGSFAGGQLFGKNPGGEFRENGFHDGLDFGSVDHPGNEIHAIHGGTVTYVGNPGISGLGACVIVINDSGLNMVYQEFATSTSNAKVKVGDKVKLGDVIGIRDTEHLHLGITKKDWLQAESSAFTDDGTWLDPLKIITTGKY	ATGTCGTTTCTGTTGTTTTTCTTAGGTATGGATGATTCTGATACAAGTGGATCAACTGCTGGTGGAACAGAATTTAATGGTGTATATACGGAAGATTTACCTTCTTATCCTGAAATCAAAGGAGTTGGGAATGTACCTGATGAAATCGCCCAATTAGCGGTAGGATCGGCTGTAAAGTATCACTTATTGCCGAGTGTCATAATTAGTCAATGGGCTTATGAAAGTGAATGGGGGCATTCTGCGTCTGCTAAAAACGACAATAATTTTTTCGGAATCACTTGGTTTGAAGGGTGTCCTTTTCCGAAAGGGACAGCTCGTGGTGTCGGCGGTTCAGAAGGTGGAAATTATATGAAATTTCCGAATAAAAAATCAGCCTTTAGTTATTATGGCTACATGGTC…
GCF_027723505.1	NZ_JAQDSF0100000351.8721.AOI_01	95.2;Enterocin_SE-K4	LILGIVLLSVSTLGITVDAATYYGNGVYCNTQKCWVDWSRARSEIVDRGVKAYVNGFTKVLGGVGGR	TTGATTTTAGGAATTGTTTTATTGAGTGTATCTACTTTAGGAATTACAGTAGATGCTGCAACTTATTATGGAAATGGTGTTTATTGTAATACTCAAAAATGTTGGGTAGATTGGAGTAGAGCTCGCTCTGAGATTGTTGATAGAGGAGTAAAAGCTTACGTTAATGGTTTTACGAAAGTGCTAGGTGGAGTCGGTGGAAGA
GCF_027723505.1	NZ_JAQDSF0100000371.8718.AOI_01	76.2;EJ97enterocin	VISMKFNPTGTIVKKLTQYEIAWFKNKHGYYPWEIPRCx	GTGATTTCCATGAAATTTAATCCAACAGGAACCATCGTAAAAAAATTAACTCAATATGAAATAGCATGGTTCAAAAATAAACATGGATACTATCCATGGGAAATTCCTAGATGCTAA
GCF_027723505.1	NZ_JAQDSF0100000421.8709.AOI_01	14.2;Bac32	LKKTKLLVASLCLFSSLLAFTPSVSFSQNGGVVEAAAQRGYIYKKYPKGAKVPNKVKMLVNIRGKQTMRTCYLMSWTASSRTAKYYYYI	TTGAAAAAAACAAAATTATTGGTAGCTAGTTTGTGTTTGTTTAGCAGTTTATTAGCTTTCACCCCTTCTGTTTCATTTTCTCAAAATGGTGGAGTGGTTGAAGCTGCTGCTCAAAGAGGATATATCTACAAAAAATATCCAAAAGGTGCTAAAGTGCCAAATAAAGTTAAAATGTTAGTAAATATTAGAGGTAAACAAACTATGCGTACTTGTTACCTTATGAGTTGGACTGCTAGTAGTAGAACAGCCAAATATTATTACTACATT
GCF_027673865.1	NZ_JAQDWR0100000151.6138.AOI_01	63.3;Enterolysin_A	MENQNESLIKQYVKRHAKRRLFLWLFGTSAGLITILITVFVTLFLILAAGSIDNSDSDSSSGGEAFTGEYSEGLPIYKEIKGRGPFSDEIAQYAVGAAVKYKLLPSVILSQYGYESAFGTSASARNDLNYFGITWFDGCLFPKGTARGIGGIEGGWYMKFPNSKAAFSYYGFMVATQSNFNACVGNKSPGASLLILGRGGYAAAGITEDSPYYTGCMSIITSNKLTEYDEFAMKHWGEGGNDNGTITGEWTNPFPGSSLDKSSFSGGQLFGTNPGGEFRPNGFHDGLDFGSVDHPGSEIHAVHGGKVVYVGNPGISGLGACVIVINYDGLNMVYQEFANSTGNSRVKVGDQVKVGQVIGIRDTAHLHLGFARTDWRQAQGHAFTDDGTWIDPLPFLNSS…	ATGGAAAACCAAAATGAAAGTTTAATCAAGCAGTATGTTAAGCGTCATGCAAAGCGACGCTTATTTTTGTGGTTGTTTGGTACTTCTGCAGGTTTGATTACTATTTTGATTACTGTGTTCGTGACCCTTTTTCTAATACTTGCGGCGGGTTCGATTGATAATTCTGATTCAGATTCAAGTAGTGGTGGCGAAGCTTTTACAGGAGAATATTCGGAAGGATTACCCATTTATAAAGAAATCAAAGGAAGAGGCCCTTTTTCTGATGAGATTGCGCAATATGCTGTAGGTGCAGCAGTGAAATATAAATTATTACCAAGTGTGATTCTTTCGCAATACGGTTATGAATCAGCGTTTGGTACGTCGGCGTCCGCAAGAAATGATCTCAACTATTTTGGGATT…
GCF_027672745.1	NZ_JAQDXU0100000381.6099.AOI_01	91.2;Enterocin_P	MRKKLFSLTLIGKFGLVVTNFGTKVDAATRSYGNGVYCNNSKCWVNWGEAKENIAGIVISGWASGLAGMGH	ATGAGAAAAAAATTATTTAGTTTAACTCTTATTGGAAAGTTTGGATTAGTTGTGACGAATTTTGGTACAAAAGTTGATGCAGCTACGCGTTCATATGGTAATGGTGTTTATTGTAATAATAGTAAGTGCTGGGTTAACTGGGGAGAAGCTAAAGAAAATATTGCAGGAATTGTTATTAGTGGCTGGGCTTCTGGCTTGGCAGGTATGGGACAT
GCF_027672545.1	NZ_JAQDYI0100000241.5985.AOI_01	95.2;Enterocin_SE-K4	LILGIVLLSVSTLGITVDAATYYGNGVYCNTQKCWVDWSRARSEIVDRGVKAYVNGFTKVLGGVGGR	TTGATTTTAGGAATTGTTTTATTGAGTGTATCTACTTTAGGAATTACAGTAGATGCTGCAACTTATTATGGAAATGGTGTTTATTGTAATACTCAAAAATGTTGGGTAGATTGGAGTAGAGCTCGCTCTGAGATTGTTGATAGAGGAGTAAAAGCTTACGTTAATGGTTTTACGAAAGTGCTAGGTGGAGTCGGTGGAAGA
GCF_027672545.1	NZ_JAQDYI0100000241.5985.AOI_02	63.3;Enterolysin_A	MENQNESLIKQYVKRRAKRRLFLWLFGTSAGLITILITVFVTLFLILAAGSIDNSDSDSSSGGETFTGEYSEGLPIYKEIKGRGPFSDEIAQYAVGAAVKYKLLPSVILSQYGYESAFGTSASARNDLNYFGITWFDGCLFPKGTARGIGGIEGGWYMKFPNSKAAFSYYGFMVATQSNFNACVGNKSPGASLLILGRGGYAAAGITEDSPYYTGCMSIITSNKLTEYDEFAIKHWGEGGNNNGTITGEWTNPFPGSSLDKSSFSGGQLFGTNPGGEFRPNGFHDGLDFGSVDHQGSEIHAVHGGKVVYVGNPGISGLGACVIVINYDGLNMVYQEFANSTGNSRVKVGDQVKVGQVIGIRDTAHLHLGFTRMDWRQAQGHAFTGDGTWIDPLPFLNSS…	ATGGAAAACCAAAATGAAAGTTTAATCAAGCAGTATGTTAAGCGTCGTGCAAAGCGACGCTTATTTTTGTGGTTGTTTGGTACTTCTGCAGGTTTGATTACCATTTTGATCACTGTATTCGTGACCCTATTTTTAATACTTGCGGCTGGTTCGATTGATAATTCTGATTCAGATTCAAGCAGTGGTGGCGAAACTTTTACAGGAGAGTATTCGGAAGGATTGCCCATTTATAAAGAAATCAAAGGAAGAGGCCCTTTTTCTGATGAGATTGCGCAATATGCCGTAGGTGCAGCAGTGAAGTATAAATTATTACCAAGTGTGATCCTTTCGCAATACGGGTATGAATCAGCGTTTGGTACGTCGGCGTCTGCAAGAAATGATCTCAATTATTTTGGGATT…
GCF_027670925.1	NZ_JAQEBH0100000251.5924.AOI_01	63.3;Enterolysin_A	MENQNESLIKQYVKRRAKRRLFLWLFGTSAGLITILITVFVTLFLILAAGSIDNSDSDSSSGGEAFTGEYSEGLPIYKEIKGRGPFSDEIAQYAVGAAVKYKLLPSVILSQYGYESAFGTSASARNDLNYFGITWFDGCLFPKGTARGIGGIEGGWYMKFPNSKATFSYYGFMVATQSNFNACVGNKSPGASLLILGRGGYAAAGITEDSPYYTGCMSIITSNKLTEYDEFAIKHWGEGGNNNGTITGEWTNPFPGSSLDKSSFSGGQLFGTNPGGEFRPNGFHDGLDFGSVDHQGSEIHAVHGGKVVYVGNPGISGLGACVIVINYDGLNMVYQEFANSTGNSRVKVGDQVKVGQVIGIRDTAHLHLGFTRMDWRQAQGHAFTGDGTWIDPLPFLNSS…	ATGGAAAACCAAAATGAAAGTTTAATCAAGCAGTATGTTAAGCGTCGTGCAAAGCGACGCTTATTTTTGTGGTTGTTTGGTACTTCTGCAGGTTTGATTACTATTTTGATTACTGTGTTCGTGACCCTTTTTCTAATACTTGCGGCGGGTTCGATTGATAATTCTGATTCAGATTCAAGTAGTGGTGGCGAAGCTTTTACAGGAGAATATTCGGAAGGATTACCCATTTATAAAGAAATCAAAGGAAGAGGCCCTTTTTCTGATGAGATTGCGCAATATGCCGTAGGTGCAGCAGTGAAGTATAAATTATTACCAAGTGTGATCCTTTCGCAATACGGGTATGAATCAGCGTTTGGTACGTCGGCGTCTGCAAGAAATGATCTCAATTATTTTGGGATT…
GCF_027670925.1	NZ_JAQEBH0100000511.5954.AOI_01	91.2;Enterocin_P	MRKKLFSLALIGIFGLVVTNFGTKVDAATRSYGNGVYCNNSKCWVNWGEAKENIAGIVISGWASGLAGMGH	ATGAGAAAAAAATTATTTAGTTTAGCTCTTATTGGAATATTTGGGTTAGTTGTGACAAATTTTGGTACAAAAGTTGATGCAGCTACGCGTTCATATGGTAATGGTGTTTATTGTAATAATAGTAAATGCTGGGTTAACTGGGGAGAAGCTAAAGAGAATATTGCAGGAATCGTTATTAGTGGCTGGGCTTCTGGTTTGGCAGGTATGGGACAT
GCF_027670765.1	NZ_JAQEBL0100000211.5892.AOI_01	63.3;Enterolysin_A	MENQNESLIKQYVKRRAKRRLFLWLFGTSAGLITILITVFVTLFLILAAGSIDNSDSDSSSGGEAFTGEYSEGLPIYKEIKGRGPFSDEIAQYAVGAAVKYKLLPSVILSQYGYESAFGTSASARNDLNYFGITWFDGCLFPKGTARGIGGIEGGWYMKFPNSKATFSYYGFMVATQSNFNACVGNKSPGASLLILGRGGYAAAGITEDSPYYTGCMSIITSNKLTEYDEFAIKHWGEGGNNNGTITGEWTNPFPGSSLDKSSFSGGQLFGTNPGGEFRPNGFHDGLDFGSVDHQGSEIHAVHGGKVVYVGNPGISGLGACVIVINYDGLNMVYQEFANSTGNSRVKVGDQVKVGQVIGIRDTAHLHLGFTRMDWRQAQGHAFTGDGTWIDPLPFLNSS…	ATGGAAAACCAAAATGAAAGTTTAATCAAGCAGTATGTTAAGCGTCGTGCAAAGCGACGCTTATTTTTGTGGTTGTTTGGTACTTCTGCAGGTTTGATTACTATTTTGATTACTGTGTTCGTGACCCTTTTTCTAATACTTGCGGCGGGTTCGATTGATAATTCTGATTCAGATTCAAGTAGTGGTGGCGAAGCTTTTACAGGAGAATATTCGGAAGGATTACCCATTTATAAAGAAATCAAAGGAAGAGGCCCTTTTTCTGATGAGATTGCGCAATATGCCGTAGGTGCAGCAGTGAAGTATAAATTATTACCAAGTGTGATCCTTTCGCAATACGGGTATGAATCAGCGTTTGGTACGTCGGCGTCTGCAAGAAATGATCTCAATTATTTTGGGATT…
GCF_027670765.1	NZ_JAQEBL0100000461.5876.AOI_01	91.2;Enterocin_P	MRKKLFSLALIGIFGLVVTNFGTKVDAATRSYGNGVYCNNSKCWVNWGEAKENIAGIVISGWASGLAGMGH	ATGAGAAAAAAATTATTTAGTTTAGCTCTTATTGGAATATTTGGGTTAGTTGTGACAAATTTTGGTACAAAAGTTGATGCAGCTACGCGTTCATATGGTAATGGTGTTTATTGTAATAATAGTAAATGCTGGGTTAACTGGGGAGAAGCTAAAGAGAATATTGCAGGAATCGTTATTAGTGGCTGGGCTTCTGGTTTGGCAGGTATGGGACAT
GCF_027668185.1	NZ_JAQEFE0100000221.5864.AOI_01	63.3;Enterolysin_A	MENQNESLIKQYVKRRAKRRLFLWLFGTSAGLITILITVFVTLFLILAAGSIDNSDSDSSSGGEAFTGEYSEGLPIYKEIKGRGPFSDEIAQYAVGAAVKYKLLPSVILSQYGYESAFGTSASARNDLNYFGITWFDGCLFPKGTARGIGGIEGGWYMKFPNSKATFSYYGFMVATQSNFNACVGNKSPGASLLILGRGGYAAAGITEDSPYYTGCMSIITSNKLTEYDEFAIKHWGEGGNNNGTITGEWTNPFPGSSLDKSSFSGGQLFGTNPGGEFRPNGFHDGLDFGSVDHQGSEIHAVHGGKVVYVGNPGISGLGACVIVINYDGLNMVYQEFANSTGNSRVKVGDQVKVGQVIGIRDTAHLHLGFTRMDWRQAQGHAFTGDGTWIDPLPFLNSS…	ATGGAAAACCAAAATGAAAGTTTAATCAAGCAGTATGTTAAGCGTCGTGCAAAGCGACGCTTATTTTTGTGGTTGTTTGGTACTTCTGCAGGTTTGATTACTATTTTGATTACTGTGTTCGTGACCCTTTTTCTAATACTTGCGGCGGGTTCGATTGATAATTCTGATTCAGATTCAAGTAGTGGTGGCGAAGCTTTTACAGGAGAATATTCGGAAGGATTACCCATTTATAAAGAAATCAAAGGAAGAGGCCCTTTTTCTGATGAGATTGCGCAATATGCCGTAGGTGCAGCAGTGAAGTATAAATTATTACCAAGTGTGATCCTTTCGCAATACGGGTATGAATCAGCGTTTGGTACGTCGGCGTCTGCAAGAAATGATCTCAATTATTTTGGGATT…
GCF_027668185.1	NZ_JAQEFE0100000381.5835.AOI_01	91.2;Enterocin_P	MRKKLFSLALIGIFGLVVTNFGTKVDAATRSYGNGVYCNNSKCWVNWGEAKENIAGIVISGWASGLAGMGH	ATGAGAAAAAAATTATTTAGTTTAGCTCTTATTGGAATATTTGGGTTAGTTGTGACAAATTTTGGTACAAAAGTTGATGCAGCTACGCGTTCATATGGTAATGGTGTTTATTGTAATAATAGTAAATGCTGGGTTAACTGGGGAGAAGCTAAAGAGAATATTGCAGGAATCGTTATTAGTGGCTGGGCTTCTGGTTTGGCAGGTATGGGACAT
GCF_027667845.1	NZ_JAQEFO0100000181.5792.AOI_01	63.3;Enterolysin_A	MENQDESLIKQYVKRRAKRRLFLWLFGTSAGLITILITVFVTLFLILAAGSIDNSDSDSSSGGETFTGEYSEGLPIYKEIKGRGPFSDEIAQYAVGAAVKYKLLPSVILSQYGYESAFGTSASARNDLNYFGITWFDGCLFPKGTARGIGGIEGGWYMKFPNSKAAFSYYGFMVATQSNFNACVGNKSPGASLLILGRGGYAAAGITEDSPYYTGCMSIITSNKLTEYDEFAIKHWGEGGNNNGTITGEWTNPFPGSSLDKSSFSGGQLFGTNPGGEFRPNGFHDGLDFGSVDHPGSEIHAVHVGKVVYVGNPGISGLGACVIVINYDGLNMVYQEFANSTGNSCVKVGDQVKVGQVIGIRDTAHLHLGFTRMDWRQAQGHAFTGDGTWIDPLPFLNSS…	ATGGAAAATCAAGATGAAAGTTTAATCAAGCAGTATGTTAAGCGTCGCGCAAAGCGGCGCTTATTTTTGTGGTTGTTTGGTACTTCTGCAGGTTTGATTACCATTTTGATCACTGTATTCGTGACCCTATTTTTAATACTTGCGGCTGGTTCGATTGATAATTCGGATTCAGATTCAAGCAGTGGTGGCGAAACTTTTACAGGAGAGTATTCGGAAGGATTGCCCATTTATAAAGAAATCAAAGGAAGAGGCCCTTTTTCTGATGAGATTGCGCAATATGCCGTAGGTGCAGCAGTGAAATATAAATTATTACCAAGTGTAATCCTTTCTCAATACGGTTACGAATCAGCGTTTGGTACGTCGGCGTCCGCAAGAAATGATCTCAACTATTTTGGAATT…
GCF_027667845.1	NZ_JAQEFO0100000411.5809.AOI_01	91.2;Enterocin_P	MRKKLFSLALIGIFGLVVTNFGTKVDAATRSYGNGVYCNNSKCWVNWGEAKENIAGIVISGWASGLAGMGH	ATGAGAAAAAAATTATTTAGTTTAGCTCTTATTGGAATATTTGGGTTAGTTGTGACAAATTTTGGTACAAAAGTTGATGCAGCTACGCGTTCATATGGTAATGGTGTTTATTGTAATAATAGTAAATGCTGGGTTAACTGGGGAGAAGCTAAAGAGAATATTGCAGGAATCGTTATTAGTGGCTGGGCTTCTGGTTTGGCAGGTATGGGACAT
GCF_027667605.1	NZ_JAQEFU0100000221.5756.AOI_01	63.3;Enterolysin_A	MENQNESLIKQYVKRRAKRRLFLWLFGTSAGLITILITVFVTLFLILAAGSIDNSDSDSSSGGEAFTGEYSEGLPIYKEIKGRGPFSDEIAQYAVGAAVKYKLLPSVILSQYGYESAFGTSASARNDLNYFGITWFDGCLFPKGTARGIGGIEGGWYMKFPNSKATFSYYGFMVATQSNFNACVGNKSPGASLLILGRGGYAAAGITEDSPYYTGCMSIITSNKLTEYDEFAIKHWGEGGNNNGTITGEWTNPFPGSSLDKSSFSGGQLFGTNPGGEFRPNGFHDGLDFGSVDHQGSEIHAVHGGKVVYVGNPGISGLGACVIVINYDGLNMVYQEFANSTGNSRVKVGDQVKVGQVIGIRDTAHLHLGFTRMDWRQAQGHAFTGDGTWIDPLPFLNSS…	ATGGAAAACCAAAATGAAAGTTTAATCAAGCAGTATGTTAAGCGTCGTGCAAAGCGACGCTTATTTTTGTGGTTGTTTGGTACTTCTGCAGGTTTGATTACTATTTTGATTACTGTGTTCGTGACCCTTTTTCTAATACTTGCGGCGGGTTCGATTGATAATTCTGATTCAGATTCAAGTAGTGGTGGCGAAGCTTTTACAGGAGAATATTCGGAAGGATTACCCATTTATAAAGAAATCAAAGGAAGAGGCCCTTTTTCTGATGAGATTGCGCAATATGCCGTAGGTGCAGCAGTGAAGTATAAATTATTACCAAGTGTGATCCTTTCGCAATACGGGTATGAATCAGCGTTTGGTACGTCGGCGTCTGCAAGAAATGATCTCAATTATTTTGGGATT…
GCF_027667605.1	NZ_JAQEFU0100000391.5764.AOI_01	91.2;Enterocin_P	MRKKLFSLALIGIFGLVVTNFGTKVDAATRSYGNGVYCNNSKCWVNWGEAKENIAGIVISGWASGLAGMGH	ATGAGAAAAAAATTATTTAGTTTAGCTCTTATTGGAATATTTGGGTTAGTTGTGACAAATTTTGGTACAAAAGTTGATGCAGCTACGCGTTCATATGGTAATGGTGTTTATTGTAATAATAGTAAATGCTGGGTTAACTGGGGAGAAGCTAAAGAGAATATTGCAGGAATCGTTATTAGTGGCTGGGCTTCTGGTTTGGCAGGTATGGGACAT
GCF_027667265.1	NZ_JAQEGE0100000181.5694.AOI_01	63.3;Enterolysin_A	MENQNESLIKQYVKRRAKRRLFLWLFGTSAGLITILITVFVTLFLILAAGSIDNSDSDSSSGGEDFTGEYSEGLPIYKEIKGRGPFSDEIAQYAVGAAVKYKLLPSVILSQYGYESAFGTSASARNDLNYFGITWFDGCLFPKGTARGIGGIEGGWYMKFPNSKAAFSYYGFMVATQSNFNACVGNKSPGASLLILGRGGYAAAGITEDSPYYTGCMSIITSNKLTEYDEFAMKHWGEGGNDNGTITGEWTNPFPGSSLDKSSFSGGQLFGTNPGGEFRPNGFHDGLDFGSVDHPGSEIHAVHGGKVVYVGNPGISGLGACVIVINYDGLNMVYQEFANSTGNSRVKVGDQVKVGQVIGIRDTAHLHLGFTRMDWRQAQGHAFTDDGTWIDPLPFLNSS…	ATGGAAAACCAAAATGAAAGTTTAATCAAGCAGTATGTTAAGCGTCGTGCAAAGCGACGCTTATTTTTGTGGTTGTTTGGGACTTCTGCAGGTTTGATTACTATTTTGATTACTGTGTTCGTGACCCTTTTTCTAATACTTGCGGCGGGTTCGATTGATAATTCTGATTCAGATTCAAGTAGTGGTGGCGAAGATTTTACAGGAGAATATTCGGAAGGATTACCCATTTATAAAGAAATCAAAGGAAGAGGCCCTTTTTCTGATGAGATTGCGCAATATGCTGTAGGTGCAGCAGTGAAATATAAATTATTACCAAGTGTGATTCTTTCGCAATACGGTTATGAATCAGCGTTTGGTACGTCGGCGTCCGCAAGAAATGATCTCAACTATTTTGGGATT…
GCF_027667265.1	NZ_JAQEGE0100000471.5683.AOI_01	91.2;Enterocin_P	MRKKLFSLTLIGKFGLVVTNFGTKVDAATRSYGNGVYCSNSKCWVNWGEAKENIAGIVISGWASGLAGMGH	ATGAGAAAAAAATTATTTAGTTTAACTCTTATTGGAAAGTTTGGATTAGTTGTGACGAATTTTGGTACAAAAGTTGATGCAGCTACGCGTTCATATGGTAATGGTGTTTATTGTAGTAATAGTAAGTGCTGGGTTAACTGGGGAGAAGCTAAAGAAAATATTGCAGGAATTGTTATTAGTGGCTGGGCTTCTGGCTTGGCAGGTATGGGACAT
GCF_027679825.1	NZ_JAQEJJ0100000211.7687.AOI_01	63.3;Enterolysin_A	MENQNESLIKQYVKRRAKRRLFLWLFGTSAGLMTILITVFVTLFLILAAGSIDNSDSDSSSGGETFTGEYSEGLPIYKEIKGRGPFSDEIAQYAVGAAVKYKLLPSVILSQYGYESAFGTSASARNDLNYFGITWFDGCLFPKGTARGIGGIEGGWYMKFPNSKAAFSYYGFMVATQSNFNACVGNKSPGASLLILGRGGYAAAGITEDSPYYTGCMSIITSNKLTEYDEFAIKHWGEGGNNNGTITGEWTNPFPGSSLDKSSFSGGQLFGTNPGGEFRPNGFHDGLDFGSVDHPGSEIHAVHGGKVVYVGNPGISGLGACVIVINYDGLNMVYQEFANSTGNSRVKVGDQVKVGQVIGIRDTAHLHLGFTRMDWRQAQGHAFTDDGTWIDPLPFLNSS…	ATGGAAAACCAAAATGAAAGTTTAATCAAGCAGTATGTTAAGCGTCGTGCAAAGCGACGCTTATTTTTGTGGTTGTTTGGTACTTCTGCAGGTTTGATGACTATTTTGATCACTGTGTTCGTGACCCTATTTCTAATACTTGCGGCTGGTTCGATTGATAATTCTGATTCAGATTCAAGCAGTGGTGGCGAAACTTTTACAGGAGAGTATTCGGAAGGATTGCCCATTTATAAAGAAATCAAAGGAAGAGGCCCTTTTTCTGATGAGATTGCGCAATATGCCGTAGGTGCAGCAGTGAAGTATAAATTATTACCAAGTGTGATCCTTTCGCAATACGGGTATGAATCAGCGTTTGGTACGTCAGCGTCTGCAAGAAATGATCTCAATTATTTTGGGATT…
GCF_027679445.1	NZ_JAQEKD0100000201.7622.AOI_01	63.3;Enterolysin_A	MENQNESLIKQYVKRRAKRRLFLWLFGTSAGLITILITVFVTLFLILAAGSIDNSDSDSSSGGEDFTGEYSEGLPIYKEIKGRGPFSDEIAQYAVGAAVKYKLLPSVILSQYGYESAFGTSASARNDLNYFGITWFDGCLFPKGTARGIGGIEGGWYMKFPNSKAAFSYYGFMVATQSNFNACVGNKSPGASLLILGRGGYAAAGITEDSPYYTGCMSIITSNKLTEYDEFAMKHWGEGGNDNGTITGEWTNPFPGSSLDKSSFSGGQLFGTNPGGEFRPNGFHDGLDFGSVDHPGSEIHAVHGGKVVYVGNPGISGLGACVIVINYDGLNMVYQEFANSTGNSRVKVGDQVKVGQVIGIRDTAHLHLGFTRMDWRQAQGHAFTDDGTWIDPLPFLNSS…	ATGGAAAACCAAAATGAAAGTTTAATCAAGCAGTATGTTAAGCGTCGTGCAAAGCGACGCTTATTTTTGTGGTTGTTTGGGACTTCTGCAGGTTTGATTACTATTTTGATTACTGTGTTCGTGACCCTTTTTCTAATACTTGCGGCGGGTTCGATTGATAATTCTGATTCAGATTCAAGTAGTGGTGGCGAAGATTTTACAGGAGAATATTCGGAAGGATTACCCATTTATAAAGAAATCAAAGGAAGAGGCCCTTTTTCTGATGAGATTGCGCAATATGCTGTAGGTGCAGCAGTGAAATATAAATTATTACCAAGTGTGATTCTTTCGCAATACGGTTATGAATCAGCGTTTGGTACGTCGGCGTCCGCAAGAAATGATCTCAACTATTTTGGGATT…
GCF_027678895.1	NZ_JAQELE0100000221.7584.AOI_01	63.3;Enterolysin_A	MENQNESLIKQYVKRRAKRRLFLWLFGTSAGLMTILITVFVTLFLILAAGSIDNSDSDSSSGGETFTGEYSEGLPIYKEIKGRGPFSDEIAQYAVGAAVKYKLLPSVILSQYGYESAFGTSASARNDLNYFGITWFDGCLFPKGTARGIGGIEGGWYMKFPNSKAAFSYYGFMVATQSNFNACVGNKSPGASLLILGRGGYAAAGITEDSPYYTGCMSIITSNKLTEYDEFAIKHWGEGGNNNGTITGEWTNPFPGSSLDKSSFSGGQLFGTNPGGEFRPNGFHDGLDFGSVDHPGSEIHAVHGGKVVYVGNPGISGLGACVIVINYDGLNMVYQEFANSTGNSRVKVGDQVKVGQVIGIRDTAHLHLGFTRMDWRQAQGHAFTDDGTWIDPLPFLNSS…	ATGGAAAACCAAAATGAAAGTTTAATCAAGCAGTATGTTAAGCGTCGTGCAAAGCGACGCTTATTTTTGTGGTTGTTTGGTACTTCTGCAGGTTTGATGACTATTTTGATCACTGTGTTCGTGACCCTATTTCTAATACTTGCGGCTGGTTCGATTGATAATTCTGATTCAGATTCAAGCAGTGGTGGCGAAACTTTTACAGGAGAGTATTCGGAAGGATTGCCCATTTATAAAGAAATCAAAGGAAGAGGCCCTTTTTCTGATGAGATTGCGCAATATGCCGTAGGTGCAGCAGTGAAGTATAAATTATTACCAAGTGTGATCCTTTCGCAATACGGGTATGAATCAGCGTTTGGTACGTCAGCGTCTGCAAGAAATGATCTCAATTATTTTGGGATT…
GCF_027676765.1	NZ_JAQENY0100000441.7431.AOI_01	63.3;Enterolysin_A	MENQNESLIKQYVKRRAKRRLFLWLFGTSAGLITILITVFVTLFLILAAGSIDNSDSSSGGEAFTGEYSEGLPIYKEIKGRGPFSDEITQYAVGAAVKYKLLPSVILSQYGYESAFGTSASARNDLNYFGITWFDGCLFPKGTARGIGGIEGGWYMKFPNSKAAFSYYGFMVATQSNFNACVGNKSPGASLLILGRGGYAAAGITEDSPYYTGCMSIITSNKLTEYDEFAIKHWGEGGNNNGTITGEWTNPFPGSSLDKSSFSGGQLFGTNPGGEFRPNGFHDGLDFGSVDHPGSEIHAVHGGKVVYVGNPGISGLGACVIVINYDGLNMVYQEFANSTGNSRVKVGDQVKVGQVIGIRDTAHLHLGFTRMDWRQAQGHAFTDDGTWIDPLPFLNSSKK	ATGGAAAACCAAAATGAAAGTTTAATCAAGCAGTATGTTAAGCGTCGTGCAAAGCGACGCTTATTTTTGTGGTTGTTTGGTACTTCTGCAGGTTTGATTACTATTTTGATCACTGTGTTCGTGACCCTTTTTCTAATACTTGCGGCGGGTTCGATTGATAATTCTGATTCAAGTAGTGGTGGCGAAGCTTTTACAGGAGAATATTCGGAAGGATTACCCATTTATAAAGAAATCAAAGGAAGAGGCCCTTTTTCCGATGAGATTACGCAATATGCTGTAGGTGCAGCAGTGAAATATAAATTATTACCAAGTGTGATTCTTTCGCAATACGGTTATGAATCAGCGTTTGGTACGTCGGCGTCCGCAAGAAATGATCTCAACTATTTTGGGATTACGTGG…
GCF_027676765.1	NZ_JAQENY0100000921.7464.AOI_01	225.2;UviB	MEKLLGSLLSNPEQISFAVLFVGLFIWVMQQNNAREKRYQSTIDKLTNALGDMEAIKSTVEKIHEKLQ	ATGGAAAAATTATTAGGATCGTTACTCTCAAACCCCGAACAAATCAGCTTCGCTGTTTTGTTTGTGGGTTTATTTATTTGGGTAATGCAGCAGAACAACGCACGAGAAAAAAGATATCAAAGTACTATTGATAAATTGACAAATGCATTGGGCGATATGGAAGCAATCAAAAGCACTGTGGAGAAAATCCACGAAAAACTACAG
GCF_027676765.1	NZ_JAQENY0100001071.7461.AOI_01	91.2;Enterocin_P	MRKKLFSLALIGIFGLVVTNFGTKVDAATRSYGNGVYCNNSKCWVNWGEAKENIAGIVISGWASGLAGMGH	ATGAGAAAAAAATTATTTAGTTTAGCTCTTATTGGAATATTTGGGTTAGTTGTGACAAATTTTGGTACAAAAGTTGATGCAGCTACGCGTTCATATGGTAATGGTGTTTATTGTAATAATAGTAAATGCTGGGTTAACTGGGGAGAAGCTAAAGAGAATATTGCAGGAATCGTTATTAGTGGCTGGGCTTCTGGTTTGGCAGGTATGGGACAT
GCF_027676695.1	NZ_JAQENZ0100000411.7277.AOI_01	63.3;Enterolysin_A	MENQDESLIKQYVKRRAKRRLFLWLFGTSAGLITILITVFVTLFLILAAGSIDNSDSDSSSGGETFTGEYSEGLPIYKEIKGRGPFSDEIAQYAVGAAVKYKLLPSVILSQYGYESAFGTSASARNDLNYFGITWFDGCLFPKGTARGIGGIEGGWYMKFPNSKAAFSYYGFMVATQSNFNACVGNKSPGASLLILGRGGYAAAGITEDSPYYTGCMSIITSNKLTEYDEFAIKHWGEGGNNNGTITGEWTNPFPGSSLDKSSFSGGQLFGTNPGGEFRPNGFHDGLDFGSVDHPGSEIHAVHVGKVVYVGNPGISGLGACVIVINYDGLNMVYQEFANSTGNSCVKVGDQVKVGQVIGIRDTAHLHLGFTRMDWRQAQGHAFTGDGTWIDPLPFLNSS…	ATGGAAAATCAAGATGAAAGTTTAATCAAGCAGTATGTTAAGCGTCGCGCAAAGCGGCGCTTATTTTTGTGGTTGTTTGGTACTTCTGCAGGTTTGATTACCATTTTGATCACTGTATTCGTGACCCTATTTTTAATACTTGCGGCTGGTTCGATTGATAATTCGGATTCAGATTCAAGCAGTGGTGGCGAAACTTTTACAGGAGAGTATTCGGAAGGATTGCCCATTTATAAAGAAATCAAAGGAAGAGGCCCTTTTTCTGATGAGATTGCGCAATATGCCGTAGGTGCAGCAGTGAAATATAAATTATTACCAAGTGTGATCCTTTCTCAATACGGTTACGAATCAGCGTTTGGTACGTCGGCGTCCGCAAGAAATGATCTCAACTATTTTGGAATT…
GCF_027676695.1	NZ_JAQENZ0100001191.7208.AOI_01	225.2;UviB	MEKLLGSLLSNPEQISFAVLFVGLFIWVMQQNNAREKRYQSTIDKLTNALGDMEAIKSTVEKIHEKLQ	ATGGAAAAATTATTAGGATCGTTACTCTCAAACCCCGAACAAATCAGCTTCGCTGTTTTGTTTGTGGGTTTATTTATTTGGGTAATGCAGCAGAACAACGCACGAGAAAAAAGATATCAAAGTACTATTGATAAATTGACAAATGCATTGGGCGATATGGAAGCAATCAAAAGCACTGTGGAGAAAATCCACGAAAAACTACAG
GCF_027676705.1	NZ_JAQEOB0100000371.7357.AOI_01	63.3;Enterolysin_A	MENQNESLIKQYVKRRAKRRLFLWLFGTSAGLITILITVFVTLFLILAAGSIDNSDSDSSSGGEAFTGEYSEGLPIYKEIKGRGPFSDEIAQYAVGAAVKYKLLPSVILSQYGYESAFGTSASARNDLNYFGITWFDGCLFPKGTARGIGGIEGGWYMKFPNSKAAFSYYGFMVATQSNFNACVGNKSPGASLLILGRGGYAAAGITEDSPYYTGCMSIITSNKLTEYDEFAIKHWGEGGNNNGTITGEWTNPFPGSSLDKSSFSGGQLFGTNPGGEFRPNGFHDGLDFGSVDHQGSEIHAVHGGKVVYVGNPGISGLGACVIVINYDGLNMVYQEFANSTGNSRVKVGDQVKVGQVIGIRDTAHLHLGFTRMDWRQAQGHAFTGDGTWIDPLPFLNSS…	ATGGAAAACCAAAATGAAAGTTTAATCAAGCAGTATGTTAAGCGTCGTGCAAAGCGACGCTTATTTTTGTGGTTGTTTGGTACTTCTGCAGGTTTGATTACTATTTTGATTACTGTGTTCGTGACCCTTTTTCTAATACTTGCGGCGGGTTCGATTGATAATTCTGATTCAGATTCAAGTAGTGGTGGCGAAGCTTTTACAGGAGAATATTCGGAAGGATTACCCATTTATAAAGAAATCAAAGGAAGAGGCCCTTTTTCTGATGAGATTGCGCAATATGCCGTAGGTGCAGCAGTGAAGTATAAATTATTACCAAGTGTGATCCTTTCGCAATACGGGTATGAATCAGCGTTTGGTACGTCGGCGTCTGCAAGAAATGATCTCAATTATTTTGGGATT…
GCF_027676705.1	NZ_JAQEOB0100000891.7345.AOI_01	225.2;UviB	MEKLLGSLLSNPEQISFAVLFVGLFIWVMQQNNAREKRYQSTIDKLTNALGDMEAIKSTVEKIHEKLQ	ATGGAAAAATTATTAGGATCGTTACTCTCAAACCCCGAACAAATCAGCTTCGCTGTTTTGTTTGTGGGTTTATTTATTTGGGTAATGCAGCAGAACAACGCACGAGAAAAAAGATATCAAAGTACTATTGATAAATTGACAAATGCATTGGGCGATATGGAAGCAATCAAAAGCACTGTGGAGAAAATCCACGAAAAACTACAG
GCF_027676665.1	NZ_JAQEOC0100000451.7152.AOI_01	95.2;Enterocin_SE-K4	LILGIVLLSVSTLGITVDAATYYGNGVYCNTQKCWVDWSRARSEIVDRGVKAYVNGFTKVLGGVGGR	TTGATTTTAGGAATTGTTTTATTGAGTGTATCTACTTTAGGAATTACAGTAGATGCTGCAACTTATTATGGAAATGGTGTTTATTGTAATACTCAAAAATGTTGGGTAGATTGGAGTAGAGCTCGCTCTGAGATTGTTGATAGAGGAGTAAAAGCTTACGTTAATGGTTTTACGAAAGTGCTAGGTGGAGTCGGTGGAAGA
GCF_027676665.1	NZ_JAQEOC0100000691.7161.AOI_01	225.2;UviB	MEKLLGSLLSNPEQISFAVLFVGLFIWVMQQNNAREKRYQSTIDKLTNALGDMEAIKSTVEKIHEKLQ	ATGGAAAAATTATTAGGATCGTTACTCTCAAACCCCGAACAAATCAGCTTCGCTGTTTTGTTTGTGGGTTTATTTATTTGGGTAATGCAGCAGAACAACGCACGAGAAAAAAGATATCAAAGTACTATTGATAAATTGACAAATGCATTGGGCGATATGGAAGCAATCAAAAGCACTGTGGAGAAAATCCACGAAAAACTACAG
GCF_027676575.1	NZ_JAQEOF0100000561.7098.AOI_01	63.3;Enterolysin_A	MENQDESLIKQYVKRRAKRRLFLWLFGTSAGLITILITVFVTLFLILAAGSIDNSDSDSSSGGETFTGEYSEGLPIYKEIKGRGPFSDEIAQYAVGAAVKYKLLPSVILSQYGYESAFGTSASARNDLNYFGITWFDGCLFPKGTARGIGGIEGGWYMKFPNSKAAFSYYGFMVATQSNFNACVGNKSPGASLLILGRGGYAAAGITGDSPYYTGCMSIITSNKLTEYDEFAIKHWGEGGNNNGTITGEWTNPFPGSSLDKSSFSGGQLFGTNPGGEFRPNGFHDGLDFGSVDHPGSEIHAVHVGKVVYVGNPGISGLGACVIVINYDGLNMVYQEFANSTGNSCVKVGDQVKVGQVIGIRDTAHLHLGFTRMDWRQAQGHAFTGDGTWIDPLPFLNSS…	ATGGAAAATCAAGATGAAAGTTTAATCAAGCAGTATGTTAAGCGTCGCGCAAAGCGGCGCTTATTTTTGTGGTTGTTTGGTACTTCTGCAGGTTTGATTACCATTTTGATCACTGTATTCGTGACCCTATTTTTAATACTTGCGGCTGGTTCGATTGATAATTCGGATTCAGATTCAAGCAGTGGTGGCGAAACTTTTACAGGAGAGTATTCGGAAGGATTGCCCATTTATAAAGAAATCAAAGGAAGAGGCCCTTTTTCTGATGAGATTGCGCAATATGCCGTAGGTGCAGCAGTGAAATATAAATTATTACCAAGTGTAATCCTTTCTCAATACGGTTACGAATCAGCGTTTGGTACGTCGGCGTCCGCAAGAAATGATCTCAACTATTTTGGAATT…
GCF_027676425.1	NZ_JAQEOI0100000421.6789.AOI_01	63.3;Enterolysin_A	MENQNESLIKQYVKRRAKRRLFLWLFGTSAGLMTILITVFVTLFLILAAGSIDNPDSDSSSGGEAFTGEYSEGLPIYKEIKGRGPFSDEIAQYAVGAAVKYKLLPSVILSQYGYESAFGTSLSAKNDLNFFGITWLDGCLFPKGTARGIGGIEGGWYMKFPNSKAAFSYYGFMVATQSNFNESVGNKSPGASLLILGRGGYAAAGITEDSPYYTGCMSIITSNKLTEYDEFAIKHWGEGGNDNGTITGEWTNPFPGSSLDKSSFSGGQLFGTNPGGEFRPNGFHDGLDFGSVDHPGSEIHAVHGGKVVYVGNPGISGLGACVIVINYDGLNMVYQEFANSTGNSCVKVGDQVKVGQVIGIRDTAHLHLGFTRMDWRQAQGHAFTDDGTWIDPLPFLNSS…	ATGGAAAACCAAAATGAAAGTTTAATCAAGCAGTATGTTAAGCGTCGTGCAAAGCGACGCTTATTTTTGTGGTTGTTTGGTACTTCTGCAGGTTTGATGACTATTTTGATCACTGTGTTCGTGACCCTTTTTCTAATACTTGCGGCGGGTTCGATTGATAATCCGGATTCAGATTCAAGCAGTGGTGGCGAAGCTTTTACAGGAGAATATTCGGAAGGATTACCGATTTATAAAGAAATCAAAGGGAGAGGCCCATTTTCAGATGAAATTGCGCAATATGCGGTAGGAGCAGCCGTAAAATACAAATTATTGCCAAGTGTGATCCTATCGCAATACGGGTATGAATCGGCATTTGGAACGTCTCTATCTGCTAAAAACGACTTGAATTTTTTCGGAATT…
GCF_027676425.1	NZ_JAQEOI0100001271.6806.AOI_01	225.2;UviB	MEKLLGSLLSNPEQISFAVLFVGLFIWVMQQNNAREKRYQSTIDKLTNALGDMEAIKSTVEKIHEKLQ	ATGGAAAAATTATTAGGATCGTTACTCTCAAACCCCGAACAAATCAGCTTCGCTGTTTTGTTTGTGGGTTTATTTATTTGGGTAATGCAGCAGAACAACGCACGAGAAAAAAGATATCAAAGTACTATTGATAAATTGACAAATGCATTGGGCGATATGGAAGCAATCAAAAGCACTGTGGAGAAAATCCACGAAAAACTACAG
GCF_027676385.1	NZ_JAQEOK0100000331.6771.AOI_01	63.3;Enterolysin_A	MENQDESLIKQYVKRRAKRRLFLWLFGTSAGLITILITVFVTLFLILAAGSIDNSDSDSSSGGETFTGEYSEGLPIYKEIKGRGPFSDEIAQYAVGAAVKYKLLPSVILSQYGYESAFGTSASARNDLNYFGITWFDGCLFPKGTARGIGGIEGGWYMKFPNSKAAFSYYGFMVATQSNFNACVGNKSPGASLLILGRGGYAAAGITEDSPYYTGCMSIITSNKLTEYDEFAIKHWGEGGNNNGTITGEWTNPFPGSSLDKSSFSGGQLFGTNPGGEFRPNGFHDGLDFGSVDHPGSEIHAVHVGKVVYVGNPGISGLGACVIVINYDGLNMVYQEFANSTGNSCVKVGDQVKVGQVIGIRDTAHLHLGFTRMDWRQAQGHAFTGDGTWIDPLPFLNSS…	ATGGAAAATCAAGATGAAAGTTTAATCAAGCAGTATGTTAAGCGTCGCGCAAAGCGGCGCTTATTTTTGTGGTTGTTTGGTACTTCTGCAGGTTTGATTACCATTTTGATCACTGTATTCGTGACCCTATTTTTAATACTTGCGGCTGGTTCGATTGATAATTCGGATTCAGATTCAAGCAGTGGTGGCGAAACTTTTACAGGAGAGTATTCGGAAGGATTGCCCATTTATAAAGAAATCAAAGGAAGAGGCCCTTTTTCTGATGAGATTGCGCAATATGCCGTAGGTGCAGCAGTGAAATATAAATTATTACCAAGTGTGATCCTTTCTCAATACGGTTACGAATCAGCGTTTGGTACGTCGGCGTCCGCAAGAAATGATCTCAACTATTTTGGAATT…
GCF_027676495.1	NZ_JAQEOR0100000221.6940.AOI_01	63.3;Enterolysin_A	MENQNESLIKQYVKRRAKRRLFLWLFGTSAGLMTILITVFVTLFLILAAGSIDNPDSDSSSGGEAFTGEYSEGLPIYKEIKGRGPFSDEIAQYAVGAAVKYKLLPSVILSQYGYESAFGTSLSAKNDLNFFGITWLDGCLFPKGTARGIGGIEGGWYMKFPNSKAAFSYYGFMVATQSNFNESVGNKSPGASLLILGRGGYAAAGITEDSPYYTGCMSIITSNKLTEYDEFAIKHWGEGGNDNGTITGEWTNPFPGSSLDKSSFSGGQLFGTNPGGEFRPNGFHDGLDFGSVDHPGSEIHAVHGGKVVYVGNPGISGLGACVIVINYDGLNMVYQEFANSTGNSCVKVGDQVKVGQVIGIRDTAHLHLGFTRMDWRQAQGHAFTDDGTWIDPLPFLNSS…	ATGGAAAACCAAAATGAAAGTTTAATCAAGCAGTATGTTAAGCGTCGTGCAAAGCGACGCTTATTTTTGTGGTTGTTTGGTACTTCTGCAGGTTTGATGACTATTTTGATCACTGTGTTCGTGACCCTTTTTCTAATACTTGCGGCGGGTTCGATTGATAATCCGGATTCAGATTCAAGCAGTGGTGGCGAAGCTTTTACAGGAGAATATTCGGAAGGATTACCGATTTATAAAGAAATCAAAGGGAGAGGCCCATTTTCAGATGAAATTGCGCAATATGCGGTAGGAGCAGCCGTAAAATACAAATTATTGCCAAGTGTGATCCTATCGCAATACGGGTATGAATCGGCATTTGGAACGTCTCTATCTGCTAAAAACGACTTGAATTTTTTCGGAATT…
GCF_027676495.1	NZ_JAQEOR0100000361.6956.AOI_01	95.2;Enterocin_SE-K4	LILGIVLLSVSTLGITVDAATYYGNGAYCNTQKCWVDWSRARSEIVDRGVKAYVNGFTKVLGGVGGR	TTGATTTTAGGAATTGTTTTATTGAGTGTATCTACTTTAGGAATTACAGTAGATGCTGCAACTTATTATGGAAATGGTGCTTATTGTAATACTCAAAAATGTTGGGTAGATTGGAGTAGAGCTCGCTCTGAGATTGTTGATAGAGGAGTAAAAGCTTACGTTAATGGTTTTACGAAAGTGCTAGGTGGAGTCGGTGGAAGA
GCF_027675915.1	NZ_JAQEPF0100000091.6607.AOI_01	225.2;UviB	MEKLLGSLLSNPEQISFAVLFVGLFIWVMQQNNAREKRYQSTIDKLTNALGDMEAIKSTVEKIHEKLQ	ATGGAAAAATTATTAGGATCGTTACTCTCAAACCCCGAACAAATCAGCTTCGCTGTTTTGTTTGTGGGTTTATTTATTTGGGTAATGCAGCAGAACAACGCACGAGAAAAAAGATATCAAAGTACTATTGATAAATTGACAAATGCATTGGGCGATATGGAAGCAATCAAAAGCACTGTGGAGAAAATCCACGAAAAACTACAG
GCF_027675915.1	NZ_JAQEPF0100000441.6622.AOI_01	95.2;Enterocin_SE-K4	LILGIVLLSVSTLGITVDAATYYGNGVYCNTQKCWVDWSRARSEIVDRGVKAYVNGFTKVLGGVGGR	TTGATTTTAGGAATTGTTTTATTGAGTGTATCTACTTTAGGAATTACAGTAGATGCTGCAACTTATTATGGAAATGGTGTTTATTGTAATACTCAAAAATGTTGGGTAGATTGGAGTAGAGCTCGCTCTGAGATTGTTGATAGAGGAGTAAAAGCTTACGTTAATGGTTTTACGAAAGTGCTAGGTGGAGTCGGTGGAAGA
GCF_027675805.1	NZ_JAQEPM0100000191.6552.AOI_01	63.3;Enterolysin_A	MENQNESLIKQYVKRRAKRRLFLWLFGTSAGLITILITVFVTLFLILAAGSIDNSDSDSSSGGEAFTGEYSEGLPIYKEIKGRGPFSDEIAQYAVGAAVKYKLLPSVILSQYGYESAFGTSASARNDLNYFGITWFDGCLFPKGTARGIGGIESGWYMKFPNSKAAFSYYGFMVATQSNFNACVGNKSPGASLLILGRGGYAAAGITEDSPYYTGCMSIITSNKLTEYDEFAIKHWGEGGNNNGTITGEWTNPFPGSSLDKSSFSGGQLFGTNPGGEFRPNGFHDGLDFGSVDHPGSEIHAVHGGKVVYVGNPGISGLGACVIVINYDGLNMVYQEFANSTGNSRVKVGDQVKVGQVIGIRDTAHLHLGFTRMDWRQAQGHAFTDDGTWIDPLPFLNSS…	ATGGAAAACCAAAATGAAAGTTTAATCAAGCAGTATGTTAAGCGTCGTGCAAAGCGACGCTTATTTTTGTGGTTGTTTGGTACTTCTGCAGGTTTGATTACTATTTTGATTACTGTGTTCGTGACCCTTTTTCTAATACTTGCGGCGGGTTCGATTGATAATTCTGATTCAGATTCAAGTAGTGGTGGCGAAGCTTTTACAGGAGAATATTCGGAAGGATTACCCATTTATAAAGAAATCAAAGGAAGAGGCCCTTTTTCTGATGAGATTGCGCAATATGCCGTAGGTGCAGCAGTGAAATATAAATTATTACCAAGTGTAATCCTTTCTCAATACGGTTACGAATCAGCGTTTGGTACGTCGGCGTCCGCAAGAAATGATCTCAACTATTTTGGGATT…
GCF_027675805.1	NZ_JAQEPM0100000191.6552.AOI_02	95.2;Enterocin_SE-K4	LILGIVLLSVSTLGITVDAATYYGNGAYCNTQKCWVDWSRARSEIVDRGVKAYVNGFTKVLGGVGGR	TTGATTTTAGGAATTGTTTTATTGAGTGTATCTACTTTAGGAATTACAGTAGATGCTGCAACTTATTATGGAAATGGTGCTTATTGTAATACTCAAAAATGTTGGGTAGATTGGAGTAGAGCTCGCTCTGAGATTGTTGATAGAGGAGTAAAAGCTTACGTTAATGGTTTTACGAAAGTGCTAGGTGGAGTCGGTGGAAGA
GCF_027675725.1	NZ_JAQEPN0100000451.6340.AOI_01	95.2;Enterocin_SE-K4	LILGIVLLSVSTLGITVDAATYYGNGVYCNTQKCWVDWSRARSEIVDRGVKAYVNGFTKVLGGVGGR	TTGATTTTAGGAATTGTTTTATTGAGTGTATCTACTTTAGGAATTACAGTAGATGCTGCAACTTATTATGGAAATGGTGTTTATTGTAATACTCAAAAATGTTGGGTAGATTGGAGTAGAGCTCGCTCTGAGATTGTTGATAGAGGAGTAAAAGCTTACGTTAATGGTTTTACGAAAGTGCTAGGTGGAGTCGGTGGAAGA
GCF_027675725.1	NZ_JAQEPN0100000731.6330.AOI_01	225.2;UviB	MEKLLGSLLSNPEQISFAVLFVGLFIWVMQQNNAREKRYQSTIDKLTNALGDMEAIKSTVEKIHEKLQ	ATGGAAAAATTATTAGGATCGTTACTCTCAAACCCCGAACAAATCAGCTTCGCTGTTTTGTTTGTGGGTTTATTTATTTGGGTAATGCAGCAGAACAACGCACGAGAAAAAAGATATCAAAGTACTATTGATAAATTGACAAATGCATTGGGCGATATGGAAGCAATCAAAAGCACTGTGGAGAAAATCCACGAAAAACTACAG
GCF_027675745.1	NZ_JAQEPP0100000101.6426.AOI_01	225.2;UviB	MEKLLGSLLSNPEQISFAVLFVGLFIWVMQQNNAREKRYQSTIDKLTNALGDMEAIKSTVEKIHEKLQ	ATGGAAAAATTATTAGGATCGTTACTCTCAAACCCCGAACAAATCAGCTTCGCTGTTTTGTTTGTGGGTTTATTTATTTGGGTAATGCAGCAGAACAACGCACGAGAAAAAAGATATCAAAGTACTATTGATAAATTGACAAATGCATTGGGCGATATGGAAGCAATCAAAAGCACTGTGGAGAAAATCCACGAAAAACTACAG
GCF_027675745.1	NZ_JAQEPP0100000431.6440.AOI_01	95.2;Enterocin_SE-K4	LILGIVLLSVSTLGITVDAATYYGNGVYCNTQKCWVDWSRARSEIVDRGVKAYVNGFTKVLGGVGGR	TTGATTTTAGGAATTGTTTTATTGAGTGTATCTACTTTAGGAATTACAGTAGATGCTGCAACTTATTATGGAAATGGTGTTTATTGTAATACTCAAAAATGTTGGGTAGATTGGAGTAGAGCTCGCTCTGAGATTGTTGATAGAGGAGTAAAAGCTTACGTTAATGGTTTTACGAAAGTGCTAGGTGGAGTCGGTGGAAGA
GCF_027675735.1	NZ_JAQEPQ0100000451.6414.AOI_01	95.2;Enterocin_SE-K4	LILGIVLLSVSTLGITVDAATYYGNGVYCNTQKCWVDWSRARSEIVDRGVKAYVNGFTKVLGGVGGR	TTGATTTTAGGAATTGTTTTATTGAGTGTATCTACTTTAGGAATTACAGTAGATGCTGCAACTTATTATGGAAATGGTGTTTATTGTAATACTCAAAAATGTTGGGTAGATTGGAGTAGAGCTCGCTCTGAGATTGTTGATAGAGGAGTAAAAGCTTACGTTAATGGTTTTACGAAAGTGCTAGGTGGAGTCGGTGGAAGA
GCF_027675735.1	NZ_JAQEPQ0100000741.6357.AOI_01	225.2;UviB	MEKLLGSLLSNPEQISFAVLFVGLFIWVMQQNNAREKRYQSTIDKLTNALGDMEAIKSTVEKIHEKLQ	ATGGAAAAATTATTAGGATCGTTACTCTCAAACCCCGAACAAATCAGCTTCGCTGTTTTGTTTGTGGGTTTATTTATTTGGGTAATGCAGCAGAACAACGCACGAGAAAAAAGATATCAAAGTACTATTGATAAATTGACAAATGCATTGGGCGATATGGAAGCAATCAAAAGCACTGTGGAGAAAATCCACGAAAAACTACAG
GCF_027675645.1	NZ_JAQEPR0100000451.6247.AOI_01	95.2;Enterocin_SE-K4	LILGIVLLSVSTLGITVDAATYYGNGVYCNTQKCWVDWSRARSEIVDRGVKAYVNGFTKVLGGVGGR	TTGATTTTAGGAATTGTTTTATTGAGTGTATCTACTTTAGGAATTACAGTAGATGCTGCAACTTATTATGGAAATGGTGTTTATTGTAATACTCAAAAATGTTGGGTAGATTGGAGTAGAGCTCGCTCTGAGATTGTTGATAGAGGAGTAAAAGCTTACGTTAATGGTTTTACGAAAGTGCTAGGTGGAGTCGGTGGAAGA
GCF_027675645.1	NZ_JAQEPR0100000731.6237.AOI_01	225.2;UviB	MEKLLGSLLSNPEQISFAVLFVGLFIWVMQQNNAREKRYQSTIDKLTNALGDMEAIKSTVEKIHEKLQ	ATGGAAAAATTATTAGGATCGTTACTCTCAAACCCCGAACAAATCAGCTTCGCTGTTTTGTTTGTGGGTTTATTTATTTGGGTAATGCAGCAGAACAACGCACGAGAAAAAAGATATCAAAGTACTATTGATAAATTGACAAATGCATTGGGCGATATGGAAGCAATCAAAAGCACTGTGGAGAAAATCCACGAAAAACTACAG
GCF_027675565.1	NZ_JAQEPV0100000201.6192.AOI_01	63.3;Enterolysin_A	MENQNESLIKQYVKRRAKRRLFLWLFGTSAGLMTILITVFVTLFLILAAGSIDNPDSDSSSGGEAFTGEYSEGLPIYKEIKGRGPFSDEIAQYAVGAAVKYKLLPSVILSQYGYESAFGTSLSAKNDLNFFGITWLDGCLFPKGTARGIGGIEGGWYMKFPNSKAAFSYYGFMVATQSNFNESVGNKSPGASLLILGRGGYAAAGITEDSPYYTGCMSIITSNKLTEYDEFAIKHWGEGGNDNGTITGEWTNPFPGSSLDKSSFSGGQLFGTNPGGEFRPNGFHDGLDFGSVDHPGSEIHAVHGGKVVYVGNPGISGLGACVIVINYDGLNMVYQEFANSTGNSCVKVGDQVKVGQVIGIRDTAHLHLGFTRMDWRQAQGHAFTDDGTWIDPLPFLNSS…	ATGGAAAACCAAAATGAAAGTTTAATCAAGCAGTATGTTAAGCGTCGTGCAAAGCGACGCTTATTTTTGTGGTTGTTTGGTACTTCTGCAGGTTTGATGACTATTTTGATCACTGTGTTCGTGACCCTTTTTCTAATACTTGCGGCGGGTTCGATTGATAATCCGGATTCAGATTCAAGCAGTGGTGGCGAAGCTTTTACAGGAGAATATTCGGAAGGATTACCGATTTATAAAGAAATCAAAGGGAGAGGCCCATTTTCAGATGAAATTGCGCAATATGCGGTAGGAGCAGCCGTAAAATACAAATTATTGCCAAGTGTGATCCTATCGCAATACGGGTATGAATCGGCATTTGGAACGTCTCTATCTGCTAAAAACGACTTGAATTTTTTCGGAATT…
GCF_027693985.1	NZ_JAQEWC0100000241.8692.AOI_01	63.3;Enterolysin_A	MENQNESLIKQYVKRRAKRRLFLWLFGTSAGLITILITVFVTLFLILAAGSIDNSDSDSSSGGEAFTGEYSEGLPIYKEIKGRGPFSDEIAQYAVGAAVKYKLLPSVILSQYGYESAFGTSASARNDLNYFGITWFDGCLFPKGTARGIGGIEGGWYMKFPNSKATFSYYGFMVATQSNFNACVGNKSPGASLLILGRGGYAAAGITEDSPYYTGCMSIITSNKLTEYDEFAIKHWGEGGNNNGTITGEWTNPFPGSSLDKSSFSGGQLFGTNPGGEFRPNGFHDGLDFGSVDHQGSEIHAVHGGKVVYVGNPGISGLGACVIVINYDGLNMVYQEFANSTGNSRVKVGDQVKVGQVIGIRDTAHLHLGFTRMDWRQAQGHAFTGDGTWIDPLPFLNSS…	ATGGAAAACCAAAATGAAAGTTTAATCAAGCAGTATGTTAAGCGTCGTGCAAAGCGACGCTTATTTTTGTGGTTGTTTGGTACTTCTGCAGGTTTGATTACTATTTTGATTACTGTGTTCGTGACCCTTTTTCTAATACTTGCGGCGGGTTCGATTGATAATTCTGATTCAGATTCAAGTAGTGGTGGCGAAGCTTTTACAGGAGAATATTCGGAAGGATTACCCATTTATAAAGAAATCAAAGGAAGAGGCCCTTTTTCTGATGAGATTGCGCAATATGCCGTAGGTGCAGCAGTGAAGTATAAATTATTACCAAGTGTGATCCTTTCGCAATACGGGTATGAATCAGCGTTTGGTACGTCGGCGTCTGCAAGAAATGATCTCAATTATTTTGGGATT…
GCF_027693985.1	NZ_JAQEWC0100000411.8697.AOI_01	91.2;Enterocin_P	MRKKLFSLALIGIFGLVVTNFGTKVDAATRSYGNGVYCNNSKCWVNWGEAKENIAGIVISGWASGLAGMGH	ATGAGAAAAAAATTATTTAGTTTAGCTCTTATTGGAATATTTGGGTTAGTTGTGACAAATTTTGGTACAAAAGTTGATGCAGCTACGCGTTCATATGGTAATGGTGTTTATTGTAATAATAGTAAATGCTGGGTTAACTGGGGAGAAGCTAAAGAGAATATTGCAGGAATCGTTATTAGTGGCTGGGCTTCTGGTTTGGCAGGTATGGGACAT
GCF_027693085.1	NZ_JAQEXP0100000251.8610.AOI_01	63.3;Enterolysin_A	MENQNESLIKQYVKRRAKRRLFLWLFGTSAGLITILITVFVTLFLILAAGSIDNSDSDSSSGGEAFTGEYSEGLPIYKEIKGRGPFSDEIAQYAVGAAVKYKLLPSVILSQYGYESAFGTSASARNDLNYFGITWFDGCLFPKGTARGIGGIEGGWYMKFPNSKATFSYYGFMVATQSNFNACVGNKSPGASLLILGRGGYAAAGITEDSPYYTGCMSIITSNKLTEYDEFAIKHWGEGGNNNGTITGEWTNPFPGSSLDKSSFSGGQLFGTNPGGEFRPNGFHDGLDFGSVDHQGSEIHAVHGGKVVYVGNPGISGLGACVIVINYDGLNMVYQEFANSTGNSRVKVGDQVKVGQVIGIRDTAHLHLGFTRMDWRQAQGHAFTGDGTWIDPLPFLNSS…	ATGGAAAACCAAAATGAAAGTTTAATCAAGCAGTATGTTAAGCGTCGTGCAAAGCGACGCTTATTTTTGTGGTTGTTTGGTACTTCTGCAGGTTTGATTACTATTTTGATTACTGTGTTCGTGACCCTTTTTCTAATACTTGCGGCGGGTTCGATTGATAATTCTGATTCAGATTCAAGTAGTGGTGGCGAAGCTTTTACAGGAGAATATTCGGAAGGATTACCCATTTATAAAGAAATCAAAGGAAGAGGCCCTTTTTCTGATGAGATTGCGCAATATGCCGTAGGTGCAGCAGTGAAGTATAAATTATTACCAAGTGTGATCCTTTCGCAATACGGGTATGAATCAGCGTTTGGTACGTCGGCGTCTGCAAGAAATGATCTCAATTATTTTGGGATT…
GCF_027693085.1	NZ_JAQEXP0100000511.8641.AOI_01	91.2;Enterocin_P	MRKKLFSLALIGIFGLVVTNFGTKVDAATRSYGNGVYCNNSKCWVNWGEAKENIAGIVISGWASGLAGMGH	ATGAGAAAAAAATTATTTAGTTTAGCTCTTATTGGAATATTTGGGTTAGTTGTGACAAATTTTGGTACAAAAGTTGATGCAGCTACGCGTTCATATGGTAATGGTGTTTATTGTAATAATAGTAAATGCTGGGTTAACTGGGGAGAAGCTAAAGAGAATATTGCAGGAATCGTTATTAGTGGCTGGGCTTCTGGTTTGGCAGGTATGGGACAT
GCF_027693025.1	NZ_JAQEXS0100000251.8563.AOI_01	63.3;Enterolysin_A	MENQNESLIKQYVKRRAKRRLFLWLFGTSAGLITILITVFVTLFLILAAGSIDNSDSDSSSGGEAFTGEYSEGLPIYKEIKGRGPFSDEIAQYAVGAAVKYKLLPSVILSQYGYESAFGTSASARNDLNYFGITWFDGCLFPKGTARGIGGIEGGWYMKFPNSKATFSYYGFMVATQSNFNACVGNKSPGASLLILGRGGYAAAGITEDSPYYTGCMSIITSNKLTEYDEFAIKHWGEGGNNNGTITGEWTNPFPGSSLDKSSFSGGQLFGTNPGGEFRPNGFHDGLDFGSVDHQGSEIHAVHGGKVVYVGNPGISGLGACVIVINYDGLNMVYQEFANSTGNSRVKVGDQVKVGQVIGIRDTAHLHLGFTRMDWRQAQGHAFTGDGTWIDPLPFLNSS…	ATGGAAAACCAAAATGAAAGTTTAATCAAGCAGTATGTTAAGCGTCGTGCAAAGCGACGCTTATTTTTGTGGTTGTTTGGTACTTCTGCAGGTTTGATTACTATTTTGATTACTGTGTTCGTGACCCTTTTTCTAATACTTGCGGCGGGTTCGATTGATAATTCTGATTCAGATTCAAGTAGTGGTGGCGAAGCTTTTACAGGAGAATATTCGGAAGGATTACCCATTTATAAAGAAATCAAAGGAAGAGGCCCTTTTTCTGATGAGATTGCGCAATATGCCGTAGGTGCAGCAGTGAAGTATAAATTATTACCAAGTGTGATCCTTTCGCAATACGGGTATGAATCAGCGTTTGGTACGTCGGCGTCTGCAAGAAATGATCTCAATTATTTTGGGATT…
GCF_027693025.1	NZ_JAQEXS0100000421.8588.AOI_01	91.2;Enterocin_P	MRKKLFSLALIGIFGLVVTNFGTKVDAATRSYGNGVYCNNSKCWVNWGEAKENIAGIVISGWASGLAGMGH	ATGAGAAAAAAATTATTTAGTTTAGCTCTTATTGGAATATTTGGGTTAGTTGTGACAAATTTTGGTACAAAAGTTGATGCAGCTACGCGTTCATATGGTAATGGTGTTTATTGTAATAATAGTAAATGCTGGGTTAACTGGGGAGAAGCTAAAGAGAATATTGCAGGAATCGTTATTAGTGGCTGGGCTTCTGGTTTGGCAGGTATGGGACAT
GCF_027692905.1	NZ_JAQEXY0100000201.8499.AOI_01	63.3;Enterolysin_A	MENQNESLIKQYVKRRAKRRLFLWLFGTSAGLITILITVFVTLFLILAAGSIDNSDSDSSSGGEAFTGEYSEGLPIYKEIKGRGPFSDEIAQYAVGAAVKYKLLPSVILSQYGYESAFGTSASARNDLNYFGITWFDGCLFPKGTARGIGGIEGGWYMKFPNSKATFSYYGFMVATQSNFNACVGNKSPGASLLILGRGGYAAAGITEDSPYYTGCMSIITSNKLTEYDEFAIKHWGEGGNNNGTITGEWTNPFPGSSLDKSSFSGGQLFGTNPGGEFRPNGFHDGLDFGSVDHQGSEIHAVHGGKVVYVGNPGISGLGACVIVINYDGLNMVYQEFANSTGNSRVKVGDQVKVGQVIGIRDTAHLHLGFTRMDWRQAQGHAFTGDGTWIDPLPFLNSS…	ATGGAAAACCAAAATGAAAGTTTAATCAAGCAGTATGTTAAGCGTCGTGCAAAGCGACGCTTATTTTTGTGGTTGTTTGGTACTTCTGCAGGTTTGATTACTATTTTGATTACTGTGTTCGTGACCCTTTTTCTAATACTTGCGGCGGGTTCGATTGATAATTCTGATTCAGATTCAAGTAGTGGTGGCGAAGCTTTTACAGGAGAATATTCGGAAGGATTACCCATTTATAAAGAAATCAAAGGAAGAGGCCCTTTTTCTGATGAGATTGCGCAATATGCCGTAGGTGCAGCAGTGAAGTATAAATTATTACCAAGTGTGATCCTTTCGCAATACGGGTATGAATCAGCGTTTGGTACGTCGGCGTCTGCAAGAAATGATCTCAATTATTTTGGGATT…
GCF_027692905.1	NZ_JAQEXY0100000391.8528.AOI_01	91.2;Enterocin_P	MRKKLFSLALIGIFGLVVTNFGTKVDAATRSYGNGVYCNNSKCWVNWGEAKENIAGIVISGWASGLAGMGH	ATGAGAAAAAAATTATTTAGTTTAGCTCTTATTGGAATATTTGGGTTAGTTGTGACAAATTTTGGTACAAAAGTTGATGCAGCTACGCGTTCATATGGTAATGGTGTTTATTGTAATAATAGTAAATGCTGGGTTAACTGGGGAGAAGCTAAAGAGAATATTGCAGGAATCGTTATTAGTGGCTGGGCTTCTGGTTTGGCAGGTATGGGACAT
GCF_027691345.1	NZ_JAQFAY0100000231.8487.AOI_01	63.3;Enterolysin_A	MENQNESLIKQYVKRRAKRRLFLWLFGTSAGLITILITVFVTLFLILAAGSIDNSDSDSSSGGEAFTGEYSEGLPIYKEIKGRGPFSDEIAQYAVGAAVKYKLLPSVILSQYGYESAFGTSASARNDLNYFGITWFDGCLFPKGTARGIGGIEGGWYMKFPNSKATFSYYGFMVATQSNFNACVGNKSPGASLLILGRGGYAAAGITEDSPYYTGCMSIITSNKLTEYDEFAIKHWGEGGNNNGTITGEWTNPFPGSSLDKSSFSGGQLFGTNPGGEFRPNGFHDGLDFGSVDHQGSEIHAVHGGKVVYVGNPGISGLGACVIVINYDGLNMVYQEFANSTGNSRVKVGDQVKVGQVIGIRDTAHLHLGFTRMDWRQAQGHAFTGDGTWIDPLPFLNSS…	ATGGAAAACCAAAATGAAAGTTTAATCAAGCAGTATGTTAAGCGTCGTGCAAAGCGACGCTTATTTTTGTGGTTGTTTGGTACTTCTGCAGGTTTGATTACTATTTTGATTACTGTGTTCGTGACCCTTTTTCTAATACTTGCGGCGGGTTCGATTGATAATTCTGATTCAGATTCAAGTAGTGGTGGCGAAGCTTTTACAGGAGAATATTCGGAAGGATTACCCATTTATAAAGAAATCAAAGGAAGAGGCCCTTTTTCTGATGAGATTGCGCAATATGCCGTAGGTGCAGCAGTGAAGTATAAATTATTACCAAGTGTGATCCTTTCGCAATACGGGTATGAATCAGCGTTTGGTACGTCGGCGTCTGCAAGAAATGATCTCAATTATTTTGGGATT…
GCF_027691345.1	NZ_JAQFAY0100000441.8475.AOI_01	91.2;Enterocin_P	MRKKLFSLALIGIFGLVVTNFGTKVDAATRSYGNGVYCNNSKCWVNWGEAKENIAGIVISGWASGLAGMGH	ATGAGAAAAAAATTATTTAGTTTAGCTCTTATTGGAATATTTGGGTTAGTTGTGACAAATTTTGGTACAAAAGTTGATGCAGCTACGCGTTCATATGGTAATGGTGTTTATTGTAATAATAGTAAATGCTGGGTTAACTGGGGAGAAGCTAAAGAGAATATTGCAGGAATCGTTATTAGTGGCTGGGCTTCTGGTTTGGCAGGTATGGGACAT
GCF_027691285.1	NZ_JAQFBA0100000161.8401.AOI_01	95.2;Enterocin_SE-K4	LILGIVLLSVSTLGITVDAATYYGNGVYCNTQKCWVDWSRARSEIVDRGVKAYVNGFTKVLGGVGGR	TTGATTTTAGGAATTGTTTTATTGAGTGTATCTACTTTAGGAATTACAGTAGATGCTGCAACTTATTATGGAAATGGTGTTTATTGTAATACTCAAAAATGTTGGGTAGATTGGAGTAGAGCTCGCTCTGAGATTGTTGATAGAGGAGTAAAAGCTTACGTTAATGGTTTTACGAAAGTGCTAGGTGGAGTCGGTGGAAGA
GCF_027691285.1	NZ_JAQFBA0100000161.8401.AOI_02	63.3;Enterolysin_A	MENQDESLIKQYVKRRAKRRLFLWLFGTSAGLITILITVFVTLFLILAAGSIDNSDSDSSSGGETFTGEYSEGLPIYKEIKGRGPFSDEIAQYAVGAAVKYKLLPSVILSQYGYESAFGTSASARNDLNYFGITWFDGCLFPKGTARGIGGIEGGWYMKFPNSKAAFSYYGFMVATQSNFNACVGNKSPGASLLILGRGGYAAAGITEDSPYYTGCMSIITSNKLTEYDEFAIKHWGEGGNNNGTITGEWTNPFPGSSLDKSSFSGGQLFGTNPGGEFRPNGFHDGLDFGSVDHPGSEIHAVHVGKVVYVGNPGISGLGACVIVINYDGLNMVYQEFANSTGNSCVKVGDQVKVGQVIGIRDTAHLHLGFTRMDWRQAQGHAFTGDGTWIDPLPFLNSS…	ATGGAAAATCAAGATGAAAGTTTAATCAAGCAGTATGTTAAGCGTCGCGCAAAGCGGCGCTTATTTTTGTGGTTGTTTGGTACTTCTGCAGGTTTGATTACCATTTTGATCACTGTATTCGTGACCCTATTTTTAATACTTGCGGCTGGTTCGATTGATAATTCGGATTCAGATTCAAGCAGTGGTGGCGAAACTTTTACAGGAGAGTATTCGGAAGGATTGCCCATTTATAAAGAAATCAAAGGAAGAGGCCCTTTTTCTGATGAGATTGCGCAATATGCCGTAGGTGCAGCAGTGAAATATAAATTATTACCAAGTGTAATCCTTTCTCAATACGGTTACGAATCAGCGTTTGGTACGTCGGCGTCCGCAAGAAATGATCTCAACTATTTTGGAATT…
GCF_027691285.1	NZ_JAQFBA0100000501.8397.AOI_01	16.2;Bacteriocin_31	MNFLGKDNMKKKFVSIFMILGIVLLSVSTLGITVDAATYYGNGVYCNKQKCWVDWNKASKEIGKIIVNGWVQHGPWAPR	ATGAATTTTTTAGGGAAGGACAATATGAAGAAAAAATTTGTTAGTATTTTTATGATTTTAGGAATTGTTTTATTGAGTGTATCTACTTTAGGAATTACAGTAGATGCTGCAACTTATTATGGAAATGGTGTATATTGTAATAAACAAAAATGTTGGGTAGATTGGAATAAAGCTTCAAAAGAAATAGGAAAAATTATTGTTAATGGTTGGGTGCAACATGGACCTTGGGCTCCTAGA
GCF_027691285.1	NZ_JAQFBA0100000501.8397.AOI_01	51.2;Carnocin_CP52	MDKQQELLNLLSKAYNDPKINEYEGLKDKLFECASRLTNNEVNIGEVCYKLSTIISKYLVTHNFKITESIIELQNFVTKESQKYRGWASIGIWS	ATGGACAAGCAACAAGAATTACTGAATTTACTTAGTAAAGCGTATAATGATCCTAAAATAAATGAATACGAAGGGTTAAAAGATAAGTTATTTGAATGTGCAAGCAGATTAACAAATAACGAAGTAAATATCGGTGAAGTTTGTTATAAATTAAGTACAATTATCAGTAAATATCTAGTAACACATAATTTTAAAATAACTGAATCAATTATTGAATTGCAAAATTTTGTGACTAAAGAGAGCCAAAAATATAGGGGATGGGCGTCTATCGGTATTTGGAGT
GCF_027691285.1	NZ_JAQFBA0100000551.8449.AOI_01	91.2;Enterocin_P	MRKKLFSLTLIGKFGLVVTNFGTKVDAATRSYGNGVYCSNSKCWVNWGEAKENIAGIVISGWASGLAGMGH	ATGAGAAAAAAATTATTTAGTTTAACTCTTATTGGAAAGTTTGGATTAGTTGTGACGAATTTTGGTACAAAAGTTGATGCAGCTACGCGTTCATATGGTAATGGTGTTTATTGTAGTAATAGTAAGTGCTGGGTTAACTGGGGAGAAGCTAAAGAAAATATTGCAGGAATTGTTATTAGTGGCTGGGCTTCTGGCTTGGCAGGTATGGGACAT
GCF_027691115.1	NZ_JAQFBF0100000161.8388.AOI_01	95.2;Enterocin_SE-K4	LILGIVLLSVSTLGITVDAATYYGNGVYCNTQKCWVDWSRARSEIVDRGVKAYVNGFTKVLGGVGGR	TTGATTTTAGGAATTGTTTTATTGAGTGTATCTACTTTAGGAATTACAGTAGATGCTGCAACTTATTATGGAAATGGTGTTTATTGTAATACTCAAAAATGTTGGGTAGATTGGAGTAGAGCTCGCTCTGAGATTGTTGATAGAGGAGTAAAAGCTTACGTTAATGGTTTTACGAAAGTGCTAGGTGGAGTCGGTGGAAGA
GCF_027691115.1	NZ_JAQFBF0100000161.8388.AOI_02	63.3;Enterolysin_A	MENQDESLIKQYVKRRAKRRLFLWLFGTSAGLITILITVFVTLFLILAAGSIDNSDSDSSSGGETFTGEYSEGLPIYKEIKGRGPFSDEIAQYAVGAAVKYKLLPSVILSQYGYESAFGTSASARNDLNYFGITWFDGCLFPKGTARGIGGIEGGWYMKFPNSKAAFSYYGFMVATQSNFNACVGNKSPGASLLILGRGGYAAAGITEDSPYYTGCMSIITSNKLTEYDEFAIKHWGEGGNNNGTITGEWTNPFPGSSLDKSSFSGGQLFGTNPGGEFRPNGFHDGLDFGSVDHPGSEIHAVHVGKVVYVGNPGISGLGACVIVINYDGLNMVYQEFANSTGNSCVKVGDQVKVGQVIGIRDTAHLHLGFTRMDWRQAQGHAFTGDGTWIDPLPFLNSS…	ATGGAAAATCAAGATGAAAGTTTAATCAAGCAGTATGTTAAGCGTCGCGCAAAGCGGCGCTTATTTTTGTGGTTGTTTGGTACTTCTGCAGGTTTGATTACCATTTTGATCACTGTATTCGTGACCCTATTTTTAATACTTGCGGCTGGTTCGATTGATAATTCGGATTCAGATTCAAGCAGTGGTGGCGAAACTTTTACAGGAGAGTATTCGGAAGGATTGCCCATTTATAAAGAAATCAAAGGAAGAGGCCCTTTTTCTGATGAGATTGCGCAATATGCCGTAGGTGCAGCAGTGAAATATAAATTATTACCAAGTGTAATCCTTTCTCAATACGGTTACGAATCAGCGTTTGGTACGTCGGCGTCCGCAAGAAATGATCTCAACTATTTTGGAATT…
GCF_027691115.1	NZ_JAQFBF0100000321.8382.AOI_01	86.2;Enterocin_L50a	VIYNYYEQKNDWRSYIMGAIAKLVAKFGWPIVKKYYKQIMQFIGEGWAINKIIEWIKKHI	GTGATATACAATTATTATGAACAAAAAAATGATTGGAGGAGTTATATTATGGGAGCAATCGCAAAATTAGTAGCAAAGTTTGGGTGGCCTATTGTTAAAAAGTATTACAAACAAATTATGCAGTTTATTGGAGAAGGATGGGCAATTAACAAAATCATTGAGTGGATTAAAAAACATATT
GCF_027691115.1	NZ_JAQFBF0100000321.8382.AOI_01	87.2;Enterocin_L50b	MGAIAKLVTKFGWPLIKKFYKQIMQFIGQGWTIDQIEKWLKRH	ATGGGAGCAATCGCAAAACTAGTGACAAAGTTTGGGTGGCCACTAATCAAAAAATTCTACAAACAAATCATGCAATTTATTGGACAAGGATGGACAATAGATCAAATTGAAAAATGGCTAAAAAGACAT
GCF_027691115.1	NZ_JAQFBF0100000421.8376.AOI_01	16.2;Bacteriocin_31	MNFLGKDNMKKKFVSIFMILGIVLLSVSTLGITVDAATYYGNGVYCNKQKCWVDWNKASKEIGKIIVNGWVQHGPWAPR	ATGAATTTTTTAGGGAAGGACAATATGAAGAAAAAATTTGTTAGTATTTTTATGATTTTAGGAATTGTTTTATTGAGTGTATCTACTTTAGGAATTACAGTAGATGCTGCAACTTATTATGGAAATGGTGTATATTGTAATAAACAAAAATGTTGGGTAGATTGGAATAAAGCTTCAAAAGAAATAGGAAAAATTATTGTTAATGGTTGGGTGCAACATGGACCTTGGGCTCCTAGA
GCF_027691115.1	NZ_JAQFBF0100000421.8376.AOI_01	51.2;Carnocin_CP52	MDKQQELLNLLSKAYNDPKINEYEGLKDKLFECASRLTNNEVNIGEVCYKLSTIISKYLVTHNFKITESIIELQNFVTKESQKYRGWASIGIWS	ATGGACAAGCAACAAGAATTACTGAATTTACTTAGTAAAGCGTATAATGATCCTAAAATAAATGAATACGAAGGGTTAAAAGATAAGTTATTTGAATGTGCAAGCAGATTAACAAATAACGAAGTAAATATCGGTGAAGTTTGTTATAAATTAAGTACAATTATCAGTAAATATCTAGTAACACATAATTTTAAAATAACTGAATCAATTATTGAATTGCAAAATTTTGTGACTAAAGAGAGCCAAAAATATAGGGGATGGGCGTCTATCGGTATTTGGAGT
GCF_027691115.1	NZ_JAQFBF0100000481.8381.AOI_01	91.2;Enterocin_P	MRKKLFSLTLIGKFGLVVTNFGTKVDAATRSYGNGVYCSNSKCWVNWGEAKENIAGIVISGWASGLAGMGH	ATGAGAAAAAAATTATTTAGTTTAACTCTTATTGGAAAGTTTGGATTAGTTGTGACGAATTTTGGTACAAAAGTTGATGCAGCTACGCGTTCATATGGTAATGGTGTTTATTGTAGTAATAGTAAGTGCTGGGTTAACTGGGGAGAAGCTAAAGAAAATATTGCAGGAATTGTTATTAGTGGCTGGGCTTCTGGCTTGGCAGGTATGGGACAT
GCF_028826015.1	NZ_JARAOS0100001231.8927.AOI_01	63.3;Enterolysin_A	VKYKLLPSVILSQYGYESAFGTSASARNDLNYFGITWFDGCLFPKGTARGIGGIEGGWYMKFPNSKAAFSYYGFMVATQSNFNESVGNKSPGASLLILGRGGYAAAGITEDSPYYTGCMSIITSNKLTEYDEFAIKHWGEGGNDNGTITGEWTNPFPGSSLDKSSFSGGQLFGTNPGGEFRPNGFHDGLDFGSVDHPGSEIHAVHGGKVVYVGNPGISGLGACVIVINYDGLNMVYQEFANSTGNSCVKVGDQVKVGQVIGIRDTAHLHLGFTRMDWRQAQGHAFTDDGTWIDPLPFLNSSKK	GTGAAATATAAATTATTACCAAGTGTAATCCTTTCTCAATACGGTTACGAATCAGCGTTTGGTACGTCGGCGTCCGCAAGAAATGATCTCAACTATTTTGGGATTACGTGGTTTGATGGGTGTCTGTTTCCTAAAGGAACTGCGCGAGGAATCGGTGGTATTGAAGGTGGCTGGTACATGAAGTTTCCCAACTCAAAAGCCGCATTCTCTTATTACGGCTTTATGGTAGCTACGCAGTCAAACTTTAATGAAAGCGTAGGAAATAAAAGCCCTGGCGCAAGCTTATTGATTTTAGGACGAGGTGGTTATGCCGCTGCAGGAATCACTGAAGATAGTCCTTATTATACAGGTTGTATGTCGATTATTACCTCAAATAAATTAACAGAATATGATGAATTT…
GCF_031929285.1	NZ_JARQAW0100000251.13359.AOI_01	63.3;Enterolysin_A	MENQNESLIKQYVKRRAKRRLFLWLFGTSAGLITILITVFVTLFLILAAGSIDNSDSDSSSGGETFTGEYSEGLPIYKEIKGRGPFSDEIAQYAVGAAVKYKLLPSVILSQYGYESAFGTSASARNDLNYFGITWFDGCLFPKGTARGIGGIEGGWYMKFPNSKAAFSYYGFMVATQSNFNACVGNKSPGASLLILGRGGYAAAGITEDSPYYTGCMSIITSNKLTEYDEFAIKHWGEGGNNNGTITGEWTNPFPGSSLDKSSFSGGQLFGTNPGGEFRPNGFHDGLDFGSVDHQGSEIHAVHGGKVVYVGNPGISGLGACVIVINYDGLNMVYQEFANSTGNSRVKVGDQVKVGQVIGIRDTAHLHLGFTRMDWRQAQGHAFTDDGTWIDPLPFLNSS…	ATGGAAAACCAAAATGAAAGTTTAATCAAGCAGTATGTTAAGCGTCGTGCAAAGCGACGCTTATTTTTGTGGTTGTTTGGTACTTCTGCAGGTTTGATTACCATTTTGATCACTGTATTCGTGACCCTATTTTTAATACTTGCGGCTGGTTCGATTGATAATTCTGATTCAGATTCAAGCAGTGGTGGCGAAACTTTTACAGGAGAGTATTCGGAAGGATTGCCCATTTATAAAGAAATCAAAGGAAGAGGCCCTTTTTCTGATGAGATTGCGCAATATGCCGTAGGTGCAGCAGTGAAGTATAAATTATTACCAAGTGTGATCCTTTCGCAATACGGGTATGAATCAGCGTTTGGTACGTCGGCGTCTGCAAGAAATGATCTCAATTATTTTGGGATT…
GCF_031929605.1	NZ_JARQBE0100000171.13418.AOI_01	95.2;Enterocin_SE-K4	LILGIVLLSVSTLGITVDAATYYGNGVYCNTQKCWVDWSRAHSEIVDRGVKAYVNGFTKVLGGVGGR	TTGATTTTAGGAATTGTTTTATTGAGTGTATCTACTTTAGGAATTACAGTAGATGCTGCAACTTATTATGGAAATGGTGTTTATTGTAATACTCAAAAATGTTGGGTAGATTGGAGTAGAGCTCACTCTGAGATTGTTGATAGAGGAGTAAAAGCTTACGTTAATGGTTTTACGAAAGTGCTAGGTGGAGTCGGTGGAAGA
GCF_031929605.1	NZ_JARQBE0100000171.13418.AOI_02	63.3;Enterolysin_A	MENQNESLIKQYVKRRAKRRLFLWLFGTSAGLITILITVFVTLFLILAAGSIDNSDSDSSSGGETFTGEYSEGLPIYKEIKGRGPFSDEIAQYAVGAAVKYKLLPSVILSQYGYESAFGTSASARNDLNYFGITWFDGCLFPKGTARGIGGIEGGWYMKFPNSKAAFSYYGFMVATQSNFNACVGNKSPGASLLILGRGGYAAAGITEDSPYYTGCMSIITSNKLTEYDEFAIKHWGEGGNNNGTITGEWTNPFPGSSLDKSSFSGGQLFGTNPGGEFRPNGFHDGLDFGSVDHQGSEIHAVHGGKVVYVGNPGISGLGACVIVINYDGLNMVYQEFANSTGNSRVKVGDQVKVGQVIGIRDTAHLHLGFTRMDWRQAQGHAFTDDGTWIDPLPFLNSS…	ATGGAAAACCAAAATGAAAGTTTAATCAAGCAGTATGTTAAGCGTCGTGCAAAGCGACGCTTATTTTTGTGGTTGTTTGGTACTTCTGCAGGTTTGATTACCATTTTGATCACTGTATTCGTGACCCTATTTTTAATACTTGCGGCTGGTTCGATTGATAATTCTGATTCAGATTCAAGCAGTGGTGGCGAAACTTTTACAGGAGAGTATTCGGAAGGATTGCCCATTTATAAAGAAATCAAAGGAAGAGGCCCTTTTTCTGATGAGATTGCGCAATATGCCGTAGGTGCAGCAGTGAAGTATAAATTATTACCAAGTGTGATCCTTTCGCAATACGGGTATGAATCAGCGTTTGGTACGTCGGCGTCTGCAAGAAATGATCTCAATTATTTTGGGATT…
GCF_031929745.1	NZ_JARQBH0100000231.13498.AOI_01	63.3;Enterolysin_A	MENKNESLIKQYVKRRAKRRLFLWLFGTSAGLITILITVFVTFFLILAAGSIDNSDSDSSSGGEAFTGEYSEGLPIYKEIKGRGPFSDEIAQYAVGAAVKYKLLPSVILSQYGYESAFGTSASARNDLNYFGTTWFDGCLFPKGTARGIGGIEGGWYMKFPNSKAAFSYYGFMVATQSNFNACVGNKSPGASLLILGRGGYAAAGITEDSPYYTGCMSIITSNKLTEYDEFAIKHWGEGNNNNGTITGEWTNPFPGSSLDKSSFSGGQLFGTNPGGEFRPNGFHDGLDFGSVDHPGSEIHAVHGGKVVYVGNPGISGLGACVIVINYDGLNMVYQEFANSTGNSRVKVGDQVKVGQVIGIRDTAHLHLGFTRMDWRQAQGHAFTDDGTWIDPLPFLNSS…	ATGGAAAACAAAAATGAAAGTTTAATCAAGCAGTATGTTAAGCGTCGTGCAAAGCGACGCTTATTTTTGTGGTTGTTTGGTACTTCTGCAGGTTTGATTACTATTTTGATTACTGTGTTCGTGACCTTTTTTCTAATACTTGCGGCGGGTTCGATTGATAATTCTGATTCAGATTCAAGTAGTGGTGGCGAAGCTTTTACAGGAGAATATTCGGAAGGATTACCCATTTATAAAGAAATCAAAGGAAGAGGCCCTTTTTCTGATGAGATTGCGCAATATGCTGTAGGTGCAGCAGTGAAATATAAATTATTACCAAGTGTGATTCTTTCGCAATACGGTTATGAATCAGCGTTTGGTACGTCGGCGTCCGCAAGAAATGATCTCAACTATTTTGGGACT…
GCF_031929745.1	NZ_JARQBH0100000361.13478.AOI_01	91.2;Enterocin_P	MRKKLFSLALIGIFGLVVTNFGTKVDAATRSYGNGVYCNNSKCWVNWGEAKENIAGIVISGWASGLAGMGH	ATGAGAAAAAAATTATTTAGTTTAGCTCTTATTGGAATATTTGGGTTAGTTGTGACAAATTTTGGTACAAAAGTTGATGCAGCTACGCGTTCATATGGTAATGGTGTTTATTGTAATAATAGTAAATGCTGGGTTAACTGGGGAGAAGCTAAAGAGAATATTGCAGGAATCGTTATTAGTGGCTGGGCTTCTGGTTTGGCAGGTATGGGACAT
GCF_031929745.1	NZ_JARQBH0100000411.13508.AOI_01	51.2;Carnocin_CP52	MDKQQELLNLLSKAYNDPKINEYEGLKDKLFECASRLTNNEVNIGEVCYKLSTIISKYLVTHNFKITESIIELQNFVTKESQKYRGWASIGIWS	ATGGACAAGCAACAAGAATTACTGAATTTACTTAGTAAAGCGTATAATGATCCTAAAATAAATGAATACGAAGGGTTAAAAGATAAGTTATTTGAATGTGCAAGCAGATTAACAAATAACGAAGTAAATATCGGTGAAGTTTGTTATAAATTAAGTACAATTATCAGTAAATATCTAGTAACACATAATTTTAAAATAACTGAATCAATTATTGAATTGCAAAATTTTGTGACTAAAGAGAGCCAAAAATATAGGGGATGGGCGTCTATCGGTATTTGGAGT
GCF_031929745.1	NZ_JARQBH0100000411.13508.AOI_01	16.2;Bacteriocin_31	MNFLGKDNMKKKFVSIFMILGIVLLSVSTLGITVDAATYYGNGVYCNKQKCWVDWNKASKEIGKIIVNGWVQHGPWAPR	ATGAATTTTTTAGGGAAGGACAATATGAAGAAAAAATTTGTTAGTATTTTTATGATTTTAGGAATTGTTTTATTGAGTGTATCTACTTTAGGAATTACAGTAGATGCTGCAACTTATTATGGAAATGGTGTATATTGTAATAAACAAAAATGTTGGGTAGATTGGAATAAAGCTTCAAAAGAAATAGGAAAAATTATTGTTAATGGTTGGGTGCAACATGGACCTTGGGCTCCTAGA
GCF_031929645.1	NZ_JARQBK0100000151.13458.AOI_01	63.3;Enterolysin_A	MENQNESLIKQYVKRRAKRRLFLWLFGTSAGLMTILITVYVTLFLILAAGSIDNSDSDSSSGGEVFGEAFTGEYSEGLPIYKEIKGRGPFSDEIAQYAVGAAVKYKLLPSVILSQYGYESAFGTSASARNDLNYFGITWFDGCLFPKGTARGIGGIEGGWYMKFPNSKAAFSYYGFMVATQSNFNASVGNKSPGASLLILGRGGYAAAGITEDSPYYTGCMSIITSNKLTEYDEFAIKHWGEGGNDNGTITGEWTNPFPGSSLDKSSFSGGQLFGTNPGGEFRPNGFHDGLDFGSVDHPGSEIHAVHGGKVVYVGNPGISGLGACVIVINYDGLNMVYQEFANSTGNSRVKVGDQVKVGQVIGIRDTAHLHLGFTRMDWRQAQGHAFTDDGTWIDPLPF…	ATGGAAAACCAAAATGAAAGTTTAATCAAGCAGTATGTTAAGCGTCGTGCAAAGCGACGCTTATTTTTGTGGTTGTTTGGTACTTCTGCAGGTTTGATGACTATTTTGATCACTGTGTACGTGACCCTTTTTCTAATACTGGCGGCGGGTTCGATTGATAATTCTGATTCAGATTCAAGCAGTGGTGGCGAAGTTTTTGGCGAAGCTTTTACAGGAGAATATTCGGAAGGATTACCCATTTATAAAGAAATCAAAGGAAGAGGCCCTTTTTCTGATGAGATTGCGCAATATGCTGTAGGTGCAGCAGTGAAATATAAATTATTACCAAGTGTGATCCTTTCGCAATACGGTTACGAATCAGCGTTTGGTACGTCGGCGTCCGCAAGAAATGATCTCAAT…
GCF_031929825.1	NZ_JARQBL0100000151.13551.AOI_01	63.3;Enterolysin_A	MENQNESLIKQYVKRRAKRRLFLWLFGTSAGLMTILITVYVTLFLILAAGSIDNSDSDSSSGGEVFGEAFTGEYSEGLPIYKEIKGRGPFSDEIAQYAVGAAVKYKLLPSVILSQYGYESAFGTSASARNDLNYFGITWFDGCLFPKGTARGIGGIEGGWYMKFPNSKAAFSYYGFMVATQSNFNASVGNKSPGASLLILGRGGYAAAGITEDSPYYTGCMSIITSNKLTEYDEFAIKHWGEGGNDNGTITGEWTNPFPGSSLDKSSFSGGQLFGTNPGGEFRPNGFHDGLDFGSVDHPGSEIHAVHGGKVVYVGNPGISGLGACVIVINYDGLNMVYQEFANSTGNSRVKVGDQVKVGQVIGIRDTAHLHLGFTRMDWRQAQGHAFTDDGTWIDPLPF…	ATGGAAAACCAAAATGAAAGTTTAATCAAGCAGTATGTTAAGCGTCGTGCAAAGCGACGCTTATTTTTGTGGTTGTTTGGTACTTCTGCAGGTTTGATGACTATTTTGATCACTGTGTACGTGACCCTTTTTCTAATACTGGCGGCGGGTTCGATTGATAATTCTGATTCAGATTCAAGCAGTGGTGGCGAAGTTTTTGGCGAAGCTTTTACAGGAGAATATTCGGAAGGATTACCCATTTATAAAGAAATCAAAGGAAGAGGCCCTTTTTCTGATGAGATTGCGCAATATGCTGTAGGTGCAGCAGTGAAATATAAATTATTACCAAGTGTGATCCTTTCGCAATACGGTTACGAATCAGCGTTTGGTACGTCGGCGTCCGCAAGAAATGATCTCAAT…
GCF_029624215.1	NZ_JARRYI0100000121.12313.AOI_01	225.2;UviB	MEKLLGSLLSNPEQISFAVLFVGLFIWVMQQNNAREKRYQGTIDKLTDALGDVEDIKSTVEKIHEKLQ	ATGGAAAAATTACTAGGGTCGTTACTCTCAAACCCTGAACAGATCAGCTTTGCTGTTTTGTTTGTGGGATTGTTTATTTGGGTGATGCAGCAGAATAACGCACGAGAAAAAAGGTATCAAGGGACGATCGACAAACTGACGGATGCTCTGGGCGATGTGGAAGATATCAAAAGTACCGTGGAGAAGATCCACGAAAAATTACAG
GCF_029624215.1	NZ_JARRYI0100000171.12322.AOI_01	63.3;Enterolysin_A	MENQDESLIKQYVKRRAKRRLFLWLFGTSAGLITILITVFVTLFLILAAGSIDNSDSDSSSGGEAFTGEYSEGLPIYKEIKGRGPFSDEIAQYAVGAAVKYKLLPSVILSQYGYESAFGTSASARNDLNYFGITWFDGCLFPKGTARGIGGIEGGWYMKFPNSKAAFSYYGFMVATQSNFNASVGNKSPGASLLILGRGGYAAAGITEDSPYYTGCMSIITSNKLTEYDEFAIKHWGEGGNDNGTITGEWTNPFPGSSLDKSSFSGGQLFGTNPGGEFRPNGFHDGLDFGSVDHPGSEIHAVHGGKVVYVGNPGISGLGACVIVINYDGLNMVYQEFANSTGNSRVKVGDQVKVGQVIGIRDTAHLHLGFTRMDWRQAQGHAFTDDGTWIDPLPFLNSS…	ATGGAAAATCAAGATGAAAGTTTAATCAAGCAGTATGTTAAGCGTCGCGCAAAGCGGCGCTTATTTTTGTGGTTGTTTGGTACTTCTGCAGGTTTGATTACTATTTTGATCACTGTGTTTGTGACCCTATTTCTAATACTTGCGGCGGGTTCGATTGATAATTCGGATTCAGATTCAAGCAGTGGTGGCGAAGCTTTTACAGGAGAATATTCGGAAGGCTTACCGATTTATAAAGAAATCAAAGGAAGAGGCCCTTTTTCTGATGAGATTGCGCAATATGCCGTAGGTGCAGCAGTGAAATATAAATTATTACCAAGTGTGATTCTTTCGCAATACGGTTATGAGTCAGCGTTTGGTACGTCGGCGTCCGCAAGAAATGATCTCAACTATTTTGGGATT…
GCF_029624545.1	NZ_JARRYJ0100000111.12817.AOI_01	225.2;UviB	MEKLLGSLLSNPEQISFAVLFVGLFIWVMQQNNAREKRYQGTIDKLTDALGDVEDIKSTVEKIHEKLQ	ATGGAAAAATTACTAGGGTCGTTACTCTCAAACCCTGAACAGATCAGCTTTGCTGTTTTGTTTGTGGGATTGTTTATTTGGGTGATGCAGCAGAATAACGCACGAGAAAAAAGGTATCAAGGGACGATCGACAAACTGACGGATGCTCTGGGCGATGTGGAAGATATCAAAAGTACCGTGGAGAAGATCCACGAAAAATTACAG
GCF_029624545.1	NZ_JARRYJ0100000171.12848.AOI_01	63.3;Enterolysin_A	MENQDESLIKQYVKRRAKRRLFLWLFGTSAGLITILITVFVTLFLILAAGSIDNSDSDSSSGGEAFTGEYSEGLPIYKEIKGRGPFSDEIAQYAVGAAVKYKLLPSVILSQYGYESAFGTSASARNDLNYFGITWFDGCLFPKGTARGIGGIEGGWYMKFPNSKAAFSYYGFMVATQSNFNASVGNKSPGASLLILGRGGYAAAGITEDSPYYTGCMSIITSNKLTEYDEFAIKHWGEGGNDNGTITGEWTNPFPGSSLDKSSFSGGQLFGTNPGGEFRPNGFHDGLDFGSVDHPGSEIHAVHGGKVVYVGNPGISGLGACVIVINYDGLNMVYQEFANSTGNSRVKVGDQVKVGQVIGIRDTAHLHLGFTRMDWRQAQGHAFTDDGTWIDPLPFLNSS…	ATGGAAAATCAAGATGAAAGTTTAATCAAGCAGTATGTTAAGCGTCGCGCAAAGCGGCGCTTATTTTTGTGGTTGTTTGGTACTTCTGCAGGTTTGATTACTATTTTGATCACTGTGTTTGTGACCCTATTTCTAATACTTGCGGCGGGTTCGATTGATAATTCGGATTCAGATTCAAGCAGTGGTGGCGAAGCTTTTACAGGAGAATATTCGGAAGGCTTACCGATTTATAAAGAAATCAAAGGAAGAGGCCCTTTTTCTGATGAGATTGCGCAATATGCCGTAGGTGCAGCAGTGAAATATAAATTATTACCAAGTGTGATTCTTTCGCAATACGGTTATGAGTCAGCGTTTGGTACGTCGGCGTCCGCAAGAAATGATCTCAACTATTTTGGGATT…
GCF_029624485.1	NZ_JARRYP0100000401.12712.AOI_01	63.3;Enterolysin_A	MENQNESLIKQYVKRRAKRRLFLWLFGTSAGLITILITVFVTLFLILAAGSIDNSDSDSSSGGEAFTGEYSEGLPIYKEIKGRGPFSDEIAQCAVGAAVKYKLLPSVILSQYGYESAFGTSASARNDLNYFGITWFDGCLFPKGTARGIGGIEGGWYMKFPNSKAAFSYYGFMVATQSNFNACVGNKSPGASLLILGRGGYAAAGITEDSPYYTGCMSIITSNKLTEYDEFAIKHWGEGGNNNGTITGEWTNPFPGSSLDKSSFSGGQLFGTNPGGEFRPNGFHDGLDFGSVDHPGSEIHAVHGGKVVYVGNPGISGLGACVIVINYDGLNMVYQEFANSTGNSRVKVGDQVKVGQVIGIRDTAHLHLGFTRMDWRQAQGHAFTDDGTWIDPLPFLNSS…	ATGGAAAACCAAAATGAAAGCTTAATCAAGCAGTATGTTAAGCGTCGCGCAAAGCGACGCTTATTTTTGTGGTTGTTTGGTACTTCTGCAGGTTTGATTACTATTTTGATCACTGTGTTTGTGACCCTATTTCTAATACTTGCGGCAGGTTCGATTGATAATTCGGATTCAGATTCAAGCAGTGGTGGCGAAGCTTTTACAGGAGAATATTCGGAAGGCTTACCGATTTATAAAGAAATCAAAGGAAGAGGCCCTTTTTCTGATGAGATTGCGCAATGTGCTGTAGGTGCAGCAGTGAAATATAAATTATTACCAAGTGTGATCCTTTCGCAATACGGTTACGAATCAGCGTTTGGTACGTCGGCGTCCGCAAGAAATGATCTCAACTATTTTGGGATT…
GCF_029624415.1	NZ_JARRYT0100000131.12561.AOI_01	63.3;Enterolysin_A	MENQNESLIKQYVKRRAKRRLFLWLFGTSAGLMTILITVFVTLFLILAAGSIDNSDSSSGGEAFTGEYSEGLPIYKEIKGRGQFSDEIAQYAVGAAVKYKLLPSVILSQYGYESAFGTSASARNDLNYFGITWFDGCLFPKGTARGIGGIEGGWYMKFPNSKAAFSYYGFMVATQSNFNACVGNKSPGASLLILGRGGYAAAGITEDSAYYKNCMSIINKNKLTEYDEFAIKHWGEGGNNNGTITGEWTNPFPGSSLDKNSFSGGQLFGTNPGGEFRPNGFHDGLDFGSVDHPGSEIHAVHGGKVVYVGNPGISGLGACVIVINYDGLNMVYQEFANSTGNSRVKVGDQVKVGQVIGIRDTAHLHLGFTRMDWRQAQGHAFIDDGTWIDPLPFLNSSKK	ATGGAAAACCAAAATGAAAGTTTAATCAAGCAGTATGTTAAGCGTCGTGCAAAGCGACGCTTATTTTTGTGGTTGTTTGGTACTTCTGCAGGTTTGATGACTATTTTGATCACTGTGTTTGTGACCCTATTTCTAATACTTGCCGCGGGTTCTATTGATAATTCTGATTCAAGTAGTGGTGGCGAAGCTTTTACAGGAGAATATTCGGAAGGATTACCCATTTATAAAGAAATCAAAGGAAGAGGACAATTTTCAGATGAAATCGCACAATACGCTGTAGGTGCAGCCGTGAAATATAAATTATTACCAAGTGTAATTCTTTCGCAATACGGTTATGAATCAGCGTTTGGTACATCGGCATCCGCAAGAAATGATCTCAATTATTTTGGGATTACGTGG…
GCF_029624585.1	NZ_JARRYV0100000381.12942.AOI_01	63.3;Enterolysin_A	MENQNESLIKQYVKRRAKRRLFLWLFGTSAGLITILITVFVTLFLILAAGSIDNSDSDSSSGGEAFTGEYSEGLPIYKEIKGRGPFSDEIAQCAVGAAVKYKLLPSVILSQYGYESAFGTSASARNDLNYFGITWFDGCLFPKGTARGIGGIEGGWYMKFPNSKAAFSYYGFMVATQSNFNACVGNKSPGASLLILGRGGYAAAGITEDSPYYTGCMSIITSNKLTEYDEFAIKHWGEGGNNNGTITGEWTNPFPGSSLDKSSFSGGQLFGTNPGGEFRPNGFHDGLDFGSVDHPGSEIHAVHGGKVVYVGNPGISGLGACVIVINYDGLNMVYQEFANSTGNSRVKVGDQVKVGQVIGIRDTAHLHLGFTRMDWRQAQGHAFTDDGTWIDPLPFLNSS…	ATGGAAAACCAAAATGAAAGCTTAATCAAGCAGTATGTTAAGCGTCGCGCAAAGCGACGCTTATTTTTGTGGTTGTTTGGTACTTCTGCAGGTTTGATTACTATTTTGATCACTGTGTTTGTGACCCTATTTCTAATACTTGCGGCAGGTTCGATTGATAATTCGGATTCAGATTCAAGCAGTGGTGGCGAAGCTTTTACAGGAGAATATTCGGAAGGCTTACCGATTTATAAAGAAATCAAAGGAAGAGGCCCTTTTTCTGATGAGATTGCGCAATGTGCTGTAGGTGCAGCAGTGAAATATAAATTATTACCAAGTGTGATCCTTTCGCAATACGGTTACGAATCAGCGTTTGGTACGTCGGCGTCCGCAAGAAATGATCTCAACTATTTTGGGATT…
GCF_029624325.1	NZ_JARRZA0100000201.12487.AOI_01	63.3;Enterolysin_A	MENQNESLIKQYVKRRAKRRLFLWLFGTSAGLMTILITVFVTLFLILAAGSIDNSDSDSSSGGEAFTGEYSEGLPIYKEIKGRGPFSDEIAQYAVGAAVKYKLLPSVILSQYGYESAFGTSASARNDLNYFGITWFDGCLFPKGTARGIGGIEGGWYMKFPNSKAALSYYGFMVATQSNFNACVGNKSPGASLLILGRGGYAAAGITEDSPYYTGCMSIITSNKLTEYDEFAMKHWGEGGNDNGTITGEWTNPFPGSSLDKSSFSGGQLFGTNPGGEFRPNGFHDGLDFGSVDHPGSEIHAVHGGKVVYVGNPGISGLGACVIVINYDGLNMVYQEFANSTGNSRVKVGDQVKVGQVIGIRDTAHLHLGFTRMDWRQAQGHAFTDDGTWIDPLPFLNSS…	ATGGAAAACCAAAATGAAAGTTTAATCAAGCAGTATGTTAAGCGTCGTGCAAAGCGACGCTTATTTTTGTGGTTGTTTGGTACTTCTGCAGGTTTGATGACTATTTTGATCACTGTGTTCGTGACCCTTTTTCTAATACTTGCGGCGGGTTCGATTGATAATTCGGATTCAGATTCAAGCAGTGGTGGCGAAGCTTTTACAGGAGAATATTCGGAAGGATTACCCATTTATAAAGAAATCAAAGGAAGAGGCCCTTTTTCTGATGAGATTGCGCAATATGCTGTAGGTGCAGCAGTGAAATATAAATTATTACCAAGTGTGATCCTTTCGCAATACGGTTACGAATCAGCGTTTGGTACGTCGGCGTCCGCAAGAAATGATCTCAACTATTTTGGGATT…
GCF_029624325.1	NZ_JARRZA0100000201.12487.AOI_02	95.2;Enterocin_SE-K4	LILGIVLLSVSTLGITVDAATYYGNGVYCNTQKCWVDWSRARSEIVDRGVKAYVNGFTKVLGGVGGR	TTGATTTTAGGAATTGTTTTATTGAGTGTATCTACTTTAGGAATTACAGTAGATGCTGCAACTTATTATGGAAATGGTGTTTATTGTAATACTCAAAAATGTTGGGTAGATTGGAGTAGAGCTCGCTCTGAGATTGTTGATAGAGGAGTAAAAGCTTACGTTAATGGTTTTACGAAAGTGCTAGGTGGAGTCGGTGGAAGA
GCF_029624375.1	NZ_JARRZB0100000201.12546.AOI_01	95.2;Enterocin_SE-K4	LILGIVLLSVSTLGITVDAATYYGNGVYCNTQKCWVDWSRARSEIVDRGVKAYVNGFTKVLGGVGGR	TTGATTTTAGGAATTGTTTTATTGAGTGTATCTACTTTAGGAATTACAGTAGATGCTGCAACTTATTATGGAAATGGTGTTTATTGTAATACTCAAAAATGTTGGGTAGATTGGAGTAGAGCTCGCTCTGAGATTGTTGATAGAGGAGTAAAAGCTTACGTTAATGGTTTTACGAAAGTGCTAGGTGGAGTCGGTGGAAGA
GCF_029624375.1	NZ_JARRZB0100000201.12546.AOI_02	63.3;Enterolysin_A	MENQNESLIKQYVKRRAKRRLFLWLFGTSAGLMTILITVFVTLFLILAAGSIDNSDSDSSSGGEAFTGEYSEGLPIYKEIKGRGPFSDEIAQYAVGAAVKYKLLPSVILSQYGYESAFGTSASARNDLNYFGITWFDGCLFPKGTARGIGGIEGGWYMKFPNSKAALSYYGFMVATQSNFNACVGNKSPGASLLILGRGGYAAAGITEDSPYYTGCMSIITSNKLTEYDEFAMKHWGEGGNDNGTITGEWTNPFPGSSLDKSSFSGGQLFGTNPGGEFRPNGFHDGLDFGSVDHPGSEIHAVHGGKVVYVGNPGISGLGACVIVINYDGLNMVYQEFANSTGNSRVKVGDQVKVGQVIGIRDTAHLHLGFTRMDWRQAQGHAFTDDGTWIDPLPFLNSS…	ATGGAAAACCAAAATGAAAGTTTAATCAAGCAGTATGTTAAGCGTCGTGCAAAGCGACGCTTATTTTTGTGGTTGTTTGGTACTTCTGCAGGTTTGATGACTATTTTGATCACTGTGTTCGTGACCCTTTTTCTAATACTTGCGGCGGGTTCGATTGATAATTCGGATTCAGATTCAAGCAGTGGTGGCGAAGCTTTTACAGGAGAATATTCGGAAGGATTACCCATTTATAAAGAAATCAAAGGAAGAGGCCCTTTTTCTGATGAGATTGCGCAATATGCTGTAGGTGCAGCAGTGAAATATAAATTATTACCAAGTGTGATCCTTTCGCAATACGGTTACGAATCAGCGTTTGGTACGTCGGCGTCCGCAAGAAATGATCTCAACTATTTTGGGATT…
GCF_030237875.1	NZ_JASGSE0100000181.13022.AOI_01	63.3;Enterolysin_A	MENQNESLIKQYVKRRAKRRLFLWLFGTSAGLITILITVFVTLFLILAAGSIDNSDSDSSSGGETFTGEYSEGLPIYKEIKGRGPFSDEIAQYAVGAAVKYKLLPSVILSQYGYESAFGTSASARNDLNYFGITWFDGCLFPKGTARGIGGIEGGWYMKFPNSKAAFSYYGFMVATQSNFNACVGNKSPGASLLILGRGGYAAAGITEDSPYYTGCMSIITSNKLTEYDEFAIKHWGEGGNNNGTITGEWTNPFPGSSLDKSSFSGGQLFGTNPGGEFRPNGFHDGLDFGSVDHPGSEIHAVHGGKVVYVGNPGISGLGACVIVINYDGLNMVYQEFANSTGNSRVKVGDQVKVGQVIGIRDTAHLHLGFTRMDWRQAQGHAFTGNGTWIDPLPFLNSS…	ATGGAAAACCAAAATGAAAGTTTAATCAAGCAGTATGTTAAGCGTCGTGCAAAGCGACGCTTATTTTTGTGGTTGTTTGGTACTTCTGCAGGTTTGATTACCATTTTGATCACTGTATTCGTGACCCTATTTTTAATACTTGCGGCTGGTTCGATTGATAATTCTGATTCAGATTCAAGCAGTGGTGGCGAAACTTTTACAGGAGAGTATTCGGAAGGATTGCCCATTTATAAAGAAATCAAAGGAAGAGGCCCTTTTTCTGATGAGATTGCGCAATATGCCGTAGGTGCAGCAGTGAAGTATAAATTATTACCAAGTGTGATCCTTTCGCAATACGGGTATGAATCAGCGTTTGGTACGTCGGCGTCTGCAAGAAATGATCTCAATTATTTTGGGATT…
GCF_030237875.1	NZ_JASGSE0100000291.13034.AOI_01	16.2;Bacteriocin_31	VKKKFVSIFMILGIVLLSVSTLGITVDAATYYGNGVYCNKQKCWVDWNKASKEIGKIIVNGWVQHGPWAPR	GTGAAGAAAAAATTTGTTAGTATTTTTATGATTTTAGGAATTGTTTTATTGAGTGTATCTACTTTAGGAATTACAGTAGATGCTGCAACTTATTATGGAAATGGTGTATATTGTAATAAACAAAAATGTTGGGTAGATTGGAATAAAGCTTCAAAAGAAATAGGAAAAATTATTGTTAATGGTTGGGTGCAACATGGACCTTGGGCTCCTAGA
GCF_030237875.1	NZ_JASGSE0100000291.13034.AOI_01	51.2;Carnocin_CP52	MDKQQELLNLLSKAYNDPKINEYEGLKDKLFECASRLTNNEVNIGEVCYKLSTIISKYLVTHNFKITESIIELQNFVTKESQKYRGWASIGIWS	ATGGACAAGCAACAAGAATTACTGAATTTACTTAGTAAAGCGTATAATGATCCTAAAATAAATGAATACGAAGGGTTAAAAGATAAGTTATTTGAATGTGCAAGCAGATTAACAAATAACGAAGTAAATATCGGTGAAGTTTGTTATAAATTAAGTACAATTATCAGTAAATATCTAGTAACACATAATTTTAAAATAACTGAATCAATTATTGAATTGCAAAATTTTGTGACTAAAGAGAGCCAAAAATATAGGGGATGGGCGTCTATCGGTATTTGGAGT
GCF_030815165.1	NZ_JAUSWI0100000221.13297.AOI_01	63.3;Enterolysin_A	METQNESLIKQYVKRRAKRRLFLWLFGTSAGLMTILITVFVTLFLILAAGSIDNSDSDSSSGGEAFTGEYSEGLPIYKEIKGRGPFSDEIAQYAVGAAVKYKLLPSVILSQYGYESAFGTSLSAKNDLNFFGITWFDGCLFPKGTARGIGGIEGGWYMKFPNSKAAFSYYGFMVATQSNFNASVGNKSPGVSLLILGRGGYAAAGITEDSPYYTGCMSIITSNKLTEYDELAIKHWGEGGNNNGTITGEWMNPFPGSSLDKSSFSGGQLFGTNPGGEFRPNGFHDGLDFGSVDHPGSEIHAVHGGKVVYVGNPGISGLGACVIVINYDGLNMVYQEFANSTGNSRVKVGDQVKVGQVIGIRDTAHLHLGFTRMDWRQAQGHAFTDDGTWIDPLPFLNSS…	ATGGAAACCCAAAATGAAAGTTTAATCAAGCAGTATGTTAAGCGTCGTGCAAAGCGGCGCTTATTTTTGTGGTTGTTTGGTACTTCTGCAGGTTTGATGACTATTTTGATCACTGTGTTTGTGACCCTATTTCTAATACTTGCCGCGGGATCGATTGATAATTCGGATTCAGATTCAAGCAGTGGTGGCGAAGCTTTTACAGGAGAATATTCGGAAGGATTACCCATTTATAAAGAAATCAAAGGAAGAGGCCCTTTTTCTGATGAAATTGCGCAATATGCTGTAGGTGCAGCAGTGAAATACAAATTATTGCCAAGTGTGATCCTATCGCAATACGGGTATGAATCGGCATTTGGAACGTCTCTATCTGCTAAAAACGACTTGAATTTTTTCGGAATT…
GCF_030815165.1	NZ_JAUSWI0100000351.13267.AOI_01	91.2;Enterocin_P	VTNFGTKVDAATRSYDNGIYCNNSKCWVNWGEAKENIAGIVISGWASGLAGMGH	GTGACGAATTTTGGTACAAAAGTTGATGCAGCTACGCGTTCATATGATAATGGTATTTATTGTAATAATAGTAAGTGCTGGGTTAACTGGGGAGAAGCTAAAGAAAATATTGCAGGAATTGTTATTAGTGGCTGGGCTTCTGGCTTGGCAGGTATGGGACAT
GCF_030769805.1	NZ_JAVBZS0100000361.13161.AOI_01	95.2;Enterocin_SE-K4	LILGIVLLSVSTLGITVDAATYYGNGVYCNTQKCWVDWSRARSEIVDRGVKAYVNGFTKVLGGVGGR	TTGATTTTAGGAATTGTTTTATTGAGTGTATCTACTTTAGGAATTACAGTAGATGCTGCAACTTATTATGGAAATGGTGTTTATTGTAATACTCAAAAATGTTGGGTAGATTGGAGTAGAGCTCGCTCTGAGATTGTTGATAGAGGAGTAAAAGCTTACGTTAATGGTTTTACGAAAGTGCTAGGTGGAGTCGGTGGAAGA
GCF_030769805.1	NZ_JAVBZS0100000361.13161.AOI_02	63.3;Enterolysin_A	MENQDESLIKQYVKRRAKRRLFLWLFGTSAGLITILITVFVTLFLILAAGSIDNSDSDSSSGGETFTGEYSEGLPIYKEIKGRGPFSDEIAQYAVGAAVKYKLLPSVILSQYGYESAFGTSASARNDLNYFGITWFDGCLFPKGTARGIGGIEGGWYMKFPNSKAAFSYYGFMVATQSNFNACVGNKSPGASLLILGRGGYAAAGITGDSPYYTGCMSIITSNKLTEYDEFAIKHWGEGGNNNGTITGEWTNPFPGSSLDKSSFSGGQLFGTNPGGEFRPNGFHDGLDFGSVDHPGSEIHAVHVGKVVYVGNPGISGLGACVIVINYDGLNMVYQEFANSTGNSCVKVGDQVKVGQVIGIRDTAHLHLGFTRMDWRQAQGHAFTGDGTWIDPLPFLNSS…	ATGGAAAATCAAGATGAAAGTTTAATCAAGCAGTATGTTAAGCGTCGCGCAAAGCGGCGCTTATTTTTGTGGTTGTTTGGTACTTCTGCAGGTTTGATTACCATTTTGATCACTGTATTCGTGACCCTATTTTTAATACTTGCGGCTGGTTCGATTGATAATTCGGATTCAGATTCAAGCAGTGGTGGCGAAACTTTTACAGGAGAGTATTCGGAAGGATTGCCCATTTATAAAGAAATCAAAGGAAGAGGCCCTTTTTCTGATGAGATTGCGCAATATGCCGTAGGTGCAGCAGTGAAATATAAATTATTACCAAGTGTAATCCTTTCTCAATACGGTTACGAATCAGCGTTTGGTACGTCGGCGTCCGCAAGAAATGATCTCAACTATTTTGGAATT…
GCF_030769805.1	NZ_JAVBZS0100000581.13044.AOI_01	91.2;Enterocin_P	VTNFGTKVDAVTRSYDNGIYCNNSKCWVNWGEAKENIAGIVISGWASGLAGMGH	GTGACGAATTTTGGTACAAAAGTTGATGCAGTTACGCGTTCATATGATAATGGTATTTATTGTAATAATAGTAAGTGCTGGGTTAACTGGGGAGAAGCTAAAGAAAATATTGCAGGAATTGTTATTAGTGGCTGGGCTTCTGGCTTGGCAGGTATGGGACAT
GCF_030769805.1	NZ_JAVBZS0100000771.13045.AOI_01	87.2;Enterocin_L50b	MGAIAKLVTKFGWPLIKKFYKQIMQFIGQGWTIDQIEKWLKRH	ATGGGAGCAATCGCAAAACTAGTGACAAAGTTTGGGTGGCCACTAATCAAAAAATTCTACAAACAAATCATGCAATTTATTGGACAAGGATGGACAATAGATCAAATTGAAAAATGGCTAAAAAGACAT
GCF_030769805.1	NZ_JAVBZS0100000771.13045.AOI_01	86.2;Enterocin_L50a	MNKKNDWRSYIMGAIAKLVAKFGWPIVKKYYKQIMQFIGEGWAINKIIEWIKKHI	ATGAACAAAAAAAATGATTGGAGGAGTTATATTATGGGAGCAATCGCAAAATTAGTAGCAAAGTTTGGGTGGCCTATTGTTAAAAAATATTACAAACAAATTATGCAGTTTATTGGAGAAGGATGGGCAATTAACAAAATCATTGAGTGGATTAAAAAACATATT
GCF_030769865.1	NZ_JAVBZT0100000221.13252.AOI_01	95.2;Enterocin_SE-K4	LILGIVLLSVSTLGITVDAATYYGNGVYCNTQKCWVDWSRARSEIVDRGVKAYVNGFTKVLGGVGGR	TTGATTTTAGGAATTGTTTTATTGAGTGTATCTACTTTAGGAATTACAGTAGATGCTGCAACTTATTATGGAAATGGTGTTTATTGTAATACTCAAAAATGTTGGGTAGATTGGAGTAGAGCTCGCTCTGAGATTGTTGATAGAGGAGTAAAAGCTTACGTTAATGGTTTTACGAAAGTGCTAGGTGGAGTCGGTGGAAGA
GCF_030769865.1	NZ_JAVBZT0100000221.13252.AOI_02	63.3;Enterolysin_A	MENQDESLIKQYVKRRAKRRLFLWLFGTSAGLITILITVFVTLFLILAAGSIDNSDSDSSSGGETFTGEYSEGLPIYKEIKGRGPFSDEIAQYAVGAAVKYKLLPSVILSQYGYESAFGTSASARNDLNYFGITWFDGCLFPKGTARGIGGIEGGWYMKFPNSKAAFSYYGFMVATQSNFNACVGNKSPGASLLILGRGGYAAAGITGDSPYYTGCMSIITSNKLTEYDEFAIKHWGEGGNNNGTITGEWTNPFPGSSLDKSSFSGGQLFGTNPGGEFRPNGFHDGLDFGSVDHPGSEIHAVHVGKVVYVGNPGISGLGACVIVINYDGLNMVYQEFANSTGNSCVKVGDQVKVGQVIGIRDTAHLHLGFTRMDWRQAQGHAFTGDGTWIDPLPFLNSS…	ATGGAAAATCAAGATGAAAGTTTAATCAAGCAGTATGTTAAGCGTCGCGCAAAGCGGCGCTTATTTTTGTGGTTGTTTGGTACTTCTGCAGGTTTGATTACCATTTTGATCACTGTATTCGTGACCCTATTTTTAATACTTGCGGCTGGTTCGATTGATAATTCGGATTCAGATTCAAGCAGTGGTGGCGAAACTTTTACAGGAGAGTATTCGGAAGGATTGCCCATTTATAAAGAAATCAAAGGAAGAGGCCCTTTTTCTGATGAGATTGCGCAATATGCCGTAGGTGCAGCAGTGAAATATAAATTATTACCAAGTGTAATCCTTTCTCAATACGGTTACGAATCAGCGTTTGGTACGTCGGCGTCCGCAAGAAATGATCTCAACTATTTTGGAATT…
GCF_030769865.1	NZ_JAVBZT0100000431.13239.AOI_01	87.2;Enterocin_L50b	MGAIAKLVTKFGWPLIKKFYKQIMQFIGQGWTIDQIEKWLKRH	ATGGGAGCAATCGCAAAACTAGTGACAAAGTTTGGGTGGCCACTAATCAAAAAATTCTACAAACAAATCATGCAATTTATTGGACAAGGATGGACAATAGATCAAATTGAAAAATGGCTAAAAAGACAT
GCF_030769865.1	NZ_JAVBZT0100000431.13239.AOI_01	86.2;Enterocin_L50a	MNKKNDWRSYIMGAIAKLVAKFGWPIVKKYYKQIMQFIGEGWAINKIIEWIKKHI	ATGAACAAAAAAAATGATTGGAGGAGTTATATTATGGGAGCAATCGCAAAATTAGTAGCAAAGTTTGGGTGGCCTATTGTTAAAAAATATTACAAACAAATTATGCAGTTTATTGGAGAAGGATGGGCAATTAACAAAATCATTGAGTGGATTAAAAAACATATT
GCF_031737195.1	NZ_JAVGUY0100000211.13328.AOI_01	225.2;UviB	MEKLLGSLLSNPEQISFAVLFVGLFIWVMQQNNAREKRYQGTIDKLTDALGDVEDIKSTVEKIHEKLQ	ATGGAAAAATTACTAGGGTCGTTACTCTCAAACCCTGAACAGATCAGCTTTGCTGTTTTGTTTGTGGGATTGTTTATTTGGGTGATGCAGCAGAATAACGCACGAGAAAAAAGGTATCAAGGGACGATCGACAAACTGACGGATGCTCTGGGCGATGTGGAAGATATCAAAAGTACCGTGGAGAAGATCCACGAAAAATTACAG
GCF_031737195.1	NZ_JAVGUY0100000231.13351.AOI_01	95.2;Enterocin_SE-K4	LILGIVLLSVSTLGITVDAATYYGNSVYCNTQKCWVDWSRARSEIVDRGVKAYVNGFTKVLGGVGGR	TTGATTTTAGGAATTGTTTTATTGAGTGTATCTACTTTAGGAATTACAGTAGATGCTGCAACTTATTATGGAAATAGTGTTTATTGTAATACTCAAAAATGTTGGGTAGATTGGAGTAGAGCTCGCTCTGAGATTGTTGATAGAGGAGTAAAAGCTTACGTTAATGGTTTTACGAAAGTGCTAGGTGGAGTCGGTGGAAGA
GCF_031737195.1	NZ_JAVGUY0100000231.13351.AOI_02	63.3;Enterolysin_A	MENQDESLIKQYVKRRAKRRLFLWLFGTSAGLITILITVFVTLFLILAAGSIDNSDSDSSSGGETFTGEYSEGLPIYKEIKGRGPFSDEIAQYAVGAAVKYKLLPSVILSQYGYESAFGTSASARNDLNYFGITWFDGCLFPKGTARGIGGIEGGWYMKFPNSKAAFSYYGFMVATQSNFNACVGNKSPGASLLILGRGGYAAAGITEDSPHYTGCMSIITSNKLTEYDEFAIKHWGEGGNNNGTITGEWTNPFPGSSLDKSSFSGGQLFGTNPGGEFRPNGFHDGLDFGSVDHPGSEIHAVHVGKVVYVGNPGISGLGACVIVINYDGLNMVYQEFANSTGNSCVKVGDQVKVGQVIGIRDTAHLHLGFTRMDWRQAQGHAFTGDGTWIDPLPFLNSS…	ATGGAAAATCAAGATGAAAGTTTAATCAAGCAGTATGTTAAGCGTCGCGCAAAGCGGCGCTTATTTTTGTGGTTGTTTGGTACTTCTGCAGGTTTGATTACCATTTTGATCACTGTATTCGTGACCCTATTTTTAATACTTGCGGCTGGTTCGATTGATAATTCGGATTCAGATTCAAGCAGTGGTGGCGAAACTTTTACAGGAGAGTATTCGGAAGGATTGCCCATTTATAAAGAAATCAAAGGAAGAGGCCCTTTTTCTGATGAGATTGCGCAATATGCCGTAGGTGCAGCAGTGAAATATAAATTATTACCAAGTGTAATCCTTTCTCAATACGGTTACGAATCAGCGTTTGGTACGTCGGCGTCCGCAAGAAATGATCTCAACTATTTTGGAATT…
GCF_031737195.1	NZ_JAVGUY0100000421.13332.AOI_01	86.2;Enterocin_L50a	MLKFLLILKNFSSKRKKFNCGKLVFATIHLLCINIYFVKYFFCFCVIYNYYEQKNDWRSYIMGAIAKLVAKFGWPIVKKYYKQIMQFIGEGWAINKIIEWIKKHI	ATGTTAAAATTTTTACTTATTTTAAAAAATTTTTCTTCTAAGAGAAAAAAATTTAATTGTGGAAAGCTAGTATTTGCAACAATACATCTTCTATGCATAAATATATATTTTGTCAAATATTTTTTTTGTTTTTGTGTGATATACAATTATTATGAACAAAAAAATGATTGGAGGAGTTATATTATGGGAGCAATCGCAAAATTAGTAGCAAAGTTTGGGTGGCCTATTGTTAAAAAGTATTACAAACAAATTATGCAGTTTATTGGAGAAGGATGGGCAATTAACAAAATCATTGAGTGGATTAAAAAACATATT
GCF_031737195.1	NZ_JAVGUY0100000421.13332.AOI_01	87.2;Enterocin_L50b	MGAIAKLVTKFGWPLIKKFYKQIMQFIGQGWTIDQIEKWLKRH	ATGGGAGCAATCGCAAAACTAGTGACAAAGTTTGGGTGGCCACTAATCAAAAAATTCTACAAACAAATCATGCAATTTATTGGACAAGGATGGACAATAGATCAAATTGAAAAATGGCTAAAAAGACAT
GCF_032436005.1	NZ_JAVLSA0100000191.13616.AOI_01	63.3;Enterolysin_A	MENQDESLIKQYVKRRAKRRLFLWLFGTSAGLITILITVFVTLFLILAAGSIDNSDSDSSSGGETFTGEYSEGLPIYKEIKGRGPFSDEIAQYAVGAAVKYKLLPSVILSQYGYESAFGTSASARNDLNYFGITWFDGCLFPKGTARGIGGIEGGWYMKFPNSKAAFSYYGFMVATQSNFNACVGNKSPGASLLILGRGGYAAAGITEDSPYYTGCMSIITSNKLTEYDEFAIKHWGEGGNNNGTITGEWTNPFPGSSLDKSSFSGGQLFGTNPGGEFRPNGFHDGLDFGSVDHPGSEIHAVHVGKVVYVGNPGISGLGACVIVINYDGLNMVYQEFANSTGNSCVKVGDQVKVGQVIGIRDTAHLHLGFTRMDWRQAQGHAFTGDGTWIDPLPFLNSS…	ATGGAAAATCAAGATGAAAGTTTAATCAAGCAGTATGTTAAGCGTCGCGCAAAGCGGCGCTTATTTTTGTGGTTGTTTGGTACTTCTGCAGGTTTGATTACCATTTTGATCACTGTATTCGTGACCCTATTTTTAATACTTGCGGCTGGTTCGATTGATAATTCGGATTCAGATTCAAGCAGTGGTGGCGAAACTTTTACAGGAGAGTATTCGGAAGGATTGCCCATTTATAAAGAAATCAAAGGAAGAGGCCCTTTTTCTGATGAGATTGCGCAATATGCCGTAGGTGCAGCAGTGAAATATAAATTATTACCAAGTGTAATCCTTTCTCAATACGGTTACGAATCAGCGTTTGGTACGTCGGCGTCCGCAAGAAATGATCTCAACTATTTTGGAATT…
GCF_032436005.1	NZ_JAVLSA0100000281.13611.AOI_01	86.2;Enterocin_L50a	MNKKNDWRSYIMGAIAKLVAKFGWPIVKKYYKQIMQFIGEGWAINKIIEWIKKHI	ATGAACAAAAAAAATGATTGGAGGAGTTATATTATGGGAGCAATCGCAAAATTAGTAGCAAAGTTTGGGTGGCCTATTGTTAAAAAATATTACAAACAAATTATGCAGTTTATTGGAGAAGGATGGGCAATTAACAAAATCATTGAGTGGATTAAAAAACATATT
GCF_032436005.1	NZ_JAVLSA0100000281.13611.AOI_01	87.2;Enterocin_L50b	MGAIAKLVTKFGWPLIKKFYKQIMQFIGQGWTIDQIEKWLKRH	ATGGGAGCAATCGCAAAACTAGTGACAAAGTTTGGGTGGCCACTAATCAAAAAATTCTACAAACAAATCATGCAATTTATTGGACAAGGATGGACAATAGATCAAATTGAAAAATGGCTAAAAAGACAT
GCF_032436005.1	NZ_JAVLSA0100000471.13593.AOI_01	91.2;Enterocin_P	MRKKLFSLALIGIFGLVVTNFGTKVDAATRSYGNGVYCNNSKCWVNWGEAKENIAGIVISGWASGLAGMGH	ATGAGAAAAAAATTATTTAGTTTAGCTCTTATTGGAATATTTGGGTTAGTTGTGACAAATTTTGGTACAAAAGTTGATGCAGCTACGCGTTCATATGGTAATGGTGTTTATTGTAATAATAGTAAATGCTGGGTTAACTGGGGAGAAGCTAAAGAGAATATTGCAGGAATCGTTATTAGTGGCTGGGCTTCTGGTTTGGCAGGTATGGGACAT
GCF_032842905.1	NZ_JAWJDI0100000361.13648.AOI_01	87.2;Enterocin_L50b	MGAIAKLVTKFGWPLIKKFYKQIMQFIGQGWTIDQIEKWLKRH	ATGGGAGCAATCGCAAAACTAGTGACAAAGTTTGGGTGGCCACTAATCAAAAAATTCTACAAACAAATCATGCAATTTATTGGACAAGGATGGACAATAGATCAAATTGAAAAATGGCTAAAAAGACAT
GCF_032842905.1	NZ_JAWJDI0100000361.13648.AOI_01	86.2;Enterocin_L50a	MNKKNDWRSYIMGAIAKLVAKFGWPIVKKYYKQIMQFIGEGWAINKIIEWIKKHI	ATGAACAAAAAAAATGATTGGAGGAGTTATATTATGGGAGCAATCGCAAAATTAGTAGCAAAGTTTGGGTGGCCTATTGTTAAAAAATATTACAAACAAATTATGCAGTTTATTGGAGAAGGATGGGCAATTAACAAAATCATTGAGTGGATTAAAAAACATATT
GCF_032842905.1	NZ_JAWJDI0100000481.13630.AOI_01	91.2;Enterocin_P	MRKKLFSLTLIGKFGLVVTNFGTKVDAATRSYGNGVYCNNSKCWVNWGEAKENIAGIVISGWASGLAGMGH	ATGAGAAAAAAATTATTTAGTTTAACTCTTATTGGAAAGTTTGGATTAGTTGTGACGAATTTTGGTACAAAAGTTGATGCAGCTACGCGTTCATATGGTAATGGTGTTTATTGTAATAATAGTAAGTGCTGGGTTAACTGGGGAGAAGCTAAAGAAAATATTGCAGGAATTGTTATTAGTGGCTGGGCTTCTGGCTTGGCAGGTATGGGACAT
GCF_033022735.1	NZ_JAWKDV0100000161.13696.AOI_01	95.2;Enterocin_SE-K4	MKKKFVSIFMILGIVLLSVSTLGITVDAATYYGNGVYCNTQKCWVDWSRARSEIVDRGVKVYVNGFTKVLGGVGGR	ATGAAGAAAAAATTTGTTAGTATTTTTATGATTTTAGGAATTGTTTTATTGAGTGTATCTACTTTAGGAATTACAGTAGATGCTGCAACTTATTATGGAAATGGTGTTTATTGTAATACTCAAAAATGTTGGGTAGATTGGAGTAGAGCTCGCTCTGAGATTGTTGATAGAGGAGTAAAAGTTTACGTTAATGGTTTTACGAAAGTGCTAGGTGGAGTCGGTGGAAGA
GCF_033022735.1	NZ_JAWKDV0100000161.13696.AOI_01	91.2;Enterocin_P	MRKKLFSLTLIGKFGLVVTNFGTKVDAATRSYGNGVYCNNSKCWVNWGEAKENIAGIVISGWASGLAGMGH	ATGAGAAAAAAATTATTTAGTTTAACTCTTATTGGAAAGTTTGGATTAGTTGTGACGAATTTTGGTACAAAAGTTGATGCAGCTACGCGTTCATATGGTAATGGTGTTTATTGTAATAATAGTAAGTGCTGGGTTAACTGGGGAGAAGCTAAAGAAAATATTGCAGGAATTGTTATTAGTGGCTGGGCTTCTGGCTTGGCAGGTATGGGACAT
GCF_033022735.1	NZ_JAWKDV0100000161.13696.AOI_02	63.3;Enterolysin_A	MENQNESLIKQYVKRRAKRRLFLWLFGTSAGLITILITVFVTLFLILAAGSIDNSDSDSSSGGETFTGEYSEGLPIYKEIKGRGPFSDEIAQYAVGAAVKYKLLPSVILSQYGYESAFGTSASARNDLNYFGITWFDGCLFPKGTARGIGGIEGGWYMKFPNSKAAFSYYGFMVATQSNFNACVGNKSPGASLLILGRGGYAAAGITEDSPYYTGCMSIITSNKLTEYDEFAIKHWGEGGNNNGTITGEWTNPFPGSSLDKSSFSGGQLFGTNPGGEFRPNGFHDGLDFGSVDHQGSEIHAVHGGKVVYVGNPGISGLGACVIVINYDGLNMVYQEFANSTGNSRVKVGDQVKVGQVIGIRDTAHLHLGFTRMDWRQAQGHAFTDDGTWIDPLPFLNSS…	ATGGAAAACCAAAATGAAAGTTTAATCAAGCAGTATGTTAAGCGTCGTGCAAAGCGACGCTTATTTTTGTGGTTGTTTGGTACTTCTGCAGGTTTGATTACCATTTTGATCACTGTATTCGTGACCCTATTTTTAATACTTGCGGCTGGTTCGATTGATAATTCTGATTCAGATTCAAGCAGTGGTGGCGAAACTTTTACAGGAGAGTATTCGGAAGGATTGCCCATTTATAAAGAAATCAAAGGAAGAGGCCCTTTTTCTGATGAGATTGCGCAATATGCCGTAGGTGCAGCAGTGAAGTATAAATTATTACCAAGTGTGATCCTTTCGCAATACGGGTATGAATCAGCGTTTGGTACGTCGGCGTCTGCAAGAAATGATCTCAATTATTTTGGGATT…
GCF_040092855.1	NZ_JBBNKS0100000581.14087.AOI_01	76.2;EJ97enterocin	VISMKFKFNPTGTIVKKLTQYEIAWFKNKHGYYPWEIPRC	GTGATTTCCATGAAATTTAAATTTAATCCCACAGGAACCATCGTAAAAAAATTAACTCAATATGAAATAGCATGGTTCAAAAATAAACATGGATACTATCCATGGGAAATTCCTAGATGC
GCF_040096765.1	NZ_JBBNPR0100000221.14139.AOI_01	63.3;Enterolysin_A	MENQNESLIKQYVKRRAKRRLFLWLFGTSAGLITILITVFVTLFLILAAGSIDNSDSDSSSGGEDFTGEYSEGLPIYKEIKGRGPFSDEIAQYAVGAAVKYKLLPSVILSQYGYESAFGTSASARNDLNYFGITWFDGCLFPKGTARGIGGIEGGWYMKFPNSKAAFSYYGFMVATQSNFNACVGNKSPGASLLILGRGGYAAAGITEDSPYYTGCMSIITSNKLTEYDEFAMKHWGEGGNDNGTITGEWTNPFPGSSLDKSSFSGGQLFGTNPGGEFRPNGFHDGLDFGSVDHPGSEIHAVHGGKVVYVGNPGISGLGACVIVINYDGLNMVYQEFANSTGNSRVKVGDQVKVGQVIGIRDTAHLHLGFTRMDWRQAQGHAFTDDGTWIDPLPFLNSS…	ATGGAAAACCAAAATGAAAGTTTAATCAAGCAGTATGTTAAGCGTCGTGCAAAGCGACGCTTATTTTTGTGGTTGTTTGGGACTTCTGCAGGTTTGATTACTATTTTGATTACTGTGTTCGTGACCCTTTTTCTAATACTTGCGGCGGGTTCGATTGATAATTCTGATTCAGATTCAAGTAGTGGTGGCGAAGATTTTACAGGAGAATATTCGGAAGGATTACCCATTTATAAAGAAATCAAAGGAAGAGGCCCTTTTTCTGATGAGATTGCGCAATATGCTGTAGGTGCAGCAGTGAAATATAAATTATTACCAAGTGTGATTCTTTCGCAATACGGTTATGAATCAGCGTTTGGTACGTCGGCGTCCGCAAGAAATGATCTCAACTATTTTGGGATT…
GCF_040096765.1	NZ_JBBNPR0100000391.14144.AOI_01	95.2;Enterocin_SE-K4	MKKKLVKGSVICSMIGIGFIVIGTNVEAATYYGNGVYCNKQKCWVNWGQAWSKGVKRWGDNLFGSFSGGRI	ATGAAAAAGAAATTAGTTAAAGGCTCAGTTATTTGTAGCATGATTGGGATTGGTTTTATAGTAATAGGAACAAATGTAGAAGCTGCCACGTATTACGGAAATGGTGTGTATTGTAATAAGCAAAAATGTTGGGTAAATTGGGGACAAGCTTGGTCAAAAGGGGTTAAACGTTGGGGAGATAATTTGTTTGGTAGTTTTAGTGGAGGAAGGATT
GCF_039564095.1	NZ_JBCNWE0100000011.13855.AOI_01	76.2;EJ97enterocin	VISMKFKFNPTGTIVKKLTQYEIAWFKNKHGYYPWEIPRC	GTGATTTCCATGAAATTTAAATTTAATCCAACAGGAACCATCGTAAAAAAATTAACTCAATACGAAATAGCATGGTTCAAAAATAAACATGGATATTATCCATGGGAGATTCCTAGATGC
GCF_039564095.1	NZ_JBCNWE0100000151.13837.AOI_01	91.2;Enterocin_P	MRKKLFSLTLIGKFGLVVTNFGTKVDAATRSYGNGVYCNNSKCWVNWGEAKENIAGIVISGWASGLAGMGH	ATGAGAAAAAAATTATTTAGTTTAACTCTTATTGGAAAGTTTGGATTAGTTGTGACGAATTTTGGTACAAAAGTTGATGCAGCTACGCGTTCATATGGTAATGGTGTTTATTGTAATAATAGTAAGTGCTGGGTTAACTGGGGAGAAGCTAAAGAAAATATTGCAGGAATTGTTATTAGTGGCTGGGCTTCTGGCTTGGCAGGTATGGGACAT
GCF_039564095.1	NZ_JBCNWE0100000261.13825.AOI_01	91.2;Enterocin_P	MRKKLFSLALIGIFGLVVTNFGTKVDAATRSYGNGVYCNNSKCWVNWGEAKENIAGIVISGWASGLAGMGH	ATGAGAAAAAAATTATTTAGTTTAGCTCTTATTGGAATATTTGGGTTAGTTGTGACAAATTTTGGTACAAAAGTTGATGCAGCTACGCGTTCATATGGTAATGGTGTTTATTGTAATAATAGTAAATGCTGGGTTAACTGGGGAGAAGCTAAAGAGAATATTGCAGGAATCGTTATTAGTGGCTGGGCTTCTGGTTTGGCAGGTATGGGACAT
GCF_039564095.1	NZ_JBCNWE0100000281.13818.AOI_01	14.2;Bac32	LKKTKLLVASLCLFSSLLAFTPSVSFSQNGGVVEAAAQRGYIYKKYPKGAKVPNKVKMLVNIRGKQTMRTCYLMSWTASSRTAKYYYYI	TTGAAAAAAACAAAATTATTGGTAGCTAGTTTGTGTTTGTTTAGCAGTTTATTAGCTTTCACCCCTTCTGTTTCATTTTCTCAAAATGGTGGAGTGGTTGAAGCTGCTGCTCAAAGAGGATATATCTACAAAAAATATCCAAAAGGTGCTAAAGTGCCAAATAAAGTTAAAATGTTAGTGAATATTAGAGGTAAACAAACTATGCGTACTTGTTACCTTATGAGTTGGACTGCTAGTAGTAGAACAGCCAAATATTATTACTACATT
GCF_039564095.1	NZ_JBCNWE0100000291.13832.AOI_01	87.2;Enterocin_L50b	MGAIAKLVTKFGWPLIKKFYKQIMQFIGQGWTIDQIEKWLKRH	ATGGGAGCAATCGCAAAACTAGTGACAAAGTTTGGGTGGCCACTAATCAAAAAATTCTACAAACAAATCATGCAATTTATTGGACAAGGATGGACAATAGATCAAATTGAAAAATGGCTAAAAAGACAT
GCF_039564095.1	NZ_JBCNWE0100000291.13832.AOI_01	86.2;Enterocin_L50a	MNKKNDWRSYIMGAIAKLVAKFGWPIVKKYYKQIMQFIGEGWAINKIIEWIKKHI	ATGAACAAAAAAAATGATTGGAGGAGTTATATTATGGGAGCAATCGCAAAATTAGTAGCAAAGTTTGGGTGGCCTATTGTTAAAAAATATTACAAACAAATTATGCAGTTTATTGGAGAAGGATGGGCAATTAACAAAATCATTGAGTGGATTAAAAAACATATT
GCF_039564095.1	NZ_JBCNWE0100000511.13834.AOI_01	63.3;Enterolysin_A	MENQDESLIKQYVKRRAKRRLFLWLFGTSAGLITILITVFVTLFLILAAGSIDNSDSDSSSGGETFTGEYSEGLPIYKEIKGRGPFSDEIAQYAVGAAVKYKLLPSVILSQYGYESAFGTSASARNDLNYFGITWFDGCLFPKGTARGIGGIEGGWYMKFPNSKAAFSYYGFMVATQSNFNACVGNKSPGASLLILGRGGYAAAGITGDSPYYTGCMSIITSNKLTEYDEFAIKHWGEGGNNNGTITGEWTNPFPGSSLDKSSFSGGQLFGTNPGGEFRPNGFHDGLDFGSVDHPGSEIHAVHVGKVVYVGNPGISGLGACVIVINYDGLNMVYQEFANSTGNSCVKVGDQVKVGQVIGIRDTAHLHLGFTRMDWRQAQGHAFTGDGTWIDPLPFLNSS…	ATGGAAAATCAAGATGAAAGTTTAATCAAGCAGTATGTTAAGCGTCGCGCAAAGCGGCGCTTATTTTTGTGGTTGTTTGGTACTTCTGCAGGTTTGATTACCATTTTGATCACTGTATTCGTGACCCTATTTTTAATACTTGCGGCTGGTTCGATTGATAATTCGGATTCAGATTCAAGCAGTGGTGGCGAAACTTTTACAGGAGAGTATTCGGAAGGATTGCCCATTTATAAAGAAATCAAAGGAAGAGGCCCTTTTTCTGATGAGATTGCGCAATATGCCGTAGGTGCAGCAGTGAAATATAAATTATTACCAAGTGTAATCCTTTCTCAATACGGTTACGAATCAGCGTTTGGTACGTCGGCGTCCGCAAGAAATGATCTCAACTATTTTGGAATT…
GCF_039564165.1	NZ_JBCNWF0100000491.13964.AOI_01	87.2;Enterocin_L50b	MGAIAKLVTKFGWPLIKKFYKQIMQFIGQGWTIDQIEKWLKRH	ATGGGAGCAATCGCAAAACTAGTGACAAAGTTTGGGTGGCCACTAATCAAAAAATTCTACAAACAAATCATGCAATTTATTGGACAAGGATGGACAATAGATCAAATTGAAAAATGGCTAAAAAGACAT
GCF_039564165.1	NZ_JBCNWF0100000491.13964.AOI_01	86.2;Enterocin_L50a	MNKKNDWRSYIMGAIAKLVAKFGWPIVKKYYKQIMQFIGEGWAINKIIEWIKKHI	ATGAACAAAAAAAATGATTGGAGGAGTTATATTATGGGAGCAATCGCAAAATTAGTAGCAAAGTTTGGGTGGCCTATTGTTAAAAAATATTACAAACAAATTATGCAGTTTATTGGAGAAGGATGGGCAATTAACAAAATCATTGAGTGGATTAAAAAACATATT
GCF_039564165.1	NZ_JBCNWF0100000581.13952.AOI_01	14.2;Bac32	LKKTKLLVASLCLFSSLLAFTPSVSFSQNGGVVEAAAQRGYIYKKYPKGAKVPNKVKMLVNIRGKQTMRTCYLMSWTASSRTAKYYYYI	TTGAAAAAAACAAAATTATTGGTAGCTAGTTTGTGTTTGTTTAGCAGTTTATTAGCTTTCACCCCTTCTGTTTCATTTTCTCAAAATGGTGGAGTGGTTGAAGCTGCTGCTCAAAGAGGATATATCTACAAAAAATATCCAAAAGGTGCTAAAGTGCCAAATAAAGTTAAAATGTTAGTAAATATTAGAGGTAAACAAACTATGCGTACTTGTTACCTTATGAGTTGGACTGCTAGTAGTAGAACAGCCAAATATTATTACTACATT
GCF_039564125.1	NZ_JBCNWG0100000381.13875.AOI_01	76.2;EJ97enterocin	VISMKFKFNPTGTIVKKLTQYEIAWFKNKHGYYPWEIPRC	GTGATTTCCATGAAATTTAAATTTAATCCCACAGGAACCATCGTAAAAAAATTAACTCAATATGAAATAGCATGGTTCAAAAATAAACATGGATACTATCCATGGGAAATTCCTAGATGC
GCF_039564145.1	NZ_JBCNWH0100000101.13914.AOI_01	76.2;EJ97enterocin	VISMKFKFNPTGTIVKKLTQYEIAWFKNKHGYYPWEIPRC	GTGATTTCCATGAAATTTAAATTTAATCCCACAGGAACCATCGTAAAAAAATTAACTCAATATGAAATAGCATGGTTCAAAAATAAACATGGATACTATCCATGGGAAATTCCTAGATGC
GCF_039564195.1	NZ_JBCNWI0100000181.14052.AOI_01	14.2;Bac32	LKKTKLLVASLRLFSSLLAFTPSVSFSQNGGVVEAAAQRGYIYKKYPKGAKVPNKVKMLVNIRGKQTMRTCYLMSWTASSRTAKYYYYI	TTGAAAAAAACAAAATTATTGGTAGCTAGTTTGCGTTTGTTTAGCAGTTTATTAGCTTTCACCCCTTCTGTTTCATTTTCTCAAAATGGTGGAGTGGTTGAAGCTGCTGCTCAAAGAGGATATATCTACAAAAAATATCCAAAAGGTGCTAAAGTGCCAAATAAAGTTAAAATGTTAGTAAATATTAGAGGTAAACAAACTATGCGTACTTGTTACCTTATGAGTTGGACTGCTAGTAGTAGAACAGCCAAATATTATTACTACATT
GCF_039564195.1	NZ_JBCNWI0100000311.14015.AOI_01	91.2;Enterocin_P	MRKKLFSLTLIGMFGLVVTNFGTKVDAATRSYGNGVYCNNSKCWVNWGEAKENIAGIVISGWASGLAGMGH	ATGAGAAAAAAATTATTTAGTTTAACTCTTATTGGAATGTTTGGATTAGTTGTGACGAATTTTGGTACAAAAGTTGATGCAGCTACGCGTTCATATGGTAATGGTGTTTATTGTAATAATAGTAAGTGCTGGGTTAACTGGGGAGAAGCTAAAGAAAATATTGCAGGAATTGTTATTAGTGGCTGGGCTTCTGGCTTGGCAGGTATGGGACAT
GCF_039564195.1	NZ_JBCNWI0100000321.14057.AOI_01	91.2;Enterocin_P	MRKKLFSLALIGIFGLVVTNFGTKVDAATRSYGNGVYCNNSKCWVNWGEAKENIAGIVISGWASGLAGMGH	ATGAGAAAAAAATTATTTAGTTTAGCTCTTATTGGAATATTTGGGTTAGTTGTGACAAATTTTGGTACAAAAGTTGATGCAGCTACGCGTTCATATGGTAATGGTGTTTATTGTAATAATAGTAAATGCTGGGTTAACTGGGGAGAAGCTAAAGAGAATATTGCAGGAATCGTTATTAGTGGCTGGGCTTCTGGTTTGGCAGGTATGGGACAT
GCF_039564195.1	NZ_JBCNWI0100000451.14081.AOI_01	63.3;Enterolysin_A	MENQDESLIKQYVKRRAKRRLFLWLFGTSAGLITILITVFVTLFLILAAGSIDNSDSDSSSGGETFTGEYSEGLPIYKEIKGRGPFSDEIAQYAVGAAVKYKLLPSVILSQYGYESAFGTSASARNDLNYFGITWFDGCLFPKGTARGIGGIEGGWYMKFPNSKAAFSYYGFMVATQSNFNACVGNKSPGASLLILGRGGYAAAGITGDSPYYTGCMSIITSNKLTEYDEFAIKHWGEGGNNNGTITGEWTNPFPGSSLDKSSFSGGQLFGTNPGGEFRPNGFHDGLDFGSVDHPGSEIHAVHVGKVVYVGNPGISGLGACVIVINYDGLNMVYQEFANSTGNSCVKVGDQVKVGQVIGIRDTAHLHLGFTRMDWRQAQGHAFTGDGTWIDPLPFLNSS…	ATGGAAAATCAAGATGAAAGTTTAATCAAGCAGTATGTTAAGCGTCGCGCAAAGCGGCGCTTATTTTTGTGGTTGTTTGGTACTTCTGCAGGTTTGATTACCATTTTGATCACTGTATTCGTGACCCTATTTTTAATACTTGCGGCTGGTTCGATTGATAATTCGGATTCAGATTCAAGCAGTGGTGGCGAAACTTTTACAGGAGAGTATTCGGAAGGATTGCCCATTTATAAAGAAATCAAAGGAAGAGGCCCTTTTTCTGATGAGATTGCGCAATATGCCGTAGGTGCAGCAGTGAAATATAAATTATTACCAAGTGTAATCCTTTCTCAATACGGTTACGAATCAGCGTTTGGTACGTCGGCGTCCGCAAGAAATGATCTCAACTATTTTGGAATT…
GCF_041196885.1	NZ_JBFSLT0100000201.14331.AOI_01	63.3;Enterolysin_A	MENQDESLIKQYVKRRAKRRLFLWLFGTSAGLITILITVFVTLFLILAAGSIDNSDSDSSSGGETFTGEYSEGLPIYKEIKGRGPFSDEIAQYAVGAAVKYKLLPSVILSQYGYESAFSTSASARNDLNYFGITWFDGCLFPKGTARGIGGIEGGWYMKFPNSKAAFSYYGFMVATQSNFNACVGNKSPGASLLILGRGGYAAAGITEDSPYYTGCMSIITSNKLTEYDEFAIKHWGEGGNNNGTITGEWTNPFPGSSLDKSSFSGGQLFGTNPGGEFRPNGFHDGLDFGSVDHPGSEIHAVHVGKVVYVGNPGISGLGACVIVINYDGLNMVYQEFANSTGNSCVKVGDQVKVGQVIGIRDTAHLHLGFTRMDWRQAQGHAFTGDGTWIDPLPFLNSS…	ATGGAAAATCAAGATGAAAGTTTAATCAAGCAGTATGTTAAGCGTCGCGCAAAGCGGCGCTTATTTTTGTGGTTGTTTGGTACTTCTGCAGGTTTGATTACCATTTTGATCACTGTATTCGTGACCCTATTTTTAATACTTGCGGCTGGTTCGATTGATAATTCGGATTCAGATTCAAGCAGTGGTGGCGAAACTTTTACAGGAGAGTATTCGGAAGGATTGCCCATTTATAAAGAAATCAAAGGAAGAGGCCCTTTTTCTGATGAGATTGCGCAATATGCCGTAGGTGCAGCAGTGAAATATAAATTATTACCAAGTGTAATCCTTTCTCAATACGGTTACGAATCAGCGTTTAGTACGTCGGCGTCCGCAAGAAATGATCTCAACTATTTTGGAATT…
GCF_041196885.1	NZ_JBFSLT0100000241.14329.AOI_01	91.2;Enterocin_P	MRKKLFSLTLIGKFGLVVTNFGTKVDAATRSYGNGVYCNNSKCWVNWGEAKENIAGIVISGWASGLAGMGH	ATGAGAAAAAAATTATTTAGTTTAACTCTTATTGGAAAGTTTGGATTAGTTGTGACGAATTTTGGTACAAAAGTTGATGCAGCTACGCGTTCATATGGTAATGGTGTTTATTGTAATAATAGTAAGTGCTGGGTTAACTGGGGAGAAGCTAAAGAAAATATTGCAGGAATTGTTATTAGTGGCTGGGCTTCTGGCTTGGCAGGTATGGGACAT
GCF_041196885.1	NZ_JBFSLT0100000321.14335.AOI_01	86.2;Enterocin_L50a	MNKKNDWRSYIMGAIAKLVAKFGWPIVKKYYKQIMQFIGEGWAINKIIEWIKKHI	ATGAACAAAAAAAATGATTGGAGGAGTTATATTATGGGAGCAATCGCAAAATTAGTAGCAAAGTTTGGGTGGCCTATTGTTAAAAAATATTACAAACAAATTATGCAGTTTATTGGAGAAGGATGGGCAATTAACAAAATCATTGAGTGGATTAAAAAACATATT
GCF_041196885.1	NZ_JBFSLT0100000321.14335.AOI_01	87.2;Enterocin_L50b	MGAIAKLVTKFGWPLIKKFYKQIMQFIGQGWTIDQIEKWLKRH	ATGGGAGCAATCGCAAAACTAGTGACAAAGTTTGGGTGGCCACTAATCAAAAAATTCTACAAACAAATCATGCAATTTATTGGACAAGGATGGACAATAGATCAAATTGAAAAATGGCTAAAAAGACAT
GCF_041196885.1	NZ_JBFSLT0100000401.14316.AOI_01	91.2;Enterocin_P	MRKKLFSLALIGIFGLVVTNFGTKVDAATRSYGNGVYCNNSKCWVNWGEAKENIAGIVISGWASGLAGMGH	ATGAGAAAAAAATTATTTAGTTTAGCTCTTATTGGAATATTTGGGTTAGTTGTGACAAATTTTGGTACAAAAGTTGATGCAGCTACGCGTTCATATGGTAATGGTGTTTATTGTAATAATAGTAAATGCTGGGTTAACTGGGGAGAAGCTAAAGAGAATATTGCAGGAATCGTTATTAGTGGCTGGGCTTCTGGTTTGGCAGGTATGGGACAT
GCF_041196885.1	NZ_JBFSLT0100000521.14320.AOI_01	95.2;Enterocin_SE-K4	LILGIVLLSVSTLGITVDAATYYGNGVYCNTQKCWVDWSRARSEIVDRGVKAYVNGFTKVLGGVGGR	TTGATTTTAGGAATTGTTTTATTGAGTGTATCTACTTTAGGAATTACAGTAGATGCTGCAACTTATTATGGAAATGGTGTTTATTGTAATACTCAAAAATGTTGGGTAGATTGGAGTAGAGCTCGCTCTGAGATTGTTGATAGAGGAGTAAAAGCTTACGTTAATGGTTTTACGAAAGTGCTAGGTGGAGTCGGTGGAAGA
GCF_041196675.1	NZ_JBFTFI0100000081.14297.AOI_01	81.2;Enterocin_A	MKHLKILSIKETQLIYGGTTHSGKYYGNGVYCTKNKCTVDWAKATTCIAGMSIGGFLGGAIPGKC	ATGAAACATTTAAAAATTTTGTCTATTAAAGAGACACAACTTATCTATGGGGGTACCACTCATAGTGGAAAATATTATGGAAATGGAGTGTATTGCACTAAAAATAAATGTACGGTCGATTGGGCCAAGGCAACTACTTGTATTGCAGGAATGTCTATAGGTGGTTTTTTAGGTGGAGCAATTCCAGGGAAGTGC
GCF_041196675.1	NZ_JBFTFI0100000121.14286.AOI_01	91.2;Enterocin_P	MKRKLFSLALIGMFGLVVTGFGTKVDAATRSYGNGVYCNDDKCWVNWNEANQQIAGIVISGWASGLAGA	ATGAAAAGAAAATTATTTAGTTTAGCTCTTATCGGAATGTTTGGGTTAGTAGTGACAGGTTTTGGTACAAAAGTTGATGCAGCTACACGTTCATATGGTAATGGTGTTTATTGTAATGATGATAAATGCTGGGTGAACTGGAATGAAGCAAATCAACAAATCGCTGGAATTGTGATTAGTGGTTGGGCTTCTGGTTTGGCAGGTGCA
GCF_041196675.1	NZ_JBFTFI0100000151.14283.AOI_01	63.3;Enterolysin_A	MENQNESLIKQYVKRRAKRRLFLWLFGTSAGLMTILITVFVTLFLILAAGSIDNSDSDSSSGGEAFTGEYSEGLPIYKEIKGRGPFSDEIAQYAVGAAVKYKLLPSVILSQYGYESAFGTSASARNDLNYFGITWFDGCLFPKGTARGIGGIEGSWYMKFPNSKAAFSYYGFMVATQSNFNACVGNKSPGASLLILGRGGYAAAGITEDSPYYTGCMSIITSNKLTEYDEFAIKHWGEGNNNNGTITGEWTNPFPGSSLDKSSFSGGQLFGTNPWGEFRPNGFHDGLDFGSVDHPGSEIHAVHGGKVVYVGNPGISGLGACVIVINYDDLNMVYQEFANSTGNSRVKVGDQVKVGQVIGIRDTAHLHLGFTRMDWRQAQGHAFTDDGTWIDPLPFLNSS…	ATGGAAAACCAAAATGAAAGTTTAATCAAGCAGTATGTTAAGCGTCGTGCAAAGCGGCGCTTATTTTTGTGGTTGTTTGGTACTTCTGCAGGTTTGATGACTATTTTGATCACTGTGTTTGTGACCCTATTTCTAATACTTGCCGCGGGATCGATTGATAATTCGGATTCAGATTCAAGCAGTGGTGGCGAAGCTTTTACAGGAGAATATTCGGAAGGATTACCCATTTATAAAGAAATCAAAGGAAGAGGCCCTTTTTCTGATGAAATTGCGCAATATGCTGTAGGTGCAGCAGTGAAATATAAATTATTACCAAGTGTGATTCTTTCGCAATACGGTTATGAATCAGCGTTTGGTACGTCGGCGTCCGCAAGAAATGATCTCAACTATTTTGGGATT…
GCF_016767675.1	NZ_PGPI010000201.1179.AOI_01	63.3;Enterolysin_A	MENQNESLIKQYVKRRAKRRLFLWLFGTSAGLMTILITVFVTLFLILAAGSIDNSDSDSSSGGEAFTGEYSEGLPIYKEIKGRGPFSDEIAQYAVGAAVKYKLLPSVILSQYGYESAFGTSLSAKNDLNFFGITWFDGCLFPKGTARGIGGIEGGWYMKFPNSKAAFSYYGFMVATQSNFNASVGNKSPGVSLLILGRGGYAAAGITEDSPYYTGCMSIITSNKLTEYDELAIKHWGEGGNNNGTITGEWMNPFPGSSLDKSSFSGGQLFGTNPGGEFRPNGFHDGLDFGSVDHPGSEIHAVHGGKVVYVGNPGISGLGACVIVINYDGLNMVYQEFANSTGNSRVKVGDQVKVGQVIGIRDTAHLHLGFTRMDWRQAQGHAFTDDGTWIDPLPFLNSS…	ATGGAAAACCAAAATGAAAGTTTAATCAAGCAGTATGTTAAGCGTCGTGCAAAGCGGCGCTTATTTTTGTGGTTGTTTGGTACTTCTGCAGGTTTGATGACTATTTTGATCACTGTGTTTGTGACCCTATTTCTAATACTTGCCGCGGGATCGATTGATAATTCGGATTCAGATTCAAGCAGTGGTGGCGAAGCTTTTACAGGAGAATATTCGGAAGGATTACCCATTTATAAAGAAATCAAAGGAAGAGGCCCTTTTTCTGATGAAATTGCGCAATATGCTGTAGGTGCAGCAGTGAAATACAAATTATTGCCAAGTGTGATCCTATCGCAATACGGGTATGAATCGGCATTTGGAACGTCTCTATCTGCTAAAAACGACTTGAATTTTTTCGGAATT…
GCF_016767645.1	NZ_PGPJ010000211.1146.AOI_01	63.3;Enterolysin_A	MENQNESLIKQYVKRRAKRRLFLWLFGTSAGLMTILITVFVTLFLILAAGSIDNSDSDSSSGGEAFTGEYSEGLPIYKEIKGRGPFSDEIAQYAVGAAVKYKLLPSVILSQYGYESAFGTSLSAKNDLNFFGITWFDGCLFPKGTARGIGGIEGGWYMKFPNSKAAFSYYGFMVATQSNFNASVGNKSPGVSLLILGRGGYAAAGITEDSPYYTGCMSIITSNKLTEYDELAIKHWGEGGNNNGTITGEWMNPFPGSSLDKSSFSGGQLFGTNPGGEFRPNGFHDGLDFGSVDHPGSEIHAVHGGKVVYVGNPGISGLGACVIVINYDGLNMVYQEFANSTGNSRVKVGDQVKVGQVIGIRDTAHLHLGFTRMDWRQAQGHAFTDDGTWIDPLPFLNSS…	ATGGAAAACCAAAATGAAAGTTTAATCAAGCAGTATGTTAAGCGTCGTGCAAAGCGGCGCTTATTTTTGTGGTTGTTTGGTACTTCTGCAGGTTTGATGACTATTTTGATCACTGTGTTTGTGACCCTATTTCTAATACTTGCCGCGGGATCGATTGATAATTCGGATTCAGATTCAAGCAGTGGTGGCGAAGCTTTTACAGGAGAATATTCGGAAGGATTACCCATTTATAAAGAAATCAAAGGAAGAGGCCCTTTTTCTGATGAAATTGCGCAATATGCTGTAGGTGCAGCAGTGAAATACAAATTATTGCCAAGTGTGATCCTATCGCAATACGGGTATGAATCGGCATTTGGAACGTCTCTATCTGCTAAAAACGACTTGAATTTTTTCGGAATT…
GCF_016767645.1	NZ_PGPJ010000471.1098.AOI_01	225.2;UviB	MEKLLGSLLSNPEQISFAVLFVGLFIWVMQQNNAREKRYQSTIDKLTDALGDVEDIKSTVEKIHEKLQ	ATGGAAAAATTATTAGGGTCGTTGCTGTCAAATCCTGAACAAATTAGCTTTGCTGTTTTATTCGTGGGTTTATTTATTTGGGTAATGCAACAGAATAACGCAAGAGAAAAAAGATATCAAAGTACGATCGATAAACTGACGGATGCTCTGGGCGATGTGGAAGATATCAAAAGTACAGTAGAGAAAATTCACGAAAAACTACAG
GCF_016767645.1	NZ_PGPJ010000561.1120.AOI_01	91.2;Enterocin_P	VTNFGTKVDAVTRSYDNGIYCNNSKCWVNWGEAKENIAGIVISGWASGLAGMGH	GTGACGAATTTTGGTACAAAAGTTGATGCAGTTACGCGTTCATATGATAATGGTATTTATTGTAATAATAGTAAGTGCTGGGTTAACTGGGGAGAAGCTAAAGAAAATATTGCAGGAATTGTTATTAGTGGCTGGGCTTCTGGCTTGGCAGGTATGGGACAT
GCF_016767635.1	NZ_PGPK010000231.1049.AOI_01	63.3;Enterolysin_A	MENQNESLIKQYVKRRAKRRLFLWLFGTSAGLMTILITVFVTLFLILAAGSIDNSDSDSSSGGEAFTGEYSEGLPIYKEIKGRGPFSDEIAQYAVGAAVKYKLLPSVILSQYGYESAFGTSLSAKNDLNFFGITWFDGCLFPKGTARGIGGIEGGWYMKFPNSKAAFSYYGFMVATQSNFNASVGNKSPGASLLILGRGGYAAAGITEDSPYYTGCMSIITSNKLTEYDEFAIKHWGEGGNDNGTITGEWTNPFPGSSLDKSSFSGGQLFGTNPGGEFRPNGFHDGLDFGSVDHPGSEIHAVHGGKVVYVGNPGISGLGACVIVINYDGLNMVYQEFANSTGNSRVKVGDQVKVGQVIGIRDTAHLHLGFTRMDWRQAQGHAFTDDGTWIDPLPFLNSS…	ATGGAAAACCAAAATGAAAGTTTAATCAAGCAGTATGTTAAGCGTCGTGCAAAGCGACGCTTATTTTTGTGGTTGTTTGGTACTTCTGCAGGTTTGATGACTATTTTGATCACTGTGTTCGTGACCCTTTTTCTAATACTTGCGGCGGGTTCGATTGATAATTCGGATTCAGATTCAAGCAGTGGTGGCGAAGCTTTTACAGGAGAATATTCGGAAGGATTACCGATTTATAAAGAAATCAAAGGGAGAGGCCCATTTTCAGATGAAATTGCGCAATATGCGGTAGGAGCAGCCGTAAAATACAAATTATTGCCAAGTGTGATCCTATCGCAATACGGGTATGAATCGGCATTTGGAACGTCTCTATCTGCTAAAAACGACTTGAATTTTTTCGGAATT…
GCF_016767615.1	NZ_PGPM010000211.974.AOI_01	63.3;Enterolysin_A	MENQNESLIKQYVKRRAKRRLFLWLFGTSAGLITILITVFVTLFLILAAGSIDNSDSDSSSGGEAFTGEYSEGLPIYKKIKGRGPFSDEIAQYAVGAAVKYKLLPSVILSQYGYESAFGTSLSAKNDLNFFGITWFDGCLFPKGTARGIGGIEGGWYMKFPNSKAAFSYYGFMVATQSNFNASVGNKSPGASLLILGRGGYAAAGITEDSPYYTGCMSIITSNKLTEYDEFAIKHWGEGGNDNGTITGEWTNPFPGSSLDKSSFSGGQLFGTNPGGEFRPNGFHDGLDFGSVDHPGSEIHAVHGGKVVYVGNPGISGLGACVIVINYDGLNMVYQEFANSTGNSRVKVGDQVKVGQVIGIRDTAHLHLGFTRMDWRQAQGHAFTDDGTWIDPLPFLNSS…	ATGGAAAACCAAAATGAAAGTTTAATCAAGCAGTATGTTAAGCGTCGTGCAAAGCGACGCTTATTTTTGTGGTTGTTTGGTACTTCTGCAGGTTTGATTACTATTTTGATTACTGTGTTCGTGACCCTTTTTCTAATACTTGCGGCGGGTTCGATTGATAATTCGGATTCAGATTCAAGTAGTGGTGGCGAAGCTTTTACAGGAGAATATTCGGAAGGATTACCCATTTATAAAAAAATCAAAGGAAGAGGCCCTTTTTCTGATGAGATTGCGCAATATGCGGTAGGAGCAGCCGTAAAATACAAATTATTGCCAAGTGTGATCCTATCGCAATACGGGTATGAATCGGCATTTGGAACGTCTCTATCTGCTAAAAACGACTTGAATTTTTTCGGAATT…
GCF_016767595.1	NZ_PGPO010000231.859.AOI_01	63.3;Enterolysin_A	MENQNESLIKQYVKRRAKRRLFLWLFGTSAGLITILITVFVTLFLILAAGSIDNSDSDSSSGGEAFTGEYSEGLPIYKKIKGRGPFSDEIAQYAVGAAVKYKLLPSVILSQYGYESAFGTSLSAKNDLNFFGITWFDGCLFPKGTARGIGGIEGGWYMKFPNSKAAFSYYGFMVATQSNFNASVGNKSPGASLLILGRGGYAAAGITEDSPYYTGCMSIITSNKLTEYDEFAIKHWGEGGNDNGTITGEWTNPFPGSSLDKSSFSGGQLFGTNPGGEFRPNGFHDGLDFGSVDHPGSEIHAVHGGKVVYVGNPGISGLGACVIVINYDGLNMVYQEFANSTGNSRVKVGDQVKVGQVIGIRDTAHLHLGFTRMDWRQAQGHAFTDDGTWIDPLPFLNSS…	ATGGAAAACCAAAATGAAAGTTTAATCAAGCAGTATGTTAAGCGTCGTGCAAAGCGACGCTTATTTTTGTGGTTGTTTGGTACTTCTGCAGGTTTGATTACTATTTTGATTACTGTGTTCGTGACCCTTTTTCTAATACTTGCGGCGGGTTCGATTGATAATTCGGATTCAGATTCAAGTAGTGGTGGCGAAGCTTTTACAGGAGAATATTCGGAAGGATTACCCATTTATAAAAAAATCAAAGGAAGAGGCCCTTTTTCTGATGAGATTGCGCAATATGCGGTAGGAGCAGCCGTAAAATACAAATTATTGCCAAGTGTGATCCTATCGCAATACGGGTATGAATCGGCATTTGGAACGTCTCTATCTGCTAAAAACGACTTGAATTTTTTCGGAATT…
GCF_016767545.1	NZ_PGPQ010000041.788.AOI_01	81.2;Enterocin_A	MKHLKILSIKETQLIYGGTTHSGKYYGNGVYCTKNKCTVDWAKATTCIAGMSIGGFLGGAIPGKC	ATGAAACATTTAAAAATTTTGTCTATTAAAGAGACACAACTTATCTATGGGGGTACCACTCATAGTGGAAAATATTATGGAAATGGAGTGTATTGCACTAAAAATAAATGTACGGTCGATTGGGCCAAGGCAACTACTTGTATTGCAGGAATGTCTATAGGTGGTTTTTTAGGTGGAGCAATTCCAGGGAAGTGC
GCF_016767545.1	NZ_PGPQ010000041.788.AOI_01	113.2;Lactacin_F,subunit_lafX	MHIKNTKTTFILSSEELKNIQGGSAVGVLGTTFSGATAGVKLCSAGGPYAIAACGVGGALLGAGFGMWTGAVNNx	ATGCATATTAAAAACACAAAAACAACATTTATATTATCTTCAGAAGAGTTGAAAAATATTCAAGGTGGGAGTGCCGTGGGAGTTTTAGGCACTACTTTTTCTGGGGCAACAGCAGGAGTAAAACTTTGTTCAGCCGGAGGACCTTATGCAATAGCTGCTTGTGGTGTAGGTGGAGCTTTATTAGGTGCTGGATTCGGCATGTGGACCGGTGCCGTAAACAATTAA
GCF_016767545.1	NZ_PGPQ010000201.782.AOI_01	63.3;Enterolysin_A	MENQNESLIKQYVKRRAKRRLFLWLFGTSAGLMTILITVFVTLFLILAAGSIDNSDSDSSSGGEAFTGEYSEGLPIYKEIKGRGPFSDEIAQYAVGAAVKYKLLPSVILSQYGYESAFGTSASARNDLNYFGITWFDGCLFPKGTARGIGGIEGSWYMKFPNSKAAFSYYGFMVATQSNFNACVGNKSPGASLLILGRGGYAAAGITEDSPYYTGCMSIITSNKLTEYDEFAIKHWGEGNNNNGTITGEWTNPFPGSSLDKSSFSGGQLFGTNPWGEFRPNGFHDGLDFGSVDHPGSEIHAVHGGKVVYVGNPGISGLGACVIVINYDDLNMVYQEFANSTGNSRVKVGDQVKVGQVIGIRDTAHLHLGFTRMDWRQAQGHAFTDDGTWIDPLPFLNSS…	ATGGAAAACCAAAATGAAAGTTTAATCAAGCAGTATGTTAAGCGTCGTGCAAAGCGGCGCTTATTTTTGTGGTTGTTTGGTACTTCTGCAGGTTTGATGACTATTTTGATCACTGTGTTTGTGACCCTATTTCTAATACTTGCCGCGGGATCGATTGATAATTCGGATTCAGATTCAAGCAGTGGTGGCGAAGCTTTTACAGGAGAATATTCGGAAGGATTACCCATTTATAAAGAAATCAAAGGAAGAGGCCCTTTTTCTGATGAAATTGCGCAATATGCTGTAGGTGCAGCAGTGAAATATAAATTATTACCAAGTGTGATTCTTTCGCAATACGGTTATGAATCAGCGTTTGGTACGTCGGCGTCCGCAAGAAATGATCTCAACTATTTTGGGATT…
GCF_016767545.1	NZ_PGPQ010000251.753.AOI_01	91.2;Enterocin_P	MKRKLFSLALIGMFGLVVTGFGTKVDAATRSYGNGVYCNDDKCWVNWNEANQQIAGIVISGWASGLAGA	ATGAAAAGAAAATTATTTAGTTTAGCTCTTATCGGAATGTTTGGGTTAGTAGTGACAGGTTTTGGTACAAAAGTTGATGCAGCTACACGTTCATATGGTAATGGTGTTTATTGTAATGATGATAAATGCTGGGTGAACTGGAATGAAGCAAATCAACAAATCGCTGGAATTGTGATTAGTGGTTGGGCTTCTGGTTTGGCAGGTGCA
GCF_016767515.1	NZ_PGPR010000041.659.AOI_01	81.2;Enterocin_A	MKHLKILSIKETQLIYGGTTHSGKYYGNGVYCTKNKCTVDWAKATTCIAGMSIGGFLGGAIPGKC	ATGAAACATTTAAAAATTTTGTCTATTAAAGAGACACAACTTATCTATGGGGGTACCACTCATAGTGGAAAATATTATGGAAATGGAGTGTATTGCACTAAAAATAAATGTACGGTCGATTGGGCCAAGGCAACTACTTGTATTGCAGGAATGTCTATAGGTGGTTTTTTAGGTGGAGCAATTCCAGGGAAGTGC
GCF_016767515.1	NZ_PGPR010000041.659.AOI_01	113.2;Lactacin_F,subunit_lafX	MHIKNTKTTFILSSEELKNIQGGSAVGVLGTTFSGATAGVKLCSAGGPYAIAACGVGGALLGAGFGMWTGAVNNx	ATGCATATTAAAAACACAAAAACAACATTTATATTATCTTCAGAAGAGTTGAAAAATATTCAAGGTGGGAGTGCCGTGGGAGTTTTAGGCACTACTTTTTCTGGGGCAACAGCAGGAGTAAAACTTTGTTCAGCCGGAGGACCTTATGCAATAGCTGCTTGTGGTGTAGGTGGAGCTTTATTAGGTGCTGGATTCGGCATGTGGACCGGTGCCGTAAACAATTAA
GCF_016767515.1	NZ_PGPR010000191.664.AOI_01	63.3;Enterolysin_A	MENQNESLIKQYVKRRAKRRLFLWLFGTSAGLMTILITVFVTLFLILAAGSIDNSDSDSSSGGEAFTGEYSEGLPIYKEIKGRGPFSDEIAQYAVGAAVKYKLLPSVILSQYGYESAFGTSASARNDLNYFGITWFDGCLFPKGTARGIGGIEGSWYMKFPNSKAAFSYYGFMVATQSNFNACVGNKSPGASLLILGRGGYAAAGITEDSPYYTGCMSIITSNKLTEYDEFAIKHWGEGNNNNGTITGEWTNPFPGSSLDKSSFSGGQLFGTNPWGEFRPNGFHDGLDFGSVDHPGSEIHAVHGGKVVYVGNPGISGLGACVIVINYDDLNMVYQEFANSTGNSRVKVGDQVKVGQVIGIRDTAHLHLGFTRMDWRQAQGHAFTDDGTWIDPLPFLNSS…	ATGGAAAACCAAAATGAAAGTTTAATCAAGCAGTATGTTAAGCGTCGTGCAAAGCGGCGCTTATTTTTGTGGTTGTTTGGTACTTCTGCAGGTTTGATGACTATTTTGATCACTGTGTTTGTGACCCTATTTCTAATACTTGCCGCGGGATCGATTGATAATTCGGATTCAGATTCAAGCAGTGGTGGCGAAGCTTTTACAGGAGAATATTCGGAAGGATTACCCATTTATAAAGAAATCAAAGGAAGAGGCCCTTTTTCTGATGAAATTGCGCAATATGCTGTAGGTGCAGCAGTGAAATATAAATTATTACCAAGTGTGATTCTTTCGCAATACGGTTATGAATCAGCGTTTGGTACGTCGGCGTCCGCAAGAAATGATCTCAACTATTTTGGGATT…
GCF_016767515.1	NZ_PGPR010000231.652.AOI_01	91.2;Enterocin_P	MKRKLFSLALIGMFGLVVTGFGTKVDAATRSYGNGVYCNDDKCWVNWNEANQQIAGIVISGWASGLAGA	ATGAAAAGAAAATTATTTAGTTTAGCTCTTATCGGAATGTTTGGGTTAGTAGTGACAGGTTTTGGTACAAAAGTTGATGCAGCTACACGTTCATATGGTAATGGTGTTTATTGTAATGATGATAAATGCTGGGTGAACTGGAATGAAGCAAATCAACAAATCGCTGGAATTGTGATTAGTGGTTGGGCTTCTGGTTTGGCAGGTGCA
GCF_016767535.1	NZ_PGQJ010000261.744.AOI_01	95.2;Enterocin_SE-K4	MKKKFVSIFMILGIVLLSVSTLGITVDAATYYGNGVYCNTQKCWVDWSRARSEIVDRGVKVYVNGFTKVLGGVGGR	ATGAAGAAAAAATTTGTTAGTATTTTTATGATTTTAGGAATTGTTTTATTGAGTGTATCTACTTTAGGAATTACAGTAGATGCTGCAACTTATTATGGAAATGGTGTTTATTGTAATACTCAAAAATGTTGGGTAGATTGGAGTAGAGCTCGCTCTGAGATTGTTGATAGAGGAGTAAAAGTTTACGTTAATGGTTTTACGAAAGTGCTAGGTGGAGTCGGTGGAAGA
GCF_016767535.1	NZ_PGQJ010000261.744.AOI_02	63.3;Enterolysin_A	MENQNESLIKQYVKRRAKRRLFLWLFGTSAGLMTILITVFVTLFLILAAGSIDNSDSDSSSGGEAFTGEYSEGLPIYKEIKGRGPFSDEIAQYAVGAAVKYKLLPSVILSQYGYESAFGTSLSAKNDLNFFGITWLDGCLFPKGTARGIGGIEGGWYMKFPNSKAAFSYYGFMVATQSNFNASVGNKSPGASLLILGRGGYAAAGITEDSPYYTGCMSIITSNKLTEYDEFAIKHWGEGGNDNGTITGEWTNPFPGSSLDKSSFSGGQLFGTNPGGEFRPNGFHDGLDFGSVDHPGSEIHAVHGGKVVYVGNPGISGLGACVIVINYDGLNMVYQEFANSTGNSRVKVGDQVKVGQVIGIRDTAHLHLGFTRMDWRQAQGHAFTDDGTWIDPLPFLNSS…	ATGGAAAACCAAAATGAAAGTTTAATCAAGCAGTATGTTAAGCGTCGTGCAAAGCGACGCTTATTTTTGTGGTTGTTTGGTACTTCTGCAGGTTTGATGACTATTTTGATCACTGTGTTCGTGACCCTTTTTCTAATACTTGCGGCGGGTTCGATTGATAATTCGGATTCAGATTCAAGCAGTGGTGGCGAAGCTTTTACAGGAGAATATTCGGAAGGATTACCGATTTATAAAGAAATCAAAGGGAGAGGCCCATTTTCAGATGAAATTGCGCAATATGCGGTAGGAGCAGCCGTAAAATACAAATTATTGCCAAGTGTGATCCTATCGCAATACGGGTATGAATCGGCATTTGGAACGTCTCTATCTGCTAAAAACGACTTGAATTTTTTCGGAATT…
GCF_016767535.1	NZ_PGQJ010000641.724.AOI_01	91.2;Enterocin_P	MRKKLFSLTLIGMFGLVVTNFGTKVDAATRSYGNGVYCNNSKCWVNWGEAKENIAGIVISGWASGLAGMGH	ATGAGAAAAAAATTATTTAGTTTAACTCTTATTGGAATGTTTGGATTAGTTGTGACGAATTTTGGTACAAAAGTTGATGCAGCTACGCGTTCATATGGTAATGGTGTTTATTGTAATAATAGTAAGTGCTGGGTTAACTGGGGAGAAGCTAAAGAAAATATTGCAGGAATTGTTATTAGTGGCTGGGCTTCTGGCTTGGCAGGTATGGGACAT
GCF_016767575.1	NZ_PGQL010000201.817.AOI_01	95.2;Enterocin_SE-K4	LILGIVLLSVSTLGITVDAATYYGNGVYCNTQKCWVDWSRARSEIVDRGVKAYVNGFTKVLGGVGGR	TTGATTTTAGGAATTGTTTTATTGAGTGTATCTACTTTAGGAATTACAGTAGATGCTGCAACTTATTATGGAAATGGTGTTTATTGTAATACTCAAAAATGTTGGGTAGATTGGAGTAGAGCTCGCTCTGAGATTGTTGATAGAGGAGTAAAAGCTTACGTTAATGGTTTTACAAAAGTGCTAGGTGGAGTCGGTGGAAGA
GCF_016767575.1	NZ_PGQL010000201.817.AOI_02	63.3;Enterolysin_A	MENQNESLIKQYVKRRAKRRLFLWLFGTSAGLITILITVFVTLFLILAAGSIDNSDSDSSSGGEAFTGEYSEGLPIYKEIKGRGPFSDEIAQYAVGAAVKYKLLPSVILSQYGYESAFGTSASARNDLNYFGITWFDGCLFPKGTARGIGGIEGGWYMKFPNSKAAFSYYGFMVATQSNFNACVGNKSPGASLLILGRGGYAAAGITEDSPYYTGCMSIITSNKLTEYDEFAMKHWGEGGNDNGTITGEWTNPFPGSSLDKSSFSGGQLFGTNPGGEFRPNGFHDGLDFGSVDHPGSEIHAVHGGKVVYVGNPGISGLGACVIVINYDGLNMVYQEFANSTGNSRVKVGDQVKVGQVIGIRDTAHLHLGFTRMDWRQAQGHAFTDDGTWIDPLPFLNSS…	ATGGAAAACCAAAATGAAAGTTTAATCAAGCAGTATGTTAAGCGTCGTGCAAAGCGACGCTTATTTTTGTGGTTGTTTGGTACTTCTGCAGGTTTGATTACTATTTTGATTACTGTGTTCGTGACCCTTTTTCTAATACTTGCGGCGGGTTCGATTGATAATTCTGATTCAGATTCAAGTAGTGGTGGCGAAGCTTTTACAGGAGAATATTCGGAAGGATTACCCATTTATAAAGAAATCAAAGGAAGAGGCCCTTTTTCTGATGAGATTGCGCAATATGCCGTAGGTGCAGCAGTAAAATATAAATTATTACCAAGTGTGATTCTTTCGCAATACGGTTATGAATCAGCGTTTGGTACGTCGGCGTCCGCAAGAAATGATCTCAACTATTTTGGGATT…
GCF_016767495.1	NZ_PGQM010000261.604.AOI_01	95.2;Enterocin_SE-K4	LILGIVLLSVSTLGITVDAATYYGNGVYCNTQKCWVDWSRARSEIVDRGVKAYVNGFTKVLGGVGGR	TTGATTTTAGGAATTGTTTTATTGAGTGTATCTACTTTAGGAATTACAGTAGATGCTGCAACTTATTATGGAAATGGTGTTTATTGTAATACTCAAAAATGTTGGGTAGATTGGAGTAGAGCTCGCTCTGAGATTGTTGATAGAGGAGTAAAAGCTTACGTTAATGGTTTTACAAAAGTGCTAGGTGGAGTCGGTGGAAGA
GCF_016767495.1	NZ_PGQM010000261.604.AOI_02	63.3;Enterolysin_A	MENQNESLIKQYVKRRAKRRLFLWLFGTSAGLITILITVFVTLFLILAAGSIDNSDSDSSSGGEAFTGEYSEGLPIYKEIKGRGPFSDEIAQYAVGAAVKYKLLPSVILSQYGYESAFGTSASARNDLNYFGITWFDGCLFPKGTARGIGGIEGGWYMKFPNSKAAFSYYGFMVATQSNFNACVGNKSPGASLLILGRGGYAAAGITEDSPYYTGCMSIITSNKLTEYDEFAMKHWGEGGNDNGTITGEWTNPFPGSSLDKSSFSGGQLFGTNPGGEFRPNGFHDGLDFGSVDHPGSEIHAVHGGKVVYVGNPGISGLGACVIVINYDGLNMVYQEFANSTGNSRVKVGDQVKVGQVIGIRDTAHLHLGFTRMDWRQAQGHAFTDDGTWIDPLPFLNSS…	ATGGAAAACCAAAATGAAAGTTTAATCAAGCAGTATGTTAAGCGTCGTGCAAAGCGACGCTTATTTTTGTGGTTGTTTGGTACTTCTGCAGGTTTGATTACTATTTTGATTACTGTGTTCGTGACCCTTTTTCTAATACTTGCGGCGGGTTCGATTGATAATTCTGATTCAGATTCAAGTAGTGGTGGCGAAGCTTTTACAGGAGAATATTCGGAAGGATTACCCATTTATAAAGAAATCAAAGGAAGAGGCCCTTTTTCTGATGAGATTGCGCAATATGCCGTAGGTGCAGCAGTAAAATATAAATTATTACCAAGTGTGATTCTTTCGCAATACGGTTATGAATCAGCGTTTGGTACGTCGGCGTCCGCAAGAAATGATCTCAACTATTTTGGGATT…
GCF_005116555.1	NZ_SWBS010000081.1.AOI_01	81.2;Enterocin_A	MKHLKILSIKETQLIYGGTTHSGKYYGNGVYCTKNKCTVDWAKATTCIAGMSIGGFLGGAIPGKC	ATGAAACATTTAAAAATTTTGTCTATTAAAGAGACACAACTTATCTATGGGGGTACCACTCATAGTGGAAAATATTATGGAAATGGAGTGTATTGCACTAAAAATAAATGTACGGTCGATTGGGCCAAGGCAACTACTTGTATTGCAGGAATGTCTATAGGTGGTTTTTTAGGTGGAGCAATTCCAGGGAAGTGC
GCF_005116555.1	NZ_SWBS010000161.31.AOI_01	91.2;Enterocin_P	MKRKLFSLALIGMFGLVVTGFGTKVDAATRSYGNGVYCNDDKCWVNWNEANQQIAGIVISGWASGLAGA	ATGAAAAGAAAATTATTTAGTTTAGCTCTTATCGGAATGTTTGGGTTAGTAGTGACAGGTTTTGGTACAAAAGTTGATGCAGCTACACGTTCATATGGTAATGGTGTTTATTGTAATGATGATAAATGCTGGGTGAACTGGAATGAAGCAAATCAACAAATCGCTGGAATTGTGATTAGTGGTTGGGCTTCTGGTTTGGCAGGTGCA
GCF_005116555.1	NZ_SWBS010000221.16.AOI_01	63.3;Enterolysin_A	MENQNESLIKQYVKRRAKRRLFLWLFGTSAGLMTILITVFVTLFLILAAGSIDNSDSDSSSGGEAFTGEYSEGLPIYKEIKGRGPFSDEIAQYAVGAAVKYKLLPSVILSQYGYESAFGTSASARNDLNYFGITWFDGCLFPKGTARGIGGIEGSWYMKFPNSKAAFSYYGFMVATQSNFNACVGNKSPGASLLILGRGGYAAAGITEDSPYYTGCMSIITSNKLTEYDEFAIKHWGEGNNNNGTITGEWTNPFPGSSLDKSSFSGGQLFGTNPWGEFRPNGFHDGLDFGSVDHPGSEIHAVHGGKVVYVGNPGISGLGACVIVINYDDLNMVYQEFANSTGNSRVKVGDQVKVGQVIGIRDTAHLHLGFTRMDWRQAQGHAFTDDGTWIDPLPFLNSS…	ATGGAAAACCAAAATGAAAGTTTAATCAAGCAGTATGTTAAGCGTCGTGCAAAGCGGCGCTTATTTTTGTGGTTGTTTGGTACTTCTGCAGGTTTGATGACTATTTTGATCACTGTGTTTGTGACCCTATTTCTAATACTTGCCGCGGGATCGATTGATAATTCGGATTCAGATTCAAGCAGTGGTGGCGAAGCTTTTACAGGAGAATATTCGGAAGGATTACCCATTTATAAAGAAATCAAAGGAAGAGGCCCTTTTTCTGATGAAATTGCGCAATATGCTGTAGGTGCAGCAGTGAAATATAAATTATTACCAAGTGTGATTCTTTCGCAATACGGTTATGAATCAGCGTTTGGTACGTCGGCGTCCGCAAGAAATGATCTCAACTATTTTGGGATT…
GCF_017356435.1	NZ_VOEA010000151.1262.AOI_01	76.2;EJ97enterocin	VISMKFKFNPTGTIVKKLTQYEIAWFKNKHGYYPWEIPRC	GTGATTTCCATGAAATTTAAATTTAATCCCACAGGAACCATCGTAAAAAAATTAACTCAATATGAAATAGCATGGTTCAAAAATAAACATGGATACTATCCATGGGAAATTCCTAGATGC
GCF_009735405.1	NZ_WOTP010000391.40.AOI_01	76.2;EJ97enterocin	VISMKFKFNPTGTIVKKLTQYEIAWFKNKHGYYPWEIPRC	GTGATTTCCATGAAATTTAAATTTAATCCCACAGGAACCATCGTAAAAAAATTAACTCAATATGAAATAGCATGGTTCAAAAATAAACATGGATACTATCCATGGGAAATTCCTAGATGC
GCF_009735445.1	NZ_WOTQ010000031.159.AOI_01	225.2;UviB	MEKLLGSLLSNPEQISFAVLFVGLFIWVMQQNNAREKRYQSTIDKLTNALGDVEAIKSTVEKIHEKLQ	ATGGAAAAATTATTAGGATCGTTACTCTCAAACCCCGAACAAATCAGCTTCGCTGTTTTGTTTGTGGGTTTATTTATTTGGGTAATGCAGCAGAACAACGCACGAGAAAAAAGATATCAAAGTACTATTGATAAATTGACAAATGCATTGGGCGATGTGGAAGCAATCAAAAGCACTGTGGAGAAAATCCACGAAAAACTACAG
GCF_009735445.1	NZ_WOTQ010000211.136.AOI_01	95.2;Enterocin_SE-K4	LILGIVLLSVSTLGITVDAATYYGNGVYCNTQKCWVDWSRARSEIVDRGVKAYVNGFTKVLGGVGGR	TTGATTTTAGGAATTGTTTTATTGAGTGTATCTACTTTAGGAATTACAGTAGATGCTGCAACTTATTATGGAAATGGTGTTTATTGTAATACTCAAAAATGTTGGGTAGATTGGAGTAGAGCTCGCTCTGAGATTGTTGATAGAGGAGTAAAAGCTTACGTTAATGGTTTTACGAAAGTGCTAGGTGGAGTCGGTGGAAGA
GCF_009735445.1	NZ_WOTQ010000211.136.AOI_02	63.3;Enterolysin_A	MENQNESLIKQYVKRRAKRRLFLWLFGTSAGLITILITVFVTLFLILAAGSIDNSDSDSSSGGETFTGEYSEGLPIYKEIKGRGPFSDEIAQYAVGAAVKYKLLPSVILSQYGYESAFGTSASARNDLNYFGITWFDGCLFPKGTARGIGGIEGGWYMKFPNSKAAFSYYGFMVATQSNFNACVGNKSPGASLLILGRGGYAAAGITEDSPYYTGCMSIITSNKLTEYDEFAIKHWGEGGNNNGTITGEWTNPFPGSSLDKSSFSGGQLFGTNPGGEFRPNGFHDGLDFGSVDHQGSEIHAVHGGKVVYVGNPGISGLGACVIVINYDGLNMVYQEFANSTGNSRVKVGDQVKVGQVIGIRDTAHLHLGFTRMDWRQAQGHAFTDDGTWIDPLPFLNSS…	ATGGAAAACCAAAATGAAAGTTTAATCAAGCAGTATGTTAAGCGTCGTGCAAAGCGACGCTTATTTTTGTGGTTGTTTGGTACTTCTGCAGGTTTGATTACTATTTTGATTACTGTGTTCGTGACCCTATTTTTAATACTTGCGGCTGGTTCGATTGATAATTCTGATTCAGATTCAAGCAGTGGTGGCGAAACTTTTACAGGAGAGTATTCGGAAGGATTGCCCATTTATAAAGAAATTAAAGGAAGAGGCCCTTTTTCTGATGAGATTGCGCAATATGCCGTAGGTGCAGCAGTGAAGTATAAATTATTACCAAGTGTGATCCTTTCGCAATACGGGTATGAATCAGCGTTTGGTACGTCGGCGTCTGCAAGAAATGATCTCAATTATTTTGGGATT…
GCF_009735445.1	NZ_WOTQ010000391.147.AOI_01	14.2;Bac32	LKKTKLLVASLCLFSSLLAFTPSVSFSQNGGVVEAAAQRGYIYKKYPKGAKVPNKVKMLVNIRGKQTMRTCYLMSWTASSRTAKYYYYI	TTGAAAAAAACAAAATTATTGGTAGCTAGTTTGTGTTTGTTTAGCAGTTTATTAGCTTTCACCCCTTCTGTTTCATTTTCTCAAAATGGTGGAGTGGTTGAAGCTGCTGCTCAAAGAGGATATATCTACAAAAAATATCCAAAAGGTGCTAAAGTGCCAAATAAAGTTAAAATGTTAGTAAATATTAGAGGTAAACAAACTATGCGTACTTGTTACCTTATGAGTTGGACTGCTAGTAGTAGAACAGCCAAATATTATTACTACATT
GCF_009735435.1	NZ_WOTR010000231.103.AOI_01	63.3;Enterolysin_A	MENQDESLIKQYVKRRAKRRLFLWLFGTSAGLITILITVFVTLFLILAAGSIDNSDSDSSSGGETFTGEYSEGLPIYKEIKGRGPFSDEIAQYAVGAAVKYKLLPSVILSQYGYESAFGTSASARNDLNYFGITWFDGCLFPKGTVRGIGGIEGGWYMKFPNSKAAFSYYGFMVATQSNFNACVGNKSPGASLLILGRGGYAAAGITEDSPYYTGCMSIITSNKLTEYDEFAIKHWGEGGNNNGTITGEWTNPFPGSSLDKSSFSGGQLFGTNPGGEFRPNGFHDGLDFGSVDHPGSEIHAVHVGKVVYVGNPGISGLGACVIVINYDGLNMVYQEFANSTGNSCVKVGDQVKVGQVIGIRDTAHLHLGFTHMDWRQAQGHAFTDDGTWIDPLPFLNSS…	ATGGAAAATCAAGATGAAAGTTTAATCAAGCAGTATGTTAAGCGTCGCGCAAAGCGGCGCTTATTTTTGTGGTTGTTTGGTACTTCTGCAGGTTTGATTACCATTTTGATCACTGTATTCGTGACCCTATTTTTAATACTTGCGGCTGGTTCGATTGATAATTCGGATTCAGATTCAAGCAGTGGTGGCGAAACTTTTACAGGAGAGTATTCGGAAGGATTGCCCATTTATAAAGAAATCAAAGGAAGAGGCCCTTTTTCTGATGAGATTGCGCAATATGCCGTAGGTGCAGCAGTGAAATATAAATTATTACCAAGTGTAATCCTTTCTCAATACGGTTACGAATCAGCGTTTGGTACGTCGGCGTCCGCAAGAAATGATCTCAACTATTTTGGAATT…
GCF_009735435.1	NZ_WOTR010000391.111.AOI_01	91.2;Enterocin_P	MRKKLFSLALIGIFGLVVTNFGTKVDAATRSYGNGVYCNNSKCWVNWGEAKENIAGIVISGWASGLAGMGH	ATGAGAAAAAAATTATTTAGTTTAGCTCTTATTGGAATATTTGGGTTAGTTGTGACAAATTTTGGTACAAAAGTTGATGCAGCTACGCGTTCATATGGTAATGGTGTTTATTGTAATAATAGTAAATGCTGGGTTAACTGGGGAGAAGCTAAAGAGAATATTGCAGGAATCGTTATTAGTGGCTGGGCTTCTGGTTTGGCAGGTATGGGACAT
GCF_009735435.1	NZ_WOTR010000461.117.AOI_01	95.2;Enterocin_SE-K4	LILGIVLLSVSTLGITVDAATYYGNGVYCNTQKCWVDWSRARSEIVDRGVKAYVNGFTKVLGGVGGR	TTGATTTTAGGAATTGTTTTATTGAGTGTATCTACTTTAGGAATTACAGTAGATGCTGCAACTTATTATGGAAATGGTGTTTATTGTAATACTCAAAAATGTTGGGTAGATTGGAGTAGAGCTCGCTCTGAGATTGTTGATAGAGGAGTAAAAGCTTACGTTAATGGTTTTACGAAAGTGCTAGGTGGAGTCGGTGGAAGA
GCF_009735495.1	NZ_WOTS010000211.276.AOI_01	63.3;Enterolysin_A	METQNESLIKQYVKRRAKRRLFLWLFGTSAGLMTILITVFVTLFLILAAGSIDNSDSDSSSGGEAFTGEYSEGLPIYKEIKGRGPFSDEIAQYAVGAAVKYKLLPSVILSQYGYESAFGTSLSAKNDLNFFGITWFDGCLFPKGTARGIGGIEGGWYMKFPNSKAAFSYYGFMVATQSNFNASVGNKSPGVSLLILGRGGYAAAGITEDSPYYTGCMSIITSNKLTEYDELAIKHWGEGGNNNGTITGEWMNPFPGSSLDKSSFSGGQLFGTNPGGEFRPNGFHDGLDFGSVDHPGSEIHAVHGGKVVYVGNPGISGLGACVIVINYDGLNMVYQEFANSTGNSRVKVGDQVKVGQVIGIRDTAHLHLGFTRMDWRQAQGHAFTDDGTWIDPLPFLNSS…	ATGGAAACCCAAAATGAAAGTTTAATCAAGCAGTATGTTAAGCGTCGTGCAAAGCGGCGCTTATTTTTGTGGTTGTTTGGTACTTCTGCAGGTTTGATGACTATTTTGATCACTGTGTTTGTGACCCTATTTCTAATACTTGCCGCGGGATCGATTGATAATTCGGATTCAGATTCAAGCAGTGGTGGCGAAGCTTTTACAGGAGAATATTCGGAAGGATTACCCATTTATAAAGAAATCAAAGGAAGAGGCCCTTTTTCTGATGAAATTGCGCAATATGCTGTAGGTGCAGCAGTGAAATACAAATTATTGCCAAGTGTGATCCTATCGCAATACGGGTATGAATCGGCATTTGGAACGTCTCTATCTGCTAAAAACGACTTGAATTTTTTCGGAATT…
GCF_009735475.1	NZ_WOTT010000241.197.AOI_01	95.2;Enterocin_SE-K4	LILGIVLLSVSTLGITVDAATYYGNGVYCNTQKCWVDWSRARSEIVDRGVKAYVNGFTKVLGGVGGR	TTGATTTTAGGAATTGTTTTATTGAGTGTATCTACTTTAGGAATTACAGTAGATGCTGCAACTTATTATGGAAATGGTGTTTATTGTAATACTCAAAAATGTTGGGTAGATTGGAGTAGAGCTCGCTCTGAGATTGTTGATAGAGGAGTAAAAGCTTACGTTAATGGTTTTACGAAAGTGCTAGGTGGAGTCGGTGGAAGA

## Sheet: E_mundtii
Assembly Accession	LOCUS	Bacteriocin (BAGEL4)	Sequences
GCF_000504125.1	NC_0228831.15.AOI_01	16.2;Bacteriocin_31	MKRKLVICGMISIVFSTLGRNIETATYYGNGVYCNKx	ATGAAAAGGAAGTTAGTTATTTGCGGTATGATTAGTATTGTTTTTTCAACATTAGGAAGAAATATAGAAACTGCTACGTATTACGGAAATGGTGTATATTGCAATAAATAA
GCF_000504125.1	NC_0228831.15.AOI_02	63.3;Enterolysin_A	MESQNESLIKQYVKRRTKRRLFLWLFGTSAGLLTLLITVFVTLFLILAAGSIDNSDSGSSSGGEAFTGEYSEGLPIYKEIKGKGPFSDEIVQYAVGAAVKYKLLPSVILSQYGYESAFGTSLSAKNDLNFFGITWFDGCLFPKGTARGVGGIEGGWYMKFPNSKAAFSYYGFMVATQSNFNACVGNKSPGASLLILGRGGYAAAGITEDSAYYKNCISIINSNQLTEYDEFAIKHWGEGGNNNGPITGEWTNPFPGSSLDKSSFSGGQLFGTNPGGEFRPNGFHDGLDFGSVDHPGSEIHAVHGGKVVYVGNPGISGLGACVIVINYDGLNMVYQEFANSTGNSRVKVGDQVKVGQVIATRDTEHLHLGFTRMDWLQAQGHAFIDDGTWIDPLPFLNSS…	ATGGAAAGCCAAAATGAAAGTTTAATCAAGCAGTATGTTAAGCGTCGTACAAAGCGACGCTTATTTTTGTGGTTGTTTGGTACTTCTGCAGGTTTGCTTACCCTCTTGATCACTGTGTTTGTGACGCTTTTTCTAATCCTTGCGGCGGGGTCGATTGATAACTCTGATTCAGGTTCAAGTAGTGGTGGTGAAGCTTTTACAGGAGAATACTCAGAAGGTTTACCCATCTATAAAGAAATCAAAGGGAAAGGGCCTTTTTCTGATGAGATTGTGCAATATGCCGTAGGAGCAGCCGTGAAATATAAATTATTACCAAGTGTGATTCTTTCGCAATACGGATATGAATCAGCGTTTGGCACGTCATTATCTGCTAAAAACGACTTGAATTTTTTTGGGATC…
GCF_000504125.1	NC_0228841.16.AOI_01	155.2;Mundticin_ATO6	LKKLTAKEMSQVVGGKYYGNGVSCNKKGCSVDWGKAIGIIGNNSAANLATGGAAGWKS	TTGAAGAAATTAACAGCAAAAGAAATGTCACAAGTAGTAGGTGGAAAATACTACGGTAATGGAGTCTCATGTAATAAAAAAGGGTGCAGTGTTGATTGGGGAAAAGCTATTGGCATTATTGGAAATAATTCTGCTGCGAATTTAGCTACTGGTGGAGCAGCTGGTTGGAAAAGT
GCF_013394305.1	NZ_AP0198121.1400.AOI_01	155.2;Mundticin_ATO6	LKKLTAKEMSQVVGGKYYGNGVSCNKKGCSVDWGKAIGIIGNNSAANLATGGAAGWKS	TTGAAGAAATTAACAGCAAAAGAAATGTCACAAGTAGTAGGTGGAAAATACTACGGTAATGGAGTCTCATGTAATAAAAAAGGGTGCAGTGTTGATTGGGGAAAAGCTATTGGCATTATTGGAAATAATTCTGCTGCGAATTTAGCTACTGGTGGAGCAGCTGGTTGGAAAAGT
GCF_000407465.1	NZ_ASWC010000011.12.AOI_01	225.2;UviB	MEKLIESLLSNPEQISFAVLFVGLLIWVMQQNNAREKRYQNTIDKLTDALGDVEAIKSTVEKIHEKLH	ATGGAAAAATTAATCGAATCGTTACTCTCAAACCCCGAACAGATCAGCTTTGCTGTTTTATTTGTAGGGTTACTTATCTGGGTGATGCAACAGAACAATGCCCGAGAAAAAAGGTATCAAAATACAATCGACAAGTTGACCGATGCGCTTGGTGATGTAGAAGCAATAAAAAGTACTGTGGAGAAAATTCACGAAAAATTACAT
GCF_007990125.1	NZ_BJWA010000251.740.AOI_01	63.3;Enterolysin_A	MDKQVENVIKQQIKRRMKRRLFLWLFGTSGGLFLLGLVLALVLFIAFAAGVPDQSGGTVGDVTFTGEYSEGLPMYDEIKGRGPFSDEIAQYAVGAAVKYKLLPSVILSQYGYESAFGTSLSAKNDLNYFGITWFDGCLFPKGTARGVGGIEGGWYMKFPTSQAAFSYYGFMVATQSNFNACVGNKSPGADLLILGRGGYAAAGITEDSAYYQGCMSIIESNHLTEYDEFAIKHWGEGNSSNGTITGEWTNPFPGTSLDQSSFSGGQLFGTNPGGEFRPNGFHDGLDFGSVDHPGSEIHAVHSGTVTYVGNPGISQLGACVIVINYDGLNMVYQEFTNNGSNARVKVGDQVKVGQVIAIRDTEHLHLGFTRMDWLEAQGHGYTNDGTWIDPLPLLNSSGG…	ATGGATAAGCAAGTGGAAAATGTGATCAAGCAACAAATCAAGCGTCGTATGAAGCGGCGCTTATTTTTGTGGCTTTTTGGGACGTCTGGAGGCTTGTTTTTATTAGGGCTTGTTCTAGCACTTGTACTATTTATAGCTTTTGCAGCAGGAGTTCCTGATCAGTCCGGAGGCACGGTTGGTGACGTTACATTTACGGGTGAATATTCTGAAGGACTCCCAATGTATGACGAAATCAAAGGACGTGGCCCTTTTTCAGACGAAATAGCGCAATACGCAGTTGGTGCAGCAGTAAAATACAAATTATTACCCAGTGTCATTCTTTCGCAGTACGGCTATGAGTCTGCTTTTGGAACGTCTTTATCTGCTAAGAATGATTTGAACTATTTTGGGATCACCTGG…
GCF_007990125.1	NZ_BJWA010000281.752.AOI_01	119.2;Lactococcin_972_(Lcn972)	LATGGIAASAATEYPDGGTWNYGVGITGSYSDYFHGTKRHSATVKKGSDESYQAQGAGVWAKARLGAYSGCNFYYNYW	TTGGCTACTGGTGGTATCGCTGCCTCAGCAGCAACGGAATACCCTGATGGTGGTACATGGAATTATGGTGTCGGTATCACAGGTTCATATTCTGATTATTTCCATGGTACTAAACGCCACAGCGCTACTGTAAAAAAAGGTTCAGACGAATCTTATCAAGCTCAAGGGGCTGGAGTGTGGGCTAAGGCTCGTCTTGGCGCATATTCAGGATGTAATTTCTATTATAATTATTGG
GCF_902387675.1	NZ_CABMMO0100000071.2465.AOI_01	93.3;Zoocin_A	MKKMSKLFCVATLLATPSATQMNKVFASEQDKATIDSSFIEESTIDSTTSTSDSSSQINEEIGTTESTVGDATISSTETTESTDDNKTDVTESSQQLEESTENTQEEQSSTNMGATPHPSGSINIPKPDFHRPTPPTIRQPDLSQFTTEPIYPENVNDSRRQETSKQTSAKSESIELFIKKIGEDARKIAQENDLYASVILAQAILESGAGSSILSQAPYYNLFGIKGAFNEQGVYLATQEDNGYGQQSVTLAQFRKYSGYEESFQDYAKLMKNGLIGNPTFYQGTWKSKTTSYHDATKALTGTYATDIYYGDKLDQLIETYELTEYDEAKEVIVSETNYCMPLDSYTVTSEFGIRGSEFHRGIDLAAPMGTPIKAAKAGKVIMADTHYSWGNYVVIQH…	ATGAAAAAAATGTCAAAACTTTTTTGTGTGGCTACGTTATTAGCTACGCCGTCCGCAACACAAATGAATAAAGTTTTTGCATCTGAACAGGATAAGGCAACGATTGATTCATCTTTTATTGAAGAAAGTACGATAGATTCAACCACAAGTACAAGTGATTCAAGTAGTCAAATAAATGAAGAAATAGGCACAACAGAAAGTACAGTGGGAGACGCAACGATTAGTTCGACAGAGACAACCGAAAGCACGGATGATAATAAAACAGACGTGACTGAGTCAAGCCAACAACTGGAAGAATCAACCGAAAATACGCAAGAAGAACAAAGTAGTACGAATATGGGAGCAACTCCCCATCCTTCTGGAAGTATAAACATTCCAAAACCAGACTTCCATAGGCCA…
GCF_902387675.1	NZ_CABMMO0100000121.2477.AOI_01	63.3;Enterolysin_A	MANQNDNLIKQYVKRRAKRRLFLWLFGTSAGLISILVTVFVTLFLILAAGSIDNSDSGSSSGDEAFTGEYSEGLPIYKEIKGKGPFSDEIAQYAVGAAVKYKLLPSVILSQYGYESAFGTSLSAKNDLNFFGITWFDGCLFPKGTARGVGGIEGGWYMKFPNSKAAFSYYGFMVATQSNFNACVGNKSPGASLLILGRGGYAAAGITEDSAYYKNCMSIINSNKLTEYDEFAIKHWGEGGNNNGPITGEWTNPFPGSSLDKSSFSGGQLFGTNPGGEFRPNGFHDGLDFGSVDHPGSEIHAVHGGKVVYVGNPGISGLGACVIVINYDGLNMVYQEFANSTGNSRVKVGDQVKVGQVIAIRDTEHLHLEFTRMDWRQAQGHAFIDDGTWIDPLPFLNSS…	ATGGCTAATCAAAATGACAATTTAATCAAGCAATATGTTAAGCGTCGTGCGAAACGGCGCTTATTTTTGTGGTTATTTGGTACTTCTGCTGGTTTGATTAGCATATTGGTCACTGTATTTGTGACTCTTTTTCTAATACTTGCGGCGGGTTCTATTGATAATTCAGATTCAGGATCAAGTAGTGGTGACGAAGCTTTTACAGGAGAATATTCGGAAGGATTACCAATCTATAAGGAAATCAAAGGTAAAGGTCCTTTTTCTGATGAGATTGCGCAATATGCCGTAGGAGCAGCAGTGAAATATAAATTATTACCAAGTGTAATTCTTTCCCAATACGGGTATGAGTCGGCGTTTGGGACGTCATTATCTGCTAAAAACGACTTGAATTTTTTCGGGATC…
GCF_002813755.1	NZ_CP0180611.353.AOI_01	119.2;Lactococcin_972_(Lcn972)	LATGGIAASAATEYPDGGTWNYGVGITGSYSDYFHGTKRHSATVKKGSDESYQAQGAGVWAKARLGAYSGCNFYYNYW	TTGGCTACTGGTGGTATCGCTGCCTCAGCAGCAACGGAATACCCTGATGGTGGTACATGGAATTATGGTGTCGGTATCACAGGTTCATATTCTGATTATTTCCATGGTACTAAACGCCACAGCGCTACTGTAAAAAAAGGTTCAGACGAATCTTATCAAGCTCAAGGGGCTGGAGTGTGGGCTAAGGCTCGTCTTGGCGCATATTCAGGATGTAATTTCTATTATAATTATTGG
GCF_002813755.1	NZ_CP0180611.353.AOI_02	63.3;Enterolysin_A	MMGILFLFFGVDDSETSGSATGGAEFIGVYSEDLPSYPEIKGVGNVPDEIAQLAVGSAIKYHLLPSVIISQWAYESEWGHSQSAKTDNNFFGITWFEGCPFPKGTARGVSGSEGGNYMKFPNKKSAFSYYGYMVASQSNFNACVGNKSPSECLLILGRGGYATAGITESSPYFTGCMSIIQSNNLTQYDDFAIQKWKDFGSNTSGSVGDGWGWPFPEVGQGSFAGGQLFGKNPGGEFRENGFHDGLDFGSVDHPGNEIHAIHGGTVTYVGNPGISGLGACVIVINDSGLNMVYQEFATSTSNAKVKVGDKVKLGDVIGIRDTEHLHLGITKKDWLQAESSAFTDDGTWLDPLKIITTGKY	ATGATGGGGATTCTGTTTCTTTTCTTTGGCGTCGATGATTCTGAGACAAGTGGATCGGCTACTGGCGGAGCAGAATTTATTGGTGTTTATTCAGAAGATTTACCTTCTTATCCTGAGATCAAAGGAGTTGGAAATGTGCCTGATGAAATCGCCCAATTAGCTGTAGGTTCAGCTATAAAATATCACTTGTTGCCAAGTGTGATTATTAGTCAGTGGGCGTATGAAAGTGAATGGGGGCATTCACAGTCTGCAAAGACTGATAATAATTTCTTTGGGATCACATGGTTTGAAGGCTGTCCGTTTCCTAAAGGTACCGCTCGAGGGGTAAGCGGTTCAGAAGGTGGAAATTATATGAAGTTTCCGAATAAAAAATCAGCCTTTAGTTATTATGGCTATATG…
GCF_002813755.1	NZ_CP0180621.354.AOI_01	63.3;Enterolysin_A	MDKQVENVIKQQIKRRMKRRLFLWLFGTSGGLFLLGLVLALVLFIAFAAGVPDQSGGTVGDVTFTGEYSEGLPMYDEIKGRGPFSDEIAQYAVGAAVKYKLLPSVILSQYGYESAFGTSLSAKNDLNYFGITWFDGCLFPKGTARGVGGIEGGWYMKFPTSQAAFSYYGFMVATQSNFNACVGNKSPGADLLILGRGGYAAAGITEDSAYYQGCMSIIESNHLTEYDEFAIKHWGEGNSSNGTITGEWTNPFPGTSLDQSSFSGGQLFGTNPGGEFRPNGFHDGLDFGSVDHPGSEIHAVHSGTVTYVGNPGISQLGACVIVINYDGLNMVYQEFTNNGSNARVKVGDQVKVGQVIAIRDTEHLHLGFTRMDWLEAQGHGYTNDGTWIDPLPLLNSSGG…	ATGGATAAGCAAGTGGAAAATGTGATCAAGCAACAAATCAAGCGTCGTATGAAGCGGCGCTTATTTTTGTGGCTTTTTGGGACGTCTGGAGGCTTGTTTTTATTAGGGCTTGTTCTAGCACTTGTACTATTTATAGCTTTTGCAGCAGGAGTTCCTGATCAGTCCGGAGGCACGGTTGGTGACGTTACATTTACGGGTGAATATTCTGAAGGACTCCCAATGTATGACGAAATCAAAGGACGTGGCCCTTTTTCAGACGAAATAGCGCAATACGCAGTTGGTGCAGCAGTAAAATACAAATTATTACCCAGTGTCATTCTTTCGCAGTACGGCTATGAGTCTGCTTTTGGAACGTCTTTATCTGCTAAGAATGATTTGAACTATTTTGGGATCACCTGG…
GCF_005158285.1	NZ_CP0290661.720.AOI_01	63.3;Enterolysin_A	MGIWRLPFDGVLKPYEEGQQFGQTSYPRGRGYFHDGYDFGSAKYSGNFKAVNDGTVIYAGYYGSGIGYAIVLQIADYQVMYQEFGSTYFVKVGDKVTAGQPLGTLTSTHLHLGITKKNWQTALSSWDIDDGTWLNPIPILTSGDSTDEGTKNNDKGMMKMFAYKLEGRPEVYGVWGNKVFHLTTQEMYNDFQNIVLDQTGKPCKTYSWKLPNNQSTVDLIGLMAEKANL	ATGGGGATTTGGCGTCTTCCGTTTGATGGCGTATTAAAACCGTATGAAGAAGGACAGCAATTTGGTCAAACTTCTTATCCCCGTGGGCGAGGATATTTCCACGATGGTTATGACTTCGGTTCGGCAAAGTACTCCGGTAATTTTAAAGCAGTAAATGACGGGACAGTTATTTATGCGGGATATTATGGTTCAGGGATAGGATATGCAATCGTATTACAAATCGCTGATTACCAAGTAATGTACCAAGAGTTTGGCAGTACTTATTTTGTAAAAGTTGGGGATAAAGTAACTGCAGGACAGCCTTTAGGAACATTGACTAGTACTCACCTACATTTAGGTATTACGAAAAAGAACTGGCAAACTGCTCTTTCAAGCTGGGATATCGATGATGGAACATGG…
GCF_020149485.1	NZ_CP0836991.1562.AOI_01	155.2;Mundticin_ATO6	LKKLTAKEMSQVVGGKYYGNGVSCNKKGCSVDWGKAIGIIGNNSAANLATGGAAGWKS	TTGAAGAAATTAACAGCAAAAGAAATGTCACAAGTAGTAGGTGGAAAATACTACGGTAATGGAGTCTCATGTAATAAAAAAGGGTGCAGTGTTGATTGGGGAAAAGCTATTGGCATTATTGGAAATAATTCTGCTGCGAATTTAGCTACTGGTGGAGCAGCTGGTTGGAAAAGT
GCF_900114755.1	NZ_FOUC010000111.2409.AOI_01	119.2;Lactococcin_972_(Lcn972)	LATGGIAASAATEYPDGGTWNYGVGITGSYSDYFHGTKRHSATVKKGSDESYQAQGAGVWAKARLGAYSGCNFYYNYW	TTGGCTACTGGTGGTATCGCTGCCTCAGCAGCAACGGAATACCCTGATGGTGGTACATGGAATTATGGTGTCGGTATCACAGGTTCATATTCTGATTATTTCCACGGTACTAAACGCCACAGCGCTACTGTAAAAAAAGGTTCAGACGAATCTTATCAAGCTCAAGGGGCTGGCGTGTGGGCTAAGGCTCGTCTTGGCGCATATTCAGGATGTAATTTCTATTATAATTATTGG
GCF_900114755.1	NZ_FOUC010000321.2399.AOI_01	155.2;Mundticin_ATO6	LKKLTAKEMSQVVGGKYYGNGVSCNKKGCSVDWGKAIGIIGNNSAANLATGGAAGWKS	TTGAAGAAATTAACAGCAAAAGAAATGTCACAAGTAGTAGGTGGAAAATACTACGGTAATGGAGTCTCATGTAATAAAAAAGGGTGCAGTGTTGATTGGGGAAAAGCTATTGGCATTATTGGAAATAATTCTGCTGCGAATTTAGCTACTGGTGGAGCAGCTGGTTGGAAAAGT
GCF_009906575.1	NZ_JAAAJW0100000011.1260.AOI_01	119.2;Lactococcin_972_(Lcn972)	LATGGIAASAATEYPDGGTWNYGVGITGSYSDYFHGTKRHSATVKKGSDESYQAQGAGVWAKARLGAYSGCNFYYKYW	TTGGCTACTGGTGGTATCGCTGCCTCAGCAGCAACGGAATACCCTGATGGTGGTACATGGAATTATGGTGTCGGTATCACAGGTTCATATTCTGATTATTTCCATGGTACTAAACGCCACAGCGCTACTGTAAAAAAAGGTTCAGACGAATCTTATCAAGCTCAAGGGGCTGGCGTGTGGGCTAAGGCTCGTCTTGGCGCATATTCAGGATGTAATTTCTATTATAAGTATTGG
GCF_009906575.1	NZ_JAAAJW0100000131.1275.AOI_01	63.3;Enterolysin_A	MESQNESLIKQYVKRRTKRRLFLWLFGTSAGLLTLLITVFVTLFLILAAGSIDNSDSGSSSGGEAFTGEYSEGLPIYKEIKGKGPFSDEIAQYAVGAAVKYKLLPSVILSQYGYESAFGTSLSAKNDLNFFGITWFDGCLFPKGTARGVGGIEGGWYMKFPNSKAAFSYYGFMVATQSNFNACVGNKSPGASLLILGRGGYAAAGITEDSAYYKNCMSIINSNQLTEYDEFAIKHWGEGGNNNGPITGEWTNPFPGSSLDKSSFSGGQLFGTNPGGEFRPNGFHDGLDFGSVDHPGSEIHAVHGGKVVYVGNPGISGLGACVIVINYDGLNMVYQEFANSTGNSRVKVGDQVKVGQVIATRDTEHLHLGFTRMDWRQAQGHAFIDDGTWIDPLPFLNSS…	ATGGAAAGCCAAAATGAAAGTTTAATCAAGCAGTATGTTAAGCGTCGTACAAAGCGACGCTTATTTTTGTGGTTGTTTGGTACTTCTGCAGGTTTGCTTACCCTCTTGATCACTGTGTTTGTGACGCTTTTTCTAATCCTTGCGGCGGGGTCGATTGATAACTCTGATTCAGGTTCAAGTAGTGGTGGTGAAGCTTTTACAGGAGAATACTCAGAAGGCTTACCCATCTATAAAGAAATCAAAGGGAAAGGTCCTTTTTCTGATGAGATTGCGCAATATGCCGTAGGAGCAGCCGTGAAATATAAATTATTACCAAGTGTGATTCTCTCGCAATATGGGTATGAATCAGCGTTTGGCACGTCATTATCTGCTAAAAACGACTTGAATTTTTTTGGGATC…
GCF_009906575.1	NZ_JAAAJW0100000251.1247.AOI_01	63.3;Enterolysin_A	MGIWRLPFDGVLKPYEEGQQFGQTSYPRGRGYFHDGYDFGSAKYSGNFKAVNDGTVIYAGYYGSGIGYAIVLQIDDYQVMYQEFGSTYFVKVGEKVTAGQPLGTLTSTHLHLGITKKNWQTALSSWDIDDGTWLNPIPILTSGDSTDEGSKNNDKGMMKMFAYKLEGRPEVYGVWGNKVFHLTTQEMYNDFQNIVLDQTGKPCKTYSWKLPNNQSTVDLIGLMAEKANL	ATGGGGATTTGGCGTCTTCCGTTTGATGGCGTATTAAAACCGTATGAAGAAGGACAGCAATTTGGTCAAACTTCTTATCCCCGTGGACGAGGATATTTCCACGACGGTTATGACTTCGGTTCGGCAAAGTACTCCGGTAATTTTAAAGCAGTAAATGATGGGACAGTTATTTATGCGGGTTATTATGGTTCAGGGATAGGATATGCAATCGTATTACAAATCGATGATTACCAAGTAATGTACCAAGAGTTTGGCAGTACTTATTTTGTAAAAGTTGGTGAAAAAGTAACTGCAGGACAGCCTTTAGGAACATTGACTAGTACTCACCTACATTTAGGCATTACGAAAAAGAATTGGCAAACTGCTCTTTCAAGCTGGGATATCGATGATGGAACATGG…
GCF_009906575.1	NZ_JAAAJW0100000511.1237.AOI_01	155.2;Mundticin_ATO6	LKKLTAKEMSQVVGGKYYGNGVSCNKKGCSVDWGKAIGIIGNNSAANLATGGAAGWKS	TTGAAGAAATTAACAGCAAAAGAAATGTCACAAGTAGTAGGTGGAAAATACTACGGTAATGGAGTCTCATGTAATAAAAAAGGGTGCAGTGTTGATTGGGGAAAAGCGATTGGCATTATTGGAAATAATTCTGCTGCGAATTTAGCTACTGGTGGAGCAGCTGGTTGGAAAAGT
GCF_012935515.1	NZ_JABCAG0100000191.1354.AOI_01	63.3;Enterolysin_A	MESQNESLIKQYVKRRTKRRLFLWLFGTSAGLLTLLITVFVTLFLILAAGSIDNSDSGSSSGGEAFTGEYSEGLPIYKEIKGKGPFSDEIAQYAVGAAVKYKLLPSVILSQYGYESAFGTSLSAKNDLNFFGITWFDGCLFPKGTARGVGGIEGGWYMKFPNSKAAFSYYGFMVATQSNFNACVGNKSPGASLLILGRGGYAAAGITEDSAYYKNCMSIINSNQLTEYDAFAIKHWGEGGNNNGPITGEWTNPFPGSSLDKSSFSGGQLFGTNPGGEFRPNGFHDGLDFGSVDHPGSEIHAVHGGKVVYVGNPGISGLGACVIVINYDGLNMVYQEFANSTGNSRVKVGDQVKVGQVIAIRDTEHLHLGFTRMDWRQAQGHAFIDDGTWIDPLPFLNSS…	ATGGAAAGCCAAAATGAAAGTTTAATCAAGCAGTATGTTAAGCGTCGTACAAAGCGACGCTTATTTTTGTGGTTGTTTGGTACTTCTGCAGGTTTGCTTACCCTCTTGATCACTGTGTTTGTGACGCTTTTTCTAATACTGGCAGCGGGGTCGATTGATAACTCTGATTCAGGTTCAAGTAGTGGTGGTGAAGCTTTTACAGGAGAATACTCAGAAGGTTTACCCATCTATAAAGAAATCAAAGGGAAAGGTCCTTTTTCTGATGAGATTGCGCAATATGCCGTAGGAGCAGCCGTGAAATATAAATTATTACCAAGTGTGATTCTTTCGCAATACGGATATGAATCAGCGTTTGGCACGTCATTATCTGCTAAAAACGACTTGAATTTTTTTGGGATC…
GCF_012935515.1	NZ_JABCAG0100000351.1329.AOI_01	225.2;UviB	MEKLIESLLSNPEQISFAVLFVGLFIWVMQQNNAREKRYQNTIDKLTDALGDVEAIKSTVEKIHEKLH	ATGGAAAAATTAATCGAGTCGTTACTCTCAAACCCCGAACAGATCAGCTTTGCTGTTTTATTTGTAGGGTTGTTTATCTGGGTGATGCAGCAGAACAATGCCCGAGAAAAAAGGTATCAAAATACAATCGACAAGCTGACCGATGCGCTTGGTGATGTAGAAGCAATAAAAAGTACTGTGGAGAAGATTCACGAAAAATTACAT
GCF_012935515.1	NZ_JABCAG0100000841.1359.AOI_01	155.2;Mundticin_ATO6	LKKLTAKEMSQVVGGKYYGNGVSCNKKGCSVDWGKAIGIIGNNSAANLATGGAAGWKS	TTGAAGAAATTAACAGCAAAAGAAATGTCACAAGTAGTAGGTGGAAAATACTACGGTAATGGAGTCTCATGTAATAAAAAAGGGTGCAGTGTTGATTGGGGAAAAGCTATTGGCATTATTGGAAATAATTCTGCTGCGAATTTAGCTACTGGTGGAGCAGCTGGTTGGAAAAGT
GCF_015550885.1	NZ_JADNBP0100000061.1456.AOI_01	119.2;Lactococcin_972_(Lcn972)	MKKIVVCTLSLIVLATGGIAASAATEYPDGGTWNYGVGITGSYSDYFHGTKRHSATVKKGSDESYQAQGAGVWAKARLGAYSGCNFYYNYW	ATGAAAAAAATAGTTGTTTGTACATTATCTTTAATTGTCTTGGCTACTGGTGGTATCGCTGCCTCTGCTGCAACGGAATACCCTGATGGTGGTACATGGAATTATGGTGTCGGTATCACAGGTTCATATTCTGATTATTTCCATGGTACTAAACGCCACAGCGCTACTGTAAAAAAAGGTTCAGACGAATCTTATCAAGCTCAAGGGGCTGGCGTGTGGGCTAAGGCTCGTCTTGGCGCATATTCAGGATGTAATTTCTATTATAATTATTGG
GCF_015551665.1	NZ_JADNDD0100000061.1487.AOI_01	155.2;Mundticin_ATO6	LKKLTAKEMSQVVGGKYYGNGVSCNKKGCSVDWGKAIGIIGNNSAANLATGGAAGWKS	TTGAAGAAATTAACAGCAAAAGAAATGTCACAAGTAGTAGGTGGAAAATACTACGGTAATGGAGTCTCATGTAATAAAAAAGGGTGCAGTGTTGATTGGGGAAAAGCTATTGGCATTATTGGAAATAATTCTGCTGCGAATTTAGCTACTGGTGGAGCAGCTGGTTGGAAAAGT
GCF_015555705.1	NZ_JADNKX0100000201.1528.AOI_01	63.3;Enterolysin_A	MENQNESLIKQYVKRRAKRRLFLWVFGTSAGLITILITVFVTLFLILAAGSIDNSDSSSGGEAFTGEYSEGLPIYKEIKGRGPFSDEIAQYAVGAAVKYKLLPSVILSQYGYESAFGTSASARNDLNYFGITWFDGCLFPKGTARGIGGIEGGWYMKFPNSKAAFSYYGFMVATQSNFNACVGNKSPGASLLILGRGGYAAAGITEDSAYYKNCMSIINTNKLMEYDEFAIKHWREGGGTGGTITGSWGNPFPGSSLDKNSFSGGQLFGKNPGGEFRPNGFHDGLDFGSVDHPGSEIHAVHGGKVVYVGNPGISGLGACVIVINYDGLNMVYQEFANSTGNSRVKVGDQVKVGQVIGIRDTAHLHLGFTRMDWRQAQGHAFIDDGTWIDPLPFLNSSKK	ATGGAAAACCAAAATGAAAGTTTAATCAAACAGTATGTTAAGCGTCGTGCAAAGCGGCGCTTATTTTTGTGGGTGTTTGGTACTTCTGCAGGTTTGATTACTATATTGATCACTGTGTTTGTGACCCTTTTTCTAATACTTGCGGCAGGTTCTATTGATAATTCTGATTCAAGTAGTGGTGGCGAAGCTTTTACAGGAGAATATTCGGAAGGCTTACCCATTTATAAAGAAATCAAAGGAAGAGGCCCTTTTTCTGATGAGATTGCGCAATATGCTGTAGGTGCAGCAGTGAAGTATAAATTATTACCAAGTGTGATCCTTTCGCAATACGGTTATGAATCAGCGTTTGGTACGTCGGCGTCCGCAAGAAATGATCTCAATTATTTTGGGATTACGTGG…
GCF_015555705.1	NZ_JADNKX0100000221.1491.AOI_01	155.2;Mundticin_ATO6	LKKLTAKEMSQVVGGKYYGNGVSCNKKGCSVDWGKAIGIIGNNSAANLATGGAAGWKS	TTGAAGAAATTAACAGCAAAAGAAATGTCACAAGTAGTAGGTGGAAAATACTACGGTAATGGAGTCTCATGTAATAAAAAAGGGTGCAGTGTTGATTGGGGAAAAGCTATTGGCATTATTGGAAATAATTCTGCTGCGAATTTAGCTACTGGTGGAGCAGCTGGTTGGAAAAGT
GCF_020406015.1	NZ_JAIZFT0100000131.1584.AOI_01	155.2;Mundticin_ATO6	LKKLTAKEMSQVVGGKYYGNGVSCNKKGCSVDWGKAIGIIGNNSAANLATGGAAGWKS	TTGAAGAAATTAACAGCAAAAGAAATGTCACAAGTAGTAGGTGGAAAATACTACGGTAATGGAGTCTCATGTAATAAAAAAGGGTGCAGTGTTGATTGGGGAAAAGCTATTGGCATTATTGGAAATAATTCTGCTGCGAATTTAGCTACTGGTGGAGCAGCTGGTTGGAAAAGT
GCF_028317585.1	NZ_JAQLKI0100000061.1626.AOI_01	155.2;Mundticin_ATO6	LKKLTAKEMSQVVGGKYYGNGVSCNKKGCSVDWGKAIGIIGNNSAANLATGGAAGWKS	TTGAAGAAATTAACAGCAAAAGAAATGTCACAAGTAGTAGGTGGAAAATACTACGGTAATGGAGTCTCATGTAATAAAAAAGGGTGCAGTGTTGATTGGGGAAAAGCTATTGGCATTATTGGAAATAATTCTGCTGCGAATTTAGCTACTGGTGGAGCAGCTGGTTGGAAAAGT
GCF_028317595.1	NZ_JAQLKJ0100000201.1693.AOI_01	63.3;Enterolysin_A	LKRMGIWRLPFDGVLKPYEEGQQFGQTSYPRGRGYFHDGYDFGSAKYSGNFRAVNDGTVIYAGYYGSGIGYAIVLQIADYQVMYQEFGSTYFVKVGDKVTAGQPLGTLTSTHLHLGITKKNWQTALSSWDIDDGTWLNPIPILTSGDSTDEGTKNNDKGMMKMFAYKLEGRPEVYGVWGNKVFHLTSQEMYNDFQNIVLDQTGKPCKTYSWKLPNNQSTVDLIGLMAEKANL	TTGAAAAGAATGGGGATTTGGCGTCTTCCATTTGATGGCGTATTAAAACCGTATGAAGAAGGACAGCAATTTGGTCAAACTTCTTATCCCCGTGGACGAGGATATTTCCACGATGGTTATGACTTCGGTTCGGCAAAGTACTCCGGTAATTTTAGAGCAGTAAATGATGGGACAGTTATTTATGCGGGTTATTATGGTTCAGGGATAGGATATGCAATCGTATTACAAATCGCTGATTACCAAGTAATGTACCAAGAGTTTGGCAGTACTTATTTTGTAAAAGTTGGTGACAAAGTAACTGCAGGACAGCCTTTAGGAACATTGACTAGTACTCACTTACATTTAGGCATTACGAAAAAAAATTGGCAAACTGCTCTTTCGAGTTGGGATATTGATGAT…
GCF_028317595.1	NZ_JAQLKJ0100000271.1762.AOI_01	63.3;Enterolysin_A	MDKQVENVIKQQIKRRMKRRLFLWLFGTSGGLFLLGLVLALVLFIAFAAGVPDQSGGTVGDVTFTGEYSEGLPMYDEIKGRGPFSDEIAQYAVGAAVKYKLLPSVILSQYGYESAFGTSLSAKNDLNYFGITWFDGCLFPKGTARGVGGIEGGWYMKFPTSQAAFSYYGFMVATQSNFNACVGNKSPGADLLILGRGGYAAAGITEDSAYYQGCMSIIESNHLTEYDEFAIKHWGEGNSSNGTITGEWTNPFPGTSLDQSSFSGGQLFGTNPGGEFRPNGFHDGLDFGSVDHPGSEIHAVHSGTVTYVGNPGISQLGACVIVINYDGLNMVYQEFTNNGSNARVKVGDQVKVGQVIAIRDTEHLHLGFTRMDWLEAQGHGYTNDGTWIDPLPLLNSSGG…	ATGGATAAGCAAGTAGAAAATGTGATCAAGCAACAAATCAAGCGTCGTATGAAGCGGCGCTTATTTTTGTGGCTTTTTGGGACGTCTGGAGGCTTGTTTTTATTAGGGCTTGTTCTAGCACTTGTACTATTTATAGCTTTTGCAGCAGGAGTTCCTGATCAGTCCGGAGGCACGGTTGGTGACGTGACATTTACGGGTGAATATTCTGAAGGACTCCCTATGTATGACGAAATCAAAGGACGTGGTCCTTTTTCAGACGAAATAGCACAATACGCAGTTGGTGCAGCAGTAAAATACAAATTATTACCCAGTGTCATTCTTTCGCAGTACGGCTATGAGTCTGCTTTTGGAACGTCTTTATCTGCTAAGAATGATTTGAACTATTTTGGGATCACCTGG…
GCF_033141225.1	NZ_JAQRDH0100000091.1832.AOI_01	155.2;Mundticin_ATO6	LKKLTAKEMSQVVGGKYYGNGVSCNKKGCSVDWGKAIGIIGNNSAANLATGGAAGWKS	TTGAAGAAATTAACAGCAAAAGAAATGTCACAAGTAGTAGGTGGAAAATACTACGGTAATGGAGTCTCATGTAATAAAAAAGGGTGCAGTGTTGATTGGGGAAAAGCTATTGGCATTATTGGAAATAATTCTGCTGCGAATTTAGCTACTGGTGGAGCAGCTGGTTGGAAAAGT
GCF_037002805.1	NZ_JBAMKJ0100000061.1867.AOI_01	155.2;Mundticin_ATO6	LKKLTAKEMSQVVGGKYYGNGVSCNKKGCSVDWGKAIGIIGNNSAANLATGGAAGWKS	TTGAAGAAATTAACAGCAAAAGAAATGTCACAAGTAGTAGGTGGAAAATACTACGGTAATGGAGTCTCATGTAATAAAAAAGGGTGCAGTGTTGATTGGGGAAAAGCTATTGGCATTATTGGAAATAATTCTGCTGCGAATTTAGCTACTGGTGGAGCAGCTGGTTGGAAAAGT
GCF_039837675.1	NZ_JBDPBR0100000011.2273.AOI_01	63.3;Enterolysin_A	LKRMGIWRLPFDGVLKPYEEGQQFGQTSYPRGRGYFHDGYDFGSAKYSGNFRAVNDGTVIYAGYYGSGIGYAIVLQIADYQVMYQEFGSTYFVKVGDKVTAGQPLGTLTSTHLHLGITKKNWQTALSSWDIDDGTWLNPIPILTSGDSTDEGTKNNDKGMMKMFAYKLEGRPEVYGVWGNKVFHLTSQEMYNDFQNIVLDQTGKPCKTYSWKLPNNQSTVDLIGLMAEKANL	TTGAAAAGAATGGGGATTTGGCGTCTTCCATTTGATGGCGTATTAAAACCGTATGAAGAAGGACAGCAATTTGGTCAAACTTCTTATCCCCGTGGACGAGGATATTTCCACGATGGTTATGACTTCGGTTCGGCAAAGTACTCCGGTAATTTTAGAGCAGTAAATGATGGGACAGTTATTTATGCGGGTTATTATGGTTCAGGGATAGGATATGCAATCGTATTACAAATCGCTGATTACCAAGTAATGTACCAAGAGTTTGGCAGTACTTATTTTGTAAAAGTTGGTGACAAAGTAACTGCAGGACAGCCTTTAGGAACATTGACTAGTACTCACTTACATTTAGGCATTACGAAAAAAAATTGGCAAACTGCTCTTTCGAGTTGGGATATTGATGAT…
GCF_039837675.1	NZ_JBDPBR0100001351.2100.AOI_01	63.3;Enterolysin_A	MAVPRSRTRSFAGGQLFGKNPGGEFRENGFHNGLEFGSVDHHGNEIHAIHGGTVTYVGNPGISGLGACVIVINGSGLNMVYQEFATSTSNAKVKVGDKVKLGDVIGIRDTEHLHLGITKKDWLQAESSAFTDDGTWLDPLKIITTGKY	ATGGCCGTTCCCAGAAGTCGGACAAGGTCTTTTGCAGGTGGTCAATTATTTGGTAAAAATCCTGGTGGGGAATTTCGAGAAAATGGTTTTCACAACGGATTGGAGTTTGGATCGGTAGATCACCATGGAAATGAAATTCACGCCATTCATGGTGGAACGGTCACTTATGTTGGAAATCCTGGTATTTCGGGGTTAGGTGCTTGTGTGATCGTCATTAATGGTAGTGGATTAAATATGGTTTATCAAGAGTTCGCCACAAGTACCAGCAATGCAAAGGTTAAAGTAGGTGATAAGGTCAAATTGGGAGACGTAATTGGCATACGTGATACAGAACACTTGCACTTAGGAATCACGAAAAAAGATTGGTTACAAGCGGAATCAAGTGCGTTCACAGATGAT…
GCF_039837675.1	NZ_JBDPBR0100001781.2050.AOI_01	63.3;Enterolysin_A	MDKQVENVIKQQIKRRMKRRLFLWLFGTSGGLFLLGLVLALVLFIAFAAGVPDQSGGTVGDVTFTGEYSEGLPMYDEIKGRGPFSDEIAQYAVGAAVKYKLLPSVILSQYGYESAFGTSLSAKNDLNYFGITWFDGCLFPKGTARGVGGIEGGWYMKFPTSQAAFSYYGFMVATQSNFNACVGNKSPGADLLILGRGGYAAAGITEDSAYYQGCMSIIESNHLTEYDEFAIKHWGEGNSSNGTITGEWTNPFPGTSLDQSSFSGGQLFGTNPGGEFRPNGFHDGLDFGSVDHPGSEIHAVHSGTVTYVGNPGISQLGACVIVINYDGLNMVYQEFTNNGSNARVKVGDQVKVGQVIAIRDTEHLHLGFTRMDWLEAQGHGYTNDGTWIDPLPLLNSSGG…	ATGGATAAGCAAGTAGAAAATGTGATCAAGCAACAAATCAAGCGTCGTATGAAGCGGCGCTTATTTTTGTGGCTTTTTGGGACGTCTGGAGGCTTGTTTTTATTAGGGCTTGTTCTAGCACTTGTACTATTTATAGCTTTTGCAGCAGGAGTTCCTGATCAGTCCGGAGGCACGGTTGGTGACGTGACATTTACGGGTGAATATTCTGAAGGACTCCCTATGTATGACGAAATCAAAGGACGTGGTCCTTTTTCAGACGAAATAGCACAATACGCAGTTGGTGCAGCAGTAAAATACAAATTATTACCCAGTGTCATTCTTTCGCAGTACGGCTATGAGTCTGCTTTTGGAACGTCTTTATCTGCTAAGAATGATTTGAACTATTTTGGGATCACCTGG…
GCF_040150775.1	NZ_JBDXRY0100000061.2306.AOI_01	225.2;UviB	MEKLIESLLSNPEQISFAVLFVGLFIWVMQQNNAREKRYQNTIDKLTDALGDVEAIKSTVEKIHEKLH	ATGGAAAAATTAATAGAGTCGTTACTATCAAACCCCGAACAGATCAGCTTTGCTGTTTTATTTGTAGGATTGTTTATCTGGGTGATGCAGCAGAACAACGCCCGAGAAAAAAGGTATCAAAATACAATCGACAAGTTGACCGATGCGCTTGGTGATGTAGAAGCAATAAAAAGTACCGTGGAGAAGATTCACGAAAAATTACAT
GCF_040150775.1	NZ_JBDXRY0100000151.2303.AOI_01	63.3;Enterolysin_A	MDKQVENVIKQQIKRRMKRRLFLWLFGTSGGLFLLGLVLALVLFIAFAAGVPDQSGGTVGDVTFTGEYSEGLPMYDEIKGRGPFSDEIAQYAVGAAVKYKLLPSVILSQYGYESAFGTSLSAKNDLNYFGITWFDGCLFPKGTARGVGGIEGGWYMKFPTSQAAFSYYGFMVATQSNFNACVGNKSPGADLLILGRGGYAAAGITEDSAYYQGCMSIIESNHLTEYDEFAIKHWGEGNTSNGTITGEWTNPFPGTSLDQSSFSGGQLFGTNPGGEFRPNGFHDGLDFGSVDHPGSEIHAVHSGTVTYVGNPGISQLGACVIVINYDGLNMVYQEFTNNGSNARVKVGDQVKVGQVIAIRDTEHLHLGFTRMDWLEAQGHGYTNDGTWIDPLPLLNSSGG…	ATGGATAAGCAAGTAGAAAATGTGATCAAGCAACAAATCAAGCGTCGTATGAAGCGGCGCTTATTTTTGTGGCTTTTTGGGACGTCTGGAGGCTTGTTTTTATTAGGGCTTGTTCTAGCACTTGTACTATTTATAGCTTTTGCAGCAGGAGTTCCTGATCAGTCCGGAGGCACGGTTGGTGACGTGACATTTACGGGTGAATATTCTGAAGGACTCCCTATGTATGACGAAATCAAAGGACGTGGTCCTTTTTCAGACGAAATAGCACAATACGCAGTTGGTGCAGCAGTAAAATACAAATTATTACCCAGTGTCATTCTTTCGCAGTACGGCTATGAGTCTGCTTTTGGAACGTCTTTATCTGCTAAGAATGATTTGAACTATTTTGGGATCACCTGG…
GCF_040430785.1	NZ_JBEUIS0100000211.2350.AOI_01	155.2;Mundticin_ATO6	LKKLTAKEMSQVVGGKYYGNGVSCNKKGCSVDWGKAIGIIGNNSAANLATGGAAGWKS	TTGAAGAAATTAACAGCAAAAGAAATGTCACAAGTAGTAGGTGGAAAATACTACGGTAATGGAGTCTCATGTAATAAAAAAGGGTGCAGTGTTGATTGGGGAAAAGCTATTGGCATTATTGGAAATAATTCTGCTGCGAATTTAGCTACTGGTGGAGCAGCTGGTTGGAAAAGT
GCF_001886035.1	NZ_JXKV010000071.218.AOI_01	119.2;Lactococcin_972_(Lcn972)	LATGGIAASAATEYPDGGTWNYGVGITGSYSDYFHGTKRHSATVKKGSDESYQAQGAGVWAKARLGAYSGCNFYYNYW	TTGGCTACTGGTGGTATCGCTGCCTCAGCAGCAACGGAATACCCTGATGGTGGTACATGGAATTATGGTGTCGGTATCACAGGTTCATATTCTGATTATTTCCATGGTACTAAACGCCACAGCGCTACTGTAAAAAAAGGTTCAGACGAATCTTATCAAGCTCAAGGGGCTGGAGTGTGGGCTAAGGCTCGTCTTGGCGCATATTCAGGATGTAATTTCTATTATAATTATTGG
GCF_001886035.1	NZ_JXKV010000191.212.AOI_01	63.3;Enterolysin_A	MDKQVENVIKQQIKRRMKRRLFLWLFGTSGGLFLLGLVLALVLFIAFAAGVPDQSGGTVGDVTFTGEYSEGLPMYDEIKGRGPFSDEIAQYAVGAAVKYKLLPSVILSQYGYESAFGTSLSAKNDLNYFGITWFDGCLFPKGTARGVGGIEGGWYMKFPTSQAAFSYYGFMVATQSNFNACVGNKSPGADLLILGRGGYAAAGITEDSAYYQGCMSIIESNHLTEYDEFAIKHWGEGNSSNGTITGEWTNPFPGTSLDQSSFSGGQLFGTNPGGEFRPNGFHDGLDFGSVDHPGSEIHAVHSGTVTYVGNPGISQLGACVIVINYDGLNMVYQEFTNNGSNARVKVGDQVKVGQVIAIRDTEHLHLGFTRMDWLEAQGHGYTNDGTWIDPLPLLNSSGG…	ATGGATAAGCAAGTGGAAAATGTGATCAAGCAACAAATCAAGCGTCGTATGAAGCGGCGCTTATTTTTGTGGCTTTTTGGGACGTCTGGAGGCTTGTTTTTATTAGGGCTTGTTCTAGCACTTGTACTATTTATAGCTTTTGCAGCAGGAGTTCCTGATCAGTCCGGAGGCACGGTTGGTGACGTTACATTTACGGGTGAATATTCTGAAGGACTCCCAATGTATGACGAAATCAAAGGACGTGGCCCTTTTTCAGACGAAATAGCGCAATACGCAGTTGGTGCAGCAGTAAAATACAAATTATTACCCAGTGTCATTCTTTCGCAGTACGGCTATGAGTCTGCTTTTGGAACGTCTTTATCTGCTAAGAATGATTTGAACTATTTTGGGATCACCTGG…
GCF_001675535.1	NZ_LSMC010001491.22.AOI_01	119.2;Lactococcin_972_(Lcn972)	LATGGIAASAATEYPDGGTWNYGVGITGSYSDYFHGTKRHSATVKKGSDESYQAQGAGVWAKARLGAYSGCNFYYNYW	TTGGCTACTGGTGGTATCGCTGCCTCAGCAGCAACGGAATACCCTGATGGTGGTACATGGAATTATGGTGTCGGTATCACAGGTTCATATTCTGATTATTTCCATGGTACTAAACGCCACAGCGCTACTGTAAAAAAAGGTTCAGACGAATCTTATCAAGCTCAAGGGGCTGGCGTGTGGGCTAAGGCTCGTCTTGGCGCATATTCAGGATGTAATTTCTATTATAATTATTGG
GCF_001705215.1	NZ_MCRG010000061.172.AOI_01	225.2;UviB	MEKLIESLLSNPEQISFAVLFVGLLIWVMQQNNAREKRYQNTIDKLTDALGDVEAIKSTVEKIHEKLH	ATGGAAAAATTAATCGAATCGTTACTCTCAAACCCCGAACAGATCAGCTTTGCTGTTTTATTTGTAGGGTTACTTATCTGGGTGATGCAGCAGAACAACGCCCGAGAAAAAAGGTATCAAAATACAATCGACAAGTTGACCGATGCGCTTGGTGATGTAGAAGCAATAAAAAGTACCGTGGAGAAGATTCACGAAAAATTACAT
GCF_001705215.1	NZ_MCRG010000271.205.AOI_01	155.2;Mundticin_ATO6	LKKLTAKEMSQVVGGKYYGNGVSCNKKGCSVDWGKAIGIIGNNSAANLATGGAAGWKS	TTGAAGAAATTAACAGCAAAAGAAATGTCACAAGTAGTAGGTGGAAAATACTACGGTAATGGAGTCTCATGTAATAAAAAAGGGTGCAGTGTTGATTGGGGAAAAGCTATTGGCATTATTGGAAATAATTCTGCTGCGAATTTAGCTACTGGTGGAGCAGCTGGTTGGAAAAGT
GCF_001990645.1	NZ_MSTR010000071.279.AOI_01	93.3;Zoocin_A	MKKMSKLFCVATLLATPSATQMNKVFASEQDKATIDSSFIEESTIDSTTSTSDSSSQINEEIGTTESTVGDATISSTETTESTDDNKTDVTESSQQLEESTENTQEEQSSTNMGATPHPSGSINIPKPDFHRPTPPTIRQPDLSQFTTEPIYPENVNDSRRQETSKQTSAKSESIELFIKKIGEDARKIAQENDLYASVILAQAILESGAGSSILSQAPYYNLFGIKGAFNEQGVYLATQEDNGYGQQSVTLAQFRKYSGYEESFQDYAKLMKNGLIGNPTFYQGTWKSKTTSYHDATKALTGTYATDIYYGDKLDQLIETYELTEYDEAKEVIVSETNYCMPLDSYTVTSEFGIRGSEFHRGIDLAAPMGTPIKAAKAGKVIMADTHYSWGNYVVIQH…	ATGAAAAAAATGTCAAAACTTTTTTGTGTGGCTACGTTATTAGCTACGCCGTCCGCAACACAAATGAATAAAGTTTTTGCATCTGAACAGGATAAGGCAACGATTGATTCATCTTTTATTGAAGAAAGTACGATAGATTCAACCACAAGTACAAGTGATTCAAGTAGTCAAATAAATGAAGAAATAGGCACAACAGAAAGTACAGTGGGAGACGCAACGATTAGTTCGACAGAGACAACCGAAAGCACGGATGATAATAAAACAGACGTGACTGAGTCAAGCCAACAACTGGAAGAATCAACCGAAAATACGCAAGAAGAACAAAGTAGTACGAATATGGGAGCAACTCCCCATCCTTCTGGAAGTATAAACATTCCAAAACCAGACTTCCATAGGCCA…
GCF_001990645.1	NZ_MSTR010000121.272.AOI_01	63.3;Enterolysin_A	MANQNDNLIKQYVKRRAKRRLFLWLFGTSAGLISILVTVFVTLFLILAAGSIDNSDSGSSSGDEAFTGEYSEGLPIYKEIKGKGPFSDEIAQYAVGAAVKYKLLPSVILSQYGYESAFGTSLSAKNDLNFFGITWFDGCLFPKGTARGVGGIEGGWYMKFPNSKAAFSYYGFMVATQSNFNACVGNKSPGASLLILGRGGYAAAGITEDSAYYKNCMSIINSNKLTEYDEFAIKHWGEGGNNNGPITGEWTNPFPGSSLDKSSFSGGQLFGTNPGGEFRPNGFHDGLDFGSVDHPGSEIHAVHGGKVVYVGNPGISGLGACVIVINYDGLNMVYQEFANSTGNSRVKVGDQVKVGQVIAIRDTEHLHLEFTRMDWRQAQGHAFIDDGTWIDPLPFLNSS…	ATGGCTAATCAAAATGACAATTTAATCAAGCAATATGTTAAGCGTCGTGCGAAACGGCGCTTATTTTTGTGGTTATTTGGTACTTCTGCTGGTTTGATTAGCATATTGGTCACTGTATTTGTGACTCTTTTTCTAATACTTGCGGCGGGTTCTATTGATAATTCAGATTCAGGATCAAGTAGTGGTGACGAAGCTTTTACAGGAGAATATTCGGAAGGATTACCAATCTATAAGGAAATCAAAGGTAAAGGTCCTTTTTCTGATGAGATTGCGCAATATGCCGTAGGAGCAGCAGTGAAATATAAATTATTACCAAGTGTAATTCTTTCCCAATACGGGTATGAGTCGGCGTTTGGGACGTCATTATCTGCTAAAAACGACTTGAATTTTTTCGGGATC…
GCF_002141315.1	NZ_NGMS010000011.297.AOI_01	63.3;Enterolysin_A	MGIWRLPFDGVLKPYEEGQQFGQTSYPRGRGYFHDGYDFGSAKYSGNFKAVNDGTVIYAGYYGSGIGYAIVLQIADYQVMYQEFGSTYFVKVGDKVTAGQPLGTLTSTHLHLGITKKNWQTALSSWDIDDGTWLNPIPILTSGESTDEGSKNNDKGMMKMFAYKLEGRPEVYGVWGNKVFHLTSQEMYNDFQNIVLDQTGKPCKTYSWKLPNNQSTVDLIGLMAEKANL	ATGGGGATTTGGCGTCTTCCATTTGATGGCGTATTAAAACCGTATGAAGAAGGACAGCAATTTGGTCAAACTTCTTATCCCCGTGGACGAGGATATTTCCACGACGGTTATGACTTCGGTTCGGCAAAGTACTCCGGTAATTTTAAAGCAGTAAATGATGGGACAGTTATTTATGCGGGTTATTATGGTTCAGGGATAGGATATGCAATCGTATTACAAATCGCTGATTACCAAGTAATGTACCAAGAGTTTGGCAGTACTTATTTTGTAAAAGTTGGTGACAAAGTAACTGCAGGACAGCCTTTAGGAACATTGACTAGTACTCACTTACATTTAGGCATTACGAAAAAGAATTGGCAAACTGCTCTTTCGAGTTGGGATATTGATGATGGAACATGG…
GCF_002141315.1	NZ_NGMS010000021.293.AOI_01	119.2;Lactococcin_972_(Lcn972)	LATGGIAASAATEYPDGGTWNYGVGITGSYSDYFHGTKRHSATVKKGSDESYQAQGAGVWAKARLGAYSGCNFYYNYW	TTGGCTACTGGTGGTATCGCTGCCTCAGCAGCAACGGAATACCCTGATGGTGGTACATGGAATTATGGTGTCGGTATCACAGGTTCATATTCTGATTATTTCCACGGTACTAAACGCCACAGCGCTACTGTAAAAAAAGGTTCAGACGAATCTTATCAAGCTCAAGGGGCTGGCGTGTGGGCTAAGGCTCGTCTTGGCGCATATTCAGGATGTAATTTCTATTATAATTATTGG
GCF_002141315.1	NZ_NGMS010000061.300.AOI_01	63.3;Enterolysin_A	MESQNESLIKQYVKRRTKRRLFLWLFGTSTGLLTLLITVFVTLFLILAAGSIDNSDSGSSSGGEAFTGEYSEGLPIYKEIKGKGPFSDEIAQYAVGAAVKYKLLPSVILSQYGYESAFGTSLSAKNDLNFFGITWFDGCLFPKGTARGIEGGWYMKFPNSKAAFSYYGFMVATQSNFNACVGNKSPGASLLILGRGGYAAAGITEDSAYYKNCMSIINSNQLTEYDAFAMKHWGEGGNNNGPITGEWTNPFPGSSLDKSSFSGGQLFGTNPGGEFRPNGFHDGLDFGSVDHPGSEIHAVHGGKVVYVGNPGISGLGACVIVINYDGLNMVYQEFANSTGNSRVKVGDQVKVGQVIATRDTEHLHLGFTRMDWRQAQGHAFIDDGTWIDPLPFLNSSKK	ATGGAAAGCCAAAATGAAAGTTTAATCAAGCAGTATGTTAAGCGTCGTACAAAGCGACGCTTATTTTTGTGGTTGTTTGGTACTTCTACAGGTTTGCTGACCCTCTTGATCACTGTGTTTGTGACGCTTTTTCTAATCCTTGCGGCGGGGTCGATTGATAACTCTGATTCAGGTTCAAGTAGTGGTGGTGAAGCTTTTACAGGAGAATACTCAGAAGGTTTACCCATCTATAAAGAAATCAAAGGGAAAGGTCCTTTTTCTGATGAGATTGCGCAATATGCCGTAGGAGCAGCTGTGAAATATAAATTATTACCAAGTGTGATTCTCTCGCAATATGGGTATGAATCAGCATTTGGGACGTCATTATCTGCTAAAAACGACTTGAATTTTTTTGGGATC…
GCF_002141315.1	NZ_NGMS010000071.299.AOI_01	63.3;Enterolysin_A	MESQNESLIKQYVKRRTKRRLFLWLFGTSTGLLTLLITVFVTLFLILAAGSIDNSDSGSSSGGEAFTGEYSEGLPIYKEIKGKGPFSDEIAQYAVGAAVKYKLLPSVILSQYGYESAFGTSLSAKNDLNFFGITWFDGCLFPKGTARGIEGGWYMKFPNSKAAFSYYGFMVATQSNFNACVGNKSPGASLLILGRGGYAAAGITEDSAYYKNCMSIINSNQLTEYDAFAMKHWGEGGNNNGPITGEWTNPFPGSSLDKSSFSGGQLFGTNPGGEFRPNGFHDGLDFGSVDHPGSEIHAVHGGKVVYVGNPGISGLGACVIVINYDGLNMVYQEFANSTGNSRVKVGDQVKVGQVIATRDTEHLHLGFTRMDWRQAQGHAFIDDGTWIDPLPFLNSSKK	ATGGAAAGCCAAAATGAAAGTTTAATCAAGCAGTATGTTAAGCGTCGTACAAAGCGACGCTTATTTTTGTGGTTGTTTGGTACTTCTACAGGTTTGCTGACCCTCTTGATCACTGTGTTTGTGACGCTTTTTCTAATCCTTGCGGCGGGGTCGATTGATAACTCTGATTCAGGTTCAAGTAGTGGTGGTGAAGCTTTTACAGGAGAATACTCAGAAGGTTTACCCATCTATAAAGAAATCAAAGGGAAAGGTCCTTTTTCTGATGAGATTGCGCAATATGCCGTAGGAGCAGCTGTGAAATATAAATTATTACCAAGTGTGATTCTCTCGCAATATGGGTATGAATCAGCATTTGGGACGTCATTATCTGCTAAAAACGACTTGAATTTTTTTGGGATC…
GCF_931972305.1	NZ_OV9961581.2479.AOI_01	119.2;Lactococcin_972_(Lcn972)	LATGGIAASAATEYPDGGTWNYGVGITGSYSDYFHGTKRHSATVKKGSDESYQAQGAGVWAKARLGAYSGCNFYYNYW	TTGGCTACTGGTGGTATCGCTGCCTCAGCAGCAACGGAATACCCTGATGGTGGTACATGGAATTATGGTGTCGGTATCACAGGTTCATATTCTGATTATTTCCACGGTACTAAACGCCACAGCGCTACTGTAAAAAAAGGTTCAGACGAATCTTATCAAGCTCAAGGGGCTGGCGTGTGGGCTAAGGCTCGTCTTGGCGCATATTCAGGATGTAATTTCTATTATAATTATTGG
GCF_002798425.1	NZ_PHIL010000291.348.AOI_01	225.2;UviB	MEKLIESLLSNPEQISFAVLFVGLLIWVMQQNNAREKRYQNTIDKLTDALGDVEAIKSTVEKIHEKLH	ATGGAAAAATTAATCGAATCGTTACTCTCAAACCCCGAACAGATCAGCTTTGCTGTTTTATTTGTAGGGTTACTTATCTGGGTGATGCAACAGAACAATGCCCGAGAAAAAAGGTATCAAAATACAATCGACAAGTTGACCGATGCGCTTGGTGATGTAGAAGCAATAAAAAGTACTGTGGAGAAAATTCACGAAAAATTACAT
GCF_002944895.1	NZ_PTUS010000151.355.AOI_01	95.2;Enterocin_SE-K4	MKKKFVKVLVYCSMLGIGFTALGTNTDAATYYGNGVYCNKQKCWVNWSKARSAIIDRGVKAYVNGFTKVLGGISGR	ATGAAAAAGAAGTTCGTTAAAGTTTTAGTCTATTGTAGTATGCTTGGTATTGGCTTTACAGCATTAGGAACAAATACAGACGCTGCTACGTATTACGGAAATGGTGTATATTGTAATAAACAAAAATGTTGGGTAAATTGGAGTAAAGCACGTTCTGCAATTATAGATAGAGGTGTAAAAGCATACGTCAATGGATTTACGAAAGTGTTAGGTGGTATAAGTGGAAGG
GCF_002944895.1	NZ_PTUS010000211.364.AOI_01	119.2;Lactococcin_972_(Lcn972)	MKKIVVCTLSLIVLATGGIAASAATEYPDGGTWNYGVGITGSYSDYFHGTKRHSATVKKGSDESYQAQGAGVWAKARLGAYSGCNFYYNYW	ATGAAAAAAATAGTTGTTTGTACATTATCTTTAATTGTCTTGGCTACTGGTGGTATCGCTGCCTCTGCTGCAACGGAATACCCTGATGGTGGTACATGGAATTATGGTGTCGGTATCACAGGTTCATATTCTGATTATTTCCATGGTACTAAACGCCACAGCGCTACTGTAAAAAAAGGTTCAGACGAATCTTATCAAGCTCAAGGGGCTGGCGTGTGGGCTAAGGCTCGTCTTGGCGCATATTCAGGATGTAATTTCTATTATAATTATTGG
GCF_003048275.1	NZ_PYGR010000071.482.AOI_01	119.2;Lactococcin_972_(Lcn972)	LATGGIAASAATEYPDGGTWNYGVGITGSYSDYFHGTKRHSATVKKGSDESYQAQGAGVWAKARLGAYSGCNFYYNYW	TTGGCTACTGGTGGTATTGCTGCCTCAGCAGCAACGGAATACCCTGATGGTGGTACATGGAATTATGGTGTCGGTATCACAGGTTCATATTCTGATTATTTCCATGGTACTAAACGCCACAGCGCTACTGTAAAAAAAGGTTCAGACGAATCTTATCAAGCTCAAGGGGCTGGCGTGTGGGCTAAGGCTCGTCTTGGCGCATATTCAGGATGTAATTTCTATTATAATTATTGG
GCF_003048275.1	NZ_PYGR010000081.440.AOI_01	63.3;Enterolysin_A	MESQNESLIKQYVKRRTKRRLFLWLFGTSAGLLTLLITVFVTLFLILAAGSIDNSDSGSSSGGEAFTGEYSEGLPIYKEIKGKGPFSDEIAQYAVGAAVKYKLLPSVILSQYGYESAFGTSLSAKNDLNFFGITWFDGCLFPKGTARGVGGIEGGWYMKFPNSKAAFSYYGFMVATQSNFNACVGNKSPGASLLILGRGGYAAAGITEDSAYYKNCMSIINSNQLTEYDAFAIKHWGEGGNNNGPITGEWTNPFPGSSLDKSSFSGGQLFGTNPGGEFRPNGFHDGLDFGSVDHPGSEIHAVHGGKVVYVGNPGISGLGACVIVINYDGLNMVYQEFANSTGNSRVKVGDQVKVGQVIAIRDTEHLHLGFTRMDWRQAQGHAFIDDGTWIDPLPFLNSS…	ATGGAAAGCCAAAATGAAAGTTTAATCAAGCAGTATGTTAAGCGTCGTACAAAGCGACGCTTATTTTTGTGGTTGTTTGGTACTTCTGCAGGTTTGCTTACCCTCTTGATCACTGTGTTTGTGACGCTTTTTCTAATACTGGCAGCGGGGTCGATTGATAACTCTGATTCAGGTTCAAGTAGTGGTGGTGAAGCTTTTACAGGAGAATACTCAGAAGGTTTACCCATCTATAAAGAAATCAAAGGGAAAGGTCCTTTTTCTGATGAGATTGCGCAATATGCCGTAGGAGCAGCCGTGAAATATAAATTATTACCAAGTGTGATTCTTTCGCAATACGGATATGAATCAGCGTTTGGCACGTCATTATCTGCTAAAAACGACTTGAATTTTTTTGGGATC…
GCF_003048275.1	NZ_PYGR010000471.465.AOI_01	83.2;Enterocin_CRL35	LKKLTSKEMAQVVGGKYYGNGVSCNKKGCSVDWGKAIGIIGNNSAANLATGGAAGWKS	TTGAAGAAATTAACATCAAAAGAAATGGCACAAGTAGTAGGTGGAAAATACTACGGTAATGGAGTCTCATGTAATAAAAAAGGGTGCAGTGTTGATTGGGGAAAAGCTATTGGCATTATTGGAAATAATTCTGCTGCGAATTTAGCTACTGGTGGAGCAGCTGGTTGGAAAAGT
GCF_004167255.1	NZ_RCYG010000111.699.AOI_01	119.2;Lactococcin_972_(Lcn972)	LATGGIAASAATEYPDGGTWNYGVGITGSYSDYFHGTKRHSATVKKGSDESYQAQGAGVWAKARLGAYSGCNFYYNYW	TTGGCTACTGGTGGTATCGCTGCCTCAGCAGCAACGGAATACCCTGATGGTGGTACATGGAATTATGGTGTCGGTATCACAGGTTCATATTCTGATTATTTCCATGGTACTAAACGCCACAGCGCTACTGTAAAAAAAGGTTCAGACGAATCTTATCAAGCTCAAGGGGCTGGAGTGTGGGCTAAGGCTCGTCTTGGCGCATATTCAGGATGTAATTTCTATTATAATTATTGG
GCF_004167255.1	NZ_RCYG010000201.690.AOI_01	63.3;Enterolysin_A	MDKQVENVIKQQIKRRMKRRLFLWLFGTSGGLFLLGLVLALVLFIAFAAGVPDQSGGTVGDVTFTGEYSEGLPMYDEIKGRGPFSDEIAQYAVGAAVKYKLLPSVILSQYGYESAFGTSLSAKNDLNYFGITWFDGCLFPKGTARGVGGIEGGWYMKFPTSQAAFSYYGFMVATQSNFNACVGNKSPGADLLILGRGGYAAAGITEDSAYYQGCMSIIESNHLTEYDEFAIKHWGEGNSSNGTITGEWTNPFPGTSLDQSSFSGGQLFGTNPGGEFRPNGFHDGLDFGSVDHPGSEIHAVHSGTVTYVGNPGISQLGACVIVINYDGLNMVYQEFTNNGSNARVKVGDQVKVGQVIAIRDTEHLHLGFTRMDWLEAQGHGYTNDGTWIDPLPLLNSSGG…	ATGGATAAGCAAGTGGAAAATGTGATCAAGCAACAAATCAAGCGTCGTATGAAGCGGCGCTTATTTTTGTGGCTTTTTGGGACGTCTGGAGGCTTGTTTTTATTAGGGCTTGTTCTAGCACTTGTACTATTTATAGCTTTTGCAGCAGGAGTTCCTGATCAGTCCGGAGGCACGGTTGGTGACGTTACATTTACGGGTGAATATTCTGAAGGACTCCCAATGTATGACGAAATCAAAGGACGTGGCCCTTTTTCAGACGAAATAGCGCAATACGCAGTTGGTGCAGCAGTAAAATACAAATTATTACCCAGTGTCATTCTTTCGCAGTACGGCTATGAGTCTGCTTTTGGAACGTCTTTATCTGCTAAGAATGATTTGAACTATTTTGGGATCACCTGG…
GCF_009659805.1	NZ_SZVB010000031.788.AOI_01	225.2;UviB	MEKLIESLLSNPEQISFAVLFVGLFIWVMQQNNAREKRYQNTIDKLTDALGDVEAIKSTVEKIHEKLH	ATGGAAAAATTAATCGAATCGTTACTCTCAAACCCCGAACAGATCAGCTTTGCTGTTTTATTTGTAGGGTTGTTTATCTGGGTGATGCAGCAGAACAATGCCCGAGAAAAAAGGTATCAAAATACAATCGACAAGTTGACCGATGCGCTTGGTGATGTAGAAGCAATAAAAAGTACTGTGGAGAAGATTCACGAAAAATTACAT
GCF_900447995.1	NZ_UFYG010000011.2413.AOI_01	119.2;Lactococcin_972_(Lcn972)	LATGGIAASAATEYPDGGTWNYGVGITGSYSDYFHGTKRHSATVKKGSDESYQAQGAGVWAKARLGAYSGCNFYYNYW	TTGGCTACTGGTGGTATCGCTGCCTCAGCAGCAACGGAATACCCTGATGGTGGTACATGGAATTATGGTGTCGGTATCACAGGTTCATATTCTGATTATTTCCACGGTACTAAACGCCACAGCGCTACTGTAAAAAAAGGTTCAGACGAATCTTATCAAGCTCAAGGGGCTGGCGTGTGGGCTAAGGCTCGTCTTGGCGCATATTCAGGATGTAATTTCTATTATAATTATTGG
GCF_900447995.1	NZ_UFYG010000011.2413.AOI_02	93.3;Zoocin_A	LIGTQVLGLLGSIPVEASYHLENETQVTTGSEQLIPENQDSTDAVNQSDATVDSGETKDEMDQDKEEAGVEVPNKAEDQDKTENSEEITRPSNEEINLEKPTKDESSHESEKEQPVKEDAQDTINKEIVTEDSSEKTNQSVTPTINTQSTKQTREQTAKVAVNEVPYTVESSASLPVTNGNQSASSNNEPSIEEGTKGQKNKITEEFIKNIGEDALKVAKENDLYASVMIAQAILESASGQSLLSQEPNYNLFGMKGAYQGKSVTFLTQEDNGNGQLYTVEAKFRKYETYKESLKDYAKLLKEGITGDKDFYSGTWKSKTSTYQEATKFLTGKYATDKNYHKKLNDLIVTYELTEYDHPSLKEAKTGTFTCPLEDYTLTSTFGGRGGEFHRGIDLAAPQ…	TTGATTGGCACACAAGTTTTAGGATTATTGGGAAGTATTCCTGTTGAAGCTTCCTACCATTTAGAAAATGAAACTCAAGTGACTACTGGATCAGAACAATTAATTCCTGAAAATCAAGATTCGACCGATGCGGTAAATCAATCAGACGCTACAGTAGATAGTGGAGAAACTAAAGACGAAATGGATCAAGATAAGGAAGAAGCAGGAGTTGAAGTTCCAAACAAAGCGGAGGATCAAGACAAAACAGAGAATAGTGAAGAAATCACTAGACCCAGCAACGAAGAAATTAATTTGGAGAAGCCAACTAAAGATGAAAGTAGTCACGAATCGGAAAAAGAACAACCAGTGAAAGAAGATGCACAAGATACAATTAATAAGGAGATTGTTACAGAAGACAGC…
GCF_017356615.1	NZ_VOEH010000101.1539.AOI_01	155.2;Mundticin_ATO6	LKKLTAKEMSQVVGGKYYGNGVSCNKKGCSVDWGKAIGIIGNNSAANLATGGAAGWKS	TTGAAGAAATTAACAGCAAAAGAAATGTCACAAGTAGTAGGTGGAAAATACTACGGTAATGGAGTCTCATGTAATAAAAAAGGGTGCAGTGTTGATTGGGGAAAAGCTATTGGCATTATTGGAAATAATTCTGCTGCGAATTTAGCTACTGGTGGAGCAGCTGGTTGGAAAAGT
GCF_009890745.1	NZ_WXOP010000111.804.AOI_01	119.2;Lactococcin_972_(Lcn972)	LATGGIAASAATEYPDGGTWNYGVGITGSYSDYFHGTKRHSATVKKGSDESYQAQGAGVWAKARLGAYSGCNFYYNYW	TTGGCTACTGGTGGTATCGCTGCCTCAGCAGCAACGGAATACCCTGATGGTGGTACATGGAATTATGGTGTCGGTATCACAGGTTCATATTCTGATTATTTCCATGGTACTAAACGCCACAGCGCTACTGTAAAAAAAGGTTCAGACGAATCTTATCAAGCTCAAGGGGCTGGAGTGTGGGCTAAGGCTCGTCTTGGCGCATATTCAGGATGTAATTTCTATTATAATTATTGG
GCF_009890745.1	NZ_WXOP010000211.819.AOI_01	63.3;Enterolysin_A	MDKQVENVIKQQIKRRMKRRLFLWLFGTSGGLFLLGLVLALVLFIAFAAGVPDQSGGTVGDVTFTGEYSEGLPMYDEIKGRGPFSDEIAQYAVGAAVKYKLLPSVILSQYGYESAFGTSLSAKNDLNYFGITWFDGCLFPKGTARGVGGIEGGWYMKFPTSQAAFSYYGFMVATQSNFNACVGNKSPGADLLILGRGGYAAAGITEDSAYYQGCMSIIESNHLTEYDEFAIKHWGEGNSSNGTITGEWTNPFPGTSLDQSSFSGGQLFGTNPGGEFRPNGFHDGLDFGSVDHPGSEIHAVHSGTVTYVGNPGISQLGACVIVINYDGLNMVYQEFTNNGSNARVKVGDQVKVGQVIAIRDTEHLHLGFTRMDWLEAQGHGYTNDGTWIDPLPLLNSSGG…	ATGGATAAGCAAGTGGAAAATGTGATCAAGCAACAAATCAAGCGTCGTATGAAGCGGCGCTTATTTTTGTGGCTTTTTGGGACGTCTGGAGGCTTGTTTTTATTAGGGCTTGTTCTAGCACTTGTACTATTTATAGCTTTTGCAGCAGGAGTTCCTGATCAGTCCGGAGGCACGGTTGGTGACGTTACATTTACGGGTGAATATTCTGAAGGACTCCCAATGTATGACGAAATCAAAGGACGTGGCCCTTTTTCAGACGAAATAGCGCAATACGCAGTTGGTGCAGCAGTAAAATACAAATTATTACCCAGTGTCATTCTTTCGCAGTACGGCTATGAGTCTGCTTTTGGAACGTCTTTATCTGCTAAGAATGATTTGAACTATTTTGGGATCACCTGG…
GCF_009890755.1	NZ_WXOQ010000111.833.AOI_01	119.2;Lactococcin_972_(Lcn972)	LATGGIAASAATEYPDGGTWNYGVGITGSYSDYFHGTKRHSATVKKGSDESYQAQGAGVWAKARLGAYSGCNFYYNYW	TTGGCTACTGGTGGTATCGCTGCCTCAGCAGCAACGGAATACCCTGATGGTGGTACATGGAATTATGGTGTCGGTATCACAGGTTCATATTCTGATTATTTCCATGGTACTAAACGCCACAGCGCTACTGTAAAAAAAGGTTCAGACGAATCTTATCAAGCTCAAGGGGCTGGAGTGTGGGCTAAGGCTCGTCTTGGCGCATATTCAGGATGTAATTTCTATTATAATTATTGG
GCF_009890755.1	NZ_WXOQ010000201.836.AOI_01	63.3;Enterolysin_A	MDKQVENVIKQQIKRRMKRRLFLWLFGTSGGLFLLGLVLALVLFIAFAAGVPDQSGGTVGDVTFTGEYSEGLPMYDEIKGRGPFSDEIAQYAVGAAVKYKLLPSVILSQYGYESAFGTSLSAKNDLNYFGITWFDGCLFPKGTARGVGGIEGGWYMKFPTSQAAFSYYGFMVATQSNFNACVGNKSPGADLLILGRGGYAAAGITEDSAYYQGCMSIIESNHLTEYDEFAIKHWGEGNSSNGTITGEWTNPFPGTSLDQSSFSGGQLFGTNPGGEFRPNGFHDGLDFGSVDHPGSEIHAVHSGTVTYVGNPGISQLGACVIVINYDGLNMVYQEFTNNGSNARVKVGDQVKVGQVIAIRDTEHLHLGFTRMDWLEAQGHGYTNDGTWIDPLPLLNSSGG…	ATGGATAAGCAAGTGGAAAATGTGATCAAGCAACAAATCAAGCGTCGTATGAAGCGGCGCTTATTTTTGTGGCTTTTTGGGACGTCTGGAGGCTTGTTTTTATTAGGGCTTGTTCTAGCACTTGTACTATTTATAGCTTTTGCAGCAGGAGTTCCTGATCAGTCCGGAGGCACGGTTGGTGACGTTACATTTACGGGTGAATATTCTGAAGGACTCCCAATGTATGACGAAATCAAAGGACGTGGCCCTTTTTCAGACGAAATAGCGCAATACGCAGTTGGTGCAGCAGTAAAATACAAATTATTACCCAGTGTCATTCTTTCGCAGTACGGCTATGAGTCTGCTTTTGGAACGTCTTTATCTGCTAAGAATGATTTGAACTATTTTGGGATCACCTGG…
GCF_009890785.1	NZ_WXOR010000111.877.AOI_01	119.2;Lactococcin_972_(Lcn972)	LATGGIAASAATEYPDGGTWNYGVGITGSYSDYFHGTKRHSATVKKGSDESYQAQGAGVWAKARLGAYSGCNFYYNYW	TTGGCTACTGGTGGTATCGCTGCCTCAGCAGCAACGGAATACCCTGATGGTGGTACATGGAATTATGGTGTCGGTATCACAGGTTCATATTCTGATTATTTCCATGGTACTAAACGCCACAGCGCTACTGTAAAAAAAGGTTCAGACGAATCTTATCAAGCTCAAGGGGCTGGAGTGTGGGCTAAGGCTCGTCTTGGCGCATATTCAGGATGTAATTTCTATTATAATTATTGG
GCF_009890785.1	NZ_WXOR010000201.872.AOI_01	63.3;Enterolysin_A	MDKQVENVIKQQIKRRMKRRLFLWLFGTSGGLFLLGLVLALVLFIAFAAGVPDQSGGTVGDVTFTGEYSEGLPMYDEIKGRGPFSDEIAQYAVGAAVKYKLLPSVILSQYGYESAFGTSLSAKNDLNYFGITWFDGCLFPKGTARGVGGIEGGWYMKFPTSQAAFSYYGFMVATQSNFNACVGNKSPGADLLILGRGGYAAAGITEDSAYYQGCMSIIESNHLTEYDEFAIKHWGEGNSSNGTITGEWTNPFPGTSLDQSSFSGGQLFGTNPGGEFRPNGFHDGLDFGSVDHPGSEIHAVHSGTVTYVGNPGISQLGACVIVINYDGLNMVYQEFTNNGSNARVKVGDQVKVGQVIAIRDTEHLHLGFTRMDWLEAQGHGYTNDGTWIDPLPLLNSSGG…	ATGGATAAGCAAGTGGAAAATGTGATCAAGCAACAAATCAAGCGTCGTATGAAGCGGCGCTTATTTTTGTGGCTTTTTGGGACGTCTGGAGGCTTGTTTTTATTAGGGCTTGTTCTAGCACTTGTACTATTTATAGCTTTTGCAGCAGGAGTTCCTGATCAGTCCGGAGGCACGGTTGGTGACGTTACATTTACGGGTGAATATTCTGAAGGACTCCCAATGTATGACGAAATCAAAGGACGTGGCCCTTTTTCAGACGAAATAGCGCAATACGCAGTTGGTGCAGCAGTAAAATACAAATTATTACCCAGTGTCATTCTTTCGCAGTACGGCTATGAGTCTGCTTTTGGAACGTCTTTATCTGCTAAGAATGATTTGAACTATTTTGGGATCACCTGG…
GCF_009890805.1	NZ_WXOS010000111.906.AOI_01	119.2;Lactococcin_972_(Lcn972)	LATGGIAASAATEYPDGGTWNYGVGITGSYSDYFHGTKRHSATVKKGSDESYQAQGAGVWAKARLGAYSGCNFYYNYW	TTGGCTACTGGTGGTATCGCTGCCTCAGCAGCAACGGAATACCCTGATGGTGGTACATGGAATTATGGTGTCGGTATCACAGGTTCATATTCTGATTATTTCCATGGTACTAAACGCCACAGCGCTACTGTAAAAAAAGGTTCAGACGAATCTTATCAAGCTCAAGGGGCTGGAGTGTGGGCTAAGGCTCGTCTTGGCGCATATTCAGGATGTAATTTCTATTATAATTATTGG
GCF_009890805.1	NZ_WXOS010000191.903.AOI_01	63.3;Enterolysin_A	MDKQVENVIKQQIKRRMKRRLFLWLFGTSGGLFLLGLVLALVLFIAFAAGVPDQSGGTVGDVTFTGEYSEGLPMYDEIKGRGPFSDEIAQYAVGAAVKYKLLPSVILSQYGYESAFGTSLSAKNDLNYFGITWFDGCLFPKGTARGVGGIEGGWYMKFPTSQAAFSYYGFMVATQSNFNACVGNKSPGADLLILGRGGYAAAGITEDSAYYQGCMSIIESNHLTEYDEFAIKHWGEGNSSNGTITGEWTNPFPGTSLDQSSFSGGQLFGTNPGGEFRPNGFHDGLDFGSVDHPGSEIHAVHSGTVTYVGNPGISQLGACVIVINYDGLNMVYQEFTNNGSNARVKVGDQVKVGQVIAIRDTEHLHLGFTRMDWLEAQGHGYTNDGTWIDPLPLLNSSGG…	ATGGATAAGCAAGTGGAAAATGTGATCAAGCAACAAATCAAGCGTCGTATGAAGCGGCGCTTATTTTTGTGGCTTTTTGGGACGTCTGGAGGCTTGTTTTTATTAGGGCTTGTTCTAGCACTTGTACTATTTATAGCTTTTGCAGCAGGAGTTCCTGATCAGTCCGGAGGCACGGTTGGTGACGTTACATTTACGGGTGAATATTCTGAAGGACTCCCAATGTATGACGAAATCAAAGGACGTGGCCCTTTTTCAGACGAAATAGCGCAATACGCAGTTGGTGCAGCAGTAAAATACAAATTATTACCCAGTGTCATTCTTTCGCAGTACGGCTATGAGTCTGCTTTTGGAACGTCTTTATCTGCTAAGAATGATTTGAACTATTTTGGGATCACCTGG…
GCF_009890865.1	NZ_WXOT010000101.981.AOI_01	119.2;Lactococcin_972_(Lcn972)	LATGGIAASAATEYPDGGTWNYGVGITGSYSDYFHGTKRHSATVKKGSDESYQAQGAGVWAKARLGAYSGCNFYYNYW	TTGGCTACTGGTGGTATCGCTGCCTCAGCAGCAACGGAATACCCTGATGGTGGTACATGGAATTATGGTGTCGGTATCACAGGTTCATATTCTGATTATTTCCATGGTACTAAACGCCACAGCGCTACTGTAAAAAAAGGTTCAGACGAATCTTATCAAGCTCAAGGGGCTGGAGTGTGGGCTAAGGCTCGTCTTGGCGCATATTCAGGATGTAATTTCTATTATAATTATTGG
GCF_009890865.1	NZ_WXOT010000181.975.AOI_01	63.3;Enterolysin_A	MDKQVENVIKQQIKRRMKRRLFLWLFGTSGGLFLLGLVLALVLFIAFAAGVPDQSGGTVGDVTFTGEYSEGLPMYDEIKGRGPFSDEIAQYAVGAAVKYKLLPSVILSQYGYESAFGTSLSAKNDLNYFGITWFDGCLFPKGTARGVGGIEGGWYMKFPTSQAAFSYYGFMVATQSNFNACVGNKSPGADLLILGRGGYAAAGITEDSAYYQGCMSIIESNHLTEYDEFAIKHWGEGNSSNGTITGEWTNPFPGTSLDQSSFSGGQLFGTNPGGEFRPNGFHDGLDFGSVDHPGSEIHAVHSGTVTYVGNPGISQLGACVIVINYDGLNMVYQEFTNNGSNARVKVGDQVKVGQVIAIRDTEHLHLGFTRMDWLEAQGHGYTNDGTWIDPLPLLNSSGG…	ATGGATAAGCAAGTGGAAAATGTGATCAAGCAACAAATCAAGCGTCGTATGAAGCGGCGCTTATTTTTGTGGCTTTTTGGGACGTCTGGAGGCTTGTTTTTATTAGGGCTTGTTCTAGCACTTGTACTATTTATAGCTTTTGCAGCAGGAGTTCCTGATCAGTCCGGAGGCACGGTTGGTGACGTTACATTTACGGGTGAATATTCTGAAGGACTCCCAATGTATGACGAAATCAAAGGACGTGGCCCTTTTTCAGACGAAATAGCGCAATACGCAGTTGGTGCAGCAGTAAAATACAAATTATTACCCAGTGTCATTCTTTCGCAGTACGGCTATGAGTCTGCTTTTGGAACGTCTTTATCTGCTAAGAATGATTTGAACTATTTTGGGATCACCTGG…
GCF_009890815.1	NZ_WXOU010000111.942.AOI_01	119.2;Lactococcin_972_(Lcn972)	LATGGIAASAATEYPDGGTWNYGVGITGSYSDYFHGTKRHSATVKKGSDESYQAQGAGVWAKARLGAYSGCNFYYNYW	TTGGCTACTGGTGGTATCGCTGCCTCAGCAGCAACGGAATACCCTGATGGTGGTACATGGAATTATGGTGTCGGTATCACAGGTTCATATTCTGATTATTTCCATGGTACTAAACGCCACAGCGCTACTGTAAAAAAAGGTTCAGACGAATCTTATCAAGCTCAAGGGGCTGGAGTGTGGGCTAAGGCTCGTCTTGGCGCATATTCAGGATGTAATTTCTATTATAATTATTGG
GCF_009890815.1	NZ_WXOU010000121.937.AOI_01	63.3;Enterolysin_A	MSIIQSNNLTQYDDFAIQKWKDFGSNISGSVGGGWVWPFPEVGQGSFAGGQLFGKNPGGEFRENGFHNGLEFGSVDHHGNEIHAIHGGTVTYVGNPGISGLGACVIVINGSGLNMVYQEFATSTSNAKVKVGDKVKLGDVIGIRDTEHLHLGITKKDWLQAESSAFTDDGTWLDPLKIITTGKY	ATGTCAATCATTCAGTCGAATAATCTGACACAATATGATGATTTTGCGATCCAAAAATGGAAAGATTTTGGTAGTAACATAAGTGGCTCAGTTGGTGGTGGCTGGGTATGGCCGTTCCCAGAAGTCGGACAAGGATCTTTTGCAGGTGGTCAATTATTTGGTAAAAATCCTGGTGGGGAATTTCGAGAAAATGGTTTTCACAACGGATTGGAGTTTGGATCGGTAGATCACCATGGAAATGAAATTCACGCCATTCATGGTGGAACGGTCACTTATGTTGGAAATCCTGGTATTTCGGGGTTAGGTGCTTGTGTGATCGTCATTAATGGTAGTGGATTAAATATGGTTTATCAAGAGTTCGCCACAAGTACCAGCAATGCAAAGGTTAAAGTAGGTGAT…
GCF_009890815.1	NZ_WXOU010000201.916.AOI_01	63.3;Enterolysin_A	MDKQVENVIKQQIKRRMKRRLFLWLFGTSGGLFLLGLVLALVLFIAFAAGVPDQSGGTVGDVTFTGEYSEGLPMYDEIKGRGPFSDEIAQYAVGAAVKYKLLPSVILSQYGYESAFGTSLSAKNDLNYFGITWFDGCLFPKGTARGVGGIEGGWYMKFPTSQAAFSYYGFMVATQSNFNACVGNKSPGADLLILGRGGYAAAGITEDSAYYQGCMSIIESNHLTEYDEFAIKHWGEGNSSNGTITGEWTNPFPGTSLDQSSFSGGQLFGTNPGGEFRPNGFHDGLDFGSVDHPGSEIHAVHSGTVTYVGNPGISQLGACVIVINYDGLNMVYQEFTNNGSNARVKVGDQVKVGQVIAIRDTEHLHLGFTRMDWLEAQGHGYTNDGTWIDPLPLLNSSGG…	ATGGATAAGCAAGTGGAAAATGTGATCAAGCAACAAATCAAGCGTCGTATGAAGCGGCGCTTATTTTTGTGGCTTTTTGGGACGTCTGGAGGCTTGTTTTTATTAGGGCTTGTTCTAGCACTTGTACTATTTATAGCTTTTGCAGCAGGAGTTCCTGATCAGTCCGGAGGCACGGTTGGTGACGTTACATTTACGGGTGAATATTCTGAAGGACTCCCAATGTATGACGAAATCAAAGGACGTGGCCCTTTTTCAGACGAAATAGCGCAATACGCAGTTGGTGCAGCAGTAAAATACAAATTATTACCCAGTGTCATTCTTTCGCAGTACGGCTATGAGTCTGCTTTTGGAACGTCTTTATCTGCTAAGAATGATTTGAACTATTTTGGGATCACCTGG…
GCF_009890825.1	NZ_WXOV010000111.951.AOI_01	119.2;Lactococcin_972_(Lcn972)	LATGGIAASAATEYPDGGTWNYGVGITGSYSDYFHGTKRHSATVKKGSDESYQAQGAGVWAKARLGAYSGCNFYYNYW	TTGGCTACTGGTGGTATCGCTGCCTCAGCAGCAACGGAATACCCTGATGGTGGTACATGGAATTATGGTGTCGGTATCACAGGTTCATATTCTGATTATTTCCATGGTACTAAACGCCACAGCGCTACTGTAAAAAAAGGTTCAGACGAATCTTATCAAGCTCAAGGGGCTGGAGTGTGGGCTAAGGCTCGTCTTGGCGCATATTCAGGATGTAATTTCTATTATAATTATTGG
GCF_009890825.1	NZ_WXOV010000191.943.AOI_01	63.3;Enterolysin_A	MDKQVENVIKQQIKRRMKRRLFLWLFGTSGGLFLLGLVLALVLFIAFAAGVPDQSGGTVGDVTFTGEYSEGLPMYDEIKGRGPFSDEIAQYAVGAAVKYKLLPSVILSQYGYESAFGTSLSAKNDLNYFGITWFDGCLFPKGTARGVGGIEGGWYMKFPTSQAAFSYYGFMVATQSNFNACVGNKSPGADLLILGRGGYAAAGITEDSAYYQGCMSIIESNHLTEYDEFAIKHWGEGNSSNGTITGEWTNPFPGTSLDQSSFSGGQLFGTNPGGEFRPNGFHDGLDFGSVDHPGSEIHAVHSGTVTYVGNPGISQLGACVIVINYDGLNMVYQEFTNNGSNARVKVGDQVKVGQVIAIRDTEHLHLGFTRMDWLEAQGHGYTNDGTWIDPLPLLNSSGG…	ATGGATAAGCAAGTGGAAAATGTGATCAAGCAACAAATCAAGCGTCGTATGAAGCGGCGCTTATTTTTGTGGCTTTTTGGGACGTCTGGAGGCTTGTTTTTATTAGGGCTTGTTCTAGCACTTGTACTATTTATAGCTTTTGCAGCAGGAGTTCCTGATCAGTCCGGAGGCACGGTTGGTGACGTTACATTTACGGGTGAATATTCTGAAGGACTCCCAATGTATGACGAAATCAAAGGACGTGGCCCTTTTTCAGACGAAATAGCGCAATACGCAGTTGGTGCAGCAGTAAAATACAAATTATTACCCAGTGTCATTCTTTCGCAGTACGGCTATGAGTCTGCTTTTGGAACGTCTTTATCTGCTAAGAATGATTTGAACTATTTTGGGATCACCTGG…
GCF_009890875.1	NZ_WXOW010000241.1015.AOI_01	63.3;Enterolysin_A	MDKQVENVIKQQIKRRMKRRLFLWLFGTSGGLFLLGLVLALVLFIAFAAGVPDQSGGTVGDVTFTGEYSEGLPMYDEIKGRGPFSDEIAQYAVGAAVKYKLLPSVILSQYGYESAFGTSLSAKNDLNYFGITWFDGCLFPKGTARGVGGIEGGWYMKFPTSQAAFSYYGFMVATQSNFNACVGNKSPGADLLILGRGGYAAAGITEDSAYYQGCMSIIESNHLTEYDEFAIKHWGEGNSSNGTITGEWTNPFPGTSLDQSSFSGGQLFGTNPGGEFRPNGFHDGLDFGSVDHPGSEIHAVHSGTVTYVGNPGISQLGACVIVINYDGLNMVYQEFTNNGSNARVKVGDQVKVGQVIAIRDTEHLHLGFTRMDWLEAQGHGYTNDGTWIDPLPLLNSSGG…	ATGGATAAGCAAGTGGAAAATGTGATCAAGCAACAAATCAAGCGTCGTATGAAGCGGCGCTTATTTTTGTGGCTTTTTGGGACGTCTGGAGGCTTGTTTTTATTAGGGCTTGTTCTAGCACTTGTACTATTTATAGCTTTTGCAGCAGGAGTTCCTGATCAGTCCGGAGGCACGGTTGGTGACGTTACATTTACGGGTGAATATTCTGAAGGACTCCCAATGTATGACGAAATCAAAGGACGTGGCCCTTTTTCAGACGAAATAGCGCAATACGCAGTTGGTGCAGCAGTAAAATACAAATTATTACCCAGTGTCATTCTTTCGCAGTACGGCTATGAGTCTGCTTTTGGAACGTCTTTATCTGCTAAGAATGATTTGAACTATTTTGGGATCACCTGG…
GCF_009890875.1	NZ_WXOW010000281.1020.AOI_01	119.2;Lactococcin_972_(Lcn972)	LATGGIAASAATEYPDGGTWNYGVGITGSYSDYFHGTKRHSATVKKGSDESYQAQGAGVWAKARLGAYSGCNFYYNYW	TTGGCTACTGGTGGTATCGCTGCCTCAGCAGCAACGGAATACCCTGATGGTGGTACATGGAATTATGGTGTCGGTATCACAGGTTCATATTCTGATTATTTCCATGGTACTAAACGCCACAGCGCTACTGTAAAAAAAGGTTCAGACGAATCTTATCAAGCTCAAGGGGCTGGAGTGTGGGCTAAGGCTCGTCTTGGCGCATATTCAGGATGTAATTTCTATTATAATTATTGG
GCF_009890875.1	NZ_WXOW010000331.1045.AOI_01	63.3;Enterolysin_A	MMGILFLFFGVDDSETSGSATGGAEFIGAYSEDLPSYPEIKGVGNVPDEIAQLAVGSAVKYHLLPSVIISQWAYESEWGHSQSAKTDNNFFGITWFEGCPFPKGTARGIGGSKGGNYMKFPNKKSAFSYYGYMVASQSNFNACVGNKSPSECLLILGRGGYATAGITESSPYFTGCMSIIQSNNLTQYDDFAIQKWKDFGSNTSGSVGGGWGWPFPEVGQGSFAGGQLFGKNPGGEFRENGFHDGLDFGSVDHPGNEIHAIHGGTVNYVGNPGISGLGACVIVINDSGLNMVYQEFATSTSNAKVKVGDKVKLGDVIGIRDTEHLHLGITKKDWLxxxxxxxxxxxxxxxxxxxxxxxxxxxxxxxxxxxxxxxxxxxxxxxxxxxxxxxxxxxxxxxx…	ATGATGGGGATTCTGTTTCTTTTCTTTGGCGTCGATGATTCTGAGACAAGTGGATCAGCTACTGGCGGAGCAGAATTTATTGGTGCTTATTCAGAAGATTTACCTTCTTATCCTGAGATCAAAGGAGTTGGAAATGTGCCTGATGAAATCGCCCAATTAGCGGTAGGTTCAGCTGTAAAATATCACTTGTTGCCAAGTGTGATTATTAGTCAGTGGGCGTATGAAAGTGAATGGGGGCATTCACAGTCTGCAAAGACTGATAATAATTTCTTTGGAATCACATGGTTTGAAGGCTGTCCGTTTCCTAAAGGTACCGCTCGAGGGATAGGCGGTTCAAAAGGTGGAAATTATATGAAGTTTCCGAATAAAAAATCAGCCTTTAGTTATTATGGCTATATG…
GCF_009890905.1	NZ_WXOX010000111.1075.AOI_01	119.2;Lactococcin_972_(Lcn972)	LATGGIAASAATEYPDGGTWNYGVGITGSYSDYFHGTKRHSATVKKGSDESYQAQGAGVWAKARLGAYSGCNFYYNYW	TTGGCTACTGGTGGTATCGCTGCCTCAGCAGCAACGGAATACCCTGATGGTGGTACATGGAATTATGGTGTCGGTATCACAGGTTCATATTCTGATTATTTCCATGGTACTAAACGCCACAGCGCTACTGTAAAAAAAGGTTCAGACGAATCTTATCAAGCTCAAGGGGCTGGAGTGTGGGCTAAGGCTCGTCTTGGCGCATATTCAGGATGTAATTTCTATTATAATTATTGG
GCF_009890905.1	NZ_WXOX010000121.1077.AOI_01	63.3;Enterolysin_A	MKFPNKKSTFSYYGYMVASQSNFNACVGNKSPSECLLILGRGSYATAGITESSPYFTGCMSIIQSNNLTQYDDFAIQKWKDFGSNTSGSVGGGWGWPFPEVGQGSFAGGQLFGKNPGGEFRENGFHDGLDFGSVDHPGNEIHAIHGGTVNYVGNPGISGLGACVIVINDSGLNMVYQExSNFNACVGNKSPSECLLILGRGSYATAGITESSPYFTGCMSIIQSNNLTQYDDFAIQKWKDFGSNISGSVGGGWVWPFPEVGQGSFAGGQLFGKNPGGEFRENGFHNGLEFGSVDHHGNEIHAIHGGTVTYVGNPGISGLGACVIVINGSGLNMVYQEFATSTSNAKVKVGDKVKLGDVIGIRDTEHLHLGITKKDWLQAESSAFTDDGTWLDPLKIITT…	ATGAAGTTTCCGAATAAAAAATCTACCTTTAGTTATTATGGCTATATGGTGGCTTCACAATCGAATTTTAATGCGTGTGTGGGGAATAAAAGTCCTAGTGAATGTTTATTGATACTAGGAAGAGGCAGTTATGCTACGGCTGGTATTACAGAAAGTAGTCCTTATTTTACAGGTTGTATGTCAATCATTCAGTCGAATAATCTGACACAATATGATGATTTTGCGATCCAAAAATGGAAAGATTTTGGTAGTAACACAAGTGGTTCAGTTGGTGGTGGCTGGGGCTGGCCATTTCCTGAAGTTGGACAAGGATCTTTTGCAGGCGGTCAATTATTTGGTAAAAATCCTGGTGGAGAATTTCGAGAAAATGGTTTTCACGACGGATTGGACTTCGGATCA…
GCF_009890905.1	NZ_WXOX010000211.1061.AOI_01	63.3;Enterolysin_A	MDKQVENVIKQQIKRRMKRRLFLWLFGTSGGLFLLGLVLALVLFIAFAAGVPDQSGGTVGDVTFTGEYSEGLPMYDEIKGRGPFSDEIAQYAVGAAVKYKLLPSVILSQYGYESAFGTSLSAKNDLNYFGITWFDGCLFPKGTARGVGGIEGGWYMKFPTSQAAFSYYGFMVATQSNFNACVGNKSPGADLLILGRGGYAAAGITEDSAYYQGCMSIIESNHLTEYDEFAIKHWGEGNSSNGTITGEWTNPFPGTSLDQSSFSGGQLFGTNPGGEFRPNGFHDGLDFGSVDHPGSEIHAVHSGTVTYVGNPGISQLGACVIVINYDGLNMVYQEFTNNGSNARVKVGDQVKVGQVIAIRDTEHLHLGFTRMDWLEAQGHGYTNDGTWIDPLPLLNSSGG…	ATGGATAAGCAAGTGGAAAATGTGATCAAGCAACAAATCAAGCGTCGTATGAAGCGGCGCTTATTTTTGTGGCTTTTTGGGACGTCTGGAGGCTTGTTTTTATTAGGGCTTGTTCTAGCACTTGTACTATTTATAGCTTTTGCAGCAGGAGTTCCTGATCAGTCCGGAGGCACGGTTGGTGACGTTACATTTACGGGTGAATATTCTGAAGGACTCCCAATGTATGACGAAATCAAAGGACGTGGCCCTTTTTCAGACGAAATAGCGCAATACGCAGTTGGTGCAGCAGTAAAATACAAATTATTACCCAGTGTCATTCTTTCGCAGTACGGCTATGAGTCTGCTTTTGGAACGTCTTTATCTGCTAAGAATGATTTGAACTATTTTGGGATCACCTGG…
GCF_009890915.1	NZ_WXOY010000101.1090.AOI_01	119.2;Lactococcin_972_(Lcn972)	LATGGIAASAATEYPDGGTWNYGVGITGSYSDYFHGTKRHSATVKKGSDESYQAQGAGVWAKARLGAYSGCNFYYNYW	TTGGCTACTGGTGGTATCGCTGCCTCAGCAGCAACGGAATACCCTGATGGTGGTACATGGAATTATGGTGTCGGTATCACAGGTTCATATTCTGATTATTTCCATGGTACTAAACGCCACAGCGCTACTGTAAAAAAAGGTTCAGACGAATCTTATCAAGCTCAAGGGGCTGGAGTGTGGGCTAAGGCTCGTCTTGGCGCATATTCAGGATGTAATTTCTATTATAATTATTGG
GCF_009890915.1	NZ_WXOY010000221.1115.AOI_01	63.3;Enterolysin_A	MDKQVENVIKQQIKRRMKRRLFLWLFGTSGGLFLLGLVLALVLFIAFAAGVPDQSGGTVGDVTFTGEYSEGLPMYDEIKGRGPFSDEIAQYAVGAAVKYKLLPSVILSQYGYESAFGTSLSAKNDLNYFGITWFDGCLFPKGTARGVGGIEGGWYMKFPTSQAAFSYYGFMVATQSNFNACVGNKSPGADLLILGRGGYAAAGITEDSAYYQGCMSIIESNHLTEYDEFAIKHWGEGNSSNGTITGEWTNPFPGTSLDQSSFSGGQLFGTNPGGEFRPNGFHDGLDFGSVDHPGSEIHAVHSGTVTYVGNPGISQLGACVIVINYDGLNMVYQEFTNNGSNARVKVGDQVKVGQVIAIRDTEHLHLGFTRMDWLEAQGHGYTNDGTWIDPLPLLNSSGG…	ATGGATAAGCAAGTGGAAAATGTGATCAAGCAACAAATCAAGCGTCGTATGAAGCGGCGCTTATTTTTGTGGCTTTTTGGGACGTCTGGAGGCTTGTTTTTATTAGGGCTTGTTCTAGCACTTGTACTATTTATAGCTTTTGCAGCAGGAGTTCCTGATCAGTCCGGAGGCACGGTTGGTGACGTTACATTTACGGGTGAATATTCTGAAGGACTCCCAATGTATGACGAAATCAAAGGACGTGGCCCTTTTTCAGACGAAATAGCGCAATACGCAGTTGGTGCAGCAGTAAAATACAAATTATTACCCAGTGTCATTCTTTCGCAGTACGGCTATGAGTCTGCTTTTGGAACGTCTTTATCTGCTAAGAATGATTTGAACTATTTTGGGATCACCTGG…
GCF_009890935.1	NZ_WXOZ010000071.1163.AOI_01	119.2;Lactococcin_972_(Lcn972)	LATGGIAASAATEYPDGGTWNYGVGITGSYSDYFHGTKRHSATVKKGSDESYQAQGAGVWAKARLGAYSGCNFYYNYW	TTGGCTACTGGTGGTATCGCTGCCTCAGCAGCAACGGAATACCCTGATGGTGGTACATGGAATTATGGTGTCGGTATCACAGGTTCATATTCTGATTATTTCCATGGTACTAAACGCCACAGCGCTACTGTAAAAAAAGGTTCAGACGAATCTTATCAAGCTCAAGGGGCTGGAGTGTGGGCTAAGGCTCGTCTTGGCGCATATTCAGGATGTAATTTCTATTATAATTATTGG
GCF_009890935.1	NZ_WXOZ010000251.1157.AOI_01	63.3;Enterolysin_A	MDKQVENVIKQQIKRRMKRRLFLWLFGTSGGLFLLGLVLALVLFIAFAAGVPDQSGGTVGDVTFTGEYSEGLPMYDEIKGRGPFSDEIAQYAVGAAVKYKLLPSVILSQYGYESAFGTSLSAKNDLNYFGITWFDGCLFPKGTARGVGGIEGGWYMKFPTSQAAFSYYGFMVATQSNFNACVGNKSPGADLLILGRGGYAAAGITEDSAYYQGCMSIIESNHLTEYDEFAIKHWGEGNSSNGTITGEWTNPFPGTSLDQSSFSGGQLFGTNPGGEFRPNGFHDGLDFGSVDHPGSEIHAVHSGTVTYVGNPGISQLGACVIVINYDGLNMVYQEFTNNGSNARVKVGDQVKVGQVIAIRDTEHLHLGFTRMDWLEAQGHGYTNDGTWIDPLPLLNSSGG…	ATGGATAAGCAAGTGGAAAATGTGATCAAGCAACAAATCAAGCGTCGTATGAAGCGGCGCTTATTTTTGTGGCTTTTTGGGACGTCTGGAGGCTTGTTTTTATTAGGGCTTGTTCTAGCACTTGTACTATTTATAGCTTTTGCAGCAGGAGTTCCTGATCAGTCCGGAGGCACGGTTGGTGACGTTACATTTACGGGTGAATATTCTGAAGGACTCCCAATGTATGACGAAATCAAAGGACGTGGCCCTTTTTCAGACGAAATAGCGCAATACGCAGTTGGTGCAGCAGTAAAATACAAATTATTACCCAGTGTCATTCTTTCGCAGTACGGCTATGAGTCTGCTTTTGGAACGTCTTTATCTGCTAAGAATGATTTGAACTATTTTGGGATCACCTGG…
GCF_009890985.1	NZ_WXPA010000111.1182.AOI_01	119.2;Lactococcin_972_(Lcn972)	LATGGIAASAATEYPDGGTWNYGVGITGSYSDYFHGTKRHSATVKKGSDESYQAQGAGVWAKARLGAYSGCNFYYNYW	TTGGCTACTGGTGGTATCGCTGCCTCAGCAGCAACGGAATACCCTGATGGTGGTACATGGAATTATGGTGTCGGTATCACAGGTTCATATTCTGATTATTTCCATGGTACTAAACGCCACAGCGCTACTGTAAAAAAAGGTTCAGACGAATCTTATCAAGCTCAAGGGGCTGGAGTGTGGGCTAAGGCTCGTCTTGGCGCATATTCAGGATGTAATTTCTATTATAATTATTGG
GCF_009890985.1	NZ_WXPA010000201.1185.AOI_01	63.3;Enterolysin_A	MDKQVENVIKQQIKRRMKRRLFLWLFGTSGGLFLLGLVLALVLFIAFAAGVPDQSGGTVGDVTFTGEYSEGLPMYDEIKGRGPFSDEIAQYAVGAAVKYKLLPSVILSQYGYESAFGTSLSAKNDLNYFGITWFDGCLFPKGTARGVGGIEGGWYMKFPTSQAAFSYYGFMVATQSNFNACVGNKSPGADLLILGRGGYAAAGITEDSAYYQGCMSIIESNHLTEYDEFAIKHWGEGNSSNGTITGEWTNPFPGTSLDQSSFSGGQLFGTNPGGEFRPNGFHDGLDFGSVDHPGSEIHAVHSGTVTYVGNPGISQLGACVIVINYDGLNMVYQEFTNNGSNARVKVGDQVKVGQVIAIRDTEHLHLGFTRMDWLEAQGHGYTNDGTWIDPLPLLNSSGG…	ATGGATAAGCAAGTGGAAAATGTGATCAAGCAACAAATCAAGCGTCGTATGAAGCGGCGCTTATTTTTGTGGCTTTTTGGGACGTCTGGAGGCTTGTTTTTATTAGGGCTTGTTCTAGCACTTGTACTATTTATAGCTTTTGCAGCAGGAGTTCCTGATCAGTCCGGAGGCACGGTTGGTGACGTTACATTTACGGGTGAATATTCTGAAGGACTCCCAATGTATGACGAAATCAAAGGACGTGGCCCTTTTTCAGACGAAATAGCGCAATACGCAGTTGGTGCAGCAGTAAAATACAAATTATTACCCAGTGTCATTCTTTCGCAGTACGGCTATGAGTCTGCTTTTGGAACGTCTTTATCTGCTAAGAATGATTTGAACTATTTTGGGATCACCTGG…
GCF_009893025.1	NZ_WXPB010000101.1223.AOI_01	119.2;Lactococcin_972_(Lcn972)	LATGGIAASAATEYPDGGTWNYGVGITGSYSDYFHGTKRHSATVKKGSDESYQAQGAGVWAKARLGAYSGCNFYYNYW	TTGGCTACTGGTGGTATCGCTGCCTCAGCAGCAACGGAATACCCTGATGGTGGTACATGGAATTATGGTGTCGGTATCACAGGTTCATATTCTGATTATTTCCATGGTACTAAACGCCACAGCGCTACTGTAAAAAAAGGTTCAGACGAATCTTATCAAGCTCAAGGGGCTGGAGTGTGGGCTAAGGCTCGTCTTGGCGCATATTCAGGATGTAATTTCTATTATAATTATTGG
GCF_009893025.1	NZ_WXPB010000181.1229.AOI_01	63.3;Enterolysin_A	MDKQVENVIKQQIKRRMKRRLFLWLFGTSGGLFLLGLVLALVLFIAFAAGVPDQSGGTVGDVTFTGEYSEGLPMYDEIKGRGPFSDEIAQYAVGAAVKYKLLPSVILSQYGYESAFGTSLSAKNDLNYFGITWFDGCLFPKGTARGVGGIEGGWYMKFPTSQAAFSYYGFMVATQSNFNACVGNKSPGADLLILGRGGYAAAGITEDSAYYQGCMSIIESNHLTEYDEFAIKHWGEGNSSNGTITGEWTNPFPGTSLDQSSFSGGQLFGTNPGGEFRPNGFHDGLDFGSVDHPGSEIHAVHSGTVTYVGNPGISQLGACVIVINYDGLNMVYQEFTNNGSNARVKVGDQVKVGQVIAIRDTEHLHLGFTRMDWLEAQGHGYTNDGTWIDPLPLLNSSGG…	ATGGATAAGCAAGTGGAAAATGTGATCAAGCAACAAATCAAGCGTCGTATGAAGCGGCGCTTATTTTTGTGGCTTTTTGGGACGTCTGGAGGCTTGTTTTTATTAGGGCTTGTTCTAGCACTTGTACTATTTATAGCTTTTGCAGCAGGAGTTCCTGATCAGTCCGGAGGCACGGTTGGTGACGTTACATTTACGGGTGAATATTCTGAAGGACTCCCAATGTATGACGAAATCAAAGGACGTGGCCCTTTTTCAGACGAAATAGCGCAATACGCAGTTGGTGCAGCAGTAAAATACAAATTATTACCCAGTGTCATTCTTTCGCAGTACGGCTATGAGTCTGCTTTTGGAACGTCTTTATCTGCTAAGAATGATTTGAACTATTTTGGGATCACCTGG…
GCF_009893025.1	NZ_WXPB010000261.1205.AOI_01	63.3;Enterolysin_A	MMGILFLFFGVDDSETSGSATGGAEFIGAYSEDLPSYPEIKGVGNVPDEIAQLAVGSAVKYHLLPSVIISQWAYESEWGHSQSAKTDNNFFGITWFEGCPFPKGTARGIGGSKGGNYMKFPNKKSAFSYYGYMVASQSNFNACVGNKSPSECLLILGRGGYATAGITESSPYFTGCMSIIQSNNLTQYDDFAIQKWKDFGSNTSGSVGGGWGWPFPEVGQGSFAGGQLFGKNPGGEFRENGFHDGLDFGSVDHPGNEIHAIHGGTVNYVGNPGISGLGACVIVINDSGLNMVYQEFATSTSNAKVKVGDKVKLGDVIGIRDTEHLHLGITKKDWLQAESSAFTDDGTWLDPLKIITTGKY	ATGATGGGGATTCTGTTTCTTTTCTTTGGCGTCGATGATTCTGAGACAAGTGGATCAGCTACTGGCGGAGCAGAATTTATTGGTGCTTATTCAGAAGATTTACCTTCTTATCCTGAGATCAAAGGAGTTGGAAATGTGCCTGATGAAATCGCCCAATTAGCGGTAGGTTCAGCTGTAAAATATCACTTGTTGCCAAGTGTGATTATTAGTCAGTGGGCGTATGAAAGTGAATGGGGGCATTCACAGTCTGCAAAGACTGATAATAATTTCTTTGGAATCACATGGTTTGAAGGCTGTCCGTTTCCTAAAGGTACCGCTCGAGGGATAGGCGGTTCAAAAGGTGGAAATTATATGAAGTTTCCGAATAAAAAATCAGCCTTTAGTTATTATGGCTATATG…

## Sheet: L_agilis
Assembly Accession	LOCUS	Bacteriocin (BAGEL4)	Sequences
GCF_012489675.1	NZ_BLAN010001301.1045.AOI_01	42.2;Bovicin_255_peptide	MAALLFFIKAAIRNSGYCKPVYYGANGYSCRYSNGKWDYKVTKTAAQAVGGVMAKGWIGSLGGSYYHPGYRGx	ATGGCTGCACTACTCTTTTTCATCAAAGCGGCAATCAGAAACTCAGGTTACTGTAAACCTGTATACTATGGAGCTAATGGATATTCTTGTAGATATAGTAACGGCAAGTGGGATTATAAAGTTACTAAAACAGCTGCGCAGGCTGTAGGTGGTGTCATGGCTAAAGGTTGGATTGGTTCTCTCGGAGGTTCTTACTACCATCCTGGTTATAGGGGGTAA
GCF_012490125.1	NZ_BLAR010000491.1241.AOI_01	166.2;Plantaricin_423	LLIAENFMSDKIENKKKLTKADLAKVTGGSRYYGNGVTCGKHKYTVNWGQAWTCGVNRLANFGHGNC	TTGCTTATAGCAGAAAATTTTATGAGTGATAAAATAGAAAACAAGAAGAAATTAACTAAAGCAGATTTAGCAAAGGTTACTGGTGGAAGTAGATATTATGGTAACGGTGTTACTTGTGGCAAACATAAGTACACAGTTAACTGGGGGCAAGCTTGGACTTGCGGAGTTAACCGCCTTGCCAACTTTGGTCATGGTAACTGC
GCF_910578315.1	NZ_CAJTQW0100000081.2328.AOI_01	43.2;Bovicin_255_variant	MILKKFLIGFVTIFTAFVILNIGNTASANSGYCKPVYYGANGYSCRYSNGKWDYKVTKTAAQAVGGVMVKGWIGSLGGSYYQPGYRG	ATGATTTTGAAAAAATTTCTTATTGGTTTTGTCACTATTTTCACTGCCTTTGTGATTTTAAATATCGGTAACACAGCATCTGCCAACTCGGGTTACTGTAAACCTGTATATTATGGAGCTAATGGATATTCTTGTAGATATAGTAACGGCAAGTGGGATTATAAAGTTACTAAAACAGCCGCGCAGGCTGTAGGTGGTGTCATGGTTAAAGGTTGGATTGGTTCTCTCGGAGGTTCTTACTACCAACCTGGTTATAGGGGG
GCF_944325915.1	NZ_CALVBX0100000051.2358.AOI_01	42.2;Bovicin_255_peptide	VAIRNSGYCKPVYYGANGYSCRYSNGKWDYKVTKTAAQAVGGVMAKGWIGSLGGSYYHPGYRGx	GTGGCAATCAGAAACTCAGGTTACTGTAAACCTGTATACTATGGAGCTAATGGATATTCTTGTAGATATAGTAACGGCAAGTGGGATTATAAAGTTACTAAAACAGCTGCGCAGGCTGTAGGTGGTGTCATGGCTAAAGGTTGGATTGGTTCTCTCGGAGGTTCTTACTACCATCCTGGTTATAGGGGGTAA
GCF_949299605.1	NZ_CASGBD0100000141.2438.AOI_01	42.2;Bovicin_255_peptide	MILKKFLIGFVTIFTAFVILNIGNTASANSGYCKPVYYGANGYSCRYGNGKWDYKVTKSAAQAVGGVMVKGWIGSLGGSYYHPGYRG	ATGATTTTGAAAAAATTTCTTATTGGTTTTGTCACTATTTTCACTGCCTTTGTGATTTTAAATATCGGTAACACAGCATCTGCCAACTCGGGTTACTGTAAACCTGTATACTATGGAGCTAATGGGTATTCCTGTAGATATGGTAACGGTAAGTGGGATTATAAAGTTACTAAATCAGCTGCGCAGGCTGTAGGTGGTGTCATGGTTAAAGGTTGGATTGGTTCTCTCGGAGGTTCTTACTATCATCCTGGTTATAGGGGG
GCF_949399295.1	NZ_CASLYV0100000461.2598.AOI_01	43.2;Bovicin_255_variant	MILKKFLIGFVTIFTAFVILNIGNTASANSGYCKPVYYGANGYSCRYSNGKWDYKVTKTAAQAVGGVMVKGWIGSLGGSYYQPGYRG	ATGATTTTGAAAAAATTTCTTATTGGTTTTGTCACTATTTTCACTGCCTTTGTGATTTTAAATATCGGTAACACAGCATCTGCCAACTCGGGTTACTGTAAACCTGTATATTATGGAGCTAATGGATATTCTTGTAGATATAGTAACGGCAAGTGGGATTATAAAGTTACTAAAACAGCCGCGCAGGCTGTAGGTGGTGTCATGGTTAAAGGTTGGATTGGTTCTCTCGGAGGTTCTTACTACCAACCTGGTTATAGGGGG
GCF_951800395.1	NZ_CATOHV0100000111.2671.AOI_01	43.2;Bovicin_255_variant	MILKKFLIGFVTIFTAFVILNIGNTASANSGYCKPVYYGANGYSCRYSNGKWDYKVTKTAAQAVGGVMVKGWIGSLGGSYYQPGYRG	ATGATTTTGAAAAAATTTCTTATTGGTTTTGTCACTATTTTCACTGCCTTTGTGATTTTAAATATCGGTAACACAGCATCTGCCAACTCGGGTTACTGTAAACCTGTATATTATGGAGCTAATGGATATTCTTGTAGATATAGTAACGGCAAGTGGGATTATAAAGTTACTAAAACAGCCGCGCAGGCTGTAGGTGGTGTCATGGTTAAAGGTTGGATTGGTTCTCTCGGAGGTTCTTACTACCAACCTGGTTATAGGGGG
GCF_002240375.2	NZ_CP0167661.767.AOI_01	42.2;Bovicin_255_peptide	MAALLFFIKAAIRNSGYCEPVYYGANGYSCRYSNGKWDYKVTKTAAQAVGGVMAKGWIGSLGGSYYQPGYRG	ATGGCTGCACTACTCTTTTTCATCAAAGCGGCAATCAGAAACTCAGGTTACTGTGAACCTGTATACTATGGAGCTAATGGATATTCTTGTAGATATAGTAACGGCAAGTGGGATTATAAAGTTACTAAAACAGCTGCGCAGGCTGTAGGTGGTGTCATGGCTAAAGGGTGGATTGGTTCTCTCGGAGGTTCTTACTACCAACCTGGTTATAGGGGG
GCF_012843665.1	NZ_JABAFP0100000301.1352.AOI_01	42.2;Bovicin_255_peptide	MAALLFFIKAAIRNSGYCKPVYYGANGYSCRYSNGKWDYKVTKTAAQAVGGVMAKGWIGSLGGSYYHPGYRGx	ATGGCTGCACTACTCTTTTTCATCAAAGCGGCAATCAGAAACTCAGGTTACTGTAAACCTGTATACTATGGAGCTAATGGATATTCTTGTAGATATAGTAACGGCAAGTGGGATTATAAAGTTACTAAAACAGCTGCGCAGGCTGTAGGTGGTGTCATGGCTAAAGGTTGGATTGGTTCTCTCGGAGGTTCTTACTACCATCCTGGTTATAGGGGGTAA
GCF_012843665.1	NZ_JABAFP0100000401.1306.AOI_01	272.1;Enterocin_Nkr-5-3B	MRKFISKRRIYLLLLGVVTLTVLLPTTLDSSYLAAQFGISTYASKKIIDIAAGAGSVWAVIAVVGGSAGWGTVILAAAKALIKRYGRAAAASW	ATGAGAAAATTTATTAGTAAAAGAAGAATTTATCTATTATTACTGGGAGTCGTTACACTTACAGTGTTGCTCCCCACCACGCTAGACAGCTCTTATTTAGCTGCACAATTTGGCATATCTACATATGCATCAAAAAAGATAATTGATATAGCCGCCGGAGCTGGATCAGTATGGGCCGTTATTGCAGTAGTAGGTGGTAGTGCTGGTTGGGGAACTGTAATTTTAGCAGCTGCTAAAGCGTTAATAAAGCGTTACGGTAGAGCAGCAGCAGCAAGTTGG
GCF_016900275.1	NZ_JACJJZ0100000111.1437.AOI_01	43.2;Bovicin_255_variant	MILKKFLIGFVTIFTAFVILNIGNTASANSGYCKPVYYGANGYSCRYSNGKWDYKVTKTAAQAVGGVMVKGWIGSLGGSYYQPGYRG	ATGATTTTGAAAAAATTTCTTATTGGTTTTGTCACTATTTTCACTGCCTTTGTGATTTTAAATATCGGTAACACAGCATCTGCCAACTCGGGTTACTGTAAACCTGTATATTATGGAGCTAATGGATATTCTTGTAGATATAGTAACGGCAAGTGGGATTATAAAGTTACTAAAACAGCCGCGCAGGCTGTAGGTGGTGTCATGGTTAAAGGTTGGATTGGTTCTCTCGGAGGTTCTTACTACCAACCTGGTTATAGGGGG
GCF_022768165.1	NZ_JALEMO0100000521.1605.AOI_01	109.1;SalivaricinA	LTFFVLNIDETSSIYISADDNKLKYYMEVYFMENTQNKDTFVEELSETELEMVSGGRKGKGWLASITDDCPNSVIVCC	TTGACATTTTTTGTGTTGAATATTGATGAAACGAGTAGTATATACATATCAGCTGATGATAATAAGCTGAAATATTATATGGAGGTGTATTTCATGGAAAATACACAAAACAAAGACACATTTGTCGAAGAATTATCAGAAACAGAATTAGAAATGGTTTCTGGTGGACGAAAGGGTAAAGGTTGGTTAGCATCAATTACAGATGATTGTCCTAATTCAGTAATTGTTTGCTGT
GCF_027723985.1	NZ_JAQDSU0100000021.2014.AOI_01	43.2;Bovicin_255_variant	MILKKFLIGFVTIFTAFVILNIGNTASANSGYCKPVYYGANGYSCRYSNGKWDYKVTKSAAQAVGGVMVKGWIGSLGGSYYQPGYRG	ATGATTTTGAAAAAATTTCTTATTGGTTTTGTCACCATTTTCACCGCCTTTGTGATTTTAAATATCGGTAACACAGCATCTGCCAACTCGGGTTACTGTAAACCTGTATACTATGGAGCTAATGGGTATTCCTGTAGATATAGTAACGGTAAGTGGGATTATAAAGTTACTAAATCAGCTGCGCAGGCTGTAGGTGGTGTCATGGTTAAAGGTTGGATTGGTTCTCTCGGAGGTTCTTACTACCAACCTGGTTATAGGGGC
GCF_027723985.1	NZ_JAQDSU0100000111.2024.AOI_01	166.2;Plantaricin_423	MSDKMENKKKLTTADLAKVTGGSRYYGNGITCGKHKCTVNWGQAWTCGVNRLANFGHGNC	ATGAGTGATAAAATGGAAAACAAGAAGAAATTAACTACAGCAGATTTAGCAAAGGTTACTGGTGGAAGTAGATATTATGGTAACGGTATTACTTGTGGCAAACATAAGTGCACAGTTAACTGGGGGCAAGCTTGGACTTGCGGAGTTAACCGCCTTGCCAACTTTGGTCATGGTAACTGC
GCF_027724045.1	NZ_JAQDSV0100000011.2111.AOI_01	43.2;Bovicin_255_variant	MILKKFLIGFVTIFTAFVILNIGNTASANSGYCKPVYYGANGYSCRYSNGKWDYKVTKSAAQAVGGVMVKGWIGSLGGSYYQPGYRG	ATGATTTTGAAAAAATTTCTTATTGGTTTTGTCACCATTTTCACCGCCTTTGTGATTTTAAATATCGGTAACACAGCATCTGCCAACTCGGGTTACTGTAAACCTGTATACTATGGAGCTAATGGGTATTCCTGTAGATATAGTAACGGTAAGTGGGATTATAAAGTTACTAAATCAGCTGCGCAGGCTGTAGGTGGTGTCATGGTTAAAGGTTGGATTGGTTCTCTCGGAGGTTCTTACTACCAACCTGGTTATAGGGGC
GCF_027724045.1	NZ_JAQDSV0100000131.2079.AOI_01	166.2;Plantaricin_423	LLIAENFMSDKMENKKKLTTADLAKVTGGSRYYGNGITCGKHKCTVNWGQAWTCGVNRLANFGHGNC	TTGCTTATAGCAGAAAATTTTATGAGTGATAAAATGGAAAACAAGAAGAAATTAACTACAGCAGATTTAGCAAAGGTTACTGGTGGAAGTAGATATTATGGTAACGGTATTACTTGTGGCAAACATAAGTGCACAGTTAACTGGGGGCAAGCTTGGACTTGCGGAGTTAACCGCCTTGCCAACTTTGGTCATGGTAACTGC
GCF_027675105.1	NZ_JAQDTR0100000011.1998.AOI_01	43.2;Bovicin_255_variant	MILKKFLIGFVTIFTAFVILNIGNTASANSGYCKPVYYGANGYSCRYSNGKWDYKVTKSAAQAVGGVMVKGWIGSLGGSYYQPGYRG	ATGATTTTGAAAAAATTTCTTATTGGTTTTGTCACCATTTTCACCGCCTTTGTGATTTTAAATATCGGTAACACAGCATCTGCCAACTCGGGTTACTGTAAACCTGTATACTATGGAGCTAATGGGTATTCCTGTAGATATAGTAACGGTAAGTGGGATTATAAAGTTACTAAATCAGCTGCGCAGGCTGTAGGTGGTGTCATGGTTAAAGGTTGGATTGGTTCTCTCGGAGGTTCTTACTACCAACCTGGTTATAGGGGC
GCF_027675105.1	NZ_JAQDTR0100000161.1997.AOI_01	166.2;Plantaricin_423	LLIAENFMSDKMENKKKLTTADLAKVTGGSRYYGNGITCGKHKCTVNWGQAWTCGVNRLANFGHGNC	TTGCTTATAGCAGAAAATTTTATGAGTGATAAAATGGAAAACAAGAAGAAATTAACTACAGCAGATTTAGCAAAGGTTACTGGTGGAAGTAGATATTATGGTAACGGTATTACTTGTGGCAAACATAAGTGCACAGTTAACTGGGGGCAAGCTTGGACTTGCGGAGTTAACCGCCTTGCCAACTTTGGTCATGGTAACTGC
GCF_027675035.1	NZ_JAQDTS0100000021.1922.AOI_01	43.2;Bovicin_255_variant	MILKKFLIGFVTIFTAFVILNIGNTASANSGYCKPVYYGANGYSCRYSNGKWDYKVTKSAAQAVGGVMVKGWIGSLGGSYYQPGYRG	ATGATTTTGAAAAAATTTCTTATTGGTTTTGTCACCATTTTCACCGCCTTTGTGATTTTAAATATCGGTAACACAGCATCTGCCAACTCGGGTTACTGTAAACCTGTATACTATGGAGCTAATGGGTATTCCTGTAGATATAGTAACGGTAAGTGGGATTATAAAGTTACTAAATCAGCTGCGCAGGCTGTAGGTGGTGTCATGGTTAAAGGTTGGATTGGTTCTCTCGGAGGTTCTTACTACCAACCTGGTTATAGGGGC
GCF_027675035.1	NZ_JAQDTS0100000161.1900.AOI_01	166.2;Plantaricin_423	LLIAENFMSDKMENKKKLTTADLAKVTGGSRYYGNGITCGKHKCTVNWGQAWTCGVNRLANFGHGNC	TTGCTTATAGCAGAAAATTTTATGAGTGATAAAATGGAAAACAAGAAGAAATTAACTACAGCAGATTTAGCAAAGGTTACTGGTGGAAGTAGATATTATGGTAACGGTATTACTTGTGGCAAACATAAGTGCACAGTTAACTGGGGGCAAGCTTGGACTTGCGGAGTTAACCGCCTTGCCAACTTTGGTCATGGTAACTGC
GCF_027674985.1	NZ_JAQDTV0100000011.1825.AOI_01	43.2;Bovicin_255_variant	MILKKFLIGFVTIFTAFVILNIGNTASANSGYCKPVYYGANGYSCRYSNGKWDYKVTKSAAQAVGGVMVKGWIGSLGGSYYQPGYRG	ATGATTTTGAAAAAATTTCTTATTGGTTTTGTCACCATTTTCACCGCCTTTGTGATTTTAAATATCGGTAACACAGCATCTGCCAACTCGGGTTACTGTAAACCTGTATACTATGGAGCTAATGGGTATTCCTGTAGATATAGTAACGGTAAGTGGGATTATAAAGTTACTAAATCAGCTGCGCAGGCTGTAGGTGGTGTCATGGTTAAAGGTTGGATTGGTTCTCTCGGAGGTTCTTACTACCAACCTGGTTATAGGGGC
GCF_027674985.1	NZ_JAQDTV0100000151.1790.AOI_01	166.2;Plantaricin_423	LLIAENFMSDKMENKKKLTTADLAKVTGGSRYYGNGITCGKHKCTVNWGQAWTCGVNRLANFGHGNC	TTGCTTATAGCAGAAAATTTTATGAGTGATAAAATGGAAAACAAGAAGAAATTAACTACAGCAGATTTAGCAAAGGTTACTGGTGGAAGTAGATATTATGGTAACGGTATTACTTGTGGCAAACATAAGTGCACAGTTAACTGGGGGCAAGCTTGGACTTGCGGAGTTAACCGCCTTGCCAACTTTGGTCATGGTAACTGC
GCF_027674925.1	NZ_JAQDUA0100000021.1755.AOI_01	43.2;Bovicin_255_variant	MILKKFLIGFVTIFTAFVILNIGNTASANSGYCKPVYYGANGYSCRYSNGKWDYKVTKSAAQAVGGVMVKGWIGSLGGSYYQPGYRG	ATGATTTTGAAAAAATTTCTTATTGGTTTTGTCACCATTTTCACCGCCTTTGTGATTTTAAATATCGGTAACACAGCATCTGCCAACTCGGGTTACTGTAAACCTGTATACTATGGAGCTAATGGGTATTCCTGTAGATATAGTAACGGTAAGTGGGATTATAAAGTTACTAAATCAGCTGCGCAGGCTGTAGGTGGTGTCATGGTTAAAGGTTGGATTGGTTCTCTCGGAGGTTCTTACTACCAACCTGGTTATAGGGGC
GCF_027674925.1	NZ_JAQDUA0100000151.1739.AOI_01	166.2;Plantaricin_423	LLIAENFMSDKMENKKKLTTADLAKVTGGSRYYGNGITCGKHKCTVNWGQAWTCGVNRLANFGHGNC	TTGCTTATAGCAGAAAATTTTATGAGTGATAAAATGGAAAACAAGAAGAAATTAACTACAGCAGATTTAGCAAAGGTTACTGGTGGAAGTAGATATTATGGTAACGGTATTACTTGTGGCAAACATAAGTGCACAGTTAACTGGGGGCAAGCTTGGACTTGCGGAGTTAACCGCCTTGCCAACTTTGGTCATGGTAACTGC
GCF_002218605.1	NZ_LYQO010000351.176.AOI_01	153.2;MR10B	MSALAKLIAKFGYKKIMQLIGEGWTVNQIEKMFKx	ATGTCAGCTTTAGCAAAACTTATTGCAAAATTTGGTTACAAAAAGATTATGCAACTAATCGGTGAAGGATGGACAGTTAACCAAATCGAAAAAATGTTTAAATAA
GCF_002218575.1	NZ_LYQP010000241.118.AOI_01	153.2;MR10B	MSALAKLIAKFGYKKIMQLIGEGWTVNQIEKMFKx	ATGTCAGCTTTAGCAAAACTTATTGCAAAATTTGGTTACAAAAAGATTATGCAACTAATCGGTGAAGGATGGACAGTTAACCAAATCGAAAAAATGTTTAAATAA
GCF_012027835.1	NZ_SJOY010000041.884.AOI_01	153.2;MR10B	MSALAKLIAKFGYKKIMQLIGEGWTVNQIEKMFKx	ATGTCAGCTTTAGCAAAACTTATTGCAAAATTTGGTTACAAAAAGATTATGCAACTAATCGGTGAAGGATGGACAGTTAACCAAATCGAAAAAATGTTTAAATAA

## Sheet: L_reuteri
Assembly Accession	LOCUS	Bacteriocin (BAGEL4)	Sequences
GCF_000016825.1	NC_0095131.1.AOI_01	63.3;Enterolysin_A	MSEFVWLTNGISNKLATEARKADWQDMHTSFKANFQLSSAYEISFTLTYTEQYKDAFNLVKEKRYVNYRGHDYLIQQVEAKHDENGLATLQVTATHRLIDAMKDIVLYSTIPTEGNPEVSGGGSSDSGDGDSGDPQPGIVTKQTAVQQTYPLNERLDHFFNPNEWGITYKLHGNFPQAAVDCTGSLYEWLNSNLKLFGAYWKPDSDMVVGIYDLESLKKPTNKVFRYLHDMSNVDIQSDATNLINDVWVYGGKMEKDITSVLGPGGQTNGATEPQNGDWTPVIQNAASLIGEKLSDADIANIKNRIRIESNGNETIQNNWDSNAQAGHPSIGLVQFIQSTFDYYCRPPYTDIRKGLDQLIAMMNIPNWRQQIAGSGGWSPHGAPISKATIDIKSVVDNS…	ATGAGTGAGTTTGTATGGCTAACTAACGGAATTAGTAATAAGCTGGCAACGGAAGCACGTAAAGCCGATTGGCAGGATATGCACACATCATTTAAGGCTAATTTTCAGTTGAGTTCAGCTTATGAAATCTCATTTACACTAACTTATACCGAGCAATATAAAGATGCTTTTAATCTAGTCAAAGAAAAACGCTATGTAAATTATCGTGGTCATGATTACCTAATCCAGCAAGTGGAAGCCAAACATGATGAAAATGGATTGGCTACCCTGCAAGTAACGGCTACTCATCGGCTAATTGATGCTATGAAAGATATAGTCCTTTATTCAACAATTCCGACAGAAGGAAATCCTGAGGTTAGCGGTGGCGGTAGTAGTGATTCTGGAGATGGTGATAGTGGT…
GCF_000010005.1	NC_0106091.0.AOI_01	63.3;Enterolysin_A	MSEFVWLTNGISNKLATEARKADWQDMHTSFKANFQLSSAYEISFTLTYTEQYKDAFNLVKEKRYVNYRGHDYLIQQVEAKHDENGLATLQVTATHRLIDAMKDIVLYSTIPTEGNPEVSGGGSSDSGDGDSGDPQPGIVTKQTAVQQTYPLNERLDHFFNPNEWGITYKLHGNFPQAAVDCTGSLYEWLNSNLKLFGAYWKPDSDMVVGIYDLESLKKPTNKVFRYLHDMSNVDIQSDATNLINDVWVYGGKMEKDITSVLGPGGQTNGATEPQNGDWTPVIQNAASLIGEKLSDADIANIKNRIRIESNGNETIQNNWDSNAQAGHPSIGLVQFIQSTFDYYCRPPYTDIRKGLDQLIAMMNIPNWRQQIAGSGGWSPHGAPISKATIDIKSVVDNS…	ATGAGTGAGTTTGTATGGCTAACTAACGGAATTAGTAATAAGCTGGCAACGGAAGCACGTAAAGCCGATTGGCAGGATATGCACACATCATTTAAGGCTAATTTTCAGTTGAGTTCAGCTTATGAAATCTCATTTACACTAACTTATACCGAGCAATATAAAGATGCTTTTAATCTAGTCAAAGAAAAACGCTATGTAAATTATCGTGGTCATGATTACCTAATCCAGCAAGTGGAAGCCAAACATGATGAAAATGGATTGGCTACCCTGCAAGTAACGGCTACTCATCGGCTAATTGATGCTATGAAAGATATAGTCCTTTATTCAACAATTCCGACAGAAGGAAATCCTGAGGTTAGCGGTGGCGGTAGTAGTGATTCTGGAGATGGTGATAGTGGT…
GCF_000159455.2	NC_0156971.6.AOI_01	64.3;Enterolysin_A	MEDKLIFKPSHLKSKVLSTLTVCGGALFLLSGNAAADDQTNDVQQPVTPQQTTNEQPNTSTVDVQTPNTYNGVAVSPQASETTQNTENYNVVPTQDNNQEVQHKEATQPQNPNNYGYLDSVSLSNNELQVSGWQATNQAADKPYHYVIAYDNTANTELGRQQVENVSRPDVAQAYPDATNADTSGFNSTIKLNTTNEDYTNHSISVVSRYSDATNGEGNHVDYWYPAFTFDQGNHAWLDDMHTENDQLHISGWNATNQATNKDYHYVILYDTTKGHELSRQLVDETTSQRPDVQKAYSNVNNAGKSGFNVTFDLSKLFFDASDQLQVISRYSNAENGEGDRVDYWFAPTSRENQGYLDSANFSNGQLVVNGWHANDASTIAPNHFLILFDQTAKKQAGV…	ATGGAGGACAAGCTTATTTTTAAACCTAGTCATTTAAAATCAAAAGTTTTATCTACTCTTACTGTATGTGGAGGAGCTTTATTCCTGTTAAGTGGAAATGCTGCTGCTGATGATCAAACAAATGATGTTCAACAACCAGTTACTCCTCAACAAACAACTAATGAACAACCAAATACATCTACGGTTGATGTACAAACACCAAATACATATAACGGAGTAGCAGTTAGTCCACAAGCTAGTGAAACTACTCAAAATACGGAAAATTATAATGTTGTTCCAACGCAGGACAATAATCAAGAAGTACAACATAAAGAAGCAACTCAACCACAAAATCCCAACAATTATGGTTATTTAGATTCAGTTAGCTTATCAAACAACGAGTTGCAAGTTAGTGGTTGG…
GCF_000410995.1	NC_0214941.191.AOI_01	64.3;Enterolysin_A	MEDKLIFKPSHLKSKVLSTLTVCGGALFLLSGNAAADDQTTDVQQPVTPQQTTNEQPNTSTVDVQTPNTYNGVAVSPQASETTQNTENYNVVPTQDNNQEVQHKEATQPQNPNNYGYLNSVSLSNNELQVSGWQATNQAADKPYHYVIAYDNTVNAELGRQQVENVSRPDVAQAYPDATNADNSGFNSTIKLNTTNEDYTNHSISVISRYSDATNGEGNHVDYWYPAFTFDQGNYAWLDDMHTENDQLHVSGWNATNQANNKDYHYVILYDTTKGRELSRQLVDETASQRPDVQKAYSNVNNAGKSGFNVTFDLSKLSFDASDQLQVISRYSNAENGEGDRVDYWFAPTSRENQGYLDSANFSNGQLVVNGWHANDASTIAPNHFLILFDQTAKKQAGV…	ATGGAGGACAAGCTTATTTTTAAACCTAGTCATTTAAAATCAAAAGTTTTATCTACTCTTACTGTATGTGGAGGAGCTTTATTCCTGTTAAGTGGGAATGCTGCTGCTGATGATCAAACAACTGATGTTCAACAACCAGTTACTCCTCAACAAACAACTAATGAACAACCAAATACATCCACGGTTGATGTACAAACACCAAATACATATAACGGAGTAGCAGTTAGTCCACAAGCTAGTGAAACTACTCAAAATACAGAAAATTATAATGTTGTTCCAACGCAGGACAATAATCAAGAAGTACAACATAAAGAAGCAACTCAACCACAAAATCCCAACAATTATGGTTATTTAAATTCAGTTAGTTTATCAAACAACGAGTTGCAAGTTAGTGGTTGG…
GCF_000439275.1	NC_0218721.195.AOI_01	64.3;Enterolysin_A	MEDKLIFKPSHLKSKVLSTLTVCGGALFLLSGNAAADDQTTDVQQPVTPQQTTNEQPNTSTVDVQTPNTYNGVAVSPQASETTQNTENYNVVPTQDNNQEVQHKEATQPQNPNNYGYLDSVSLSNNELQVSGWQATNQAADKPYHYVIAYDNTVNAELGRQQVENVSRPDVAQAYPDATNADNSGFNSTIKLNTTNEDYTNHSISVISRYSDATNGEGNHVDYWYPAFTFDQGNYAWLDDMHTENDQLHVSGWNATNQANNKDYHYVILYNKTKGHELSRQLVDEKNSQRPDVQKVYQNVNNATKSGFNVTFDLSKLSFDASDQLQVISRYSDAQNGEGNRVDFWFAPTSRENQGNLDSANFSNGQLVVNGWHANDASTIAPNHFLILFDRTANKQVAS…	ATGGAGGACAAGCTTATTTTTAAACCTAGTCATTTAAAATCAAAAGTTTTATCTACTCTTACTGTGTGTGGAGGAGCTTTATTCCTGTTAAGTGGGAATGCTGCTGCTGATGATCAAACAACTGATGTTCAACAACCAGTTACTCCTCAACAAACAACTAATGAACAACCAAATACATCCACGGTTGATGTACAAACACCAAATACATATAACGGAGTAGCAGTTAGTCCACAAGCTAGTGAAACTACTCAAAATACAGAAAATTATAATGTTGTTCCAACGCAGGACAATAATCAAGAAGTACAACATAAAGAAGCAACTCAACCACAAAATCCCAACAATTATGGTTATTTAGATTCAGTTAGTTTATCAAACAACGAGTTGCAAGTTAGTGGTTGG…
GCF_000168255.1	NZ_AAPZ020000011.63.AOI_01	64.3;Enterolysin_A	MEDKLIFKPSHLKSKVLSTLTVCGGALFLLSGNAAADDQTTDVQQPVTPQQTTNEQPNTSTIDVQTPNTYNGVAVSPQASEATQNTENYNVVPTQDNNQEVQHKEATQPQNPNNYGYLDSVSLSNNELQVSGWQATNQAADKPYHYVIAYDNTVNAELGRQQVENVSRPDVAQAYPDATNADNSGFNSTIKLNTTNEDYTNHSISVISRYSDATNGEGNHVDYWYPAFTFDQGNYAWLDDMHTENDQLHVSGWNATNQANNKDYHYVILYDTTKGHELSRQLVNETASQRPDVQKAYSNVNNAGKSGFNVTFDLSKLSFDASDQLQVISRYSNAENGEGDRVDYWFAPTSRENQGYLDSANFSNGQLVVNGWHANDASTIAPNHFLILFDQTAKKQAGV…	ATGGAGGACAAGCTTATTTTTAAACCTAGTCATTTAAAATCAAAAGTTTTATCTACTCTTACTGTATGTGGAGGAGCTTTATTCCTGTTAAGTGGGAATGCTGCTGCTGATGATCAAACAACTGATGTTCAACAACCAGTTACTCCTCAACAAACAACTAATGAACAACCAAATACATCCACAATTGATGTACAAACACCAAATACATATAACGGAGTAGCAGTTAGTCCACAAGCTAGTGAAGCTACTCAAAATACAGAAAATTATAATGTTGTTCCAACGCAGGACAATAATCAAGAAGTACAACATAAAGAAGCAACTCAACCACAAAATCCCAACAATTATGGTTATTTAGATTCAGTTAGTTTATCAAACAACGAGTTGCAAGTTAGTGGTTGG…
GCF_000159475.2	NZ_ACGX020000061.12.AOI_01	63.3;Enterolysin_A	MSEFVWLTNGISNKLATEARKADWQDMHTSFKANFQLSSAYEISFTLTYTEQYKDAFNLVKEKRYVNYRGHDYLIQQVEAKHDENGLATLQVTATHRLIDAMKDIVLYSTIPTEGNPEVSGGGSSDSGDGDSGDPQPGIVTKQTAVQQTYPLNERLDHFFNPNEWGITYKLHGNFPQAAVDCTGSLYEWLNSNLKLFGAYWKPDSDMVVGIYDLESLKKPTNKVFRYLHDMSNVDIQSDATNLINDVWVYGGKMEKDITSVLGPGGQTNGATEPQNGDWTPVIQNAASLIGEKLSDADIANIKNRIRIESNGNETIQNNWDSNAQAGHPSIGLVQFIQSTFDYYCRPPYTDIRKGLDQLIAMMNIPNWRQQIAGSGGWSPHGAPISKATIDIKSVVDNS…	ATGAGTGAGTTTGTATGGCTAACTAACGGAATTAGTAATAAGCTGGCAACGGAAGCACGTAAAGCCGATTGGCAGGATATGCACACATCATTTAAGGCTAATTTTCAGTTGAGTTCAGCTTATGAAATCTCATTTACACTAACTTATACCGAGCAATATAAAGATGCTTTTAATCTAGTCAAAGAAAAACGCTATGTAAATTATCGTGGTCATGATTACCTAATCCAGCAAGTGGAAGCCAAACATGATGAAAATGGATTGGCTACCCTGCAAGTAACGGCTACTCATCGGCTAATTGATGCTATGAAAGATATAGTCCTTTATTCAACAATTCCGACAGAAGGAAATCCTGAGGTTAGCGGTGGCGGTAGTAGTGATTCTGGAGATGGTGATAGTGGT…
GCF_000179435.1	NZ_AEAW010000011.101.AOI_01	7.2;Acidocin_LF221B(GassericinK7B)	MKQLKYNQLELIIGGNRWGNATIGAMNGAKYGVKLCRPGGPWAMGGCGLVGAGIGGYVGYRF	ATGAAACAATTAAAATACAACCAATTAGAACTTATTATCGGCGGGAATCGTTGGGGAAATGCAACAATCGGCGCAATGAATGGTGCCAAATATGGAGTGAAACTTTGCCGTCCTGGTGGTCCATGGGCCATGGGAGGATGTGGTCTTGTTGGTGCTGGCATCGGCGGCTATGTTGGATATCGTTTC
GCF_001434615.1	NZ_AZDD010000301.311.AOI_01	63.3;Enterolysin_A	MSEFVWLTNGISNKLATEARKADWQDMHTSFKANFQLSSAYEISFTLTYTEQYKDAFNLVKEKRYVNYRGHDYLIQQVEAKHDENGLATLQVTATHRLIDAMKDIVLYSTIPTEGNPEVSGGGSSDSGDGDSGDPQPGIVTKQTAVQQTYPLNERLDHFFNPNEWGITYKLHGNFPQAAVDCTGSLYEWLNSNLKLFGAYWKPDSDMVVGIYDLESLKKPTNKVFRYLHDMSNVDIQSDATNLINDVWVYGGKMEKDITSVLGPGGQTNGATEPQNGDWTPVIQNAASLIGEKLSDADIANIKNRIRIESNGNETIQNNWDSNAQAGHPSIGLVQFIQSTFDYYCRPPYTDIRKGLDQLIAMMNIPNWRQQIAGSGGWSPHGAPISKATIDIKSVVDNS…	ATGAGTGAGTTTGTATGGCTAACTAACGGAATTAGTAATAAGCTGGCAACGGAAGCACGTAAAGCCGATTGGCAGGATATGCACACATCATTTAAGGCTAATTTTCAGTTGAGTTCAGCTTATGAAATCTCATTTACACTAACTTATACCGAGCAATATAAAGATGCTTTTAATCTAGTCAAAGAAAAACGCTATGTAAATTATCGTGGTCATGATTACCTAATCCAGCAAGTGGAAGCCAAACATGATGAAAATGGATTGGCTACCCTGCAAGTAACGGCTACTCATCGGCTAATTGATGCTATGAAAGATATAGTCCTTTATTCAACAATTCCGACAGAAGGAAATCCTGAGGTTAGCGGTGGCGGTAGTAGTGATTCTGGAGATGGTGATAGTGGT…
GCF_910574215.1	NZ_CAJSZG0100000091.26517.AOI_01	64.3;Enterolysin_A	LKRKTRIHLWSIIISIVGVITLLLFAVSLIIAMLVGSDEGCDSSIDTATISAGGISNGNWKDKNSAEYKAAKTIFETLTKKMGFSGAGAAGAVGNAIGESGLDVWKPNGVGYNGLFQWSQNQRLIAGGIIKSVDPSELTLDNEIKLMQYELNHGYTKVKTSVGKATDVHQATWNWFIDYEGMAGNENQYGQQRDPGAQWAYQEFGGSNISSNDSLLNGAAATADTGVAQDQQNNACNTDGGDTASGKWGWPFKTIPKDGPTRYENGQQYGHTGMIRGGGNDFHDGYDFGSAIVGAGQPILAVHDGKVFKVANDVGWWYVWVKSSDGYNEVYQEAFNSRGDITVNEGDEIKVGDKIGTLSGSHLHLGITKKAITSSVQSGYSDDGTWLDPIKIIKEGINN	TTGAAAAGGAAGACTAGAATTCATCTTTGGAGCATTATTATTTCGATTGTAGGAGTTATTACTTTATTATTATTTGCAGTTTCCTTAATTATTGCGATGCTAGTAGGTAGCGACGAAGGCTGTGATAGTAGTATTGATACCGCAACAATTTCGGCTGGCGGTATTAGTAATGGAAATTGGAAGGATAAAAATTCAGCTGAGTATAAGGCAGCAAAGACTATTTTTGAAACCTTAACTAAAAAGATGGGCTTTAGCGGTGCTGGCGCAGCAGGAGCGGTCGGTAATGCAATAGGTGAATCGGGACTTGATGTTTGGAAGCCAAATGGAGTTGGTTATAATGGCTTATTTCAGTGGAGTCAAAATCAACGCCTAATTGCTGGTGGAATTATTAAGAGCGTA…
GCF_910574215.1	NZ_CAJSZG0100000261.26531.AOI_01	64.3;Enterolysin_A	MEDKLIFKPSHLKSKVLSTLTVCGGALFLLSGNAAADDQTTDVQQPVTPQQTTNEQPNTSTVDVQTPNTYNGVAVSPQASETTQNTENYNVVPTQDNNQEVQHKEATQPQNPNNYGYLDSVSLSNNELQVSGWQATNQAADKPYHYVIAYDNTVNAELGRQQVENVSRPDVAQAYPDATNADNSGFNSTIKLNTTNEDYTNHSISVISRYSDATNGEGNHVDYWYPAFTFDQGNYAWLDDMHTENDQLHVSGWNATNQANNKDYHYVILYDTTKGHELSRQLVDETASQRPDVQKAYSNVNNAGKSGFNVTFDLSKLSFDASDQLQIISRYSNAENGEGDRVDYWFAPTSRENQGYLDSANFSNGQLVVNGWHANDASTIAPNHFLILFDQTAKKQAGV…	ATGGAGGACAAGCTTATTTTTAAACCTAGTCATTTAAAATCAAAAGTTTTATCTACTCTTACTGTATGTGGAGGAGCTTTATTCCTGTTAAGCGGAAATGCTGCTGCTGATGATCAAACAACTGATGTTCAACAACCAGTTACTCCTCAACAAACAACTAATGAACAACCAAATACATCCACAGTTGATGTACAAACACCAAATACATATAACGGAGTAGCAGTTAGTCCACAAGCTAGTGAAACTACTCAAAATACAGAAAATTATAATGTTGTTCCAACGCAGGACAATAATCAAGAAGTACAACATAAAGAAGCAACTCAACCACAAAATCCCAACAATTATGGTTATTTAGATTCAGTTAGTTTATCAAACAACGAGTTGCAAGTTAGTGGTTGG…
GCF_910574445.1	NZ_CAJSZW0100000101.26563.AOI_01	64.3;Enterolysin_A	LKRKTRIHLWSIIISIVGVITLLLFAVSLIIAMLVGSDEGCDSSIDTATISAGGISNGNWKDKNSAEYKAAKTIFETLTKKMGFSGAGAAGAVGNAIGESGLDVWKPNGVGYNGLFQWSQNQRLIAGGIIKSVDPSELTLDNEIKLMQYELNHGYTKVKTSVGKATDVHQATWNWFIDYEGMAGNENQYGQQRDPGAQWAYQEFGGSNISSNDSLLNGAAATADTGVAQDQQNNACNTDGGDTASGKWGWPFKTIPKDGPTRYENGQQYGHTGMIRGGGNDFHDGYDFGSAIVGAGQPILAVHDGKVFKVANDVGWWYVWVKSSDGYNEVYQEAFNSRGDITVNEGDEIKVGDKIGTLSGSHLHLGITKKAITSSVQSGYSDDGTWLDPIKIIKEGINN	TTGAAAAGGAAGACTAGAATTCATCTTTGGAGCATTATTATTTCGATTGTAGGAGTTATTACTTTATTATTATTTGCAGTTTCCTTAATTATTGCGATGCTAGTAGGTAGCGACGAAGGCTGTGATAGTAGTATTGATACCGCAACAATTTCGGCTGGCGGTATTAGTAATGGAAATTGGAAGGATAAAAATTCAGCTGAGTATAAGGCAGCAAAGACTATTTTTGAAACCTTAACTAAAAAGATGGGCTTTAGCGGTGCTGGCGCAGCAGGAGCGGTCGGTAATGCAATAGGTGAATCGGGACTTGATGTTTGGAAGCCAAATGGAGTTGGTTATAATGGCTTATTTCAGTGGAGTCAAAATCAACGCCTAATTGCTGGTGGAATTATTAAGAGCGTA…
GCF_910574445.1	NZ_CAJSZW0100000261.26606.AOI_01	64.3;Enterolysin_A	MEDKLIFKPSHLKSKVLSTLTVCGGALFLLSGNAAADDQTTDVQQPVTPQQTTNEQPNTSTVDVQTPNTYNGVAVSPQASETTQNTENYNVVPTQDNNQEVQHKEATQPQNPNNYGYLDSVSLSNNELQVSGWQATNQAADKPYHYVIAYDNTVNAELGRQQVENVSRPDVAQAYPDATNADNSGFNSTIKLNTTNEDYTNHSISVISRYSDATNGEGNHVDYWYPAFTFDQGNYAWLDDMHTENDQLHVSGWNATNQANNKDYHYVILYDTTKGHELSRQLVDETASQRPDVQKAYSNVNNAGKSGFNVTFDLSKLSFDASDQLQIISRYSNAENGEGDRVDYWFAPTSRENQGYLDSANFSNGQLVVNGWHANDASTIAPNHFLILFDQTAKKQAGV…	ATGGAGGACAAGCTTATTTTTAAACCTAGTCATTTAAAATCAAAAGTTTTATCTACTCTTACTGTATGTGGAGGAGCTTTATTCCTGTTAAGCGGAAATGCTGCTGCTGATGATCAAACAACTGATGTTCAACAACCAGTTACTCCTCAACAAACAACTAATGAACAACCAAATACATCCACAGTTGATGTACAAACACCAAATACATATAACGGAGTAGCAGTTAGTCCACAAGCTAGTGAAACTACTCAAAATACAGAAAATTATAATGTTGTTCCAACGCAGGACAATAATCAAGAAGTACAACATAAAGAAGCAACTCAACCACAAAATCCCAACAATTATGGTTATTTAGATTCAGTTAGTTTATCAAACAACGAGTTGCAAGTTAGTGGTTGG…
GCF_910574725.1	NZ_CAJTCB0100000071.26656.AOI_01	64.3;Enterolysin_A	LKRKTRIHLWSIIISIVGVITLLLFAVSLIIAMLVGSDEGCDSSIDTATISAGGISNGNWKDKNSAEYKAAKTIFETLTKKMGFSGAGAAGAVGNAIGESGLDVWKPNGVGYNGLFQWSQNQRLIAGGIIKSVDPSELTLDNEIKLMQYELNHGYTKVKTSVGKATDVHQATWNWFIDYEGMAGNENQYGQQRDPGAQWAYQEFGGSNISSNDSLLNGAAATADTGVAQDQQNNACNTDGGDTASGKWGWPFKTIPKDGPTRYENGQQYGHTGMIRGGGNDFHDGYDFGSAIVGAGQPILAVHDGKVFKVANDVGWWYVWVKSSDGYNEVYQEAFNSRGDITVNEGDEIKVGDKIGTLSGSHLHLGITKKAITSSVQSGYSDDGTWLDPIKIIKEGINN	TTGAAAAGGAAGACTAGAATTCATCTTTGGAGCATTATTATTTCGATTGTAGGAGTTATTACTTTATTATTATTTGCAGTTTCCTTAATTATTGCGATGCTAGTAGGTAGCGACGAAGGCTGTGATAGTAGTATTGATACCGCAACAATTTCGGCTGGCGGTATTAGTAATGGAAATTGGAAGGATAAAAATTCAGCTGAGTATAAGGCAGCAAAGACTATTTTTGAAACCTTAACTAAAAAGATGGGCTTTAGCGGTGCTGGCGCAGCAGGAGCGGTCGGTAATGCAATAGGTGAATCGGGACTTGATGTTTGGAAGCCAAATGGAGTTGGTTATAATGGCTTATTTCAGTGGAGTCAAAATCAACGCCTAATTGCTGGTGGAATTATTAAGAGCGTA…
GCF_910574725.1	NZ_CAJTCB0100000281.26632.AOI_01	64.3;Enterolysin_A	MEDKLIFKPSHLKSKVLSTLTVCGGALFLLSGNAAADDQTTDVQQPVTPQQTTNEQPNTSTVDVQTPNTYNGVAVSPQASETTQNTENYNVVPTQDNNQEVQHKEATQPQNPNNYGYLDSVSLSNNELQVSGWQATNQAADKPYHYVIAYDNTVNAELGRQQVENVSRPDVAQAYPDATNADNSGFNSTIKLNTTNEDYTNHSISVISRYSDATNGEGNHVDYWYPAFTFDQGNYAWLDDMHTENDQLHVSGWNATNQANNKDYHYVILYDTTKGHELSRQLVDETASQRPDVQKAYSNVNNAGKSGFNVTFDLSKLSFDASDQLQIISRYSNAENGEGDRVDYWFAPTSRENQGYLDSANFSNGQLVVNGWHANDASTIAPNHFLILFDQTAKKQAGV…	ATGGAGGACAAGCTTATTTTTAAACCTAGTCATTTAAAATCAAAAGTTTTATCTACTCTTACTGTATGTGGAGGAGCTTTATTCCTGTTAAGCGGAAATGCTGCTGCTGATGATCAAACAACTGATGTTCAACAACCAGTTACTCCTCAACAAACAACTAATGAACAACCAAATACATCCACAGTTGATGTACAAACACCAAATACATATAACGGAGTAGCAGTTAGTCCACAAGCTAGTGAAACTACTCAAAATACAGAAAATTATAATGTTGTTCCAACGCAGGACAATAATCAAGAAGTACAACATAAAGAAGCAACTCAACCACAAAATCCCAACAATTATGGTTATTTAGATTCAGTTAGTTTATCAAACAACGAGTTGCAAGTTAGTGGTTGG…
GCF_910574795.1	NZ_CAJTCN0100000071.26694.AOI_01	64.3;Enterolysin_A	LKRKTRIHLWSIIISIVGVITLLLFAVSLIIAMLVGSDEGCDSSIDTATISAGGISNGNWKDKNSAEYKAAKTIFETLTKKMGFSGAGAAGAVGNAIGESGLDVWKPNGVGYNGLFQWSQNQRLIAGGIIKSVDPSELTLDNEIKLMQYELNHGYTKVKTSVGKATDVHQATWNWFIDYEGMAGNENQYGQQRDPGAQWAYQEFGGSNISSNDSLLNGAAATADTGVAQDQQNNACNTDGGDTASGKWGWPFKTIPKDGPTRYENGQQYGHTGMIRGGGNDFHDGYDFGSAIVGAGQPILAVHDGKVFKVANDVGWWYVWVKSSDGYNEVYQEAFNSRGDITVNEGDEIKVGDKIGTLSGSHLHLGITKKAITSSVQSGYSDDGTWLDPIKIIKEGINN	TTGAAAAGGAAGACTAGAATTCATCTTTGGAGCATTATTATTTCGATTGTAGGAGTTATTACTTTATTATTATTTGCAGTTTCCTTAATTATTGCGATGCTAGTAGGTAGCGACGAAGGCTGTGATAGTAGTATTGATACCGCAACAATTTCGGCTGGCGGTATTAGTAATGGAAATTGGAAGGATAAAAATTCAGCTGAGTATAAGGCAGCAAAGACTATTTTTGAAACCTTAACTAAAAAGATGGGCTTTAGCGGTGCTGGCGCAGCAGGAGCGGTCGGTAATGCAATAGGTGAATCGGGACTTGATGTTTGGAAGCCAAATGGAGTTGGTTATAATGGCTTATTTCAGTGGAGTCAAAATCAACGCCTAATTGCTGGTGGAATTATTAAGAGCGTA…
GCF_910574795.1	NZ_CAJTCN0100000271.26699.AOI_01	64.3;Enterolysin_A	MEDKLIFKPSHLKSKVLSTLTVCGGALFLLSGNAAADDQTTDVQQPVTPQQTTNEQPNTSTVDVQTPNTYNGVAVSPQASETTQNTENYNVVPTQDNNQEVQHKEATQPQNPNNYGYLDSVSLSNNELQVSGWQATNQAADKPYHYVIAYDNTVNAELGRQQVENVSRPDVAQAYPDATNADNSGFNSTIKLNTTNEDYTNHSISVISRYSDATNGEGNHVDYWYPAFTFDQGNYAWLDDMHTENDQLHVSGWNATNQANNKDYHYVILYDTTKGHELSRQLVDETASQRPDVQKAYSNVNNAGKSGFNVTFDLSKLSFDASDQLQIISRYSNAENGEGDRVDYWFAPTSRENQGYLDSANFSNGQLVVNGWHANDASTIAPNHFLILFDQTAKKQAGV…	ATGGAGGACAAGCTTATTTTTAAACCTAGTCATTTAAAATCAAAAGTTTTATCTACTCTTACTGTATGTGGAGGAGCTTTATTCCTGTTAAGCGGAAATGCTGCTGCTGATGATCAAACAACTGATGTTCAACAACCAGTTACTCCTCAACAAACAACTAATGAACAACCAAATACATCCACAGTTGATGTACAAACACCAAATACATATAACGGAGTAGCAGTTAGTCCACAAGCTAGTGAAACTACTCAAAATACAGAAAATTATAATGTTGTTCCAACGCAGGACAATAATCAAGAAGTACAACATAAAGAAGCAACTCAACCACAAAATCCCAACAATTATGGTTATTTAGATTCAGTTAGTTTATCAAACAACGAGTTGCAAGTTAGTGGTTGG…
GCF_910576155.1	NZ_CAJTHP0100000201.26760.AOI_01	64.3;Enterolysin_A	LKRKTRIHLWSIIISIVGVITLLLFAVSLIIAMLVGSDEGCDSSIDTATISAGGISNGNWKDKNSAEYKAAKTIFETLTKKMGFSGAGAAGAVGNAIGESGLDVWKPNGVGYNGLFQWSQNQRLIAGGIIKSVDPSELTLDNEIKLMQYELNHGYTKVKTSVGKATDVHQATWNWFIDYEGMAGNENQYGQQRDPGAQWAYQEFGGSNISSNDSLLNGAAATADTGVAQDQQNNACNTDGGDTASGKWGWPFKTIPKDGPTRYENGQQYGHTGMIRGGGNDFHDGYDFGSAIVGAGQPILAVHDGKVFKVANDVGWWYVWVKSSDGYNEVYQEAFNSRGDITVNEGDEIKVGDKIGTLSGSHLHLGITKKAITSSVQSGYSDDGTWLDPIKIIKEGINN	TTGAAAAGGAAGACTAGAATTCATCTTTGGAGCATTATTATTTCGATTGTAGGAGTTATTACTTTATTATTATTTGCAGTTTCCTTAATTATTGCGATGCTAGTAGGTAGCGACGAAGGCTGTGATAGTAGTATTGATACCGCAACAATTTCGGCTGGCGGTATTAGTAATGGAAATTGGAAGGATAAAAATTCAGCTGAGTATAAGGCAGCAAAGACTATTTTTGAAACCTTAACTAAAAAGATGGGCTTTAGCGGTGCTGGCGCAGCAGGAGCGGTCGGTAATGCAATAGGTGAATCGGGACTTGATGTTTGGAAGCCAAATGGAGTTGGTTATAATGGCTTATTTCAGTGGAGTCAAAATCAACGCCTAATTGCTGGTGGAATTATTAAGAGCGTA…
GCF_910576155.1	NZ_CAJTHP0100000281.26752.AOI_01	64.3;Enterolysin_A	MEDKLIFKPSHLKSKVLSTLTVCGGALFLLSGNAAADDQTTDVQQPVTPQQTTNEQPNTSTVDVQTPNTYNGVAVSPQASETTQNTENYNVVPTQDNNQEVQHKEATQPQNPNNYGYLDSVSLSNNELQVSGWQATNQAADKPYHYVIAYDNTVNAELGRQQVENVSRPDVAQAYPDATNADNSGFNSTIKLNTTNEDYTNHSISVISRYSDATNGEGNHVDYWYPAFTFDQGNYAWLDDMHTENDQLHVSGWNATNQANNKDYHCVILYDTTKGHELSRQLVDETASQRPDVQKAYSNVNNAGKSGFNVTFDLSKLSFDASDQLQIISRYSNAENGEGDRVDYWFAPTSRENQGYLDSANFSNGQLVVNGWHANDASTIAPNHFLILFDQTAKKQAGV…	ATGGAGGACAAGCTTATTTTTAAACCTAGTCATTTAAAATCAAAAGTTTTATCTACTCTTACTGTATGTGGAGGAGCTTTATTCCTGTTAAGCGGAAATGCTGCTGCTGATGATCAAACAACTGATGTTCAACAACCAGTTACTCCTCAACAAACAACTAATGAACAACCAAATACATCCACAGTTGATGTACAAACACCAAATACATATAACGGAGTAGCAGTTAGTCCACAAGCTAGTGAAACTACTCAAAATACAGAAAATTATAATGTTGTTCCAACGCAGGACAATAATCAAGAAGTACAACATAAAGAAGCAACTCAACCACAAAATCCCAACAATTATGGTTATTTAGATTCAGTTAGTTTATCAAACAACGAGTTGCAAGTTAGTGGTTGG…
GCF_925280345.1	NZ_CAKMAK0100000011.26799.AOI_01	64.3;Enterolysin_A	MEDKLIFKPSHLKSKVLSTLTVCGGALFLLSGNAAADDQTNDVQQPVTPQQTTNEQPNTSTVDVQTPNTYNGVAVSPQASETTQNTENYNVVPTQDNNQEVQHKEATQPQNPNNYGYLDSVSLSNNELQVSGWQATNQAADKPYHYVIAYDNTANTELGRQQVENVSRPDVAQAYPDATNADTSGFNSTIKLNTTNEDYTNHSISVVSRYSDATNGEGNHVDYWYPAFTFDQGNHAWLDDMHTENDQLHISGWNATNQATNKDYHYVILYDTTKGHELSRQLVDETTSQRPDVQKAYSNVNNAGKSGFNVTFDLSKLFFDASDQLQVISRYSNAENGEGDRVDYWFAPTSRENQGYLDSANFSNGQLVVNGWHANDASTIAPNHFLILFDQTAKKQAGV…	ATGGAGGACAAGCTTATTTTTAAACCTAGTCATTTAAAATCAAAAGTTTTATCTACTCTTACTGTATGTGGAGGAGCTTTATTCCTGTTAAGTGGAAATGCTGCTGCTGATGATCAAACAAATGATGTTCAACAACCAGTTACTCCTCAACAAACAACTAATGAACAACCAAATACATCTACGGTTGATGTACAAACACCAAATACATATAACGGAGTAGCAGTTAGTCCACAAGCTAGTGAAACTACTCAAAATACGGAAAATTATAATGTTGTTCCAACGCAGGACAATAATCAAGAAGTACAACATAAAGAAGCAACTCAACCACAAAATCCCAACAATTATGGTTATTTAGATTCAGTTAGCTTATCAAACAACGAGTTGCAAGTTAGTGGTTGG…
GCF_925283095.1	NZ_CAKMAY0100000141.26879.AOI_01	63.3;Enterolysin_A	VRTISLVLMTPHKETTKEPIGDIILWPTMQSEWSKNSTFQLTFSVFDYDSALYDPLDVESSIVLEGQEYIVKNCVENFDTNTKNITAWHVYNEISRIYKRSDLTLNNNQDSNANKDQSYGVEDLLKAWIDGNKLGFSYEVHGNFDKQSTSKFDSGSGKEMLSKITELWPSAVIYPDNKKIRVYSEDEFYKDNGRVIDFPRDAKSVKTTRDSQSIINMIRCVGGKHEVQHTVYTGTGGTNANGPTEPVNGDWTPVIQYAASFYGIKPNAQQLNVLRAQIHLESGGNETIPQPGTDPDGDGSGPALGLLQFKRGTFNTYCREPYTNILKGFDQLIAFFNIPNALGQINGVTGWSPHGAPITKDKLIISPPNPWGWPFPDIGEGHFSLGQTFGTHPQDGVGR…	GTGAGGACAATTAGTTTAGTATTGATGACACCTCATAAAGAAACAACTAAGGAGCCGATTGGAGACATTATTCTCTGGCCAACAATGCAAAGCGAATGGTCTAAGAATTCGACCTTTCAATTGACTTTCTCAGTATTTGACTATGATTCAGCATTGTATGATCCATTAGATGTTGAAAGTTCGATTGTGCTTGAGGGACAGGAATATATTGTAAAAAATTGTGTTGAAAACTTTGACACTAATACGAAAAATATCACTGCCTGGCATGTTTACAATGAGATTAGTCGAATTTATAAACGAAGTGACCTTACCTTAAATAACAATCAGGATAGTAATGCTAATAAGGATCAGTCTTATGGAGTTGAGGACTTACTAAAGGCTTGGATTGATGGAAATAAG…
GCF_925283095.1	NZ_CAKMAY0100000511.26815.AOI_01	64.3;Enterolysin_A	MEDKLIFKPSHLKSKVLSTLTVCGGALFLLSGNAAADDQTTDVQQPVTPQQTTNEQPNTSTVDVQTPNTYNGVAVSPQASETTQNTENYNVVPTQDNNQEVQHKEATQPQNPNNYGYLDSVSLSNNELQVSGWQATNQAADKPYHYVIAYDNTVNAELGRQQVENVSRPDVAQAYPDATNADNSGFNSTIKLNTTNEDYTNHSISVISRYSDATNGEGNHVDYWYPAFTFDQGNYAWLDDMHTENDQLHVSGWNATNQANNKDYHYVILYDTTKGRELSRQLVDETASQRPDVQKAYSNVNNAGKSGFNVTFDLSKLSFDASDQLQVISRYSNAENGEGDRVDYWFAPTSRENQGYLDSANFSNGQLVVNGWHANDASTIAPNHFLILFDQTAKKQAGV…	ATGGAGGACAAGCTTATTTTTAAACCTAGTCATTTAAAATCAAAAGTTTTATCTACTCTTACTGTGTGTGGAGGAGCTTTATTCCTGTTAAGTGGGAATGCTGCTGCTGATGATCAAACAACTGATGTTCAACAACCAGTTACTCCTCAACAAACAACTAATGAACAACCAAATACATCCACGGTTGATGTACAAACACCAAATACATATAACGGAGTAGCAGTTAGTCCACAAGCTAGTGAAACTACTCAAAATACAGAAAATTATAATGTTGTTCCAACGCAGGACAATAATCAAGAAGTACAACATAAAGAAGCAACTCAACCACAAAATCCCAACAATTATGGTTATTTAGATTCAGTTAGTTTATCAAACAACGAGTTGCAAGTTAGTGGTTGG…
GCF_925285275.1	NZ_CAKMBD0100000061.26890.AOI_01	64.3;Enterolysin_A	MEDKLIFKPSHLKSKVLSTLTVCGGALFLLSGNAAADDQTNDVQQPVTPQQTTNEQPNTSTVDVQTPNTYNGVAVSPQASETTQNTENYNVVPTQDNNQEVQHKEATQPQNPNNYGYLDSVSLSNNELQVSGWQATNQAADKPYHYVIAYDNTANTELGRQQVENVSRPDVAQAYPDATNADTSGFNSTIKLNTTNEDYTNHSISVVSRYSDATNGEGNHVDYWYPAFTFDQGNHAWLDDMHTENDQLHISGWNATNQATNKDYHYVILYDTTKGHELSRQLVDETTSQRPDVQKAYSNVNNAGKSGFNVTFDLSKLFFDASDQLQVISRYSNAENGEGDRVDYWFAPTSRENQGYLDSANFSNGQLVVNGWHANDASTIAPNHFLILFDQTAKKQAGV…	ATGGAGGACAAGCTTATTTTTAAACCTAGTCATTTAAAATCAAAAGTTTTATCTACTCTTACTGTATGTGGAGGAGCTTTATTCCTGTTAAGTGGAAATGCTGCTGCTGATGATCAAACAAATGATGTTCAACAACCAGTTACTCCTCAACAAACAACTAATGAACAACCAAATACATCTACGGTTGATGTACAAACACCAAATACATATAACGGAGTAGCAGTTAGTCCACAAGCTAGTGAAACTACTCAAAATACGGAAAATTATAATGTTGTTCCAACGCAGGACAATAATCAAGAAGTACAACATAAAGAAGCAACTCAACCACAAAATCCCAACAATTATGGTTATTTAGATTCAGTTAGCTTATCAAACAACGAGTTGCAAGTTAGTGGTTGG…
GCF_925285275.1	NZ_CAKMBD0100000341.26894.AOI_01	63.3;Enterolysin_A	LWPTFKPSWEKNSTYQVTFSVFNYGDPLYDELDVESSFFLDGQEYIVKNCVENFDTNTKDITAWHVYNEINRIYKRSDLTLNKPTDDNQNQDVSYSVEDILKAWIDGNNLGFSYEVHGNFDKQSTSKFDSGSGKDMLSKILELWPNAIVFPNNKNIRVYSEDEFYKDNGRIIDFPHDAKSVKTTRDSQSIINEIRCVGGKHEVQHTVYTGTGGANASGPTEPVNGDWTPVIQYAASFYGIKPTDQQLNVLRAQIHLESGGREDAQQPGADPDGDGSGPALGLLQFKQRTFNYYCREPYTNVKHGFDALIAFFNIPNALGQINGVTGWSPHGAPITKDKLIITPPNPWGWPFPNVGEGHFSLGQTFGTHPQDGVGRTNGFHDGLDFGSVDHPGSEVHAVH…	TTGTGGCCAACTTTTAAGCCTAGCTGGGAGAAAAACTCTACCTATCAAGTTACCTTTTCAGTATTTAACTACGGTGACCCGTTGTATGACGAACTAGACGTTGAAAGCTCGTTCTTCTTAGATGGCCAGGAGTATATTGTTAAGAATTGCGTTGAGAACTTCGATACAAATACTAAAGATATCACTGCCTGGCATGTCTACAATGAGATCAATCGAATCTATAAACGTAGTGACCTAACACTTAATAAGCCGACTGATGATAATCAAAACCAAGATGTCTCATACTCGGTAGAAGATATTCTTAAAGCGTGGATAGATGGTAATAACTTAGGGTTCAGCTATGAGGTTCATGGTAACTTCGATAAGCAGTCGACTTCTAAATTTGATAGTGGTAGCGGT…
GCF_940926095.1	NZ_CALNWZ0100000141.26958.AOI_01	63.3;Enterolysin_A	MIRDQIVLTDGLNNHSNTKGESVDFNDLYNSFKINWQLNSSYIISFTLTYTRQYKEAYNLAKMKHYVEYYPVHGNAQWYVIQQIEDGLDENGLPTLTITANHSLIDRMKNIRLDPRQPTENDPDVSGDSGSDSSSSSDNNNQQPGTTVTIKQTDVQQTYSLEEQLHKFIDNNNQQVQLEIHGTFPKMPAEATGSLYEWLGSNLASYGAFWIPDGDTLKVYDLSSLQQRTDTVFRYLNNMTTANLQSDGNDLVNDCWVYGGKVEKDITTVTASGGTSDGVTEAINGDWTQAIKNAASVSGIKVSDADVNKIKGQIRLESGGNETIMGGTDGLADGRATGLLQFKPGTFNYYCRPPYTNIMKGFDQLIAFFNIPNAVGQISGGLSGWSPHGAPISKATIQI…	ATGATACGTGATCAAATTGTATTAACCGATGGACTTAATAATCATAGTAATACTAAAGGCGAAAGTGTTGATTTTAACGATCTATATAACTCATTTAAAATCAATTGGCAGCTTAACTCTTCTTACATTATTTCATTCACGCTTACATATACTAGACAATATAAGGAAGCGTACAATCTTGCTAAGATGAAACATTATGTTGAATATTACCCCGTTCATGGAAATGCTCAGTGGTATGTAATTCAACAGATAGAAGACGGCTTAGATGAGAATGGGTTACCAACATTAACCATTACTGCTAATCATTCTTTAATAGATCGAATGAAAAATATTCGTCTTGATCCTCGACAACCGACTGAAAACGATCCTGATGTTAGTGGTGATTCTGGGTCTGATAGT…
GCF_940926095.1	NZ_CALNWZ0100000441.26925.AOI_01	64.3;Enterolysin_A	MEDKLIFKPSHLKSKVLSTLTVCGGALFLLSGNAAADDQTTDVQQPVTPQQTTNEQPNTSTVDVQTPNTYNGVAVSPQASETTQNTENYNVVPTQDNNQEVQHKEATQPQNPNNYGYLDSVSLSNNELQVSGWQATNQAADKPYHYVIAYDNTVNAELGRQQVENVSRPDVAQAYPDATNADNSGFNSTIKLNTTNEDYTNHSISVISRYSDATNGEGNHVDYWYPAFTFDQGNYAWLDDVHTENDQLHVSGWNATNQANNKDYHYVILYDTTKGRELSRQLVDETASQRPDVQKAYSNVNNAGKSGFNVTFDLSKLSFDASDQLQVISRYSNAENGEGDRVDYWFAPTSRENQGYLDSANFSNGQLVVNGWHANDASTIAPNHFLILFDQTAKKQAGV…	ATGGAGGACAAGCTTATTTTTAAACCTAGTCATTTAAAATCAAAAGTTTTATCTACTCTTACTGTGTGTGGAGGAGCTTTATTCCTGTTAAGTGGGAATGCTGCTGCTGATGATCAAACAACTGATGTTCAACAACCAGTTACTCCTCAACAAACAACTAATGAACAACCAAATACATCCACGGTTGATGTACAAACACCAAATACATATAACGGAGTAGCAGTTAGTCCACAAGCTAGTGAAACTACTCAAAATACAGAAAATTATAATGTTGTTCCAACGCAGGACAATAATCAAGAAGTACAACATAAAGAAGCAACTCAACCACAAAATCCCAACAATTATGGTTATTTAGATTCAGTTAGTTTATCAAACAACGAGTTGCAAGTTAGTGGTTGG…
GCF_947381575.1	NZ_CANCWD0100000041.27007.AOI_01	63.3;Enterolysin_A	LWPTFKPSWEKNSTYQVTFSVFNYGDPLYDELDVESSFFLDGQEYVVKNCVENFDTNTKDITAWHVYNEINRIYKRSDLTLNKPTDDTQNQDISYSVEDILKAWIDGNNLGFSYEVHGNFDKQSTSKFDSGSGKDMLSKILELWPNAIIFPDNKNIRVYSEDEFYKDNGRIIDFPHDAKSVKTTRDSQSIINEIRCVGGKHEVQHTVYTGTGGANASGPTEPVNGDWTPVIQYAASFYGIKPTGQQLNVLRAQIHLESGGREDAQQPGADPDGDGSGPALGLLQFKQLTFNYYCREPYTNVKHGFDVLIAFFNIPNALGQINGVTGWSPHGAPITKDKLIITPPNPWGWPFPNVGEGHFSLGQTFGTHPQDGVGRTNGFHDGLDFGSVDHPGSEVHAIH…	TTGTGGCCAACCTTTAAGCCTAGTTGGGAGAAGAACTCTACCTATCAAGTTACCTTTTCAGTATTTAACTACGGTGATCCATTGTATGACGAACTAGACGTTGAGAGTTCGTTCTTCTTAGATGGCCAGGAGTATGTTGTTAAGAATTGCGTTGAGAACTTCGATACCAATACTAAAGATATCACTGCCTGGCATGTCTATAATGAGATCAATCGAATCTATAAGCGAAGTGACCTAACACTGAATAAACCGACTGATGATACTCAAAATCAGGATATCTCCTATTCGGTGGAGGATATTCTTAAGGCATGGATAGATGGTAATAACTTGGGGTTCAGTTACGAGGTTCATGGCAATTTCGATAAGCAGTCAACTTCTAAGTTTGATAGCGGTAGCGGT…
GCF_947381575.1	NZ_CANCWD0100000051.27038.AOI_01	63.3;Enterolysin_A	MIRDQVVLTNGLDNFSNTQGEVVDYSDLHDSFKVNYQLSSAYEISLTLTYTDQFAEAYKLAKMKRYVEYAYDDGTRQFFAIQQMEEGVDETGQPTLQITATHALIDLMKNIRIDPKQPTEDNPDVSGSGSDSSSDSSDDNDDNNDNQQPGTTVTVKQTDVQQTYSLEEQLHKFIDNNDQGVKLAIYGTFPKMANEATGSLYEWLGSNLASYGAFWYPDGYTLRVYDLPSIQHRSDETFRYLNNMTKVDLQSDGNDLVNDCWVYGGKVQKDITTVTATGGVSNGVTTAVNGDWSQAAKNAANVMGVSMNDQQLGVLLAQIKLESGGNDQAKGGTDGLSDGPALGLLQFKQGTFNYYCRPPYTNIMSGFDQLIAFFNIPNCFGQITGRHGWSPSGAPLSKA…	ATGATACGTGATCAAGTTGTTTTAACAAATGGATTGGATAATTTCTCTAATACGCAAGGAGAAGTAGTTGACTATAGCGACTTACACGACTCATTCAAAGTGAACTATCAGTTAAGCTCTGCTTACGAAATCTCACTTACATTAACCTATACAGACCAATTTGCAGAGGCTTATAAGCTAGCAAAGATGAAGCGATACGTTGAATACGCTTATGATGATGGAACTCGTCAATTCTTTGCAATTCAGCAAATGGAAGAGGGTGTTGACGAGACTGGTCAACCAACATTACAAATAACAGCTACTCATGCACTAATTGATTTAATGAAGAATATCCGAATAGACCCCAAACAGCCAACAGAAGATAATCCAGATGTTAGCGGTTCGGGGTCTGATAGTTCT…
GCF_947381575.1	NZ_CANCWD0100000201.26987.AOI_01	64.3;Enterolysin_A	MEDKLIFKPSHLKSKVLSTLTVCGGALFLLSGNAAADDQTTDVQQPVTPQQTTNEQPNTSTVDVQTPNTYNGVAVSPQASETTQNTENYNVVPTQDNNQEVQHKEATQPQNPNNYGYLDSISLSNNELQVSGWQATNQAADKPYHYVIAYDNTANTELGRQQVENVSRPDVAQAYPDATNADTSGFNSTIKLNTTNEDYTNHSISVVSRYSDATNGEGNHVDYWYPAFTFDQGNHAWLDDMHTENDQLHISGWNATNQATNKDYHYVILYDTTKGHELSRQLVDETASQRPDVQKVYSNVNNAGKSGFNVTFDLSKLFFDASDQLQVISRYSNAENGEGDRVDYWFAPTSRENQGYLDSANFSNGQLVVNGWHANDASTIAPNHFLILFDQTAKKQAGV…	ATGGAGGACAAGCTTATTTTTAAACCTAGTCATTTAAAATCAAAAGTTTTATCTACTCTTACTGTATGTGGAGGAGCTTTATTCCTGTTAAGTGGAAATGCTGCTGCTGATGATCAAACAACTGATGTTCAACAACCAGTTACTCCTCAACAAACAACTAATGAACAACCAAATACATCTACGGTTGATGTACAAACACCAAATACATATAACGGAGTAGCAGTTAGTCCACAAGCTAGTGAAACTACTCAAAATACGGAAAATTATAATGTTGTTCCAACGCAGGACAATAATCAAGAAGTACAACATAAAGAAGCAACTCAACCACAAAATCCCAACAATTATGGTTATTTAGATTCAATTAGCTTATCAAACAACGAGTTGCAAGTTAGTGGTTGG…
GCF_947381675.1	NZ_CANCWL0100000071.27072.AOI_01	63.3;Enterolysin_A	VRIISLVLMTPHKETTKEPIGDIILWPTMQSEWSKNSTFQLTFSVFDYDSALYDPLDVESSIVLEGQEYIVKNCVENFDTNTKNITAWHVYNEISRIYKRSDLTLNNNQDSNANKDQSYGVEDLLKAWIDGNKLGFSYEVHGNFDKQSTSKFDSGSGKEMLSKITELWPSAVIYPDNKKIRVYSEDEFYKDNGRVIDFPRDAKSVKTTRDSQSIINMIRCVGGKHEVQHTVYTGTGGTNTNGPTEPVNGDWTPVIQYAASLYGIKPNAQQLNVLRAQIQHESSGRQDAQQPGADPDGDGTGPALGLLQFKQQTFNYYCREPYTNVKHGFDTLVAFFNIPNALGQINGVTGWSPHGAPITKDKLIISPPNSWGWPFPDVGEGHFSLGQTFGTHPQDGVGR…	GTGAGGATAATTAGTTTAGTATTGATGACACCTCATAAAGAGACAACTAAGGAACCGATTGGAGACATTATTCTCTGGCCAACAATGCAAAGCGAGTGGTCTAAGAACTCAACCTTTCAATTAACATTTTCAGTATTTGATTACGACTCAGCATTGTATGATCCGTTAGATGTTGAAAGTTCAATTGTGCTTGAGGGACAGGAATATATTGTAAAAAATTGTGTTGAAAACTTTGATACGAACACAAAAAATATCACTGCTTGGCATGTCTATAATGAGATTAGTCGAATTTATAAACGAAGTGACCTTACCTTAAATAACAATCAGGATAGTAATGCTAATAAGGATCAGTCTTATGGAGTTGAGGACTTACTAAAGGCTTGGATTGATGGGAATAAG…
GCF_947381675.1	NZ_CANCWL0100000171.27039.AOI_01	64.3;Enterolysin_A	MEDKLIFKPSHLKSKVLSTLTVCGGALFLLSGNAAADDQTTDVQQPVTPQQTTNEQPNTSTIDVQTPNTYNGVAVSPQASEATQNTENYNVVPTQGNNQEVQHKEATQPQNPNNYGYLDSVSLSNNELQVSGWQATNQAEDKPYHYVIAYDNTAKAELGRQQVENVSRPDVAKVHSDATNAATSGFNSTIKLNTANEDYTNHSISVISRYSDAQNGEGNHVDYWYPAFTFDQGNYAWLDDMHTENDQLHVTGWNATNQASNKDYHYVILYNKTKGHELSRQLVDEKNSQRPDVQKVYQNVNNATKSGFNVTFDLSKLSFDASDQLQVISRYSDAQNGEGNRVDFWFAPTSRENQGNLDSANFSNGQLVVNGWHANDASTIAPNHFLILFDRTANKQAAS…	ATGGAGGACAAGCTTATTTTTAAACCTAGTCATTTAAAATCAAAAGTTTTATCTACTCTTACTGTATGTGGAGGAGCTTTATTCCTGTTAAGTGGGAATGCTGCTGCTGATGATCAAACAACTGATGTTCAACAACCAGTTACTCCTCAACAAACAACTAATGAACAACCAAATACATCCACAATTGATGTACAAACACCAAATACATATAACGGAGTAGCAGTTAGTCCACAAGCTAGTGAAGCTACTCAAAATACAGAAAATTATAATGTTGTTCCAACGCAGGGCAATAATCAAGAAGTACAACATAAAGAAGCAACTCAACCACAAAATCCCAACAATTATGGTTATTTAGATTCAGTTAGTTTATCAAACAACGAGTTGCAAGTTAGTGGTTGG…
GCF_001046835.1	NZ_CP0110241.274.AOI_01	63.3;Enterolysin_A	MSEFVWLTNGISNKLATEARKADWQDMHTSFKANFQLSSAYEISFTLTYTEQYKDAFNLVKEKRYVNYRGHDYLIQQVEAKHDENGLATLQVTATHRLIDAMKDIVLYSTIPTEGNPEVSGGGSSDSGDGDSGDPQPGIVTKQTAVQQTYPLNERLDHFFNPNEWGITYKLHGNFPQAAVDCTGSLYEWLNSNLKLFGAYWKPDSDMVVGIYDLESLKKPTNKVFRYLHDMSNVDIQSDATNLINDVWVYGGKMEKDITSVLGPGGQTNGATEPQNGDWTPVIQNAASLIGEKLSDADIANIKNRIRIESNGNETIQNNWDSNAQAGHPSIGLVQFIQSTFDYYCRPPYTDIRKGLDQLIAMMNIPNWRQQIAGSGGWSPHGAPISKATIDIKSVVDNS…	ATGAGTGAGTTTGTATGGCTAACTAACGGAATTAGTAATAAGCTGGCAACGGAAGCACGTAAAGCCGATTGGCAGGATATGCACACATCATTTAAGGCTAATTTTCAGTTGAGTTCAGCTTATGAAATCTCATTTACACTAACTTATACCGAGCAATATAAAGATGCTTTTAATCTAGTCAAAGAAAAACGCTATGTAAATTATCGTGGTCATGATTACCTAATCCAGCAAGTGGAAGCCAAACATGATGAAAATGGATTGGCTACCCTGCAAGTAACGGCTACTCATCGGCTAATTGATGCTATGAAAGATATAGTCCTTTATTCAACAATTCCGACAGAAGGAAATCCTGAGGTTAGCGGTGGCGGTAGTAGTGATTCTGGAGATGGTGATAGTGGT…
GCF_001618905.1	NZ_CP0147861.342.AOI_01	64.3;Enterolysin_A	LKRKTRIHLWSIIISIVGVITLLLFAVSLIIAMLVGSDEGCDSNVDTATISAGGISNGNWKDKNSAEYKAAKTIFETLTKQDGFSGAGAAGAVGNAIGESGLDVWKPNGVGYNGLFQWSQNQRLIAGGIIKSVDPSELTLDNEIKLMQYELNHGYTKVKTSVGKATDVHQATWNWFIDYEGMAGNENQYGQQRDPGAQWAYQEFGGSNISSNDSLLNGAAATADAGVAQDQQNSACNTDGGDTASGKWGWPFKTIPKDGPTRYENGQQYGHTGMIRGGGNDFHDGYDFGSAIVGAGQPILAVHDGKVFKVANDVGWWYVWVKSSDGYNEVYQEAFNSRGDITVNEGDEIKVGDKIGTLSGSHLHLGITKKAITSSVQSGYSDDGTWLDPIKIIKEGINN	TTGAAAAGGAAGACTAGAATTCATCTTTGGAGCATTATTATTTCGATTGTAGGAGTTATTACTTTATTATTATTTGCAGTTTCCTTAATTATTGCGATGCTAGTGGGTAGCGATGAAGGTTGTGATAGTAACGTTGATACCGCAACAATTTCAGCTGGCGGAATTAGCAATGGAAATTGGAAGGATAAAAATTCAGCTGAGTATAAAGCAGCAAAGACTATTTTTGAAACCTTAACTAAACAAGATGGATTTAGTGGAGCTGGCGCAGCAGGAGCGGTTGGTAATGCAATAGGTGAATCGGGACTTGATGTTTGGAAGCCAAATGGAGTTGGTTATAATGGCTTATTTCAATGGAGTCAAAACCAACGCTTAATTGCTGGTGGAATTATTAAGAGCGTA…
GCF_001688685.2	NZ_CP0154082.379.AOI_01	64.3;Enterolysin_A	MEDKLIFKPSHLKSKVLSTLTVCGGVLFLLSGNAAADDQTTDVQQPVTPQQTTNEQPNTSTIDVQTPNTYNGVAVSPQASEATQNTENYNVVPTQDNNQEVQHKEATQPQNPNNYGYLDSVSLSNNELQVSGWQATNQAADKPYHYVIAYDNTVNAELGRQQVENVSRPDVAQAYPDATNADNSGFNSTIKLNTTNEDYTNHSISVISRYSDATNGEGNHVDYWYPAFTFDQGNYAWLDDMHTENDQLHVSGWNATNQANNKDYHYVILYDTTKGHELSRQLVNETASQRPDVQKAYSNVNNAGKSGFNVTFDLSKLSFDASDQLQVISRYSNAENGEGDRVDYWFAPTSRENQGYLDSANFSNGQLVVNGWHANDASTIAPNHFLILFDRTANKQAAS…	ATGGAGGACAAGCTTATTTTTAAACCTAGTCATTTAAAATCAAAAGTTTTATCTACTCTTACTGTATGTGGAGGAGTTTTATTCCTGTTAAGTGGGAATGCTGCTGCTGATGATCAAACAACTGATGTTCAACAACCAGTTACTCCTCAACAAACAACTAATGAACAACCAAATACATCCACAATTGATGTACAAACACCAAATACATATAACGGAGTAGCAGTTAGTCCACAAGCTAGTGAAGCTACTCAAAATACAGAAAATTATAATGTTGTTCCAACGCAGGACAATAATCAAGAAGTACAACATAAAGAAGCAACTCAACCACAAAATCCCAACAATTATGGTTATTTAGATTCAGTTAGTTTATCAAACAACGAGTTGCAAGTTAGTGGTTGG…
GCF_003316895.1	NZ_CP0296131.7971.AOI_01	64.3;Enterolysin_A	LKRKTRIHLWSIIISIVGVITLLLFAVSLIIAMLVGSDEGCDSSIDTATISAGGISNGNWKDKNSAEYKAAKTIFETLTKKMGFSGAGAAGAVGNAIGESGLDVWKPNGVGYNGLFQWSQNQRLIAGGIIKSVDPSELTLDNEIKLMQYELNHGYTKVKTSVGKATDVHQATWNWFIDYEGMAGNENQYGQQRDPGAQWAYQEFGGSNISSNDSLLNGAAATADTGVAQDQQNNACNTDGGDTASGKWGWPFKTIPKDGPTRYENGQQYGHTGMIRGGGNDFHDGYDFGSAIVGAGQPILAVHDGKVFKVANDVGWWYVWVKSSDGYNEVYQEAFNSRGDITVNEGDEIKVGDKIGTLSGSHLHLGITKKAITSSVQSGYSDDGTWLDPIKIIKEGINN	TTGAAAAGGAAGACTAGAATTCATCTTTGGAGCATTATTATTTCGATTGTAGGAGTTATTACTTTATTATTATTTGCAGTTTCCTTAATTATTGCGATGCTAGTAGGTAGCGACGAAGGCTGTGATAGTAGTATTGATACCGCAACAATTTCGGCTGGCGGCATTAGTAATGGAAATTGGAAAGATAAAAATTCAGCTGAGTATAAGGCAGCAAAGACTATTTTTGAAACCTTAACTAAAAAGATGGGCTTTAGCGGTGCTGGCGCAGCCGGAGCGGTCGGTAATGCAATAGGTGAATCGGGACTTGATGTTTGGAAGCCAAATGGAGTTGGTTATAATGGCTTATTTCAGTGGAGTCAAAACCAACGCTTAATTGCTGGTGGAATTATTAAGAGCGTA…
GCF_003316935.1	NZ_CP0296151.7972.AOI_01	64.3;Enterolysin_A	LKRKTRIHLWSIIISIVGVITLLLFAVSLIIAMLVGSDEGCDSSIDTATISAGGISNGNWKDKNSAEYKAAKTIFETLTKKMGFSGAGAAGAVGNAIGESGLDVWKPNGVGYNGLFQWSQNQRLIAGGIIKSVDPSELTLDNEIKLMQYELNHGYTKVKTSVGKATDVHQATWNWFIDYEGMAGNENQYGQQRDPGAQWAYQEFGGSNISSNDSLLNGAAATADTGVAQDQQNNACNTDGGDTASGKWGWPFKTIPKDGPTRYENGQQYGHTGMIRGGGNDFHDGYDFGSAIVGAGQPILAVHDGKVFKVANDVGWWYVWVKSSDGYNEVYQEAFNSRGDITVNEGDEIKVGDKIGTLSGSHLHLGITKKAITSSVQSGYSDDGTWLDPIKIIKEGINN	TTGAAAAGGAAGACTAGAATTCATCTTTGGAGCATTATTATTTCGATTGTAGGAGTTATTACTTTATTATTATTTGCAGTTTCCTTAATTATTGCGATGCTAGTAGGTAGCGACGAAGGCTGTGATAGTAGTATTGATACCGCAACAATTTCGGCTGGCGGCATTAGTAATGGAAATTGGAAAGATAAAAATTCAGCTGAGTATAAGGCAGCAAAGACTATTTTTGAAACCTTAACTAAAAAGATGGGCTTTAGCGGTGCTGGCGCAGCCGGAGCGGTCGGTAATGCAATAGGTGAATCGGGACTTGATGTTTGGAAGCCAAATGGAGTTGGTTATAATGGCTTATTTCAGTGGAGTCAAAACCAACGCTTAATTGCTGGTGGAATTATTAAGAGCGTA…
GCF_006874665.1	NZ_CP0300891.8547.AOI_01	64.3;Enterolysin_A	MEDKLIFKPSHLKSKVLSTLTVCGGALFLLSGNAAADDQTTDVQQPVTPQQTTNEQPNTSTVDVQTPNTYNGVAVSPQASETTQNTENYNVVPTQDNNQEVQHKEVTQPQNPNNYGYLDSVSLSNNELQVSGWQATNQAADKPYHYVIAYDNTVNAELGRQQVENVSRPDVAQAYPDATNADNSGFNSTIKLNTTNEDYTNHSISVISRYSDATNGEGNHVDYWYPAFTFDQGNYAWLDDMHTENDQLHVSGWNATNQANNKDYHYVILYDTTKGRELSRQLVDETASQRPDVQKAYSNVNNAGKSGFNVTFDLSKLSFDASDQLQVISRYSNAENGEGDRVDYWFAPTSRENQGYLDSANFSNGQLVVNGWHANDASTIAPNHFLILFDQTAKKQAGV…	ATGGAGGACAAGCTTATTTTTAAACCTAGTCATTTAAAATCAAAAGTTTTATCTACTCTTACTGTGTGTGGAGGAGCTTTATTCCTGTTAAGTGGGAATGCTGCTGCTGATGATCAAACAACTGATGTTCAACAACCAGTTACTCCTCAACAAACAACTAATGAACAACCAAATACATCCACGGTTGATGTACAAACACCAAATACATATAACGGAGTAGCAGTTAGTCCACAAGCTAGTGAAACTACTCAAAATACAGAAAATTATAATGTTGTTCCAACGCAGGACAATAATCAAGAAGTACAACATAAAGAAGTAACTCAACCACAAAATCCCAACAATTATGGTTATTTAGATTCAGTTAGTTTATCAAACAACGAGTTGCAAGTTAGTGGTTGG…
GCF_004208615.1	NZ_CP0357901.8233.AOI_01	63.3;Enterolysin_A	MSEFVWLTNGISNKLATEARKADWQDMHTSFKANFQLSSAYEISFTLTYTEQYKDAFNLVKEKRYVNYRGHDYLIQQVEAKHDENGLATLQVTATHRLIDAMKDIVLYSTIPTEGNPEVSGGGSSDSGDGDSGDPQPGIVTKQTAVQQTYPLNERLDHFFNPNEWGITYKLHGNFPQAAVDCTGSLYEWLNSNLKLFGAYWKPDSDMVVGIYDLESLKKPTNKVFRYLHDMSNVDIQSDATNLINDVWVYGGKMEKDITSVLGPGGQTNGATEPQNGDWTPVIQNAASLIGEKLSDADIANIKNRIRIESNGNETIQNNWDSNAQAGHPSIGLVQFIQSTFDYYCRPPYTDIRKGLDQLIAMMNIPNWRQQIAGSGGWSPHGAPISKATIDIKSVVDNS…	ATGAGTGAGTTTGTATGGCTAACTAACGGAATTAGTAATAAGCTGGCAACGGAAGCACGTAAAGCCGATTGGCAGGATATGCACACATCATTTAAGGCTAATTTTCAGTTGAGTTCAGCTTATGAAATCTCATTTACACTAACTTATACCGAGCAATATAAAGATGCTTTTAATCTAGTCAAAGAAAAACGCTATGTAAATTATCGTGGTCATGATTACCTAATCCAGCAAGTGGAAGCCAAACATGATGAAAATGGATTGGCTACCCTGCAAGTAACGGCTACTCATCGGCTAATTGATGCTATGAAAGATATAGTCCTTTATTCAACAATTCCGACAGAAGGAAATCCTGAGGTTAGCGGTGGCGGTAGTAGTGATTCTGGAGATGGTGATAGTGGT…
GCF_007633215.1	NZ_CP0416761.8622.AOI_01	64.3;Enterolysin_A	MEDKLIFKPSHLKSKVLSTLTVCGGALFLLSGNAAADDQTTDVQQPVTPQQTTNEQPNTSTVDVQTPNTYNGVAVSPQASETTQNTENYNVVPTQDNNQEVQHKEATKPQNPNNYGYLDSVSLSNNELQVSGWQATNQAADKPYHYVIAYDNTVNAELGRQQVENVSRPDVAQAYPDATNADNSGFNSTIKLNTTNEDYTNHSISVISRYSDATNGEGNHVDYWYPAFTFDQGNYAWLDDMHTENDQLHVSGWNATNQANNKDYHYVILYDTTKGLELSRQLVDETASQRPDVQKAYSNVNNAGRSGFNVTFDLSKLSFDASDQLQVISRYSNAENGEGDRVDYWFAPTSRENQGYLDSANFSNGQLVVNGWHANDASTIAPNHFLILFDQTAKKQAGV…	ATGGAGGACAAGCTTATTTTTAAACCTAGTCATTTAAAATCAAAAGTTTTATCTACTCTTACTGTATGTGGAGGAGCTTTATTCCTGTTAAGTGGGAATGCTGCTGCTGATGATCAAACAACTGATGTTCAACAACCAGTTACTCCTCAACAAACAACTAATGAACAACCAAATACATCCACAGTTGATGTACAAACACCAAATACATATAACGGAGTAGCAGTTAGTCCACAAGCTAGTGAAACTACTCAAAATACAGAAAATTATAATGTTGTTCCAACGCAGGACAATAATCAAGAAGTACAACATAAAGAAGCAACTAAACCACAAAATCCCAACAATTATGGTTATTTAGATTCAGTTAGTTTATCAAACAACGAGTTGCAAGTTAGTGGTTGG…
GCF_009184725.1	NZ_CP0450491.8623.AOI_01	63.3;Enterolysin_A	MIRDQVVLTNGLDNFSNTQGEAVDYSDLHDSFKVNYQLSSAYEISFTLTYTDQFAEAYKLAKMKRYVEYAYDDGTRQFFTIQQMEEGVDETGQPTLQITATHALIDLMKNIRIDPKQPTEDNPDVSGLGPDSSSDSSDDNKDNQQPGTTVTVKQTDVQQTYSLEEQLHKFIDNNDQGVKLAIYGTFPKMANEATGSLYEWLGSNLASYGAFWYPDGYTLRVYDLPSIQHRSDETFRYLNNMTKVDLQSDGNDLVNDCWVYGGKVQKDITTVTATGGVSNGVTTAVNGDWSQAAKNAANVMGVSMNDQQLGVLLAQIKLESGGNDQAKGGTDGLSDGPALGLLQFKQGTFNYYCRPPYTNIMSGFDQLIAFFNIPNCFGQITGRHGWSPSGAPLSKATIQ…	ATGATACGTGATCAAGTTGTTTTAACAAATGGATTGGATAATTTTTCTAATACGCAAGGAGAAGCAGTTGACTACAGCGACTTGCATGACTCTTTCAAAGTAAATTATCAGTTGAGCTCTGCTTACGAAATTTCGTTTACATTAACCTATACAGACCAATTTGCAGAGGCTTATAAGCTAGCAAAGATGAAACGATACGTTGAATACGCTTATGACGATGGGACTCGTCAATTCTTTACAATTCAGCAAATGGAAGAGGGTGTTGATGAGACTGGTCAACCAACATTACAAATAACAGCTACTCATGCACTAATTGATTTAATGAAGAATATCCGAATAGACCCCAAACAGCCAACAGAAGATAATCCAGACGTTAGCGGTTTGGGGCCTGATAGTTCT…
GCF_015377805.1	NZ_CP0456051.13197.AOI_01	63.3;Enterolysin_A	MSEFVWLTNGISNKLATEARKADWQDMHTSFKANFQLSSAYEISFTLTYTEQYKDAFNLVKEKRYVNYRGHDYLIQQVEAKHDENGLATLQVTATHRLIDAMKDIVLYSTIPTEGNPEVSGGGSSDSGDGDSGDPQPGIVTKQTAVQQTYPLNERLDHFFNPNEWGITYKLHGNFPQAAVDCTGSLYEWLNSNLKLFGAYWKPDSDMVVGIYDLESLKKPTNKVFRYLHDMSNVDIQSDATNLINDVWVYGGKMEKDITSVLGPGGQTNGATEPQNGDWTPVIQNAASLIGEKLSDADIANIKNRIRIESNGNETIQNNWDSNAQAGHPSIGLVQFIQSTFDYYCRPPYTDIRKGLDQLIAMMNIPNWRQQIAGSGGWSPHGAPISKATIDIKSVVDNS…	ATGAGTGAGTTTGTATGGCTAACTAACGGAATTAGTAATAAGCTGGCAACGGAAGCACGTAAAGCCGATTGGCAGGATATGCACACATCATTTAAGGCTAATTTTCAGTTGAGTTCAGCTTATGAAATCTCATTTACACTAACTTATACCGAGCAATATAAAGATGCTTTTAATCTAGTCAAAGAAAAACGCTATGTAAATTATCGTGGTCATGATTACCTAATCCAGCAAGTGGAAGCCAAACATGATGAAAATGGATTGGCTACCCTGCAAGTAACGGCTACTCATCGGCTAATTGATGCTATGAAAGATATAGTCCTTTATTCAACAATTCCGACAGAAGGAAATCCTGAGGTTAGCGGTGGCGGTAGTAGTGATTCTGGAGATGGTGATAGTGGT…
GCF_013487925.1	NZ_CP0474161.12953.AOI_01	63.3;Enterolysin_A	VRTISLVLMTPHKETTKEPIGDIILWPTMQSEWSKNSTFQLTFSVFDYDSALYDPLDVESSIVLEGQEYIVKNCVENFDTNTKNITAWHVYNEISRIYKRSDLTLNNNQDSNASKDQSYGVEDLLKAWIDGNKLGFSYEVHGNFDKQSTSKFDSGSGKEMLSKITELWPSAVIYPDNKKIRVYSEDEFYKDNGRVIDFPRDAKSVKTTRDSQSIINMIRCVGGKHEVQHTVYTGTGGTNANGPTEPVNGDWTPVIQYAASFYGIKPNDQQLNVLRAQIRLESGGNETIPQPGTDPDGDGSGPALGLLQFKRGTFNTYCREPYTNILKGFDQLIAFFNIPNALGQINGVTGWSPHGAPITKDKLIISPPNPWGWPFPDVGEGHFSLGQTFGTHPQDGVGR…	GTGAGGACAATTAGTTTAGTATTGATGACACCTCATAAAGAGACAACTAAGGAGCCAATTGGAGACATTATTCTATGGCCAACAATGCAAAGCGAGTGGTCTAAGAACTCAACCTTTCAATTAACCTTTTCAGTATTTGATTACGACTCAGCGTTGTATGATCCGTTAGATGTTGAAAGTTCGATTGTGCTTGAGGGACAGGAATATATTGTAAAAAATTGTGTTGAAAACTTTGATACGAACACGAAAAATATCACTGCCTGGCATGTTTACAATGAGATTAGTCGAATTTATAAACGAAGTGACCTTACCTTAAATAACAATCAGGATAGTAATGCTAGTAAGGATCAGTCTTATGGAGTTGAGGACTTACTAAAAGCATGGATTGATGGAAATAAG…
GCF_013487925.1	NZ_CP0474161.12953.AOI_02	64.3;Enterolysin_A	MEDKLIFKPSHLKSKVLSTLTVCGGALFLLSGNAAADDQTTDVQQPVTPQQTTNEQPNTSTIDVQTPNTYNGVAVSPQASEATQNTENYNVVPTQGNNQEVQHKEATQPQNPNNYGYLDSVSLSNNELQVSGWQATNQAEDKPYHYVIAYDNTAKAELGRQQVENVSRPDVAKVHSDATNAATSGFNSTIKLNTANEDYTNHSISVISRYSDAQNGEGNHVDYWYPAFTFDQGNYAWLDDMHTENDQLHVTGWNATNQASNKDYHYVILYNKTKGHELSRQLVDEKNSQRPDVQKVYQNVNNATKSGFNVTFDLSKLSFDASDQLQVISRYSDAQNGEGNRVDFWFAPTSRENQGNLDSANFSNGQLVVNGWHANDASTIAPNHFLILFDRTANKQAAS…	ATGGAGGACAAGCTTATTTTTAAACCTAGTCATTTAAAATCAAAAGTTTTATCTACTCTTACTGTATGTGGAGGAGCTTTATTCCTGTTAAGTGGGAATGCTGCTGCTGATGATCAAACAACTGATGTTCAACAACCAGTTACTCCTCAACAAACAACTAATGAACAACCAAATACATCCACAATTGATGTACAAACACCAAATACATATAACGGAGTAGCAGTTAGTCCACAAGCTAGTGAAGCTACTCAAAATACAGAAAATTATAATGTTGTTCCAACGCAGGGCAATAATCAAGAAGTACAACATAAAGAAGCAACTCAACCACAAAATCCCAACAATTATGGTTATTTAGATTCAGTTAGTTTATCAAACAACGAGTTGCAAGTTAGTGGTTGG…
GCF_022642805.1	NZ_CP0497601.19888.AOI_01	64.3;Enterolysin_A	VKELKKMMKAHLLAIISMIVGVVLSLFVLCMVILMMFGMDNGCDSETDTSQFNGVGGSGGIWTQKGTPAYKNAKDTFDFWVAKGMSGAQVAGIVGNIGGAEDTGFVLDQKELSGGSGGGLYQFTPYSKYLNDAKSDKSWSVQNQGEVVLHLEPDTIAAYFRKTKNSSPEDCATDWMNMYERPSAKAREKTNGARRAAARTAYQLFGGSNISGKDSLLGEAASTAGAGEAADQQNNSCDTSGGDTASGKWGWPFKTIPKDGPTRYENGQQYGHTGMIRGGGNDFHDGYDFGSAIVGAGQPILAVHDGKVFKVANDVGWWYVWVKSSDGYNEVYQEAFNGRGDIAVNEGDEIKVGDKIGTLSGSHLHLGITKKAITSSVQSGYSDDGTWLDPIKIIKEGINN	GTGAAGGAATTGAAAAAGATGATGAAAGCACATCTGCTTGCTATTATTTCAATGATTGTTGGCGTGGTTTTATCGTTATTTGTACTCTGCATGGTCATTTTAATGATGTTCGGTATGGATAACGGTTGTGACAGTGAGACTGACACAAGTCAATTCAACGGAGTAGGAGGCAGCGGTGGTATTTGGACTCAAAAGGGAACGCCAGCTTATAAAAATGCTAAAGATACTTTTGACTTTTGGGTTGCAAAAGGTATGTCGGGTGCACAGGTTGCTGGAATTGTTGGTAACATTGGTGGCGCTGAAGACACTGGATTTGTTCTTGATCAAAAAGAATTAAGCGGTGGCTCAGGTGGGGGCCTTTATCAATTTACGCCTTACAGTAAATATTTAAATGATGCT…
GCF_012275185.1	NZ_CP0511291.11459.AOI_01	63.3;Enterolysin_A	MIRDQVVLTNGLDNFSNTQGEAVDYSDLHDSFKVNYQLSSAYEISLTLTYTDQFAEAYKLAKMKRYVEYAYDDGTRQFFAIQQMEEGVDETGQPTLQITATHALIDLMKNIRIDPKQPTEDNPDVSGSGSDSSSDSSDDNKDNQQPGTTVTVKQTDVQQTYSLEEQLHKFIDNNDQGVKLAIYGTFPKMANEATGSLYEWLGSNLASYGAFWYPDGYTLRVYDLPSIQHRSDETFRYLNNMTKVDLQSDGNDLVNECWVYGGKVQKDITTVTATGGVSNGVTGAVNGDWTQAIKNAAAVSGIKVSDADINKIKGQIRLESGGDETIMGGTDGLADGRATGLLQFKPGTFNYYCRPPYTNIMKGFDQLIAFFNIPNAVGQISGGLSGWSPHGAPISKATI…	ATGATACGTGATCAAGTTGTTTTAACAAATGGACTGGATAATTTTTCTAATACGCAAGGAGAAGCAGTTGACTACAGCGACTTACACGACTCATTCAAAGTAAATTATCAGTTAAGCTCTGCTTACGAAATCTCACTTACATTAACCTATACAGACCAATTTGCGGAGGCTTATAAGCTAGCAAAGATGAAGCGATATGTTGAATACGCTTATGACGATGGGACTCGTCAATTCTTTGCAATTCAGCAAATGGAAGAGGGTGTTGATGAGACTGGTCAACCAACATTACAAATAACAGCTACTCATGCACTAATTGATTTAATGAAGAATATCCGAATAGACCCCAAACAGCCAACAGAAGACAATCCAGATGTTAGCGGTTCGGGGTCTGATAGTTCT…
GCF_012275185.1	NZ_CP0511291.11459.AOI_02	64.3;Enterolysin_A	MEDKLIFKPSHLKSKVLSTLTVCGGALFLLSGNAAADDQTTDVQQPVTPQQTTNEQPNTSTVDVQTPNTYNGVAVSPQASETTQNTENYNVVPTQDNNQEVQHKEATQPQNPNNYGYLDSISLSNNELQVSGWQATNQAADKPYHYVIAYDNTANTELGRQQVENVSRPDVAQAYPDATNADTSGFNSTIKLNTTNEDYTNHSISVVSRYSDATNGEGNHVDYWYPAFTFDQGNHAWLDDMHTENDQLHISGWNATNQATNKDYHYVILYDTTKGHELSRQLVDETTSQRPDVQKVYSNVNNAGKSGFNVTFDLSKLFFDASDQLQVISRYSNAENGEGDRVDYWFAPTSRENQGYLDSANFSNGQLVVNGWHANDASTIAPNHFLILFDQTAKKQAGV…	ATGGAGGACAAGCTTATTTTTAAACCTAGTCATTTAAAATCAAAAGTTTTATCTACTCTTACTGTATGTGGAGGAGCTTTATTCCTGTTAAGTGGAAATGCTGCTGCTGATGATCAAACAACTGATGTTCAACAACCAGTTACTCCTCAACAAACAACTAATGAACAACCAAATACATCTACGGTTGATGTACAAACACCAAATACATATAACGGAGTAGCAGTTAGTCCACAAGCTAGTGAAACTACTCAAAATACGGAAAATTATAATGTTGTTCCAACGCAGGACAATAATCAAGAAGTACAACATAAAGAAGCAACTCAACCACAAAATCCCAACAATTATGGTTATTTAGATTCAATTAGCTTATCAAACAACGAGTTGCAAGTTAGTGGTTGG…
GCF_013348825.1	NZ_CP0546571.12948.AOI_01	64.3;Enterolysin_A	VKELKKMMKAHLLAIISMIVGVVLSLFVLCMVILMMFGMDNGCDSETDTSQFNGVGGSGGIWTQKGTPAYKNAKDTFDFWVAKGMSGAQVAGIVGNIGGAEDTGFVLDQKELSGGSGGGLYQFTPYSKYLNDAKSDKSWSVQNQGEVVLHLEPDTIAAYFRKTKNSSPEDCATDWMNMYERPSAKAREKTNGARRAAARTAYQLFGGSNISGKDSLLGEAASTAGAGEAADQQNNSCDTSGGDTASGKWGWPFKTIPKDGPTRYENGQQYGHTGMIRGGGNDFHDGYDFGSAIVGAGQPILAVHDGKVFKIANDVGWWYVWVKSSDGYNEVYQEAFNSRGDITVNEGDEIKVGDKIGTLSGSHLHLGITKKAITSSVQSGYSDDGTWLDPIKIIKEGINN	GTGAAGGAATTGAAAAAGATGATGAAAGCACATCTGCTTGCTATTATTTCAATGATTGTTGGCGTGGTTTTATCGTTATTTGTACTCTGCATGGTCATTTTAATGATGTTCGGTATGGATAACGGTTGTGACAGTGAGACTGACACAAGTCAATTCAACGGAGTAGGAGGCAGCGGTGGTATTTGGACTCAAAAGGGAACGCCAGCTTATAAAAATGCTAAAGATACTTTTGACTTTTGGGTTGCAAAAGGTATGTCGGGTGCACAGGTTGCTGGAATTGTTGGTAACATTGGTGGCGCTGAAGACACTGGTTTTGTTCTTGATCAAAAAGAATTAAGCGGTGGCTCAGGTGGGGGCCTTTATCAATTTACGCCTTACAGTAAATATTTAAATGATGCT…
GCF_013694365.1	NZ_CP0592751.12954.AOI_01	63.3;Enterolysin_A	VYRIIGYNEPTDKAGFIVLDPRVNRHISSGKLTLKESNIDDLTITVNQASPLWDNVRPYHTHVNVYDDNELIFRGRAIKPKKSMEESGQFIREYVFEDIEAYLMDSTQRFYEGVGQTPKEFLQTLIDVHNSQVPDYKKFQLRNVNVTNNKDDQYRQIDYPKTSDAINDKLVKSLGGYIVTTYNPNGINYLDYLTDIGVDHKNDTPIQLAKNMKSASMQIDPTKVITRLIPLGKTLEPSKVDVSDDGGDGGSGSLDSPEEFCKSEINATWGSDINNMKQDFAARSSRVRAWGVDVNRLYDVVKNAEVSPEWFFAYELQEQGTYYGWLNHTYRHGDAYSDAQSVCEWIKNCSNSNSINPAWSAPEGSIAPNQALADKWNQEFGKGTIGRVYLQGTAAAVWD…	GTGTACCGAATTATTGGTTATAATGAGCCAACAGATAAAGCAGGATTTATTGTACTGGATCCCCGAGTTAATCGTCATATTAGTTCGGGGAAACTCACGCTTAAAGAATCCAACATTGATGATTTGACTATTACGGTTAATCAAGCAAGTCCATTATGGGACAACGTAAGGCCTTATCATACTCATGTTAACGTTTATGATGATAATGAACTTATTTTTCGTGGACGAGCTATCAAACCTAAAAAGTCGATGGAAGAAAGTGGACAATTCATTCGGGAATATGTTTTTGAAGATATTGAAGCATATCTTATGGATAGTACCCAACGATTTTATGAAGGTGTTGGGCAAACACCCAAAGAATTTTTACAGACTTTAATAGATGTTCATAATTCACAGGTT…
GCF_013694365.1	NZ_CP0592751.12954.AOI_02	63.3;Enterolysin_A	MTPHKETTKEPIGDIILWPTMQSEWSKNSTFQLTFSVFDYDSALYDPLDVESSIVLEGQEYIVKNCVENFDTNTKNITAWHVYNEISRIYKRSDLTLNNNQDSNASKDQSYGVEDLLKAWIDGNKLGFSYEVHGNFDKQSTPKFDSGSGKEMLSKITELWPSAVIYPDNKKIRVYSEDEFYKDNGRVIDFPRDAKSVKTTRDSQSIINMIRCVGGKHEVQHTVYTGTGGTNANGPTEPVNGDWTPVIQYAASLYGIKPNDQQLNVLRAQIRLESGGREDAQQPGADPDGDGSGPALGLLQFKQRTFNYYCREPYTNVKCGFDTLVTFFNIPNALGQINGVTGWSPHGAPITKDKLIISPPNPWGWPFPDVGEGHFSLGQTFGTHPQDGVGRTNGFHDGL…	ATGACACCTCATAAAGAGACAACTAAGGAGCCGATTGGAGACATTATTCTCTGGCCAACAATGCAAAGCGAATGGTCTAAGAATTCGACCTTTCAATTGACTTTCTCAGTATTTGACTATGATTCAGCATTGTATGATCCGCTAGATGTTGAAAGTTCGATTGTGCTTGAGGGACAGGAATATATCGTAAAAAATTGTGTTGAAAACTTTGATACGAACACGAAAAATATCACTGCCTGGCATGTCTATAATGAGATTAGTCGAATTTATAAACGAAGTGACCTTACCTTGAATAACAATCAGGATAGTAATGCTAGTAAGGATCAGTCTTATGGAGTTGAGGACTTACTAAAGGCATGGATTGATGGCAATAAGCTAGGCTTTAGCTATGAAGTTCAT…
GCF_016697045.1	NZ_CP0653181.13326.AOI_01	64.3;Enterolysin_A	MEDKLIFKPSHLKSKVLSTLTVCGGVLFLLSGNAAADDQTTDVQQPVTPQQTTNEQPNTSTIDVQTPNTYNGVAVSPQASEATQNTENYNVVPTQDNNQEVQHKEATQPQNPNNYGYLDSVSLSNNELQVSGWQATNQAADKPYHYVIAYDNTVNAELGRQQVENVSRPDVAQAYPDATNADNSGFNSTIKLNTTNEDYTNHSISVISRYSDATNGEGNHVDYWYPAFTFDQGNYAWLDDMHTENDQLHVSGWNATNQANNKDYHYVILYDTTKGHELSRQLVNETASQRPDVQKAYSNVNNAGKSGFNVTFDLSKLSFDASDQLQVISRYSNAENGEGDRVDYWFAPTSRENQGYLDSANFSNGQLVVNGWHANDASTIAPNHFLILFDRTANKQAAS…	ATGGAGGACAAGCTTATTTTTAAACCTAGTCATTTAAAATCAAAAGTTTTATCTACTCTTACTGTATGTGGAGGAGTTTTATTCCTGTTAAGTGGGAATGCTGCTGCTGATGATCAAACAACTGATGTTCAACAACCAGTTACTCCTCAACAAACAACTAATGAACAACCAAATACATCCACAATTGATGTACAAACACCAAATACATATAACGGAGTAGCAGTTAGTCCACAAGCTAGTGAAGCTACTCAAAATACAGAAAATTATAATGTTGTTCCAACGCAGGACAATAATCAAGAAGTACAACATAAAGAAGCAACTCAACCACAAAATCCCAACAATTATGGTTATTTAGATTCAGTTAGTTTATCAAACAACGAGTTGCAAGTTAGTGGTTGG…
[truncated: 529 more rows]

## Sheet: L_vaginalis
Assembly Accession	LOCUS	Bacteriocin (BAGEL4)	Sequences
[truncated: 56 more rows]
