# Supplementary material for: Genome-Resolved In Silico Analysis of Poultry and Swine Lactobacillales Provides a Data- Driven Framework for Elucidating Metabolic Synergies in Multi-Strain Probiotics
Source: Research Square preprint supplement (doi:10.21203/rs.3.rs-7234892/v1), 2025-08-12
Supplement: Supplementary file 7 [file acaef285e4232c5f7fff99e9.xlsx]

## Sheet: TS5
Reference	Target	Identity(%)	Coverage_ref(%)
WP_002391269.1	WP_002391269.1	100	100
WP_002391269.1	L_reuteriNZ_JANKBD0100000121.20004.AOI_01	50	44.3149
WP_002391269.1	L_reuteriNZ_CAJSZG0100000091.26517.AOI_01	48.2759	50.7289
WP_002391269.1	L_reuteriNZ_CAJSZW0100000101.26563.AOI_01	48.2759	50.7289
WP_002391269.1	L_reuteriNZ_CAJTCB0100000071.26656.AOI_01	48.2759	50.7289
WP_002391269.1	L_reuteriNZ_CAJTCN0100000071.26694.AOI_01	48.2759	50.7289
WP_002391269.1	L_reuteriNZ_CAJTHP0100000201.26760.AOI_01	48.2759	50.7289
WP_002391269.1	L_reuteriNZ_CP0296131.7971.AOI_01	48.2759	50.7289
WP_002391269.1	L_reuteriNZ_CP0296151.7972.AOI_01	48.2759	50.7289
WP_002391269.1	L_reuteriNZ_CP0653301.19496.AOI_01	48.2759	50.7289
WP_002391269.1	L_reuteriNZ_CP0655401.13426.AOI_01	48.2759	50.7289
WP_002391269.1	L_reuteriNZ_CP0658511.19503.AOI_01	48.2759	50.7289
WP_002391269.1	L_reuteriNZ_JAJGTL0100001171.14506.AOI_01	48.2759	50.7289
WP_002391269.1	L_reuteriNZ_JAJGTM0100001261.14258.AOI_01	48.2759	50.7289
WP_002391269.1	L_reuteriNZ_JAJGTN0100001141.14417.AOI_01	48.2759	50.7289
WP_002391269.1	L_reuteriNZ_JAJGUB0100000791.14925.AOI_01	48.2759	50.7289
WP_002391269.1	L_reuteriNZ_JAJGUD0100002181.15018.AOI_01	48.2759	50.7289
WP_002391269.1	L_reuteriNZ_JAJGUK0100001151.15367.AOI_01	48.2759	50.7289
WP_002391269.1	L_reuteriNZ_JAJGUL0100001201.15447.AOI_01	48.2759	50.7289
WP_002391269.1	L_reuteriNZ_JAJGUP0100001241.15772.AOI_01	48.2759	50.7289
WP_002391269.1	L_reuteriNZ_JAJGUX0100001001.16267.AOI_01	48.2759	50.7289
WP_002391269.1	L_reuteriNZ_JAJGUY0100002141.16146.AOI_01	48.2759	50.7289
WP_002391269.1	L_reuteriNZ_JAJGUZ0100000811.16557.AOI_01	48.2759	50.7289
WP_002391269.1	L_reuteriNZ_JAJGWO0100000151.19483.AOI_01	48.2759	50.7289
WP_002391269.1	L_reuteriNZ_MIMF010003921.1983.AOI_01	48.2759	50.7289
WP_002391269.1	L_reuteriNZ_MIMH010001061.2026.AOI_01	48.2759	50.7289
WP_002391269.1	L_reuteriNZ_MIMV010000331.3188.AOI_01	48.2759	50.7289
WP_002391269.1	L_reuteriNZ_NFHN010000031.3429.AOI_01	48.2759	50.7289
WP_002391269.1	L_reuteriNZ_NFKV010000031.3459.AOI_01	48.2759	50.7289
WP_002391269.1	L_reuteriNZ_JAFFPO0100000151.19814.AOI_01	48.2759	50.7289
WP_002391269.1	L_reuteriNZ_WJMZ010000021.10916.AOI_01	48.2759	50.7289
WP_002391269.1	L_reuteriNZ_JAOPJB0100000011.20870.AOI_01	48.2759	50.7289
WP_002391269.1	L_reuteriNZ_LN8876871.5728.AOI_01	48.2759	50.7289
WP_002391269.1	L_reuteriNZ_RINS010000901.20502.AOI_01	48.2759	50.7289
WP_002391269.1	L_reuteriNZ_MWIJ010000271.3319.AOI_01	48.2759	50.7289
WP_002391269.1	L_reuteriNZ_JAJGVQ0100000491.17520.AOI_01	48.2759	50.7289
WP_002391269.1	L_reuteriNZ_JAJGVR0100001331.17686.AOI_01	48.2759	50.7289
WP_002391269.1	L_reuteriNZ_CP0147861.342.AOI_01	48.2759	50.7289
WP_002391269.1	L_reuteriNZ_CP0497601.19888.AOI_01	48.2353	49.5627
WP_002391269.1	L_reuteriNZ_JAJGVU0100000811.18291.AOI_01	48.2353	49.5627
WP_002391269.1	L_reuteriNZ_JAJGVV0100000361.17858.AOI_01	48.2353	49.5627
WP_002391269.1	L_reuteriNZ_JAJGVY0100002721.18187.AOI_01	48.2353	49.5627
WP_002391269.1	L_reuteriNZ_JAYFHM0100000191.25007.AOI_01	48.2353	49.5627
WP_002391269.1	L_reuteriNZ_JAYFHN0100000641.24678.AOI_01	48.2353	49.5627
WP_002391269.1	L_reuteriNZ_JAYFHO0100000161.24810.AOI_01	48.2353	49.5627
WP_002391269.1	L_reuteriNZ_JAYFHQ0100000361.24368.AOI_01	48.2353	49.5627
WP_002391269.1	L_reuteriNZ_JAYFHR0100000221.24261.AOI_01	48.2353	49.5627
WP_002391269.1	L_reuteriNZ_JAYFHS0100000631.23822.AOI_01	48.2353	49.5627
WP_002391269.1	L_reuteriNZ_JAYFHT0100000151.23615.AOI_01	48.2353	49.5627
WP_002391269.1	L_reuteriNZ_JAYFHU0100000151.23421.AOI_01	48.2353	49.5627
WP_002391269.1	L_reuteriNZ_JAYFHV0100000211.23532.AOI_01	48.2353	49.5627
WP_002391269.1	L_reuteriNZ_JAYFHW0100000801.23207.AOI_01	48.2353	49.5627
WP_002391269.1	L_reuteriNZ_JAYFHY0100000661.22871.AOI_01	48.2353	49.5627
WP_002391269.1	L_reuteriNZ_JAYFHZ0100000721.22757.AOI_01	48.2353	49.5627
WP_002391269.1	L_reuteriNZ_JAYFIG0100000051.21697.AOI_01	48.2353	49.5627
WP_002391269.1	L_reuteriNZ_JAYFIH0100000051.21568.AOI_01	48.2353	49.5627
WP_002391269.1	L_reuteriNZ_RINO010000121.20159.AOI_01	48.2353	49.5627
WP_002391269.1	L_reuteriNZ_RINP010000831.20328.AOI_01	48.2353	49.5627
WP_002391269.1	L_reuteriNZ_QKQN010000021.10505.AOI_01	48.2353	49.5627
WP_002391269.1	L_reuteriNZ_QKQO010000021.10596.AOI_01	48.2353	49.5627
WP_002391269.1	L_reuteriNZ_JAYFHX0100000711.23092.AOI_01	48.2353	49.5627
WP_002391269.1	L_reuteriNZ_JAYFIC0100000611.22201.AOI_01	48.2353	49.5627
WP_002391269.1	L_reuteriNZ_JAYFID0100000521.22029.AOI_01	48.2353	49.5627
WP_002391269.1	L_reuteriNZ_JAYFIE0100000631.21947.AOI_01	48.2353	49.5627
WP_002391269.1	L_reuteriNZ_CP0546571.12948.AOI_01	48.2353	49.5627
WP_002391269.1	L_reuteriNZ_JAYFIA0100000221.22540.AOI_01	48.2353	49.5627
WP_002391269.1	L_reuteriNZ_NGPU010000811.5055.AOI_01	48.2353	49.5627
WP_002391269.1	L_reuteriNZ_NGPW010000551.4930.AOI_01	48.2353	49.5627
WP_002391269.1	L_reuteriNZ_NGPX010000901.5128.AOI_01	48.2353	49.5627
WP_002391269.1	L_reuteriNZ_NGPY010000441.4985.AOI_01	48.2353	49.5627
WP_002391269.1	L_reuteriNZ_NGPZ010000911.5170.AOI_01	48.2353	49.5627
WP_002391269.1	L_reuteriNZ_NGQA010000771.5267.AOI_01	48.2353	49.5627
WP_002391269.1	L_reuteriNZ_NGQB010000551.5201.AOI_01	48.2353	49.5627
WP_002391269.1	L_reuteriNZ_JAJGTE0100000741.13906.AOI_01	41.3408	52.1866
WP_002391269.1	L_reuteriNZ_JAJGWL0100001391.19111.AOI_01	41.3408	52.1866
WP_002391269.1	E_lactisNZ_JARAOS0100001231.8927.AOI_01	39.8601	41.691
WP_002391269.1	E_lactisNZ_JAENKN0100000281.538.AOI_01	39.8601	41.691
WP_002391269.1	E_lactisNZ_JAQDSF0100000261.8761.AOI_01	39.8601	41.691
WP_002391269.1	E_lactisNZ_JAIFNR0100000581.4036.AOI_01	39.5973	43.4402
WP_002391269.1	E_lactisNZ_JAIFNT0100000061.3795.AOI_01	39.5973	43.4402
WP_002391269.1	E_lactisNZ_BNJW010000231.350.AOI_01	38.9262	43.4402
WP_002391269.1	E_lactisNZ_JACEIT0100000221.323.AOI_01	38.9262	43.4402
WP_002391269.1	E_lactisNZ_JADZMB0100000181.510.AOI_01	38.9262	43.4402
WP_002391269.1	E_lactisNZ_JAUSWI0100000221.13297.AOI_01	38.9262	43.4402
WP_002391269.1	E_lactisNZ_WOTS010000211.276.AOI_01	38.9262	43.4402
WP_002391269.1	E_lactisNZ_CP0842471.4163.AOI_02	38.9262	43.4402
WP_002391269.1	E_lactisNZ_JAIFOD0100000021.3127.AOI_01	38.9262	43.4402
WP_002391269.1	E_lactisNZ_JAIFOE0100000691.3353.AOI_01	38.9262	43.4402
WP_002391269.1	E_lactisNZ_PGPI010000201.1179.AOI_01	38.9262	43.4402
WP_002391269.1	E_lactisNZ_PGPJ010000211.1146.AOI_01	38.9262	43.4402
WP_002391269.1	E_lactisNZ_JAGPYO0100000201.1334.AOI_01	38.9262	43.4402
WP_002391269.1	E_lactisNZ_JAFLIL0100000301.2435.AOI_01	38.9262	43.4402
WP_002391269.1	E_lactisNZ_JAIZEY0100000201.4170.AOI_02	38.9262	43.4402
WP_002391269.1	E_lactisNZ_JAIZXH0100000221.11200.AOI_01	38.9262	43.4402
WP_002391269.1	E_lactisNZ_JAJAOH0100000141.5101.AOI_02	38.9262	43.4402
WP_002391269.1	E_lactisNZ_PGPK010000231.1049.AOI_01	38.9262	43.4402
WP_002391269.1	E_lactisNZ_PGQJ010000261.744.AOI_02	38.9262	43.4402
WP_002391269.1	E_lactisNZ_JAIZYI0100000201.9182.AOI_01	38.9262	43.4402
WP_002391269.1	E_lactisNZ_PGPM010000211.974.AOI_01	38.9262	43.4402
WP_002391269.1	E_lactisNZ_PGPO010000231.859.AOI_01	38.9262	43.4402
WP_002391269.1	E_lactisNZ_JAQEOI0100000421.6789.AOI_01	38.9262	43.4402
WP_002391269.1	E_lactisNZ_JAQEOR0100000221.6940.AOI_01	38.9262	43.4402
WP_002391269.1	E_lactisNZ_JAQEPV0100000201.6192.AOI_01	38.9262	43.4402
WP_002391269.1	E_lactisNZ_CP0780951.2881.AOI_03	38.9262	43.4402
WP_002391269.1	E_lactisNZ_WOTR010000231.103.AOI_01	38.9262	43.4402
WP_002391269.1	E_lactisNZ_CP0822661.4157.AOI_02	38.9262	43.4402
WP_002391269.1	E_lactisNZ_JAFLIN0100000491.2339.AOI_01	38.9262	43.4402
WP_002391269.1	E_lactisNZ_JAFLIO0100000421.2244.AOI_02	38.9262	43.4402
WP_002391269.1	E_lactisNZ_JAFLIV0100000291.1889.AOI_01	38.9262	43.4402
WP_002391269.1	E_lactisNZ_JAIFNS0100000011.3976.AOI_02	38.9262	43.4402
WP_002391269.1	E_lactisNZ_JAIFOF0100000691.3045.AOI_01	38.9262	43.4402
WP_002391269.1	E_lactisNZ_JAIFOH0100000431.2964.AOI_01	38.9262	43.4402
WP_002391269.1	E_lactisNZ_JARQAW0100000251.13359.AOI_01	38.9262	43.4402
WP_002391269.1	E_lactisNZ_JARQBE0100000171.13418.AOI_02	38.9262	43.4402
WP_002391269.1	E_lactisNZ_JAWKDV0100000161.13696.AOI_02	38.9262	43.4402
WP_002391269.1	E_lactisNZ_WOTQ010000211.136.AOI_02	38.9262	43.4402
WP_002391269.1	E_lactisNZ_CP1298881.13038.AOI_02	38.9262	43.4402
WP_002391269.1	E_lactisNZ_JAENKN0100000241.550.AOI_02	38.9262	43.4402
WP_002391269.1	E_lactisNZ_JAIZEX0100000171.4305.AOI_01	38.9262	43.4402
WP_002391269.1	E_lactisNZ_JAIZYG0100000191.9546.AOI_01	38.9262	43.4402
WP_002391269.1	E_lactisNZ_JAIZYH0100000271.9663.AOI_01	38.9262	43.4402
WP_002391269.1	E_lactisNZ_JAIZYJ0100000201.9433.AOI_01	38.9262	43.4402
WP_002391269.1	E_lactisNZ_JAIZYM0100000201.9376.AOI_01	38.9262	43.4402
WP_002391269.1	E_lactisNZ_JAMRMO0100000151.13753.AOI_02	38.9262	43.4402
WP_002391269.1	E_lactisNZ_JARRZA0100000201.12487.AOI_01	38.9262	43.4402
WP_002391269.1	E_lactisNZ_JARRZB0100000201.12546.AOI_02	38.9262	43.4402
WP_002391269.1	E_lactisNZ_JAFLJB0100000271.1550.AOI_02	38.9262	43.4402
WP_002391269.1	E_lactisNZ_PGQL010000201.817.AOI_02	38.9262	43.4402
WP_002391269.1	E_lactisNZ_PGQM010000261.604.AOI_02	38.9262	43.4402
WP_002391269.1	E_lactisNZ_JAQEGE0100000181.5694.AOI_01	38.9262	43.4402
WP_002391269.1	E_lactisNZ_JAQEKD0100000201.7622.AOI_01	38.9262	43.4402
WP_002391269.1	E_lactisNZ_JBBNPR0100000221.14139.AOI_01	38.9262	43.4402
WP_002391269.1	E_lactisNZ_JAFLIB0100000161.2848.AOI_01	38.9262	43.4402
WP_002391269.1	E_lactisNZ_JAIZWO0100000181.12231.AOI_01	38.9262	43.4402
WP_002391269.1	E_lactisNZ_JAIZWR0100000161.12035.AOI_01	38.9262	43.4402
WP_002391269.1	E_lactisNZ_JAMOBR0100000021.5201.AOI_02	38.9262	43.4402
WP_002391269.1	E_lactisNZ_JAQEJJ0100000211.7687.AOI_01	38.9262	43.4402
WP_002391269.1	E_lactisNZ_JAQELE0100000221.7584.AOI_01	38.9262	43.4402
WP_002391269.1	E_lactisNZ_JAIZWV0100000181.11808.AOI_02	38.9262	43.4402
WP_002391269.1	E_lactisNZ_JAQEPM0100000191.6552.AOI_01	38.9262	43.4402
WP_002391269.1	E_lactisNZ_JAIZYB0100000141.10062.AOI_01	38.9262	43.4402
WP_002391269.1	E_lactisNZ_JAIZYC0100000411.10180.AOI_01	38.9262	43.4402
WP_002391269.1	E_lactisNZ_JAIZWQ0100000151.12153.AOI_01	38.9262	43.4402
WP_002391269.1	E_lactisNZ_JAIZFG0100000211.4259.AOI_02	38.9262	43.4402
WP_002391269.1	E_lactisNZ_JAQDSF0100000211.8704.AOI_01	38.9262	43.4402
WP_002391269.1	E_lactisNZ_JANQBF0100000221.8818.AOI_01	38.9262	43.4402
WP_002391269.1	E_lactisNZ_JAQCTO0100000221.7799.AOI_01	38.9262	43.4402
WP_002391269.1	E_lactisNZ_JARRYI0100000171.12322.AOI_01	38.9262	43.4402
WP_002391269.1	E_lactisNZ_JARRYJ0100000171.12848.AOI_01	38.9262	43.4402
WP_002391269.1	E_lactisNZ_JARRYP0100000401.12712.AOI_01	38.9262	43.4402
WP_002391269.1	E_lactisNZ_JARRYV0100000381.12942.AOI_01	38.9262	43.4402
WP_002391269.1	E_lactisNZ_JAMYDK0100000261.5427.AOI_01	38.9262	43.4402
WP_002391269.1	E_lactisNZ_JARQBH0100000231.13498.AOI_01	38.9262	43.4402
WP_002391269.1	E_lactisNZ_JAIZXI0100000201.11169.AOI_01	38.9262	43.4402
WP_002391269.1	E_lactisNZ_JAQENY0100000441.7431.AOI_01	38.9262	43.4402
WP_002391269.1	E_lactisNZ_JAIFNV0100000151.3745.AOI_01	38.9262	43.4402
WP_002391269.1	E_lactisNZ_JAIFOB0100000481.3290.AOI_01	38.9262	43.4402
WP_002391269.1	E_lactisNZ_JAJQWS0100000141.4988.AOI_01	38.9262	43.4402
WP_002391269.1	E_lactisNZ_JARQBK0100000151.13458.AOI_01	38.9262	43.4402
WP_002391269.1	E_lactisNZ_JARQBL0100000151.13551.AOI_01	38.9262	43.4402
WP_002391269.1	E_lactisNZ_BNJY010000181.434.AOI_01	38.9262	43.4402
WP_002391269.1	E_lactisNZ_CP1236101.13706.AOI_01	38.9262	43.4402
WP_002391269.1	E_lactisNZ_CP1236121.13708.AOI_01	38.9262	43.4402
WP_002391269.1	E_lactisNZ_CP1236141.13801.AOI_01	38.9262	43.4402
WP_002391269.1	E_lactisNZ_JAFLIC0100000181.2753.AOI_01	38.9262	43.4402
WP_002391269.1	E_lactisNZ_JAFLID0100000161.2785.AOI_01	38.9262	43.4402
WP_002391269.1	E_lactisNZ_JAFLIF0100000181.2667.AOI_01	38.9262	43.4402
WP_002391269.1	E_lactisNZ_JAFLIM0100000161.2275.AOI_01	38.9262	43.4402
WP_002391269.1	E_lactisNZ_JAQDMQ0100000201.5668.AOI_01	38.9262	43.4402
WP_002391269.1	E_lactisNZ_JBFTFI0100000151.14283.AOI_01	38.9262	43.4402
WP_002391269.1	E_lactisNZ_PGPQ010000201.782.AOI_01	38.9262	43.4402
WP_002391269.1	E_lactisNZ_PGPR010000191.664.AOI_01	38.9262	43.4402
WP_002391269.1	E_lactisNZ_SWBS010000221.16.AOI_01	38.9262	43.4402
WP_002391269.1	E_lactisNZ_CP0842451.4164.AOI_01	38.9262	43.4402
WP_002391269.1	E_lactisNZ_JARRYT0100000131.12561.AOI_01	38.9262	43.4402
WP_002391269.1	E_lactisNZ_CP0798811.2882.AOI_01	38.255	43.4402
WP_002391269.1	E_lactisNZ_JAFLIJ0100000221.2482.AOI_01	38.255	43.4402
WP_002391269.1	E_lactisNZ_JAFLIW0100000451.1728.AOI_02	38.255	43.4402
WP_002391269.1	E_lactisNZ_JAIFNQ0100000971.3920.AOI_01	38.255	43.4402
WP_002391269.1	E_lactisNZ_JAIZWP0100000731.12022.AOI_01	38.255	43.4402
WP_002391269.1	E_lactisNZ_JAIZWS0100000171.12270.AOI_02	38.255	43.4402
WP_002391269.1	E_lactisNZ_JAQCTL0100000241.7850.AOI_01	38.255	43.4402
WP_002391269.1	E_lactisNZ_JAQEOF0100000561.7098.AOI_01	38.255	43.4402
WP_002391269.1	E_lactisNZ_JAVBZS0100000361.13161.AOI_02	38.255	43.4402
WP_002391269.1	E_lactisNZ_JAVBZT0100000221.13252.AOI_02	38.255	43.4402
WP_002391269.1	E_lactisNZ_JBCNWE0100000511.13834.AOI_01	38.255	43.4402
WP_002391269.1	E_lactisNZ_JBCNWI0100000451.14081.AOI_01	38.255	43.4402
WP_002391269.1	E_lactisNZ_JAIZXF0100000161.11336.AOI_01	38.255	43.4402
WP_002391269.1	E_lactisNZ_JAIZXU0100000151.10505.AOI_01	38.255	43.4402
WP_002391269.1	E_lactisNZ_JAIZXW0100000171.10381.AOI_01	38.255	43.4402
WP_002391269.1	E_lactisNZ_CP1434341.13800.AOI_03	38.255	43.4402
WP_002391269.1	E_lactisNZ_JAFLJA0100000191.1686.AOI_01	38.255	43.4402
WP_002391269.1	E_lactisNZ_JAIZXM0100000151.10943.AOI_01	38.255	43.4402
WP_002391269.1	E_lactisNZ_JAIZWU0100000221.11933.AOI_01	38.255	43.4402
WP_002391269.1	E_lactisNZ_JAIZFC0100000211.4425.AOI_02	38.255	43.4402
WP_002391269.1	E_lactisNZ_JAIZFL0100000211.4632.AOI_02	38.255	43.4402
WP_002391269.1	E_lactisNZ_JAIZFM0100000211.4419.AOI_02	38.255	43.4402
WP_002391269.1	E_lactisNZ_JAIZFN0100000211.4353.AOI_02	38.255	43.4402
WP_002391269.1	E_lactisNZ_JAIZFO0100000211.4549.AOI_02	38.255	43.4402
WP_002391269.1	E_lactisNZ_JAIZFP0100000211.4522.AOI_02	38.255	43.4402
WP_002391269.1	E_lactisNZ_JAIZXK0100000201.10986.AOI_02	38.255	43.4402
WP_002391269.1	E_lactisNZ_JAIZXL0100000191.11039.AOI_02	38.255	43.4402
WP_002391269.1	E_lactisNZ_JAIZXO0100000241.10850.AOI_01	38.255	43.4402
WP_002391269.1	E_lactisNZ_JAIZXP0100000211.10673.AOI_02	38.255	43.4402
WP_002391269.1	E_lactisNZ_JAIZXS0100000191.10610.AOI_02	38.255	43.4402
WP_002391269.1	E_lactisNZ_JAIZXT0100000251.10437.AOI_02	38.255	43.4402
WP_002391269.1	E_lactisNZ_JAIZYF0100000331.9812.AOI_01	38.255	43.4402
WP_002391269.1	E_lactisNZ_JAMDJM0100000211.5254.AOI_01	38.255	43.4402
WP_002391269.1	E_lactisNZ_JAQCRF0100000151.8112.AOI_02	38.255	43.4402
WP_002391269.1	E_lactisNZ_JAQEFO0100000181.5792.AOI_01	38.255	43.4402
WP_002391269.1	E_lactisNZ_JAQENZ0100000411.7277.AOI_01	38.255	43.4402
WP_002391269.1	E_lactisNZ_JAQEOK0100000331.6771.AOI_01	38.255	43.4402
WP_002391269.1	E_lactisNZ_JAQFBA0100000161.8401.AOI_02	38.255	43.4402
WP_002391269.1	E_lactisNZ_JAQFBF0100000161.8388.AOI_02	38.255	43.4402
WP_002391269.1	E_lactisNZ_JAVLSA0100000191.13616.AOI_01	38.255	43.4402
WP_002391269.1	E_lactisNZ_JBFSLT0100000201.14331.AOI_01	38.255	43.4402
WP_002391269.1	E_lactisNZ_JAVGUY0100000231.13351.AOI_02	38.255	43.4402
WP_002391269.1	E_lactisNZ_JAQCRB0100000241.8138.AOI_01	38.255	43.4402
WP_002391269.1	E_lactisNZ_JAIZXV0100000171.10305.AOI_01	38.255	43.4402
WP_002391269.1	E_lactisNZ_JAIZYD0100000171.9777.AOI_01	38.255	43.4402
WP_002391269.1	E_lactisNZ_JAIZYE0100000191.9602.AOI_01	38.255	43.4402
WP_002391269.1	E_lactisNZ_JAJUKM0100000231.9106.AOI_01	38.255	43.4402
WP_002391269.1	E_lactisNZ_JAMYDM0100000311.5511.AOI_01	38.255	43.4402
WP_002391269.1	E_lactisNZ_JAMYDN0100000311.5600.AOI_01	38.255	43.4402
WP_002391269.1	E_lactisNZ_JAQCRG0100000201.8047.AOI_01	38.255	43.4402
WP_002391269.1	E_lactisNZ_JANDLX0100000211.5351.AOI_01	38.255	43.4402
WP_002391269.1	E_lactisNZ_JAGMTW0100000201.1304.AOI_02	38.255	43.4402
WP_002391269.1	E_lactisNZ_JAQCQZ0100000231.8214.AOI_02	38.255	43.4402
WP_002391269.1	E_lactisNZ_JAIZWT0100000211.11652.AOI_02	38.255	43.4402
WP_002391269.1	E_lactisNZ_JAQDYI0100000241.5985.AOI_02	38.255	43.4402
WP_002391269.1	E_lactisNZ_JAQEOB0100000371.7357.AOI_01	38.255	43.4402
WP_002391269.1	E_lactisNZ_JAQCPP0100000261.8318.AOI_01	38.255	43.4402
WP_002391269.1	E_lactisNZ_JAQCPZ0100000231.8246.AOI_01	38.255	43.4402
WP_002391269.1	E_lactisNZ_JAQCWI0100000251.7777.AOI_01	38.255	43.4402
WP_002391269.1	E_lactisNZ_JAQEBH0100000251.5924.AOI_01	38.255	43.4402
WP_002391269.1	E_lactisNZ_JAQEBL0100000211.5892.AOI_01	38.255	43.4402
WP_002391269.1	E_lactisNZ_JAQEFE0100000221.5864.AOI_01	38.255	43.4402
WP_002391269.1	E_lactisNZ_JAQEFU0100000221.5756.AOI_01	38.255	43.4402
WP_002391269.1	E_lactisNZ_JAQEWC0100000241.8692.AOI_01	38.255	43.4402
WP_002391269.1	E_lactisNZ_JAQEXP0100000251.8610.AOI_01	38.255	43.4402
WP_002391269.1	E_lactisNZ_JAQEXS0100000251.8563.AOI_01	38.255	43.4402
WP_002391269.1	E_lactisNZ_JAQEXY0100000201.8499.AOI_01	38.255	43.4402
WP_002391269.1	E_lactisNZ_JAQFAY0100000231.8487.AOI_01	38.255	43.4402
WP_002391269.1	E_lactisNZ_JAFDUG0100000011.1233.AOI_02	38.255	43.4402
WP_002391269.1	E_lactisNZ_JAIFNQ0100000661.3946.AOI_01	38.255	43.4402
WP_002391269.1	E_lactisNZ_JACWMD0100000591.4815.AOI_01	38.255	43.4402
WP_002391269.1	E_lactisNZ_JAMRMP0100000101.13726.AOI_01	38.255	43.4402
WP_002391269.1	E_lactisNZ_CP0829641.4161.AOI_01	38.255	43.4402
WP_002391269.1	E_lactisNZ_JAIZXD0100000221.11473.AOI_01	38.255	43.4402
WP_002391269.1	E_lactisNZ_JAIZXE0100000201.11277.AOI_01	38.255	43.4402
WP_002391269.1	E_lactisNZ_JAIZXQ0100000211.10784.AOI_01	38.255	43.4402
WP_002391269.1	E_lactisNZ_JAIZXR0100000341.10738.AOI_01	38.255	43.4402
WP_002391269.1	E_lactisNZ_JAQDWR0100000151.6138.AOI_01	38.255	43.4402
WP_002391269.1	E_lactisNZ_JAIZWW0100000271.11733.AOI_01	38.255	43.4402
WP_002391269.1	E_lactisNZ_JAIZXA0100000271.11593.AOI_01	38.255	43.4402
WP_002391269.1	E_lactisNZ_JASGSE0100000181.13022.AOI_01	37.5839	43.4402
WP_002391269.1	E_lactisNZ_JAIZXJ0100000191.11133.AOI_01	37.5839	43.4402
WP_002391269.1	L_reuteriNZ_WHOJ010000081.11367.AOI_01	36.0215	54.2274
WP_002391269.1	L_reuteriNZ_PUXG010000251.8114.AOI_01	35.5422	48.3965
WP_002391269.1	L_reuteriNZ_SRKR010000131.8384.AOI_01	35.5422	48.3965
WP_002391269.1	L_reuteriNZ_WLWA010000111.11135.AOI_01	35.5422	48.3965
WP_002391269.1	L_reuteriNZ_WLWB010000111.11240.AOI_01	35.5422	48.3965
WP_002391269.1	L_reuteriNZ_WLWC010000101.11216.AOI_01	35.5422	48.3965
WP_002391269.1	L_vaginalisNZ_JAUDDT0100000121.1518.AOI_01	35.4037	46.9388
WP_002391269.1	L_reuteriNZ_RINV010000691.20843.AOI_01	35	46.6472
WP_002391269.1	L_reuteriNZ_RINW010000491.20763.AOI_01	35	46.6472
WP_002391269.1	L_reuteriNZ_JASTWC0100000031.21218.AOI_01	34.9398	48.3965
WP_002391269.1	L_reuteriNZ_JAJGTB0100001121.13879.AOI_01	34.9398	48.3965
WP_002391269.1	L_reuteriNZ_JAFFPO0100000411.19799.AOI_01	34.9398	48.3965
WP_002391269.1	L_reuteriNZ_WJMZ010000061.10899.AOI_01	34.9398	48.3965
WP_002391269.1	L_reuteriNZ_PTLS010000491.8070.AOI_01	34.9398	48.3965
WP_002391269.1	L_reuteriNZ_JAHLNX0100000361.13483.AOI_01	34.9398	48.3965
WP_002391269.1	L_reuteriNZ_JAJGUK0100000841.15405.AOI_01	34.9398	48.3965
WP_002391269.1	L_reuteriNZ_JAJGUL0100000911.15450.AOI_01	34.9398	48.3965
WP_002391269.1	L_reuteriNZ_CAJSZG0100000261.26531.AOI_01	34.9398	48.3965
WP_002391269.1	L_reuteriNZ_CAJSZW0100000261.26606.AOI_01	34.9398	48.3965
WP_002391269.1	L_reuteriNZ_CAJTCB0100000281.26632.AOI_01	34.9398	48.3965
WP_002391269.1	L_reuteriNZ_CAJTCN0100000271.26699.AOI_01	34.9398	48.3965
WP_002391269.1	L_reuteriNZ_CAJTHP0100000281.26752.AOI_01	34.9398	48.3965
WP_002391269.1	L_reuteriNZ_SRYI010000231.8528.AOI_01	34.9398	48.3965
WP_002391269.1	L_reuteriNZ_WJMY010000211.10753.AOI_01	34.9398	48.3965
WP_002391269.1	L_reuteriNZ_CALNWZ0100000441.26925.AOI_01	34.9398	48.3965
WP_002391269.1	L_reuteriNZ_JAHQZV0100000201.13655.AOI_01	34.9398	48.3965
WP_002391269.1	L_reuteriNZ_QGHV010000931.6414.AOI_01	34.9398	48.3965
WP_002391269.1	L_reuteriNZ_QGHW010000491.6527.AOI_01	34.9398	48.3965
WP_002391269.1	L_reuteriNZ_JAOTNP0100000591.21238.AOI_01	34.9398	48.3965
WP_002391269.1	L_reuteriNZ_JAQOWD0100001001.21033.AOI_01	34.9398	48.3965
WP_002391269.1	L_reuteriNZ_JBCJKA0100000491.26125.AOI_01	34.9398	48.3965
WP_002391269.1	L_reuteriNZ_QGHO010000871.7165.AOI_01	34.9398	48.3965
WP_002391269.1	L_reuteriNZ_RINS010000911.20553.AOI_01	34.9398	48.3965
WP_002391269.1	L_reuteriNZ_RINT010000411.20614.AOI_01	34.9398	48.3965
WP_002391269.1	L_reuteriNZ_RINU010001571.20721.AOI_01	34.9398	48.3965
WP_002391269.1	L_reuteriNZ_VKOD010000451.8576.AOI_01	34.9398	48.3965
WP_002391269.1	L_reuteriNZ_WHOJ010000761.11419.AOI_01	34.9398	48.3965
WP_002391269.1	L_reuteriNZ_JAQSGB0100000041.25508.AOI_01	34.9398	48.3965
WP_002391269.1	L_reuteriNZ_JAQSGE0100000171.25188.AOI_01	34.9398	48.3965
WP_002391269.1	L_reuteriNZ_JAQSGF0100000171.25083.AOI_01	34.9398	48.3965
WP_002391269.1	L_reuteriNZ_JAQSGG0100000171.25140.AOI_01	34.9398	48.3965
WP_002391269.1	L_reuteriNZ_JAQSGH0100000171.25262.AOI_01	34.9398	48.3965
WP_002391269.1	L_reuteriNZ_JAVCBC0100000171.25770.AOI_01	34.9398	48.3965
WP_002391269.1	L_reuteriNZ_JAVCBH0100000181.25573.AOI_01	34.9398	48.3965
WP_002391269.1	L_reuteriNZ_JAJGUS0100000951.15982.AOI_01	34.9398	48.3965
WP_002391269.1	L_reuteriNZ_JAYFHN0100000391.24666.AOI_01	34.9398	48.3965
WP_002391269.1	L_reuteriNZ_JAYFHR0100000651.24260.AOI_01	34.9398	48.3965
WP_002391269.1	L_reuteriNZ_JAYFHS0100000781.23929.AOI_01	34.9398	48.3965
WP_002391269.1	L_reuteriNZ_JAYFHW0100000721.23306.AOI_01	34.9398	48.3965
WP_002391269.1	L_reuteriNZ_JAYFHY0100000741.22853.AOI_01	34.9398	48.3965
WP_002391269.1	L_reuteriNZ_JAYFHZ0100000791.22640.AOI_01	34.9398	48.3965
WP_002391269.1	L_reuteriNZ_JAYFIB0100000931.22419.AOI_01	34.9398	48.3965
WP_002391269.1	L_reuteriNZ_JAYFIF0100000861.21683.AOI_01	34.9398	48.3965
WP_002391269.1	L_reuteriNZ_JAYFIG0100000711.21717.AOI_01	34.9398	48.3965
WP_002391269.1	L_reuteriNZ_JAJGTF0100001141.13977.AOI_01	34.9398	48.3965
WP_002391269.1	L_reuteriNZ_JBCLUD0100000211.26229.AOI_01	34.9398	48.3965
WP_002391269.1	L_reuteriNZ_JAQSGD0100000191.25353.AOI_01	34.9398	48.3965
WP_002391269.1	L_reuteriNZ_VRYM010000131.11900.AOI_01	34.9398	48.3965
WP_002391269.1	L_reuteriNZ_VTTA010000341.11803.AOI_01	34.9398	48.3965
WP_002391269.1	L_reuteriNZ_JAJGUJ0100000731.15347.AOI_01	34.9398	48.3965
WP_002391269.1	L_reuteriNZ_JAJGUQ0100000741.15723.AOI_01	34.9398	48.3965
WP_002391269.1	L_reuteriNZ_VIQX010000121.11302.AOI_01	34.9398	48.3965
WP_002391269.1	L_reuteriNZ_JAJAOX0100003231.19623.AOI_01	34.9398	48.3965
WP_002391269.1	L_reuteriNZ_QGHS010000391.7306.AOI_01	34.9398	48.3965
WP_002391269.1	L_reuteriNZ_QGHX010000391.7677.AOI_01	34.9398	48.3965
WP_002391269.1	L_reuteriNZ_QGHY010000501.7779.AOI_01	34.9398	48.3965
WP_002391269.1	L_reuteriNZ_JAJGTO0100001231.14443.AOI_01	34.9398	48.3965
WP_002391269.1	L_reuteriNZ_CP0416761.8622.AOI_01	34.9398	48.3965
WP_002391269.1	L_reuteriNZ_JAJGWK0100001711.19071.AOI_01	34.9398	48.3965
WP_002391269.1	L_vaginalisNZ_CANCWZ0100000101.2466.AOI_01	34.7826	46.9388
WP_002391269.1	L_vaginalisNZ_JAUDDO0100000101.1600.AOI_01	34.7826	46.9388
WP_002391269.1	L_vaginalisNZ_JAUDDF0100000111.1481.AOI_01	34.7826	46.9388
WP_002391269.1	L_reuteriNZ_CP0806211.13721.AOI_01	34.6154	45.481
WP_002391269.1	L_reuteriNZ_JACJKI0100000441.13339.AOI_01	34.3373	48.3965
WP_002391269.1	L_reuteriNC_0214941.191.AOI_01	34.3373	48.3965
WP_002391269.1	L_reuteriNZ_CAKMAY0100000511.26815.AOI_01	34.3373	48.3965
WP_002391269.1	L_reuteriNZ_CP1302821.21228.AOI_01	34.3373	48.3965
WP_002391269.1	L_reuteriNZ_JAJGUT0100002261.15909.AOI_01	34.3373	48.3965
WP_002391269.1	L_reuteriNZ_LN8872911.26038.AOI_01	34.3373	48.3965
WP_002391269.1	L_reuteriNZ_LN8877201.25831.AOI_01	34.3373	48.3965
WP_002391269.1	L_reuteriNZ_MIMN010000121.3152.AOI_01	34.3373	48.3965
WP_002391269.1	L_reuteriNZ_MIMR010000441.2492.AOI_01	34.3373	48.3965
WP_002391269.1	L_reuteriNZ_JAKZMP0100000581.19842.AOI_01	34.3373	48.3965
WP_002391269.1	L_reuteriNZ_MIMJ010001121.2217.AOI_01	34.3373	48.3965
WP_002391269.1	L_reuteriNZ_MIMK010000591.2283.AOI_01	34.3373	48.3965
WP_002391269.1	L_reuteriNZ_MIMO010000501.2410.AOI_01	34.3373	48.3965
WP_002391269.1	L_reuteriNZ_MIMP010000581.3077.AOI_01	34.3373	48.3965
WP_002391269.1	L_reuteriNZ_MIMT010000621.2635.AOI_01	34.3373	48.3965
WP_002391269.1	L_reuteriNZ_CP0300891.8547.AOI_01	34.3373	48.3965
WP_002391269.1	L_reuteriNZ_JAJGUM0100001581.15503.AOI_01	34.3373	48.3965
WP_002391269.1	L_reuteriNZ_JAJGUN0100000961.15559.AOI_01	34.3373	48.3965
WP_002391269.1	L_reuteriNZ_JAJGVA0100001421.16331.AOI_01	34.3373	48.3965
WP_002391269.1	L_reuteriNZ_JAJGVB0100001581.16354.AOI_01	34.3373	48.3965
WP_002391269.1	L_reuteriNZ_JAJGVC0100001641.16479.AOI_01	34.3373	48.3965
WP_002391269.1	L_reuteriNZ_MIMW010000501.2803.AOI_01	34.3373	48.3965
WP_002391269.1	L_reuteriNZ_MIME010000591.1729.AOI_01	34.3373	48.3965
WP_002391269.1	L_reuteriNZ_MKQH010000141.1027.AOI_01	34.3373	48.3965
WP_002391269.1	L_reuteriNZ_MWVS010000801.1057.AOI_01	34.3373	48.3965
WP_002391269.1	L_reuteriNZ_JABAFN0100000151.11508.AOI_01	34.3373	48.3965
WP_002391269.1	L_reuteriNZ_JAJGTD0100001301.13773.AOI_01	34.3373	48.3965
WP_002391269.1	L_reuteriNZ_MIMF010000331.1918.AOI_01	34.3373	48.3965
WP_002391269.1	L_reuteriNZ_MIMV010000661.3283.AOI_01	34.3373	48.3965
WP_002391269.1	L_reuteriNZ_JAJGUF0100001891.15187.AOI_01	34.3373	48.3965
WP_002391269.1	L_reuteriNZ_JAJGUG0100001871.15295.AOI_01	34.3373	48.3965
WP_002391269.1	L_reuteriNZ_JAJGTV0100000661.14813.AOI_01	34.3373	48.3965
WP_002391269.1	L_reuteriNZ_JAJGTW0100000681.14836.AOI_01	34.3373	48.3965
WP_002391269.1	L_reuteriNZ_JAJGVD0100000841.16411.AOI_01	34.3373	48.3965
WP_002391269.1	L_reuteriNZ_JAJGVF0100000841.16638.AOI_01	34.3373	48.3965
WP_002391269.1	L_reuteriNZ_JAJGVG0100001351.16701.AOI_01	34.3373	48.3965
WP_002391269.1	L_reuteriNZ_JAJGVH0100000831.16709.AOI_01	34.3373	48.3965
WP_002391269.1	L_reuteriNZ_JAJGVI0100000851.16899.AOI_01	34.3373	48.3965
WP_002391269.1	L_reuteriNZ_JAJGVJ0100000691.17173.AOI_01	34.3373	48.3965
WP_002391269.1	L_reuteriNZ_AAPZ020000011.63.AOI_01	34.3373	48.3965
WP_002391269.1	L_reuteriNZ_JAJGVW0100001251.17951.AOI_01	34.3373	48.3965
WP_002391269.1	L_reuteriNZ_CP0899621.21232.AOI_01	34.3373	48.3965
WP_002391269.1	L_reuteriNZ_CP1283571.25056.AOI_01	34.3373	48.3965
WP_002391269.1	L_reuteriNZ_PESO010000101.5596.AOI_01	34.3373	48.3965
WP_002391269.1	L_reuteriNZ_QAZL010000111.6018.AOI_01	34.3373	48.3965
WP_002391269.1	L_reuteriNZ_QAZM010000101.6106.AOI_01	34.3373	48.3965
WP_002391269.1	L_reuteriNZ_CP1376111.1038.AOI_01	34.3373	48.3965
WP_002391269.1	L_reuteriNZ_QKPQ010000211.8645.AOI_01	34.3373	48.3965
WP_002391269.1	L_reuteriNZ_QKPS010000071.8952.AOI_01	34.3373	48.3965
WP_002391269.1	L_reuteriNZ_QKPW010000141.9138.AOI_01	34.3373	48.3965
WP_002391269.1	L_reuteriNZ_QKQM010000021.10281.AOI_01	34.3373	48.3965
WP_002391269.1	L_reuteriNC_0156971.6.AOI_01	33.7349	48.3965
WP_002391269.1	L_reuteriNZ_CAKMAK0100000011.26799.AOI_01	33.7349	48.3965
WP_002391269.1	L_reuteriNZ_CAKMBD0100000061.26890.AOI_01	33.7349	48.3965
WP_002391269.1	L_reuteriNZ_CP0903131.19512.AOI_01	33.7349	48.3965
WP_002391269.1	L_reuteriNZ_CP0904761.19513.AOI_01	33.7349	48.3965
WP_002391269.1	L_reuteriNZ_CP1478891.26065.AOI_01	33.7349	48.3965
WP_002391269.1	L_reuteriNZ_GG6936671.43.AOI_01	33.7349	48.3965
WP_002391269.1	L_reuteriNZ_JADNFF0100000501.13309.AOI_01	33.7349	48.3965
WP_002391269.1	L_reuteriNZ_JAHLXI0100000491.13626.AOI_01	33.7349	48.3965
WP_002391269.1	L_reuteriNZ_JAJGVL0100004241.17008.AOI_01	33.7349	48.3965
WP_002391269.1	L_reuteriNZ_JAJGVM0100002851.16859.AOI_01	33.7349	48.3965
WP_002391269.1	L_reuteriNZ_JAJGVN0100002611.17150.AOI_01	33.7349	48.3965
WP_002391269.1	L_reuteriNZ_JAJGVX0100002921.18040.AOI_01	33.7349	48.3965
WP_002391269.1	L_reuteriNZ_NBBF010000531.1603.AOI_01	33.7349	48.3965
WP_002391269.1	L_reuteriNZ_NBBH010000611.1249.AOI_01	33.7349	48.3965
WP_002391269.1	L_reuteriNZ_CANCWD0100000201.26987.AOI_01	33.7349	48.3965
WP_002391269.1	L_reuteriNZ_CP0511291.11459.AOI_02	33.7349	48.3965
WP_002391269.1	L_reuteriNZ_JAJGWB0100001331.18601.AOI_01	33.7349	48.3965
WP_002391269.1	L_reuteriNZ_JAJGWC0100002201.18397.AOI_01	33.7349	48.3965
WP_002391269.1	L_reuteriNZ_JAJGWE0100001081.18721.AOI_01	33.7349	48.3965
WP_002391269.1	L_reuteriNZ_JAJGWF0100001471.18863.AOI_01	33.7349	48.3965
WP_002391269.1	L_reuteriNZ_JAJGWG0100001791.18780.AOI_01	33.7349	48.3965
WP_002391269.1	L_reuteriNZ_JAJGWH0100002301.18936.AOI_01	33.7349	48.3965
WP_002391269.1	L_reuteriNZ_JAJGWI0100002421.19226.AOI_01	33.7349	48.3965
WP_002391269.1	L_reuteriNZ_JAJGWJ0100002101.19034.AOI_01	33.7349	48.3965
WP_002391269.1	L_reuteriNZ_JAQTKT0100000011.21148.AOI_02	33.7349	48.3965
WP_002391269.1	L_reuteriNZ_JAQTKY0100000011.21154.AOI_02	33.7349	48.3965
WP_002391269.1	L_reuteriNZ_JAQTKZ0100000011.21159.AOI_02	33.7349	48.3965
WP_002391269.1	L_reuteriNZ_QKPV010000291.9053.AOI_01	33.7349	48.3965
WP_002391269.1	L_reuteriNZ_QKPZ010000281.9246.AOI_01	33.7349	48.3965
WP_002391269.1	L_reuteriNZ_JAJGWP0100002601.19401.AOI_01	33.7349	48.3965
WP_002391269.1	L_reuteriNZ_QKQK010000091.10235.AOI_01	33.7349	48.3965
WP_002391269.1	L_reuteriNZ_JAQTLA0100000011.21156.AOI_01	33.7349	48.3965
WP_002391269.1	L_reuteriNZ_CP1283631.21225.AOI_01	33.7349	48.3965
WP_002391269.1	L_reuteriNZ_CP1369061.21335.AOI_02	33.7349	48.3965
WP_002391269.1	L_reuteriNZ_JAJGTG0100001721.14048.AOI_01	33.7349	48.3965
WP_002391269.1	L_reuteriNZ_MCNS010000041.882.AOI_01	33.7349	48.3965
WP_002391269.1	L_reuteriNZ_WJNC010000061.10803.AOI_01	33.7349	48.3965
WP_002391269.1	L_reuteriNZ_JOSW020000111.226.AOI_01	33.7349	48.3965
WP_002391269.1	L_reuteriNZ_RINQ010000681.20355.AOI_01	33.7349	48.3965
WP_002391269.1	L_reuteriNZ_JOSX010000131.200.AOI_01	33.7349	48.3965
WP_002391269.1	L_reuteriNZ_JAJGTH0100001451.14008.AOI_01	33.7349	48.3965
WP_002391269.1	L_reuteriNZ_QAZN010000061.5878.AOI_01	33.7349	48.3965
WP_002391269.1	L_reuteriNZ_NBBE010000061.1497.AOI_01	33.7349	48.3965
WP_002391269.1	L_reuteriNZ_JANKBC0100000061.20080.AOI_01	33.7349	48.3965
WP_002391269.1	L_reuteriNZ_JANKBE0100000071.19999.AOI_01	33.7349	48.3965
WP_002391269.1	L_reuteriNZ_NGPA010000101.3619.AOI_01	33.7349	48.3965
WP_002391269.1	L_reuteriNZ_NGPB010000161.3532.AOI_01	33.7349	48.3965
WP_002391269.1	L_reuteriNZ_NGPC010000091.3665.AOI_01	33.7349	48.3965
WP_002391269.1	L_reuteriNZ_NGPD010000321.3734.AOI_01	33.7349	48.3965
WP_002391269.1	L_reuteriNZ_NGPE010000901.3854.AOI_01	33.7349	48.3965
WP_002391269.1	L_reuteriNZ_NGPF010000531.3773.AOI_01	33.7349	48.3965
WP_002391269.1	L_reuteriNZ_NGPK010000021.4293.AOI_01	33.7349	48.3965
WP_002391269.1	L_reuteriNZ_NGPL010000101.4182.AOI_01	33.7349	48.3965
WP_002391269.1	L_reuteriNZ_NGPM010000141.4219.AOI_01	33.7349	48.3965
WP_002391269.1	L_reuteriNZ_NGPR010000211.4467.AOI_01	33.7349	48.3965
WP_002391269.1	L_reuteriNZ_NGPS010001321.4588.AOI_01	33.7349	48.3965
WP_002391269.1	L_reuteriNZ_NGPT010000541.4852.AOI_01	33.7349	48.3965
WP_002391269.1	L_reuteriNZ_WJMU010000191.10737.AOI_01	33.7349	48.3965
WP_002391269.1	L_reuteriNZ_WJMW010000031.11019.AOI_01	33.7349	48.3965
WP_002391269.1	L_reuteriNZ_NGPU010000751.5021.AOI_01	33.7349	48.3965
WP_002391269.1	L_reuteriNZ_NGPW010000781.4914.AOI_01	33.7349	48.3965
WP_002391269.1	L_reuteriNZ_NGPX010000081.5099.AOI_01	33.7349	48.3965
WP_002391269.1	L_reuteriNZ_NGPY010000551.4980.AOI_01	33.7349	48.3965
WP_002391269.1	L_reuteriNZ_NGPZ010000581.5180.AOI_01	33.7349	48.3965
WP_002391269.1	L_reuteriNZ_NGQA010000551.5254.AOI_01	33.7349	48.3965
WP_002391269.1	L_reuteriNZ_NGQB010000441.5184.AOI_01	33.7349	48.3965
WP_002391269.1	L_reuteriNZ_NGPG010002551.3977.AOI_01	33.7349	48.3965
WP_002391269.1	L_reuteriNZ_QKPU010000211.8764.AOI_01	33.7349	48.3965
WP_002391269.1	L_reuteriNZ_QKQE010000201.9609.AOI_01	33.7349	48.3965
WP_002391269.1	L_reuteriNZ_QKQL010000251.10349.AOI_01	33.7349	48.3965
WP_002391269.1	L_reuteriNZ_QKPY010000191.9161.AOI_01	33.7349	48.3965
WP_002391269.1	L_reuteriNZ_QKQC010000181.9718.AOI_01	33.7349	48.3965
WP_002391269.1	L_reuteriNZ_QKQH010000201.9993.AOI_01	33.7349	48.3965
WP_002391269.1	L_reuteriNZ_CP1394781.21338.AOI_01	33.7349	48.3965
WP_002391269.1	L_reuteriNZ_VRYI010002291.12830.AOI_01	33.7349	48.3965
WP_002391269.1	L_reuteriNZ_VRYJ010002231.12628.AOI_01	33.7349	48.3965
WP_002391269.1	L_reuteriNZ_VTTB010000471.12062.AOI_01	33.7349	48.3965
WP_002391269.1	L_reuteriNZ_VTTD010000461.12401.AOI_01	33.7349	48.3965
WP_002391269.1	L_reuteriNZ_VTTE010000471.12305.AOI_01	33.7349	48.3965
WP_002391269.1	L_reuteriNZ_VTTF010000471.12697.AOI_01	33.7349	48.3965
WP_002391269.1	L_reuteriNZ_VRYK010000941.11591.AOI_01	33.7349	48.3965
WP_002391269.1	L_reuteriNZ_VRYL010000791.12050.AOI_01	33.7349	48.3965
WP_002391269.1	L_reuteriNZ_VTTC010000091.12497.AOI_01	33.7349	48.3965
WP_002391269.1	L_reuteriNZ_CANCWL0100000171.27039.AOI_01	33.7349	48.3965
WP_002391269.1	L_reuteriNZ_CP0474161.12953.AOI_02	33.7349	48.3965
WP_002391269.1	L_reuteriNZ_JAJGVZ0100003221.18195.AOI_01	33.7349	48.3965
WP_002391269.1	L_reuteriNZ_PZQN010000051.5767.AOI_01	33.7349	48.3965
WP_002391269.1	L_reuteriNZ_PZQO010000071.5816.AOI_01	33.7349	48.3965
WP_002391269.1	L_reuteriNZ_QKPR010000141.8826.AOI_01	33.7349	48.3965
WP_002391269.1	L_reuteriNZ_QKPX010000211.9354.AOI_01	33.7349	48.3965
WP_002391269.1	L_reuteriNZ_QKQJ010000151.10060.AOI_01	33.7349	48.3965
WP_002391269.1	L_reuteriNZ_QKPT010000291.8893.AOI_01	33.7349	48.3965
WP_002391269.1	L_reuteriNZ_JAQTKU0100000011.21151.AOI_01	33.7349	48.3965
WP_002391269.1	L_reuteriNZ_QKQA010000421.9480.AOI_01	33.7349	48.3965
WP_002391269.1	L_reuteriNZ_QKQB010000131.9531.AOI_01	33.7349	48.3965
WP_002391269.1	L_reuteriNZ_QKQD010000241.9798.AOI_01	33.7349	48.3965
WP_002391269.1	L_reuteriNZ_JAJGTS0100000971.14880.AOI_01	33.7349	48.3965
WP_002391269.1	L_reuteriNZ_JAJGTT0100000851.14740.AOI_01	33.7349	48.3965
WP_002391269.1	L_reuteriNZ_JAJGTU0100000881.14758.AOI_01	33.7349	48.3965
WP_002391269.1	L_reuteriNZ_SDQX010000131.11337.AOI_01	33.7349	48.3965
WP_002391269.1	L_reuteriNZ_JAJGWL0100001111.19115.AOI_01	33.7349	48.3965
WP_002391269.1	L_reuteriNZ_CP0154082.379.AOI_01	33.7349	48.3965
WP_002391269.1	L_reuteriNZ_CP0653181.13326.AOI_01	33.7349	48.3965
WP_002391269.1	L_reuteriNZ_NHMT010000011.3517.AOI_01	33.7349	48.3965
WP_002391269.1	L_reuteriNZ_CP0845831.13724.AOI_01	33.7349	48.3965
WP_002391269.1	L_reuteriNZ_CP0845841.13723.AOI_01	33.7349	48.3965
WP_002391269.1	L_reuteriNC_0218721.195.AOI_01	33.1325	48.3965
WP_002391269.1	L_reuteriNZ_JAJGTP0100001761.14551.AOI_01	33.1325	48.3965
WP_002391269.1	L_reuteriNZ_JAJGTQ0100001681.14598.AOI_01	33.1325	48.3965
WP_002391269.1	L_reuteriNZ_JAYFHP0100001071.24043.AOI_01	33.1325	48.3965
WP_002391269.1	L_reuteriNZ_JAYFIA0100000971.22587.AOI_01	33.1325	48.3965
WP_002391269.1	L_vaginalisNZ_CP1172951.1447.AOI_01	32.0988	47.2303
WP_002391269.1	L_vaginalisNZ_JALFIJ0100000511.673.AOI_01	32.0988	47.2303
WP_002391269.1	L_vaginalisNZ_JAKHMK0100000061.1368.AOI_01	32.0312	74.6356
WP_002391269.1	L_vaginalisNZ_JAKHML0100000061.1293.AOI_01	32.0312	74.6356
WP_002391269.1	L_vaginalisNZ_JAKHMM0100000071.1269.AOI_01	32.0312	74.6356
WP_002391269.1	L_vaginalisNZ_JAKHMN0100000061.1382.AOI_01	32.0312	74.6356
WP_002391269.1	L_vaginalisNZ_JAKHMO0100000071.1206.AOI_01	32.0312	74.6356
WP_002391269.1	L_vaginalisNZ_JAKHMS0100000071.1199.AOI_01	32.0312	74.6356
WP_002391269.1	L_vaginalisNZ_JAKHNC0100000061.1113.AOI_01	32.0312	74.6356
WP_002391269.1	L_vaginalisNZ_JAKHNI0100000061.1019.AOI_01	32.0312	74.6356
WP_002391269.1	L_vaginalisNZ_JAKHNJ0100000061.1069.AOI_01	32.0312	74.6356
WP_002391269.1	L_vaginalisNZ_JAKHNK0100000061.998.AOI_01	32.0312	74.6356
WP_002391269.1	L_vaginalisNZ_JAKHNL0100000071.970.AOI_01	32.0312	74.6356
WP_002391269.1	L_vaginalisNZ_JAKHNM0100000061.867.AOI_01	32.0312	74.6356
WP_002391269.1	L_vaginalisNZ_JAKHNN0100000061.826.AOI_01	32.0312	74.6356
WP_002391269.1	L_vaginalisNZ_JAKHNO0100000061.888.AOI_01	32.0312	74.6356
WP_002391269.1	L_vaginalisNZ_JALBTH0100000081.556.AOI_01	32.0312	74.6356
WP_002391269.1	L_vaginalisNZ_AZGL010000191.49.AOI_01	31.4815	47.2303
WP_002391269.1	L_vaginalisNZ_CP0452401.170.AOI_02	31.4815	47.2303
WP_002391269.1	L_vaginalisNZ_GG6934121.1.AOI_01	31.4815	47.2303
WP_002391269.1	L_vaginalisNZ_CP1043991.726.AOI_01	31.4815	47.2303
WP_002391269.1	L_vaginalisNZ_JAKNNW0100000061.733.AOI_01	31.4815	47.2303
WP_002391269.1	L_vaginalisNZ_JAUDDU0100000201.1662.AOI_01	31.4815	47.2303
WP_002391269.1	L_vaginalisNZ_CANCXG0100000231.2562.AOI_01	31.4815	47.2303
WP_002391269.1	L_vaginalisNZ_JAUDDS0100000181.1717.AOI_01	31.4815	47.2303
WP_002391269.1	L_vaginalisNZ_CP1068841.727.AOI_01	31.4815	47.2303
WP_002391269.1	L_vaginalisNZ_JAQDAC0100000111.1420.AOI_01	31.4815	47.2303
WP_002391269.1	L_reuteriNZ_CALNWZ0100000141.26958.AOI_01	31.4286	71.4286
WP_002391269.1	L_reuteriNZ_RINS010000571.20512.AOI_01	31.4286	71.4286
WP_002391269.1	L_reuteriNZ_VRYK010000671.11621.AOI_01	31.0204	71.4286
WP_002391269.1	L_reuteriNZ_VRYL010000011.12005.AOI_01	31.0204	71.4286
WP_002391269.1	L_reuteriNZ_VTTC010000101.12523.AOI_01	31.0204	71.4286
WP_002391269.1	L_vaginalisNZ_CAJPNE0100000031.2340.AOI_01	30.8642	47.2303
WP_002391269.1	L_reuteriNZ_QKQB010000021.9519.AOI_01	30.7971	80.4665
WP_002391269.1	L_reuteriNZ_JAJAOX0100001901.19722.AOI_01	30.6122	71.4286
WP_002391269.1	L_reuteriNZ_QGHS010000271.7356.AOI_01	30.6122	71.4286
WP_002391269.1	L_reuteriNZ_QGHX010000261.7662.AOI_01	30.6122	71.4286
WP_002391269.1	L_reuteriNZ_QGHY010000261.7836.AOI_01	30.6122	71.4286
WP_002391269.1	L_reuteriNZ_JAJGWH0100002031.18965.AOI_01	30.5455	80.1749
WP_002391269.1	L_reuteriNZ_JAJGWI0100002201.19264.AOI_01	30.5455	80.1749
WP_002391269.1	L_reuteriNZ_JAJGWJ0100002231.19048.AOI_01	30.5455	80.1749
WP_002391269.1	L_reuteriNZ_JAJGWP0100002621.19395.AOI_01	30.4348	80.4665
WP_002391269.1	L_reuteriNZ_RINQ010000111.20371.AOI_01	30.0366	79.5918
WP_002391269.1	L_reuteriNZ_JAQOWD0100000661.20963.AOI_01	29.9625	77.8426
WP_002391269.1	L_reuteriNZ_JAJGWP0100002631.19399.AOI_01	29.927	79.8834
WP_002391269.1	L_reuteriNZ_JAJGUO0100001521.15656.AOI_01	29.8182	80.1749
WP_002391269.1	L_reuteriNZ_RINO010002241.20146.AOI_01	29.8182	80.1749
WP_002391269.1	L_reuteriNZ_RINP010000971.20239.AOI_01	29.8182	80.1749
WP_002391269.1	L_reuteriNZ_JAJGTC0100000461.13754.AOI_01	29.6703	79.5918
WP_002391269.1	L_reuteriNZ_JAJGUU0100001031.16109.AOI_01	29.6703	79.5918
WP_002391269.1	L_reuteriNZ_JAJGUU0100001071.16084.AOI_01	29.6703	79.5918
WP_002391269.1	L_reuteriNZ_JAJGUU0100001231.16102.AOI_01	29.6703	79.5918
WP_002391269.1	L_reuteriNZ_JAJGUV0100000741.16063.AOI_01	29.6703	79.5918
WP_002391269.1	L_reuteriNZ_JAJGWH0100002021.18942.AOI_01	29.6703	79.5918
WP_002391269.1	L_reuteriNZ_JAJGWI0100002191.19284.AOI_01	29.6703	79.5918
WP_002391269.1	L_reuteriNZ_JAJGWJ0100002221.18989.AOI_01	29.6703	79.5918
WP_002391269.1	L_reuteriNZ_JAJGTI0100000031.14277.AOI_01	29.3436	75.5102
WP_002391269.1	L_reuteriNZ_JAJGTJ0100001071.14352.AOI_01	29.3436	75.5102
WP_002391269.1	L_reuteriNZ_JAJGTK0100000041.14195.AOI_01	29.3436	75.5102
WP_002391269.1	L_reuteriNZ_WJNA010000051.10959.AOI_01	29.3436	75.5102
WP_002391269.1	L_reuteriNZ_JAJGVY0100003361.18147.AOI_01	29.3436	75.5102
WP_002391269.1	L_reuteriNZ_JAJGTR0100001391.14674.AOI_01	29.3436	75.5102
WP_002391269.1	L_reuteriNC_0095131.1.AOI_01	29.2308	75.8017
WP_002391269.1	L_reuteriNC_0106091.0.AOI_01	29.2308	75.8017
WP_002391269.1	L_reuteriNZ_ACGX020000061.12.AOI_01	29.2308	75.8017
WP_002391269.1	L_reuteriNZ_AZDD010000301.311.AOI_01	29.2308	75.8017
WP_002391269.1	L_reuteriNZ_CP0110241.274.AOI_01	29.2308	75.8017
WP_002391269.1	L_reuteriNZ_CP0357901.8233.AOI_01	29.2308	75.8017
WP_002391269.1	L_reuteriNZ_CP0456051.13197.AOI_01	29.2308	75.8017
WP_002391269.1	L_reuteriNZ_CP0889311.19508.AOI_01	29.2308	75.8017
WP_002391269.1	L_reuteriNZ_CP0893031.19509.AOI_01	29.2308	75.8017
WP_002391269.1	L_reuteriNZ_CP0957351.19889.AOI_01	29.2308	75.8017
WP_002391269.1	L_reuteriNZ_CP1424191.25058.AOI_01	29.2308	75.8017
WP_002391269.1	L_reuteriNZ_CP1479111.26123.AOI_01	29.2308	75.8017
WP_002391269.1	L_reuteriNZ_CP1626121.26203.AOI_01	29.2308	75.8017
WP_002391269.1	L_reuteriNZ_CP1626451.26204.AOI_01	29.2308	75.8017
WP_002391269.1	L_reuteriNZ_CP1626721.26205.AOI_01	29.2308	75.8017
WP_002391269.1	L_reuteriNZ_GG6937631.52.AOI_01	29.2308	75.8017
WP_002391269.1	L_reuteriNZ_JAJGVK0100001631.17218.AOI_01	29.2308	75.8017
WP_002391269.1	L_reuteriNZ_JAQOWH0100000511.21068.AOI_01	29.2308	75.8017
WP_002391269.1	L_reuteriNZ_JAQOWI0100000661.21143.AOI_01	29.2308	75.8017
WP_002391269.1	L_reuteriNZ_JARJDI0100000011.21226.AOI_01	29.2308	75.8017
WP_002391269.1	L_reuteriNZ_JBBMOQ0100000281.26112.AOI_01	29.2308	75.8017
WP_002391269.1	L_reuteriNZ_LYWI010000421.354.AOI_01	29.2308	75.8017
WP_002391269.1	L_reuteriNZ_MAGB010001761.936.AOI_01	29.2308	75.8017
WP_002391269.1	L_reuteriNZ_QAHC010000281.5922.AOI_01	29.2308	75.8017
WP_002391269.1	L_reuteriNZ_QAHD010000271.5954.AOI_01	29.2308	75.8017
WP_002391269.1	L_reuteriNZ_RINR010000111.20453.AOI_01	29.2308	75.8017
WP_002391269.1	L_reuteriNZ_QGIB010000201.6627.AOI_01	29.2308	75.8017
WP_002391269.1	L_reuteriNZ_MIMU010000841.2765.AOI_01	29.2308	75.8017
WP_002391269.1	L_reuteriNZ_NGPB010000231.3531.AOI_01	29.1045	78.1341
WP_002391269.1	L_reuteriNZ_NGPC010000291.3679.AOI_01	29.1045	78.1341
WP_002391269.1	L_reuteriNZ_NGPF010000651.3762.AOI_01	29.1045	78.1341
WP_002391269.1	L_reuteriNZ_NGPG010000991.3979.AOI_01	29.1045	78.1341
WP_002391269.1	L_reuteriNZ_NGPK010000081.4312.AOI_01	29.1045	78.1341
WP_002391269.1	L_reuteriNZ_NGPM010000281.4240.AOI_01	29.1045	78.1341
WP_002391269.1	L_reuteriNZ_NGPR010000661.4497.AOI_01	29.1045	78.1341
WP_002391269.1	L_reuteriNZ_NGPS010000731.4629.AOI_01	29.1045	78.1341
WP_002391269.1	L_reuteriNZ_NGPT010000641.4818.AOI_01	29.1045	78.1341
WP_002391269.1	L_reuteriNZ_JAYFIC0100000451.22204.AOI_01	29.0909	80.1749
WP_002391269.1	L_reuteriNZ_JAYFID0100000401.21995.AOI_01	29.0909	80.1749
WP_002391269.1	L_reuteriNZ_JAYFIE0100000471.21876.AOI_01	29.0909	80.1749
WP_002391269.1	L_reuteriNZ_NBBD010000191.1397.AOI_01	28.7129	88.3382
WP_002391269.1	L_reuteriNZ_JAYFIA0100000091.22599.AOI_01	28.4672	79.8834
WP_002391269.1	L_reuteriNZ_CAKMBD0100000341.26894.AOI_01	28.3828	88.3382
WP_002391269.1	L_reuteriNZ_GG6936691.14.AOI_01	28.3828	88.3382
WP_002391269.1	L_reuteriNZ_JAJGVL0100004451.16982.AOI_01	28.3828	88.3382
WP_002391269.1	L_reuteriNZ_JAJGVM0100002961.16829.AOI_01	28.3828	88.3382
WP_002391269.1	L_reuteriNZ_JAJGVN0100001161.17051.AOI_01	28.3828	88.3382
WP_002391269.1	L_reuteriNZ_JAJGVX0100002901.18009.AOI_01	28.3828	88.3382
WP_002391269.1	L_reuteriNZ_NBBF010000111.1655.AOI_01	28.3828	88.3382
WP_002391269.1	L_reuteriNZ_PESO010000111.5574.AOI_01	28.3828	88.3382
WP_002391269.1	L_reuteriNZ_QAZL010000101.6054.AOI_01	28.3828	88.3382
WP_002391269.1	L_reuteriNZ_QAZM010000091.6059.AOI_01	28.3828	88.3382
WP_002391269.1	L_reuteriNZ_SATM010000021.8329.AOI_01	28.3636	80.1749
WP_002391269.1	L_reuteriNZ_QAZN010000051.5851.AOI_01	28.3582	78.1341
WP_002391269.1	L_reuteriNZ_JAJGUR0100001291.15841.AOI_01	28.3582	78.1341
WP_002391269.1	L_reuteriNZ_JAJGUR0100001321.15847.AOI_01	28.3582	78.1341
WP_002391269.1	L_reuteriNZ_JAJGVE0100001681.16556.AOI_01	28.3582	78.1341
WP_002391269.1	L_reuteriNZ_NGPL010000151.4159.AOI_01	28.3582	78.1341
WP_002391269.1	L_reuteriNZ_CP0511291.11459.AOI_01	28.3582	78.1341
WP_002391269.1	L_reuteriNZ_CANCWD0100000041.27007.AOI_01	28.0528	88.3382
WP_002391269.1	L_vaginalisNZ_AZGL010000031.61.AOI_01	28	72.8863
WP_002391269.1	L_vaginalisNZ_CP0452401.170.AOI_01	28	72.8863
WP_002391269.1	L_vaginalisNZ_GG6934141.6.AOI_01	28	72.8863
WP_002391269.1	L_vaginalisNZ_JBHROG0100000901.1852.AOI_01	28	72.8863
WP_002391269.1	L_reuteriNZ_CANCWD0100000051.27038.AOI_01	27.9851	78.1341
WP_002391269.1	L_reuteriNZ_CP1044381.20865.AOI_01	27.9851	78.1341
WP_002391269.1	L_reuteriNZ_JAYFIA0100000361.22555.AOI_01	27.9851	78.1341
WP_002391269.1	L_reuteriNZ_JAJGVU0100001081.18367.AOI_01	27.9851	78.1341
WP_002391269.1	L_reuteriNZ_JAJGVV0100001401.17846.AOI_01	27.9851	78.1341
WP_002391269.1	L_reuteriNZ_CP0806221.13722.AOI_01	27.9851	78.1341
WP_002391269.1	L_reuteriNZ_QKQA010000111.9452.AOI_01	27.9851	78.1341
WP_002391269.1	L_reuteriNZ_JAXOJV0100000331.21354.AOI_01	27.9851	78.1341
WP_002391269.1	L_reuteriNZ_RJWE010000021.8127.AOI_01	27.9851	78.1341
WP_002391269.1	L_reuteriNZ_NBBG010000111.1173.AOI_01	27.9851	78.1341
WP_002391269.1	L_reuteriNZ_JANKBD0100000011.20031.AOI_01	27.7778	89.2128
WP_002391269.1	L_reuteriNZ_JAJGTG0100001821.14083.AOI_01	27.7778	89.2128
WP_002391269.1	L_reuteriNZ_JAJGTH0100001771.13998.AOI_01	27.7778	89.2128
WP_002391269.1	L_reuteriNZ_JAYFHX0100000011.23074.AOI_01	27.6119	78.1341
WP_002391269.1	L_reuteriNZ_JAYFIC0100000371.22258.AOI_01	27.6119	78.1341
WP_002391269.1	L_reuteriNZ_JAYFID0100000271.22081.AOI_01	27.6119	78.1341
WP_002391269.1	L_reuteriNZ_JAYFIE0100000391.21923.AOI_01	27.6119	78.1341
WP_002391269.1	L_reuteriNZ_NGPU010000761.5070.AOI_01	27.6119	78.1341
WP_002391269.1	L_reuteriNZ_NGPW010000641.4943.AOI_01	27.6119	78.1341
WP_002391269.1	L_reuteriNZ_NGPX010000221.5074.AOI_01	27.6119	78.1341
WP_002391269.1	L_reuteriNZ_NGPY010000181.4976.AOI_01	27.6119	78.1341
WP_002391269.1	L_reuteriNZ_NGPZ010000351.5133.AOI_01	27.6119	78.1341
WP_002391269.1	L_reuteriNZ_NGQA010000201.5257.AOI_01	27.6119	78.1341
WP_002391269.1	L_reuteriNZ_NGQB010000191.5230.AOI_01	27.6119	78.1341
WP_002391269.1	L_reuteriNZ_CAKMAY0100000141.26879.AOI_01	27.451	89.2128
WP_002391269.1	L_reuteriNZ_QKQN010000381.10525.AOI_01	27.451	89.2128
WP_002391269.1	L_reuteriNZ_QKQO010000371.10571.AOI_01	27.451	89.2128
WP_002391269.1	L_reuteriNZ_CP1024251.20100.AOI_01	27.451	89.2128
WP_002391269.1	L_reuteriNZ_JAHWWB0100000051.13705.AOI_01	27.451	89.2128
WP_002391269.1	L_reuteriNZ_JAJGTP0100001801.14539.AOI_01	27.451	89.2128
WP_002391269.1	L_reuteriNZ_JAJGTQ0100001601.14641.AOI_01	27.451	89.2128
WP_002391269.1	L_reuteriNZ_JAJGVD0100000691.16408.AOI_01	27.451	89.2128
WP_002391269.1	L_reuteriNZ_JAJGVF0100000711.16660.AOI_01	27.451	89.2128
WP_002391269.1	L_reuteriNZ_JAJGVG0100001271.16672.AOI_01	27.451	89.2128
WP_002391269.1	L_reuteriNZ_JAJGVH0100000751.16716.AOI_01	27.451	89.2128
WP_002391269.1	L_reuteriNZ_JAJGVI0100000721.16887.AOI_01	27.451	89.2128
WP_002391269.1	L_reuteriNZ_JAJGVJ0100000511.17184.AOI_01	27.451	89.2128
WP_002391269.1	L_reuteriNZ_WJND010000041.11067.AOI_01	27.451	89.2128
WP_002391269.1	L_reuteriNZ_JAJGUR0100001231.15846.AOI_01	27.451	89.2128
WP_002391269.1	L_reuteriNZ_QKPR010000111.8844.AOI_01	27.451	89.2128
WP_002391269.1	L_reuteriNZ_QKPX010000121.9378.AOI_01	27.451	89.2128
WP_002391269.1	L_reuteriNZ_WJNA010000231.10942.AOI_01	27.451	89.2128
WP_002391269.1	L_reuteriNZ_JAJGTB0100001191.13843.AOI_01	27.451	89.2128
WP_002391269.1	L_reuteriNZ_JAJGUM0100001451.15522.AOI_01	27.451	89.2128
WP_002391269.1	L_reuteriNZ_JAJGUN0100000831.15587.AOI_01	27.451	89.2128
WP_002391269.1	L_reuteriNZ_JAJGVA0100000801.16322.AOI_01	27.451	89.2128
WP_002391269.1	L_reuteriNZ_JAJGVB0100001371.16349.AOI_01	27.451	89.2128
WP_002391269.1	L_reuteriNZ_JAJGVC0100000221.16498.AOI_01	27.451	89.2128
WP_002391269.1	L_reuteriNZ_JBCLUD0100000021.26226.AOI_01	27.451	89.2128
WP_002391269.1	L_reuteriNZ_QKPV010000031.9023.AOI_01	27.451	89.2128
WP_002391269.1	L_reuteriNZ_QKPZ010000031.9242.AOI_01	27.451	89.2128
WP_002391269.1	L_reuteriNZ_JASOXU0100000011.21184.AOI_01	27.451	89.2128
WP_002391269.1	L_reuteriNZ_JAJGUS0100001111.16002.AOI_01	27.1242	89.2128
WP_002391269.1	L_reuteriNZ_QKQL010000081.10426.AOI_01	27.1242	89.2128
WP_002391269.1	L_reuteriNZ_JABAFN0100000011.11465.AOI_01	27.1242	89.2128
WP_002391269.1	L_reuteriNZ_CP0474161.12953.AOI_01	27.1242	89.2128
WP_002391269.1	L_reuteriNZ_JAJGWA0100000771.18480.AOI_01	27.1242	89.2128
WP_002391269.1	L_reuteriNZ_JAJGWB0100001341.18544.AOI_01	27.1242	89.2128
WP_002391269.1	L_reuteriNZ_JAJGWC0100001381.18430.AOI_01	27.1242	89.2128
WP_002391269.1	L_reuteriNZ_JAJGWE0100001451.18736.AOI_01	27.1242	89.2128
WP_002391269.1	L_reuteriNZ_JAJGWF0100001521.18905.AOI_01	27.1242	89.2128
WP_002391269.1	L_reuteriNZ_JAJGWG0100002201.18841.AOI_01	27.1242	89.2128
WP_002391269.1	L_reuteriNZ_JAJGWP0100002541.19412.AOI_01	27.1242	89.2128
WP_002391269.1	L_reuteriNZ_QKQK010000131.10204.AOI_01	27.1242	89.2128
WP_002391269.1	L_reuteriNZ_QKPT010000031.8941.AOI_01	27.1242	89.2128
WP_002391269.1	L_reuteriNZ_JAQTKT0100000011.21148.AOI_01	27.1242	89.2128
WP_002391269.1	L_reuteriNZ_JAQTKY0100000011.21154.AOI_01	27.1242	89.2128
WP_002391269.1	L_reuteriNZ_JAQTKZ0100000011.21159.AOI_01	27.1242	89.2128
WP_002391269.1	L_reuteriNZ_NGPB010000191.3566.AOI_01	27.1242	89.2128
WP_002391269.1	L_reuteriNZ_NGPC010000241.3649.AOI_01	27.1242	89.2128
WP_002391269.1	L_reuteriNZ_NGPE010000711.3827.AOI_01	27.1242	89.2128
WP_002391269.1	L_reuteriNZ_NGPF010000601.3788.AOI_01	27.1242	89.2128
WP_002391269.1	L_reuteriNZ_NGPK010000131.4303.AOI_01	27.1242	89.2128
WP_002391269.1	L_reuteriNZ_NGPM010000221.4254.AOI_01	27.1242	89.2128
WP_002391269.1	L_reuteriNZ_QKQF010000011.9833.AOI_01	27.1242	89.2128
WP_002391269.1	L_reuteriNZ_CP0592751.12954.AOI_02	27.1242	89.2128
WP_002391269.1	L_reuteriNZ_MIMW010000331.2813.AOI_01	27.1242	89.2128
WP_002391269.1	L_reuteriNZ_JAJGTA0100002241.14158.AOI_01	27.1242	89.2128
WP_002391269.1	L_reuteriNZ_JAJGWD0100003201.18672.AOI_01	27.1242	89.2128
WP_002391269.1	L_reuteriNZ_JAJGVU0100002201.18357.AOI_01	26.9784	81.0496
WP_002391269.1	L_reuteriNZ_JAJGVV0100001671.17787.AOI_01	26.9784	81.0496
WP_002391269.1	L_reuteriNZ_JAJGVW0100001311.17903.AOI_01	26.9784	81.0496
WP_002391269.1	L_reuteriNZ_CP0450491.8623.AOI_01	26.8657	78.1341
WP_002391269.1	L_reuteriNZ_CP0658491.19502.AOI_02	26.7974	89.2128
WP_002391269.1	L_reuteriNZ_NGPG010002091.3965.AOI_01	26.7974	89.2128
WP_002391269.1	L_reuteriNZ_JAJGTI0100000701.14298.AOI_01	26.7797	86.0058
WP_002391269.1	L_reuteriNZ_JAJGTJ0100000801.14364.AOI_01	26.7797	86.0058
WP_002391269.1	L_reuteriNZ_JAJGTK0100001081.14203.AOI_01	26.7797	86.0058
WP_002391269.1	L_vaginalisNZ_CALVCD0100000081.2438.AOI_01	26.6423	79.8834
WP_002391269.1	L_vaginalisNZ_JAUDDO0100000201.1586.AOI_01	26.6423	79.8834
WP_002391269.1	L_vaginalisNZ_CANCWZ0100000011.2499.AOI_01	26.6423	79.8834
WP_002391269.1	L_reuteriNZ_LN8876781.5625.AOI_01	26.6187	81.0496
WP_002391269.1	L_reuteriNZ_CANCWL0100000071.27072.AOI_01	26.4706	89.2128
WP_002391269.1	L_reuteriNZ_QKQI010000121.10147.AOI_01	26.378	74.0525
WP_002391269.1	L_vaginalisNZ_JAUDDF0100000241.1461.AOI_01	26.2774	79.8834
WP_002391269.1	L_reuteriNZ_JAJAOX0100001791.19674.AOI_01	26.1438	89.2128
WP_002391269.1	L_reuteriNZ_QGHS010000261.7256.AOI_01	26.1438	89.2128
WP_002391269.1	L_reuteriNZ_QGHX010000171.7538.AOI_01	26.1438	89.2128
WP_002391269.1	L_reuteriNZ_QGHY010000171.7781.AOI_01	26.1438	89.2128
WP_002391269.1	L_reuteriNZ_SATM010000381.8344.AOI_01	26.1438	89.2128
WP_002391269.1	L_reuteriNZ_QGHP010000141.6188.AOI_01	26.1438	89.2128
WP_002391269.1	L_reuteriNZ_QGHQ010000131.6582.AOI_01	26.1438	89.2128
WP_002391269.1	L_reuteriNZ_QGHT010000171.7529.AOI_01	26.1438	89.2128
WP_002391269.1	L_reuteriNZ_QGHU010000131.6243.AOI_01	26.1438	89.2128
WP_002391269.1	L_reuteriNZ_QGIB010000131.6653.AOI_01	26.1438	89.2128
WP_002391269.1	L_reuteriNZ_QKQD010000031.9821.AOI_01	25.817	89.2128
WP_002391269.1	L_reuteriNZ_QGHT010000191.7512.AOI_01	25.6039	60.3499
WP_002391269.1	L_vaginalisNZ_CAUPFI0100000021.2662.AOI_01	24.6324	79.3003
WP_002391269.1	L_vaginalisNZ_JAKHMK0100000031.1339.AOI_01	24.2647	79.3003
WP_002391269.1	L_vaginalisNZ_JAKHML0100000031.1323.AOI_01	24.2647	79.3003
WP_002391269.1	L_vaginalisNZ_JAKHMM0100000231.1255.AOI_01	24.2647	79.3003
WP_002391269.1	L_vaginalisNZ_JAKHMN0100000031.1416.AOI_01	24.2647	79.3003
WP_002391269.1	L_vaginalisNZ_JAKHMO0100000231.1238.AOI_01	24.2647	79.3003
WP_002391269.1	L_vaginalisNZ_JAKHMS0100000031.1194.AOI_01	24.2647	79.3003
WP_002391269.1	L_vaginalisNZ_JAKHNC0100000241.1120.AOI_01	24.2647	79.3003
WP_002391269.1	L_vaginalisNZ_JAKHNI0100000241.1025.AOI_01	24.2647	79.3003
WP_002391269.1	L_vaginalisNZ_JAKHNJ0100000261.1098.AOI_01	24.2647	79.3003
WP_002391269.1	L_vaginalisNZ_JAKHNK0100000031.992.AOI_01	24.2647	79.3003
WP_002391269.1	L_vaginalisNZ_JAKHNL0100000221.953.AOI_01	24.2647	79.3003
WP_002391269.1	L_vaginalisNZ_JAKHNM0100000031.861.AOI_01	24.2647	79.3003
WP_002391269.1	L_vaginalisNZ_JAKHNN0100000031.811.AOI_01	24.2647	79.3003
WP_002391269.1	L_vaginalisNZ_JAKHNO0100000031.919.AOI_01	24.2647	79.3003
WP_002391269.1	L_vaginalisNZ_JALBTH0100000281.640.AOI_01	24.2647	79.3003
WP_002391269.1	L_reuteriNZ_WJNE010000051.10655.AOI_01	22.5694	83.965
WP_002391269.1	L_reuteriNZ_MIMI010000571.1811.AOI_01	21.9512	83.6735
WP_002391269.1	L_reuteriNZ_WJNC010000181.10789.AOI_01	21.875	83.965
WP_002391269.1	L_reuteriNZ_JAJGUT0100001711.15942.AOI_01	21.875	83.965
WP_002391269.1	L_reuteriNZ_CP0592751.12954.AOI_01	21.6028	83.6735
WP_002391269.1	L_reuteriNZ_JAJGWH0100001971.18940.AOI_01	21.6028	83.6735
WP_002391269.1	L_reuteriNZ_JAJGWI0100002141.19220.AOI_01	21.6028	83.6735
WP_002391269.1	L_reuteriNZ_JAJGWJ0100002041.19024.AOI_01	21.6028	83.6735
WP_002391269.1	L_reuteriNZ_JAJGVU0100002191.18386.AOI_01	21.6028	83.6735
WP_002391269.1	L_reuteriNZ_JAJGVV0100001681.17771.AOI_01	21.6028	83.6735
WP_002391269.1	L_reuteriNZ_CP0658491.19502.AOI_01	21.6028	83.6735
WP_002391269.1	L_reuteriNZ_JAJGVW0100001131.17899.AOI_01	21.6028	83.6735
WP_002391269.1	L_reuteriNZ_JAJGTP0100001941.14573.AOI_01	21.5278	83.965
WP_002391269.1	L_reuteriNZ_JAJGTQ0100001571.14644.AOI_01	21.5278	83.965
WP_002391269.1	L_reuteriNZ_JAJGWK0100001831.19076.AOI_01	21.5278	83.965
WP_002391269.1	L_reuteriNZ_NGPL010000841.4202.AOI_01	21.5278	83.965
WP_002391269.1	L_reuteriNZ_NGPR010001091.4445.AOI_01	21.5278	83.965
WP_002391269.1	L_reuteriNZ_NGPS010000991.4624.AOI_01	21.5278	83.965
WP_002391269.1	L_reuteriNZ_NGPT010000671.4876.AOI_01	21.5278	83.965
WP_002391269.1	L_reuteriNZ_QKPT010000241.8925.AOI_01	21.2544	83.6735
WP_002391269.1	L_reuteriNZ_JAJGUM0100001251.15532.AOI_01	21.2544	83.6735
WP_002391269.1	L_reuteriNZ_JAJGUN0100000761.15615.AOI_01	21.2544	83.6735
WP_002391269.1	L_reuteriNZ_JAJGVA0100001481.16319.AOI_01	21.2544	83.6735
WP_002391269.1	L_reuteriNZ_JAJGVB0100001531.16395.AOI_01	21.2544	83.6735
WP_002391269.1	L_reuteriNZ_JAJGVC0100001471.16494.AOI_01	21.2544	83.6735
WP_002391269.1	L_reuteriNZ_JAPWIY0100000311.20945.AOI_01	21.2544	83.6735
WP_002391269.1	L_reuteriNZ_JAHWWB0100000161.13714.AOI_01	21.2544	83.6735
WP_002391269.1	L_reuteriNZ_JAYWKY0100000021.26060.AOI_01	21.2544	83.6735
WP_002391269.1	L_reuteriNZ_NBBD010000181.1429.AOI_01	21.2544	83.6735
WP_002391269.1	L_reuteriNZ_QOWD010000051.13049.AOI_01	21.2544	83.6735
WP_002391269.1	L_reuteriNZ_QGHR010000221.6798.AOI_01	21.2544	83.6735
WP_002391269.1	L_reuteriNZ_QGHZ010000181.6849.AOI_01	21.2544	83.6735
WP_002391269.1	L_reuteriNZ_QGIA010000211.6961.AOI_01	21.2544	83.6735
WP_002391269.1	L_reuteriNZ_QGIC010000221.7025.AOI_01	21.2544	83.6735
WP_002391269.1	L_reuteriNZ_QGID010000201.7925.AOI_01	21.2544	83.6735
