# Supplementary material for: Genome-Resolved In Silico Analysis of Poultry and Swine Lactobacillales Provides a Data- Driven Framework for Elucidating Metabolic Synergies in Multi-Strain Probiotics
Source: Research Square preprint supplement (doi:10.21203/rs.3.rs-7234892/v1), 2025-08-12
Supplement: Supplementary file 9 [file dde93a4a1288219abec733ac.xlsx]

## Sheet: TS6
Identifier	ORF start	ORF end	Strand	Bacteriocin	Class	Identify
NZ_BNJY010000111.456.AOI.blast.table:NZ_BNJY010000111.456.AOI_10	10868	0	-	154.2;Mundticin	bacteriocinII	43.9
NZ_BNJY010000111.456.AOI.blast.table:NZ_BNJY010000111.456.AOI_11	10928	0	-	155.2;Mundticin_ATO6	bacteriocinII	48.9
NZ_BNJY010000111.456.AOI.blast.table:NZ_BNJY010000111.456.AOI_12	10871	0	-	156.2;Mundticin_KS	bacteriocinII	46.2
NZ_CP0637661.5200.AOI.blast.table:NZ_CP0637661.5200.AOI_6	2357113	2336936	-	155.2;Mundticin_ATO6	bacteriocinII	48.9
NZ_CP0637661.5200.AOI.blast.table:NZ_CP0637661.5200.AOI_7	2357056	2336936	-	156.2;Mundticin_KS	bacteriocinII	46.2
NZ_CP0842461.4165.AOI.blast.table:NZ_CP0842461.4165.AOI_7	44511	24454	-	154.2;Mundticin	bacteriocinII	40.0
NZ_CP0842461.4165.AOI.blast.table:NZ_CP0842461.4165.AOI_8	44526	24454	-	156.2;Mundticin_KS	bacteriocinII	40.0
NZ_CP1236111.13707.AOI.blast.table:NZ_CP1236111.13707.AOI_6	2317112	2296935	-	155.2;Mundticin_ATO6	bacteriocinII	48.9
NZ_CP1236111.13707.AOI.blast.table:NZ_CP1236111.13707.AOI_7	2317055	2296935	-	156.2;Mundticin_KS	bacteriocinII	46.2
NZ_CP1236131.13709.AOI.blast.table:NZ_CP1236131.13709.AOI_6	2315781	2295604	-	155.2;Mundticin_ATO6	bacteriocinII	48.9
NZ_CP1236131.13709.AOI.blast.table:NZ_CP1236131.13709.AOI_7	2315724	2295604	-	156.2;Mundticin_KS	bacteriocinII	46.2
NZ_CP1236151.13802.AOI.blast.table:NZ_CP1236151.13802.AOI_6	2273287	2253110	-	155.2;Mundticin_ATO6	bacteriocinII	48.9
NZ_CP1236151.13802.AOI.blast.table:NZ_CP1236151.13802.AOI_7	2273230	2253110	-	156.2;Mundticin_KS	bacteriocinII	46.2
NZ_JAFLIC0100000131.2755.AOI.blast.table:NZ_JAFLIC0100000131.2755.AOI_10	10914	0	-	154.2;Mundticin	bacteriocinII	43.9
NZ_JAFLIC0100000131.2755.AOI.blast.table:NZ_JAFLIC0100000131.2755.AOI_11	10974	0	-	155.2;Mundticin_ATO6	bacteriocinII	48.9
NZ_JAFLIC0100000131.2755.AOI.blast.table:NZ_JAFLIC0100000131.2755.AOI_12	10917	0	-	156.2;Mundticin_KS	bacteriocinII	46.2
NZ_JAFLID0100000091.2781.AOI.blast.table:NZ_JAFLID0100000091.2781.AOI_10	10918	0	-	154.2;Mundticin	bacteriocinII	43.9
NZ_JAFLID0100000091.2781.AOI.blast.table:NZ_JAFLID0100000091.2781.AOI_11	10978	0	-	155.2;Mundticin_ATO6	bacteriocinII	48.9
NZ_JAFLID0100000091.2781.AOI.blast.table:NZ_JAFLID0100000091.2781.AOI_12	10921	0	-	156.2;Mundticin_KS	bacteriocinII	46.2
NZ_JAFLIE0100000061.2676.AOI.blast.table:NZ_JAFLIE0100000061.2676.AOI_10	10917	0	-	154.2;Mundticin	bacteriocinII	43.9
NZ_JAFLIE0100000061.2676.AOI.blast.table:NZ_JAFLIE0100000061.2676.AOI_11	10977	0	-	155.2;Mundticin_ATO6	bacteriocinII	48.9
NZ_JAFLIE0100000061.2676.AOI.blast.table:NZ_JAFLIE0100000061.2676.AOI_12	10920	0	-	156.2;Mundticin_KS	bacteriocinII	46.2
NZ_JAFLIF0100000091.2664.AOI.blast.table:NZ_JAFLIF0100000091.2664.AOI_10	99830	110745	+	154.2;Mundticin	bacteriocinII	43.9
NZ_JAFLIF0100000091.2664.AOI.blast.table:NZ_JAFLIF0100000091.2664.AOI_11	99770	110745	+	155.2;Mundticin_ATO6	bacteriocinII	48.9
NZ_JAFLIF0100000091.2664.AOI.blast.table:NZ_JAFLIF0100000091.2664.AOI_12	99827	110745	+	156.2;Mundticin_KS	bacteriocinII	46.2
NZ_JAFLIM0100000121.2298.AOI.blast.table:NZ_JAFLIM0100000121.2298.AOI_10	99830	110744	+	154.2;Mundticin	bacteriocinII	43.9
NZ_JAFLIM0100000121.2298.AOI.blast.table:NZ_JAFLIM0100000121.2298.AOI_11	99770	110744	+	155.2;Mundticin_ATO6	bacteriocinII	48.9
NZ_JAFLIM0100000121.2298.AOI.blast.table:NZ_JAFLIM0100000121.2298.AOI_12	99827	110744	+	156.2;Mundticin_KS	bacteriocinII	46.2
NZ_JAGPYO0100000031.1347.AOI.blast.table:NZ_JAGPYO0100000031.1347.AOI_9	185013	174627	-	154.2;Mundticin	bacteriocinII	43.9
NZ_JAGPYO0100000031.1347.AOI.blast.table:NZ_JAGPYO0100000031.1347.AOI_10	185013	174627	-	155.2;Mundticin_ATO6	bacteriocinII	48.9
NZ_JAGPYO0100000031.1347.AOI.blast.table:NZ_JAGPYO0100000031.1347.AOI_11	185013	174627	-	156.2;Mundticin_KS	bacteriocinII	46.2
NZ_JAIZEY0100000551.4229.AOI.blast.table:NZ_JAIZEY0100000551.4229.AOI_7	7147	0	-	154.2;Mundticin	bacteriocinII	40.8
NZ_JAIZEY0100000551.4229.AOI.blast.table:NZ_JAIZEY0100000551.4229.AOI_8	7147	0	-	155.2;Mundticin_ATO6	bacteriocinII	40.4
NZ_JAIZEY0100000551.4229.AOI.blast.table:NZ_JAIZEY0100000551.4229.AOI_9	7147	0	-	156.2;Mundticin_KS	bacteriocinII	40.8
NZ_JAIZWU0100000581.11904.AOI.blast.table:NZ_JAIZWU0100000581.11904.AOI_7	7446	0	-	154.2;Mundticin	bacteriocinII	40.8
NZ_JAIZWU0100000581.11904.AOI.blast.table:NZ_JAIZWU0100000581.11904.AOI_8	7446	0	-	155.2;Mundticin_ATO6	bacteriocinII	41.2
NZ_JAIZWU0100000581.11904.AOI.blast.table:NZ_JAIZWU0100000581.11904.AOI_9	7446	0	-	156.2;Mundticin_KS	bacteriocinII	41.2
NZ_JAIZYF0100001241.9892.AOI.blast.table:NZ_JAIZYF0100001241.9892.AOI_12	1	3092	+	154.2;Mundticin	bacteriocinII	35.8
NZ_JAJUKM0100000721.9067.AOI.blast.table:NZ_JAJUKM0100000721.9067.AOI_8	1	3263	+	154.2;Mundticin	bacteriocinII	37.0
NZ_JAJUKM0100000721.9067.AOI.blast.table:NZ_JAJUKM0100000721.9067.AOI_9	1	3263	+	155.2;Mundticin_ATO6	bacteriocinII	37.0
NZ_JAJUKM0100000721.9067.AOI.blast.table:NZ_JAJUKM0100000721.9067.AOI_10	1	3263	+	156.2;Mundticin_KS	bacteriocinII	37.0
NZ_JAMRMO0100000181.13759.AOI.blast.table:NZ_JAMRMO0100000181.13759.AOI_10	15171	0	-	154.2;Mundticin	bacteriocinII	43.5
NZ_JAMRMO0100000181.13759.AOI.blast.table:NZ_JAMRMO0100000181.13759.AOI_11	15228	0	-	155.2;Mundticin_ATO6	bacteriocinII	55.5
NZ_JAMRMO0100000181.13759.AOI.blast.table:NZ_JAMRMO0100000181.13759.AOI_12	15207	0	-	156.2;Mundticin_KS	bacteriocinII	47.4
NZ_JAMYDM0100000831.5475.AOI.blast.table:NZ_JAMYDM0100000831.5475.AOI_10	1	3700	+	154.2;Mundticin	bacteriocinII	43.5
NZ_JAMYDM0100000831.5475.AOI.blast.table:NZ_JAMYDM0100000831.5475.AOI_11	1	3700	+	155.2;Mundticin_ATO6	bacteriocinII	55.5
NZ_JAMYDM0100000831.5475.AOI.blast.table:NZ_JAMYDM0100000831.5475.AOI_12	1	3700	+	156.2;Mundticin_KS	bacteriocinII	47.4
NZ_JAMYDM0100000881.5505.AOI.blast.table:NZ_JAMYDM0100000881.5505.AOI_7	1	3375	+	154.2;Mundticin	bacteriocinII	40.0
NZ_JAMYDM0100000881.5505.AOI.blast.table:NZ_JAMYDM0100000881.5505.AOI_8	1	3375	+	155.2;Mundticin_ATO6	bacteriocinII	38.9
NZ_JAMYDM0100000881.5505.AOI.blast.table:NZ_JAMYDM0100000881.5505.AOI_9	1	3375	+	156.2;Mundticin_KS	bacteriocinII	40.4
NZ_JAMYDN0100000831.5551.AOI.blast.table:NZ_JAMYDN0100000831.5551.AOI_10	1	3700	+	154.2;Mundticin	bacteriocinII	43.5
NZ_JAMYDN0100000831.5551.AOI.blast.table:NZ_JAMYDN0100000831.5551.AOI_11	1	3700	+	155.2;Mundticin_ATO6	bacteriocinII	55.5
NZ_JAMYDN0100000831.5551.AOI.blast.table:NZ_JAMYDN0100000831.5551.AOI_12	1	3700	+	156.2;Mundticin_KS	bacteriocinII	47.4
NZ_JAMYDN0100000881.5592.AOI.blast.table:NZ_JAMYDN0100000881.5592.AOI_7	1	3375	+	154.2;Mundticin	bacteriocinII	40.0
NZ_JAMYDN0100000881.5592.AOI.blast.table:NZ_JAMYDN0100000881.5592.AOI_8	1	3375	+	155.2;Mundticin_ATO6	bacteriocinII	38.9
NZ_JAMYDN0100000881.5592.AOI.blast.table:NZ_JAMYDN0100000881.5592.AOI_9	1	3375	+	156.2;Mundticin_KS	bacteriocinII	40.4
NZ_JANDLX0100000451.5354.AOI.blast.table:NZ_JANDLX0100000451.5354.AOI_7	7132	0	-	154.2;Mundticin	bacteriocinII	40.8
NZ_JANDLX0100000451.5354.AOI.blast.table:NZ_JANDLX0100000451.5354.AOI_8	7132	0	-	155.2;Mundticin_ATO6	bacteriocinII	40.4
NZ_JANDLX0100000451.5354.AOI.blast.table:NZ_JANDLX0100000451.5354.AOI_9	7132	0	-	156.2;Mundticin_KS	bacteriocinII	41.2
NZ_JAQCQZ0100000581.8239.AOI.blast.table:NZ_JAQCQZ0100000581.8239.AOI_12	3242	0	-	154.2;Mundticin	bacteriocinII	39.3
NZ_JAQCQZ0100000581.8239.AOI.blast.table:NZ_JAQCQZ0100000581.8239.AOI_13	3242	0	-	155.2;Mundticin_ATO6	bacteriocinII	40.4
NZ_JAQCQZ0100000581.8239.AOI.blast.table:NZ_JAQCQZ0100000581.8239.AOI_14	3242	0	-	156.2;Mundticin_KS	bacteriocinII	40.4
NZ_JAQCRB0100000611.8185.AOI.blast.table:NZ_JAQCRB0100000611.8185.AOI_7	6177	0	-	154.2;Mundticin	bacteriocinII	41.2
NZ_JAQCRB0100000611.8185.AOI.blast.table:NZ_JAQCRB0100000611.8185.AOI_8	6177	0	-	155.2;Mundticin_ATO6	bacteriocinII	42.0
NZ_JAQCRB0100000611.8185.AOI.blast.table:NZ_JAQCRB0100000611.8185.AOI_9	6177	0	-	156.2;Mundticin_KS	bacteriocinII	42.0
NZ_JAQDMQ0100000091.5670.AOI.blast.table:NZ_JAQDMQ0100000091.5670.AOI_10	99728	110543	+	154.2;Mundticin	bacteriocinII	43.9
NZ_JAQDMQ0100000091.5670.AOI.blast.table:NZ_JAQDMQ0100000091.5670.AOI_11	99668	110543	+	155.2;Mundticin_ATO6	bacteriocinII	48.9
NZ_JAQDMQ0100000091.5670.AOI.blast.table:NZ_JAQDMQ0100000091.5670.AOI_12	99725	110543	+	156.2;Mundticin_KS	bacteriocinII	46.2
NZ_JAQFBA0100000501.8397.AOI.blast.table:NZ_JAQFBA0100000501.8397.AOI_7	1	7082	+	154.2;Mundticin	bacteriocinII	41.2
NZ_JAQFBA0100000501.8397.AOI.blast.table:NZ_JAQFBA0100000501.8397.AOI_8	1	7082	+	155.2;Mundticin_ATO6	bacteriocinII	41.2
NZ_JAQFBA0100000501.8397.AOI.blast.table:NZ_JAQFBA0100000501.8397.AOI_9	1	7082	+	156.2;Mundticin_KS	bacteriocinII	41.2
NZ_JAQFBF0100000421.8376.AOI.blast.table:NZ_JAQFBF0100000421.8376.AOI_7	1	8150	+	154.2;Mundticin	bacteriocinII	41.2
NZ_JAQFBF0100000421.8376.AOI.blast.table:NZ_JAQFBF0100000421.8376.AOI_8	1	8150	+	155.2;Mundticin_ATO6	bacteriocinII	41.2
NZ_JAQFBF0100000421.8376.AOI.blast.table:NZ_JAQFBF0100000421.8376.AOI_9	1	8150	+	156.2;Mundticin_KS	bacteriocinII	41.2
NZ_JARQBH0100000411.13508.AOI.blast.table:NZ_JARQBH0100000411.13508.AOI_7	7511	0	-	154.2;Mundticin	bacteriocinII	41.2
NZ_JARQBH0100000411.13508.AOI.blast.table:NZ_JARQBH0100000411.13508.AOI_8	7511	0	-	155.2;Mundticin_ATO6	bacteriocinII	41.2
NZ_JARQBH0100000411.13508.AOI.blast.table:NZ_JARQBH0100000411.13508.AOI_9	7511	0	-	156.2;Mundticin_KS	bacteriocinII	41.2
NZ_JASGSE0100000291.13034.AOI.blast.table:NZ_JASGSE0100000291.13034.AOI_8	1	9974	+	154.2;Mundticin	bacteriocinII	41.2
NZ_JASGSE0100000291.13034.AOI.blast.table:NZ_JASGSE0100000291.13034.AOI_9	1	9974	+	155.2;Mundticin_ATO6	bacteriocinII	41.2
NZ_JASGSE0100000291.13034.AOI.blast.table:NZ_JASGSE0100000291.13034.AOI_10	1	9974	+	156.2;Mundticin_KS	bacteriocinII	41.2
NZ_JBBNPR0100000391.14144.AOI.blast.table:NZ_JBBNPR0100000391.14144.AOI_12	10557	0	-	154.2;Mundticin	bacteriocinII	39.3
NZ_JBBNPR0100000391.14144.AOI.blast.table:NZ_JBBNPR0100000391.14144.AOI_13	10561	0	-	155.2;Mundticin_ATO6	bacteriocinII	40.4
NZ_JBBNPR0100000391.14144.AOI.blast.table:NZ_JBBNPR0100000391.14144.AOI_14	10561	0	-	156.2;Mundticin_KS	bacteriocinII	40.4
NZ_JBFSLT0100000521.14320.AOI.blast.table:NZ_JBFSLT0100000521.14320.AOI_8	1	3529	+	154.2;Mundticin	bacteriocinII	37.0
NZ_JBFSLT0100000521.14320.AOI.blast.table:NZ_JBFSLT0100000521.14320.AOI_9	1	3529	+	155.2;Mundticin_ATO6	bacteriocinII	37.0
NZ_JBFSLT0100000521.14320.AOI.blast.table:NZ_JBFSLT0100000521.14320.AOI_10	1	3529	+	156.2;Mundticin_KS	bacteriocinII	37.0
NZ_JBFTFI0100000081.14297.AOI.blast.table:NZ_JBFTFI0100000081.14297.AOI_10	99809	110703	+	154.2;Mundticin	bacteriocinII	43.9
NZ_JBFTFI0100000081.14297.AOI.blast.table:NZ_JBFTFI0100000081.14297.AOI_11	99749	110703	+	155.2;Mundticin_ATO6	bacteriocinII	48.9
NZ_JBFTFI0100000081.14297.AOI.blast.table:NZ_JBFTFI0100000081.14297.AOI_12	99806	110703	+	156.2;Mundticin_KS	bacteriocinII	46.2
NZ_PGPQ010000041.788.AOI.blast.table:NZ_PGPQ010000041.788.AOI_9	86493	66376	-	154.2;Mundticin	bacteriocinII	43.9
NZ_PGPQ010000041.788.AOI.blast.table:NZ_PGPQ010000041.788.AOI_10	86553	66376	-	155.2;Mundticin_ATO6	bacteriocinII	48.9
NZ_PGPQ010000041.788.AOI.blast.table:NZ_PGPQ010000041.788.AOI_11	86496	66376	-	156.2;Mundticin_KS	bacteriocinII	46.2
NZ_PGPR010000041.659.AOI.blast.table:NZ_PGPR010000041.659.AOI_9	99683	119800	+	154.2;Mundticin	bacteriocinII	43.9
NZ_PGPR010000041.659.AOI.blast.table:NZ_PGPR010000041.659.AOI_10	99623	119800	+	155.2;Mundticin_ATO6	bacteriocinII	48.9
NZ_PGPR010000041.659.AOI.blast.table:NZ_PGPR010000041.659.AOI_11	99680	119800	+	156.2;Mundticin_KS	bacteriocinII	46.2
NZ_SWBS010000081.1.AOI.blast.table:NZ_SWBS010000081.1.AOI_10	10844	0	-	154.2;Mundticin	bacteriocinII	43.9
NZ_SWBS010000081.1.AOI.blast.table:NZ_SWBS010000081.1.AOI_11	10904	0	-	155.2;Mundticin_ATO6	bacteriocinII	48.9
NZ_SWBS010000081.1.AOI.blast.table:NZ_SWBS010000081.1.AOI_12	10847	0	-	156.2;Mundticin_KS	bacteriocinII	46.2
NZ_WOTR010000461.117.AOI.blast.table:NZ_WOTR010000461.117.AOI_7	1	7171	+	154.2;Mundticin	bacteriocinII	37.0
