# Supplementary material for: Genome-Resolved In Silico Analysis of Poultry and Swine Lactobacillales Provides a Data- Driven Framework for Elucidating Metabolic Synergies in Multi-Strain Probiotics
Source: Research Square preprint supplement (doi:10.21203/rs.3.rs-7234892/v1), 2025-08-12
Supplement: Supplementary file 10 [file fa872e28da9d0432b5ca14ce.xlsx]

## Sheet: overview
Features	Enterococcus lactis m3d	Enterococcus mundtii 766	Ligilactobacillus agilis 1126	Limosilactobacillus reuteri A1A	Limosilactobacillus vaginalis 5121
Genomic size (bp)	2,581,108	2,777,232	2,153,544	1,886,891	1,810,976
Sequencing Depth (mean)	109x	98x	108x	115x	63x
GC content (%)	38	39	42	39	41
Genes (total)	2.724	2.736	2.163	1.978	1.784
CDSs (total)	2.633	2.649	2.046	1.888	1.705
tRNA	69	65	90	69	60
5S rRNA	6	6	8	6	5
16S rRNA	6	6	8	6	5
23S rRNA	6	6	8	6	5
ncRNA	4	4	3	3	4
Pseudogenes	110	45	46	60	38
Prophage regions (intacts) – prophage 1 (kb) – prophage 2 (kb)	41 43.6	46.2 47.2	48.3 79.5	44.1 -	43.7 _
Plasmids – plasmid 1 (kb) – plasmid 2 (kb) – plasmid 3 (kb)	160 - -	47 - -	-	13.2 53.1 -	9 - -
Antibiotic Resistance-related genes	chr encoded − msr(C), efmA (macrolide/MFS efflux) − aac(6′) (aminoglycoside)	chr encoded − AAC(6′)-Ii (aminoglycoside)	-	-	-
Bacteriocins genes	enterocin HF	-	-	-	-
Virulence-related genes	chr encoded − sgrA (adhesion/cell wall anchored protein) − acm (adhesion to collagen, pseudogene)	-	-	plasmid encoded − erm(B)	-
CheckM (completeness/contamination)	99.42/0.27	99.15/0	98.37/1.31	94.45/0.89	99.35/0
BUSCO (completeness)	99.2	99.5	99.7	99.5	99.8

## Sheet: ANI
user_genome	classification	fastani_reference	fastani_reference_radius	fastani_taxonomy	fastani_ani	fastani_af	closest_placement_reference	closest_placement_radius	closest_placement_taxonomy	closest_placement_ani	closest_placement_af	pplacer_taxonomy	classification_method	note	other_related_references(genome_id,species_name,radius,ANI,AF)	msa_percent	translation_table	red_value	warnings
Enterococcus lactis m3d	d__Bacteria;p__Bacillota;c__Bacilli;o__Lactobacillales;f__Enterococcaceae;g__Enterococcus_B;s__Enterococcus_B lactis	GCF_015751045.1	95.0	d__Bacteria;p__Bacillota;c__Bacilli;o__Lactobacillales;f__Enterococcaceae;g__Enterococcus_B;s__Enterococcus_B lactis	97.87	0.90	GCF_015751045.1	95.0	d__Bacteria;p__Bacillota;c__Bacilli;o__Lactobacillales;f__Enterococcaceae;g__Enterococcus_B;s__Enterococcus_B lactis	97.87	0.90	d__Bacteria;p__Bacillota;c__Bacilli;o__Lactobacillales;f__Enterococcaceae;g__Enterococcus_B;s__	taxonomic classification defined by topology and ANI	topological placement and ANI have congruent species assignments	GCF_001544255.1, s__Enterococcus_B faecium, 95.0, 95.48, 0.916; GCF_011038845.1, s__Enterococcus_B sp011038845, 95.0, 81.5, 0.608; GCF_001544215.1, s__Enterococcus_B durans, 95.0, 80.58, 0.437; GCF_000271405.2, s__Enterococcus_B hirae, 95.0, 80.25, 0.443; GCF_013394305.1, s__Enterococcus_B pernyi, 96.3614, 80.12, 0.4; GCF_003957375.1, s__Enterococcus_B mundtii_C, 96.247, 80.1, 0.403; GCA_01568086…	96.44	11	N/A	N/A
Enterococcus mundtii 766	d__Bacteria;p__Bacillota;c__Bacilli;o__Lactobacillales;f__Enterococcaceae;g__Enterococcus_B;s__Enterococcus_B mundtii_C	GCF_003957375.1	96.25	d__Bacteria;p__Bacillota;c__Bacilli;o__Lactobacillales;f__Enterococcaceae;g__Enterococcus_B;s__Enterococcus_B mundtii_C	99.82	0.98	GCF_003957375.1	96.25	d__Bacteria;p__Bacillota;c__Bacilli;o__Lactobacillales;f__Enterococcaceae;g__Enterococcus_B;s__Enterococcus_B mundtii_C	99.82	0.98	d__Bacteria;p__Bacillota;c__Bacilli;o__Lactobacillales;f__Enterococcaceae;g__Enterococcus_B;s__	taxonomic classification defined by topology and ANI	topological placement and ANI have congruent species assignments	GCF_013394305.1, s__Enterococcus_B pernyi, 96.3614, 96.31, 0.951; GCF_002813755.1, s__Enterococcus_B mundtii, 96.3614, 95.41, 0.934; GCF_002947535.1, s__Enterococcus_B mundtii_B, 95.0, 93.49, 0.892; GCF_017316305.1, s__Enterococcus_B sp017316305, 95.0, 87.5, 0.853; GCF_002140175.1, s__Enterococcus_B sp002140175, 95.0, 80.5, 0.521; GCF_001544215.1, s__Enterococcus_B durans, 95.0, 80.12, 0.402; GCF…	96.56	11	N/A	N/A
Ligilactobacillus agilis 1126	d__Bacteria;p__Bacillota;c__Bacilli;o__Lactobacillales;f__Lactobacillaceae;g__Ligilactobacillus;s__Ligilactobacillus agilis	GCF_001436215.1	95.0	d__Bacteria;p__Bacillota;c__Bacilli;o__Lactobacillales;f__Lactobacillaceae;g__Ligilactobacillus;s__Ligilactobacillus agilis	97.14	0.87	GCF_001436215.1	95.00	d__Bacteria;p__Bacillota;c__Bacilli;o__Lactobacillales;f__Lactobacillaceae;g__Ligilactobacillus;s__Ligilactobacillus agilis	97.14	0.87	d__Bacteria;p__Bacillota;c__Bacilli;o__Lactobacillales;f__Lactobacillaceae;g__Ligilactobacillus;s__	taxonomic classification defined by topology and ANI	topological placement and ANI have congruent species assignments	N/A	95.95	11	N/A	N/A
Limosilactobacillus reuteri A1A	d__Bacteria;p__Bacillota;c__Bacilli;o__Lactobacillales;f__Lactobacillaceae;g__Limosilactobacillus;s__Limosilactobacillus reuteri	GCF_000016825.1	95.0	d__Bacteria;p__Bacillota;c__Bacilli;o__Lactobacillales;f__Lactobacillaceae;g__Limosilactobacillus;s__Limosilactobacillus reuteri	96.19	0.84	GCF_000016825.1	95.0	d__Bacteria;p__Bacillota;c__Bacilli;o__Lactobacillales;f__Lactobacillaceae;g__Limosilactobacillus;s__Limosilactobacillus reuteri	97.17	0.84	d__Bacteria;p__Bacillota;c__Bacilli;o__Lactobacillales;f__Lactobacillaceae;g__Limosilactobacillus;s__	taxonomic classification defined by topology and ANI	topological placement and ANI have congruent species assignments	GCF_003072625.1, s__Limosilactobacillus reuteri_D, 95.0, 95.62, 0.849; GCF_013694365.1, s__Limosilactobacillus reuteri_E, 95.0, 94.04, 0.777; GCF_014145615.1, s__Limosilactobacillus balticus, 95.0, 93.96, 0.841; GCF_020784725.1, s__Limosilactobacillus reuteri_F, 95.0, 93.84, 0.833; GCF_014145585.1, s__Limosilactobacillus agrestis, 95.0, 90.65, 0.782; GCF_014635905.1, s__Limosilactobacillus caviae…	96.29	11	N/A	N/A
Limosilactobacillus vaginalis 5121	d__Bacteria;p__Bacillota;c__Bacilli;o__Lactobacillales;f__Lactobacillaceae;g__Limosilactobacillus;s__Limosilactobacillus vaginalis	GCF_000159435.1	95.0	d__Bacteria;p__Bacillota;c__Bacilli;o__Lactobacillales;f__Lactobacillaceae;g__Limosilactobacillus;s__Limosilactobacillus vaginalis	99.08	0.86	GCF_000159435.1	95.0	d__Bacteria;p__Bacillota;c__Bacilli;o__Lactobacillales;f__Lactobacillaceae;g__Limosilactobacillus;s__Limosilactobacillus vaginalis	99.08	0.86	d__Bacteria;p__Bacillota;c__Bacilli;o__Lactobacillales;f__Lactobacillaceae;g__Limosilactobacillus;s__	taxonomic classification defined by topology and ANI	topological placement and ANI have congruent species assignments	GCA_946487795.1, s__Limosilactobacillus sp946487795, 95.0, 93.68, 0.446; GCF_014838735.1, s__Limosilactobacillus portuensis, 95.0, 90.97, 0.775; GCF_014838745.1, s__Limosilactobacillus urinaemulieris, 95.0, 90.74, 0.736; GCF_014836425.1, s__Limosilactobacillus avistercoris, 95.0, 85.4, 0.382; GCF_022651205.1, s__Limosilactobacillus sp022651205, 95.0, 83.93, 0.37; GCF_014145505.1, s__Limosilactoba…	96.66	11	N/A	N/A
